# Supplementary material
Source: MDPI journal article supplement (https://www.mdpi.com/1424-2818/14/10/805)
Supplement: s1 [file s1]

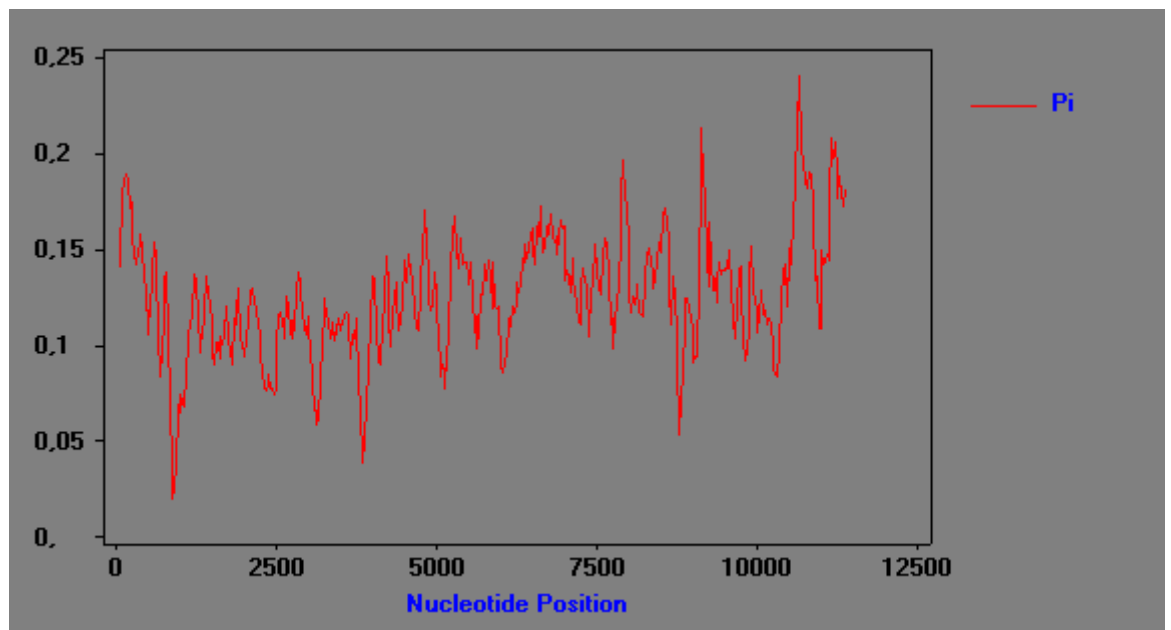

Figure S3. График распределения нуклеотидного разнообразия ( $P_i$ ) на сайт по всей длине последовательностей 13 PCGs митогенома камбал семейства Pleuronectidae.

По оси Y дано распределение значений полиморфизма (diversity),  $P_i$ ). Красным цветом показано распределение по нуклеотидным позициям (ось X) для значений  $P_i$ .
