# Supplementary material
Source: MDPI journal article supplement (https://www.mdpi.com/1424-2818/14/10/805)
Supplement: s1 [file s1]

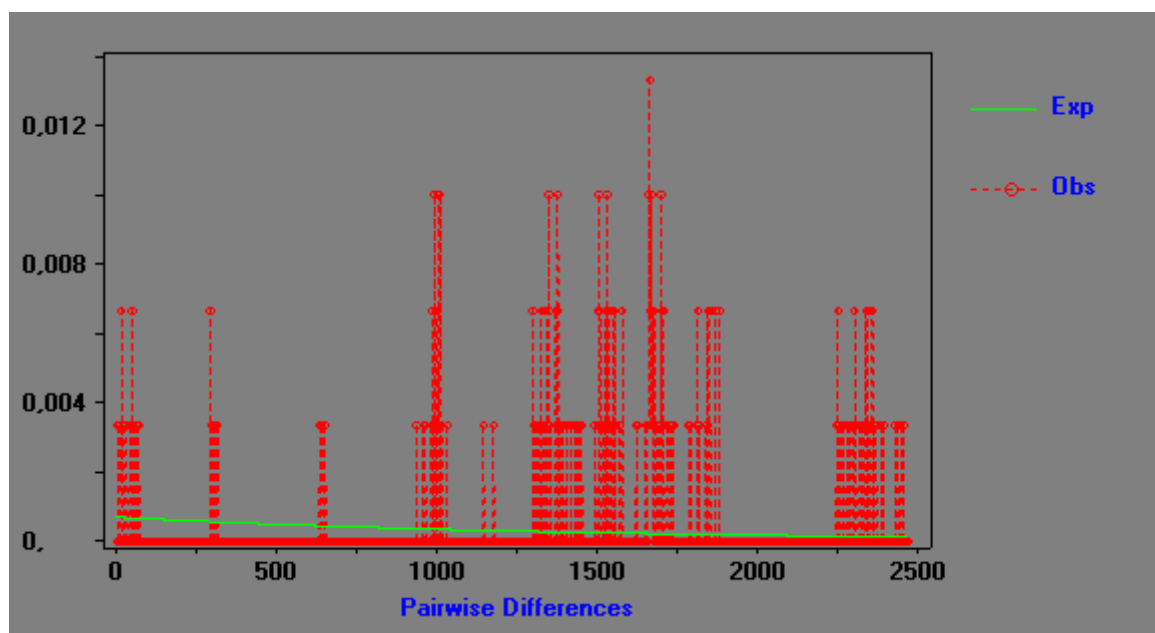

Figure S4. График распределения попарных различий для 13 PCGs митогенома камбал семейства Pleuronectidae.

По оси Y дано распределение значений частот попарных различий, для 12 выделенных скользящих окон оценки дивергенции. Красным цветом показан диапазон значений  $k$  (ось X), зеленым цветом дано ожидаемое распределение для значений  $k$ . Среднее число попарных различий (Average Number of Pairwise Difference) составило,  $k=1440.113$ .
