# Supplementary material
Source: MDPI journal article supplement (https://www.mdpi.com/1424-2818/14/10/805)
Supplement: s1 [file s1]

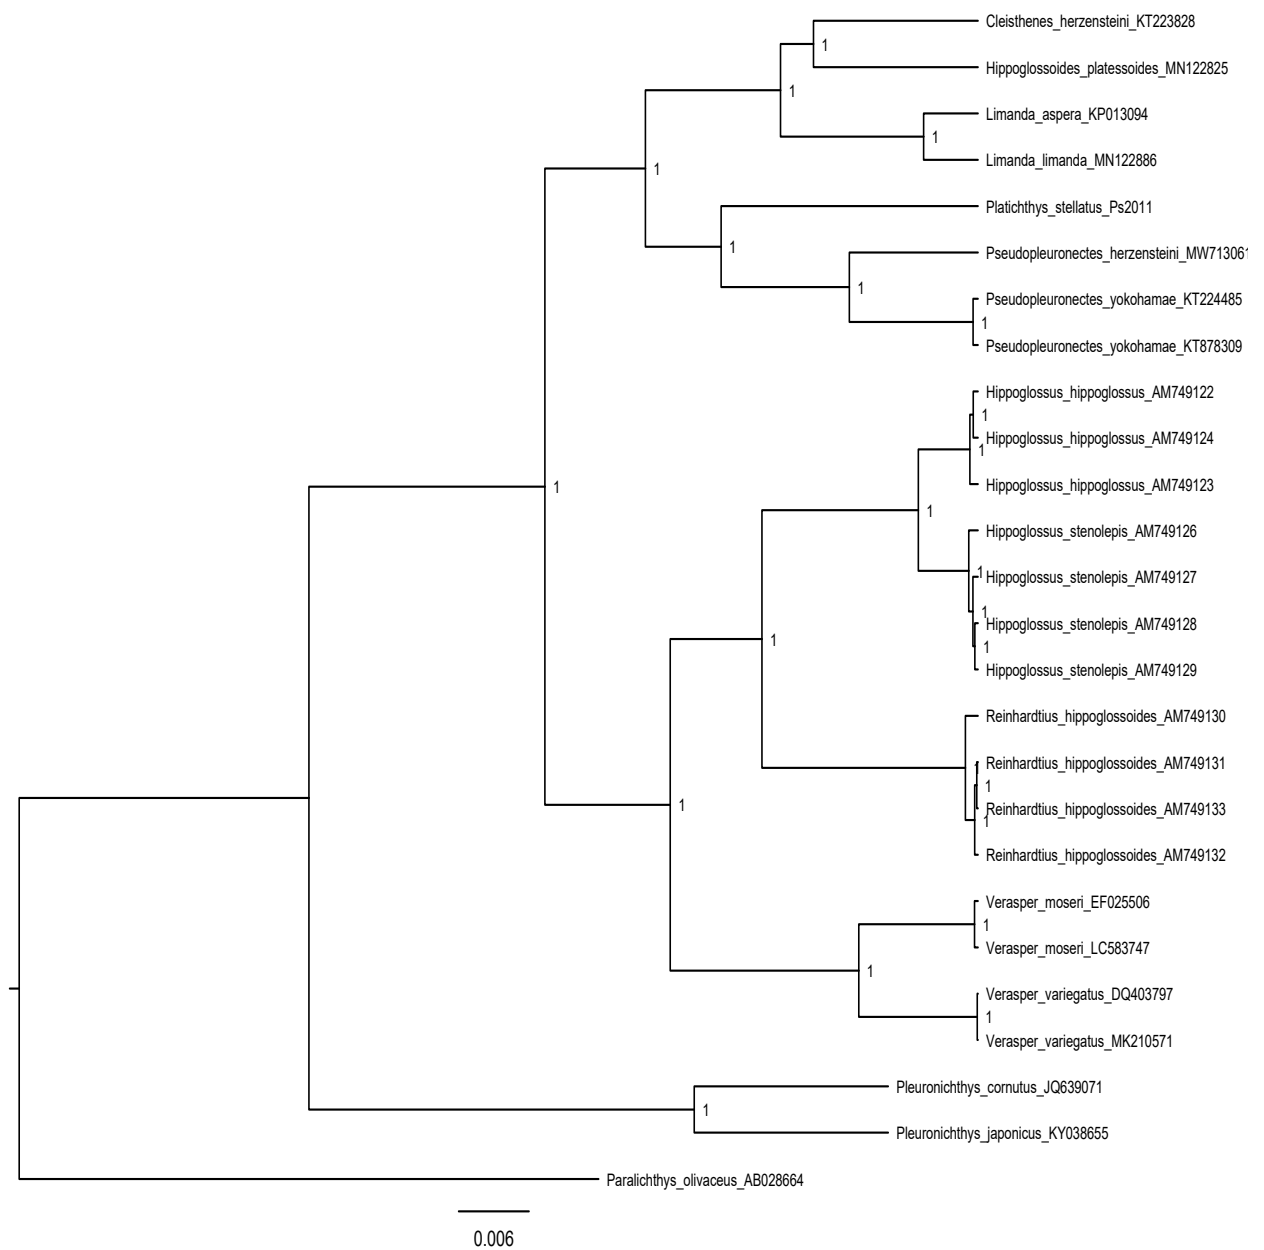

Figure S1. BEAST-2 and FigTree topology reconstruction based on 13 PCG-sequences of 26 analyzed flounder representatives of the family Pleuronectidae with posterior probabilities implemented.

Details for the simulation of CA-based tree at current image given in the text, and basically, same as in Fig. 4. For the tree simulation  $n=5 \times 10^7$  generation are used. Scale (bottom) shows branch length for the tree rooted at the out-group taxon *Paralichthys olivaceus*.
