# Supplementary material
Source: MDPI journal article supplement (https://www.mdpi.com/1424-2818/14/10/805)
Supplement: s1 [file s1]

Table 8S. Test of substitution saturation for Pleuronectoidei PCGs mitogenome sequences

| =====  |       |          |        |      |        |           |        |      |        |
|--------|-------|----------|--------|------|--------|-----------|--------|------|--------|
| OTU    |       |          |        |      |        |           |        |      |        |
| Number | Iss   | Iss.cSym | T      | d.f. | P      | Iss.cAsym | T      | d.f. | P      |
| =====  |       |          |        |      |        |           |        |      |        |
| 4      | 0.309 | 0.854    | 87.831 | 7539 | 0.0000 | 0,845     | 86.405 | 7539 | 0.0000 |
| 8      | 0.310 | 0.846    | 77.125 | 7539 | 0.0000 | 0,766     | 65.633 | 7539 | 0.0000 |
| 16     | 0.310 | 0.842    | 72.880 | 7539 | 0.0000 | 0,680     | 50.723 | 7539 | 0.0000 |
| 32     | 0.314 | 0.815    | 66.858 | 7539 | 0.0000 | 0,570     | 34.233 | 7539 | 0.0000 |
| =====  |       |          |        |      |        |           |        |      |        |

Note. Analysis performed on fully resolved sites only. Testing whether the observed Iss is significantly lower than Iss.c. IssSym is Iss.c assuming a symmetrical topology. IssAsym is Iss.c assuming an asymmetrical topology. Two-tailed t-tests are used (Xia et al. 2003; Xia and Lemey 2009).

Interpretation of results:

| -----                  |                   |                             |
|------------------------|-------------------|-----------------------------|
| Significant Difference |                   |                             |
| -----                  |                   |                             |
|                        | Yes               | No                          |
| -----                  |                   |                             |
| Iss < Iss.c            | Little saturation | Substantial saturation      |
| -----                  |                   |                             |
| Iss > Iss.c            | Useless sequences | Very poor for phylogenetics |
