# Supplementary material
Source: MDPI journal article supplement (https://www.mdpi.com/1424-2818/14/10/805)
Supplement: s1 [file s1]

Table 1S, Supplement  
File: Fl26seq-pt8-11401-123ps4.nex

#NEXUS

[ TITLE Fl-26sq13CDS-pt4fin2]

BEGIN TAXA;

DIMENSIONS NTAX=26;

TAXLABELS

Cleisthenes\_herzensteini\_KT223828  
Hippoglossoides\_platessoides\_MN122825  
Hippoglossus\_hippoglossus\_AM749122  
Hippoglossus\_hippoglossus\_AM749123  
Hippoglossus\_hippoglossus\_AM749124  
Hippoglossus\_stenolepis\_AM749126  
Hippoglossus\_stenolepis\_AM749127  
Hippoglossus\_stenolepis\_AM749128  
Hippoglossus\_stenolepis\_AM749129  
Limanda\_aspera\_KP013094  
Limanda\_limanda\_MN122886  
Platichthys\_stellatus\_PS2011  
Pleuronichthys\_cornutus\_JQ639071  
Pleuronichthys\_japonicus\_KY038655  
Pseudopleuronectes\_herzensteini\_MW713061  
Pseudopleuronectes\_yokohamae\_KT224485  
Pseudopleuronectes\_yokohamae\_KT878309  
Reinhardtius\_hippoglossoides\_AM749130  
Reinhardtius\_hippoglossoides\_AM749131  
Reinhardtius\_hippoglossoides\_AM749132  
Reinhardtius\_hippoglossoides\_AM749133  
Verasper\_moseri\_EF025506  
Verasper\_moseri\_LC583747  
Verasper\_variegatus\_DQ403797  
Verasper\_variegatus\_MK210571  
Paralichthys\_olivaceus\_AB028664

;

END;

BEGIN characters;

DIMENSIONS NTAX=26 NCHAR=11401;

FORMAT DATATYPE=DNA INTERLEAVE=NO GAP=-;

Matrix

Cleisthenes\_herzensteini\_KT223828

ATGATACTAAGCTTCTTTGACCAATTTATGTCCCCCGTATTCCTTGGTATCCCCCTAA  
TTGCGCTAGCAATTACGCTGCCCTGAACCCTATTCCCAGCCCCCTGTCTTCGCTGATTA  
AACAAACCGTATAGTTTCACTTCAAGGGTGATTTATTAGCGGTTTTACATCTCAACTTC  
TTCTCCCCTAAACCCCGCCGGACACAAATGAGCTATCTTATTTGCCTCACTAATCTT  
TCCTCTCTCTATCAATATGCTCGGACTCCTACCGTACACATTTACACCCACCACTCAA  
CTCTCACTTAACCTTGGCCTCGCAGTCCCCTCTGATTGGCAACTGTAATTATGGTAT  
GCGGAATCAACCGACAGTCGCTCTAGGCCACCTCCTTCCAGAAGGGACCCCCACCC  
CTCTCATCCCCGTCCTAATCATTATCGAAACAATTAGCCTATTTATTCGACCTCTCGC  
CCTTGGTGTTTCGACTTACAGCAAATCTTACAGCTGGCCACCTGCTCATTCAACTCATT  
GCAACAGCTGCCTTCGTCCTTCTTCCGCTCATGCCTGTGGTTGCTATTCTAACAGCAA

CAGTTCTCTTTCTCCTCACTCTCCTAGAAAGTTGCCGTTGCTATAATTCAGGCCTATGT  
CTTCGTTTTACTCCTGAGTCTTTACCTACAAGAAAACGTCTAATGCCCAACTGAATC  
CCGCACCCTGATTTGCAATTTTGGTTTTCTCTTGAATAATCCTTTTAACTGTTATTCCC  
CCAAAAGTTTTAGCTCATACTTACCCCAACGAGCCAACCTCTCAAAGCACACAAAA  
ACAAAACAGAACCCTGAAACTGACCATGATACTAAGTGGCAATCACACGTTGATTT  
TTCTCGACCAATCACAAAGACATCGGCACCCTCTATCTCGTATTTGGTGCCTGAGCC  
GGAATAGTGGGGACAGGCCTAAGTCTACTCATTCGAGCAGAACTCAGCCAACCTGG  
GGCTCTCCTGGGAGACGATCAGATCTATAACGTGATCGTTACCGCACACGCCTTTGT  
AATAATCTTCTTTATAGTAATACCAATTATGATTGGAGGATTTGGGAACTGACTTAT  
CCCTCTAATGATCGGGGCCCTGACATGGCTTTCCCCCGGATAAACAACATGAGTTT  
CTGACTTTTACCCCCATCTTTTCTCCTTCTCTTAGCCTCTTCAGGCGTAGAAGCCGGG  
GCTGGGACTGGGTGAACCGTATATCCTCCGCTGGCTGGAAATTTAGCACACGCCGG  
AGCGTCCGTAGACCTCACAATCTTCTCCCTTCACCTTGCCGGGATTTTCATCAATCCTG  
GGGGCAATCAACTTTATTACCACCATTATCAATATGAAACCTACAGCGGTTACTATA  
TACCAAATTCCACTATTTCGTGTGGGCAGTACTAATCACAGCCGTTCTTCTTCTCCTTT  
CCCTTCCAGTCTTAGCCGCTGGCATCACAAATGCTGCTCACAGACCGTAACCTAAACA  
CAACTTTCTTTGACCCCGCCGGAGGAGGTGACCCCATCCTCTATCAACACCTATTCT  
GATTCTTTGGCCACCCAGAGGTATACATTTTAATTCTTCCCGGCTTCGGAATGATTC  
CCACATTGTTGCATACTATGCAGGTAAGAAAGAACCTTTGGCTACATGGGCATAGT  
CTGGGCTATGATAGCTATCGGACTGCTGGGCTTCATCGTATGGGCCCATCACATGTT  
TACGGTTGGAATAGATGTGGACACACGAGCCTACTTTACTTCTGCCACAATGATTAT  
CGCCATCCCAACAGGCGTTAAAGTCTTTAGCTGACTCGCAACCCTTCATGGAGGAAG  
CATTAAATGAGAAACCCCGCTTCTGTGGGCTCTCGGCTTCATTTTCTATTACAGTA  
GGCGGCCTTACTGGTATTGTTTTAGCTAACTCCTCTCTAGACATCGTTCTTCACGACA  
CATACTATGTAGTAGCCCACTTCCACTATGTACTATCTATGGGTGCTGTGTTTGCAAT  
CGTTGCCGCCTTCGTACACTGATTCCCCCTTTTTACAGGATATACCCTTCACTCCGCA  
TGAACAAAAATCCACTTTGGCCTTATATTTGTAGGAGTTAATCTTACATTCTTCCCCC  
AGCACTTCCTTGGCCTGGCCGGAATGCCTCGACGGTACTCGGACTACCCAGATGCAT  
ACACCCTTTGAAATACTGTCTCATCGATCGGGTCACTAATGTCCCTCGTCGCTGTGAT  
TTTATTTTTGTTTATTATTTGAGAAGCATTACAGCCAAACGAGAAGTCGGAGCAGT  
AGAATTAACCTCAACTAATATTGAATGACTTTACGGCTGCCCCCACCCTACCACAC  
ATTTGAGGAGCCCGCATTCGTTCAAGTTCGTATAAACTAAATGGCACATCCGTCACA  
ACTGGGGTTTCAGGACGCAGCTTCCCCCTAATAGAAGAACTACTTCACTTCCACGA  
TCACGCCTTAATAATTGTCATTCTCATCAGCGCAATAGTGCTTTATATTATTGTGGCA  
ATGGTCACGGCCAACTAACCAGACAACTTGTATTAGATTCTCAAGAAATTGAAGT  
AATCTGGACAGTTCTCCAGCTATTATCCTAATTCTCATCGCCCTGCCGTCTCTCCGC  
ATTTTATACTTAATGGACGAAATTAACGACCCCCACCTAACAAATCAAAGCCTTAGGC  
CACCAATGATACTGAAGCTACGAATATACAGACTACCAAGACCTTGGTTTTGACTCC  
TATATGATTCCAACACAAGACCTAACCCTGGGCAATTCCGACTGCTTGAAGCAGAC  
CACCGAATGGTAATTCCCGTCGAATCCCAATTTCGAGTCCTTATTTACAGCTGAAGAT  
GTCTTACATTCTGAGCAGTCCCCTCGCTCGGCGTAAAAGTTGATGCTGTGCCTGGC  
CGATTAAACCAAGCAACCTTTATTGTTAGCCGACCGGGCGTCTTCTACGGCCAATGC  
TCTGAGATTTGCGGGGCGAACCATAGTTTTATACCCGTGTTGTAGAAGCAGTCCCA  
CTTGACCACTTTGAAGACTGGTCTTCGCTAATAATTGAAGACGCCTATGGCCCCCTCA  
AGCGCACCCGTACCACATAGTTGACCCTAGCCCATGACCCCTCACGGGGGGCTATCGC  
TGCCCTATTGATAACATCTGGCCTTGCTATCTGATTCCACTTCCACTCTACCACCCTA  
ATAACTATTGGGACAATTCTTCTTACTTTAACAGTCTTCCAGTGATGACGAGATGTT  
ATTCGAGAAGGAACATTTCAAGGACACCACACCCCTCCGGTTCAAAAAGGCCTCCG  
ATACGGTATAATCCTTTTTATTACCTCAGAAGTCCTATTTTTCTTAGGCTTCTTCTGG  
GCTTTTTTACCCTCAAGCCTCGCACCAACCCCGAGCTAGGGGGTTTCTGACCCCCC  
GCAGGTATTACCCCTCTAGACCCATTTGAAGTCCCACTTCTTAACACAGCAGTACTG  
CTTGCTCTGGCGTAACTGTTACATGAGCACACCACAGCATTATGGAGGGTGAACGA

AAACAAGCTATCCAATCTCTTGCTCTCACAATCTTACTCGGGGGGTACTTCACCTTCC  
TACAAGGCCTTGAATACCAACGAAGCTCCATTACCATTTGCAGACGGAGTGTACGGT  
GCCACATTCTTTGTTGCCACTGGCTTCCACGGACTTCACGTTTTAATTGGCACCTCTT  
TCTTAGCCGTTTGTCTGTTACGCCAAGTACTTCACCACTTTACATCCGACCACCATTT  
TGGCTTTGAGGCAGCCGCATGATACTGACACTTTGTAGACGTTGTCTGACTCTTCCTC  
TATATCTCTATCTACTGATGAGGATCTTAATGGCCAATCTCCGTAAATCCCACCCCCT  
TCTTAAAATCGCAAATGATGCTGTAGTGGACCTCCCAGCCCCCTCCAACATCTCTGT  
CTGATGAAACTTCGGGTCTCTCTTGGGGCTCTGCTTAGTAACCTCAGATCGCTACCGG  
CTTATTCTTAGCCATACACTACACATCAGATATTGCTACTGCCTTCACATCCGTTGCA  
CACATCTGTCGAGATGTAACTACGGCTGACTTATCCGAAGCATTTCATGCCAATGGC  
GCATCATTCTTTTTTCATTTGCATTTACCTTCACATCGGCCGTGGTCTCTACTATGGTTC  
CTACCTTTATAAAGAAACATGAACTATCGGTGTTGTACTTCTCCTCCTCGTAATAATG  
ACCGCTTTCGTTGGATACGTCCTCCCTTGAGGACAAATGTCATTTTGAGGTGCAACC  
GTCATTACCAACCTTCTGTCTGCAGTCCCCATGTTGGGGGCTCCCTCGTCCAATGAA  
TCTGAGGCGGCTTTTCTGTAGATAACGCCACACTCACCCGCTTCTTTGCATTCCACTT  
CCTTTTCCCCTTCATTATCGCAGCCGCCACAGTAATTCATCTACTTTTCTCCTCCACGAG  
ACTGGCTCAAACAACCCCAACCGGATTAACTCAAACCTCCGATAAAGTCCCATTTCCAC  
CCCTACTTCACATACAAAGACCTTTTGGCTTTGCAGTCCTTCTTACAGCCCCTGGCCTC  
CCTTGCCCTATTCTCCCCAACCTTCTAGGAGATCCTGACAACTTTACTCCTGCAAAC  
CCACTTGTTACACCCCCACACATTAAGCCAGAGTGATATTTCTTATTTGCCTACGCCA  
TTCTCCGCTCCATCCCAAACAAGCTTGGGGGTGTACTTGCCCTTTTATTCTCCATCCT  
AGTCCTTATACTTGTCCCCTTCCTACACACTTCCAAACAACGTAGTCTCATGTTCCGC  
CCTGTAACACAGTTTTTGTCTGATCCTTAGTAGCTGACGTAATAATTCTGACTTGAA  
TTGGAGGAATACCCGTAGAGCACCTTTTGTAAATCATTGGTCAAGTAGCATCTCTTA  
TTACTTCTCCCTCTTCCTAGTCCTTATTCCAACAGCAGGTTGAATGGAAAACAAAGT  
CCTTGGATGAACTATGATTTCAACCCTCATTACGCATATTATTAACCCACTAGCCTT  
TATTGTACCCGTCTTGTTAGCCGTAGCATTCTTAACCCTCCTTGAACGAAAAGTGCT  
AGGCTACATGCAACTACGAAAAGGTCCTAACATCGTTGGGCCTTACGGCCTCCTTCA  
ACCTATTGCTGACGGCGTAAAACCTTTTCATCAAGGAACCCGTTGCGCCTTCAACCTC  
CTCACCAGTCTTATTCCTTTTATCACCCATACTCGCACTTACCCTAGCCCTTGCACTC  
TGAGCACCTATACCCTTCCCGTACCCTGTCGTAGACCTTAACCTCGGTATTTTGTTTA  
TTCTAGCCCTATCTAGCCTTGCAGTATACTCCATCCTCGGGTCAGGCTGAGCATCCA  
ATTCAAAATATGCTCTAATGGGAGCACTCCGTGCTGTTGCACAAACAATTTCTTACG  
AAGTTAGCCTTGGTCTCATCTTACTCAGCATCATTATCTTTGCAGGAGGCTTCACACT  
CCAAACCTTCAACACAGCCCAAGAAGCTATCTGACTAGTAGTACCTGCATGACCCCT  
GGCTGCCATATGATACATCTCCACCCTCGCCGAAACAACCGTGACCCCTTCGACCT  
AACAGAGGGGGAGTCTGAACTCGTCTCAGGCTTCAACGTAGAGTACGCAGGAGGGC  
CCTTCGCTTTGTTCTTTTTTGGCCGAATATTCAAATATTCTCCTAATAAACACACTGTC  
CGCAACACTATTTTTAGGCGCTTCACACATTCCAAACATCCCAGAATTAACAAGCAT  
CAACTTGATAACTAAAGCAGCCCTCCTATCAGTTGTTTTTCTCTGAGTCCGAGCTTCG  
TACCCGCGGTTCCGTTACGACCAACTTATGCACCTTATTTGAAAAAATTTTCTCCCAC  
TAACACTGGCGCTGGTTATTTGACACTTAGCGCTCCCTATTGCATTTCGCTGGCCTTCC  
ACCTCAGCTGTAAATGAACCCCTACATCTTGTCCACCCTTCTATTTGGTTTGGGCCTA  
GGTACAACACTCACATTTGCAAGCTCACACTGGCTTCTCGCATGAATGGGCCTTGAG  
ATTAATACACTAGCCATTGTCCCACTAATAGCCCAACATAATCACCCCTCGGGCAGTC  
GAAGCCACTACTAAATACTTCTGGCACAAGCCACAGCAGCCGCCACTCTCCTGTTT  
GCAAGCACCAACGCTTGAATCACCGGCCAATGAGATATTCAACAGATAACCCA  
CCCCTCCCCACAACCATAGTTGTAATTGCTCTAGCACTAAAAATCGGACTAGCACC  
TATACACTCTTGACTTCCCGAAGTCCTTCAGGGCTTAAACCTCACCACTGGTCTTATT  
TTGTCAACCTGACAAAAGCTTGCACCATTTGCCCTATTGCTACAAATTCAAACAACA  
ACCCACCCCTCTAATCATCATTGGCCTTCTCTCTGCCCTTATTGGCGGCTGAGGTGG  
CCTCAACCAAACCTCAGCTACGCAAAGTCCTTGCCTACTCCTCAATCGCTCACCTTGG

CTGAATAATACTTATTCTTCAATTTTTCACCTCTCCTGAGCCTCCTTGCACTCCTGACA  
TATCTTCTATGACCTTCTCAGCCTTCCTTATCTTCAAAGTAAACAAAGCCACTACCGT  
TAATGCACTCGCAATCTCTTGAGCCAAAACCTCCCGCCCTTACAGCCCTCGCACCCCT  
TGTTTTACTCTCCCTCGGAGGCCTCCCACCACTAACAGGCTTCATACCAAAATGATTT  
ATTCTTCAAGAACTCACTAAACAAGACCTGCCACACTTGCTACCCTCGCTGCATTAA  
CCGCACTCTTAAGCCTCTACTTCTACCTCCGACTCTCATATGCTATGACCCTAACAAAT  
ATTCCCAATAACCTCATTGGCATGACCCCTGACGATTCTCCACCCCCCAATTCAC  
CCTTCCCTCGCCATTTCCACTGCGGCAACTACGCTTCTCCTCCCATTAGCACCTGCT  
GCCGTAGCTCTCCTCATAGCCTATGAGCCTTCTTCTAACCATCATTTCAATTACCGCC  
CTCCTCTCAACAGTTCTTGCCATTGTATCCTTTTGACTCCCCCAAATTACACCAGACT  
ATGAAAACTGTCACCATACGAGTGTGGCTTTGACCCCATTTGGTTCCGCCCCGACTAC  
CTTTCTCAATGCGATTTTTTCTCATCGCTATCCTCTTTCTTCTCTTCGACTTAGAAATT  
GCCCTTCTCCTCCCTCTCCCCTGAGGTGATCAATTGACATCCCCCTACTTACATTTA  
CCTGAGCCACAGTGGTTCTATCACTCCTAACCCCTGGCCTCATCTATGAGTGAGTGC  
AAGGAGGCCTAGAATGGGCTGAATATGCTAAAAATTCTAATCCCAACACTTATGCT  
AATTCCAACAGCCTGACTACTTAAACCTAGCTGGCTTTGACTCATAACTCTGTTATAT  
AGCTTTTGCATCTCCCTAGCTAGCCTTTCATGATTAAAGAACCTCTCGGAAACCGGC  
TGAACCTCACTCAACCTATTTATAGCCACCGACTCCTTGTCAACACCACTTCTCGTTC  
TAACATGTTGACTACTTCCCCTAATAATCTTGGCAAGCCAAAAACACACAGCCTCAG  
AGCCCCTGAATCGGCAGCGCATATACATCTCACTTCTCGCCTCCTCCAGTTTTTCTG  
ATCCTAGCATTACAGCGCCACAGAACTAGTAATGTTCTACGTAATATTTGAAGCTACC  
CTTATCCCCACACTGATTATTATTACCCGCTGAGGTAACCAAACAGAGCGCCTAAAC  
GCAGGAACCTACTTCCCTCTTTTATACACTAGCAGGCTCACTTCCCCTTCTTGTTGCCT  
TACTCTTACTCCAAAATACATCCGGAACCTCTCTCATTATTAACACTCCACTATACAG  
ACCCACTTGCTGTCATCCTATGCAGACAAATTATGGTGAGCCGGATGTCTGCTAGCT  
TTCCTGGTTAAATAACCACTTTACGGTGTTCACCTGTGACTTCCAAAAGCACACGTT  
GAAGCCCCAATTGCAGGCTCAATAATTTTTGCAGCAGTTTTGCTTAAGCTGGGAGGT  
TACGGCATAATCCGCATAATAACAATACTAGAGCCCCTAACTAAAGAACTAAGCTA  
CCCATTCAATTATCTTCGCACTTTGAGGTGTAATCATAACTGGCTCAATTTGTCTACGA  
CAAACCGACCTTAAGTCGTTAATTGCCTATTCCTCTGTTAGCCACATGGGCCTCGTA  
GCCGGAGGAATTCTCATTCAATCCCCCTGAGGTCTACGGGGGCACTAACACTTATG  
ATTGCTCACGGCCTTACCTCCTCAGCCCTATTCTGCCTAGCAAATACAAACTATGAG  
CGGACTCACAGCCGCACAATAGTTTTGGCACGAGGACTGCAAGTAGCACTGCCCCT  
AATAGCCACCTGATGATTTCGTTTCAAGTCTAGCCAACCTAGCCCTACCACCACTACC  
CAACCTCATGGGGGAGCTAATAATTATCACCTCCCTCTTTGACTGATCCTGGTGAAC  
GCTCGCACTAACAGGGTCCGGAACCCTCATTACCGCTGGCTACAGCCTCTATATGTT  
CTTAATAACTCAACGAGGCCCTCTCCCAACACATGTGATTGCACTTGAACCCTCACA  
CACCCGAGAACATCTCCTTATTGCCTTCACCTTATTCCTCTTGTGCTTCTCGTACTTA  
AACCCGAGCTGATCTGAGGCTGAACTGCCTATGACCCCAACACACTTTGCCTTCTCC  
TCAGCCTTTTTTCTAGGTTCAACAGGCCTGGCATTCCACCGGTCCCACCTCCTTTCCG  
CACTACTGTGCCTTGAAGGTATAATACTGTCCCTATTTATTGGCCTTTCCCTCTGAAC  
GCTGCAACTAGACTCAACCAACTTTTCAGCATCCCCGCTACTTCTACTCGCATTTTCA  
GCCTGTGAAGCAAGCGCCGGGCTCGCTCTTCTGGCAGCCACTGCCCGAACCACGG  
AACTGACCGACTACAAAGCTTAAACCTCCTCCAATGCTAAATGCACCCACCTCCCT  
AATGATCTCATCAAGCTTGATTACAATCTTTGCATTACTAGCCTACCCCTGGCCACC  
ACCTTTTCGTCTACACCTCAGGGGCCTCAATGAGCTACATCTCATGTCAAAACAGCT  
GTAAAGATAGCTTTCTTTGTTAGCCTCCTGCCCCTCGCCCTATTCTTAATGAGGGGG  
CCGAGACAATTGTTACTAACTGAGCCTGAATAAACACTAACACCTTCAACATCAACA  
TTAGCCTTAAATTTGACTTTTATTCCATTATTTTTACACCAATTGCCCTCTACGTTACT  
TGATCCATTCTGGAGTTCGCCTCATGATACATACACGCTGACCCACACGTAAACCGC  
TTTCTTAAGTACCTTCTAACCTTTCTTATTGCCATAATCATCCTAGTAACTGCAAACA  
ATATATTTCAACTCTTTATTGGCTGAGAGGGCGTAGGGATCATGTCCTTCCTCCTCAT

CGGGTGATGATACGGACGCGCAGACGCCAATACTGCAGCACTTCAAGCAGTACTAT  
ATAACCGAGTCGGAGACATCGGACTAATCTTCGCCATAGCTTGAATAGCAACAAAC  
CTGAACTCCTGAGAAATACAACAAATCTTCGCAACTTCTAAAGACATGGACTTAACA  
TATCCCCTCATTGGGCTAATCATCGCAGCAACCGGGAAGTCAGCTCAATTTGGGCTC  
CACCTTGGTTACCATCGGCCATGGAAGGTCCTACACCGGTATCTGCCCTACTTCAT  
TCTAGCACAATAGTCGTGGCCGGCATCTTCCTGCTGGTACGAATGAGCCCCTTCTG  
GAAAACAACCCAATTGCCCTAACAACTGTCTCTGTCTCGGAGCCCTCACAACCCTA  
TTCCTGCAACCTGCGCTTTAACACAAAATGACATTAATAAAAAATCGTCGCATTTTCT  
ACATCCAGCCAGCTTGGACTCATGATAGTAACCATCGGACTAAACCAACCACAACCT  
AGCATTTCTACACATCTGTACACACGCCTTCTTTAAAGCCATACTATTTCTTTGCTCA  
GGGTCTATTATTCATAGCCTCAACGACGAGCAAGACATCCGAAAAATGGGAGGCAT  
ACACCACCTTGCGCCCTTTACATCATCTTGTTTAAACAATCGGGAGCCTCGCACTTAC  
GGGCACCCCTTCTTAGCTGGTTTCTTCTCTAAAGATGCCATCATCGAAGCATTAAA  
CACCTCCCATTAAACGCCTGAGCCCTAACCCCTACCCTCCTGGCCACCTCTTTTACA  
GCAATCTACAGCTTCCGTGTAGTCTTCTTTGTGCCTATAGGCCACCCCGATTAAACC  
CATATCCCCTATCAACGAAAACAACCCCGCAGTAATTAACCCACTTAAGCGCCTGGC  
ATGGGGGAGTATCATTGCAGGACTCCTAATTACCTCAAATATCACACCCCTAAAAAC  
CCCAGTGATGTCCATGCCTCCCCTCCTAAAACCTAGCTGCCCTTGCAGTTACAATCAT  
CGGCCTACTTGTGCCATAGAACTTGCCATGTAAACCAACAAACAATTTAAATCAAC  
CCCTATCTTAACGTACACAACCTTCTCTAATATGCTAGGCTTTTTCCCTGCCATTGTAC  
ACCGACTAACCCCTAAACTAGGCCTCGTTCTCGGCCAAGACATCGCCAACCAAATA  
GTGGATCAAACCTGATTAGAGAAAGCAGGCCCCCAAAGCCGTTGTATCTTTCAACCTC  
CCACTAGTCTCTACAGCAAGCAACATCCAACGAGGAATAATCAAAACCTATCTGCC  
CTCTTCCTTTTAAACACTCGCCCTTATTGTGCAACGTCCTCGCACAAATGGCTTTTGT  
TATATATTTTATTTTATTTTCTTCGTGCTGGGGTTAGTTGCAGTTGCTTCTAATCCAT  
CCCCCTACTATGCCGCTTACGGCTTAGTTGTGGTAGCTGGGATGGGGTGTAGTGTGT  
TAATTGGGCATGGGGCTCCTTTCTTATTTATAATTCTATTCTAATTTATCTGGGCGG  
GATGTTGGTTGTGTTTGCATTCGCAGTAGCGATAGCTTCTGAGCCGCATCCGGTTGG  
TTGAAATTCTTGGGCAGTATTGGGTTACGCTTGTTTACATGGCAGCTACCGTGCAGT  
TGCGGGGGTACTTCGAGGGGGATGGTATGAGTCGTCTTGGGTGACAGTAGATGGAT  
TTGGGGGAGACTGAGCTGTTTCGGGGTGATCTCGGTGGGGTGGCCATGGTATATGGTT  
CTGGGGGAGGGCTTCTAGTTATTAGTGCGGGGGTATTGCTTTTAAACGCTTTTTGTGGT  
CCTTGAGTTAGCCGGCCCATGTGCCGAGGGACGTTGCGACAATAA

Hippoglossoides\_platessoides\_MN122825

ATGATACTAAGCTTCTTTGACCAATTTATGTCTCCCGTATTCCCTTGGCATCCCCCTAA  
TTGCCCTAGCAATTACACTGCCCTGAACCCTATTCCCTGCCCTGTCTTCGCTGATTA  
AACAACCGTATAGTCTCACTTCAAGGGTGGTTTATTAGCGGCTTTACGTCTCAACTT  
CTTCTCCCCCTAAATCCAGCCGGGCACAAATGAGCGATTTTGTTCGCCTCACTAATC  
TTTTCTTTTTCTATTAACATGCTCGGACTCCTTCCGTATACATTTACACCTACAACCTC  
AACTCTCGCTTAACCTCGGCCTTGCAGTCCCACTCTGACTGGCAACTGTCATTATGGT  
ATACGGAACCAACCAACAGTCGCACTAGGCCACCTTCTTCCAGAAGGGACTCCAC  
CCCTCTCATCCCGGTACTAATTATTATCGAAACAATTAGCCTCTTTATCCGACCTCTC  
GCTCTCGGTGTTTCGGCTTACAGCAAATCTTACAGCTGGCCACCTGCTCATCCAACCTC  
ATTGCAACAGCTGCCTTCGTTCTTCTTCCGCTTATGCCTGTTGTTGCTATTTTAAACA  
CAACAGTTCTCTTTCTCCTCACTCTCCTAGAAAGTTGCAGTTGCTATAATTCAAGCCTA  
TGTCTTTGTTTTACTACTAAGCCTTTACCTACAAGAGAACGTCTAATGCCCAACTGG  
ACCCCGCACCCCTGATTTGCAATTTTGGTTTTCTCTTGAATAATCCTTTTAACTGTTATT  
CCCCAAAAGTTTTAGCTCACACTTACCCAAATGAGCCAACCTCCCAAAGCACACAA  
AAACAAAACAGAACCCTGAAACTGACCATGATACTAAGTGGCAATCACACGTTGAT  
TTTTCTCGACCAATCACAAAGACATCGGCACCCTCTATCTCGTATTTGGTGCCTGAG  
CCGGAATAGTGGGGACAGGCCTAAGTCTGCTCATTCGAGCAGAACTCAGCCAACCC  
GGGGCTCTCCTGGGAGACGATCAAATTTATAACGTGATCGTTACCGCACACGCCTTT

GTAATAATCTTCTTTATAGTAATACCAATTATGATCGGAGGGTTCGGAAACTGACTT  
ATCCCACTAATGATCGGAGCCCCTGATATGGCTTTCCTTCGGATAAATAACATGAGC  
TTCTGACTTCTACCCCCATCATTTCTTCTCCTCTTGGCCTCTTCAGGCGTAGAAGCCG  
GGGCTGGTACTGGTTGAACCGTGTATCCTCCCCTTGCTGGAAATCTGGCACACGCCG  
GAGCGTCCGTAGATCTCACAATTTTCTCTCTTCACCTTGCCGGAATTCATCAATCCT  
GGGAGCAATCAACTTTATTACCACCATCATCAACATGAAACCTACGGCGGTCACTAT  
ATACCAAATCCCCTATTTCGTGTGAGCCGTACTAATTACGGCAGTTCTTCTTCTCCTT  
TCCCTTCCGGTCTTAGCCGCTGGCATCACAATGCTACTAACAGACCGCAACCTAAAC  
ACAACCTTTCTTTGACCCTGCCGGAGGGGGTGATCCCATCCTCTACCAGCATCTATTTT  
GATTCTTTGGTCACCCAGAGGTATACATTTTAATTCTTCTGCTTCGGAATGATTTTC  
TCACATTGTTGCATACTATGCAGGTAAGAAAGAACCCTTCGGCTACATAGGAATAGT  
CTGGGCTATGATAGCTATTGGACTTCTGGGCTTCATCGTATGGGCCCATCACATGTTT  
ACAGTTGGTATGGATGTGGACACACGTGCCTACTTTACTTCTGCCACAATAATTATT  
GCCATCCCAACCGGCGTAAAAGTCTTTAGCTGACTCGCAACCCTCCATGGGGGAAG  
CATCAAGTGAGAAACCCCGCTTCTGTGGGCTCTAGGCTTTATTTTCTATTACAGTG  
GGGGGCCTTACTGGCATTGTCTTAGCTAATTCCTCTCTCGACATCGTTCTCCATGACA  
CATACTATGTAGTAGCCCACTTCCATTATGTACTATCTATGGGTGCTGTATTTGCAAT  
CGTTGCTGCCTTCGTACACTGATTCCCCCTATTACAGGCTACACCCTTCACTCCGCA  
TGAACAAAAATCCACTTTGGCCTAATGTTTGTAGGAGTTAACCTCACATTCTTCCCC  
CAGCATTTTCTTGGCCTGGCCGGAATACCTCGACGGTACTCCGACTACCCGGATGCA  
TATACCCTTTGAAACACTGTCTCATCAATCGGGTCACTAATGTCCCTCGTTGCTGTAA  
TTTTATTTTGTATTATTATTTGAGAAGCATTTACAGCCAAACGAGAAGTCGGAGCAG  
TAGAACTTACTTCAACTAATATTGAATGACTTTACGGCTGCCCCCACCCTACCACA  
CATTTGAGGAGCCCGCATTCGTCCAAGTTCGTATAAACTAAATGGCACATCCGTCAC  
AACTGGGGTTTCAGGACGCAGCTTCCCCCCTAATAGAAGAACTACTTCACTTCCATG  
ATCACGCCTTAATAAATTGTTATTCTCATCAGCGCAATAGTACTTTATATTATTGTGGC  
AATGGTCACGGCCAACTAACCGACAACTTGTCTTAGATTCTCAAGAAATTGAAGT  
AATCTGGACAGTTCTCCCAGCTATTATTCTAATTCTCATCGCCCTCCCGTCTCTCCGC  
ATTTTATATTTAATGGACGAAATTAACGACCCCCACCTAACAATTAAGCGTTAGGC  
CACCAATGATACTGAAGCTACGAATACACAGACTACCAAGACCTTGGTTTTTGACTCC  
TACATGATTCCAACACAAGACCTAACCCTGGTTCAGTTCCGACTACTCGAAGCAGAC  
CATCGAATAGTAATTCCTGTAGAATCCCCAATTCGAGTCCTTATCTCAGCTGAAGAT  
GTTCTGCACTCCTGAGCAGTCCCCCTCCCTGGGCGTGAAAGTTGATGCTGTGCCTGGA  
CGACTAAACCAAGCAACCTTTATTGTTAGCCGACCAGGCGTATTCTACGGCCAATGC  
TCTGAGATTTGCGGGGCAAACCATAGTTTTATACCCGTCGTTGTAGAGGCAGTCCCA  
CTTGACCCTTTGAGGACTGGTCTTCGCTAATAATTGAAGACGCCTATGGCCCCTCA  
AGCGCACCCCTACCATATAGTCGACCCTAGCCCATGACCCCTCACGGGGGCTATCGC  
TGCCCTATTGATAACATCTGGCCTTGCTATCTGATTCCACTTCCACTCTACCACCCTA  
ATAACTATCGGAACAATCCTTCTTATTTTGACAGTCTTCCAGTGATGACGAGATGTC  
GTTCTGGGAGGGCACGTTTCAAGGACACCACACTCCCCCGGTACAAAAAGGCCTCCG  
ATACGGTATAATCCTATTTATTACCTCAGAAGTCCTATTTTCTTAGGCTTCTTCTGG  
GCTTTTTTACCCTCAAGCCTAGCACCTACCCCCGACCTGGGCGGTTTCTGACCACCC  
GCAGGCATTACCCCATTAGACCCGTTTGAAGTCCCCTTCTTAACACAGCAGTCCTT  
CTTGCCTCTGGCGTAACTGTTACATGAGCACATCACAGTATCATAGAAGGTGAGCGA  
AAACAAGCTATCCAATCTCTCGCTCTTACAATCTTGCTCGGTGGATACTTCACCTTCC  
TCCAAGGCCTTGAATACCACGAAGCCCCCTTACCATTGCAGACGGAGTTTACGGTG  
CCACATTCTTTGTTGCAACCGGCTTCCACGGACTTCACGTCTTGGTTGGCTCCTCTTT  
TTAGCCGTTTGTCTATTACGTCAAATCCTACACCATTTTACATCCGACCACCATTTT  
GGCTTTGAGGCAGCCGCATGGTACTGACACTTTGTAGACGTCTGCTGACTCTTCCTC  
TATATCTCTATTTACTGATGAGGATCTTAATGGCCAACCTCCGTAAATCCCACCCCT  
TCTTAAATCGCAAACGATGCTTTAGTCGACCTTCCAGCCCCCTCCAACATCTCTGTC  
TGGTGAACTTCGGGTCTCTCTTAGGACTCTGTTTAGTGACCCAGATCGCTACCGGC

TTATTCTTAGCCATACACTATACATCAGATATTGCTACTGCCTTTACCTCTGTTGCAC  
ACATTTGCCGAGACGTCAACTACGGCTGACTTATCCGAAGCATTTCATGCCAATGGCG  
CATCATTCTTTTTTCATTTGCATTTACCTCCATATCGGCCGTGGCCTATACTATGGCTC  
CTACCTCTATAAGGAGACATGAACTATTGGTGTGTTCTACTTCTTCTAGTAATAATG  
ACCGCTTTCGTTGGATACGTCCTCCCTTGAGGACAAATGTCGTTTTGAGGTGCAACC  
GTCATTACCAACCTTCTGTCTGCGGTCCCCTATGTTGGAGGCTCCCTCGTCCAATGAA  
TTTGGGGCGGCTTTTCTGTAGATAACGCCACCCTTACCCGATTCTTTGCATTCCACTT  
CCTTTTCCCATTTCATCATCGCAGCCGCTACAGTGATTTCATCTACTTTTCCTCCATGAA  
ACTGGTTCAAATAACCCCAACCGGACTAAACTCAAACCTCCGATAAAGTCCCGTTCCAC  
CCTTACTTCACGTACAAAGACCTTCTGGCTTTGCAGTCTTCTTACTGCTCTGGCCTC  
CCTCGCTCTCTTCTCCCCAAATCTTTTAGGAGACCCTGACAACCTTACCCCTGCAAAC  
CCGCTTGTTACACCCCCACACATCAAGCCCGAATGATACTTCCTATTTGCCTACGCC  
ATTCTCCGCTCCATCCCAAACAAGCTTGGAGGCGTACTTGCCCTGCTATTCTCTATCC  
TTGTTCTTATGCTTGTCCCCCTTCCTTCACACTTCCAAACAGCGGAGCCTCATGTTCCG  
CCCTATAACACAGTTTCTGTTCTGGTCTTTAGTAGCTGACGTAATAATTCTGACTTGA  
ATTGGAGGGGATACCCGTAGAGCACCCCTTTCGTTATCATTGGCCAAGTAGCATCCCTT  
ATCTACTTCTCCCTCTTCCTAGTCCTTATCCCAAACAGCAGGCTGAATGGAAAACAAA  
GTCCTCGGATGAACTATGATTTCAACCCTCATTACGCATATTATTAACCCACTAGC  
CTTTATTGTCCCGGTCTTGTTAGCCGTAGCATTCCCTACCCTCCTTGAACGAAAAGTG  
CTAGGCTACATACAACTCCGAAAAGGTCCTAACATCGTTGGGCCTTACGGCCTCCTT  
CAACCTATTGCTGACGGCGTAAACTCTTCATTAAAGAACCCGTCCGTCCCTTCGACC  
TCCTCACCAGTTTTATTCTCTTATCACCCATGCTCGCACTTACACTGGCTCTTGCAC  
TTTGAGCCCCCTATACCTTTCCCGTACCCCGTCGTGGACCTTAACCTAGGCATTTTATT  
TATTCTAGCCCTGTCTAGCCTTGCGGTATACTCCATCCTCGGGTCAGGCTGAGCATCT  
AATTCAAATATGCTCTAATGGGGGCACTGCGTGCTGTTGCACAAACAATTTCTTAC  
GAAGTTAGCCTGGGGCTCATCTTACTCAGCATCATTATCTTTGCAGGAGGCTTCACC  
CTCCAAACCTTTAATACAGCCCAAGAAGCTATTTGACTGGTAGTACCCGCCTGACCG  
CTCGCCGCCATGTGATACATCTCCACCCTTGCCGAAACAAACCGTGCACCCTTCGAT  
CTAACGGAGGGGGGAGTCTGAACTCGTCTCGGGCTTCAACGTAGAGTACGCAGGAGG  
ACCTTTTCGCTTTGTTCTTTTTAGCCGAATATTCAAACATTCTCCTAATAAATACTG  
TCGCAACACTATTTTTAGGGCGCCTCACACATCCCAAACATCCCAGAACTAACAAGT  
ATTAACCTAATAACTAAAGCAGCCCTTCTATCCGTTGTTTTTCTCTGAGTCCGAGCCT  
CGTACCCACGATTCCGTTACGACCAGCTTATGCACCTCATTTGAAAAAACTTTCTTCC  
ATTAACACTGGCCCTGGTTATTTGACACTTAGCGCTCCCTATTGCATTTCGCTGGCCTC  
CCACCTCAGCTGTAGATGAACCCCTACATCTTGTCCACCCTTCTATTTGGTTTGGGCC  
TAGGTACAACACTCACATTTGCAAGCTCGCACTGACTTCTCGCGTGAATGGGCCTTG  
AGATTAATACTAGCCATTATCCCACTAATAGCGCAACACCACCACCCTCGGGCTG  
TCGAAGCCACTACTAAATACTTCCTAGCACAAGCCACAGCAGCCGCCACCCTCCTAT  
TTGCAAGCACCACCAACGCTTGGATCACCGGCCAGTGAGATATTCAACAAATAACG  
CACCCCTCCCCACGACAATGGTTGTAATTGCCCTCGCACTAAAAATCGGACTAGCA  
CCTATACACTCTTGACTCCCCGAAGTTCTTCAGGGCCTAAGCCTCACCACCGGTCTT  
ATTTTGTCAACCTGACAAAAGCTTGCACCTTTTGCTCTGCTACTACAAATTCAAACA  
ACAATCCCACCCCTCTGATTATTATTGGCCTTCTCTCTGCACTTGTTGGGGGCTGAGG  
TGGCCTCAACCAAACCCAACTGCGCAAAGTCCTTGCCTATTCTCAATCGCTCACCT  
TGGCTGAATAATACTCATCCTTCAATTCTCACCCCTCCTGAGCCTCCTTGCACCTCCTA  
ACATATTTTCTATGACCTTTTCAGCCTTCTCATCTTCAAGGTAAACAAGGCCACCAC  
TGTCAACGCACTCGCGATCTCCTGAGCAAAAGCTCCCGCCCTCACAGCCCTAGCACC  
TCTCGTCTTACTTTCCCTGGGGGGTCTTCCACCCTAACAGGCTTTATACCAAATGG  
TTTATTCTTCAGGAGCTAACTAAACAAGATCTGCCACGCTTGCTACCCTTGCTGCACT  
AACTGCCCTCTTAAGCCTTTACTTCTACCTACGCCTCTCGTATGCTATGACCCTTACG  
ATATTCCCGAATAACCTCGTTGGCATGACCCCTGACGATTTTCCACCCCCCAATTC  
ACTCTCCCCCTCGCAGTTTCCACTGCAGCAACCACTCTTCTCCTGCCATTAGCACCTG

CTGCCGTAGCACTCCTCGTCACCTATGAGCCTTCTTCTAACCATCATTTCAATTACCA  
CCCTCCTTTCAACGGTACTTGCCATTGTGTCTTTCTGACTCCCCCAAATTACGCCGGA  
CTATGAAAAACTGTCACCATAACGAATGTGGCTTTGACCCCATTTGGTTCCGCCCCGACT  
ACCTTTTTCAATGCGATTTTTTCTCATCGCCATCCTCTTTCTCCTCTTCGACTTAGAAA  
TTGCACTTCTTCTCCCCCTTCCCTGGGGTGACCAACTAGCCTCCCCCTACTTACCTT  
TACCTGAGCTGCAGCAGTCCTATCGCTTCTGACCCTTGGCCTCATCTACGAGTGAGT  
GCAAGGAGGCCTAGAATGAGCTGAATATGCTAAAGATTTTAATTCCAACACTTATGT  
TAATTCCAACAGCCTGACTACTTAAGCCTAGCTGACTTTGACCCATAACTTTATTGTA  
TAGCTTCTGCATCTCCTTGATTAGCCTTTCATGATTAAAGAACCTCTCGGAAACCGG  
CTGATCCTCACTCAACCTATTTATAGCCACCGACTCCTTATCAACACCCCTCCTTGTT  
CTAACATGTTGACTACTTCCCCTGATAATCCTAGCAAGCCAGAAACACACGGCCTCG  
GAACCCCTCGGTGACAGCGCATGTATATTTCACTTCTCGCCTCCTCCAATTTTTCTT  
GATTCTAGCATTTAGCGCCACAGAACTCGTGATATTCTACGTAATATTTGAAGCCAC  
CCTCATTCCCACACTGATCATTATTACCCGCTGAGGTAATCAAACAGAACGCCTAAA  
TGCGGGGACCTACTTCCTCTTTTATACATTAGCAGGCTCACTTCCTCTTCTTGTTGCT  
TTACTTTTACTACAAAATACATCCGGAACCTCTCTCATTATTGACACTCCACTATACGG  
ACCCGCTTGCTGTCATCTTATGCAGACAAATTATGATGAGCCGGATGTCTCCTGGCT  
TTCCTCGTTAAAATACCACTTTATGGTGTTACCTCTGACTCCCTAAAGCTCACGTTG  
AAGCTCCAATTGCAGGCTCAATAATCCTTGACGCGGTTTTACTTAAACTAGGGGGTT  
ACGGCATAATCCGCATAATAACAATACTAGAACCCCTAACCAAAGAGTTAAGCTAC  
CCCTTTATTATCTTTGCACTCTGAGGTGTAATCATAACTGGCTCGATTTGCCTACGAC  
AAACGGACCTCAAGTCGTTAATTGCCTACTCCTCTGTAGCCACATAGGCCTCGTGG  
CCGGAGGGATTCTCATTCAATCACCTGAGGACTGACAGGAGCACTCACACTTATAA  
TTGCACACGGCCTTACTTCCTCCGCCTTATTCTGCCTAGCAAATACAACTATGAAC  
GAACTCATAGCCGCACTATGGTTTTAGCGCGAGGACTTCAAGTGGCCCTACCTCTAA  
TAGCCACTTGATGATTCATCTCGAGTCTAGCCAACCTAGCCTTACCACCACTACCTA  
ACCTTATGGGGGAACATAATAATTATTACCTCTCTTTTTGACTGATCCTGATGAACGCT  
CGCACTTACAGGGTCCGGAACCTTATTACCGCTGGCTACAGCCTTTACATATTCTTA  
ATGACACAACGAGGCCCTCTCCCGACACATGTAATTGCGCTTGAACCCTCGCACACC  
CGAGAACATCTTCTTATTGCCTTCACCTTATCCCTCTTGTTCTTCTTGTTGCTTAAGCCC  
GAGCTGATCTGGGGTTGAACTGCCTATGACCCCAACACACTTTGCCTTCTCCTCAGC  
CTTTTTTCTAGGTTTAAACAGGCCTGGCATTCCACCGGTCCCACCTCCTTTCCGCACTA  
TTGTGTCTTGAAGGAATAATGTTGTCCCTGTTTGTGTTGGCCTCTCCCTGTGAACGCTGC  
AACTAGACTCAACTAACTTTTCAGCATCTCCACTACTTCTGCTTGCATTCTCAGCCTG  
TGAAGCAAGCGCCGGACTAGCCCTTCTGGTAGCCACTGCCCCGAACCCACGGAACCTG  
ACCGACTACAAAGCCTAAACCTCCTCCAATGCTAAATGCACCCACCTCCCTAATGA  
TCTCATCAAGCTTGATTACAATCTTTGCATTACTAGCCTACCCACTGGTCACCACGTT  
CCATCCTACGCCTCGAGGGCCTCAATGAGCTACATCCCATGTCAAAACAGCTGTAAA  
AATAGCTTTCTTTGTTAGCCTCTTACCCCTCGCCCTATTCCTTAATGAAGGCGCCGAG  
ACGATTGTTACTAACTGAGCCTGAATAAACTAACTTTCAACATCAACATTAGC  
TAAAATTTGACTTTTATTTCGATTATTTTTACACCAATTGCTCTTTACGTTACTTGGTC  
CATTCTAGAGTTCGCCTCATGATACATGCACGCTGATCCACACGTGAACCGCTTTTTT  
AAGTACCTTCTAACCTTTCTTATTGCTATAATTATTCTCGTAACTGCAAACAACATAT  
TTCAACTATTTCATCGGATGAGAGGGCGTGGGGATCATATCGTTTCTCCTCATCGGGT  
GGTGGTACGGACGAGCGGACGCTAATACTGCAGCACTTCAAGCAGTACTGTACAAC  
CGAGTGGGGGATATTGGACTTATCTTCGCCATGGCCTGAATGGCAACAAACCTAAA  
CTCCTGGGAAATACAACAAATCTTTGCAACCTCTAAGGATATGGACTTAACCTATCC  
CCTCATCGGACTAATCATCGCGGAACCGGGAAGTCAGCTCAATTTGGGCTCCACCC  
TTGGTTGCCCTCAGCTATGGAAGGTCCTACACCGGTATCTGCCCTACTTCACTCTAGC  
ACTATGGTCGTAGCCGGCATCTTCCTGCTAGTGCGAATAAGCCCGCTTCTGGAGAAT  
AACCCGGTGCCCCTCACAACCTGCCTCTGCCTCGGGGCCTTAACGACCCTGTTCACT  
GCAACCTGTGCCCTTACGCAAAATGACATTAAAAAAATCGTCGCATTTTCTACATCT



AGCCAACTAGGGCTCATAATGGTAACCATTTGGATTAAACCAACCACAACCTAGCATT  
CTACACATCTGTACACACGCCTTCTTTAAAGCCATGCTGTTTCTTTGCTCGGGATCTA  
TTATTCACAGCCTAAACGACGAACAGGACATCCGAAAAATGGGGGGCATAACACCAC  
CTTGACCTTTTACATCTTCTTGCCTAACAATTGGCAGCCTCGCACTTACAGGAACCC  
CCTTCTTAGCTGGTTTCTTCTCTAAAGATGCCATCATCGAAGCATTAAACACCTCCCA  
TTTAAACGCCTGAGCCCTAACCCTAACCCTCCTGGCCACATCTTTTACAGCAATCTA  
CAGCTTCCGCGTAATTTTCTTTGTGCCTATGGGCCACCCCCGATTCAACCCATCTCCC  
CTATTAACGAAAACAACCCCGCAGTAATTAACCCTCTTAAACGCCTAGCATGAGGC  
AGTATTATCGCAGGACTCCTAATTACCTCAAATATTACACCCCTGAAAACCCCTGTA  
ATGTCCATGCCTCCCCTCCTAAAACTAGCTGCCCTTGCAGTTACAATCGTGGGCCTA  
CTTGTTGCCATGGAAGTAGCCATATTAACCAATAAGCAATTTAAATCAACCCCTATC  
TTAACGTACACAACCTTCTCTAACATATTAGGGTTTTTCCCTGCCATTGTACACCGCCT  
AACCCCTAAGCTAGGGCTCGTTCTTGGTCAGGACATCGCCAACCAGATGGTAGATCA  
AACCTGACTAGAGAAGGCAGGTCCCAAAGCCATTGTATCCTTCAATCTACCCTTAGT  
TTCTACAACAAGCAACATTCAACGAGGAATAATCAAAACCTATCTACCCTTTTCCTT  
TTAACTAGCCCTTATTGTGCAACGTCCCTCGCACAATGGCTTTTGTATATATTT  
TATTTTATTTTTCTTCGTGCTAGGGTTAGTTGCAGTTGCTTCTAACCCGTCGCCCTACT  
ATGCCGCTTATGGTTTAGTTGTGGTAGCTGGGATGGGGTGTAGTGTACTAATTGGGC  
ATGGGGCGCCTTTTTTGTCCATGATTTTATTTCTAATTTATCTGGGCGGGATGTTGGT  
TGTATTTGCATTCGCAGTTGCGATGGCTTCTGAGCCGCATCCAGTTGGTTGGAATTCT  
TGGGCTGTGTTGGGTTACGCTTGTTTACATGGCAGCGGTAGTGCAGTTGCTGGGGCG  
CTCTGAGGGGGGTGATATGAATCGTCTTGGGTGACAGTAGATGGGTTTGGGGAGAC  
TGAGGTATTTTCGGGGGGATCTCGGCGGGGTGGCCATGGTTTATGGCTCTGGGGGAG  
GGTTGTTGGTTATTAGTGCAGGGGTATTGCTTTTAACGCTGCTTGTAGTGCTTGAGTT  
AGCCGGCCCATGTGCCGAGGGACGTTGCGACAATAA

Hippoglossus\_hippoglossus\_AM749122

ATGATACTAAGCTTCTTTGACCAATTTATATCCCCTTCATACCTCGGCATTCCACTAA  
TTGCACTAGCGATTAGCCTGCCTTGAATTCTGTTCCCAACCCCTCAAGCCGCTGATTA  
AACAACCGCGTGCTAACACTTCAGGGGTGATTTATTAGCCGCTTCACCTCACAACCTT  
CTTCTACCCCTAAACCCTGGGGGGCCACAAGTGGGCAGTTCTATTACCTCGTTAATG  
TTTTCTTTTCTATCAACATGCTAGGACTCCTTCCATACACCTTCACACCAACAACCC  
AACTCTCCCTTAACATGGGCCTCGCAGTACCCCTTTGATTGGCAACTGTCATTATGG  
GATACGAAATCAACCAACGCATGCCCTAGGCCACCTTCTTCCAGAAGGCACCCCCA  
CTGCCCTCATCCCTGTACTTATTATCATTGAAACAATTAGCCTATTCATTTCGACCCTT  
AGCTCTCGGTGTCCGACTAACAGCAAATCTCACAGCAGGCCACCTCCTTATTCAACT  
CATTGCAACAGCTGCCTTCGTCCTTCTTCCCCTCATACCTGTTGTGCTATCTTAACA  
ACGGTGGTCCTCTTCTCCTCACTCTACTAGAAGTAGCCGTTGCCATGATTCAAGCTT  
ATGTCTTTGTTCTACTCCTAAGCCTATACCTACAAGAGAACGTTTAATGCCTCAACTG  
AACCCCGCACCCCTGATTTGCAATTTTAGTTTTCTCTTGAATAATCTTTTTAACTGTTA  
TTCCCCCAAAGTTTTAGCACACACCTATCCCAATGAACCCACCTCCCAAAGCACAC  
AAAAACAAAACAGAGCCCTGAAACTGACCATGATACTAAGTGGCAATCACACGTTG  
ATTTTTCTCGACCAATCACAAAGACATCGGCACCCTCTATCTCGTATTTGGTGCCTGA  
GCCGGAATAGTGGGGACAGGCCTAAGTCTGCTTATTCGGGCAGAACTAAGCCAACC  
CGGGGCTCTCCTGGGAGACGACCAAATTTATAATGTGATCGTCACCGCACACGCCTT  
TGTAATAATCTTTTTTATAGTAATACCCATTATGATTGGGGGGTTTCGGAAACTGGCTT  
ATTCCACTAATAATTGGGGCCCCAGACATGGCGTTCCCTCGAATGAATAATATGAGT  
TTCTGACTTCTTCCCCCTCCTTTCTCCTCCTCTTAGCCTCTTCAGGTGTTGAAGCCGG  
AGCAGGTACCGGATGAACCGTGTACCCCCCACTAGCTGGCAATTTAGCCCACGCCG  
GGGCATCCGTAGACCTGACAATCTTCTCACTTCACCTTGCAGGAATTTTCATCAATTCT  
GGGGGCAATTAACCTTTATTACTACCATCATTAACATGAAACCCACAACAGTCACTAT  
GTACCAAATCCCGTTATTTGTTTGAGCCGTTCTTATTACAGCCGTACTTCTTCTTCTG  
TCCCTGCCCGTTTTAGCCGCAGGGATTACAATGCTACTAACAGACCGCAACCTTAAC

ACGACCTTCTTTGACCCTGCCGGAGGAGGTGACCCCATTCTCTACCAACACCTATTC  
TGATTCTTTGGCCACCCAGAGGTATACATTCTTATCCTCCCAGGCTTCGGAATAATTT  
CTCACATTGTTGCATACTATGCAGGTAAAGAAAGAACCTTTTGGCTACATGGGGATAG  
TCTGAGCTATAATGGCCATTGGACTCCTGGGCTTCATTGTCTGGGGCCATCACATATT  
TACAGTCGGAATAGACGTAGATACACGAGCCTACTTTACCTCTGCCACAATAATCAT  
TGCGATTCCAACCTGGCGTAAAAGTCTTTAGCTGACTCGCAACCCTCCATGGGGGAAG  
CATTAATGAGAAACGCCCCCTTCTATGAGCCCTCGGCTTTATTTTCTCTTTACAGTA  
GGCGGTCTCACTGGCATTGTCTTAGCTAACTCCTCTCTCGATATTGTTCTGCATGACA  
CATACTATGTAGTCGCCCACTTCCACTATGTACTATCTATGGGTGCTGTATTTGCAAT  
CGTTGCCGCCTTCGTCCATTGATTTCCGTTATTTACAGGCTATACCCTTCACTCCACA  
TGAACAAAAATCCACTTCGGCCTGATGTTTATTGGGGTCAATCTAACATTCTTCCCTC  
AACATTTTCTGGGCCTGGCTGGGATACCCCGACGGTACTCAGACTACCCAGACGCAT  
ACACCCTTTGAAACACTGTTTCATCAATTGGGTCCCTAATGTCCCTCGTTGCTGTAAT  
TTTATTCTTATTCATTATTTGAGAAGCATTACAGCCAAACGAGAAGTCGGAGCAGT  
AGAACTAACTGCAACTAACATTGAATGACTTTACGGCTGCCCTCCCCCTACCACAC  
ATTTGAAGAGCCCGCATTTCGTACAAGTTCGTATAAACTAAATGGCACATCCCTCACA  
ACTCGGATTTCAAGACGCAGCTTCACCCTTAATAGAAGAACTACTTCACTTCCACGA  
CCACGCCTTAATAATTGTAATTCTCATTAGCACAATGGTACTTTATATTATTGCGGCT  
ATAGTCACAGCCAACTAACAGATAAACTTGTACTAGACTCTCAAGAAATTGAAAT  
TATCTGAACAGTTCTCCCAGCTGTTATTCTTATCCTTATCGCCCTACCATCCATCCGA  
ATTTTGTACTTAATAGACGAAATTAATGACCCCCACCTTACAATCAAAGCCATCGGC  
CACCAATGATACTGAAGCTACGAATACACAGACTACGAAGACCTCGGTTTTGACTC  
ATACATAATCCCCACACAAGACCTGACCCCCGGACAATTCCGACTACTAGAAGCAG  
ACCACCGAATAGTAATCCCAGTAGAATCTCCAATTCGCGTTTTAATCTCGGCTGAAG  
ATGTCTTACATTCCTGGGCAGTCCCCTCTCTAGGCGTAAAAGTTGACGCCGTACCTG  
GACGATTGAACCAAGCAACCTTTATTGTTAGCCGACCAGGCGTATTTTTCGGACAAT  
GTTCTGAAATTTGCGGGGCTAACCATAGTTTTATACCCATTGTTGTAGAAGCAGTCC  
CCCTTGAACACTTTGAGAAGTGGTCTTCACTAATAATTGAAGACGCCTATGGCCCAT  
CAAGCACACCCATAACCACATAGTCGACCCCAGCCCATGACCCCTAACAGGGGCTAT  
TGCTGCCCTATTGATAACATCTGGCCTTGCTATCTGATTCCACTTCCACTCCACAACC  
CTAATAACTATTGGGACAATCCTTCTCACCTTAACAATCTTCCAATGATGACGGGAC  
GTCGTACGAGAAGGCACATTTCAAGGACACCACACTCCCCCGTTCAAAAAGGCCT  
CCGATATGGGATAATTTTATTTATTACCTCAGAAGTCCTATTCTTCTTAGGCTTCTTC  
TGAGCCTTTTACCCTCAAGCCTAGCACCTACCCCTGAGCTAGGCGGCTTCTGACCA  
CCAGCAGGCATTACTCCCTTAGACCCATTTGAAGTCCCCTTCTTAACACAGCAGTC  
CTGCTCGCCTCTGGCGTAACTGTTACCTGAGCACATCACAGCATTATGGAGGGTAAA  
CGAAAACAACTATTCAATCTCTTGCTCTTACAATCTTACTCGGGGGGTACTTCACTT  
TCCTTCAAGGCCTAGAGTATCACGAAGCCCCCTTCACCATTGCAGACGGAGTTTACG  
GCGCTACATTCTTTGTTGCCACCGGCTTCACGGATTACACGTCTTAATTGGCACATC  
ATTCTTAGCCGTTTGTCTATTACGCCAGATTCTTCACCATTTCACATCAAACCACCAC  
TTTGGGTTTGAAGCAGCCGCATGATACTGACACTTCGTAGACGTCGTCTGACTTTTC  
CTCTATATCTCTATTTACTGATGAGGATCTTAATGGCCAGTCTACGTAAATCCCACCC  
TCTTCTAAAAATCGCAAACGATGCTTTAGTCGACCTCCCCGCCCCCTCTAATATCTCG  
GTTTGATGGAACTTTGGGTCTCTTTTAGGACTCTGTTTAATTACCCAAATTGCGACCG  
GCTTATTTCTAGCCATACTACACATCAGACATTGCTACTGCCTTCACCTCCGTGGC  
CCACATCTGTCGAGACGTCAACTACGGCTGACTTATCCGAAGCATTTCATGCCAACGG  
CGCATCATTCCTTTTCATTTGCCTCTACCTTCATATTGGCCGAGGACTATACTATGGC  
TCTTACCTCTATAAAGAAACATGAACTGTTGGGGTTATTCTTCTCCTTCTCGTAATAA  
TAACAGCCTTCGTTGGATACGTCCTCCCTTGAGGACAAATGTCGTTTTGAGGTGCAA  
CCGTTATTACCAACCTTCTATCTGCCGTCCCCTACGTCGGAAACACCCTAGTCCAAT  
GAATCTGAGGGGGTTTTTCTGTAGACAATGCTACCCTCACCCGGTTCTTTGCCTTCCA  
CTTTCTCTTCCCCTTCATCATCGCTGCCGCAACATTAATTCATCTACTCTTTCTTCACG

AGACTGGCTCAAACAACCCACCGGGCTAAACTCAGACTCCGACAAAGTTCCTTTC  
ACCCCTACTTCACTTACAAAGACCTCTTGGCTTTGCAGTACTTCTTACTGCATTAGCA  
TCCCTAGCCCTATTTTCCCCAAATCTCTTAGGAGACCCAGATAACTTTACCCCTGCAA  
ATCCGCTTGTTACTCCCCACACATTAAGCCAGAGTGATACTTCCTGTTTGCCTATGC  
TATTCTACGCTCCATTCCAAACAAACTTGGAGGAGTACTTGCCCTTTTATTCTCCATC  
TTAGTTCTTATGCTCGTCCCTTTCCTTCATACCTCTAAACAACGAAGCCTAATATTCC  
GTCCCCTAACACAATTCTTGTTTTGGTCTTTAGTAGCAGACGTTATGATTCTAACTTG  
AATTGGAGGGGATGCCCCGTAGAACACCCCTTCGTCAATCATTGGACAAGTAGCGTCTCT  
CCTCTACTTCTCCCTCTTCCTAGTCCTGATCCCAACAGCAGGTTGACTAGAGAATAA  
AGTCCTTGGATGAAAATATGATTTCAACTCTCATTACTCATATTATCAACCCACTAA  
CCTTTATTGTGCCTGTATTGCTAGCCGTAGCATTCCCTCACCCCTCCTTGAACGAAAAGT  
GCTAGGCTACATACAACTACGAAAAGGGCCAAACATTGTTGGGCCTTACGGCCTCCT  
TCAACCTATTGCTGATGGCGTAAACTCTTTATTAAAGAACCCATTTCGACCTTCAAC  
CGCATCACCCGTCTATTCCCTCGTGGCCCCCTATGCTCGCTCTCACACTAGCCCTAACC  
CTTTGAGCCCCCATAACCTTTCCTGTACCCTGTCTGGACCTTAACCTAGGTATTTTAT  
TTATTCTAGCTCTATCTAGCCTTGCAGTATATTCTATTCTGGGCTCCGGCTGAGCATC  
TAATTCAAAATATGCCCTAGTAGGGGCACTGCGGGCTGTCGCACAAACGATTTCTTA  
CGAAGTTAGCCTTGGACTCATCTTACTAAACATTATCATCTTCACCGGGGGCTTCAC  
ACTCCAAACCTTTAACACAGCCCAAGAGGCCATTTGACTGGTAGTGCCCGCTTGACC  
GCTGGCTGCCATATGATATATCTCCACTCTTGCCGAAACAAACCGTGCACCCTTCGA  
CTTAACAGAAGGAGAATCTGAACTTGTCTCGGGCTTCAACGTAGAGTACGCAGGGG  
GACCCTTCGCCTTGTTCTTCTTAGCCGAATATTCAAATATTCTCCTAATAAAATACCCT  
GTCCGCTACACTATTTTTAGGGGGCCTCCACATCCCATCTATCCCGGAATTAAGTAGT  
ATTAATATTATGACTAAAGCAGCCCTTCTATCAATTGTCTTCCTGTGGGTCCGGGCTT  
CGTACCCGCGATTCCGTTACGACCAACTTATGCACCTCATTGAAAAAACTTTCTTCC  
ACTGACTTTGGCACTAGTTATCTGACACTTGGCGCTCCCTATTGCATTTCGTGGTCTC  
CCACCACAGCTATAGATGAACCCCTACATCTTGACCACTCTTCTATTTGGTTTGGGCC  
TTGGAACAACACTCACGTTTGCAAGCTCACACTGGCTCCTCGCTTGAATAGGACTTG  
AGATTAATACACTAGCCATTATTCCCCTAATAGCCCAACACCACCACCCCGGGCAG  
TCGAAGCTACTACTAAATACTTTCTCGCACAAGCCACAGCAGCCGCCACCCTCCTGT  
TTGCAAGCACTACCAACGCTTGACTCACAGGCCAGTGGGATATTCAACAGATAACA  
CATCCCCTCCCCACAACAATGATTGTTATTGCCCTCGCGCTAAAGGTCGGACTGGCA  
CCAATGCACTCTTGACTCCCCGAAGTACTCCAAGGGCTAGACCTGACCACCGGGCTC  
ATCCTCTCAACCTGACAAAACTTGACCCCTTTGCCCTCTTACTACAGATTCAGACA  
ACAACCCTACGCCTCTAATCATTATTGGCTTACTATCCACTCTCGTTGGTGGCTGAGG  
TGGTCTCAACCAACCCAGCTGCGCAAGGTCCTCGCCTACTCCTCAATTGCCACCT  
TGGCTGAATAATGCTGATCCTTCAATTTTACCCCTCCTTGCCCTTCTCACCCCTCCTC  
ACGTACTTTCTATGACTTTCTCAGCATTCCCTAATTTTTAAAGTAAACAAAGCGACCA  
CCGTCAATGCCCTCGCCATCTCGTGAACAAAACTCCTGCCCTCACAGCCCTAGCAC  
CCCTGGTTTTACTTTCTCTCGGCGGCCTTCCTCCCCTTACCGGCTTCATGCCCAAGTG  
ATTCATTCTTCAGGAAGTGAATAACAAGACCTTCCGCACTTGCCACCCTCGCCGCT  
TTAACTGCCCTCTTGAGTCTCTACTTCTACTTGCGCCTCTCGTATGCAATAACCCTCA  
CAATATTCCCCAACAACCTAATTGGTGTCACTCCCTGACGATTCTACTCCCCCAATT  
TACACTTCCCCTCGCCGTCTCCACTGCAGCAACCACCCTTCTTCTCCCCTAGCCCCC  
GCTGCCGTAGCACTACTGGTCACCTATGAGCCTTCTCCTAACCATCATTTCGATTGCC  
ACCCTCCTCTCGACAGTACTAGCCCTTGATCCTTTTGATTACCCCAAATTACACCAG  
ACCACGAAAAGCTATCGCCGTACGAGTGCGGCTTTGACCCGATAGGATCCGCCCCG  
CTGCCTTTTTCACTGCGGTTTTCTCCTCATCGCCATCCTCTTTCTTCTCTTCGATTAGA  
AATTGCTCTCCTCCTCCCTCTTCCATGAGGAGACCAACTAGCATCGCCACTACTGAC  
GTTACCTGAGCTACAGCTGTCTAGCCCTTCTAACCCTCGGCCTCATTTACGAATG  
AATGCAAGGAGGTCTAGAATGGGCTGAATATGCTAAAAGTCCTAATCCCAACACTT  
ATGCTAATCCCAACAGCCTGGTTACTCAAACCCAGCTGACTCTGGCCCATGACTTTA

ATGTATAGCTTTTGCATCTCCTTGGTTAGCCTTTCATGACTAAAGAACCTCTCAGAAA  
CCGGCTGATCGTCACTTAGCCTCTTTATAGCTACCGACTCCCTATCAACCCCCCTCCT  
CGTTCTTACATGCTGATTACTCCCACTAATAATTTTGGCAAGCCAAAAACACACAGC  
CTTAGAACCTCTTAGTCGCCAGCGCATGTACATCACACTTCTCGCCTCCTCCAGTTTT  
TCCTAATCCTAGCATTTAGCGCCACCGAACTGGTGATGTTTTACGTAATATTTGAAG  
CCACCCTCATCCCCACGCTAATCATTATCACCCGCTGAGGAAACCAAACAGAACGTC  
TAAACGCAGGAACCTACTTTCTCTTCTATACATTAGCGGGCTCACTCCCTCTTCTCGT  
TGCTTTACTCCTACTCCAAAACACATCCGGCACCCCTGTCGCTGTTAACCCTTCACTAT  
ACGGACCCGCTCGCTCTCGTCTTATGCAGACAACTATGATGAGCAGGCTGTCTTTT  
AGCATTCCTGGTTAAAATACCCCTCTACGGGGTCCACCTATGGCTCCCTAAAGCCCA  
TGTTGAAGCCCCAATTGCAGGCTCAATAATCCTTGCAGCGGTTCTACTGAAGCTAGG  
GGGATACGGCATAATCCGCATAATAACAATATTGGAACCTCTAACTAAGGAGTTAA  
GCTACCCCTTCATTGTCTTTGCACTTTGAGGGGTAATTATAACTGGGTCAATTTGTCT  
ACGCCAGACAGACCTTAAGTCCCTAATTGCCTACTCCTCAGTCAGCCACATAGGCCT  
AGTGGCTGGAGGAATTCTTATCCAATCACCCCTGGGGCTTAACAGGGGGCTCTTACCCT  
CATAATTGCACACGGGCTTACTTCATCAGCCCTCTTCTGCTTAGCAAACACAACTA  
TGAACGAACCCACAGTCGAACGATAGTCCTGGCGCGAGGACTTCAAGTAGCCCTAC  
CACTAATAGCCACTTGATGATTTATTTCTAGCTTGGCCAACCTAGCTCTGCCACCACT  
ACCCAACCTCATGGGGGAGCTGATAATTATCACTTCTTTATTCAACTGGTCCTGATG  
AACTCTGGCATTAAACCGGTGCAGGCACTCTAATCACAGCTGGTTACTCCCTTTACAT  
ATTCTTAATAACTCAGCGGGGCCCTCTCCCAACACATGTCATTGCACTTGAGCCATC  
TCACACCCGAGAACACCTTCTTATTGCCTTCACCTCATCCCTTAATTCTACTCGTAC  
TTAAGCCCGAGCTGATCTGAGGCTGAACTGCCTATGACCCCCACACACTTTGCCTTC  
TCCTCAGCCTTTCTTCTGGGTTTAAACAGGCCTGGCATTCCACCGGTTTCACCTCCTTT  
CCGCCCTATTGTGCCTTGAAGGAATAATACTATCCCTATTTATTGCTCTCTCCCTATG  
AACGCTCCAACCTTGACTCAACCAACTTTTCAGCATCTCCAATACTTCTGCTTGCATTT  
TCAGCCTGCGAAGCAAGCGCCGGCCTCGCCCTATTAGTAGCCACTGCTCGAACCAC  
GGGACCGACCGATTACAAAGCCTAAATCTTCTCCAATGCTAAATGTACCCACCTCC  
CTAATGATTTTCATCGAGCCTGATCACAATCTTTGCGTTACTAGCCTATCCTTTAATCA  
CCACGATCCGCCCTACACCTCGGGACCTCAATGGGCTACCACCCATGTCAAAACAG  
CTGTAAAAATAGCTTTCTTTGTTAGTCTGCTGCCTCTGACCCTATTTCTTAATGAGGG  
CGCAGAAACAATCGTTACTAACTGAACCTGAATAAATACCAACTCCTTCAATGTCAG  
CATTAGCTTGAAATTTGATTTCTACTCAATTATTTTTACACCCATTGCCCTCTACGTA  
ACTTGATCCATCCTGGAGTTCGCATCATGGTATATGCACGCAGACCCACACATGAAC  
CGCTTCTTTAAGTACCTCCTGACGTTTCTGATTGCCATAATCGTCCTAGTAACTGCAA  
ACAATATGTTTCAACTATTTATCGGTTGAGAGGGCGTGGGGATCATATCGTTCTTAC  
TTATTGGATGGTGGTTCGGACGGGCGGATGCTAACACTGCAGCGCTTCAAGCAGTAC  
TTTACAACCGAGTAGGGGACATCGGGCTTATCTTCGCCATGGCTTGAATAGCAGCAA  
ACCTAAACTCCTGGGAGATGCAACAAATCTTTGCAACCACCAAAGACATAGACTTA  
ACCTACCCTCTTCTCGGACTCATATTGCAGCAACTGGCAAATCGGCTCAATTCGGA  
CTTCACCCTTGACTACCCTCCGCTATGGAGGGTCCCACACCGGTCTCTGCCCTACTTC  
ATTCTAGCACTATGGTCGTTGCCGGCATTTTTTCTGCTAGTACGAATAAGCCCGCTACT  
GGAAAACAACCAAACCGCCCTCACAACCTGCCTATGCCTCGGAGCTCTTACAACACT  
ATTCAGTGAACCTGTGCCCTCACGCAAAATGATATTAATAAAAAATCGTCGCATTCTC  
TACATCCAGCCAGCTTGGGCTTATAATGGTAACCATTTGGTCTAAACCAGGCCACA  
AGCATTTCTTACATCTGTACACATGCCTTCTTCAAGGCCATACTATTTTTATGCTCC  
GGATCTATTATCCACAGCCTAAATGATGAACAAGATATCCGGAAAATAGGGGGCAT  
ACACCACCTTGACCTTTCACATCCTCTTGCCTAACTATTGGCAGCCTCGCCCTCACA  
GGAACCCCTTCTTGGCTGGCTTCTTCTCTAAAGATGCCATCATCGAAGCATTAAAC  
ACATCCCACCTAAACGCCTGAGCCCTAACCTTAACCTCCTAGCCACCTCTTTTACA  
GCAATCTACAGCTTTCGAGTAGTATTTTTTTGTACCCATGGGGCACCCCGATTAGTC  
CCTCTCTCCGATCAACGAAAACAACCCAGCAGTGATTAACCCACTTAAGCGACTAGC

ATGGGGGAGTATCGTTGCAGGCTTACTAATTACCTCTAATATTACACCCTTGAAAAC  
CCCTGTCATATCTATACCTCCCCTCCTTAAACTAGCTGCTCTTGCAGTCACAATCATC  
GGCCTTCTTGTTGCTATAGAGCTCGCCATGTTAACCAACAAACAATATGAGCCAATA  
CCCAACACGACATACACCCTTCTCTGCCTTATTAGGCTTCTTCCCCGGGGTTATACA  
CCGCCTAACCCCTGTATTGCTCTTCTTCCTAGGCCAAAACATTGCTAACC AAAACAGT  
AGATCAGACATGATTAGAAAAAACGGGCCCCAAAGCCATTGAAGCCGCTAACCGAC  
CTCTCGTCTCCTCTACAAGTAACATTCAACGGGGGGTAATCAAAACATATCTCCCCT  
CTTCCTCCTTACACTAGCCCTTATAATCCCCCTATTCATCACCTAATGACTTTCGCTA  
TATATTTAGTTTTATTTTCTCTTGTGTTGGGGTTAGTTGCAGTTGCTTCTAATCCGTCC  
CCTTATTTTGCTGCTTTGGGTTTGGTTGTGGTAGCTGGCATGGGGTGTGGTATATTAG  
TCGGGCATGGAGGGGCCCTTTTTGTCACTAGTCTTGTTCCTAATTTACTTAGGCGGGAT  
GTTAGTTGTATTTGCATATTCAGCAGCGTTAGCTGCTGAGCCGTACCCAGAGAGCTG  
GGGTAGTTGGTCGGTAATGGTATACGGTTGTCTACACAGGGGGAGTATTATAGTTTC  
CGGGCTGTTTTGAGGGGGGTGGTATGAATCTTCTTGGGTCTAGCAGATGAGTTAGG  
GGAGTTTTCCGTGTTTCGAGGTGATATTGGAGGGGTAGCCTTAATATACTCTTCTGG  
GGGGTGGTTGTTAATTACTAGTGCATGGGTATTGCTTTTAACTTTATTTGTAGTCCTT  
GAGTTAACCGGGGTATGAGTCGAGGGGCGTTGCGACGGTTT

Hippoglossus\_hippoglossus\_AM749123

ATGATACTAAGCTTCTTTGACCAATTTATATCCCCTTCATACCTCGGCATTCCACTAA  
TTGCACTAGCGATTAGCCTGCCTTGAGTTCTGTTCCCAACCCCTCAAGCCGCTGATTA  
AACAAACCGCGTGCTAACACTTCAAGGGTGATTTATTAGCCGCTTCACCTCACAACCTT  
CTTCTACCCCTAAACCCTGGGGGCCACAAGTGGGCAGTTCTATTACCTCGTTAATG  
TTTTCTTTTCTATCAACATGCTAGGACTCCTTCCATACACCTTCACACCAACAACCC  
AACTCTCCCTTAACATGGGCCTCGCAGTACCCCTTTGATTGGCAACTGTCATTATGG  
GATACGAAATCAACCAACGCATGCCCTAGGCCACCTTCTTCCAGAAGGCACCCCCA  
CTGCCCTCATCCCTGTACTTATTATCATTGAAACAATTAGCCTATTCAATTCGACCCTT  
AGCTCTCGGTGTCCGACTAACAGCAAATCTCACAGCAGGCCACCTCCTCAATCAACT  
CATTGCAACGGCTGCCTTCGTCTTCTTCCCCTCATACCTGTTGTCGCTATCTTAACA  
ACGGTGGTCCTCTTCTCCTCACTCTACTAGAAGTAGCCGTTGCCATGATTCAAGCTT  
ATGTCTTTGTTCTACTCCTAAGCCTATATCTACAAGAGAACGTTTAAATGCCTCAACTG  
AACCCCGCACCCCTGATTTGCAATTTTAGTTTTCTCTTGAATAATCTTTTTAACTGTTA  
TTCCCCCAAAGTTTTAGCACACACCTATCCCAATGAACCCACCTCCCAAAGCACAC  
AAAAACAAAACAGAGCCCTGAAACTGACCATGATACTAAGTGGCAATCACACGTTG  
ATTTTCTCGACCAATCACAAAGACATCGGCACCCTCTATCTCGTATTTGGTGCCTGA  
GCCGGAATAGTGGGGACAGGCCTAAGTCTGCTTATTCGGGCAGAACTAAGCCAACC  
CGGGGCTCTCCTGGGAGACGACCAAATTTATAATGTGATCGTCACCGCACACGCCTT  
TGTAATAATCTTTTTTATAGTAATACCCATTATGATTGGGGGGTTCGGAACTGGCTT  
ATTCCACTAATAATTGGGGCCCCAGACATGGCGTTCCCTCGAATGAATAATATGAGT  
TTCTGACTTCTTCCCCCCTCCTTTCTCCTCCTCTTAGCCTCTTCAGGTGTTGAAGCCGG  
AGCAGGTACCGGATGAACCGTGTACCCCCCACTAGCTGGCAATTTAGCCACGCCG  
GGGCATCCGTAGACCTGACAATCTTCTCACTTCACCTTGCAGGAATTTTCATCAATTCT  
GGGGGCAATTAACCTTTATTACTACCATCATTAACATGAAACCCACAACAGTCACTAT  
GTACCAAATCCCGTTATTTGTTTGAGCCGTTCTTATTACAGCCGTACTTCTTCTTCTG  
TCCCTGCCCGTTTTAGCCGCAGGGATTACAATGCTACTAACAGACCGCAACCTTAAC  
ACGACCTTCTTTGACCCTGCCGGAGGAGGTGACCCCATTCCTCTACCAACACCTATTC  
TGATTCTTTGGCCACCCAGAGGTATACATTCTTATTCTCCCAGGCTTCGGAATAATTT  
CTCACATTGTTGCATACTATGCAGGTAAAGAAAGAACCTTTTGGCTACATGGGGGATAG  
TCTGAGCTATAATAGCCATTGGACTCCTGGGCTTCATTGTCTGGGGCCATCACATGTT  
TACAGTCGGAATAGACGTAGATACACGAGCCTACTTTACCTCTGCCACAATAATCAT  
TGCGATTCCAACCTGGCGTAAAAGTCTTTAGCTGACTCGCAACCCTCCATGGGGGAAG  
CATTAATGAGAAACGCCCTTCTATGAGCCCTCGGCTTTATTTTCTCTTTACAGTA  
GGCGGTCTCACTGGCATTGTCTTAGCTAACTCCTCTCTCGATATTGTTCTGCATGACA

CATACTATGTAGTCGCCCCTTCCACTATGTACTATCTATGGGTGCTGTATTTGCAAT  
CGTTGCCGCCTTCGTCCATTGATTTCCGTTATTTACAGGCTATACCCTTCACTCCACA  
TGAACAAAAATCCACTTCGGCCTGATGTTTATTGGGGTCAATCTAACATTCTTCCCTC  
AACATTTTCTGGGCCTGGCTGGGATACCCCGACGGTACTCAGACTACCCAGACGCAT  
ACACCCTTTGAAACACTGTTTCATCAATTGGGTCCCTAATGTCCCTCGTTGCTGTAAT  
TTTATTCTTATTCATTATTTGAGAAGCATTTACAGCCAAACGAGAAGTCGGAGCAGT  
AGAACTAACTGCAACTAACATTGAATGACTTTACGGCTGCCCTCCCCCTACCACAC  
ATTTGAAGAGCCCGCATTCGTACAAGTTCGTATAAACTAAATGGCACATCCCTCACA  
ACTCGGATTTCAAGACGCAGCTTCACCCTTAATAGAAGAACTACTTCACTTCCACGA  
CCACGCCTTAATAATTGTAATTCTCATTAGCACAATGGTACTTTATATTATTGCGGCT  
ATAGTCACAGCCAACTAACAGATAAACTTGTACTAGACTCTCAAGAAATTGAAAT  
TATCTGAACAGTTCTCCCAGCTGTTATTCTTATCCTTATCGCCCTACCATCCATCCGA  
ATTTTGTACTTAATAGACGAAATTAATGACCCCCACCTTACAATCAAAGCCATCGGC  
CACCAATGATACTGAAGCTACGAATACACAGACTACGAAGACCTCGGTTTTGACTC  
ATACATAATCCCCACACAAGACCTGACCCCTGGACAATTCCGACTACTAGAAGCAG  
ACCACCGAATAGTAATCCCAGTAGAATCTCCAATTCGCGTTTTAATCTCGGCTGAAG  
ATGTCTTACATTCTTGGGCAGTCCCCTCTCTAGGCGTAAAAGTTGACGCCGTACCTG  
GACGATTGAACCAAGCAACCTTTATTGTTAGCCGACCAGGCGTATTTTTCGGACAAT  
GTTCTGAAATTTGCGGGGCTAACCATAGTTTTATACCCATTGTTGTAGAAGCAGTCC  
CCCTTGAACACTTTGAGAAGTGGTCTTCACTAATAATTGAAGACGCCTATGGCCCAT  
CAAGCACACCCATACCACATAGTCGACCCCAGCCCATGACCCCTAACAGGGGGCTAT  
TGCTGCCCTATTGATAACATCTGGCCTTGCTATCTGATTCCACTTCCACTCCACAACC  
CTAATAACTATTGGGACAATCCTTCTCACCTTAACAATCTTCCAATGATGACGGGAC  
GTCGTACGAGAAGGCACATTTCAAGGACACCACACTCCCCCGTTCAAAAAGGCCT  
CCGATATGGGATAATTTTATTTATTACCTCAGAAGTCCTATTCTTCTTAGGCTTCTTC  
TGAGCCTTTTACCCTCAAGCCTAGCACCTACCCCTGAGCTAGGCGGCTTCTGACCA  
CCAGCAGGCATTACTCCCTTAGACCCATTTGAAGTCCCCTTCTTAACACAGCAGTC  
CTGCTCGCCTCTGGCGTAACTGTTACCTGAGCACATCACAGCATTATGGAGGGTAAA  
CGAAAACAACTATTCAATCTCTTGCTCTTACAATCTTACTCGGGGGGTACTTCACTT  
TCCTTCAAGGCCTAGAGTATCACGAAGCCCCCTTACCATTGCAGACGGAGTTTACG  
GCGCTACATTCTTTGTTGCCACCGGCTTCCACGGATTACACGTCTTAATTGGCACATC  
ATTCTTAGCCGTTTGTCTATTACGCCAGATTCTTCACCATTTCACATCAAACCACCAC  
TTTGGGTTTGAAGCAGCCGCATGATACTGACACTTCGTAGACGTCGTCTGACTTTTC  
CTCTATATCTCTATTTACTGATGAGGATCTTAATGGCCAGTCTACGTAAATCCCACCC  
TCTTCTAAAAATCGCAAACGATGCTTTAGTCGACCTCCCCGCCCTCTAATATCTCG  
GTTTGATGGAACCTTTGGGTCTCTTTTAGGACTATGTTTAATTACCCAAATTGCGACCG  
GCTTATTTCTAGCCATACACTACACATCAGACATTGCTACTGCCTTCACCTCCGTGGC  
CCACATCTGTCGAGACGTCAACTACGGCTGACTTATCCGAAGCATTTCATGCCAACGG  
CGCATCATTCTTTTTCATTTGCCTCTACCTTCATATTGGCCGAGGACTATACTATGGC  
TCTTACCTCTATAAAGAAACATGAACTGTTGGGGTTATTCTTCTCCTTCTCGTAATAA  
TAACAGCCTTCGTTGGATACGTCCCTCCCTTGAGGACAAATGTCGTTTTGAGGTGCAA  
CCGTTATTACCAACCTTCTATCTGCCGTCCCCTACGTGCGAAACACCCTGGTCCAAT  
GGATCTGAGGGGGTTTTTCTGTAGACAATGCTACCCTCACCCGGTTCTTTGCCTTCCA  
CTTTCTCTTCCCCTTCATCATCGCTGCCGCAACATTAATTCATCTACTCTTTCTTCACG  
AGACTGGCTCAAACAACCCACCGGACTAACTCAGACTCCGACAAAGTTCCCTTTC  
ACCCCTACTTCACTTACAAAGACCTCTTGGCTTTGCAGTACTTCTTACTGCATTAGCA  
TCCCTAGCCCTATTTTCCCCAAATCTCTTAGGAGACCCAGATAACTTTACCCCTGCAA  
ATCCGCTTGTTACTCCCCACACATTAAGCCAGAGTGATACTTCCTGTTTGCCTATGC  
TATTCTACGCTCCATTCCAAACAACTTGGAGGAGTACTTGCCCTTTTATTCTCCATC  
TTAGTTCTTATGCTCGTCCCTTTCTTCATACCTCTAAACAACGAAGCCTAATATTCC  
GTCCCTAACACAATTCTTGTTTTGGTCTTTAGTAGCAGACGTTATGATTCTAACTTG  
AATTGGAGGGATGCCCGTAGAGCACCCCTTCGTTCATCATTGGACAAGTAGCGTCTCT

CCTTTACTTCTCCCTCTTCCTAGTCCTGATCCCAACAGCAGGTTGACTAGAGAATAA  
AGTCCTTGGATGAAAATATGATTTCAACTCTCATTACTCATATTATCAACCCACTAA  
CCTTTATTGTGCCTGTATTGCTAGCCGTAGCATTCCCTCACCCCTCCTTGAACGAAAAGT  
GCTAGGCTACATACAACTACGAAAAGGGCCAAACATTGTTGGGCCTTACGGCCTCCT  
TCAACCTATTGCTGATGGCGTAAAACTCTTTATTAAAGAACCCATTTCGACCTTCAAC  
CGCATCACCCGTCTATTCCCTCGTGGCCCCCTATGCTCGCTCTCACACTAGCCCTAACC  
CTTTGAGCCCCCATACCTTTCCCGTACCCTGTCTGCTGGACCTTAACCTAGGTATTTTAT  
TTATTCTAGCTCTATCTAGCCTTGCAGTGTATTCTATTCTGGGCTCCGGCTGAGCATC  
TAATTCAAAATATGCCCTAGTAGGGGCACTGCGGGCTGTCTGCACAAACAATTTCTTA  
CGAAGTTAGCCTTGGACTCATCTTACTAAACATTATCATCTTCACCGGGGGCTTCAC  
ACTCCAAACCTTTAACACAGCCCAAGAGGCCATTTGACTGGTAGTGCCCGCTTGACC  
GCTGGCTGCCATATGATATATCTCCACTCTTGCCGAAACAAACCGTGACCCCTTCGA  
CTTAACAGAAGGGGAATCTGAACTTGTCTCGGGCTTCAACGTAGAGTACGCAGGGG  
GACCCTTCGCCTTGTTCTTCTTAGCCGAATATTCAAATATTCTCCTAATAAAATACCT  
GTCCGCTACACTATTTTTAGGGGGCTCCACATCCCCTATCTATCCCGGAATTAAGTAGT  
ATCAATATTATGACTAAAGCAGCCCTTCTATCAATTGTCTTCTGTGGGTCCGAGCTT  
CGTACCCGCGATTCCGTTACGACCAACTTATGCACCTCATTTGAAAAAACTTTCTTCC  
ACTGACTTTGGCACTAGTTATCTGACACTTGGCGCTCCCTATTGCATTTCGCTGGTCTC  
CCACCACAACCTATAGATGAACCCCTACATCTTGACCACTCTTCTATTTGGTTTGGGCC  
TTGGAACAACACTCACGTTTGCAAGCTCACACTGGCTCCTCGCTTGAATAGGACTTG  
AGATTAATACACTAGCCATTATTCCCCTAATAGCCCAACACCACCACCCCGGGCAG  
TCGAAGCTACTACTAAATACTTTCTCGCACAAGCCACAGCAGCCGCCACCCTCCTGT  
TTGCAAGCACTACCAACGCTTGACTCACAGGCCAATGGGATATTCAACAGATAACA  
CATCCCCTCCCCACAACAATGATTGTTATTGCCCTCGCGCTAAAAGTCGGACTGGCA  
CCAATGCACTCTTGACTCCCCGAAGTACTCCAAGGGCTAGACCTGACCACCGGGCTC  
ATCCTCTCGACCTGACAAAACTTGACCCCTTTGCCCTCTTACTACAAATTCAAACA  
ACAACCCTACCCCTCTAATCATTATTGGCTTACTATCCACTCTCGTTGGTGGCTGAGG  
TGGTCTCAACCAAACCCAGCTGCGCAAGGTCCCTCGCCTACTCCTCAATTGCCACCT  
TGGCTGAATAATGCTGATCCTTCAATTTTACCCCTCCTTGCCCTTCTCACCCCTCCTC  
ACGTACTTTCTATGACTTTCTCAGCATTCCCTAATTTTTAAAGTAAACAAAGCGACCA  
CCGTCAATGCCCTCGCCATCTCGTGAACAAAACTCCTGCCCTCACAGCCCTAGCAC  
CCCTGGTTTTACTTTCTCTCGGCGGCCTTCCTCCCCTTACCGGCTTCATGCCCAAGTG  
ATTCATTCTTCAGGAACTGACTAAACAAGACCTTCCGCACTTGCCACCCTCGCCGCT  
TTAACTGCCCTCTTGAGTCTCTACTTCTACTTGCGCCTCTCGTATGCAATAACCCTCA  
CAATATTCCCCAACAACCTAATTGGTGTCACTCCCTGACGATTCTACTCCCCCAATT  
TACACTTCCCCTCGCCGTCTCCACTGCAGCAACCACCCTTCTTCTCCCACTAGCCCC  
GCTGCCGTAGCACTACTGGTCACCTATGAGCCTTCTCCTAACCATCATTTTCGATTGCC  
ACCCTCCTCTCGACAGTACTAGCCCTTGTATCCTTTTGATTACCCCAAATTACACCAG  
ACCACGAAAAGCTATCGCCGTACGAGTGCGGCTTTGACCCGATAGGATCCGCCCCG  
CTGCCTTTTTCACTGCGGTTTTCTCATCGCCATCCTCTTTCTTCTCTTCGATTTAGA  
AATTGCTCTCCTCCTCCCTCTTCCATGAGGAGACCAACTAGCATCGCCACTACTGAC  
GTTACCTGAGCTACAGCTGTCTAGCCCTTCTAACCCTCGGCCTCATTTACGAATG  
AATGCAAGGAGGTCTAGAATGGGCTGAATATGCTAAAAGTCCTAATCCCAACACTT  
ATGCTAATCCCAACAGCCTGGTTACTCAAACCCAGCTGACTCTGGCCCATGACTTTA  
ATGTATAGCTTTTGCATCTCCTTGGTTAGCCTTTCATGACTAAAGAACCTCTCAGAAA  
CCGGCTGATCGTCACTTAGCCTCTTTATAGCTACCGACTCCCTATCAACCCCCCTCCT  
CGTTCTTACATGCTGATTACTCCCACTAATAATTTTGGCAAGCCAAAAACACACAGC  
CTTAGAACCTCTTAGTCGCCAGCGCATGTACATCACACTTCTCGCCTCCTCCAGTTTT  
TCCTAATCCTAGCATTTAGCGCCACCGAACTGGTGATGTTTTACGTAATATTTGAAG  
CCACCCTCATCCCCACGCTAATCATTATCACCCGCTGAGGAAACCAAACAGAACGTC  
TAAACGCAGGAACCTACTTTCTTCTTATACATTAGCGGGCTCACTCCCTCTTCTCGT  
TGCTTTACTCCTACTCCAAAACACATCCGGCACCCCTGTCTGCTGTTAACCCCTTCACTAT

ACGGACCCGCTCGCTCTCGTCTTATGCAGACAAACTATGATGAGCAGGCTGTCTTTT  
AGCATTCCTGGTTAAAATACCCCTCTACGGGGTCCACCTATGGCTCCCTAAAGCCCA  
TGTTGAAGCCCCAATTGCAGGCTCAATAATCCTTGCAGCGGTTCTACTGAAGCTAGG  
GGGATACGGCATAATCCGCATAATAACAATATTGGAACCTCTAACTAAGGAGTTAA  
GCTACCCCTTCATTGTCTTTGCACTTTGAGGGGTAAATTATAACTGGGTCAATTTGTCT  
ACGCCAGACAGACCTTAAGTCCCTAATTGCCTACTCCTCAGTCAGCCACATAGGCCT  
AGTGGCTGGAGGAATTCTTATCCAATCACCTGGGGCTTAACAGGGGGCTCTTACCCT  
CATAATTGCACACGGGCTTACTTCATCAGCCCTCTTCTGCTTAGCAAACACAACTA  
TGAACGAACCCACAGTCGAACGATAGTCCTGGCGCGAGGACTTCAAGTAGCCCTAC  
CACTAATAGCCACTTGATGATTTATTTCTAGCTTGGCCAACCTAGCTCTGCCACCCT  
ACCCAACCTCATGGGGGAGCTGATAATTATCACTTCTTTATTCAACTGGTCCTGATG  
AACTCTGGCATTAAACCGGTGCAGGCACTCTAATCACAGCTGGTTACTCCCTTTACAT  
ATTCTTAATAACTCAGCGGGGGCCCTCTCCCAACACATGTCATTGCACTTGAGCCATC  
TCACACCCGAGAACACCTTCTTATTGCCTTCACCTCATCCCCCTTAATTCTACTCGTAC  
TTAAGCCCGAGCTGATCTGAGGCTGAACTGCCTATGACCCCCACACACTTTGCCTTC  
TCCTCAGCCTTTCTTCTGGGTTTAACAGGCCTGGCATTCCACCAGTTTCACCTCCTTT  
CCGCCCTATTGTGCCTTGAAGGAATAATACTATCCCTATTTATTGCTCTCTCCCTATG  
AACGCTCCAACCTTGACTCAACCAACTTTTCAGCATCTCCAATACTTCTGCTTGCATTT  
TCAGCCTGCGAAGCAAGCGCCGGCCTCGCCCTATTAGTAGCCACTGCTCGAACCCAC  
GGGACCGACCGATTACAAAGCCTAAATCTTCTCCAATGCTAAATGTACCCACCTCC  
CTAATGATTTTCATCGAGCCTGATCACAATCTTTGCGTTACTAGCCTATCCTTTAATCA  
CCACGATCCGCCCTGCACCTCGGGACCCTCAATGGGCTACCACCCATGTCAAAACAG  
CTGTAAAAATAGCTTTCTTTGTTAGTCTGCTGCCTCTGACCCTATTTCTTAATGAGGG  
CGCAGAAACAATCGTTACTAACTGAACCTGAATAAATACCAACTCCTTCAATGTCAG  
CATTAGCTTGAAATTTGATTTCTACTCAATTATTTTTACACCCATTGCCCTCTACGTA  
ACTTGATCCATCCTGGAGTTTCGCATCATGGTATATGCACGCAGACCCACACATGAAC  
CGCTTCTTTAAATACCTCCTGACGTTTCTGATTGCCATAATCGTCCTAGTAACTGCAA  
ACAATATGTTTCAACTATTTATCGGTTGAGAGGGCGTGGGGATCATATCGTTCTTAC  
TTATTGGATGGTGGTTCGGACGGGCGGATGCTAACACTGCAGCGCTTCAAGCAGTAC  
TTTACAACCGAGTAGGGGACATCGGGCTTATCTTCGCCATGGCTTGAATAGCAGCAA  
ACCTAAACTCCTGGGAGATGCAACAAATCTTTGCAACCACCAAAGACATAGACTTA  
ACCTACCCTCTTCTCGGGCTCATCATTGCAGCAACTGGCAAATCGGCTCAATTCGGA  
CTTCACCCTTGACTACCCTCCGCTATGGAGGGTCCCACACCGGTCTCTGCCCTACTTC  
ATTCTAGCACTATGGTCGTTGCCGGCATTTTTCTGCTAGTACGAATAAGCCCGCTACT  
GGAAAACAACCAAACCGCCCTCACAACCTGCCTATGCCTCGGAGCTCTTACAACACT  
ATTCCTGCAACCTGTGCCCTCACGCAAAATGATATTAATAAATAATCGTCGCATTCTC  
TACATCCAGCCAGCTTGGGCTTATAATGGTAACCATTGGTCTAAACCAGCCACAAC  
AGCGTTTCTTCACATCTGTACACATGCCTTCTTCAAGGCCATACTATTTTTATGCTCC  
GGATCTATTATCCACAGCCTAAATGATGAACAAGATATCCGGAAAATAGGGGGCAT  
ACACCACCTTGACCTTTACATCCTCTTGCCTAACTATTGGCAGCCTCGCCCTCACA  
GGAACCCCTTCTTGGCTGGCTTCTTCTCTAAAGATGCCATCATCGAAGCATTGAAC  
ACATCCCACCTAAACGCCTGAGCCCTAACCTTAACCCTCCTAGCCACCTCTTTCACA  
GCAATCTACAGCTTTCGAGTAGTATTTTTTTGTACCCATGGGGCCACCCCGATTAGTC  
CCTCTCTCCGATCAACGAAAACAACCCAGCAGTGATTAACCCACTTAAGCGACTAGC  
ATGGGGGAGTATCGTTGCAGGCTTACTAATTACCTCTAATATTACACCCTTGAAAAC  
CCCTGTCATATCTATACTCCCTCCTTAAACTAGCTGCTCTTGCAGTCACAATCATC  
GGCCTTCTTGTTGCTATAGAGCTCGCCATGTTAACCAACAAACAATATGAGCCAATA  
CCCAACACGACATACACCCTTCTCTGCCTTATTAGGCTTCTTCCCCGGGGTTATACA  
CCGCCTAACCCCTGTATTGCTCTTCTTCTTAGGCCAAAACATTGCTAACCAAAACAGT  
AGATCAGACATGACTAGAAAAAACGGGGCCCCAAAGCCATTGAAGCCGCTAACCGAC  
CTCTCGTCTCCTCTACAAGTAACATTCAACGGGGGGTAATCAAAACATATCTCCCT  
CTTCCTCCTTACACTAGCCCTTATAATCCCCCTATTCATCACCTAATGACTTTCGCTA



TATATTTAGTTTTATTTTCTCTTGTGTTGGGGTTAGTTGCAGTTGCTTCTAACCCGTCC  
CCTTATTTTGTCTGCTTTGGGTTTGGTTGTGGTAGCTGGCATGGGGTGTGGTATATTAG  
TCGGGCATGGAGGGGCCCTTTTTGTCACTAGTCTTGTCTTAATTTACTTAGGCGGGAT  
GTTAGTTGTATTTGCATATTCAGCAGCGTTAGCTGCTGAGCCGTATCCAGAGAGCTG  
GGGTAGTTGGTCGGTAATGGTATACGGTTGTCTACACAGGAGGAGTATTATAGTTTC  
CGGGCTGTTTTGAGGGGGGTGGTATGAATCTTCTTGGGTCTAGCAGATGAGTTAGG  
GGAGTTTTCCGTGTTTCGAGGTGATATTGGAGGGGTAGCCTTAATATACTCTTCTGG  
GGGGTGGTTGTTAATTACTAGTGCATGGGTATTGCTCTTAACCTTTATTTGTAGTCCTT  
GAGTTAACCGGGGTATGAGTCGAGGGGCGTTGCGACGGTTT

Hippoglossus\_hippoglossus\_AM749124

ATGATACTAAGCTTCTTTGACCAATTTATATCCCCTTCATACCTCGGCATTCCACTAA  
TTGCACTAGCGATTAGCCTGCCTTGAATTCTGTTCCCAACCCCTCAAGCCGCTGATTA  
AACAAACCGCGTGCTAACACTTCAGGGGTGATTTATTAGCCGCTTCACCTCACAACCTT  
CTTCTACCCCTAAACCCCTGGGGGGCCACAAGTGGGCAGTTCTATTACCTCGTTAATG  
TTTTCTTTTCTATCAACATGCTAGGACTCCTTCCATACACCTTCACACCAACAACCC  
AACTCTCCCTTAACATGGGCCTCGCAGTACCCCTTTGATTGGCAACTGTCATTATGG  
GATACGAAATCAACCAACGCATGCCCTAGGCCACCTTCTTCCAGAAGGCACCCCCA  
CTGCCCTCATCCCTGTACTTATTATCATTGAAACAATTAGCCTATTCATTTCGACCCTT  
AGCTCTCGGTGTCCGACTAACAGCAAATCTCACAGCAGGCCACCTCCTTATTCAACT  
CATTGCAACAGCTGCCTTCGTCCTTCTTCCCCTCATACCTGTTGTGCTATCTTAACA  
ACGGTGGTCCTCTTCCCTCCTCACTCTACTAGAAGTAGCCGTTGCCATGATTCAAGCTT  
ATGTCTTTGTTCTACTCCTAAGCCTATACCTACAAGAGAACGTTTAATGCCTCAACTG  
AACCCCGCACCTTGATTTGCAATTTTAGTTTTCTCTTGAATAGTCTTTTTAACTGTTA  
TTCCCCCAAGGTTTTAGCACACACCTATCCCAATGAACCCACCTCCCAAAGCACAC  
AAAAACAAAACAGAGCCCTGAAACTGACCATGATACTAAGTGGCAATCACACGTTG  
ATTTTTCTCGACCAATCACAAAGACATCGGCACCCTCTATCTCGTATTTGGTGCCTGA  
GCCGGAATAGTGGGGACAGGCCTAAGTCTGCTTATTCGGGCAGAACTAAGCCAATC  
CGGGGCTCTCCTGGGAGACGACCAAATTTATAATGTGATCGTCACCGCACACGCCTT  
TGTAATAATCTTTTTTATAGTAATACCCATTATGATTGGGGGGTTCGGAAACTGGCTT  
ATTCCACTAATAATTGGGGCCCCAGACATGGCGTTCCCTCGAATGAATAATATGAGT  
TTCTGACTTCTTCCCCCCTCCTTTCTCCTCCTCTTAGCCTCTTCAGGTGTTGAAGCCGG  
AGCAGGTACCGGATGAACCGTGTACCCCCCACTAGCTGGCAATTTAGCCCACGCCG  
GGGCATCCGTAGACCTGACAATCTTCTCACTTCACCTTGCAGGAATTTCTCAATTCT  
GGGGGCAATTAACCTTTATTACTACCATCATTAAACATGAAACCCACAACAGTCACTAT  
GTACCAAATCCCGTTATTTGTTTGAGCCGTTCTTATTACAGCCGTACTTCTTCTTCTG  
TCCCTGCCCGTTTTAGCCGCAGGGATTACAATGCTACTAACAGACCGCAACCTTAAC  
ACGACCTTCTTTGACCCTGCCGGAGGAGGTGACCCCATTTCTCTACCAACACCTATTC  
TGATTCTTTGGTCACCCAGAGGTATACATTCTTATCCTCCCAGGCTTCGGAATAATTT  
CTCACATTGTTGCATACTATGCAGGTAAGAAAGAACCTTTTGGCTACATGGGGATAG  
TCTGAGCTATAATGGCCATTGGACTCCTGGGCTTCATTGTCTGGGCCCATCACATATT  
TACAGTCGGAATAGACGTAGATACACGAGCCTACTTTACCTCTGCCACAATAATCAT  
TGCAATTCCAACCTGGCGTAAAAGTCTTTAGCTGACTCGCAACCCTCCATGGGGGAAG  
CATTAAATGAGAAACGCCCTTCTATGAGCCCTCGGCTTTATTTTCTCTTTACAGTA  
GGCGGTCTCACTGGCATTGTCTTAGCTAACTCCTCTCTCGATATTGTTCTGCATGACA  
CATACTATGTAGTCGCCCCTTCCACTATGTACTATCTATGGGTGCTGTATTTGCAAT  
CGTTGCCGCCTTCGTCCATTGATTTCCGTTATTTACAGGCTATACCCTTCACTCCACA  
TGAACAAAAATCCACTTCGGCCTGATGTTTATTGGGGTCAATCTAACATTCTTCCCTC  
AACATTTTCTGGGCCTGGCTGGGATACCCCGACGGTACTCAGACTACCCAGACGCAT  
ACACCCTTTGAAACACTGTTTCATCAATTGGGTCCCTAATGTCCCTCGTTGCTGTAAT  
TTTATTCTTATTCATTATTTGAGAAGCATTTACAGCCAAACGAGAAGTCGGAGCAGT  
AGAATAACTGCAACTAACATTGAATGACTTTACGGCTGCCCTCCCCCTACCACAC  
ATTTGAAGAGCCCGCATTCGTACAAGTTCGTATAAACTAAATGGCACATCCCTCACA

ACTCGGATTTCAAGACGCAGCTTCACCCTTAATAGAAGAACTACTTCACTTCCACGA  
CCACGCCTTAATAATTGTAATTCTCATTAGCACAATGGTACTTTATATTATTGCGGCT  
ATAGTCACAGCCAACTAACAGATAAACTTGTACTAGACTCTCAAGAAATTGAAAT  
TATCTGAACAGTTCTCCCAGCTGTTATTCCTATCCTTATCGCCCTACCATCCATCCGA  
ATTTTGTACTTAATAGACGAAATTAATGACCCCCACCTTACAATCAAAGCCATCGGC  
CACCAATGATACTGAAGCTACGAATACACAGACTACGAAGACCTCGGTTTTGACTC  
ATACATAATCCCCACACAAGACCTGACCCCCGGACAATTCCGACTACTAGAAGCAG  
ACCACCGAATAGTAATCCCAGTAGAATCTCCAATTCGCGTTTTAATCTCGGCTGAAG  
ATGTCTTACATTCTGCGGAGTCCCCTCTCTAGGCGTAAAAGTTGACGCCGTACCTG  
GACGATTGAACCAAGCAACCTTTATTGTTAGCCGACCAGGCGTATTTTTTCGGACAAT  
GTTCTGAAATTTGCGGGGCTAACCATAGTTTTATACCCATTGTTGTAGAAGCAGTCC  
CCCTTGAACACTTTGAGAACTGGTCTTCACTAATAATTGAAGACGCCTATGGCCCAT  
CAAGCACACCCATACCACATAGTCGACCCCAGCCCATGACCCCTAACAGGGGGCTAT  
TGCTGCCCTATTGATAACATCTGGCCTTGCTATCTGATTCCACTTCCACTCCACAACC  
CTAATAACTATTGGGACAATCCTTCTCACCTTAACAATCTTCCAATGATGACGGGAC  
GTCGTACGAGAAGGCACATTTCAAGGACACCACACTCCCCCGTTCAAAAAGGCCT  
CCGATATGGGATAATTTTATTTATTACCTCAGAAGTCCTATTCTTCTTAGGCTTCTTC  
TGAGCCTTTTACCACTCAAGCCTAGCACCTACCCCTGAGCTAGGCGGCTTCTGACCA  
CCAGCAGGCATTACTCCCTTAGACCCATTTGAAGTCCCACTTCTTAACACAGCAGTC  
CTGCTCGCCTCTGGCGTAACTGTTACCTGAGCACATCACAGCATTATGGAGGGTAAA  
CGAAAACAACTATTCAATCTCTTGCTCTTACAATCTTACTCGGGGGGTACTTCACTT  
TCCTTCAAGGCCTAGAGTATCACGAAGCCCCCTTCACCATTGCAGACGGGGTTTACG  
GCGCTGCATTCTTTGTTGCCACCGGCTTCCACGGATTACACGTCTTAATTGGCACATC  
ATTCTTAGCCGTTTGTCTATTACGCCAGATTCTTCACCATTTCACATCAAACCACCAC  
TTTGGGTTTGAAGCAGCCGCATGATACTGACACTTCGTAGACGTCGTCTGACTTTTC  
CTCTATATCTCTATTTACTGATGAGGATCTTAATGGCCAGTCTACGTAAATCCCACCC  
TCTTCTAAAAATCGCAAACGATGCTTTAGTCGACCTCCCCGCCCCCTCTAATATCTCG  
GTTTGATGGAACCTTTGGGTCTCTTTTAGGACTCTGTTTAATTACCCAAATTGCGACCG  
GCTTATTTCTAGCCATACACTACACATCAGACATTGCTACTGCCTTCACCTCCGTGGC  
CCACATCTGTCGAGACGTCAACTACGGCTGACTTATCCGAAGCATTTCATGCCAACGG  
CGCATCATTCTTTTTCATTTGCCCTCTACCTTCATATTGGCCGAGGACTATACTATGGC  
TCTTACCTCTATAAAGAAACATGAACTGTTGGGGTTATTCTTCTCCTTCTCGTAATAA  
TAACAGCCTTCGTTGGATACGTCTCCCTTGAGGACAAATGTCGTTTTGAGGTGCAA  
CCGTTATTACCAACCTTCTATCTGCCGTCCCCTACGTCGGAAACACCCTAGTCCAAT  
GAATCTGAGGGGGTTTTTCTGTAGACAATGCTACCCTCACCCGGTTCTTTGCCTTCCA  
CTTTCTCTTCCCCTTCATCATCGCTGCCGCAACATTAATTCATCTACTCTTTCTTCACG  
AGACTGGCTCAAACAACCCACCGGGCTAAACTCAGACTCCGACAAAGTTCCTTTTC  
ACCCCTACTTCACTTACAAAGACCTCTTGCTTTGCAGTACTTCTTACTGCATTAGCA  
TCCCTAGCCCTATTTTCCCCAAATCTCTTAGGAGACCCAGATAACTTTACCCCTGCAA  
ATCCGCTTGTTACTCCCCACACATTAAGCCAGAGTGATACTTCCTGTTTGCCTATGC  
TATTCTACGCTCCATTCCAAACAACTTGGAGGAGTACTTGCCCTTTTATTCTCCATC  
TTAGTTCTTATGCTCGTCCCTTTCCTTCATACCTCTAAACAACGAAGCCTAATATTCC  
GTCCCCTAACACAATTCTTGTTTTGGTCTTTAGTAGCAGACGTTATGATTCTAACTTG  
AATTGGAGGGATGCCCGTAGAACACCCCTTCGTCATCATTGGACAAGTAGCGTCTCT  
CCTTTACTTCTCCCTCTTCCTAGTCCTGATCCCAACAGCAGGTTGACTAGAGAATAA  
AGTCCTTGGATGAAAATATGATTTCAACTCTCATTACTCATATTATCAACCCACTAA  
CCTTTATTGTGCCTGTATTGCTAGCCGTAGCATTCCCTCACCCCTCCTTGAACGAAAAGT  
GCTAGGCTACATACAACTACGAAAAGGGCCAAACATTGTTGGGCCTTACGGCCTCCT  
TCAACCTATTGCTGATGGCGTAAAACCTCTTTATTAAAGAACCCATTTCGACCTTCAAC  
CGCATCACCCGTCCTATTCCTCGTAGCCCTATGCTCGCTCTCACACTAGCCCTAACC  
CTTTGAGCCCCCATACCTTTCCCGTACCCTGTCGTGGACCTTAACCTAGGTATTTTAT  
TTATTCTAGCTCTATCTAGCCTTGCAGTATATTCTATTCTGGGCTCCGGCTGAGCATC

TAATTCAAATATGCCCTAGTAGGGGCACTGCGGGCTGTCGCACAAACAATTTCTTA  
CGAAGTTAGCCTTGGACTIONCTTACTAAACATTATCATCTTCACCGGGGGCTTCAC  
ACTCCAAACCTTTAACACAGCCCAAGAGGCCATTTGACTGGTAGTGCCCGCTTGACC  
GCTGGCTGCCATATGATATATCTCCACTCTTGCCGAAACAAACCGTGACCCCTTCGA  
CTTAACAGAAGGAGAATCTGAACTTGTCTCGGGCTTCAACGTAGAGTACGCAGGGG  
GACCCTTCGCCTTGTTCTTCTTAGCCGAATATTCAAATATTCTCCTAATAAAATACCCT  
GTCCGCTACACTATTTTTAGGGGGCCTCCACATCCCATCTATCCCCGGAATTAAGTAGT  
ATCAATATTATGACTAAAGCAGCCCTTCTATCAATTGTCTTCTGTGGGTCCGAGCTT  
CGTACCCGCGATTCCGTTACGACCAACTTATGCACCTCATTTGAAAAAACTTTCTTCC  
ACTGACTTTGGCACTAGTTATCTGACACTTGGCGCTCCCTATTGCATTTCGCTGGTCTC  
CCACCACAACCTATAGATGAACCCCTACATCTTGACCACTCTTCTATTTGGTTTGGGCC  
TTGGAACAACACTCACGTTTGCAAGCTCACACTGGCTCCTCGCTTGAATAGGACTTG  
AGATTAATACTAGCCATTATTCCCCTAATAGCCCAACACCACCACCCCGGGCAG  
TCGAAGCTACTACTAAATACTTTCTCGCACAAGCCACAGCAGCCGCCACCCTCCTGT  
TTGCAAGCACTACCAACGCTTGACTCACAGGCCAGTGGGATATTCAACAGATAACA  
CATCCCCTCCCCACAACAATGATTGTTATTGCCCTCGCGCTAAAGGTTCGGACTGGCA  
CCAATGCACTCTTGACTCCCCGAAGTACTCCAAGGGCTAGACCTGACCACCGGGCTC  
ATCCTCTCAACCTGACAAAACTTGACCCCTTTGCCCTCTTACTACAAATTCAAACA  
ACAACCCTACGCCTCTAATCATTATTGGCTTACTATCCACTCTCGTTGGTGGCTGAGG  
TGGTCTCAACCAAACCCAGCTGCGCAAGGTCTCGCCTACTCCTCAATTGCCACCT  
TGGCTGAATAATGCTCATCCTTCAATTTTACCCCTCCTTGCCCTTCTCACCCCTCCTC  
ACGTACTTTCTATGACTTTCTCAGCATTCTAATTTTTAAAGTAAACAAAGCGACCA  
CCGTCAATGCCCTCGCCATCTCGTGAACAAAACTCCTGCCCTCACAGCCCTAGCAC  
CCCTGGTTTTACTTTCTCTCGGCGGCCTTCTCCCCTTACCGGCTTCATGCCCAAGTG  
ATTCATTCTTCAGGAAGTACTAAACAAGACCTTCCGCACTTGCCACCCTCGCCGCT  
TTAACTGCCCTCTTGAGTCTCTACTTCTACTTGCGCCTCTCGTATGCAATAACCCTCA  
CAATATCCCCAACAACCTAATTGGTGTCACTCCCTGACGATTCTACTCCCCCAATT  
TACACTTCCCCTCGCCGTCTCCACTGCAGCAACCACCCTTCTTCTCCCACTAGCCCCC  
GCTGCCGTAGCACTACTGGTCACCTATGAGCCTTCTCCTAACCATCATTTGATTGCC  
ACCCTCCTCTCGACAGTACTAGCCCTTGATCCTTTTGATTACCCCAAATTACACCAG  
ACCACGAAAAGCTATCGCCGTACGAGTGCGGCTTTGACCCAATAGGATCCGCCCCG  
CTGCCTTTTTACTGCGGTTTTCTCATCGCCATCCTCTTTCTTCTCTTCGATTTAGA  
AATTGCTCTCCTCCTCCCTCTTCCATGAGGAGACCAACTAGCATCGCCACTACTGAC  
GTTACCTGAGCTACAGCTGTCTTAGCCCTTCTAACCCTTGGCCTCATTTACGAATGA  
ATGCAAGGAGGTCTAGAATGGGCTGAATATGCTAAAAGTCCTAATCCCAACACTTA  
TGCTAATCCCAACAGCCTGGTTACTCAAACCCAGCTGACTCTGGCCCATGACTTTAA  
TGTATAGCTTTTGCATCTCCTTGGTTAGCCTTTTCATGACTAAAGAACCCTCTCAGAAAC  
CGGCTGATCGTCACTTAGCCTCTTTATAGCTACCGACTCCCTATCAACCCCCCTCCTC  
CTTCTTACATGCTGATTACTCCCACTAATAATTTTGGCAAGCCAAAAACACACAGCC  
TTAGAACCCTCTTAGTCGCCAGCGCATGTACATCACACTTCTCGCCTCCTCCAGTTTTT  
CCTAATCCTAGCATTTAGCGCCACCGAACTGGTAATGTTTTACGTAATATTTGAAGC  
CACCTCATCCCCACGCTAATCATTATCACCCGCTGAGGAAACCAAACAGAACGTCT  
AAACGCAGGAACCTACTTTCTTCTATACATTAGCGGGCTCACTCCCTCTTCTCGTT  
GCTTTACTCCTACTCCAAAACACATCCGGCACCCCTGTCGCTGTAAACCCTTCACTATA  
CGGACCCGCTCGCTCTCGTCTTATGCAGACAAACTATGATGAGCAGGCTGTCTTTTA  
GCATTCTGGTTAAAATACCCCTCTACGGGGTCCACCTATGGCTCCCTAAAGCCCAT  
GTTGAAGCCCAATTGCAGGCTCAATAATCCTTGACGCGGTTCTACTGAAGCTAGGG  
GGATACGGCATGATCCGCATAATAACAATATTGGAACCTCTAACTAAGGAGTTAAG  
CTACCCCTTCATTGTCTTTGCACTTTGAGGGGTAATTATAACTGGGTCAATTTGTCTA  
CGCCAGACAGACCTTAAGTCCCTAATTGCCTACTCCTCAGTCAGCCACATAGGCCTA  
GTGGCTGGAGGAATTCTTATCCAATCACCTGGGGCTTAACAGGGGGCTCTTACCCTC  
ATAATTGCACACGGGCTTACTTCATCAGCCCTCTTCTGCTTAGCAAACACAACTAT

GAACGAACCCACAGTCGAACGATAGTCCTGGCGCGAGGACTTCAAGTAGCCCTACC  
ACTAATAGCCACTTGATGATTTATTTCTAGCTTGGCCAACCTAGCTCTGCCACCACTA  
CCCAACCTCATGGGGGAGCTGATAATTATCACTTCTTTATTCAACTGGTCCTGATGA  
ACTCTGGCATTAAACCGGTGCAGGCACTCTAATCACAGCTGGTTACTCCCTTTACATA  
TTCTTAATAACTCAGCGGGGCCCTCTCCCAACACATGTCATTGCACTTGAGCCATCT  
CACACCCGAGAACACCTTCTTATTGCCTTCACCTCATCCCCTTAATTCTACTCGTACT  
TAAGCCCGAGCTGATCTGAGGCTGAACTGCCCATGACCCCCACACACTTTGCCTTCT  
CCTCAGCCTTTCTTCTGGGTTTAACAGGCCTGGCATTCCACCGGTTTCACCTCCTTTC  
CGCCCTATTGTGCCTTGAAGGAATAATACTATCCCTATTTATTGCTCTCTCCCTATGA  
ACGCTCCAACCTTGACTCAACCAACTTTTCAGCATCTCCAATACTTCTGCTTGCATTTT  
CAGCCTGCGAAGCAAGCGCCGGCCTCGCCCTATTAGTAGCCACTGCTCGAACCCAC  
GGGACCGACCGATTACAAAGCCTAAATCTTCTCCAATGCTAAATGTACCCACCTCC  
CTAATGATTTTCATCGAGCCTGATCACAATCTTTGCGTTACTAGCCTATCCTTTAATCA  
CCACGATCCGCCCTACACCTCGGGACCTCAATGGGCTACCACCCATGTCAAAACAG  
CTGTAAAAATAGCTTTCTTTGTTAGTCTGCTGCCTCTGACCCTATTTCTTAATGAGGG  
CGCAGAAACAATCGTTACTAACTGAACCTGAATAAAATACCAACTCCTTCAATGTCAG  
CATTAGCTTGAAATTTGATTTCTACTCAATTATTTTTACACCCATTGCCCTCTACGTA  
ACTTGATCCATCCTGGAGTTCGCATCATGGTATATGCACGCAGACCCACACATGAAC  
CGCTTCTTTAAATACCTCCTGACGTTTCTGATTGCCATAATCGTCCTAGTAACTGCAA  
ACAATATGTTTCAACTATTTATCGGTTGAGAGGGCGTGGGGATCATATCGTTCTTAC  
TTATTGGATGGTGGTTCGGACGGGCGGATGCTAACACTGCAGCGCTTCAAGCAGTAC  
TTTACAACCGAGTAGGGGACATCGGGCTTATCTTCGCCATGGCTTGAATAGCAGCAA  
ACCTAAACTCCTGGGAGATGCAACAAATCTTTGCAACCACCAAAGACATAGACTTA  
ACCTACCCTCTTCTCGGACTCATATTGCAGCAACTGGCAAATCGGCTCAATTCGGA  
CTTCACCCTTGACTACCCTCCGCTATGGAGGGTCCCACACCGGTCTCTGCCCTACTTC  
ATTCTAGCACTATGGTCGTTGCCGGCATTTTTCTGCTAGTACGAATAAGCCCGCTACT  
GGAAAACAACCAAACCGCCCTCACAACCTGCCTATGCCTCGGAGCTCTTACAACACT  
ATTCAGTCAACCTGTGCCCTCACGCAAAATGATATTAATAAAAAATCGTCGCATTCTC  
TACATCCAGCCAGCTTGGGCTTATAATGGTAACCATTTGGTCTAAACCAGCCACAAC  
AGCATTTCTTCACATCTGTACACATGCCTTCTTCAAGGCCATACTATTTTTATGCTCC  
GGATCTATTATCCACAGCCTAAATGATGAACAAGATATCCGGAAAATAGGGGGCAT  
ACACCACCTTGCACCTTTCACATCCTCTTGCCTAACTATTGGCAGCCTCGCCCTCACA  
GGAACCCCTTCTTGGCTGGCTTCTTCTCTAAAGATGCCATCATCGAAGCATTGAAC  
ACATCCCACCTAAACGCCTGAGCCCTAACCTTAACCTCCTAGCCACCTCTTTCACA  
GCAATCTACAGCTTTCGAGTAGTATTTTTTTGTACCCATGGGGCCACCCCGATTTAGTC  
CCTCTCTCCGATCAACGAAAACAACCCAGCAGTGATTAACCCACTTAAGCGACTAGC  
ATGGGGGAGTATCGTTGCAGGCTTACTAATTACCTCTAATATTACACCCTTGAAAAC  
CCCTGTCATATCTATACCTCCCCTCCTTAAACTAGCTGCTCTTGCAGTCACAATCATC  
GGCCTTCTTGTGCTATAGAGCTCGCCATGTTAACCAACAAACAATATGAGCCAATA  
CCCAACACGACATACACCACTTCTCTGCCTTATTAGGCTTCTTCCCCGGGGTTATACA  
CCGCCTAACCCCTGTATTGCTCTTCTTCTAGGCCAAAACATTGCTAACCAACAGT  
AGATCAGACATGATTAGAAAAAACGGGGCCCCAAAGCCATTGAAGCCGCTAACCGAC  
CTCTCGTCTCCTCTACAAGTAACATTCAACGGGGGGTAATCAAAACATATCTCCCCT  
CTTCCTCCTTACACTAGCCCTTATAATCCCCCTATTCATCACCTAATGACTTTTCGCTA  
TATATTTAGTTTTATTTTCTCTTGTGTTGGGGTTAGTTGCAGTTGCTTCTAATCCGTCC  
CCTTATTTTGCTGCTTTGGGTTTGGTTGTGGTAGCTGGCATGGGGTGTGGTATATTAG  
TCGGGCATGGAGGGGCCCTTTTTGTCACTAGTCTTGTCTTAATTTACTTAGGCGGGAT  
GTTAGTTGTATTTGCATATTCAGCAGCGTTAGCTGCTGAGCCGTACCCAGAGAGCTG  
GGGTAGTTGGTCGGTAATGGTATACGGTTGTCTACACAGGGGGAGTATTATAGTTTC  
CGGGCTGTTTTGAGGGGGGTGGTATGAATCTTCTTGGGTTCTAGCAGATGAGTTAGG  
GGAGTTTTCCGTGTTTCGAGGTGATATTGGAGGGGTAGCCTTAATACTCTTCTGG

GGGGTGGTTGTTAATCACTAGTGCATGGGTATTGCTTTTAACTTTATTTGTAGTCCTT  
GAGTTAACCGGGGTATGAGTCGAGGGGCGTTGCGACGGTTT  
Hippoglossus\_stenolepis\_AM749126  
ATGATACTAAGCTTCTTTGACCAATTTATATCCCCTTCATACCTCGGCATCCCCTAA  
TTGCTCTAGCGATTAGCCTGCCTTGAATTCTGTTCCCAACCCCGCAAGCCGCTGATTA  
AACAAACCGCGTACTAACGCTTCAAGGGTGATTTATTAGCCGCTTCACCTCGCAACTT  
CTTCTACCCCTAAACCCCGGAGGCCACAAGTGGGCAGTTCTATTACCTCGTTAATG  
TTTTCTTTTCTATCAACATACTAGGACTCCTTCCATACACCTTCACACCAACGACCC  
AACTCTCCCTTAATATAGGCCTCGCAGTACCCCTTTGATTAGCAACTGTCATTATGG  
GATACGAAATCAACCAACGCATGCCCTAGGCCACCTTCTTCCAGAAGGCACCCCCA  
CTGCCCTCATCCCTGTACTTATTATCATTGAAACAATTAGCCTATTCATTTCGACCCCT  
CGCTCTCGGTGTCCGACTAACAGCAAATCTCACAGCAGGCCACCTCCTTATTCAACT  
CATTGCAACAGCTGCCTTCGTCTTCTTCCCCTCATACCTGTTGTTGCTATCTTAACA  
ACGGTGGTCCCTCTTCCCTCCTCACCTACTAGAAGTAGCCGTTGCCATGATTCAAGCTT  
ATGTCTTTGTTCTACTCCTAAGCCTATATCTACAAGAGAACGTTTAAATGCCTCAACTG  
AACCCCGCACCTGATTTGCAATTTTAGTTTTCTCTTGAATAATCTTTTTAACTGTTA  
TTCCCCCAAAGTTTTAGCACACACCTATCCTAATGAACCCACCTCCCAAAGCACAC  
AAAAACAAAACAGAGCCCTGAAACTGACCATGATACTAAGTGGCAATCACACGTTG  
ATTTTTCTCGACCAATCACAAAGACATCGGCACCCTCTATCTCGTATTTGGTGCCTGA  
GCCGGAATAGTGGGGACAGGCCTAAGTCTGCTTATTCGGGCAGAACTAAGCCAACC  
CGGGGCTCTCCTGGGAGACGACCAAATTTATAATGTAATCGTCACCGCACACGCCTT  
TGTAATAATCTTTTTTATAGTAATACCCATTATGATTGGGGGGTTCGGAAACTGGCTT  
ATTCCACTAATAATTGGGGCCCCAGATATGGCGTTCCCTCGAATGAATAACATGAGT  
TTCTGACTTCTTCCCCCTCCTTCTCCTCCTTACGCTCTTCAGGTGTTGAAGCCGG  
AGCAGGTACCGGATGAACCGTATACCCCCCACTAGCTGGCAATTTAGCCCACGCCG  
GGGCATCCGTAGACCTGACAATCTTCTCACTTCACCTTGACGGAATTTTCATCAATTCT  
GGGGGCAATTAACCTTTATTACTACTATCATTAAACATGAAACCCACAACAGTCACTAT  
GTACCAAATCCCCTTATTTGTTTGAGCCGTTCTTATTACAGCCGTACTTCTTCTTCTAT  
CCCTGCCCCGTTTTAGCCGCAGGAATTACAATACTACTGACAGACCGCAACCTTAACA  
CGACCTTCTTTGACCCTGCCGGAGGAGGTGACCCCATCCTCTACCAGCACCTATTCT  
GATTCTTTGGTACCCAGAGGTATACATTCTTATTCTCCCGGGCTTCGGAATAATTC  
TCACATTGTTGCATACTATGCAGGTAAGAAAGAACCTTTTGGCTACATGGGGATAGT  
CTGAGCCATAATGGCCATTGGACTCCTGGGGTTCATTGTCTGGGCCCATCACATATT  
TACAGTCGGAATAGATGTAGATACACGAGCCTACTTTACCTCTGCCACAATAATCAT  
TGCGATTCCAACCTGGCGTAAAAGTCTTTAGCTGACTCGCAACCCTCCATGGAGGAAG  
CATTAAATGAGAAACACCCCTTCTATGAGCCCTCGGCTTTATTTTTCTCTTTACAGTA  
GGCGGTCTCACTGGCATCGTCTTAGCTAACTCCTCTCTCGATATTGTTCTGCATGACA  
CATACTATGTAGTCGCTCACTTCCACTATGTACTATCTATGGGTGCTGTATTTGCAAT  
CGTTGCCGCCTTCGTCCACTGGTTTCCATTATTTACAGGCTATACCCTTCACTCCACA  
TGAACAAAAATCCACTTCGGCCTGATATTTATTGGAGTCAATCTAACATTCTTCCCC  
CAACATTTTCTGGGCCTGGCCGGAATACCCCGACGGTACTCAGACTACCCAGATGCA  
TACACCCTTTGAAACACTGTTTCATCAATCGGGTCCCTAATGTCCCTCGTTGCTGTAA  
TTTTATTTTTATTTCATTATTTGAGAAGCATTACAGCCAAACGAGAAGTCGGAGCAG  
TAGAACTAACTGCAACTAACATTGAATGACTTTACGGCTGCCCTCCGCCCTACCACA  
CATTTGAAGAGCCCGCATTCGTACAAGTTCGTATAAACTAAATGGCACATCCCTCAC  
AACTCGGATTTCAAGACGCAGCTTCACCCTTAATAGAAGAACTACTTCACTTCCACG  
ACCACGCCTTAATAATTGTAATTCTCATTAGCACAAATAGTACTTTATATTATTGCGGC  
TATAGTCACAGCCAACTAACAGATAAACTTGTACTAGACTCTCAAGAAATTGAAA  
TTATCTGAACAGTTCTCCAGCTGTTATTCTTATCCTTATCGCCCTACCATCCATCCG  
AATTTTGTACTTAATAGACGAAATTAATGACCCCCACCTGACAATTAAGCCATTGG  
CCACCAGTGATACTGAAGCTACGAATACACAGACTACGAAGACCTCGGTTTTGACTC  
ATACATAATCCCCACACAAGACCTGACCCCCGGACAATTCCGACTACTAGAAGCAG

ACCACCGAATAGTAATCCCGGTAGAATCCCCAATTCGCGTTTTAATCTCGGCTGAAG  
ATGTCTTACATTCTGTTGGGCAGTCCCCTCTCTAGGCGTAAAAGTTGACGCCGTACCTG  
GACGATTGAACCAAGCAACCTTTATTGTTAGCCGACCAGGCGTATTTTTTCGGACAAT  
GTTCTGAGATTTGCGGGGCTAACCATAGTTTTATACCCATTGTTGTAGAAGCAGTCC  
CCCTTGAACACTTTGAGAACTGGTCTTCACTAATAATTGAAGACGCCTATGGCCCAT  
CAAGCACACCCATACCACATAGTCGACCCCAGCCCATGACCCCTAACAGGGGCTAT  
TGCTGCCCTATTGATAACATCTGGCCTTGCTATCTGATTCCACTTCCACTCCACAACC  
CTGATAACTATTGGGACAATCCTTCTCACCTTAACAATCTTCCAATGATGACGGGAC  
GTCGTACGGGAAGGCACATTTCAAGGACACCACACTCCCCCGTTCAAAAAGGCCT  
CCGATATGGAATAATTTTATTTATTACCTCAGAAGTCCTATTCTTCTTAGGCTTCTTC  
TGAGCCTTTTACCATTCAAGCCTAGCACCTACCCCTGAACTAGGCGGCTTCTGACCA  
CCGGCAGGCATTACTCCCTTAGACCCCTTTGAAGTCCCATTCTTAACACAGCAGTC  
CTGCTTGCCCTCTGGCGTAACTGTTACCTGAGCACACCACAGCATTATAGAGGGTAAA  
CGAAAACAACTATTCAATCTCTTGCTCTTACAATCTTACTCGGGGGGTACTTCACTT  
TCCTTCAAGGCCTAGAGTATCACGAAGCCCCCTTACCATTGCAGACGGAGTTTACG  
GCGCTACATTCTTTGTTGCCACCGGCTTCCACGGACTACACGTCTTAATTGGCACGTC  
ATTCTTAGCCGTTTGTCTATTACGCCAAATTCTTACCATTTCACATCAAACCACCAC  
TTTGGGTTTGAAGCAGCCGCATGATACTGACACTTCGTAGACGTCGTCTGACTTTTC  
CTCTATATCTCTATTTACTGATGAGGATCTTAATGGCCAGTCTACGTAAATCCCACCC  
TCTTCTAAAAATCGCAAACGATGCTTTAGTCGACCTCCCAGCCCCCTCTAATATCTCT  
GTTTGATGAACTTTGGGTCTCTTTTAGGACTCTGTTTAATTACCCAAATTGCAACCG  
GCTTATTTCTAGCCATACACTACACATCAGACATTGCTACTGCCTTCACCTCCGTAGC  
CCACATCTGTCGAGACGTCAACTACGGCTGACTTATCCGAAGCATTATGCCAACGG  
CGCATATTCTTTTTCATTTGCCCTCTACCTTCATATTGGCCGAGGTCTATACTATGGC  
TCTTACCTCTATAAAGAAACATGAACTGTTGGGGTTATTCTCCTCCTTCTCGTAATAA  
TAACAGCCTTCGTTGGATACGTCTCCCTTGAGGACAAATGTCGTTTTGAGGTGCAA  
CCGTTATTACCAACCTTCTATCTGCCGTCCCCTACGTCCGAAACACCCTGGTCCAAT  
GGATCTGAGGTGGTTTTTCTGTAGACAATGCTACCCTCACCCGGTTCTTTGCCTTCCA  
CTTTCTCTTCCCCTTCATCATCGCTGCCGCAACGTTAATTCATCTACTCTTTCTTCACG  
AAACTGGCTCAAACAACCCAACCGGGCTAAACTCAGACTCCGACAAAGTTCCTTTTC  
ACCCCTACTTCACTTACAAGGACCTCTTGGCTTTGCAGTCCTTCTTACTGCATTAGCA  
TCCCTAGCCCTATTTTCCCCAAATCTCTTAGGAGACCCAGATAACTTTACCCCTGCAA  
ATCCGCTTGTTACTCCCCACACATTAAGCCAGAGTGATACTTCCTGTTTGCCTATGC  
TATTCTCCGCTCCATCCCAAACAACTTGAGAGGAGTACTTGCCCTTTTATTCTCAATC  
TTAGTTCTTATGCTCGTCCCCTTCCTTCATACCTCTAAACAACGAAGCCTGATATTCC  
GTCCCCTAACACAATTTTTGTTCTGATCTTTAGTAGCAGACGTTATGATTCTAACTTG  
AATTGGAGGAATGCCCGTAGAACACCCCTTCGTTATCATTGGGCAAGTAGCGTCTCT  
CCTTTACTTCTCCCTCTTCCTAGTCCTGATCCCAACAGCAGGTTGACTAGAGAATAA  
AGTCCTTGGATGAAAATATGATTTCAACTCTCATTACGCATATTATCAACCCACTAA  
CCTTTATTGTACCTGTATTGCTAGCCGTAGCATTCCCTACCCTCCTTGAACGAAAAGT  
GCTAGGCTACATACAACTCCGAAAAGGGCCAAACATCGTAGGGCCTTACGGCCTCC  
TTCAACCTATTGCTGATGGTGTAACACTCTTTATTAAAGAACCCATTCGACCTTCGA  
CCGCATACCCGTCTTATTCCTCCTGGCCCCCTATGCTCGCTCTCACACTAGCCCTAAC  
CCTTTGAGCCCCCATACTTTCCCGTACCCTGTCGTGGACCTTAACCTAGGTATTTTA  
TTTATTCTAGCCCTATCTAGCCTTGCAGTATATTCTATTCTGGGGCTCCGGCTGAGCAT  
CTAATTCAAAATATGCCCTAGTAGGGGCACTGCGGGCTGTCGCACAAACAATTTCTT  
ACGAAGTCAGCCTTGGAATCATCTTGCTAAACATTATCATCTTTACCGGAGGCTTCA  
CACTTCAAACCTTTAACACAGCCCAAGAGGCCATTTGACTAGTAGTGCCCGCTTGAC  
CACTGGCTGCCATATGATATATCTCCACTCTTGCCGAAACAAACCGTGCACCCTTCG  
ACTTAACAGAAGGAGAGTCTGAACTTGTCTCGGGCTTCAACGTAGAGTACGCAGGC  
GGACCCTTCGCCTTGTTCTTCTTGGCCGAATATTCAAATATTCTCCTAATAAATACCC  
TGTCCGCTACACTATTTTTAGGGGCCTCCCACATTCCATCTATCCCAGAATTAACCAG

TATCAATATTATGACTAAAGCAGCCCTTCTGTCAATTGTCTTCCTATGAGTCCGAGCT  
TCGTACCCGCGATTCCGTTACGACCAACTTATGCACCTCATTTGAAAAAACTTTCTTC  
CACTGACTTTGGCACTAGTTATCTGACACTTGGCGCTCCCTATTGCATTGCTGGTCT  
CCCACCACAACCTATAGATGAACCCCTACATCTTGACCACTCTTCTATTTGGTTTGGGC  
CTAGGAACAACACTCACGTTTGCAAGCTCACACTGGCTTCTCGCTTGAATAGGACTT  
GAGATTAATACTAGCCATTATTCCCCTAATAGCCCAACATCACCACCCCCGGGCA  
GTCGAAGCTACCACTAAGTACTTTCTCGCACAAGCCACAGCAGCCGCCACCCTCCTG  
TTTGCGAGTACTACCAACGCTTGACTCACAGGCCAATGGGACATTCAACAGATAAC  
ACACCCCCTCCCAACAACAATGATTGTTATTGCCCTCGCACTAAAAGTCGGACTGGC  
ACCAATGCACTCTTGACTTCCCGAAGTACTCCAAGGACTAGACCTAACCACGGGACT  
TATCCTCTCAACCTGACAAAACTTGCACCCTTTGCCCTCTTACTACAAATTCAGAC  
AACAAACCCTACGCCTCTAATCATTATTGGCTTACTATCCACGCTCGTTGGTGGCTGA  
GGTGGTCTCAACCAAACCCAGTTACGCAAAGTCCTCGCCTACTCCTCAATTGCCAC  
CTTGGCTGAATAATGCTGATCGTTCAATTTTCACCCCTCCTTGCCCTTCTCACCCCTCC  
TCACGTACTTTCTATGACTTTCTCAGCATTCTTAATTTTAAAGTAAATAAAGCCACC  
ACTGTCAATGCCCTCGCAATCTCGTGAACAAAGACTCCTGCCCTCACAGCCCTAGCA  
CCCCTGGTTTTACTATCCCTCGGCGGCCTTCCCCCCTTACCGGCTTCATACCCAAGT  
GATTTATTCTTCAGGAAGTACTAAGCAAGACCTTCCACACTTGCCACCCTCGCCGC  
TTTAACTGCCCTCTTGAGTCTCTACTTCTACCTCCGTCTCTCATATGCAATAACCCTC  
ACAATATTCCCCAACAACCTCATTGGCGTCACTCCCTGACGATTCTACTCCCCCAA  
TTTACGCTTCCCCTCGCCGTCTCCACTGCAGCAACCACCCTTCTCCTCCCCTAGCCC  
CCGCTGCCGTAGCACTACTGGTCACCTATGAGCCTTCTTCTAACCATCATTTTCGATTG  
CCACCCTCCTCTCGACAGTACTTGCCCTTGTGTCCTTTTGATTACCCCAAATTACACC  
AGACCACGAAAACTATCACCTTACGAGTGC GGCTTTGACCCGATAGGATCCGCCC  
GGCTGCCTTTTTTCACTGCGGTTTTTCTCATCGCCATCCTCTTTCTTCTATTTCGATTTA  
GAAATTGCTCTCCTCCTCCCTCTTCCATGAGGTGACCAACTAGCATCACCCTACTG  
ACATTCACCTGAGCTACAGCTGTCCTAGCCCTTCTAACCCTTGGCCTCATTTACGAAT  
GAATGCAAGGGGGTCTAGAATGGGCGGAATATGCTAAAAGTCCTAATCCCAACACT  
TATGCTAATCCCAACAGCCTGGTTACTCAAACCCAACTGACTCTGACCCATGACTTT  
AATGTATAGCTTTTGCATCTCCTTGGTCAAGCCTTTCTGTGACTAAAAAACCTCTCAGA  
AACC GGCTGATCGTCACTTAGCCTCTTTATAGCTACCGACTCCCTATCGACCCCCCTC  
CTCGTTCTTACATGCTGATTACTCCCCTAATAATTTTGGCAAGCCAGAAACACACA  
GCCTTAGAACCTCTTAGTCGCCAGCGCATGTACATCACACTTCTCGCCTCCTCCAGTT  
CTTCCTAATCCTAGCATTTAGCGCCACCGAACTGGTAATGTTTTACGTAATATTTGAA  
GCCACCCTTATCCCCACGCTAATCATTATCACCCGCTGAGGAAACCAAACAGAACGT  
CTAAACGCAGGAACCTACTTTCTCTTCTATACATTAGCGGGGCTCACTCCCCCTTCTCG  
TTGCTTTACTCCTACTCCAAAACACATCCGGCACCCCTATCGTTGTTAACCTTCACTA  
TACGGACCCGCTCGCTCTCGTCTTATGCAGACAACTATGATGAGCAGGCTGTCTTT  
TAGCATTCTGGTTAAAATACCCCTCTACGGGGTCCACCTATGGCTCCCTAAAGCCC  
ATGTTGAAGCTCCAATTGCAGGCTCAATAATCCTTGCAGCAGTTCTACTGAAGCTAG  
GGGGATACGGCATGATCCGCATGATAACGATATTGGAACCTCTAACTAAGGAATTA  
AGCTACCCCTTCATTGTCTTTGCACTTTGAGGGGTAAATTATAACTGGCTCAATTTGTC  
TACGCCAGACAGACCTTAAGTCCTTAATTGCCTACTCATCAGTCAGCCACATGGGCC  
TAGTGGCTGGGGGAATTCTTATTCAATCACCCCTGAGGCTTAACAGGAGCCCTCACCC  
TCATAATTGCACACGGTCTTACTTCATCAGCCCTCTTCTGCTTGGCAAACACAACT  
ATGAACGAACCCACAGTCGAACAATGGTCCTGGCGCGAGGACTTCAAGTAGCCCTA  
CCACTAATAGCCACTTGGTGGTTTATTTCTAGCTTGGCCAACCTAGCTCTGCCACCAC  
TACCCAACCTCATGGGGGAGCTGATAATTATCACTTCTTTATTCAACTGGTCCTGGT  
GAACTCTGGCATTAAACGGGTGCAGGCACTCTAATCACAGCTGGTTACTCCCTTTACA  
TATTCTTAATAACTCAACGGGGGCCCTATCCCAACACATGTCATTGCACTTGAACCAT  
CTCACACCCGAGAACACCTTCTTATTGCCTTCACCTTATCCCCTTAATTCTGCTCGTA  
CTTAAGCCCGAGCTGATCTGAGGCTGAACTGCCTATGACCCCCACACACTTTGCCTT

CTCCTCAGCCTTTCTTCTGGGTTTAACAGGCCTGGCATTCCACCGGTTTCACCTCCTT  
TCCGCTCTATTGTGCCTTGAAGGAATAATACTATCCCTATTTATTGCTCTTTCCCTAT  
GAACGCTACAACTTGACTCAACCAACTTTTCAGCATCTCCAATACTTCTGCTTGCATT  
TTCAGCCTGCGAAGCAAGCGCCGGTCTCGCCCTATTAGTAGCCACTGCTCGAACCCA  
CGGGACCGACCGATTACAAAGCCTAAATCTTCTCCAATGCTAAATGTACCCACCTC  
CCTAATGATTTTCATCGAGCCTGATCACAATCTTTGCATTACTAGCCTATCCTTTAATC  
ACCACGATCCGTCCTACACCTCGAGGCCCTCAATGAGCTACCACCCATGTCAAAACA  
GCTGTAAAAATAGCTTTCTTTGTTAGTCTGCTACCTCTGACCCTATTTCTTAATGAGG  
GCGCAGAAACAATCGTTACTAATTGAACCTGAATAAATACTAACTCCTTCAATATCA  
ACATTAGCTTGAAATTTGATTTCTACTCAATTATTTTTACACCCATTGCCCTCTACGT  
AACTTGGTCCATCCTGGAGTTCGCATCATGATACATGCACGCAGACCCACACATGAA  
CCGCTTCTTTAAATACCTCCTGACGTTTCTGATTGCCATAATCGTCCTAGTAACTGCA  
AACAAATATGTTTCAACTATTTATCGGCTGGGAGGGAGTGGGGATCATATCGTTCTTA  
CTTATTGGATGGTGGTTCGGACGGGCGGATGCTAACACTGCAGCGCTTCAAGCAGTA  
ATTTACAACCGAGTAGGAGACATCGGACTTATCTTCGCCATGGCTTGAATAGCAGCA  
AACCTTAACTCCTGAGAGATACAACAAATCTTTGCAACCACCAAGGACATAGACTT  
AACCTACCCTCTTCTCGGACTCATCATTTGCAGCAACTGGCAAATCGGCTCAATTCGG  
ACTTCACCCTTGACTACCCTCCGCTATGGAGGGTCCACACCCGGTCTCTGCCCTACTT  
CATTCTAGCACTATGGTCGTTGCCGGCATTTTCTGCTAGTACGAATAAGCCCCCTCC  
TGGAACAACAACCAACCGCCCTCACAACCTGCCTATGCCTCGGAGCTCTTACAACAC  
TATTCATGCAACCTGTGCCCTCACGCAAAATGATATTAAAAAATCGTCGCATTCT  
CTACATCCAGCCAGCTTGGGCTTATAATGGTAACCATTGGTCTAAACCAACCACAAC  
TAGCATTTCTTCACATCTGTACACATGCCTTCTTTAAAGCCATACTGTTTTTATGCTC  
CGGATCTATTATCCACAGCCTAAATGATGAACAAGATATCCGCAAAATAGGGGGCA  
TACACCACCTTGACCTTTACATCCTCTTGCCTAACTATTGGCAGCCTCGCCCTCAC  
AGGAACCCCTTCTTGGCTGGCTTCTTCTCTAAAGATGCCATCATCGAAGCATTGAA  
CACATCCCACCTAAACGCCTGAGCCCTAACCTTAAACCCTCCTAGCCACCTCTTTCAC  
AGCAATCTACAGCTTTCGAGTAGTATTTTTTGTACCCATGGGGCCACCCCGATTAGT  
CCCTCTCTCCGATCAACGAAAACAACCCAGCAGTAATTAACCCACTTAAGCGGCTAG  
CATGGGGAAGTATCGTTGCAGGCTTACTAATTACCTCTAATATTACACCCTTAAAAA  
CCCCTGTCATATCCATGCCTCCTCTCCTTAACTAGCTGCTCTTGCAGTTACAATCAT  
CGGCCTTCTTGTTGCTATAGAGCTCGCCATATTAACCAACAAGCAATATGAGCCAAT  
ACCCGGCACGACATACACCCTTCTCTGCCTTATTAGGCTTCTTCCCCGGGGTCATA  
CACCGCCTAACCCCTGTATTGCTCTTCTTCTCCTAGGCCAAAATATTGCTAACCAACA  
GTAGATCAGACATGATTAGAAAAAACAGGCCCCCAAAGCCATTGAATCCGCTAACCG  
ACCTCTAGTGTCTCTACAAGTAATATTCAACGGGGGGTGATCAAAACATATCTTCC  
CTCTTCTCCTAACACTAGCCCTTATAATCCCCATATTCATCACCTAATGACTTTCGC  
TATATATTTAGTTTTATTTTCTCTTGTGTTGGGGTTAGTTGCAGTTGCTTCTAATCCGT  
CCCCTTATTTTGCTGCTTTGGGTTTGGTTGTGGTAGCTGGCATGGGGTGTGGTATATT  
AGTTGGGCATGGAGGGGCCCTTTTGTCACTAGTCCTGTTCTTAATTTACTTAGGCGGG  
ATGTTAGTTGTATTTGCATATTCAGCAGCGTTAGCTGCTGAGCCGTACCCAGAGAGC  
TGGGGTAGTTGGTCGGTAATGGTCTACGGTTGTCTATACAGGAGGAGTATTATAGTT  
TCTGGATTGTTTTGAGGGGGGTGGTATGAATCTTCTTGGGTCTTAGCAGATGAGTTG  
GGGGAGTTTTCCGTATTTTCGAGGGGATATCGGAGGGGTAGCCTTAATACTCTTCT  
GGGGGGTGGTTGTTAATCACTAGTGCATGGGTATTGCTCTTAACTTTGTTTGTAGTCC  
TTGAGTTAACCGGGGTATGAGCCGAGGGGCGTTGCGACGGTTT

Hippoglossus\_stenolepis\_AM749127

ATGATACTAAGCTTCTTTGACCAATTTATATCCCCTTCATACCTCGGCATCCCCTAA  
TTGCACTAGCGATTAGCCTGCCTTGAATTCTGTTCCCAACCCCAACAAGCCGCTGATT  
AAACAACCGCGTACTAACACTTCAAGGGTGATTTATTAGCCGCTTCACCTCGCAACT  
TCTTCTACCCCTAAACCCCGGAGGCCACAAGTGGGCAGTTCTATTACCTCGTTAAT  
GTTTTCTTTTCTATCAACATGCTAGGACTCCTTCCATACACCTTCACACCAACGACC



CAACTCTCCCTTAATATAGGCCTCGCAGTACCCCTTTGATTAGCAACTGTCATTATGG  
GATACGAAATCAACCAACGCATGCCCTAGGCCACCTTCTTCCAGAAGGCACCCCCA  
CTGCCCTCATCCCTGTACTTATTATCATTGAAACAATTAGCCTATTCATTGACCCCT  
CGCTCTCGGTGTCCGACTAACAGCAAATCTCACAGCAGGCCACCTCCTTATTCAGCT  
CATTGCAACAGCTGCCTTCGTCCTTCTTCCCCTCATACCTGTTGTTGCTATCTTAACA  
ACGGTGGTCCTCTTCCTCCTCACCTACTAGAAGTAGCCGTTGCCATGATTCAAGCTT  
ATGTCTTTGTTCTACTCCTAAGCCTATATCTACAAGAGAACGTTTAAATGCCTCAACTG  
AACCCCGCACCTGATTTGCAATTTTAGTTTTTCTCTTGAATAATCTTTTTAACTGTTA  
TTCCCCCAAAGTTTTAGCACACACCTATCCTAATGAACCCACCTCCCAAAGCACAC  
AAAAACAAAACAGAGCCCTGAAACTGACCATGATACTAAGTGGCAATCACACGTTG  
ATTTTTCTCGACCAATCACAAAGACATCGGCACCCTCTATCTCGTATTTGGTGCCTGA  
GCCGGAATAGTGGGGACAGGCCTAAGTCTGCTTATTCGGGCAGAACTAAGCCAACC  
CGGGGCTCTCCTGGGAGACGACCAAATTTATAATGTAATCGTCACCGCACACGCCTT  
TGTAATAATCTTTTTTATAGTAATACCCATTATGATTGGGGGGTTTCGGAAACTGGCTT  
ATTCCACTAATAATTGGGGCCCCAGATATGGCGTTCCCTCGAATGAATAATATGAGT  
TTCTGACTTCTTCCCCCTCCTTTCTCCTCCTCTTAGCCTCTTCAGGTGTTGAAGCCGG  
AGCAGGTACCGGATGAACCGTATACCCCCCACTAGCTGGCAATTTAGCCACGCCG  
GAGCATCCGTAGACCTGACAATCTTCTCACTTCACCTTGCAGGAATTTTCATCAATTCT  
GGGGGCAATTAACCTTTATTACTACTATCATTAAACATGAAACCCACAACAGTCACTAT  
GTACCAAATCCCCTTATTTGTTTGAGCCGTTCTTATTACAGCCGTACTTCTTCTTCTAT  
CCCTGCCCCGTTTTAGCCGCAGGAATTACAATACTACTAACAGACCGCAACCTTAACA  
CGACCTTCTTTGACCCTGCCGGAGGAGGTGACCCCATCCTCTACCAGCACCTATTCT  
GATTCTTTGGTCACCCAGAGGTATACATTCTTATTCTCCCGGGCTTCGGAATAATTTCT  
TCACATTGTTGCATACTATGCAGGTAAGAAAGAACCTTTTGGCTACATGGGGATAGT  
CTGAGCTATAATGGCCATTGGACTCCTGGGGTTCATTGTCTGGGCCCATCACATATT  
TACAGTCGGAATAGATGTAGATACACGAGCCTACTTTACCTCTGCCACAATAATCAT  
TGCGATTCCAACCTGGCGTAAAAGTCTTTAGCTGACTTGCAACCCTCCATGGAGGAAG  
CATTAAATGAGAAACACCCCTTCTATGAGCCCTCGGCTTTATTTTCTCTTTACAGTA  
GGCGGTCTCACTGGCATTGTCTTAGCTAACTCCTCTCTCGATATTGTTCTGCATGACA  
CATACTATGTAGTCGCTCACTTCCACTATGTACTATCTATGGGTGCTGTATTTGCAAT  
CGTTGCCGCCTTCGTCCACTGGTTTCCATTATTTACAGGCTATACCCTTCACTCCACA  
TGAACAAAAATCCACTTCGGCCTGATATTTATTGGAGTCAATCTAACATTCTTCCCC  
CAACATTTTCTGGGCCTGGCCGGAATACCCCGACGGTACTCAGACTACCCAGATGCA  
TACACCCTTTGAAACACTGTTTCATCAATCGGGTCCCTAATGTCCCTCGTTGCTGTAA  
TTTTATTTTATTTCATTATTTGAGAAGCATTACAGCCAAACGAGAAGTCGGAGCAG  
TAGAACTAACTGCAACTAACATTGAATGACTTTACGGCTGCCCTCCGCCCTACCACA  
CATTTGAAGAGCCCGCATTTCGTACAAGTTCGTATAAACTAAATGGCACATCCCTCAC  
AACTCGGATTTCAAGACGCAGCTTCACCCTTAATAGAAGAACTACTTCACTTCCACG  
ACCACGCCTTAATAATTGTAATTCTCATTAGCACAAATAGTACTTTATATTATTGCGGC  
TATAGTCACAGCCAACTAACAGATAAACTTGTACTAGACTCTCAAGAAATTGAAA  
TTATCTGAACAGTTCTCCAGCTGTTATTCTTATCCTTATCGCCCTACCATCCATCCG  
AATTTTGTACTTAATAGACGAAATTAATGACCCCCACCTGACAATTAAGCCATTGG  
CCACCAGTGATACTGAAGCTACGAATACACAGACTACGAAGACCTCGGTTTTGACTC  
ATACATAATCCCCACACAAGACCTGACCCCTGGACAATTCCGACTACTAGAAGCAG  
ACCACCGAATAGTAATCCCGGTAGAATCCCCAATTCGCGTTTTAATCTCGGCTGAAG  
ATGTCTTACATTCTGGGCAGTCCCCTCTCTAGGCGTAAAAGTTGACGCCGTACCTG  
GACGATTGAACCAAGCAACCTTTATTGTTAGCCGACCAGGCGTATTTTTCGGACAAT  
GTTCTGAGATTTGCGGGGCTAACCATAGTTTTATACCCATTGTTGTAGAAGCAGTCC  
CCCTTGAACACTTTGAGAAGTGGTCTTCACTAATAATTGAAGACGCCTATGGCCCAT  
CAAGCACACCCCTACCACATAGTCGACCCAGCCCATGACCCCTAACAGGGGCTATT  
GCTGCCCTATTGATAACATCTGGCCTTGCTATCTGATTCCACTTCCACTCCACAACCC  
TGATAACTATTGGGACAATCCTTCTCACCTTAACAATCTTCCAATGATGACGGGACG

TCGTACGGGAAGGCACATTTCAAGGACACCACACTCCCCCGTTCAAAAAGGCCTC  
CGATATGGTATAATTTTATTTATTACCTCAGAAGTCCTATTCTTCTTAGGCTTCTTCT  
GAGCCTTTTACCATTCAAGCCTAGCACCTACCCCTGAGCTAGGCGGCTTCTGACCAC  
CGGCAGGCATTACTCCCTTAGACCCCTTTGAAGTCCCCTTCTTAACACAGCAGTCC  
TGCTTGCCTCTGGCGTAACTGTTACCTGAGCACACCACAGCATTATAGAGGGTAAAC  
GAAAACAACTATTCAATCTCTTGCTCTTACAATCTTACTCGGGGGGTACTTCACTTT  
CCTTCAAGGCCTAGAGTATCACGAAGCCCCCTTACCATTGCAGACGGAGTTTACGG  
CGCTACATTCTTTGTTGCCACCGGCTTCCACGGACTACACGTCTTAATTGGCACGTCA  
TTCTTAGCCGTTTGTCTATTACGCCAAATTCTTACCATTTCACATCAAACCACCACT  
TTGGGTTTGAAGCAGCCGCATGATACTGACACTTCGTAGACGTCTGCTGACTTTTCC  
TCTATATCTCTATTTACTGATGAGGATCTTAATGGCCAGTCTACGTAAATCCCACCCT  
CTTCTAAAAATCGCAAACGATGCTTTAGTCGACCTCCCAGCCCCCTCTAATATCTCT  
GTTTGATGAACTTTGGGTCTCTTTTAGGACTCTGTTTAATTACCCAAATTGCAACCG  
GCTTATTTCTAGCCATACACTACACATCAGACATTGCTACTGCCTTCACCTCCGTAGC  
CCACATCTGTCGAGACGTCAACTACGGCTGACTTATCCGAAGCATTTCATGCCAACGG  
CGCATCATTCTTTTTTCATTTGCCTCTACCTTCATATTGGTCGAGGTCTATACTATGGC  
TCTTACCTCTATAAAGAAACATGAACTGTTGGGGTTATTCTCCTCCTTCTCGTAATAA  
TAACAGCCTTCGTTGGATACGTCCTCCCTTGAGGACAAATGTCATTTTGAGGTGCAA  
CCGTTATTACCAACCTTCTATCTGCCGTCCCCTACGTCGGAAACACCCTGGTCCAAT  
GGATCTGAGGTGGTTTTTCTGTAGACAATGCTACCCTCACCCGGTTCTTTGCCTTCCA  
CTTCTCTTCCCCTTCATCATCGCTGCCGCAACGTTAATTCATCTACTCTTTCTTCACG  
AAACTGGCTCAAACAACCCAACCGGGCTAAACTCAGACTCCGACAAAGTTCCTTTTC  
ACCCCTACTTCACTTACAAGGACCTCTTGGCTTTGCAGTCCTTCTTACTGCATTAGCA  
TCCCTAGCCCTATTTTCCCCAAATCTCTTAGGAGACCCAGATAACTTTACCCCTGCAA  
ATCCGCTTGTTACTCCCCACACATTAAGCCAGAGTGATACTTCCTGTTTGCCTATGC  
TATTCTCCGCTCCATTCCAAACAAACTTGGAGGAGTACTTGCCCTTTTATTCTCAATC  
TTAGTTCTTATGCTCGTCCCCTTCCTTCATACCTCTAAACAACGAAGCCTGATATTCC  
GTCCCCTAACACAATTTTTGTTCTGATCTTTAGTAGCAGACGTTATGATTCTAACTTG  
AATTGGAGGAATGCCCGTAGAACACCCCTTCGTTATCATTGGACAAGTAGCGTCTCT  
CCTTTACTTCTCCCTCTTCCTAGTCCTGATCCCAACAGCAGGTTGACTAGAGAATAA  
AGTCCTTGATGAAAATATGATTTCAACTCTCATTACGCATATTATCAACCCACTAA  
CCTTTATTGTACCTGTATTGCTAGCCGTAGCATTCCCTACCCTCCTTGAACGAAAAGT  
GCTAGGCTACATACAACTCCGAAAAGGGCCAAACATCGTAGGGCCTTACGGCCTCC  
TTCAACCTATTGCTGATGGTGTAACCTCTTTATTAAAGAACCCATTCGACCTTCGA  
CCGCATCACCCGTCTTATTCCTCCTGGCCCCCTATGCTCGCTCTCACACTAGCCCTAAC  
CCTTTGAGCCCCCATACTTTCCCGTACCCTGTCGTGGACCTTAACCTAGGTATTTTA  
TTTATTCTAGCCCTATCTAGCCTTGACAGTATATTCTATTCTGGGCTCCGGCTGAGCAT  
CTAATTCAAATATGCCCTAGTAGGGGGCACTGCGGGGCTGTCGCACAAACAATTTCTT  
ACGAAGTTAGCCTTGGACTCATCTTGCTAAACATTATCATCTTTACCGGAGGCTTCA  
CACTTCAAACCTTTAACACAGCCCAAGAGGCCATTTGACTAGTAGTGCCCGCTTGAC  
CACTGGCTGCCATATGATATATCTCCACTCTTGCCGAAACAAACCGTGCACCCTTCG  
ACTTAACAGAAGGAGAGTCTGAGCTTGTCTCGGGCTTCAACGTAGAGTACGCAGGC  
GGACCCTTCGCCTTATTCTTCTTGGCCGAATATTCAAATATTCTCCTAATAAATACCC  
TGTCCGCTACACTATTTTTAGGGGGCTCCCACATTCCATCTATCCCAGAATTAACCAG  
TATCAATATTATGACTAAAGCAGCCCTTCTGTCAATTGTCTTCCTATGAGTCCGAGCT  
TCGTACCCGCGGTTCCGTTACGACCAACTTATGCACCTCATTTGAAAAAACTTTCTTC  
CACTGACTTTGGCACTAGTTATCTGACACTTGGCGCTCCCTATTGCATTCGCTGGTCT  
CCCACCACAACCTATAGATGAACCCCTACATCTTGACCACTCTTCTATTTGGTTTGGGC  
CTAGGAACAACACTCACGTTTGCAAGCTCACACTGGCTCCTCGCTTGAATAGGACTT  
GAGATTAATACTAGCCATTATTCCCCTAATAGCCCAACATCACCACCCCCGGGCA  
GTCGAAGCTACCACTAAGTACTTTCTCGCACAAGCCACAGCAGCCGCCACCCTCCTG  
TTTGCGAGTACTACCAACGCTTGACTCACAGGCCAATGGGACATTCAACAGATAAC

ACATCCCCTCCCAACAACAATGATTGTTATTGCCCTCGCACTAAAAGTCGGACTGGC  
ACCAATGCACTCTTGACTTCCCGAAGTACTCCAAGGACTAGACCTAACCACCGGACT  
TATCCTCTCAACCTGACAAAACTTGACCCCTTTGCCCTCTTACTACAAATTCAAAC  
AACAAACCCTACGCCTCTAATCATTATTGGCTTACTATCCACGCTCGTTGGTGGCTGA  
GGTGGTCTCAACCAAACCCAGTTACGCAAAGTCCTCGCCTACTCCTCAATTGCCAC  
CTTGGCTGAATAATGCTGATCGTTCAATTTTACCCCCTCCTTGCCCTTCTCACCCCTC  
TCACGTACTTTCTATGACTTTCTCAGCATTCCCTAATTTTTAAAGTAAATAAAGCCACC  
ACTGTCAATGCCCTCGCAATCTCGTGAACAAAGACTCCTGCCCTCACAGCCCTAGCA  
CCCCTGGTTTTTACTATCCCTCGGCGGCCTTCCCCCCTTACCGGCTTCATGCCCAAGT  
GATTTATTCTTCAGGAAGTACTAAGCAAGACCTTCCACACTTGCCACCCTCGCCGC  
TTAACTGCCCTCTTGAGTCTCTACTTCTACCTCCGTCTCTCGTATGCAATAACCCTC  
ACAATATTCCCCAACAACTCATTGGCGTCACTCCCTGACGATTCTACTCCCCCAA  
TTTACGCTTCCCCTCGCCGTCTCCACTGCAGCAACCACCCTTCTTCTCCCACTAGCCC  
CCGCTGCCGTAGCACTACTGGTCACCTATGAGCCTTCTTCTAACCATCATTTCGATTG  
CCACCCTCCTCTCGACAGTACTTGCCCTTGTGTCTTTTGATTACCCCAAATTACACC  
AGACCACGAAAACTATCACCTTACGAGTGCGGCTTTGACCCGATAGGATCCGCCC  
GACTGCCTTTTTTACTGCGGTTTTTCTCATCGCCATCCTCTTTCTTCTATTTCGATTTA  
GAAATTGCTCTCCTCCTCCCTCTTCCATGAGGAGACCAACTAGCATCACCCTACTG  
ACATTCACCTGAGCTACAGCTGTCCTAGCCCTTCTAACCCTTGGCCTCATTTCAGAA  
GAATGCAAGGGGGTCTAGAATGGGCGGAATATGCTAAAAGTCCTAATCCCAACACT  
TATGCTAATCCCAACAGCCTGGTTACTCAAACCCAACTGACTCTGACCCATGACTTT  
AATGTATAGCTTTTGCATCTCCTTGGTCAGCCTTTCGTGACTAAAAAACCTCTCAGA  
AACC GGCTGATCGTCACTTAGCCTCTTTATAGCTACCGACTCCCTATCGACCCCCCTC  
CTCGTTCTTACATGCTGATTACTCCCACTAATAATTTTGGCAAGCCAGAAACACACA  
GCCTTAGAACCTCTTAGTCGCCAGCGCATGTACATCACACTTCTCGCCTCCTCCAGTT  
CTTCCTAATCCTAGCATTTAGCGCCACCGAACTGGTAATGTTTTACGTAATATTTGAA  
GCCACCCTTATCCCCACGCTAATCATTATCACCCGCTGAGGAAACCAACAGAACGT  
CTAAACGCAGGAACCTACTTTCTTCTTATACATTAGCGGGGCTCACTCCCCCTTCTCG  
TTGCTTTACTCCTACTCCAAAACACATCCGGCACCTATCGTTGTAAACCGTTCATA  
CACGGACCCGCTCGCTCTCGTCTTATGCAGACAACTATGATGAGCAGGCTGTCTTT  
TAGCATTCTGGTTAAAATACCCCTCTACGGAGTCCACCTATGGCTCCCTAAAGCCC  
ATGTTGAAGCTCCAATTGCAGGCTCAATAATCCTTGCAGCAGTTCTACTGAAGCTAG  
GGGGATACGGCATGATCCGCATGATAACGATATTGGAACCTCTAACTAAGGAATTA  
AGCTACCCCTTCATTGTCTTTGCACTTTGAGGGGTAAATTATACTGGCTCAATTTGTC  
TACGCCAGACAGACCTTAAGTCCTTAATTGCCTACTCATCAGTCAGCCACATGGGCC  
TAGTGGCTGGGGGAATTCTTATTCAATCACCTGAGGCTTAACAGGAGCCCTCACCC  
TCATAATTGCACACGGTCTTACTTCATCAGCCCTCTTCTGCTTGGCAAACACAACT  
ATGAACGAACCCACAGTCGAACAATGGTCCTGGCGCGAGGGCTTCAAGTAGCCCTA  
CCACTAATAGCCACTTGATGGTTTATTTCTAGCTTGGCCAACCTAGCTCTGCCACCAC  
TACCCAACCTCATGGGGGAGCTGATAATTACTTCTTTATTCAACTGGTCCTGGT  
GAACTCTGGCATTAAACCGGTGCAGGCACTCTAATCACAGCTGGTTACTCCCTTTACA  
TATTCTTAATAACTCAACGGGGGCCCTCTCCCAACACATGTCATTGCACTTGAGCCAT  
CTCACACCCGAGAACACCTTCTTATTGCCTTCACCTTATCCCCTTAATTCTGCTCGTA  
CTTAAGCCCGAGCTGATCTGAGGCTGAACTGCCTATGACCCCCACACACTTTGCCTT  
CTCCTCAGCCTTTCTTCTGGGTTTAACAGGCCTGGCATTCCACCGGTTTCACCTCCTT  
TCCGCTCTATTGTGCCTTGAAGGAATAATACTATCCCTATTTATTGCTCTTTCCCTAT  
GAACGCTCCAACCTGATTCAACCAGCTTTTTCAGCATCTCCAATACTTCTGCTTGCATT  
TTCAGCCTGCGAAGCAAGCGCCGGTCTCGCCCTATTAGTAGCCACTGCTCGAACCCA  
CGGGACCGACCGATTACAAAGCCTAAATCTTCTCCAATGCTAAATGTACCCACCTC  
CCTAATGATTTTCATCGAGCCTGATCACAATCTTTGCATTACTAGCCTATCCTTTAATC  
ACCACGATCCGTCCTACACCTCGAGGCCCTCAATGAGCTACCACCCATGTCAAAACA  
GCTGTAAAAATAGCTTTCTTTGTTAGTCTGCTACCTCTGACCCTATTTCTTAATGAGG

GCGCAGAAACAATCGTTACTAATTGAACCTGAATAAATACTAACTCCTTCAATATCA  
ACATTAGCTTGAAATTTGATTTCTACTCAATTATTTTTACACCCATTGCCCTCTACGT  
AACTTGGTCCATCCTAGAGTTCGCATCATGATACATGCACGCAGACCCACACATGAA  
CCGCTTCTTTAAATACCTCCTGACGTTTCTGATTGCCATAATCGTCCTAGTAACTGCA  
AACAAATATGTTTCAACTATTTATCGGCTGGGAGGGAGTGGGGATCATATCGTTCTTA  
CTTATTGGATGGTGGTTTCGGACGGGCGGATGCTAACACTGCAGCGCTTCAAGCAGTA  
ATTTACAACCGAGTAGGAGACATCGGACTTATCTTCGCCATGGCTTGAATAGCAGCA  
AACCTAAACTCCTGAGAGATACAACAAATCTTTGCAACCACCAAGGACATAGACTT  
AACCTACCCTCTTCTCGGACTCATCATTGCAGCAACTGGCAAATCGGCTCAATTCGG  
ACTTCACCCTTGACTACCCTCCGCTATGGAGGGTCCCACACCCGGTCTCTGCCCTACTT  
CATTCTAGCACTATGGTCGTTGCCGGCATTTCCTGCTAGTACGAATAAGCCCCCTCC  
TGGAAAACAACCAAACCGCCCTCACAACCTGCCTATGCCTCGGAGCTCTTACAACAC  
TATTCATGCAACCTGTGCCCTCAGCAAAAATGATATTAATAAAAAATCGTCGCATTCT  
CTACATCCAGCCAGCTTGGGCTTATAATGGTAACCATTGGTCTAAACCAACCACAAC  
TAGCATTCTTTCACATCTGTACACATGCCTTCTTCAAGGCCATACTGTTTTTATGCTC  
CGGATCTATTATCCACAGCCTAAATGACGAACAAGATATCCGCAAAAATAGGGGGCA  
TACACCACCTTGCACCTTTCACATCCTCTTGCCTAACTATTGGCAGCCTCGCCCTCAC  
AGGAACCCCCCTTCTTGGCTGGCTTCTTCTCTAAAGATGCCATCATCGAAGCATTGAA  
CACATCCACCTAAACGCCTGAGCCCTAACCTTAACCCTCCTAGCCACCTCTTTCAC  
AGCAATCTACAGCTTTCGAGTAGTATTTTTTGTACCCATGGGGCCACCCCGATTAGT  
CCCTCTCTCCGATCAACGAAAACAACCCAGCAGTAATTAACCCACTTAAGCGACTAG  
CATGGGGAAGTATCGTTGCAGGCTTACTAATTACCTCTAATATTACACCCTTAAAAA  
CCCCTGTCATATCTATGCCGCCTCTCCTTAAACTAGCTGCTCTTGCAGTTACAATCAT  
CGGCCTTCTTGTTGCTATAGAGCTCGCCATATTAACCAACAAGCAATATGAGCCAAT  
ACCCGGCACGACATACATCACTTCTCTGCCTTATTAGGCTTCTTCCCCGGGGTCATAC  
ACCGCCTAACCCCTGTATTGCTCTTCTTCTAGGCCAAAACATTGCTAACCAAACAG  
TAGATCAGACATGATTAGAAAAAACAGGCCCCAAAGCCATTGAATCCGCTAACCGA  
CCTCTAGTGTCTCTACAAGTAATATTCAACGGGGGGGTGATCAAAACATATCTTCCC  
TCTTCTCCTAACACTAGCCCTTATAATCCCCATATTCATCACCTAATGACTTTCGCT  
ATATATTTAGTTTTATTTTCTCTTGTGTTGGGGTTAGTTGCAGTTGCTTCTAATCCGTC  
CCCTTATTTTGCTGCTTTGGGTTTGGTTGTGGTAGCTGGCATGGGGTGTGGTATATTA  
GTTGGGCATGGAGGGCCCTTTTTGTCACTAGTCCTGTTCTTAATTTACTTAGGCGGGA  
TGTTAGTTGTATTTGCATATTCAGCAGCGTTAGCTGCTGAGCCGTACCCAGAGAGCT  
GGGGTAGTTGGTTCGGTAATGGTCTACGGTTGTCTATACAGGAGGAGTATTATAGTTT  
CTGGATTGTTTTGAGGGGGGTGGTATGAATCTTCTTGGGTCTTAGCAGATGAGTTGG  
GGGAGTTTTCCGTATTTTCGAGGGGATATCGGAGGGGTAGCCTTAATATACTCTTCTG  
GGGGGTGGTTGTTAATCACTAGTGCATGGGTATTGCTCTTAACTTTGTTTGTAGTCCT  
TGAGTTAACCGGGGTATGAGCCGAGGGGCGTTGCGACGGTTT

*Hippoglossus stenolepis*\_AM749128

ATGATACTAAGCTTCTTTGACCAATTTATATCCCCTTCATACCTCGGCATCCCCTAA  
TTGCACTAGCGATTAGCCTGCCTTGAATTCTGTTCCCAACCCCGCAAGCCGCTGATT  
AAACAACCGCGTACTAACACTTCAAGGGTGATTTATTAGCCGCTTCACCTCGCAACT  
TCTTCTACCCCTAAACCCCGGAGGCCACAAGTGGGCAGTTCTATTACCTCGTTAAT  
GTTTTCTTTTCTATCAACATGCTAGGACTCCTTCCATACACCTTCACACCAACGACC  
CAACTCTCCCTTAATATAGGCCTCGCAGTACCCCTTTGATTAGCAACTGTCATTATGG  
GATACGAAATCAACCAACGCATGCCCTAGGCCACCTTCTTCCAGAAGGCACCCCCA  
CTGCCCTCATCCCTGTACTTATTATCATTGAAACAATTAGCCTATTCATTGACCCCT  
CGCTCTCGGTGTCCGACTAACAGCAAATCTCACAGCAGGCCACCTCCTCATTCAACT  
CATTGCAACAGCTGCCTTCGTCCTTCTTCCCCTCATACCTGTTGTTGCTATCTTAACA  
ACGGTGGTCTCTTCTCCTCCTCACCTACTAGAAGTAGCCGTTGCCATGATTCAAGCTT  
ATGCTTTTGTCTACTCCTAAGCCTATATCTACAAGAGAACGTTTAAATGCCTCAACTG  
AACCCCGCACCCCTGATTTGCAATTTTAGTTTTCTCTTGAATAATCTTTTTAACTGTTA

TTCCCCCAAAGTTTTAGCACACACCTATCCTAATGAACCCACCTCCCAAAGCACAC  
AAAAACAAAACAGAGCCCTGAAACTGACCATGATACTAAGTGGCAATCACACGTTG  
ATTTTTCTCGACCAATCACAAAGACATCGGCACCCTCTATCTCGTATTTGGTGCCTGA  
GCCGGAATAGTGGGGACAGGCCTAAGTCTGCTTATTCGGGCAGAACTAAGCCAACC  
CGGGGCTCTCCTGGGAGACGACCAAATTTATAATGTAATCGTCACCGCACACGCCTT  
TGTAATAATCTTTTTTATAGTAATACCCATTATGATTGGGGGGTTCGGAACTGGCTT  
ATTCCACTAATAATTGGGGCCCCAGATATGGCGTTCCCTCGAATGAATAATATGAGT  
TTCTGACTTCTTCCCCCCTCCTTTCTCCTCCTCTTAGCCTCTTCAGGTGTTGAAGCCGG  
AGCAGGTACCGGATGAACCGTATACCCCCCACTAGCTGGCAATTTAGCCACGCGG  
GAGCATCCGTAGACCTGACAATCTTCTCACTTCACCTTGCAGGAATTTTCATCAATTCT  
GGGGGCAATTAACTTTATTACTACTATCATTAACATGAAACCCACAACAGTCACTAT  
GTACCAAATCCCCTTATTTGTTTGAGCCGTTCTTATTACAGCCGTACTTCTTCTTCTAT  
CCCTGCCCCGTTTTAGCCGCAGGAATTACAATACTACTAACAGACCGCAACCTTAACA  
CGACCTTCTTTGACCCTGCCGGAGGAGGTGACCCCATCCTCTACCAACACCTATTCT  
GATTCTTTGGTCACCCAGAGGTATACATTCTTATTCTCCCGGGCTTCGGAATAATTTCT  
TCACATTGTTGCATACTATGCAGGTAAGAAAGAACCTTTTGGCTACATGGGGATAGT  
CTGAGCTATAATGGCCATTGGACTCCTGGGGTTCATTGTCTGGGCCCATCACATATT  
TACAGTCGGAATAGATGTAGACACACGAGCCTACTTTACCTCTGCCACAATAATCAT  
TGCGATTCCAACCTGGCGTAAAAGTCTTTAGCTGACTCGCAACCCTCCATGGAGGAAG  
CATTAAATGAGAAACACCCCTTCTATGAGCCCTCGGCTTTATTTTCTTCTTACAGTA  
GGCGGTCTCACTGGCATTGTCTTAGCTAACTCCTCTCTCGATATTGTTCTGCATGACA  
CATACTATGTAGTCGCTCACTTCCACTATGTACTATCTATGGGTGCTGTATTTGCAAT  
CGTTGCCGCCTTCGTCCACTGGTTTCCATTATTTACAGGCTATACCCTTCACTCCACA  
TGAACAAAAATCCACTTCGGCCTGATATTTATTGGGGTCAATCTAACATTCTTCCCC  
CAACATTTTCTGGGCCTGGCCGGAATACCCCGACGGTACTCAGACTACCCAGATGCA  
TACACCCTTTGAAACACTGTTTCATCAATCGGGTCCCTAATGTCCCTCGTTGCTGTAA  
TTTTATTTTATTTCATTATTTGAGAAGCATTACAGCCAAACGAGAAGTCGGAGCAG  
TAGAACTAACTGCAACTAACATTGAATGACTTTACGGCTGCCCTCCGCCCTACCACA  
CATTGGAAGAGCCCGCATTTCGTACAAGTTCGTATAAACTAAATGGCACATCCCTCAC  
AACTCGGATTTCAAGACGCAGCTTCACCCTTAATAGAAGAACTACTTCACTTCCACG  
ACCACGCCTTAATAATTGTAATTCTCATTAGCACAAATAGTACTTTATATTATTGCGGC  
TATAGTCACAGCCAACTAACAGATAAACTTGTACTAGACTCTCAAGAAATTGAAA  
TTATCTGAACAGTTCTCCAGCTGTTATTCTTATCCTTATCGCCCTACCATCCATCCG  
AATTTTGTACTTAATAGACGAAATTAATGACCCCCACCTGACAATTAAGCCATTGG  
CCACCAGTGATACTGAAGCTACGAATACACAGACTACGAAGACCTCGGTTTTTGACTC  
ATACATAATCCCCACACAAGACCTGACCCCTGGACAATTCCGACTACTAGAAGCAG  
ACCACCGAATAGTAATCCCGGTAGAATCCCCAATTCGCGTTTTAATCTCGGCTGAAG  
ATGTCTTACATTCTGCGGAGTCCCCTCTCTAGGCGTAAAAGTTGACGCCGTACCTG  
GACGATTGAACCAAGCAACCTTTATTGTTAGCCGACCAGGCGTATTTTTCGGACAAT  
GTTCTGAGATTTGCGGGGCTAACCATAGTTTTATACCATTGTTGTAGAAGCAGTCC  
CCCTTGAACACTTTGAGAAGTGGTCTTCACTAATAATTGAAGACGCCTATGGCCCAT  
CAAGCACACCCCTACCACATAGTCGACCCCAAGCCCATGACCCCTAACAGGGGGCTATT  
GCTGCCCTATTGATAACATCTGGCCTTGCTATCTGATTCCACTTCCACTCCACAACCC  
TGATAACTATTGGGACAATCCTTCTCACCTTAACAATCTTCCAATGATGACGGGACG  
TCGTACGGGAAGGCACATTTCAAGGACACCACACTCCCCCGTTCAAAAAGGCCTC  
CGATATGGTATAATTTTATTATTACCTCAGAAGTCCTATTCTTCTTAGGCTTCTTCT  
GAGCCTTTTACCATTCAAGCCTAGCACCTACCCCTGAGCTAGGCGGCTTCTGACCAC  
CGGCAGGCATTACTCCCTTAGACCCCTTTGAAGTCCCCTTCTTAACACAGCAGTCC  
TGCTTGCCCTCTGGCGTAACCTGTTACCTGAGCACACCACAGCATTATAGAGGGTAAAC  
GAAAACAACTATTCAATCTCTTGCTCTTACAATCTTACTCGGGGGGTACTTCACTTT  
CCTTCAAGGCCTAGAGTATCACGAAGCCCCCTTACCATTGCAGACGGAGTTTACGG  
CGCTACATTCTTTGTTGCCACCGGCTTCCACGGACTACACGTCTTAATTGGCACGTCA

TTCTTAGCCGTTTGTCTATTACGCCAAATTCTTCACCATTTCACATCAAACCACCACT  
TTGGGTTTGAAGCAGCCGCATGATACTGACACTTCGTAGACGTCGTCTGACTTTTCC  
TCTATATCTCTATTTACTGATGAGGATCTTAATGGCCAGTCTACGTAAATCCCACCCT  
CTTCTAAAAATCGCAAACGATGCTTTAGTCGACCTCCCAGCCCCCTCTAATATCTCT  
GTTTGATGAACTTTGGGTCTCTTTTAGGACTCTGTTTAATTACCCAAATTGCAACCG  
GCTTATTTCTAGCCATACACTACACATCAGACATTGCTACTGCCTTCACCTCCGTAGC  
CCACATCTGTCGAGACGTCAACTACGGCTGGCTTATCCGAAGCATTTCATGCCAACGG  
CGCATCATTCTTTTTTCATTTGCCTCTACCTTCATATTGGTTCGAGGTCTATACTATGGC  
TCTTACCTCTATAAAGAAACATGAACTGTTGGGGTTATTCTCCTCCTTCTCGTAATAA  
TAACAGCCTTCGTTGGATACGTCTCCTCCCTTGAGGACAAATGTCGTTTTGAGGTGCAA  
CCGTTATTACCAACCTTCTATCTGCCGTCCCCTACGTTCGGAAACACCCTGGTCCAAT  
GGATCTGAGGTGGTTTTTCTGTAGACAATGCTACCCTCACCCGGTTCTTTGCCTTCCA  
CTTCTCTTCCCCTTCATCATCGCTGCCGCAACGTTAATTCATCTACTCTTTCTTCACG  
AAACTGGCTCAAACAACCCAACCGGGCTAAACTCAGACTCCGACAAAGTTCCTTTTC  
ACCCCTACTTCACTTACAAGGACCTCTTGCTTTGCAGTCCTTCTTACTGCATTAGCA  
TCCCTAGCCCTATTTTCCCCAAATCTCTTAGGAGACCCAGATAACTTTACCCCTGCAA  
ATCCGCTTGTTACTCCTCCACACATTAAGCCAGAGTGATACTTCCTGTTTGCCTATGC  
TATTCTCCGCTCCATTCCAAACAAACTTGGAGGAGTACTTGCCCTTTTATTCTCAATC  
TTAGTTCTTATGCTCGTCCCCTTCCTTCATACCTCTAAACAACGAAGCCTGATATTCC  
GTCCCCTAACACAATTTTTGTTCTGATCTTTAGTAGCAGACGTTATGATTCTAACTTG  
AATTGGAGGAATGCCCCGTAGAACACCCCTTCGTTATCATTGGACAAGTAGCGTCTCT  
CCTTTACTTCTCCCTCTTCCTAGTCCTGATCCCAACAGCAGGTTGACTAGAGAATAA  
AGTCCTTGGATGAAAATATGATTTCAACTCTCATTACGCATATTATCAACCCACTAA  
CCTTTATTGTACCTGTATTGCTAGCCGTAGCATTCCCTACCCTCCTTGAACGAAAAGT  
GCTAGGCTACATACAACTCCGAAAAGGGCCAAACATCGTAGGGCCTTACGGCCTCC  
TTCAACCTATTGCTGATGGTGTAAACTCTTTATTAAAGAACCCATTCGACCTTCGA  
CCGCATCACCCGTCTATTCCTCCTGGCCCCCTATGCTCGCTCTCACACTAGCCCTAAC  
CCTTTGAGCCCCCATACCTTTCCCGTACCCTGTCGTGGACCTTAACCTAGGTATTTTA  
TTTATTCTAGCCCTATCTAGCCTTGCGAGTATATTCTATTCTGGGCTCCGGCTGAGCAT  
CTAATTCAAATATGCCCTAGTAGGGGCACTGCGGGCTGTCGCACAAACAATTTCTT  
ACGAAGTTAGCCTTGGACTCATCTTGCTAAACATTATCATCTTTACCGGAGGCTTCA  
CACTTCAAACCTTTAACACAGCCCAAGAGGCCATTTGACTAGTAGTGCCCGCTTGAC  
CACTGGCTGCCATATGATATATCTCCACTCTTGCCGAAACAAACCGTGACCCCTTCG  
ACTTAACAGAAGGAGAGTCTGAACTTGTCTCGGGCTTCAACGTAGAGTACGCAGGC  
GGACCCTTCGCCTTGTTCTTCTTGCCGAATATTCAAATATTCTCCTAATAAATACCC  
TGTCCGCTACACTATTTTTAGGGGCCTCCCACATTCCATCTATCCCAGAATTAACCAG  
TATCAATATTATGACTAAAGCAGCCCTTCTGTCAATTGTCTTCCTATGAGTCCGAGCT  
TCGTACCCGCGATTCCGTTACGACCAACTTATGCACCTCATTGAAAAAACTTTCTTC  
CACTGACTTTGGCACTAGTTATCTGACACTTGCGCTCCCTATTGCATTGCTGGTCT  
CCCACCACAACCTATAGATGAACCCCTACATCTTGACCACTCTTCTATTTGGTTTGGGC  
CTAGGAACAACACTCACGTTTGCAAGCTCACACTGGCTCCTCGCTTGAATAGGACTT  
GAGATTAATACTAGCCATTATTCCCCTAATAGCCCAACATCACCAACCCCGGGCA  
GTCGAAGCTACCACTAAGTACTTTCTCGCACAAGCCACAGCAGCCGCCACCCTCCTG  
TTTGCGAGTACTACCAACGCTTGACTCACAGGCCAATGGGACATTCAACAGATAAC  
ACATCCCCTCCCAACAACAATGATTGTTATTGCCCTCGCACTAAAAGTCGGACTGGC  
ACCAATGCACCTTTGACTTCCCGAAGTACTCCAAGGACTAGACCTAACCACCGGACT  
TATCCTCTCAACCTGACAAAAACTTGACCCCTTTGCCCTCTTACTACAAATTCAAAC  
AACAAACCTACGCCTCTAATCATTATTGGCTTACTATCCACGCTCGTTGGTGGCTGA  
GGTGGTCTCAACCAAACCCAGTTACGCAAAGTCCTCGCCTACTCCTCAATTGCCAC  
CTTGGCTGAATAATGCTGATCGTTCAATTTTACCCCTCCTTGCCCTTCTCACCCCTCC  
TCACGTACTTTCTATGACTTTCTCAGCATTCTTAATTTTTAAAGTAAATAAAGCCACC  
ACTGTCAATGCCCTCGCAATCTCGTGAACAAAGACTCCTGCCCTCACAGCCCTAGCA

CCCCTGGTTTTACTATCCCTCGGCGGCCTTCCCCCCTTACCGGCTTCATACCCAAGT  
GATTTATTCTTCAGGAAGTACTAAGCAAGACCTTCCACACTTGCCACCCTCGCCGC  
TTTAACTGCCCTCTTGAGTCTCTACTTCTACCTCCGTCTCTCGTATGCAATAACCCTC  
ACAATATTCCCCAACAACCTCATTGGCGTCACTCCCTGACGATTCTACTCCCCCAA  
TTACGCTTCCCCTCGCCGTCTCCACTGCAGCAACCACCCTTCTTCTCCCACTAGCCC  
CCGCTGCCGTAGCACTACTGGTCACCTATGAGCCTTCTTCTAACCATCATTTCGATTG  
CCACCCTCCTCTCGACAGTACTTGCCCTTGTGTCCTTTTGATTACCCCAAATTACACC  
AGACCACGAAAACTATCACCTTACGAGTGC GGCTTTGACCCGATAGGATCCGCCC  
GACTGCCTTTTTTCACTGCGGTTTTTTCCTCATCGCCATCCTCTTTCTTCTATTTCGATTTA  
GAAATTGCTCTCCTCCTCCCTCTTCCATGAGGAGACCAACTAGCATCACCCTACTG  
ACATTCACCTGAGCTACAGCTGTCCTAGCCCTTCTAACCCTTGGCCTCATTTCGAAT  
GAATGCAAGGGGGTCTAGAATGGGCGGAATATGCTAAAAGTCCTAATCCCAACACT  
TATGCTAATCCCAACAGCCTGGTTACTCAAACCCAACTGACTCTGACCCATGACTTT  
AATGTATAGCTTTTGCATCTCCTTGGTCAGCCTTTCGTGACTAAAAAACCTCTCAGA  
AACCGGCTGATCGTCACTTAGCCTCTTTATAGCTACCGACTCCCTATCGACCCCCCTC  
CTCGTTCTTACATGCTGATTACTCCCACTAATAATTTTGGCAAGCCAGAAACACACA  
GCCTTAGAACCTCTTAGTCGCCAGCGCATGTACATCACACTTCTCGCCTCCTCCAGTT  
CTTCCTAATCCTAGCATTTAGCGCCACCGAACTGGTAATGTTTTACGTAATATTTGAA  
GCCACCCTTATCCCCACGCTAATCATTATCACCCGCTGAGGAAACCAAACAGAACGT  
CTAAACGCAGGAACCTACTTTCTTCTATACATTAGCGGGCTCACTCCCCCTTCTCG  
TTGCTTTACTCCTACTCCAAAACACATCCGGCACCCCTATCGTTGTAAACCCTTCACTA  
CACGGACCCGCTCGCTCTCGTCTTATGCAGACAAACTATGATGAGCAGGCTGTCTTT  
TAGCATTCTGGTTAAAATACCCCTCTACGGAGTCCACCTATGGCTCCCTAAAGCCC  
ATGTTGAAGCTCCAATTGCAGGCTCAATAATCCTTGCAGCAGTTCTACTGAAGCTAG  
GGGGATACGGCATGATCCGCATGATAACGATATTGGAACCTCTAACTAAGGAATTA  
AGCTACCCCTTCATTGTCTTTGCACTTTGAGGGGTAAATTATAACTGGCTCAATTTGTC  
TACGCCAGACAGACCTTAAGTCCTTAATTGCCTACTCATCAGTCAGCCACATGGGCC  
TAGTGGCTGGGGGAATTCTTATTCAATCACCCCTGAGGCTTAACAGGAGCCCTCACCC  
TCATAATTGCACACGGTCTTACTTCATCAGCCCTCTTCTGCTTGGCAAACACAAACT  
ATGAACGAACCCACAGTCGAACAATGGTCCTGGCGCGAGGACTTCAAGTAGCCCTA  
CCACTAATAGCCACTTGATGGTTTATTTCTAGCTTGGCCAACCTAGCTCTGCCACCAC  
TACCCAACCTCATGGGGGAGCTGATAATTATCACTTCTTTATTCAACTGGTCCTGGT  
GAACTCTGGCATTAAACCGGTGCAGGCACTCTAATCACAGCTGGTTACTCCCTTTACA  
TATTCTTAATAACTCAACGGGGCCCTCTCCCAACACATGTCATTGCACTTGAGCCAT  
CTCACACCCGAGAACACCTTCTTATTGCCTTCACCTTATCCCCTTAATTCTGCTCGTA  
CTTAAGCCCGAGCTGATCTGAGGCTGAACTGCCTATGACCCCCACACACTTTGCCTT  
CTCCTCAGCCTTTCTTCTGGGTTTAAACAGGCCTGGCATTCCACCGGTTTCACCTCCTT  
TCCGCTCTATTGTGCCTTGAAGGAATAATACTATCCCTATTTATTGCTCTTTCCCTAT  
GAACGCTCCAACCTTGATTCAACCAGCTTTTCAGCATCTCCAATACTTCTGCTTGCATT  
TTCAGCCTGCGAAGCAAGCGCCGGTCTCGCCCTATTAGTAGCCACTGCTCGAACCCA  
CGGGACCGACCGATTACAAAGCCTAAATCTTCTCCAATGCTAAATGTACCCACCTC  
CCTAATGATTTTCATCGAGCCTGATCACAATCTTTGCATTACTAGCCTATCCTTTAATC  
ACCACGATCCGTCTACACCTCGAGGCCCTCAATGAGCTACCACCCATGTCAAAACA  
GCTGTAAAAATAGCTTTCTTTGTTAGTCTGCTACCCCTGACCCTATTTCTTAATGAGG  
GCGCAGAAACAATCGTTACTAATTGAACCTGAATAAATACTAACTCCTTCAATATCA  
ACATTAGCTTGAAATTTGATTTCTACTCAATTATTTTTACACCCATTGCCCTCTACGT  
AACTTGGTCCATCCTGGAGTTCGCATCATGATACATGCACGCAGACCCACACATGAA  
CCGCTTCTTTAAATACCTCCTGACGTTTCTGATTGCCATAATCGTCCTAGTAACTGCA  
AACAAATATGTTTCAACTATTTATCGGCTGGGAGGGAGTGGGGATCATATCGTTCTTA  
CTTATTGGATGGTGGTTTCGGACGGGCGGATGCTAACACTGCAGCGCTTCAAGCAGTA  
ATTTACAACCGAGTAGGAGACATCGGACTTATCTTCGCCATGGCTTGAATAGCAGCA  
AACCTAAACTCCTGGGAGATACAACAAATCTTTGCAACCACCAAGGACATAGACTT

AACCTACCCTCTTCTCGGACTCATCATTGCAGCAACTGGCAAATCGGCTCAATTCTGG  
ACTTCACCCTTGACTACCCTCCGCTATGGAGGGTCCCACACCGGTCTCTGCCCTACTT  
CATTCTAGCACTATGGTCGTTGCCGGCATTTCCTGCTAGTACGAATAAGCCCCCTCC  
TGGAACAACCAACCGCCCTCACAACCTGCCTATGCCTCGGAGCTCTTACAACAC  
TATTCACTGCAACCTGTGCCCTCACGCAAAATGATATTAATAAATCGTCGCATTCT  
CTACATCCAGCCAGCTTGGGCTTATAATGGTAACCATTGGTCTAAACCAACCACAAC  
TAGCATTTCTTCACATCTGTACACATGCCTTCTTCAAGGCCATACTGTTTTATGCTC  
CGGATCTATTATCCACAGCCTAAATGATGAACAAGATATCCGCAAAATAGGGGGCA  
TACACCACCTTGACCTTTCACATCCTCTTGCCCTAACTATTGGCAGCCTCGCCCTCAC  
AGGAACCCCTTCTTGGCTGGCTTCTTCTCTAAAGATGCCATCATCGAAGCATTGAA  
CACATCCACCTAAACGCCTGAGCCCTAACCTTAACCCTCCTAGCCACCTCTTTCAC  
AGCAATCTACAGCTTTCGAGTAGTATTTTTGTACCCATGGGCCACCCCGATTAGT  
CCCTCTCTCCGATCAACGAAAACAACCCAGCAGTAATTAACCCACTTAAGCGACTAG  
CATGGGGAAGTATCGTTGCAGGCTTACTAATTACCTCTAATATTACACCCTTAAAAA  
CCCCTGTCATATCTATGCCTCCTCTCCTTAACTAGCTGCTCTTGACGTTACAATCAT  
CGGCCTTCTTGTGCTATAGAGCTCGCCATATTAACCAACAAGCAATATGAGCCAAT  
ACCCGGCACGACATACACCCTTCTCTGCCTTATTAGGCTTCTTCCCCGGGGTCATA  
CACCGCCTAACCCCTGTATTGCTCTTCTCCTAGGCCAAAACATTGCTAACCAACA  
GTAGATCAGACATGATTAGAAAAACAGGCCCAAAGCCATTGAATCCGCTAACCG  
ACCTCTAGTGTCTCTACAAGTAATATCAACGGGGGGTGATCAAAACATATCTTCC  
CTCTTCCCTAACACTAGCCCTTATAATCCCCATATTCATCACCTAATGACTTTCGC  
TATATATTTAGTTTTATTTCTCTTGTGTTGGGGTTAGTTGCAGTTGCTTCTAATCCGT  
CCCCTTATTTTGCTGCTTTGGGTTTGGTTGTGGTAGCTGGCATGGGGTGTGGTATATT  
AGTTGGGCATGGAGGGGCCCTTTTTGTCAGTCTGTTCTTAATTTACTTAGGCGGG  
ATGTTAGTTGTATTTGCATATTCAGCAGCGTTAGCTGCTGAGCCGTACCCAGAGAGC  
TGGGGTAGTTGGTCGGTAATGGTCTACGGTTGTCTATACAGGAGGAGTATTATAGTT  
TCTGGGTTGTTTTGAGGGGGGTGGTATGAATCTTCTTGGGTCTTAGCAGATGAGTTG  
GGGGAGTTTTCCGTGTTTCGAGGGGATATCGGAGGGGTAGCCTTAATATACTCTTCT  
GGGGGGTGGTTGTTAATCACTAGTGCATGGGTATTGCTCTTAACCTTGTGTTGTAGTCC  
TTGAGTTAACCGGGGTATGAGCCGAGGGGCGTTGCGACGGTTT

*Hippoglossus\_stenolepis*\_AM749129

ATGATACTAAGCTTCTTTGACCAATTTATATCCCCTTCATACCTCGGCATCCCCTAA  
TTGCACTAGCGATTAGCCTGCCTTGAATTCTGTTCCCAACCCCGCAAGCCGCTGATT  
AAACAACCGCGTACTAACACTTCAAGGGTGATTTATTAGCCGCTTCACCTCGCAACT  
TCTTCTACCCCTAAACCCCGGAGGCCACAAGTGGGCAGTTCTATTACCTCGTTAAT  
GTTTTCTTTCTATCAACATGCTAGGACTCCTTCCATACACCTTCACACCAACGACC  
CAACTCTCCCTTAATATAGGCCTCGCAGTACCCCTTTGATTAGCAACTGTCATTATGG  
GATACGAAATCAACCAACGCATGCCCTAGGCCACCTTCTTCCAGAAGGCACCCCCA  
CTGCCCTCATCCCTGTACTTATTATCATTGAAACAATTAGCCTATTCATTGACCCCT  
CGCCCTCGGTGTCCGACTAACAGCAAATCTCACAGCAGGCCATCTCCTTATTCAACT  
CATTGCAACAGCTGCCTTCGTCCTTCTTCCCCTCATACCTGTTGTTGCTATCTTAACA  
ACGGTGGTCCTCTTCCCTCCTCACCTACTAGAAGTAGCCGTTGCCATGATTCAAGCTT  
ATGCTTTTGTCTACTCCTAAGCCTATATCTACAAGAGAAGGTTAATGCCTCAACTG  
AACCCCGCACCTGATTTGCAATTTTAGTTTTTCTCTTGAATAATCTTTTTAACTGTTA  
TTCCCCCAAAGTTTTAGCACACACCTATCCTAATGAACCCACCTCCCAAAGCACAC  
AAAAACAAAACAGAGCCCTGAACTGACCATGATACTAAGTGGCAATCACACGTTG  
ATTTTTCTCGACCAATCACAAAGACATCGGCACCCTCTATCTCGTATTTGGTGCCTGA  
GCCGGAATAGTGGGGACAGGCCTAAGTCTGCTTATTCGGGCAGAACTAAGCCAACC  
CGGGGCTCTCCTGGGAGACGACCAAATTTATAATGTAATCGTCACCGCACACGCCTT  
TGTAATAATCTTTTTTATAGTAATACCCATTATGATTGGGGGGTTCGGAACTGGCTT  
ATTCCACTAATAATTGGGGCCCCAGATATGGCGTTCCCTCGAATGAATAATATGAGT  
TTCTGACTTCTTCCCCCTCCTTTCTCCTCCTCTTAGCCTCTTCAGGTGTTGAAGCCGG



AGCAGGTACCGGATGAACCGTATACCCCCCACTAGCTGGCAATTTAGCCCACGCCG  
GAGCATCCGTAGACCTGACAATCTTCTCACTTCACCTTGCAGGAATTTTCATCAATTCT  
GGGGGCAATTAACTTTATTACTACTATCATTAAACATGAAACCCACAACAGTCACTAT  
GTACCAAATCCCCTTATTTGTTTGAGCCGTTCTTATTACAGCCGTACTTCTTCTTCTAT  
CCCTGCCCCGTTTTAGCCGCAGGAATTACAATACTACTAACAGACCGCAACCTTAACA  
CGACCTTCTTTGACCCTGCCGGAGGAGGTGACCCCATCCTCTACCAGCACCTATTCT  
GATTCTTTGGTCAACCAGAGGTATACATTCTTATTCTCCCGGGCTTCGGAATAATTTT  
TCACATTGTTGCATACTATGCAGGTAAGAAAGAACCTTTTGGCTACATGGGGATAGT  
CTGAGCTATAATGGCCATTGGACTCCTGGGGTTCATTGTCTGGGCCCATCACATATT  
TACAGTCGGAATAGATGTAGACACACGAGCCTACTTTACCTCTGCCACAATAATCAT  
TGCGATTCCAACCTGGCGTAAAAGTCTTTAGCTGACTCGCAACCCTCCATGGAGGAAG  
CATTAAATGAGAAACACCCCTTCTATGAGCCCTCGGCTTTATTTTCTCTTTACAGTA  
GGCGGTCTCACTGGCATTGTCTTAGCTAACTCCTCTCTCGATATTGTTCTGCATGACA  
CATACTATGTAGTCGCTCACTTCCACTATGTACTATCTATGGGTGCTGTATTTGCAAT  
CGTTGCCGCCTTCGTCCACTGGTTTCCATTATTTACAGGCTATACCCTTCACTCCACA  
TGAACAAAAATCCACTTCGGCCTGATATTTATTGGAGTCAATCTAACATTCTTCCCC  
CAACATTTTCTGGGCCTGGCCGGAATACCCCGACGGTACTCAGACTACCCAGATGCA  
TACACCCTTTGAAACACTGTTTCATCAATCGGGTCCCTAATGTCCCTCGTTGCTGTAA  
TTTTATTTTATTTCATTATTTGAGAAGCATTACAGCCAAACGAGAAGTCGGAGCAG  
TAGAACTAACTGCAACTAACATTGAATGACTTTACGGCTGCCCTCCGCCCTACCACA  
CATTTGAAGAGCCCGCATTCGTACAAGTTCGTATAAACTAAATGGCACATCCCTCAC  
AACTCGGATTTCAAGACGCAGCTTCACCCTTAATAGAAGAACTACTTCACTTCCACG  
ACCACGCCTTAATAATTGTAATTCTCATTAGCACAAATAGTACTTTATATTATTGCGGC  
TATAGTCACAGCCAACTAACAGATAAACTTGTACTAGACTCTCAAGAAATTGAAA  
TTATCTGAACAGTTCTCCAGCTGTTATTCTTATCCTTATCGCCCTACCATCCATCCG  
AATTTTGTACTTAATAGACGAAATTAATGACCCCCACCTGACAATTAAGCCATTGG  
CCACCAGTGATACTGAAGCTACGAATACACAGACTACGAAGACCTCGGTTTTGACTC  
ATACATAATCCCCACACAAGACCTGACCCCTGGACAATTCCGACTACTAGAAGCAG  
ACCACCGAATAGTAATCCCGGTAGAATCCCCAATTCGCGTTTTAATCTCGGCTGAAG  
ATGTCTTACATTCTTGGGCAGTCCCCTCTCTAGGCGTAAAAGTTGACGCCGTACCTG  
GACGATTGAACCAAGCAACCTTTATTGTTAGCCGACCAGGCGTATTTTTCGGACAAT  
GTTCTGAGATTTGCGGGGCTAACCATAGTTTTATACCCATTGTTGTAGAAGCAGTCC  
CCCTTGAACACTTTGAGAACTGGTCTTCACTAATAATTGAAGACGCCTATGGCCCAT  
CAAGCACACCCATACCACATAGTCGACCCAGCCCATGACCCCTAACAGGGGCTAT  
TGCTGCCCTATTGATAACATCTGGCCTTGCTATCTGATTCCACTTCCACTCCACAACC  
CTGATAACTATTGGGACAATCCTTCTCACCTTAACAATCTTCCAATGATGACGGGAC  
GTCGTACGGGAAGGCACATTTCAAGGACACCACACTCCCCCGTTCAAAAAGGCCT  
CCGATATGGTATAATTTTATTATTACCTCAGAAGTCCTATTCTTCTTAGGCTTCTTCT  
GAGCCTTTTACCATTCAAGCCTAGCACCTACCCCTGAGCTAGGCGGCTTCTGACCAC  
CGGCAGGCATTACTCCCTTAGACCCCTTTGAAGTCCCACTTCTTAACACAGCAGTCC  
TGCTTGCCCTCTGGCGTAACCTGTTACCTGAGCACACCACAGCATTATAGAGGGTAAAC  
GAAAACAACTATTCAATCTCTTGCTCTTACAATCTTACTCGGGGGGTACTTCACTTT  
CCTTCAAGGCCTAGAGTATCACGAAGCCCCCTTACCATTGCAGACGGAGTTTACGG  
CGCTACATTCTTTGTTGCCACCGGCTTCCACGGACTACACGTCTTAATTGGCACATCA  
TTCTTAGCCGTTTTGTCTATTACGCCAAATTCTTACCATTTCACATCAAACCACCACT  
TTGGGTTTGAAGCAGCCGCATGATACTGACACTTCGTAGACGTCGTCTGACTTTTCC  
TCTATATTTCTATTTACTGATGAGGATCTTAATGGCCAGTCTACGTAAATCCCACCCT  
CTTCTAAAAATCGCAAACGATGCTTTAGTCGACCTCCCAGCCCCCTCTAATATCTCT  
GTTTGATGAACTTTGGGTCTCTTTTAGGACTCTGTTTAATTACCCAAATTGCAACCG  
GCTTATTTCTAGCCATACACTACACATCAGACATTGCTACTGCCTTCACCTCCGTAGC  
CCACATCTGTCGAGACGTCAACTACGGCTGGCTTATCCGAAGCATTTCATGCCAACGG  
CGCATCATTCTTTTTCATTTGCCTCTACCTTCATATTGGTCGAGGTCTATACTATGGC

TCTTACCTCTATAAAGAAACATGAACTGTTGGGGTTATTCTCCTCCTTCTCGTAATAA  
TAACAGCCTTCGTTGGATACGTCCTCCCTTGAGGACAAATGTCGTTTTGAGGTGCAA  
CCGTTATTACCAACCTTCTATCTGCCGTCCCCTACGTCGGAAACACCCTGGTCCAAT  
GGATCTGAGGTGGTTTTTCTGTAGACAATGCTACCCTACCCGGTTCTTTGCCTTCCA  
CTTCCTCTTCCCCTTCATCATCGCTGCCGCAACGTTAATTCATCTACTCTTTCTTCACG  
AAACTGGCTCAAACAACCCAACCGGGCTAAACTCAGACTCCGACAAAGTTCCTTTTC  
ACCCCTACTTCACTTACAAGGACCTCTTGGCTTTGCAGTCCTTCTTACTGCATTAGCA  
TCCCTAGCCCTATTTTCCCCAAATCTCTTAGGAGACCCAGATAACTTTACCCCTGCAA  
ATCCGCTTGTTACTCCCCACACATTAAGCCAGAGTGATACTTCCTGTTTGCCTATGC  
TATTCTCCGCTCCATTCCAAACAAACTTGGAGGAGTACTTGCCCTTTTATTCTCAATC  
TTAGTTCTTATGCTCGTCCCCTTCCTTCATACCTCTAAACAACGAAGCCTGATATTCC  
GTCCCCTAACACAATTTTTGTTCTGATCTTTAGTAGCAGACGTTATGATTCTAACTG  
AATTGGAGGAATGCCCGTAGAACACCCCTTCGTTATCATTGGACAAGTAGCGTCTCT  
CCTTTACTTCTCCCTCTTCCTAGTCCTGATCCCAACAGCAGGTTGACTAGAGAATAA  
AGTCCTTGGATGAAAATATGATTTCAACTCTCATTACGCATATTATCAACCCACTAA  
CCTTTATTGTACCTGTATTGCTAGCCGTAGCATTCCCTACCCTCCTTGAACGAAAAGT  
GCTAGGCTACATACAACTCCGAAAAGGGCCAAACATCGTAGGGCCTTACGGCCTCC  
TTCAACCTATTGCTGATGGTGTAAAACTCTTTATTAAGAACCCTTCGACCTTCGA  
CCGCATCACCCGTCTATTCTCCTGGCCCCTATGCTCGCTCTCACACTAGCCCTAAC  
CCTTTGAGCCCCCATACCTTTCCCGTACCCTGTCGTGGACCTTAACCTAGGTATTTTA  
TTATTCTAGCCCTATCTAGCCTTGCAGTATATTCTATTCTGGGGCTCCGGCTGAGCAT  
CTAATTCAAAATATGCCCTAGTAGGGGGCACTGCGGGGCTGTCGCACAAACAATTTCTT  
ACGAAGTTAGCCTTGGACTCATCTTGCTAAACATTATCATCTTTACCGGAGGCTTCA  
CACTTCAAACCTTTAACACAGCCCAAGAGGCCATTTGACTAGTAGTGCCCGCTTGAC  
CACTGGCTGCCATATGATATATCTCCACTCTTGCCGAAACAAACCGTGCACCCTTCG  
ACTTAACAGAAGGAGAGTCTGAACTTGTCTCGGGCTTCAACGTAGAGTACGCAGGC  
GGACCCTTCGCCTTGTTCTTCTTGGCCGAATATTCAAATATTCTCCTAATAAATACCC  
TGTCCGCTACACTATTTTTAGGGGGCCTCCCACATTCCATCTATCCCAGAATTAACCAG  
TATCAATATTATGACTAAAGCAGCCCTTCTGTCAATTGTCTTCCTATGAGTCCGAGCT  
TCGTACCCGCGATTCCGTTACGACCAACTTATGCACCTCATTGAAAAAACTTTCTTC  
CACTGACTTTGGCACTAGTTATCTGACACTTGGCGCTCCCTATTGCATTGCTGGTCT  
CCCACCACAACCTATAGATGAACCCCTACATCTTGACCACTCTTCTATTTGGTTTGGGC  
CTAGGAACAACACTCACGTTTGCAAGCTCACACTGGCTCCTCGCTTGAATAGGACTT  
GAGATTAATACTAGCCATTATTCCCCTAATAGCCCAACATCACCAACCCCGGGCA  
GTCGAAGCTACCACTAAGTACTTTCTCGCACAAGCCACAGCAGCCGCCACCCTCCTG  
TTTGCGAGTACTACCAACGCTTGACTCACAGGCCAATGGGACATTCAACAGATAAC  
ACATCCCCTCCCAACAACAATGATTGTTATTGCCCTCGCACTAAAAGTCGGACTGGC  
ACCAATGCACTCTTGACTTCCCGAAGTACTCCAAGGACTAGACCTAACCACCGGACT  
TATCCTCTCAACCTGACAAAACTTGCACCCTTTGCCCTCTTACTACAAATTCAAAC  
AACAAACCCTACGCCTCTAATCATTATTGGCTTACTATCCACGCTCGTTGGTGGCTGA  
GGTGGTCTCAACCAAACCCAGTTACGCAAAGTCCTCGCCTACTCCTCAATTGCCAC  
CTTGGCTGAATAATGCTGATCGTTCAATTTTCACCCCTCCTTGCCCTTCTCACCCCTCC  
TCACGTACTTTCTATGACTTTCTCAGCATTCCCTAATTTTTAAAGTAAATAAAGCCACC  
ACTGTCAATGCCCTCGCAATCTCGTGAACAAAGACTCCTGCCCTCACAGCCCTAGCA  
CCCCTGGTTTTACTATCCCTCGGCGGCCTTCCCCCCCCTTACCGGCTTCATACCCAAGT  
GATTTATTCTTCAGGAAGTACTAAGCAAGACCTTCCACACTTGCCACCCTCGCCGC  
TTTAACTGCCCTCTTGAGTCTCTACTTCTACCTCCGTCTCTCGTATGCAATAACCCTC  
ACAATATTCCCCAACAACCTCATTGGCGTCACTCCCTGACGATTCTACTCCCCCAA  
TTTACGCTTCCCCTCGCCGTCTCCACTGCAGCAACCACCCTTCTTCTCCCACTAGCCC  
CCGCTGCCGTAGCACTACTGGTCACCTATGAGCCTTCTTCTAACCATCATTTTCGATTG  
CCACCCTCCTCTCGACAGTACTTGCCCTTGTGTCCTTTTGATTACCCCAAATTACACC  
AGACCACGAAAACTATCACCTTACGAGTGCGGGCTTTGACCCGATAGGATCCGCCC

GACTGCCTTTTTCTACTGCGGTTTTTCTCATCGCCATCCTCTTTCTTCTATTTCGATTTA  
GAAATTGCTCTCCTCCTCCCTCTTCCATGAGGAGACCAACTAGCATCACCCTACTG  
ACATTCACCTGAGCTACAGCTGTCCTAGCCCTTCTAACCCTTGGCCTCATTACGAAT  
GAATGCAAGGGGGTCTAGAATGGGCGGAATATGCTAAAAGTCCTAATCCCAACACT  
TATGCTAATCCCAACAGCCTGGTACTCAAACCCAACTGACTCTGACCCATGACTTT  
AATGTATAGCTTTTGCATCTCCTTGGTCAGCCTTTCGTGACTAAAAAACCTCTCAGA  
AACCGGCTGATCGTCACTTAGCCTCTTTATAGCTACCGACTCCCTATCGACCCCCCTC  
CTCGTTCTTACATGCTGATTACTCCCCTAATAATTTTGGCAAGCCAGAAACACACA  
GCCTTAGAACCTCTTAGTCGCCAGCGCATGTACATCACACTTCTCGCCTCCTCCAGTT  
CTTCCTAATCCTAGCATTTAGCGCCACCGAACTGGTAATGTTTTACGTAATATTTGAA  
GCCACCCTTATCCCCACGCTAATCATTATCACCCGCTGAGGAAACCAACAGAACGT  
CTAAACGCAGGAACCTACTTTCTCTTCTATACATTAGCGGGCTCACTCCCCCTTCTCG  
TTGCTTTACTCCTACTCCAAAACACATCCGGCACCCCTATCGTTGTTAACCTTCACTA  
CACGGACCCGCTCGCTCTCGTCTTATGCAGACAACTATGATGAGCAGGCTGTCTTT  
TAGCATTCTGGTTAAAATACCCCTCTACGGAGTCCACCTATGGCTCCCTAAAGCCC  
ATGTTGAAGCTCCAATTGCAGGCTCAATAATCCTTGCAGCAGTTCTACTGAAGCTAG  
GGGGATACGGCATGATCCGCATGATAACGATATTGGAACCTCTAACTAAGGAATTA  
AGCTACCCCTTCATTGTCTTTGCACTTTGAGGGGTAATTATAACTGGCTCAATTTGTC  
TACGCCAGACAGACCTTAAGTCCTTAATTGCCTACTCATCAGTCAGCCACATGGGGC  
TAGTGGCTGGGGGAATTCTTATTCAATCACCCCTGAGGCTTAACAGGAGCCCTCACCC  
TCATAATTGCACACGGTCTTACTTCATCAGCCCTCTTCTGCTTGGCAAACACAACT  
ATGAACGAACCCACAGTCGAACAATGGTCCTGGCGCGAGGACTTCAAGTAGCCCTA  
CCACTAATAGCCACTTGATGGTTTATTTCTAGCTTGGCCAACCTAGCTCTGCCACCAC  
TACCCAACCTCATGGGGGAGCTGATAATTATCACTTCTTTATTCAACTGGTCCTGGT  
GAACTCTGGCATTAAACCGGTGCAGGCACTCTAATCACAGCTGGTTACTCCCTTTACA  
TATTCTTAATAACTCAACGGGGGCCCTCTCCCAACACATGTCATTGCACTTGAGCCAT  
CTCACACCCGAGAACACCTTCTTATCGCCTTCACCTTATCCCCTTAATTCTGCTCGTA  
CTTAAGCCCGAGCTGATCTGAGGCTGAACTGCCTATGACCCCCACACACTTTGCCTT  
CTCCTCAGCCTTTCTTCTGGGTTTAACAGGCCTGGCATTCCACCGGTTTCACCTCCTT  
TCCGCTCTATTGTGCCTTGAAGGAATAATACTATCCCTATTTATTGCTCTTTCCCTAT  
GAACGCTCCAACCTTGATTCAACCAGCTTTTTCAGCATCTCCAATACTTCTGCTTGCATT  
TTCAGCCTGCGAAGCAAGCGCCGGTCTCGCCCTATTAGTAGCCACTGCTCGAACCCA  
CGGGACCGACCGATTACAAAGCCTAAATCTTCTCCAATGCTAAATGTGCCCCACCTC  
CCTAATGATTTTCATCGAGCCTGATCACAATCTTTGCATTACTAGCCTATCCTTTAATC  
ACCACGATCCGTCTACACCTCGAGGCCCTCAATGAGCTACCACCCATGTCAAACA  
GCTGTAAAAATAGCTTTCTTTGTTAGTCTGCTACCCCTGACCCTATTTCTTAATGAGG  
GCGCAGAAACAATCGTTACTAATTGAACCTGAATAAATACTAACTCCTTCAATATCA  
ACATTAGCTTGAAATTTGATTTCTACTCAATTATTTTTACACCCATTGCCCTCTACGT  
AACTTGGTCCATCCTGGAGTTCGCATCATGATACATGCACGCAGACCCACACATGAA  
CCGCTTCTTTAAATACCTCCTGACGTTTCTGATTGCCATAATCGTCCTAGTAACTGCA  
AACAAATATGTTTCAACTATTTATCGGCTGGGAGGGAGTGGGGATCATATCGTTCTTA  
CTTATTGGATGGTGGTTCGGACGGGCGGATGCTAACACTGCAGCGCTTCAAGCAGTA  
ATTTACAACCGAGTAGGAGACATCGGACTTATCTTCGCCATGGCTTGAATAGCAGCA  
AACCTAACTCCTGAGAGATACAACAAATCTTTGCAACCACCAAGGACATAGACTT  
AACCTACCTCTTCTCGGACTCATCATTGCAGCAACTGGCAAATCGGCTCAATTCGG  
ACTTACCCCTTGACTACCCTCCGCTATGGAGGGTCCCACACCGGTCTCTGCCCTACTT  
CATTCTAGCACTATGGTCGTTGCCGGCATTTTCTGCTAGTACGAATAAGCCCCCTCC  
TGGAACAACCAACCGCCCTCACAACCTGCCTATGCCTCGGAGCTCTTACAACAC  
TATTCACTGCAACCTGTGCCCTCACGCAAAATGATATTAAAAAATCGTCGCATTCT  
CTACATCCAGCCAGCTTGGGCTTATAATGGTAACCATTGGTCTAAACCAACCACAAC  
TAGCATTTCTTCACATCTGTACACATGCCTTCTTCAAGGCCATACTGTTTTTATGCTC  
CGGATCTATTATCCACAGCCTAAATGATGAACAAGATATCCGCAAAATAGGGGGCA

TACACCACCTTGCACCTTTTACATCCTCTTGCCTAACTATTGGCAGCCTCGCCCTCAC  
AGGAACCCCTTCTTGGCTGGCTTCTTCTCTAAAGATGCCATCATCGAAGCATTGAA  
CACATCCCACCTAAACGCCTGAGCCCTAACCTTAACCCTCCTAGCCACCTCTTTCAC  
AGCAATCTACAGCTTTCGAGTAGTATTTTTTTGTACCCATGGGGCCACCCCGATTAGT  
CCCTCTCTCCGATCAACGAAAACAACCCAGCAGTAATTAACCCACTTAAGCGACTAG  
CATGGGGAAGTATCGTTGCAGGCTTACTAATTACCTCTAATATTACACCCTTAAAAA  
CCCCTGTCATATCTATGCCTCCTCTCCTTAAACTAGCTGCTCTTGCAGTTACAATCAT  
CGGCCTTCTTGTGCTATAGAGCTCGCCATATTAACCAACAAGCAATATGAGCCAAT  
ACCCGGCAGACATACACCCTTCTCTGCCTTATTAGGCTTCTTCCCCGGGGTCATA  
CACCGCCTAACCCCTGTATTGCTCTTCTTCTTAGGCCAAAACATTGCTAACCAACA  
GTAGATCAGACATGATTAGAAAAAACAGGCCCCAAAGCCATTGAATCCGCTAACCG  
ACCTCTAGTGTCTCTACAAGTAATATTCAACGGGGGGTGATCAAAACATATCTTCC  
CTCTTCTCCTAACACTAGCCCTTATAATCCCCCATATTCATCACCTAATGACTTTCGC  
TATATATTTAGTTTTATTTTCTCTTGTGTTGGGGTTAGTTGCAGTTGCTTCTAATCCGT  
CCCCTTATTTTGTGCTTTGGGTTTGGTTGTGGTAGCTGGCATGGGGTGTGGTATATT  
AGTTGGGCATGGAGGGGCCCTTTTGTCACTAGTCCTGTTCTTAATTTACTTAGGCGGG  
ATGTTAGTTGTATTTGCATATTCAGCAGCGTTAGCTGCTGAGCCGTACCCAGAGAGC  
TGGGGTAGTTGGTCGGTAATGGTCTACGGTTGTCTATACAGGAGGAGTATTATAGTT  
TCTGGATTGTTTTGAGGGGGGTGGTATGAATCTTCTTGGGTCTTAGCAGATGAGTTG  
GGGGAGTTTTCCGTATTTTCGAGGGGATATCGGAGGGGTAGCCTTAATACTCTTCT  
GGGGGGTGGTTGTTAATCACTAGTGCATGGGTATTGCTCTTAACCTTGTGTTAGTCC  
TTGAGTTAACCGGGGTATGAGCCGAGGGGCGTTGCGACGGTTT

*Limanda aspera*\_KP013094

ATGATACTAAGCTTCTTTGATCAATTTATGTCCCCCGTATTTCCTGGGCATCCCCCTAA  
TTGCCCTGGCAATTACACTGCCCTGAACGCTGTTCCCAGCCCCCTGTCTTCGCTGACTA  
AATAATCGTATAGTTTCACTTCAAGGATGATTCATTAGCGGCTTCACATCTCAACTTC  
TCCTCCCCTAAACCCAGCCGGACACAAGTGAGCCATTTTATTTGCCTCATTAATCTT  
TTCTTTTTCTATTAACATGCTCGGACTCCTTCCATACACATTTACACCTACAACCTCAA  
CTCTCCCTTAACCTCGGCCTCGCAGTTCCACTCTGATTGGCAACTGTCATTATGGCAT  
GCGAAACCAGCCAACAGTCGCCCTAGGCCACCTTCTTCCAGAAGGGACCCCCACTCT  
TCTTATCCCAGTACTAATTATTATCGAAACAATTAGCCTGTTTATTCGACCTCTCGCT  
CTTGGTGTTCGACTTACAGCAAATCTTACAGCTGGCCACCTGCTCATTCAACTCATTG  
CAACAGCTGCCTTTGTTCTTCTTCCGCTTATGCCTGTCGTTGCTATTTTAAACAGCAAC  
AGTTCTCTTCTCCTAACTCTCCTAGAAAGTTGCCGTTGCTATAATTCAAGCCTACGTC  
TTTGTGTTTACTCCTAAGTCTTTACCTACAAGAAAACGTCTAATGCCTCAACTGGACCC  
CGCACCCCTGATTTGCAATTTTGGTTTTCTCTTGAATAATCCTTTTAACTGTTATTCCCC  
CAAAAGTTTTAGCTCACACCTACCCCAATGAGCCAACCTCCCAAAGCACACAAAAA  
CAAAACAGAGCCCTGAAACTGACCATGATACTAAGTGGAATCACACGTTGATTTTT  
CTCGACCAATCACAAAGACATCGGCACCCTCTATCTCGTATTTGGTGCCTGAGCCGG  
AATAGTGGGGACAGGTCTAAGTCTGCTCATTGAGCAGAACTCAGCCAACCTGGGG  
CTCTCCTGGGAGACGATCAAATTTATAACGTGATCGTTACCGCACACGCCTTTGTAA  
TAATCTTCTTTATAGTAATACCAATTATGATCGGAGGGTTTCGGAAACTGACTTATCC  
CACTAATGATCGGGGCCCCCTGATATGGCATTCCCTCGAATGAACAACATGAGTTTCT  
GACTTCTGCCTCCATCCTTTCTTCTCCTCCTAGCCTCTTCAGGCGTAGAAGCCGGGGC  
TGGAACCTGGGTGAACTGTATATCCTCCGTTAGCTGGAAATCTAGCACACGCTGGAGC  
ATCCGTAGACCTAACAATCTTTTCTTTCACCTTGCCGGGATTTTCATCAATCCTGGGA  
GCAATCAACTTTATTACCACAATCATCAACATGAAACCTACAGCAGTAACTATGTAC  
CAAATCCACTATTTCGTGTGAGCCGTAATAATTACAGCCGTTCTTCTCCTCCTCTCCC  
TTCCAGTCTTAGCCGCTGGCATCACAAATGCTACTGACAGACCGCAACCTAAACACAA  
CTTTCTTTGACCCTGCCGGAGGGGGTGACCCCATCCTCTATCAACACCTATTCTGATT  
CTTTGGCCACCCAGAGGTATATATTTTAAATTCTTCCAGGCTTCGGGATAATTTCTCAC  
ATTGTTGCATATTATGCAGGTAAGAAAGAACCCTTTGGCTATATAGGAATAGTCTGA

GCTATGATGGCTATTGGACTCCTGGGCTTCATCGTATGGGCTCATCACATGTTTACA  
GTTGGAATAGACGTGGACACACGAGCCTACTTTACTTCTGCCACAATGATTATCGCC  
ATCCCAACTGGCGTAAAAGTCTTTAGCTGACTCGCAACCCTCCACGGAGGAAGCATT  
AAGTGAGAAACCCCACTTCTGTGAGCCCTAGGCTTTATTTTCCTGTTACAGTAGGA  
GGTCTTACTGGTATTGTCTTAGCTAATTCCTCTCTCGACATCGTCCTCCATGACACAT  
ACTATGTAGTAGCCCACTTCCACTATGTACTATCCATGGGTGCTGTGTTTGCAATCGT  
TGCCGCCTTCGTACACTGATTCCCCCTATTTACAGGCTACACCCTCCACTCCGCATGA  
ACAAAAATTCACTTTGGCCTCATGTTTGTAGGTGTAAATCTCACATTCTTCCCCCAAC  
ATTTCTTGGCCTTGCCGGAATACCTCGACGGTACTCGGACTACCCAGATGCATATA  
CCCTTTGAAATACTGTCTCATCAATCGGATCACTAATGTCCCTCGTTGCTGTGATTTT  
ATTTTTGTTTATTATTTGAGAAGCATTACAGCCAAACGAGAAGTCGGGGCAGTAGA  
ACTAACTTCAACTAATATCGAATGACTCTACGGCTGCCCCCACCCTATCACACATT  
TGAGGAGCCCGCATTTCGTCCAAGTTCGTATAAACTAAATGGCACATCCGTCACAACT  
GGGGTTTCAGGACGCAGCTTCCCCCCTAATAGAAGAACTACTTCACTTCCATGATCA  
CGCCTTAATAATTGTTATTCTCATCAGCGCAATAGTGCTTTATATTATTGTGGCAATG  
GTCACGGCCAACTAACCGACAAGCTTGTCTTAGACTCCCAAGAAATTGAAGTAAT  
CTGGACAGTTCTCCCAGCTATTATCCTAATTCTCATCGCCCTCCCGTCTCTCCGCATT  
TTATACCTGATAGACGAAATTAACGACCCCCATCTAACCATCAAAGCATTAGGTCAC  
CAATGATACTGAAGCTACGAATACACAGACTACCAAGACCTTGGTTTTGACTCTTAT  
ATAATCCCAACACAAGACCTGACCCCTGGGCAGTTCCGACTACTTGAAGCAGATCA  
CCGAATGGTGATTCTTGTGAATCCCCAATTCGAGTCTTATTTTCAGCTGAAGATGTT  
TTACATTCTGAGCAGTCCCCTCCCTGGGCGTAAAAGTTGATGCTGTACCTGGCCGA  
TTAAACCAAGCAACCTTTATTGTTAGCCGACCTGGCGTATTCTACGGCCAATGCTCT  
GAGATTTGCGGGGCAAACCACAGTTTTATACCCGTCGTTGTAGAAGCAGTCCCCTT  
GACCACTTTGAGAACTGGTCTTCGCTAATAATTGAAGACGCCTATGGCCCCCTCAAGC  
GCACCCGTACCACATAGTCGACCCTAGCCCATGACCCCTCACGGGGGCTATCGCTGC  
CCTATTGATAACATCTGGCCTTGCTATCTGATTCCACTTCCACTCTACCACCCTAATA  
ACTATTGGAACAGTCCTTCTTATTCTAACAGTCTTCCAGTGATGACGAGATGTCGTTT  
GAGAAGGTACATTCCAAGGACACCATACCCCTCCCGTTCAAAAAGGCCTCCGATAC  
GGTATGATCTTATTTATTACCTCAGAAGTCCTATTTTTCTTAGGCTTCTTCTGGGCTTT  
TTATCACTCAAGCCTCGCACCTACGCCTGAACTAGGAGGTTTCTGACCACCCGCAGG  
CATCACACCTTTAGACCCATTTGAAGTCCCGCTTCTAAATACAGCAGTCCTACTTGC  
CTCTGGCGTAACTGTTACATGGGCACATCACAGTATTATAGAAGGCGAACGAAAAC  
AAGCTATCCAATCTCTTGCTCTCACAATTTTACTCGGTGGCTACTTTACCTTCTCCA  
AGGCCTTGAATATCACGAAGCCCCCTTACCATTGCAGACGGAGTTTATGGTGCCAC  
ATTCTTTGTTGCTACCGGCTTCCACGGACTTCACGTCTTAGTGGGCTCCTCTTTCTTA  
GCCGTTTGTTTATTACGCCAAATTCTGCACCACTTTACATCCGACCACCATTTTGGCT  
TCGAGGCAGCCGCATGATACTGACACTTTGTAGACGTCGTCTGACTCTTCCTCTATA  
TCTCTATTTACTGATGAGGATCTTAATGGCCAATCTCCGTAAATCCCACCCCTCCTT  
AAAATCGCAAACGATGCTCTAGTAGACCTCCAGCCCCGCAAACATCTCTGTCTGA  
TGAAACTTCGGGTCTCTTTTAGGACTCTGCTTAGTAACCCAGATCGCTACCGGCTTAT  
TCTTAGCCATACACTACACATCAGATATTGCTACTGCCTTTACCTCCGTCGCACACAT  
CTGCCGGGACGTCAACTACGGCTGACTTATCCGAAGCATTTCATGCCAATGGAGCATC  
ATTCTTTTTTCATTTGCATCTACCTTCATATTGGCCGTGGTCTCTACTATGGTTCTTACC  
TCTATAAAGAAACGTGAACTATTGGTGTTGTTCTTCTACTTCTCGTAATGATGACCGC  
CTTCGTTGGTTACGTACTTCTTGAGGACAAATGTCCTTTTGAGGTGCAACCGTCATT  
ACCAACCTTTTATCCGCAGTCCCCTACGTTGGGGGCTCCCTTGTCCAATGAATCTGA  
GGTGGCTTTTCTGTAGATAATGCAACCCTTACCCGATTCTTTGCATTCCACTTCCTTT  
TCCGTTTCATTATCGCAGCCGCCACAGTAATTCATCTCCTCTTCTCCACGAAACCGG  
TTCAAACAACCCACCGGTTTAAACTCAAACCTCCGATAAAGTCCCATTTACCCCTTA  
CTTCACATACAAAGACCTTTTGGCTTTGCAGTCCTTCTTACTGCCCTAGCTTCCCTCG  
CCCTCTTCTCCCCCAACCTTTTAGGAGACCCGGACAACCTTACCCCTGCAAACCCAC

TTGTTACACCCCCACATATCAAGCCCGAATGATATTTCTGTTTGCCTACGCCATTCT  
CCGTTCCATTCCAAACAACTTGGAGGTGTTCTTGCCCTCTTATTCTCCATCCTAGTT  
CTCATACTTGTCCTTTCTCCACACCTCCAAACAACGGAGCCTTATGTTCCGCCCTG  
TAACACAGTTTTCTGTTTTGGTCTTTAGTAGCTGACGTAATAATTCTGACTTGAATTGG  
AGGAATACCCGTTGAGCACCTTTTCGTTATCATTGGCCAAGTAGCATCTATTATCTA  
CTTCTCGCTCTTCCTAGTCCTTATCCCAACAGCAGGATGAATAGAAAACAAAGTCCT  
CGGATGAAACTATGATTTCAACCCTCATTACGCATATTATTAACCCACTAGCCTTTAT  
TGTCCCCGTCTTGTTAGCCGTAGCATTCTGACTCTCCTTGAACGAAAGGTGCTAGG  
TTATATACAACTCCGAAAAGGTCCCAATATCGTTGGGCCTTACGGCCTCCTTCAACC  
TATTGCTGACGGCGTAAAACTCTTCATTAAGGAACCCGTTTCGCCCTTCAACCTCCTC  
ACCAGTTTTATTCTTTTGTACCCATACTTGCGCTAACGCTAGCCCTTGCACCTTTGA  
GCCCCCATGCCTTTTCCATACCCTGTTGTGGACCTCAACCTGGGGATTTTATTTATTC  
TAGCCTTGTCTAGCCTTGCAGTATACTCCATCCTCGGATCAGGCTGAGCATCCAATT  
CGAAGTATGCATTAATAGGAGCACTACGTGCTGTTGCACAAACAATTTCTTACGAGG  
TCAGCCTCGGACTCATCTTACTTAGCATCATTATCTTTGCAGGAGGGTTTACACTCCA  
AACCTTTAACACAGCCCAAGAGGCCATTTGACTCGTAGTGCCCGCCTGACCACTGGC  
TGCCATATGATACATCTCCACCCTTGCCGAAACAACCGTGCACCATTGACCTGAC  
CGAGGGGGAATCTGAACTTGTCTCAGGCTTCAACGTAGAGTACGCAGGTGGACCCT  
TCGCTTTATTCTTTTAGCCGAATATTCAAACATCCTCCTAATAAACACACTGTCCGC  
AACACTATTTTTGGGCGCCTCGCACATTCCAAACATCCCAGAATTAACAAGCATCAA  
CTTAATAACTAAAGCCGCCCTTCTCTCAGTTGTTTTCTCTGGGTCCGAGCTTCGTAC  
CCGCGGTTCCGTTATGACCAGCTTATACACCTCATTGAAAAAATTTCTTCCACTAA  
CGCTGGCGCTGGTTATTTGACACTTAGCGCTCCCTATTGCATTGCTGGCCTCCCACC  
TCAGCTGTAGATGAACCCCTACATCTTGACCACCCTTCTATTTGGTTTGGGCCTAGGT  
ACAACACTGACATTTGCAAGCTCCCACTGACTTCTCGCGTGAATAGGCCTTGAAATT  
AATACACTAGCCATTATTCCACTAATAGCCCAACACCACCACCTCGGGCGGTTGAA  
GCCACTACTAAATACTTCCTGGCACAAGCCACAGCAGCGGCCACCCTCCTGTTTGCA  
AGCACCAACGCCTGAATTACCGGACAATGAGATGTTCAACAGATAACACATCC  
GCTCCCCACAACAATAGTTGTGATCGCCCTAGCACTAAAAATTGGACTAGCCCCTAT  
ACACTCCTGACTCCCCGAAGTTCTTCAGGGCCTAAGCCTCACACAGGTCTTATTTT  
ATCAACCTGACAGAAGCTTGCACCTTTTGCTCTTCTATTACAAATTCAAACGACAAT  
CCTACGCCTCTAATCATTATTGGCCTTCTCTCTGCCCTTGTAGGGGGCTGAGGTGGTC  
TCAACCAAACACAGCTGCGCAAAGTTCTTGCCCTACTCCTCAATCGCCACCTTGGTT  
GAATAATACTTATCCTTCAATTTTCTCCACTCCTGAGCCTCCTTGCACCTGCTGACATA  
TTTTCTATGACCTTTTCAGCTTTCTCATCTTCAAAGTAAACAAGGCCACTACTGTTA  
ATGCACTCGCCATCTCTTGGGCAAAACTCCGGCCCTCACAGCCCTAGCACCCCTTG  
TTTTACTTTCCCTCGGGGGCCTTCCCCCACTTACCGGCTTTATACCAAAGTGGTTTAT  
TCTTCAAGAACTTACCAAACAAGATTTACCACACTAGCTACTCTCGCTGCACTAACT  
GCCCTCTTGAGCCTCTACTTCTACCTACGTCTCTCGTATGCTATGACCCTAACGATAT  
TTCCCAATAACCTCATTGGCATGACCCCTGACGATTCTCAACTCCCAATTTACCCT  
TCCCTCGCCGTTTCCACTGCGGCGACCACCCTCCTCCTGCCATTGGCACCTGCTGCC  
GTAGCACTCCTCGTCACCTATGAGCCTTCTTCTAACCATCATTTCATCACCGCCCTC  
CTATCAACGGTACTTGCCATTGTGTCTTTTTGACTTCCCCAAATTACGCCGGATTATG  
AAAAGCTGTCACCGTACGAGTGTGGCTTTGACCCCATTTGGTTCCGCCCGACTACCCT  
TCTCGATGCGATTTTTTCTCATCGCCATCCTCTTTCTTCTGTTTCGACTTAGAAATTGCA  
CTTCTCCTCCCGCTCCCCTGAGGCGACCAACTAGCGTCCCCTCTACTTACATTTACCT  
GAGCTGCAGCAGTTCTATCGCTCCTAACCCTTGGCCTCATCTACGAATGAGTACAAG  
GAGGCCTAGAATGGGCTGAATATGCTAAAAATTCTAATTCCAACACTTATGCTAATC  
CCAACAGCCTGACTACTTAAACCTAGCTGGCTCTGGCCCATAACTTATTGTATAGC  
TTTTGCATCTCCTTAATTAGCCTCTCGTGACTAAAAAACCTCTCGGAAACCGGCTGA  
TCCTCACTCAACCTATTTATAGCCACCGACTCTTTATCAACCCCCCTCCTTGTCTGA  
CATGTTGGCTACTTCCGCTAATAATCTTAGCAAGCCAAAAACACACGGCCTCAGAGC

CGCTCAGTCGGCAGCGCATGTATATTTTCGCTTCTCGCCTCCTTCAATTTTTCTGATT  
CTAGCATTTAGCGCCACAGAGCTGGTGATGTTTTACGTAATATTTGAAGCTACCCTT  
ATCCCGACACTGATCATTATCACTCGCTGAGGGAACCAAACAGAGCGCCTAAATGC  
GGGAACCTACTTCCTGTTCTATACCCTGGCTGGCTCACTTCCTCTTCTTGTGCTTG  
CTGCTACTCCAAAACACATCCGGAACCTCTCTCATTATTAACGCTCCACTACACGGAC  
CCGCTCGCTGTCTCTCTATGCAGACAAATTATGATGAGCCGGATGTCTTCTAGCTTTC  
CTAGTTAAAATGCCACTTTATGGCGTTCACCTCTGACTTCCCAAAGCACATGTTGAA  
GCCCCAATTGCAGGCTCAATAATCCTTGCAGCAGTTTTACTTAAGCTAGGAGGCTAC  
GGCATAATCCGTATAATAACAATACTAGAGCCTCTAACC AAAGAATTAAGCTACCC  
CTTTATTATCTTTGCACTCTGAGGCGTAATCATGACCGGCTCAATTTGCCTACGACAA  
ACGGACCTTAAGTCATTAATTGCCTACTCCTCTGTTAGTCACATGGGCCTCGTGGCC  
GGAGGGATTCTCATTCAATCACCTGAGGGCTCACGGGTGCACTTACACTTATAATC  
GCCACGGCCTCACCTCCTCAGCCCTATTTTGCCTAGCAAATACAACTATGAACGA  
ACACACAGCCGTACAATAGTATTAGCACGAGGACTTCAAGTGGCCTTACCCCTAATG  
GCCACTTGATGATTTTGTCTCCAGCCTAGCCAACCTGGCCCTGCCCCACTGCCTAAC  
CTTATGGGGGAGCTGATGATTATCACCTCCCTTTTTGACTGGTCCTGATGAACACTG  
GCACTTACAGGGTCCGGGACTCTTATTACCGCTGGCTACAGCCTCTATATATTCTTA  
ATGACTCAACGAGGTCCTCTCCCAACACATGTAATTGCACTTGAACCCTCACACACC  
CGAGAACATCTTCTTATTGCCTTCACCTCATCCCTCTTGTCTCCTCGTTCTTAAGCCC  
GAGCTGATCTGAGGCTGAACTGCCTATGACCCCTACACACTTTGCCTTCTCCTCAGC  
CTTTTTTCTAGGTTTAACAGGCCTGGCATTCCACCGGTCCACCTCCTTTCCGCACTA  
TTGTGCCTTGAAGGGATGATACTGTCCCTTTTTGTTGGCCTCTCCCTGTGAACCTTAC  
AACTAGACTCAACTAACTTTTCAGCATCTCCATTACTCCTGCTTGCCTTTTCAGCCTG  
TGAAGCAAGCGCCGGGCTCGCCCTTCTAGTAGCCACTGCCCCGAACCCACGGAACCTG  
ACCGACTGCAAAGCCTAAACCTCCTCCAATGCTAAATGCACCCACCTCCCTAATGA  
TCTCATCAAGCTTGATTACAATCTTTGCATTACTAGCCTACCCACTGGCCACCACATT  
CCGTCTACGCCTCAGGGGCCTCAATGAGCCACATCTCATGTCAAAAACAGCTGTAAA  
AATAGCTTTCTTTGTTAGCCTCTTACCCCTTGCCCTGTTCCCTAATGAAGGTGCCGAG  
ACAATTGTTACTAACTGGGCCTGAATGAACACTAACACCTTTAACATCAACATCAGC  
CTAAAATTTGACTTTTACTCGATTATCTTTACTCCTATTGCCCTCTACGTTACTTGGTC  
CATTCTAGAGTTCGCATCATGATACATACACGCTGACCCACACGTAAACCGCTTTTT  
CAAGTACCTTTTAACGTTTCTTATTGCTATAATTATCCTAGTAACTGCAAACAACATA  
TTTCAACTCTTTATCGGGTGAGAGGGCGTAGGGATCATATCGTTCCTCCTCATTGGA  
TGATGGTACGGACGGGCGGATGCTAATACTGCAGCACTTCAAGCAGTACTGTACAA  
CCGGGTCCGGGACATCGGACTCATCTTCGCCATAGCTTGAATAGCAACAAACCTAA  
ACTCCTGGGAAATACAACAAATCTTTGCGACCTCTAAGGGTATGGACTTAACCTACC  
CCCTCATTGGACTAATCATCGCGGCAACCGGGAAATCAGCTCAATTTGGGCTCCACC  
CTTGGCTGCCCTCAGCCATGGAAGGTCCTACACCGGTATCTGCCCTACTTCATTCTA  
GCACTATAGTCGTGGCCGGCATCTTCTCCTGGTACGAATGAGCCCACTTCTGGAGA  
ATAACCCGGCTGCCCTCACAACTGCCTCTGTCTCGGGGCCCTTACGACCCTGTTCA  
CTGCAACCTGCGCCCTCACACAAAATGATATTA AAAAAAATCGTCGCATTTTCTACAT  
CTAGTCAGCTCGGGCTCATAATGGTAACCATTGGGTTAAACCAACCTCAACTAGCAT  
TTCTACACATCTGTACACACGCCTTCTTTAAAGCCATACTATTTCTTTGCTCGGGGTC  
TATTATTCACAGCCTAAACGATGAACAGGACATCCGAAAAATAGGCGGTATGCACC  
ACCTTGCACCTTTTACATCCTCTTGCTTGACAATTGGAAGCCTCGCACTTACGGGAA  
CTCCCTTCTTAGCTGGTTTCTTCTCTAAAGATGCCATCATCGAAGCATTAAACACATC  
CCATTTAAACGCCTGAGCCCTAACCCTAACCCTCCTGGCCACATCTTTTACAGCAAT  
CTACAGCTTCCGCGTAATTTTCTTTGTGCCTATGGGCCACCCCCGATTTAATCCATTT  
CCCCTATTAACGAAAATAACCCCGCAGTGATTAATCCACTTAAACGCCTAGCATGAG  
GAAGTATCCTTGCAGGACTACTAATTACCTCAAATATTACACCCCTTAAACCCCCG  
TGATGTCCATGCCTCCCCCTCTAAACTAGCTGCCCTTGCAGTTACAATTATCGGCCT  
ACTTATTGCCATAGAACTCGCTATATTAACCAACAAGCAATTTAAATCAACACCTGT

CTTAACGTACACAACTTCTCTAATACTAGGCTTTTTCCCCGCCATTGTACACCGCC  
TAACCCCTAAATTAGGGCTCGTTTTTCGGCCAGGACATTGCTAACCAGATAGTGGATC  
AAACCTGACTAGAAAAGGTAGGCCCCAAAGCCATTGTATCCTTCAACCAACCATTA  
GTCTCTACGACAAGTAATATTCAACGAGGAATAATCAAGACCTATTTACCCTTTTCC  
TTCTAACACTAGCCCTTATTGTCGCAATGACCCTCGCACAATGGCTTTTGTTATATAT  
TTTATTTTATTTTTCTTCGTGCTGGGGTTAGTTGCAGTTGCTTCTAATCCGTCGCCCTA  
CTATGCTGCTTACGGCTTAGTTGTGGTAGCCGGGATGGGGTGTAGTGTATTAATTGG  
GCATGGGGCGCCCTTTCTATCTATAATTCTTTTCCTAATTTACTTGGGGGGAATGCTA  
GTTGTATTTGCATTTGCAGTAGCAATAGCTTCTGAGCCGCACCCAGTCGGCTGGAAT  
TCTTGGGCTGTATTGGGCTACGCTTGTCTACATGGCAGCAGTAGCGTAGTTGCTGGG  
GCGCTTTGAGGGGGATGATATGAATCGTCTTGAGCTACAGTAGATGGTTTTGCGGAG  
ACGGGGGTGTTTCGGGGTGACCTGGGCGGGGTAGCCATGATTTATGGTTCTGGGGG  
AGGGCTGTTAGTTATCAGTGCGGGGGTATTGCTTTTAACGCTGCTTGTAGTCCTTGA  
GTTAGCCGGCCCATGTGCCGAGGGTCATTGCGACAATAA

Limanda limanda\_MN122886

ATGATACTAAGCTTCTTTGATCAATTTATGTCCCCGTATTCCTGGGCATTCCCCTAA  
TTGCCCTGGCAATTACACTGCCCTGAACGCTGTTCCCAGCCCCCTGTCTTCGCTGACTA  
AATAATCGTATAGTTTCACTTCAAGGATGATTCATTAGCGGCTTCACATCTCAACTTC  
TTCTCCCCTAAACCCAGCCGGACACAAGTGAGCCATTTTATTTGCCTCATTAATCTT  
TTCTATTTCTATTAATATGCTCGGACTTCTTCCGTACACATTTACACCTACAACCTCAA  
CTCTCCCTTAACCTCGGCCTCGCAGTTCCACTCTGACTGGCAACTGTCATTATGGTAT  
GCGAAACCAACCAACAGTCGCCCTAGGCCACCTTCTTCCAGAAGGGACCCCCACAC  
TTCTTATCCCAGTACTAATTATTATCGAAACAATTAGCCTGTTTATTTCGACCTCTCGC  
TCTTGGTGTTTCGACTTACAGCAAATCTTACAGCTGGCCACCTGCTCATTCAACTCATT  
GCAACAGCTGCCTTTGTTCTTCTTCCGCTTATGCCTGTCGTTGCTATTTTAACAGCAA  
CAGTTCTCTTCCTCCTAACCCTCCTAGAAGTTGCCGTTGCTATAATTCAAGCCTACGT  
CTTTGTTTTACTCTTAAGTCTTTACCTACAAGAAAACGTCTAATGCCTCAACTGGACC  
CCGCACCCTGATTTGCAATTTTGGTTTTCTCTTGAATAATCCTTTTAACTGTTATTCCC  
CCAAAAGTTTTAGCTCACACCTACCCCAATGAGCCAACCTCCCAAAGCACACAAAA  
ACAAAACAGAACCCTGAAACTGACCATGATACTAAGTGGCAATCACACGTTGATTT  
TTCTCGACCAATCACAAAGACATCGGCACCCTCTATCTCGTATTTGGTGCCTGAGCC  
GGAATAGTGGGGACAGGTCTAAGTCTGCTCATTCCGGGCAGAACTTAGCCAACCTGG  
GGCTCTCCTGGGAGACGATCAAATTTATAACGTAATCGTTACCGCACACGCCTTTGT  
AATAATCTTCTTTATAGTAATACCAATTATGATCGGAGGGTTTCGGAAACTGACTTAT  
CCCCTAATGATCGGGGCCCCCTGATATGGCATTCCCTCGGATGAACAACATGAGTTT  
CTGACTTCTACCTCCATCGTTTCTTCTTCTCCTAGCCTCTTCAGGCGTAGAAGCCGGG  
GCTGGAACCTGGGTGAACTGTATACCCTCCGTTAGCTGGAAATCTAGCACACGCTGGA  
GCATCCGTAGACCTAACAATCTTCTCTCTTACCTTGCCGGGATTTTCATCAATCCTGG  
GAGCAATCAACTTTATTACCACAATCATCAACATGAAACCTACGGCAGTAACTATGT  
ACCAAATTCCACTATTCGTGTGAGCCGTGCTAATTACAGCCGTTCTTCTCCTCCTCTC  
CCTTCCGGTCTTAGCCGCTGGCATCACAATGCTACTGACAGACCGCAACCTAAACAC  
AACTTTCTTTGACCCTGCCGGAGGGGGTGACCCCATCCTCTATCAACACCTATTCTG  
ATTCTTTGGCCACCCAGAGGTATATATTTTAATTCTTCCAGGCTTCGGAATAATTTCT  
CACATTGTTGCATATTATGCAGGTAAGAAAGAACCGTTTGGCTACATAGGAATAGTC  
TGAGCTATGATGGCTATTGGACTCCTGGGCTTCATCGTATGGGCTCATCACATGTTT  
ACAGTTGGAATAGACGTGGACACACGAGCCTACTTTACTTCTGCCACAATGATTATC  
GCCATCCCAACTGGCGTAAAAGTCTTTAGCTGACTCGCAACCCTCCACGGAGGAAG  
CATTAAAGTGAGAAACCCCACTTCTGTGAGCCCTAGGCTTTATTTTCTCTTACAGTA  
GGAGGTCTTACTGGTATTGTCTTAGCTAATTCCTCTCTCGACATCGTCCTTCATGACA  
CATACTATGTAGTAGCCCACTTCCACTATGTACTTTCTATGGGTGCTGTATTTGCAAT  
CGTTGCCGCCTTTGTACACTGATTCCCCCTATTTACAGGCTACACCCTCCACTCCGCA  
TGAACAAAAATTCACTTTGGCCTTATGTTTGTGGGAGTTAATCTCACATTCTTCCCCC



AGCATTTTCTTGGCCTTGCCGGAATACCTCGACGGTACTCGGACTACCCAGATGCAT  
ACACCCTATGAAATACTGTCTCATCAATCGGATCACTAATGTCCCTCGTTGCTGTGA  
TTTTATTTTGTGTTATTATTTGAGAAGCATTTACAGCCAAGCGAGAAGTCGGGGCAG  
TAGAACTAACTTCAACTAATATCGAATGACTTTACGGCTGCCCCCACCCTATCACA  
CATTTGAGGAGCCCGCATTCGTCCAAGTTCGTATAAACTAAATGGCACATCCGTCAC  
AACTGGGGTTTCAGGACGCAGCTTCCCCCCTAATAGAAGAATACTTCACTTCCATG  
ATCACGCCTTAATAATTGTTATTCTCATCAGCGCAATAGTGCTTTATATTATTGTGGC  
AATGGTCACGGCCAACTAACCGACAAGCTTGTCTTAGACTCCCAAGAAATTGAAG  
TAATCTGGACAGTTCTCCCAGCTATTATCCTAATTCTCATCGCCCTCCCGTCTCTCCG  
CATTTTATACCTGATAGACGAAATTAACGACCCCCATTTAACCATCAAAGCATTAGG  
TCACCAGTGATACTGAAGCTACGAATACACAGACTACCAAGACCTTGGTTTTGACTC  
TTATATAATCCCAACACAAGACCTGACCCCCGGGCAGTTCGGACTACTTGAAGCAGA  
TCACCGAATGGTGATTCTGTAGAATCCCCAATTCGAGTCCTTATTTTCAGCTGAAGA  
TGTTTTACATTCTGAGCAGTCCCCTCCCTGGGCGTAAAAGTTGATGCTGTGCCTGG  
CCGATTAAACCAAGCAACCTTTATTGTTAGCCGACCCGGCGTATTCTACGGCCAATG  
CTCTGAGATTTGCGGGGCAAACCACAGTTTTTATACCCGTCGTTGTAGAAGCAGTCCC  
ACTTGACCACTTTGAGAAGTGGTCTTCGCTAATAATTGAAGACGCCTATGGCCCCCTC  
AAGCGCACCCGTACCACATAGTCGACCCTAGCCCATGACCCCTCACGGGGGCTATC  
GCTGCCCTATTGATAACATCTGGCCTTGCTATCTGATTCCACTTCCACTCTACCACCC  
TAATAACTATTGGGACAGTCCTTCTTATTCTAACAGTCTTCCAATGATGACGAGATG  
TCGTTTCGAGAAGGTACATTCCAAGGGCACACACCCCTCCCGTTCAAAAAGGCCTCC  
GATATGGGATGATCTTATTTATTACCTCAGAGGTCCTATTTTTCTTAGGCTTCTTCTG  
GGCTTTTTATCACTCAAGCCTCGCACCTACCCCTGACCTAGGAGGTTTCTGACCACC  
CGCAGGCATCACACCTTTAGACCCATTTGAAGTCCCACTTCTTAATACAGCAGTCTT  
ACTTGCCTCTGGCGTAACTGTCACATGGGCACATCACAGTATTATAGAAGGCGAACG  
AAAACAAGCTATCCAATCTCTTGCTCTCACAATTTTACTCGGTGGCTATTTTACCTTC  
CTCCAAGGCCTTGAATATCACGAAGCCCCCTTACCATTGCAGATGGAGTTTATGGT  
GCCACATTCTTTGTTGCTACCGGCTTCCACGGACTTCACGTCTTAGTGGGCTCCTCTT  
TCTTAGCCGTTTGTTTATTACGCCAAATTCTACACCATTTTACATCCGACCACCATTT  
TGGCTTCGAGGCAGCCGCGTGATACTGACACTTTGTAGACGTCGTCTGACTCTTCCT  
CTATATCTCTATTTACTGATGAGGATCTTAATGGCCAATCTCCGTAAATCCCACCCCC  
TTCTTAAAATCGCAAACGATGCTTTAGTAGACCTCCCAGCCCCCGCAAACATCTCTG  
TCTGATGAAACTTCGGGTCTCTTTTAGGACTCTGCTTAGTAACCCAGATCGCTACCG  
GCTTATTCTTAGCCATACACTACACATCAGATATTGCTACTGCCTTTACCTCGGTCTGC  
ACACATCTGCCGGGACGTCAACTACGGCTGACTTATCCGAAGCATTTCATGCCAATGG  
AGCATCATTCTTTTTCATTTGCATCTACCTCCATATTGGCCGTGGTCTCTACTATGGT  
TCTTACCTTTATAAGGAAACATGAACTATTGGTGTGTCCTCCTACTTCTTGTAATGA  
TGACGGCTTTCGTTGGTTACGTACTTCCTTGAGGACAAATGTCCTTTTGAGGTGCAA  
CCGTCATTACCAACCTCCTTTCCGCAGTCCCCTACGTTGGGGGCTCCCTCGTCCAATG  
AATCTGAGGTGGCTTTTCTGTAGATAATGCAACCCTTACCCGATTCTTTGCATTCCAC  
TTCTTTTCCCGTTTCATTATCGCAGCCGCCACAGTAATTCATCTTCTCTTCCTTCACG  
AAACTGGTTCGAACAACCCACCGGTTTAAACTCAAACCTCCGATAAAGTCCCATTTC  
ACCCTTACTTCACGTACAAAGACCTTTTGGCTTTGCAGTCCTTCTTACTGCTCTGGCC  
TCCCTCGCCCTCTTCTCCCCCAACCTTTTAGGAGACCCGGACAACCTTTACCCCTGCAA  
ACCCACTTGTTACACCCCCACATATCAAGCCCGAATGATATTTCTGTGTTGCCTACGC  
CATTCTCCGTTCCATTCCAAACAAACTTGGAGGAGTTCTTGCCCTCTTATTCTCCATC  
CTAGTTCTCATACTTGTCCCCTTTCTCCACACCTCCAAACAACGAAGCCTTATGTTCC  
GCCCTGTAACACAGTTTCTGTTCTGGTCTTTAGTAGCTGACGTAATAATTCTGACTTG  
AATTGGAGGAATACCCGTTGAGCACCTTTTCGTTATCATTGGCCAAGTAGCATCTCT  
TATCTACTTCTCGCTTTTCTAGTCCTTATCCCGACAGCAGGATGAATAGAAAACAA  
AGTCCTCGGATGAAACTATGATTTCAACCCTCATTACGCATATTATTAACCCACTAG  
CCTTTATTGTCCCCGTCTTGTTAGCCGTAGCATTCTGACTCTCCTTGAACGAAAGGT

GCTAGGTTATATACAACCTCCGAAAAGGTCCTAACATCGTTGGACCTTACGGCCTCCT  
TCAACCTATTGCTGACGGCGTAAAACTCTTCATTAAAGAACCCGTTTCGCCCTTCGAC  
CTCCTCACCAGTTTTTATTCCTTTTATCACCCATACTAGCGCTAACGCTAGCCCTTGCA  
CTTTGAGCCCCCATACCTTTTCCATACCCTGTTGTGGACCTCAACCTGGGGATTAT  
TTATTCTAGCCTTGTCTAGCCTCGCAGTGTACTCCATCCTCGGGTCAGGCTGGGCATC  
TAATTCTGAAGTATGCATTAATAGGGGCGCTACGTGCTGTTGCACAAACAATTTCTTA  
CGAGGTCAGCCTCGGACTCATCTTACTTAGCATCATTATCTTTGCAGGAGGGTTTAC  
ACTCCAAACCTTTAACACAGCCCAAGAGGCCATTTGACTCGTAGTGCCCGCCTGACC  
ACTGGCTGCCATATGATACATCTCCACCCTTGCCGAAACAAACCGTGCACCCTTCGA  
CCTGACGGAGGGGGAGTCTGAACTTGTCTCAGGCTTCAACGTAGAGTACGCAGGTG  
GACCCTTCGCTTTATTCTTTTTAGCCGAATATTCAAACATCCTCTTAATAAATACACT  
GTCCGCAACACTATTTTTGGGCGCCTCACACATTCCAAACATCCCAGAATTAACAAG  
CATCAACTTGATAACTAAGGCCGCCCTTCTCTCAGTTGTCTTTCTCTGAGTCCGAGCT  
TCGTACCCGCGGTTCCGTTATGACCAGCTTATACACCTCATTGAAAAAATTTCTTC  
CACTAACGCTGGCGCTGGTTATTTGACACTTAGCGCTCCCTATTGCATTTCGCTGGCCT  
CCCACCTCAGCTGTAGATGAACCCCTACATCTTGACCACCCTTCTATTTGGTTTGGGC  
CTAGGTACAACACTGACATTTGCAAGCTCCCCTGACTTCTCGCGTGAATAGGCCTT  
GAAATTAATACTAGCCATTATTCCACTAATAGCCCAACACCACCACCCTCGGGCG  
GTTGAAGCCACTACTAAGTACTTCTGGCACAAGCCACAGCAGCGGCCACCCTTCTG  
TTTGAAGCACCACCAACGCCTGAATTACCGGACAATGGGATGTTCAACAAATAAC  
ACATCCGCTCCCCACAACAATAGTTGTGATCGCCCTAGCACTAAAAATTGGACTGGC  
TCCGATACACTCCTGGCTCCCCGAAGTTCTTCAGGGCCTAAACCTCACTACGGGTCT  
CATTTTGTGACCTGACAGAAGCTTGACACCTTTTGCTCTTCTACTACAAATTCAAACG  
ACAATCCTACGCCTCTAATCATTATTGGCCTTCTCTCTGCCCTTGTTGGCGGCTGAGG  
CGGTCTCAACCAAACCCAACTGCGCAAAGTTCTTGCCTACTCCTCAATCGCCACCT  
TGGTTGAATAATACTTATCCTTCAATTTTCACCACTCCTCAGCCTCCTTGCACTTCTG  
ACATATTTTCTATAACCTTTTCAGCTTTCTCATCTTCAAAGTAAACAAGGCCACTAC  
TGTTAATGCACTCGCCATCTCTTGGGCAAAAACCTCCTGCCCTTACAGCCCTAGCACC  
CCTTGTTTTACTCTCCCTTGGGGGCCTTCCCCCACTTACGGGCTTTATACCAAAGTGG  
TTTATTCTTCAGGAACCTTACCAAACAAGATTTACCACACTAGCTACTCTCGCTGCACT  
AACTGCCCTCTTGAGCCTCTACTTCTACCTACGTCTCTCGTATGCTATGACCCTAACC  
ATATTTCCCAATAACCTCATTGGCATGACCCCCTGACGATTCTCAACTCCCCAGTTTA  
CTCTTCCCCTCGCCGTTTCCACTGCGGCAACCACCCTCCTCCTGCCATTGGCACCTGC  
TGCCGTAGCACTCCTCGTCACCTATGAGCCTTCTTCTAACCATCATTTCATTACCGC  
CCTCCTATCAACGGTACTTGCCATTGTGTCTTTTTGACTTCCCCAAATTACGCCGGAC  
TATGAAAACTGTACCATACGAGTGTGGCTTTGACCCCATTTGGTTCCGCCCCGACTA  
CCCTTCTCGATGCGATTTTTTCTCATCGCCATCCTTTTTCTTCTGTTGACTTAGAAAT  
TGCACTTCTCCTCCCCCTCCCGTGAGGCGACCAACTAGCATCCCCTCTACTTACATTT  
ACCTGAGCTGCAGCAGTTCTATCGCTCCTAACCCTCGGCCTCATCTACGAATGAGTA  
CAAGGAGGCCTAGAATGGGCTGAATATGCTAAAAATTCTAATTCCAACACTTATGCT  
AATCCCAACAGCCTGACTACTTAAACCTAGCTGGCTCTGGCCCATAAGCTTATTGTA  
TAGCTTTTGCATCTCCTTAATCAGCCTCTCGTGACTAAAAAACCTCTCGGAAACCGG  
CTGATCCTCACTCAACCTATTTATAGCCACCGACTCTTTATCAACCCCCCTCCTCGTC  
CTGACATGTTGGCTACTTCCGCTAATAATCTTAGCAAGCCAGAAACATACTGCCTCA  
GAGCCACTCAGTCGGCAGCGCATGTATATCTCGCTTCTCGCCTCCTTCAATTTTTCT  
GATTCTAGCATTTAGCGCCACAGAAGTGGTAATGTTTTACGTAATATTTGAAGCTAC  
CCTTATCCCGACGCTGATCATTATCACTCGCTGAGGAAACCAAACAGAGCGCCTAAA  
TGCGGGAACCTACTTCCTGTTCTATACCCTGGCTGGCTCACTTCCTCTTCTTGTGCC  
TTGCTCCTACTCCAAAACACGTCCGGAACCTCTTTCATTGTTAACGCTCCACTACACG  
GACCCGCTCGCTGTCATCCTATGCGGACAAATTATGATGGGCGGATGTCTTCTAGC  
TTTCCTAGTTAAATGCCACTTTATGGCGTTCACCTCTGACTCCCCAAAGCACATGTT  
GAAGCCCCAATTGCAGGCTCAATGATCCTTGCAGCGGTTTTACTTAAGCTAGGAGGC

TATGGCATAATCCGTATAATAACAATACTAGAGCCTCTAACCAAAGAGTTAAGCTAC  
CCCTTTATTATCTTTGCACTCTGAGGCGTAATCATGACTGGCTCAATTTGCCTACGAC  
AAACGGATCTTAAGTCATTAATTGCCTACTCCTCTGTTAGTCACATGGGTCTCGTAG  
CAGGAGGAATTCTCATCCAATCGCCCTGAGGACTCACGGGTGCACTCACACTTATAA  
TCGCCCACGGTCTTACCTCCTCAGCCCTATTTTGCCTGGCAAATACAAACTATGAGC  
GAACACACAGCCGCACAATAGTATTAGCACGAGGACTCCAAGTGGCTTTACCCCTA  
ATAGCCACTTGATGATTTGTTTCCAGCCTAGCTAACCTGGCCCTGCCACCACTACCC  
AACCTTATGGGGGAGCTGATAATTATCACCTCCCTTTTTGACTGGTCCTGATGAACA  
CTAGCACTTACAGGGTCCGGGACTCTTATTACCGCTGGCTACAGCCTCTATATATTCT  
TAATGACTCAACGAGGCCCTCTCCCAACACATGTAATTGCACTTGAACCCCTCACACA  
CCCGAGAACATCTTCTTATTGCCTTCACCTCATCCCTCTTGTTCTCCTCGTTCTTAAGC  
CCGAGCTGATCTGAGGCTGAACTGCCTATGACCCCCACACACTTTGCCTTCTCCTCA  
GCCTTTTTTCTAGGTTTAAACAGGCCTGGCATTCCACCGGTCCCACCTCCTTTCCGCAT  
TATTGTGCCTTGAAGGAATGATACTGTCCCTTTTTGTTGGCCTCTCCCTGTGAACTCT  
ACAAC TAGACTCAACTAACTTTTCAGCATCTCCATTACTCCTGCTTGCATTTTCAGCC  
TGTGAAGCAAGCGCCGGGCTCGCCCTTCTAGTAGCCACTGCCCCGAACCCACGGAAC  
TGACCGACTGCAAAGCCTAAACCTCCTCCAATGCTAAATGCACCCACCTCCCTAAT  
GATCTCATCAAGCTTGATTACAATCTTTGCATTACTAGCCTACCCACTGGCCACCAC  
ATTCCGTCCTGCGCCTCAGGGACCTCAATGAGCCACATCTCATGTCAAGACAGCTGT  
AAAAATAGCTTTCTTTGTCAGCCTCTTACCCCTTGCCCTGTTCTTAATGAAGGTGCC  
GAGACAATTGTTACTAACTGGGCCTGAATGAACACTAACACCTTTAACATCAACATT  
AGCCTAAAATTCGACTTTTACTCGATTATCTTCACTCCTATTGCCCTTTACGTTACTT  
GGTCCATTCTAGAATTCGCATCATGGTACATACACGCTGACCCACACGTAAACCGCT  
TTTTCAAGTACCTTCTAACGTTTCTTATTGCTATAATTATCCTAGTAACTGCAAACAA  
CATGTTTCAACTCTTTATCGGGTGAGAGGGCGTAGGGATCATATCGTTCCTCCTCATT  
GGGTGGTGGTACGGACGGGCAGATGCTAATACTGCAGCACTTCAAGCAGTACTATA  
CAACCGGGTCGGAGACATCGGACTTATTTTCGCCATAGCTTGAATAGCAACAAACCT  
GAACTCCTGAGAAATACAACAAATCTTTGCGACCTCTAAGGATATGGACTTAACCTA  
CCCCCTCATTGGACTAATCATCGCAGCAACCGGGAAATCAGCTCAATTCGGGCTCCA  
CCCTTGCTGCCCTCAGCCATGGAAGGTCCTACACCGGTATCTGCCCTACTTCATTCT  
AGCACTATAGTCGTGGCCGGCATCTTTCTCCTGGTACGAATAAGCCCACTTCTGGAG  
AATAACCCGGTTGCCCTCACAACCTGCCTCTGTCTCGGGGCCCTTACGACCCTGTTC  
ACTGCAACCTGCGCCCTCACACAAAATGACATTAATAAAAAATCGTCGCATTTTCTACA  
TCTAGTCAGCTCGGGCTCATGATGGTAACCAATTGGTTTAAACCAACCTCAACTAGCA  
TTTCTACACATCTGTACACACGCCTTCTTTAAAGCCATACTATTTCTTTGTTTCGGGGT  
CTATTATTCATAGCCTAAACGATGAGCAGGACATCCGAAAAATAGGGGGTATACAC  
CACCTTGACCTTTTACATCCTCTTGCTTGACAATTGGAAGCCTCGCACTTACGGGCA  
CCCCATTCTTAGCTGGTTTCTTCTCTAAAGATGCCATCATCGAAGCATTAAACACATC  
CCATTTAAACGCCTGAGCCCTAACCCTAACCCTCCTGGCCACATCTTTTACAGCAAT  
CTACAGCTTCCGGGTAATTTTCTTTGTGCCTATGGGCCACCCCGATTTAATCCATTT  
CCCCCATTAACGAAAACAACCCCGCAGTAATTAACCCGCTTAAACGCCTAGCATGG  
GGAAGTATCCTTGCAGGACTACTAATTACCTCTAATATTACACCCCTTAAGACCCCC  
GTGATGTCTATGCCTCCCCTCCTAAAACTAGCTGCCCTTGCAGTTACAATTGTCGGCC  
TACTTATTGCCATAGAACTCGCCATATTAATAACAAGCAATTTAAATCGACACCTG  
TCTTAACGTACACAACCTTCTCTAATATGTTGGGCTTTTTCCCCGCCATTGTACACCGC  
CTAACCCCTAAATTAGGGCTCGTTCTTGCCCAAGACATTGCTAACCAGATAGTAGAT  
CAAACCTGACTAGAGAAAGTAGGCCCCAAAGCCATTGTATCCTTCAACCAACCATT  
AGTCTCTACAACAAGTAATATTCAACGAGGAATAATCAAGACCTATTTACCCCTTTTC  
CTTTTAACACTAGCCCTTATTGTGCAATGACCCTCGCACAAATGGCTTTTGTTATATA  
TTTTGTTTTATTTTTCTTCGTGCTGGGGTTAGTTGCAGTTGCTTCTAACCCGTCGCCCT  
ATTATGCTGCTTACGGCTTAGTTGTGGTAGCCGGGATGGGGTGTAAGTGTGTTAATTG  
GGCATGGGGCGCCCTTTTTATCTATAATTCTTTTCCTAATTTACTTGGGGGGAATGCT

AGTTGTATTTGCATTTGCAGTAGCAATAGCTTCTGAGCCGCACCCAGTCGGCTGGAA  
TTCTTGGGCTGTATTGGGTTACGCTTGTTTACATGGCAGCGGTAGTGTAGTTGCTGG  
GGTGCTTTGAGGGGGATGATATGAATCGTCTTGAGCTACAGTAGATGGTTTTGTGGA  
GACGGGGGTGTTTCGGGGTGACCTGGGTGGGGTGGCCATGATTTATGGTTCCGGGG  
GAGGGCTGTTAGTTATCAGTGCGGGGGTATTGCTTTTAACGCTGCTTGTAGTCCTTG  
AGTTAGCCCGGCCCATGTGCCGAGGGTCATTGCGACAATAA

*Paralichthys\_olivaceus\_AB028664*

ATGATACTAAGCTTCTTTGATCAATTTATATCCCCCGTATACCTGGGTATTCCCCTTA  
TTGCACTTGCAATTATCTTACCATGAGCATTATTCCCACCCCCTCTAGTCGATGAATA  
AACAACCGACTGCTCACACTCCAAGGCTGATTTATTAACCGTTTTACCTCCCAACTC  
CTTCTTCCACTAAACCTCGGGGGCCACAAATGAGCGACCCTGTTTGCATCACTCATA  
TCTTCTTTTTCTATTAACATGCTTGGACTTCTCCCCTACACCTTTACACCCACAACCC  
AGCTCTCATTAATATGGGCCTCGCAGTCCCACTCTGACTCGCCACTGTCATTATGG  
TATACGAAACCAACCCACACATGCATTAGGCCATCTATTGCCAGAAGGCACCCCTAC  
AGCCCTGATCCCAGTTTTAATTATCATTGAAACAATTAGTCTGTTCAATTCGCCCTCTT  
GCCCTTGGTGTCCGACTCACAGCAAACCTGACGGCAGGTCACCTCCTAATTCAACTT  
ATCGCTACAGCCGCCTTTGTTCTCCTCCCCATCATACCTATAATCGCGATTTCAACAG  
CAACCCCTCCTCTTCCTTCTTACACTCCTAGAGGTTGCAGTCGCAATAATTCAGGCCTA  
TGTATTTGTCTACTCTTAAGCCTCTACCTACAAGAAAACGTCTAATGCCCCAGCTTA  
ACCCCGCACCTTGGTTTATAATCCTAGTTTTTTCTTGAATAGTGTTTTTGACAATTAT  
TCCCCCAAAGTCTTAGCCCATACCTTCCCCAATGAACCCACCCCAAAAGCACACA  
AAAACAAAACAGAATCCTGAAACTGACCATGATACTAAGTGGCAATCACACGTTGA  
TTTTTCTCGACCAATCACAAAGACATCGGCACCCCTCTATCTCGTATTTGGTGCCTGAG  
CCGGAATAGTGGGGACAGCCCTAAGCCTCCTCATTCGGGCAGAACTCAGCCAACCT  
GGTGCTCTCCTAGGGGACGACCAGATTTATAACGTAATCGTTACCGCACACGCCTTT  
GTAATAATCTTTTTCATAGTTATACCAATTATGATTGGAGGCTTTGGCAACTGACTTA  
TCCCCCTGATAATCGGTGCCCCAGACATAGCATTCCCTCGAATAAATAATATAAGCT  
TCTGACTTCTACCCCTTCATTCCCTTCTTCTCCTGGCTTCTTCAGGTGTCTGAAGCTGGT  
GCCGGTACCGGGTGGACTGTCTACCCTCCCCTAGCTAGCAACCTCGCCCATGCTGGA  
GCCTCAGTAGATCTAACCATCTTTTCACTACACCTTGCAGGTATTTTCATCAATTCTGG  
GAGCTATCAACTTCATTACTACCATTATTAACATGAAACCCACAACCTGTCACAATAT  
ACCAAATTCCCCTGTTTGTCTGAGCCGTCCTAATTACGGCTGTCCTGCTGCTCCTCTC  
GCTGCCAGTTTTAGCCGCCGGTATTACAATACTGCTTACAGACCGAAACCTTAATAC  
AACATTCTTTGACCCTGCAGGAGGAGGGGATCCAATCCTCTACCAACACCTGTTTTG  
ATTCTTTGGCCACCCTGAAGTATATATTTTGATCCTCCCAGGCTTCGGTATGATTTTCG  
CACATTGTTGCATACTACTCAGGGAAGAAAGAACCCTTCGGCTACATGGGTATGGTC  
TGAGCTATGATGGCTATCGGCCTTTTAGGTTTTATTGTGTGAGCCCACCATATGTTCA  
CAGTCGGTATGGACGTAGACACACGAGCTTACTTTACATCAGCAACAATAATTATTG  
CGATCCCAACAGGTGTAAAAGTTTTTAGCTGATTAGCCACCCTTCACGGAGGGAACA  
TTAAATGAGAAACACCACTACTATGAGCCCTCGGGTTCATCTTCCTTTTCACAGTAG  
GGGGCTGACCGGGATCGTACTAGCCAACTCCTCCCTAGACATCGTTCTTCATGACA  
CATACTATGTAGTAGCCCACTTCCACTACGTCCTTTTCGATGGGGGGCCGTCTTTGCCAT  
CGTTGCTGCTTTTCGTCCACTGATTCCCGCTATTTACAGGCTACACACTTCACTCAACA  
TGAACAAAAGTTCACTTCGGCGTAATATTTATTGGAGTAACTTAACATTCTTCCCC  
CAACATTTCTAGGTCTAGCCGGAATGCCCCGACGCTACTCTGACTACCCCGATGCC  
TATGCTCTCTGAAATACGGTCTCCTCAATTGGATCTCTAATGTCTCTCGTCGCTGTAA  
TTATGTTCTTATTCAATTATTTGAGAAGCATTCTCAGCTAAACGAGAAGTCCTATCAGT  
CCTTATAACCGCAACAAACGTTGAGTGACTCCACGGCTGCCCTCCCCCTACCACAC  
ATTCGAGGAACCTGCATTTCGTTTCGAGCCCCATTAACTAGATGGCCCATCCCTCACA  
ACTCGGATTTCAAGACGCAGCTTCACCCCTAATAGAAGAACTACTTCACTTCCACGA  
TCACGCCTTAATAATTGTAATCCTCATCAGTACAATGGTACTTTATATTATTGTTGCC  
ATAGTCACAGCGAACTTACGGACAACTTGTTCTAGACTCCCAAGAAATTGAAAT

CATCTGAACAGTTCTCCCAGCTATCATTCTTATTCTTATTGCCCTCCCATCCCTTCGA  
ATCTTGTACCTAATGGATGAAATCAACGACCCCCACCTCACAATCAAAGCCATAGGC  
CATCAGTGGTACTGAAGCTATGAATACACAGATTATGAGGACCTCGGCTTCGACTCA  
TATATAACCCCTACACAAGACCTTACACCCGGGCAATTTTCGGCTCCTTGAAGCCGAT  
CATCGGATAGTGACCCCCGTTGAGTCCCCCATCCGAGTGCTTATTTCCGCTGAAGAC  
GTATTACACTCTTGAGCAATCCCCGCTTTAGGTGTAAAAGTAGATGCTGTACCCGGC  
CGACTAAATCAAACAACCTTTTATTATTAGCCGCCCAGGTGTGTTCTTCGGACAATGC  
TCTGAAATCTGCGGGGCTAATCACAGCTTCATACCAATCGTTGTAGAAGCAGTCCCC  
CTTCAGCACTTCGAAAACCTGGTCTTCGTTAATAATTGAAGAAGCCTATGGCCCATCA  
AGCACACCCCTTACCATATAGTTGACCCCAGCCCATGACCCCTCACGGGAGCTATCGC  
TGCACCTTCTAATAACCTCCGGCCTTGCTATTTGATTCCACTTCCACTCTACAACCCTA  
ATAACACTTGGCACAATTCTTCTTATTTTAACCATCTTTCAGTGATGACGCGATGTCG  
TTCGAGAAGCCACATTCCAAGGCCATCACACCCACCCGTACAAAAGGGTTTACGA  
TACGGGATAATCCTGTTCATTACCTCGGAAGTCTCTTCTTTTTAGGGTTCCTTCTGGG  
CATTCTATCATGCAAGCCTAGCCCCCTACCCCTGAGTTGGGTGGTTTCTGACCACCAG  
CAGGCATCACTCCTCTTGACCCATTTGAAGTCCCTTTACTTAATACAGCTGTTCTTCT  
TGCTTCCGGTGTAACAGTAACCTGAGCACATCACAGCATCATGGAGGGTAAACGGA  
AACAAAGCCATTCACTCCCTTTTCCTCACAAATCCTTCTTGGGGGCTACTTTACGTTCT  
CCAAGCACTTGAATACCACGAAGCCCCCTTCACTATTGCAGATGGGGTTTATGGCGC  
CACATTCTTCGTTGCCACTGGTTTCCACGGACTTCATGTTCTAATCGGCTCGACGTT  
TTGGCCGTCTGCCTCCTACGTCAGATTCTCCACCACTTTACGGCCAATCACCATTTTG  
GGTTCGAAGCAGCCGCATGATACTGACACTTCGTAGACGTTGTATGACTGTTCTTT  
ATATCTCTATCTACTGATGAGGATCTTAATGGCCAGCCTACGAAAATCACACCCCT  
TTTAAAAATCGCAAATGATGCATTAGTCGATTTACCAGCCCCCTCTAATATCTCTGTC  
TGATGAAACTTTGGGTCCCTCTTAGGACTATGTTTAATCACCCAGATTTTAACCGGC  
CTATTCTTAGCCATACACTACACCTCAGACATCGCAACTGCCTTCACTTCCGTGGCCC  
ACATCTGCCGGGACGTAAACTACGGTTGATTAATCCGAAACATCCACGCTAACGGC  
GCATCATTCTTCTTTATCTGCATTTACCTCCACATCGGCCGAGGTCTATACTACGGCT  
CTTTTCTGTATAAAGAAACATGAAATGTTGGCGTCATCCTGCTGCTTCTCGTAATGAT  
GACCGCCTTTGTTGGTTACGTCCTTCCCTGAGGACAAATATCATTCTGGGGTGCCAC  
TGTCATCACCAACCTACTCTCAGCCGTACCTTATGTCGGTAACACCCTAGTACAATG  
GATCTGAGGCGGATTTTCTGTAGATAATGCCACACTCACCCGGTTCTTTGCATTCCA  
CTTCCTATTCCCATTTGTCATCGCAGCCGCAACCGTAATCCACCTTATTTTCCTACAC  
GAAACTGGCTCCAACAACCCCACTGGATTGAATTCAGACTCAGACAAAGTCCCCCTC  
CACCCATACTTCTCATATAAAGACCTCCTGGATTTGCAGCCCTCCTCATTGCCCTAGC  
TGCCCTCGCTTTATTCTCCCCAAACCTTCTGGGCGACCCAGATAATTTACCCCCGCA  
AACCCACTTGTTACACCGCCCCATATCAAGCCCGAGTGATATTTCTCTTTGCATAC  
GCCATTCTCCGATCTATTCCAAATAAACTTGGCGGAGTACTCGCCCTGTTGTTCTCTA  
TTTTAATCCTCATGCTTGTCCCCATCCTCCACACATCAAAACAACGAAGTCTAATATT  
CCGACCCTTTTCGCAATTCCTATTTTGATCCCTCGTAGCAGACGTAATAATTCTCACA  
TGAATCGGGGGAATGCCCGTAGAACACCCTTTTGTTATTATTGGACAAGTTGCTTCA  
TTCCTCTACTTCTTCTTTTCTTAGTCATAATTCCAGTAACAGGCTGACTAGAAAATA  
AGATTCTCGGATGACAGTATGATTTCAACACTCATCACCCATATTATCAACCCATTG  
GCCCTAATCGTACCCGTTCTACTAGCAGTTGCATTCCCTCACCTTACTTGAACGGAAA  
GTGCTCGGTTACATGCAACTCCGAAAAGGCCCAATATCGTCGGACCTTATGGCCTT  
CTCCAACCTATCGCTGATGGTATTAACTTTTTATCAAAGAACCTGTTTCGACCTTCCA  
CCGCATCCCCAGTCCTTTTTCTTTTAGCACCTATGCTCGCTCTCACTCTTGCTCTTACA  
CTATGAGCCCCTATGCCTCTTCCATACTCCACAGTTGACCTTAACTTGGGGATCTTAT  
TTGTCCTCGCACTGTCAAGCCTTGCAGTTTACTCTATCCTCGGCTCAGGTTGAGCATC  
AAATTCAAATATGCCCTCGTTGGGGCACTCCGAGCCGTAGCACAGACCATCTCTTA  
TGAAGTCAGCCTAGGACTTATTTTACTTAATATCATCATCCTCACAGGGGGTTTCACT  
CTTCAGACCTTTAACACAGCCCAAGAGGCTGTCTGACTAGTTTTTGCCAGCATGACCT

CTAGCTGCAATATGGTATATTTCCACACTCGCCGAAACAAACCGGGCACCCTTCGAT  
CTCACC GAAGGAGAGTCCGAAC TCGTCTCAGGCTTCAACGTCGAGTATGCAGGAGG  
ACCCTTCGCCTTATTCTTCCTAGCCGAATACTCCAACATCCTCTTGATAAATACCTTA  
TCGCTGTCTTATTCTGGGGCGCTCACACATTCCC ACTATCGCGACCCTGACGGCTA  
TTAATCTAATAACCAAGGCGGCACTTCTTTCAGTTGTTTTCTTTGGGTGCGGGCCTC  
TTACCCCCGGTTTCGATACGACCAGCTAATACACCTGATCTGGAAAAACTTTCTCCC  
CCTCACCTAGCGCTGATTATTTGACACTTGGCACTTCCC ACTGC ACTTGCTGGACTT  
CCACCGCAACTGTAAATGAATCCTTTTATCCTAACCACCCTTCTCCTTGGTCTAGGTC  
TCGGAAC TACAATTACATTTGCGAGTTCACACTGACTCTTAGCCTGAATGGGCCTAG  
AAATCAACACACTAGCCATTATCCC ACTCATAGCGCAACATCACCACCCTCGAGCGG  
TTGAGGCTACTACTAAATACTTTTTTAACACAAGCAACAGCCGCCGCCACACTCCTGT  
TTGCAAGCATAACAAACGCCTGGCTCACAGGCCAGTGGGACATCCAACAAATGACA  
CACCCCCTCGCCACAACCATAATTATTATTGCCCTGGCATTGAAAATTGGTCTAGCA  
CCAATACACTCCTGACTCCCCGAAGTTCTTCAAGGTTTGACCTAACAACCGGCCTC  
ATCCTTTCAACTTGACAAAAGCTTGCCCCCTTTGCACTACTTATACAAATCCA ACTG  
ACAACCCCAACCCCTTAATTATTTTAGGCCTCACATCTACCCTCGTGGGTGGGTGAG  
GCGGCCTCAACCAAACGCAGCTCCGTAAAATCCTTGCCATTTCATCAATCGCCCACC  
TCGGCTGAATAATACTTATCCTTCAGTTCTCACCCCTCCTCACCCCTTCTTGCTCTCAT  
CACCTACCTCTTATAACATCCTCAGTATTCTTAATCTTCAAAAATAAACAAAGCCACA  
ACCATTAATGCCCTCGCAATCTCCTGAACAAAAACGCCTATCCTAACAGCTCTTATC  
CCACTAGTCTTACTCTCCCTAGGGGGCCTTCCCCCTCTAACCGGGTTCATACCTAAAT  
GGTTTATCCTCCAAGAACTAACAAAGCAAGACCTGCCACCCTCGCCACTCTAGCAGC  
CCTTACTGCCCTCCTCAGCTTATACTTCTATCTACGACTCTCGTACGCGATAACACTC  
ACAATAGCCCCAAACAACCTCACCGGCACCACTCCGTGGCGATTCTCCTCCCCCTCAA  
CTAACCCCTTCCGCTCGCAATCTCAAGCACAACCGCCACCCTACTACTCCCGCTAGCT  
CCTGCCACCCTAGCGCTCTTAACAACCTATGAGCCTTCTTATGACAATTATTACAATC  
ACTGCCCTGCTTTCTACAATTCTTGCCATTGTATCCTTCTGACTGCCGCAGATTTACAC  
CAGACCACGAAAAGCTTTCACCATATGAATGCGGCTTCGACCCCATGGGCTCTGCTC  
GACTTCCCTTCTCACTACGATTTTTCTCATCGCCATCCTCTTCTCCTCTTCGATCTA  
GAAATTGCACTCCTTCTTCCACTTCCTTGAGGAGATCAGCTACCTACGCCCTTGCTGA  
CATTCACCTGAGCCACAGCAGTCCTTTTTCTTCTCACCTTGGGTCTTATCTATGAATG  
AATTCAAGGAGGCCTAGAGTGGGCTGAATATGCTAAAAATCTTAATTCCAACACTTA  
TACTTATCCCAACAGCCTGGCTGGTCAAACCAA ACTGACTCTGACCAACTACCTTAA  
CTCATAGTTTCTGCATCTCCCTAGCTAGTCTCTCATGACTTAAGAACCTTTCAGAAAC  
TGGCTGATCTTCACTAAACCTCTGTATAGCAACAGATGCCCTATCAACACCCTTCTT  
GTCCTCACATGCTGATTACTCCCCCTGATAATTTTGGCAAGTCAAACACACAGGCC  
TCAGAACCCATCAACCGCCAGCGCATGTATATTACCCTCCTTACCTCCTTCAATTCTT  
CTTAATCCTCGCATTCGGCGCAACCGAAATTATCATGTTTTACGTGATGTTCTGAAGC  
CACTCTTATCCCCACGCTCATTATTATCACACGCTGAGGTAACCAAACAGAACGTCT  
TAACGCAGGTACCTACTTCCTATTCTACACCCTGGCAGGGTCACTCCCCCTGCTCGTC  
GCCCTACTATTGCTTCAAAATTCGCGCGGGACCCTCTCACTCCTCACCCCTCCATTACA  
CCGACCCACTCAATAACATCCTATGGAGACAAACTTTGATGAGCGGGCTGCCTCCTG  
GCCTTCCTAGTTAAAATACCTCTCTATGGTGTCCATTTATGACTTCCCAAGGCACACG  
TCGAAGCCCCCATTGCAGGCTCAATAATTCTTGACGCTGTCCTTCTTAAGCTTGGCG  
GTTACGGCATAATCCGAATGATAACAATGCTAGAGCCACTAACTAAGGA ACTAAGC  
TACCCTTCATCATCTTCGCACTCTGAGGTGTAGTAATAACTGGCTCGATTTGTCTAC  
GACAAACTGACCTTAAATCCCTAATTGCCTACTCATCCGTCAGCCACATAGGCCTGG  
TAGCTGGGGGGGTTCTAATCCAATCACCCCTGAGGCCTCACAGGGTCCCTAATCCTGA  
TAATCGCCACAGGTCTAACCTCCTCAGCTCTCTTTTGT TTGGCTAACACAAACTACGA  
GCGAACACACAGCCGGACCATGGTACTGGCACGAGGACTTCAAATGGCCCTCCCCC  
TTATGGCAACCTGGTGATTTATTGCCAGCTTAGCCAACCTAGCACTTCCACCTCTTCC  
TAACCTTATGGGTGA ACTTATAATTATTATCTCCCTATT TAACTGATCCTGATGAACC

CTGGCACTCACAGGAACCGGCACCCTGATCACAGCTGGCTATTCACTCTATATATTC  
CTTATAACCCAACGAGGCCCGCTCCCAACACACATTCTTGCCTCGAACCATCTCAC  
ACCCGAGAACACCTGCTCATTGCCTTCACCTACTCCCTCTCATTCTCCTAGTGCTTAA  
ACCCGAGCTAATTTGAGGCTGAACAGCCTATGACCCCCACACATTTTGCATTTTCTT  
CTGCCTTTCTTCTTGGCCTGACAGGCCTTGCATTTACCGATTTACCTCCTCTCCGC  
CCTACTATGCTTGGAGGGTATAATACTGTCCCTGTTTATTGCCCTCTCCCTTTGGACA  
CTTCAACTAGACTCAACCAACTTCTCAGCTTCCCCAATACTTCTCCTAGCATTTTTCGG  
CCTGTGAAGCAAGTGCAGGTCTGGCCCTCCTAGTAGCTACCGCTCGAACACATGGTA  
CCGACCGACTTCAAAGCCTGAACTTACTACAATGCTAAATGTCTCCAAACATGTTGA  
TTATGTCCTCCAGTCTCGCCATCGTGTTTACACTCCTCACTTTCCCGCTAGCCACATC  
TCTCCTTCTTCTCCTCGAAACTCCAATGGGCCAACTCACACGTGACAATAGCTGT  
AAAAATAGCTTTCTTTGTAAGCCTCCTCCCGTTAGCTCTCTACCTCCACGAAGGCTCA  
GAAACAATCATTACTATCTGAACCTGAATAAATACTAACTCATTTAGCATTAATATC  
GGCCTAAACTTGACTTCTACTCAATCATCTTCGTCCCCATTGCCCTTTACGTAACCT  
GGTCAATTCTAGAATTTGCCTCTTGATACATGCACGCAGACCCACAAATAAACCGTT  
TTTTTAAATACTTACTAACATTTCTCATCGCGATAATTATTCTAGTCACCGCAAACAA  
CATGTTTCAACTATTCATCGGCTGAGAAGGTGTCGGTATTATATCCTTCTTCTTATC  
GGCTGATGGTATGGCCGAGCAGATGCTAACGCCGCGGCACTGCAAGCCGTAATCTA  
CAACCGGGTTGGAGATATCGGCCTTATCTTCGCCATAGCATGAATAGCACTCAACCT  
AAACTCCTGGGACTTAGAACAATACTTTGCAGCCTCTAAGAACATAGACCTATCTTT  
CCCCTTCTAGGCCTTATCGTCGCAGCAACTGGTAAATCAGCCCAGTTTGGACTTCA  
CCCCTGACTACCCGCCGCAATAGAAGGCCCGACACCGGTATCCGCCCTACTTCACTC  
AAGCACGATAGTTGTGCGCAGGAATTTTCTACTAGTCCGAATGAGCCCGCTCCTGGA  
AAACAACCCCATAGCCCTTACAACCTGTCTATGCCTCGGAGCCCTCACAAACATTATT  
TACCGCAACTTGTGCTCTTACCCAGAACGATATCAAGAAGATTATTGCATTCTCCAC  
ATCTAGCCAATTAGGACTAATAATAGTTACTATTGGACTAAACCAACCACAACCTTGC  
ATTCTCCACATCTGCACACACGCCTTCTTCAAAGCCATGCTATTCTTATGCTCTGGG  
TCTATTATTCACAGCCTAAACGACGAACAAGACATCCGGAAAATAGGGGGAATACA  
TCACCTCACCCCTTCACATCTTCTTGCTTAACTATTGGCAGCCTCGCCCTCACGGGA  
ACCCCTTTCTAGCCGGCTTCTTCTCAAAGATGCAATTATTGAAGCAATAAACACA  
TCCCACCTAAACGCCTGAGCCCTCGCTCTCACCCCTCCTAGCCACGTCTTTTACAGCA  
GCTTACAGCTTTTCTGACTGGTATTCTACGTCTCGATGGGTCAACCCCGATTCAACCCA  
TCACCCCTATTAATGAAAACAACCCAGCACTTATTAACCCAATCAAGCGACTCGCCT  
GAGGAAGCATTATTGCAGGACTCCTCATTTTCTCCAACATCTCCCCATTAAAAACCC  
CGGTTATAAGCATACCTCCAGCCCTCAAACCTAGCTGCCCTTGCAGTCACAATCTCAG  
GCCTTCTCGTCGCTATAGCAATTGTGCAATTGTAAACAAGCCATCTCAACCAGCAC  
CCATCGCAACCCCCACCACTTCTCCCTAATACTAGGCTTTTACCCCCACATTCTACAC  
CGCCTAGCCCCAAACTCGGCCTACTCCTAGGTCAGTCTATTGCCAGCCAAATAGTC  
GACCAAACCTGACTAGAGAAGACAGGACCCAAAGCAATCTCATCATCCAATATCCC  
CCTGGCCTCCGCCACAAGCAACATTCAAAGGGGAATGATCAAACATTCTCCTTTT  
TTCGTCTCTCTCTTGGCCCTAATAATTCTTATTTTTACTATTTAATGACTTTTGTGATA  
TGCTAGTATTGTTTTGCCTTGTTTTAGGGTTAGTAGCGGTTGCTTCGAACCCATCAC  
CTTATTTTGTGCTTTAGGGCTGGTTGTTGTTGCTGGTATGGGGTGTGGGGTACTGAT  
CGGTCATGGTGGGCCCTTTCTGTGCTTAGTACTATTTTAAATTTACTTGGGGGGGATG  
TTGGTTGTGTTTGCCTATTTCGGCGGCGTTGGCTGCTGAACCTTACCCAGAACTTGG  
GGGAGTCGGCCAGTAATAGTTTACAGTGCTTTACATGGTGGGGGTGGTGTAGTCTCT  
GTATTGTTCTGAGGGGGGTGATATGAGTCTTCATGGGTGTTAGTGGATGAGTTGGGT  
GAGTTTTCGGTGTTCGGGGGTGATATTGGAGGAGTTGCTTTAATACTCGTCAGGG  
GGTTGAATGTTGCTTATTAGTGCGTGGGTACTTTTATTGACACTATTTGTGGTGCTCG  
AGTTGACCGTGGGATGAGTCGAGGGGCGCTTCGGCAGTTT

*Platichthys stellatus*\_Ps2011

ATGATACTAAGCTTCTTTGACCAATTTATGTCCCCCGTATTCTGGGTATCCCACTAA

TTGCACTCGCAATTACCCTGCCCTGAACGCTCTTCCCAACCCCTGTGTCCGCTGATTA  
AACAACCGCCTAATTTCACTTCAAGGGTGATTTATTAGCGGTTTTACCTCACAACCTC  
TCCTCCCCCTAAACCCTGGAGGACACAAATGAGCGCTTCTATTTGCCTCACTAATCT  
TTCCTTTCTCTATTAACATGCTTGGGCTTCTTCCATACACCTTCACACCTACAACCTCA  
GCTCTCACTTAACCTCGGCCTCGCAGTCCCACTCTGGCTGGCAACCGTCATTATGGT  
ATGCGAAACCAACCAACAGTTGCTTTAGGTCACCTCCTCCCCGAAGGGACTCCCACC  
CTCCTGATTCCCGTACTAATTATCATCGAGACAATTAGCCTATTTATTTCGACCTCTCG  
CTCTTGGTGTTCGACTTACAGCGAACCTCACAGCAGGCCACCTGCTTATCCAACCTCA  
TTGCAACAGCTGCCTTTGTTCTTCTTCCCCTTATACCCGTTGTTGCTATTTTAACAAC  
AACAGTTCTTTTTCTCCTCACCCTGCTAGAAGTAGCCGTTGCTATAATTCAAGCCTAC  
GTCTTTGTACTACTCCTAAGTCTCTACCTACAAGAAAACGTTTAATGCCTCAACTGA  
ACCCCGCACCCCTGATTTGCAATTTTGGTTTTCTCTTGAATAATCCTATTAACCTATCAT  
TCCCCCAAAGTCTTAGCTCATACCTACCCTAATGAGCCAACCTCCCAAAGCACACA  
AAAACAAAACAGAACCCTGAAACTGACCATGATACTAAGTGGAATCACACGTTGA  
TTTTTCTCGACCAATCACAAAGACATCGGCACCCTCTATCTCGTATTTGGTGCCTGAG  
CCGGAATAGTGGGGACAGGCCTAAGTCTACTCATTTCGAGCAGAGCTAAGCCAACCT  
GGGGCTCTCCTGGGGGACGACCAAATTTATAACGTAATCGTCACCGCACACGCCTTT  
GTAATAATTTTCTTTATAGTAATACCAATTATGATTGGAGGGTTTGGAACCTGACTT  
ATCCCATTAATAATTGGGGCCCCCGATATGGCCTTCCCTCGAATAAATAACATGAGC  
TTCTGACTCCTACCCCCATCCTTCCTGCTTCTCCTGGCCTCTTCAGGTGTTGAAGCCG  
GGGCGGGAACAGGGTGAACGTATATCCCCCACTAGCTGGAAACCTAGCACACGCC  
GGGGCATCCGTAGACCTCACAATCTTTTCCCTTCACCTTGCCGGAATTTTCATCAATTC  
TAGGGGCAATCAACTTTATTACCACCATTATCAACATGAAACCAACAGCAGTCACTA  
TGTACCAAATCCCACTGTTTGTGGGGCGTACTAATTACCGCCGTTCTTCTCCTCCT  
TTCCCTTCCGGTCTTAGCCGCTGGCATTACAATGCTACTAACAGACCGCAACCTGAA  
CACAACTTCTTTGATCCTGCTGGAGGAGGTGACCCCATCCTCTACCAGCACCTGTT  
CTGATTCTTTGGCCACCCAGAGGTATACATTTTAATTCTTCCAGGCTTCGGGATAATT  
TCTCACATTGTTGCATACTATGCAGGTAAGAAAGAACCCTTTGGCTACATGGGCATG  
GTCTGAGCTATGATGGCTATTGGACTCCTGGGCTTCATCGTATGGGCCCATCACATG  
TTTACAGTCGGAATAGACGTAGACACACGAGCTTACTTTACCTCAGCCACAATAATT  
ATTGCCATCCCAACCGGCGTAAAAGTCTTTAGCTGACTCGCAACCCTCCACGGGGGA  
AGCATTAAATGAGAAACCCCACTTCTATGAGCTCTAGGCTTTATTTTCCTATTTACAG  
TCGGAGGTCTTACTGGTATTGTCTTAGCTAACTCGTCTCTTGATATTGTACTTCATGA  
CACATACTATGTAGTAGCCCACTTCCACTATGTCTATCAATAGGAGCTGTATTTGC  
AATCGTTGCCGCCTTTGTGCACTGATTCCCCCTATTTACAGGCTACACCCTCCACTCT  
ACATGAACAAAAGTCCACTTTGGCCTAATGTTTGTGCGGAGTCAATTTAACATTCTTC  
CCCCAACACTTCCTCGGTCTAGCAGGAATACCTCGACGGTACTCAGACTACCCCGAT  
GCATACACGCTTTGAAATACTGTCTCATCAATCGGGTCGCTAATGTGCTCGTTGCT  
GTTATCTTATTTTTATTTATTATTTGAGAAGCATTTACTGCCAAACGAGAAGTCGGGG  
CAGTAGAACTAACTTCACTAATATTGAATGACTTTACGGCTGCCCTCCACCCTACC  
ACACATTTGAAGAGCCCGCATTCGTTCAAGTTCGTATAAACTAAATGGCACATCCAT  
CACAACCTGGGATTTACAGGACGCAGCTTCCCCCCTAATAGAAGAACTACTTCACTTCC  
ATGATCACGCCTTAATAATTGTTATTCTCATCAGCACAATAGTACTGTATATTATTGT  
GGCAATGGTCACGGCCCACTAACCAGACAAGCTTGTGTTAGACTCTCAAGAAATTG  
AGGTTATCTGAACAGTTCTCCCAGCTATTATTCTTATTCTCATCGCCCTCCCATCACT  
CCGAATTTTATACTTAATAGACGAAATTAACGACCCCCACCTGACAATTAAGCCTT  
GGGCCACCAATGGTACTGAAGCTACGAATACACAGACTACCAAGACCTCGGTTTTG  
ACTCCTACATAATCCCAACTCAAGACCTAACCCCCGGACAATTCCGGCTATTGGAAG  
CAGACCATCGAATGGTAATTCCTGTAGAATCTCCGATTCGAGTTCTAATTTTCAGCTG  
AAGATGTCTTGCACTCCTGAGCAGTCCCTTCCCTGGGCGTAAAAGTAGACGCCGTAC  
CTGGACGGTTAAACCAAGCAACCTTTATTGTTAGCCGACCCGGCGTGTTCTACGGCC  
AATGCTCCGAAATTTGCGGTGCAAACCATAGCTTTATGCCCGTCGTTGTAGAGGCAG



TCCCACTTGACCACTTTGAGAACTGGTCTTCGCTAATAATTGAAGACGCCTATGGCC  
CATCAAGCACACCCATAACCACATAGTCGACCCTAGCCCATGACCCCTCACGGGGGCT  
ATTGCTGCCCTATTGATAACATCTGGCCTTGCTATCTGATTCCACTTTCACTCCACAA  
CCCTAATAACTATCGGAACAGTTCTTCTTATTTTAACAGTCTTCCAATGATGACGTGA  
TGTTGTTTCGAGAAGGCACATTTCAAGGACACCACACCCCTCCCGTTCAAAAAGGCCT  
CCGATACGGAATAATCTTGTTTATTACCTCAGAAGTTCTATTCTTCCTAGGTTTCTTC  
TGGGCCTTTTATCACTCGAGCCTGGCACCTACCCCTGACCTAGGCGGCTTCTGGCCA  
CCAGCAGGGATCACCCCCTTGGACCCATTTGAAGTCCCACCTTCTAAACACAGCAGTC  
CTACTTGCCCTCTGGCGTAACTGTAACATGAGCACATCATAGCATTATAGAGGGGAAAA  
CGAAAACAAGCAATTCAATCTCTTGCTCTAACAATCTTACTCGGGGGTTACTTCACC  
TTCCTCCAGGGCCTTGAATACCACGAAGCCCCCTTCACTATTGCAGACGGGGTTTAT  
GGTGCCACATTCTTTGTTGCCACCGGCTTCCACGGACTTCACGTCTTAGTTGGCTCCT  
CCTTCTTAGCCGTCTGTCTCCTACGCCAAATTCTTCACCATTTTACATCAGACCACCA  
CTTCGGGTTTGAAGCAGCCGCATGATACTGACACTTCGTAGACGTCGTCTGACTCTT  
CCTCTATATCTCTATTTACTGATGAGGATCTTAATGGCCAATCTCCGTAAATCCCACC  
CCCTTCTTAAATCGCAAACGATGCTTTAGTTGATCTCCAGCCCCCTCAAACATCTC  
TGTCTGGTGAACTTTGGGTCCCTCTTGGGACTCTGTTTAGTAACCCAGATTGCCACC  
GGCTTATTCTTAGCCATACTACACATCTGATATTGCTACTGCCTTCACCTCCGTTG  
CACACATCTGTTCGAGACGTCAACTACGGTTGACTCATCCGAAGCATTTCATGCCAACG  
GCGCATCATTCTTTTTCATTTGCATTTACCTTCATATCGGCCGGGGTCTATACTATGG  
CTCTTACCTTTATAAAGAAACATGAACATTTGGAGTTGTACTGCTACTTCTCGTTATA  
ATGACGGCCTTCGTTGGGTACGTCCTCCCTTGAGGACAAATGTCATTCTGGGGTGCA  
ACTGTCATTACCAACCTTTTATCTGCCGTCCCTTATGTTGGGGGCACACTTGTCCAGT  
GAATCTGAGGCGGCTTTTCTGTAGACAATGCCACCCTTACCCGGTTCTTTGCATTCCA  
CTTCCTTTTCCCATTTCATCATTGCGGCCGCAACAGTAATCCATCTACTCTTTCTCCAC  
GAAACGGGCTCAAACAACCCACCGGACTAAACTCAGACTCTGATAAAGTCCCCTT  
CCACCCCTACTTCACATACAAAGACCTCTTGGCTTTGCAGTTCTCCTTACTGCACTGG  
CTTCGCTCGCCCTATTTTCCCCCAATCTCTTAGGAGACCCGGACAACCTTCACGCCTGC  
AAACCCGCTCGTCACACCACCACACATCAAGCCAGAGTGATACTTCCTCTTTGCCTA  
CGCTATTCTGCGCTCCATTCCAAACAAGCTTGGTGGAGTACTTGCTCTTTTATTCTCC  
ATCCTCGTTCTCATGCTCGTCCCCTTTCTCCACACCTCAAAACAACGAAGCCTCATAT  
TTCGCCCTGTAACACAATTCCTATTTTGGTCTTTAGTAGCCGACGTAATAATTCTGAC  
CTGAATTGGAGGGATACCCGTAGAACACCCCTTCGTTATCATCGGACAAGTAGCATC  
TCTCATCTACTTCTCCCTTTTCTAGTCCTAATCCCAACAGCAGGCTTAATGGAAAAT  
AAAGTCCTCGGATGAAAATATGATTTCAACCCTCATTACGCATATTATTAACCCACT  
AGCCTTTATTGTCCCGGTTTTACTAGCCGTAGCATTCTTAACCCTCCTTGAGCGAAAA  
GTACTAGGCTACATACAACTCCGAAAAGGGCCTAACATCGTTGGGCCTTACGGCCTC  
CTTCAACCTATCGCTGACGGCCTAAAGCTATTTATTAAAGAGCCCGTTTCGCCCTTCC  
ACTGCCTCGCCCGTCTTGTTCTCGTAGCCCCCATGCTCGCGCTCACACTAGCCCTTA  
CACTTTGAGCCCCCATACCTTTCCCGTATCCTGTTGTTGACCTTAACCTGGGCATTTT  
GTTTATCCTAGCACTATCTAGCCTTGACGTTTATTCCATCCTTGGGTCAGGGTGGGCT  
TCTAATTCAAAGTATGCTCTAGTGGGGGCACTACGGGCTGTTGCCAGACAATTTCC  
TACGAAGTGAGCCTCGGACTCATCTTACTTAACATCATTATCTTTACGGGAGGCTTC  
ACACTTCAGACCTTCAACACAGCCCAAGAAGCTATCTGACTGGTGGTACCCGCTTGA  
CCACTGGCTGCTATGTGATACATCTCCACCCTTGCCGAGACAAACCGTGCACCTTTC  
GACCTGACAGAAGGGGAGTCAGAGCTTGTTTCAGGCTTCAACGTAGAGTACGCCGG  
AGGACCCTTTGCCCTGTTCTTTTATGCTGAATACTCAAACATCCTCCTAATGAATGCT  
CTATCCGCAACACTTTTCTGGGGCGCTTCCCACATTCCGTCCATCCCCGAATTAACCA  
GCATCAATATCATAACCAAAGCAGCTCTTCTCTCAGTCGTCTTCCTCTGAGTCCGAG  
CCTCCTACCCGCGGTTCCGTTATGACCAACTTATGCACCTCATTGAAAAAACTTTCT  
TCCACTGACGCTAGCCCTAGTTATCTGACACTTAGCGCTCCCTATTGCATTTGCTGGC  
CTCCCACCACAGCTGTAGATGAACCCCTACATCTTGACCACCCTTCTATTTGGTTTGG

GCCTAGGTACAACACTCACATTTGCAAGCTCGCACTGACTTCTGGCTTGAATGGGCC  
TCGAAATTAATACTGGCCATTATTCCACTGATAGCCCAACATCACCACCCACGGG  
CGGTAGAAGCCACTACTAAGTACTTTTTAGCACAGGCCACAGCAGCCGCCACCCTCC  
TCTTTGCTAGCACCAACGCCTGACTTACCGGACAATGGGACATCCAACAAATAA  
CCCACCCACTTCCCCTACAATAGTCGTGATTGCCCTTGCACTAAAAATTGGCCTAG  
CACCCATGCACTCTTGACTCCCCGAGGTTCTTCAGGGCTTAGACCTCACCACCGGCC  
TTATCCTATCGACCTGACAAAAGCTTGCACCCTTTGCTCTATTACTCCAAATTCAAAC  
AACAAACCCACACCCCTAATCATTATCGGCTTACTTTCTGCCCTTGTGGGCGGGTGA  
GGGGGCCTTAACCAGACACAACCTGCGTAAGGTCCTTGCCCTACTCCTCAATTGCACAC  
CTCGGCTGAATGATACTTATCCTTCAATTTTCACCACTCCTTAGCCTCCTTGCTCTTCT  
CACGTATTTTCTATGACTTTTTTTCAGCATTTCTCATCTTCAAAGTAAACAAAGCTACCA  
CTGTTAATGCACTCGCAATCTCCTGAGCAAAAACCTCCCGCCCTTACAGCCCTAGCGC  
CTCTTGTTTTGCTTTCCCTCGGCGGCCTTCCACCACTCACTGGGTTTCATACCAAAATG  
ATTTATCCTTCAAGAACTAACTAAACAAGACCTCCCACGCTTGCTACCGTTGCTGCA  
TTAACTGCCCTTTTGAGCCTTTACTTTTACCTGCGTCTCTCATAACGAATAACCCTGA  
CAATGTTCCCTAACAACCTCGTTGGTGTGGCCCCCTGGCGATTTTACTCACCTCAATT  
TACCCTCCCCCTCGCCGTCTCAACTGCAGCAACCACCCTTCTTTTACCCTAGCCCCCT  
GCTGCCGTGGCACTCCTCATCACTTATGAGCCTTCTTCTTACCATCATTACAATTACC  
GCCCTCCTCTCAACGGTACTTGCCATTGTATCCTTCTGACTCCCCCAAATTACACCAG  
ATCATGAGAACTCTCACCTTACGAGTGTGGCTTTGACCCCATAGGTTCCGCCCCGAC  
TACCTTTCTCGCTACGATTTTTTCTCATCGCAATCCTCTTTCTTCTTTTCGACTTAGAA  
ATTGCTCTTCTCCTCCCCCTCCCGTGGGGAGACCAGCTAGCATCCCCTCTGCTTACAT  
TTACCTGAGCTACGGCCGTCTATCCCTGCTAACCCTTGGCCTCATTTACGAGTGAAT  
GCAAGGAGGCCTAGAATGAGCTGAATATGCTAAAGATTCTCATCCCAACATTTCATG  
CTAATTCCAACAGCTTGACTGCTTAAACCCAACTGGCTGTGGCCCATAACTTTATTG  
TATAGCTTCTGCATTTCCCTTATTAGCCTCTCATGACTAAAAAACCTCTCAGAAACCG  
GCTGATCCTCACTCAACCTATTCATAGCCACCGACTCCCTGTCAACCCCACTTCTTGT  
CCTCACATGCTGGCTTCTTCCGTTAATAATTTTGGCGAGCCAGAAGCACACAGCTTC  
TGAGCCCCCTCGGCCGGCAACGCATGTACATCACTTCTCGCCTCCTCCAATTTTTTC  
TAATCTTAGCATTTAGCGCCACCGAGCTAATCATGTTTTACGTAATATTTGAGGCTA  
CTCTCATCCCTACGCTTATCATCATCACCCGCTGGGGTAACCAAACCGAACGCCTAA  
ATGCAGGGACCTATTTCTCTTCTACACACTGGCGGGCTCCCTTCTCTTCTTGTGCG  
CTTACTCTTACTCCAAAACACATCCGGGACTCTCTCATTACTGACACTACACTACGG  
AGACCCGCTAGCTGTATCCTACGCAGACAACTATGGTGAGCAGGCTGTCTTTTAG  
CCTTCTGTTAAGATGCCACTCTATGGTGTTACCTATGGCTACCTAAAGCACACG  
TTGAAGCCCCAATTGCAGGCTCAATAATCCTTGACGCTGTCTACTTAACTAGGGG  
GCTACGGCATAATTGCGATAATAACAATGCTGGAACCTTTAACTAAGGAGTTGAGCT  
ACCCATTCAATTGTCTTCGCACTCTGGGGTGTAATCATGACCGGCTCAATTTGTCTACG  
CCAAACAGACCTTAAATCCCTAATTGCCTACTCATCCGTCAGCCACATGGGCTTAGT  
TGCCGGGGGGATTCTCATTCAATCACCCCTGAGGTCTCACAGGAGCACTTACACTTAT  
GATTGCACATGGTCTTACCTCCTCAGCCCTCTTCTGCCTCGCAAACACAACTATGA  
ACGAACCTCACAGCCGCACAATGGTCTTGGCACGAGGACTTCAGGTGGCTTTACCCCT  
AACGGCCACTTGATGGTTTATCTCTAGCCTAGCTAACCTCGCCTTACCTCCGTTGCCC  
AACCTCATGGGGGAACCTCATAATTACTTCTCTTTTTAACTGGTCCTGATGAACCC  
TGGCATTAAACAGGCTCCGGCACTCTTATCACAGCCGGTTATAGCCTCTACATGTTCTT  
AATGACCCAACGAGGCCCTCTCCCAACACATGTAATTGCACTTGAACCATCACACAC  
CCGAGAACACCTTCTTATTGCCTTCATCTCATTCTCTTGTCTCTCGTGCTTAAGCC  
CGAGCTGATCTGAGGTTGAACTGCCTATGACCCCCACACACTTTGCCTTCTCCTCAG  
CCTTTTTTCTAGGTTTAAACAGGCCTGGCATTCCACCGGTTCCACCTCCTCTCCGCGCT  
ATTGTGCCTTGAAGGGATGATACTATCCCTATTTGTTGCCCTCTCTCTGTGAACACTT  
CAACTAGACTCAACTAACTTTTCGGCATCTCCCATGCTCCTCCTTGCAATTTTCAGCCT  
GCGAAGCAAGCGCCGGGCTCGCCCTTCTAGTTGCGACTGCCCCGAACCCATGGGACC

GACCGACTACAAAGCCTAAACCTCCTCCAATGCTAAATGCACCCCACCTCCCTAATG  
ATCTCATCAAGCTTGGTTACAATCTTCGCATTACTAGCCTACCCCCTGGTCACCACA  
ATTCGTCCAACGCCCCGGGGCCCCCAATGGGCAACATCCCATGTCAAAACAGCTGT  
AAAAATAGCTTTCTTTGTTAGCCTCTTACCCCTGGCCCTGTTTCTTAATGAAGGTGCC  
GAGACAATTGTTACTAATTGAACCTGAATAAACACAAACACCTTCGACATTAACATT  
AGCCTAAAATTTGACTTTTATTCGATTATTTTTACACCAATCGCCCTTTACGTCACTT  
GATCTATTCTAGAGTTTGCATCATGGTATATGCACGCTGACCCACACGTGAACCGCT  
TTTTTAAGTACCTTCTGACATTTCTAATTGCCATGATCATTCTAGTAACCGCAAACAA  
CATATTTCAACTCTTTATCGGTTGAGAAGGTGTAGGAATCATATCATTCTCCTCATC  
GGGTGGTGGTACGGACGGGCGGACGCTAACACTGCAGCACTCCAAGCAGTCCTATA  
CAACCGTGTGGGGATATCGGGCTTATCTTCGCCATGGCTTGAATAGCAACAAACCT  
GAACTCCTGGGAAATGCAACAAATCTTTGCAACCTCCAAAGACATGGACTTGACCT  
ACCCCCTCCTCGGACTAATCGTTGCAGCAACTGGGAAGTCGGGCTCAGTTTGGACTCC  
ACCCTTGGCTACCCTCAGCCATGGAGGGTCTACACCGGTATCTGCCCTACTTCATT  
CTAGCACAAATAGTTGTTGCCGGCATTTCCTGCTAGTACGAATGAGCCCCCTTCTGG  
AAAATAACCCGACTGCCCTCACAACTGCCTTTGTCTTGGTGCCCTTACGACTCTATT  
CACAGCAACTTGTGCCCTCACCCAGAATGATATCAAAAAAATCGTCGCATTCTCTAC  
ATCAAGCCAGTTGGGACTTATAATGGTAACTATTGGACTAAACCAGCCCCAACTAGC  
ATTTCTCCACATCTGTACACACGCTTTCTTTAAAGCCATACTGTTTCTTTGTTCCGGG  
TCTATTATCCACAGCCTAAACGACGAACAAGACATCCGAAAAATAGGCGGCATGCA  
CCACCTTGCACCTTTTACATCATCTTGCCTAACAAATCGGCAGCCTCGCCCTCACAGGT  
ACCCCCTTCTTGGCCGGTTTCTTCTCTAAAGATGCCATCATCGAAGCATTAAACACA  
TCCCACCTAAACGCCTGAGCCCTAACCTTACTCTCCTGGCCACATCTTTCCTGCAA  
TCTACAGCTTCCGGGTAGTCTTCTTTGTGCCCATGGGCCATCCCCGATTCAGCCCATC  
TCCCCAATTAACGAGAACAACCCAGCAGTAATTAACCCACTTAAACGACTAGCATG  
AGGCAGCATCATTGCAGGACTGCTAATTACCTCAAACATTACACCTCTAAAAACACC  
TGTGATATCTATGCCTCCCCTTCTTAACTAGCCGCCCTCGCAGTTACAATCCTAGGT  
CTACTTGTGTGCTATAGAACTCGCCATATTAACCAACAAGCAGTTTAAATCAACCCCA  
GTCTTAACGTACACAATTTCTCCAACATACTAGGCTTCTTCCCTGCCATCGTACATCG  
CCTGACCCCCAAATTGGGCCTAGTCCTCGGCCAAGACATCGCCAACCAAATAGTAG  
ATCAAACCTGACTAGAGAAAGCGGGCCCCAAAAGCCATTGTATCCTCCAACCTACCC  
CTGGTTTCTTCTACAAGTAATATCCAACGAGGGATAATCAAAACGTATCTACTCTTT  
TCCTTTTAACTAGCCCTTATAATCCCCACACTCATCCCCTAATGACTTTTGTTATA  
TATTTAGTTTTATTTTCTTGTGTGGGGTTAGTCGCAGTTGCTTCTAATCCGTCCCC  
CTACTTTGCTGCTTTGGGGTTAGTTGTGGTAGCTGGCATGGGGTGTGGTGTACTAGT  
CGGGCATGGGGGGCCATTTTGTCTTAGTTCTTTTTCTAATTTACTTGGGCGGGATG  
TTAGTTGTGTTTGCATATTCAGCAGCGTTAGCTGCTGAGCCATACCCCGAGAGCTGA  
GGTAGCTGGTCGGTAATGGTGTATGGTTGTTTATGTGGCGGGGGTAGTGTAGTTTCT  
GGGCTGTTCTGAGGCGGGTGGTATGAATCGTCATGGGTTTTAGTAGATGAGCTGGCC  
GAATTCTCGGTATTCCGGGGTGATATTGGAGGAGTGGCCTTAATATACTCTTCTGGG  
GGATGGTTACTGATCATTAGTGCATGGGTGCTGCTTCTTACCCTGTTTGTAGTCCTTG  
AGTTAACCGTGGTTTGAGCCGAGGGGCGTTGCGACGTTT

*Pleuronichthys cornutus* JQ639071

ATGACACTAAGCCTATTTGACCAATTTGAATCCCCCGTACTATTTACATCCCTCTAA  
TTGTACTGGCAATTGCCCTTCCATGAGTACTACTTCCTGTCCCCGGACTCGATGAATT  
AGTAACCCCCTACTAGCGTTTCAAGGCTGGTTTATTAAACAATTCACCTCACAAATC  
CTCCTTCCCCTAAATACACCTGGGCATAAGTGAGCACTTCTCTTCGCCTCCCTCATCT  
TTCTTCTTTCTATTAACGTGCTTGGACTTCTTCCTTACACCTTCACACCTACTACTCAA  
CTATCCTTTAACCTAGGACTTGCAGTACCCCTATGACTAGCAACAGTAATTATGGAA  
TACGTACCCAACCGACACATGCATTAGGTCACCTTCTACCAGAAGGTACTCCAACCTG  
CCTTAATTCTGTGCTAGTCATTATCGAAACAATCAGCCTATTTATTCGCCCTATTGC  
CCTCGGTGTTCCGGTTGACAGCAAACCTTAACAGCAGGTCACCTCCTAATTCAACTTAT

TTCAACAGCCACTTTTGTATATACTACCAATTATACCCACTGTTGCTATTTTTACCACA  
ACACTTCTGCTTCTTCTCACGCTCCTAGAAATTGCTGTTGCTATAATTCAGGCCTACG  
TCTTCGTCCTACTCTTAAGCCTCTACCTACAAGAAAACGTCTAATGCCTCAACTCAA  
CCCCGGCCCTTGATTTTTTCATTTTAGCTGTCTTATGACTTTTATTTTTATCTCTCGCAC  
CCCGAGTACTTTTAAAACACCTCTTCCCTAACAAAATAACACCCGAAGGAAAATTAG  
AACAAAATATGACCCTGAACCTGACAATGACACTAAGTGGCAATCACACGTTGATT  
CTTCTCAACCAATCACAAAGACATCGGCACCCTCTATCTTGTATTTGGTGCCTGAGC  
CGGAATAGTAGGGACAGCCCTAAGCCTGCTTATTCGAGCAGAACTAAGCCAACCCG  
GAGCCCTCCTTGGGGACGATCAGATTTATAATGTTATCGTTACTGCACACGCCTTTG  
TAATAATCTTCTTTATAGTAATACCAATTATGATTGGAGGGTTTGGAACTGACTTA  
TTCCTCTAATGATCGGGGCCCCTGATATAGCCTTCCCCCGAATGAACAACATGAGCT  
TCTGGCTCCTTCCCCCATCCTTCCTCCTCCTTCTTGCCTCCTCAGGTGTTGAAGCTGGT  
GCCGGCACAGGATGAACTGTATATCCCCCTCTAGCCGGTAACCTAGCGCATGCAGG  
GGCATCCGTAGACCTCACAATTTTCTCACTTCACCTCGCAGGAATTTCTCTCAATTCTA  
GGAGCCATTAACCTTCATCACTACTATTATTAATAATAAAACCTACGGCTATAACTATG  
TACCAGATCCCCTACTTTTGTCTGAGCCGTAATAATTACAGCTGTCCTACTCCTTCTCT  
CTCTCCCAGTTTTAGCCGCTGGCATCACAATGCTACTAACAGATCGAAACCTCAACA  
CAACTTTCTTTGACCCTGCTGGAGGGGGTGATCCCATTCTTTATCAACACTTGTTCTG  
ATTCTTCGGTCACCCAGAAGTCTACATTCTGATTCTCCCAGGCTTCGGAATAATTTCA  
CACATTGTTGCCTACTACGCAGGCAAAAAAGAACCCTTCGGCTACATGGGGATGGT  
CTGAGCTATAATAGCAATTGGCCTCCTTGGGTTTATCGTCTGAGCCCATCACATGTTT  
ACAGTTGGGATGGATGTTGACACACGTGCATATTTTACATCCGCCACAATAATTATT  
GCAATTCCAACCTGGTGTAAGTATTTAGTTGACTCGCCACACTTCATGGAGGGGAT  
ATTAAGTGAGAAACACCCCTACTATGAGCACTCGGTTTTATCTTCCTATTTACAGTC  
GGAGGTCTAACTGGAATTGTATTGGCTAACTCATCACTGGACATTGTTTTACACGAC  
ACATACTACGTCGTAGCCCATTTCCACTACGTCTTATCTATAGGCGCTGTCTTCGCTA  
TTGTTGCTGCTTTCGTACACTGATTCCCCCTATTTACAGGCTACACTCTTCACGAAAC  
ATGAACCAAAGTTCATTTTGGCGTAATGTTTCGCAGGGGTAACTTAACATTCTTCCC  
ACAACATTTCTTAGGATTAGCCGGAATACCCCGACGATACTCGGACTACCCAGATGC  
CTTTACTCTGTGAAACACAGTTTCATCATTTGGCTCCCTAGTGTCCCTAGTTGCCGTA  
ATTATGTTCTTGTTTCATCATTTGAGAAGCATTACAGCCAAACGAGAAGTTCAATCA  
GTAGAATAACCGCAACTAATATTGAATGACTTCACGGCTGCCCCCACCTTATCAC  
ACATTTGAAGAACCTGCATTTGTTTACGGTACGAATAGACTAAATGGCCCATCCCCTA  
CAACTTGGAATTTCAAGATGCAGCTTCACCACTAATAGAAGAGTTACTTCACTTTCAC  
GACCACGCCCTAATAATTGTTATTCTTATTAGCGTAATAGTACTTTACATTATTGTAG  
CTATGGTTACAGCTCAATTTACAGATAAGCTTGTGCTCGACTCCCAAGAAATCGAGA  
TTATCTGAACAATTCTTCCAGCTATTATTCTTATTCTTATTGCTCTACCATCCCTCCGA  
ATTTTATACCTAATAGATGAGATTAATAGCCCGCACCTTACAGTAAAAGCTTTAGGC  
CACCAATGATACTGAAGCTATGAATATAACAGATTACGATGACCTTGGCTTTGACTCG  
TATATAATTCCCACACAAGACCTCACCTCCGGCCAATTCCGACTTTTAGAAGCAGAC  
CATCGCATAGTAGTCCCCGTAGAATCCCCTGTTTCGAGTTTTAATTACCGCCGAAGAT  
GTCCTTCATTCATGAGCAGTACCAGCCCTAGGCACAAAAGTCGATGCTGTCCCAGGA  
CGATTAAACCAAGCAACTTTTACTATCAGCCGGCCAGGCGTATTCTTTGGTCAATGC  
TCTGAAATTTGTGGGGCTAATCACAGCTTCATGCCAATTGTTGTAGAAGCAGTTCCC  
CTAGAACACTTCGAATCCTGATCTTCATTAATAATTGAAGAAGCCTATGGCCCATCA  
AGCACACCCATTTACATAGTCGACCCAGCCCTGGCCCTTACAGGCGCCATCGC  
TGCCCTACTAATAACGTCCGGCCTTGCTATCTGATTTCACTTCCACTCTACAACCCTG  
ATAACTTTAGGTACAATTCTTCTCATTTTAAACAGCTTTCCAATGATGGCGAGATGTTG  
TTCGAGAGGGTACCTTTCAAGGTCACCACACCCACCAGTCCAAAAAGGGCTTCGGT  
ACGGTATGATCCTCTTCATTACCTCCGAAGTTCTGTTCTTCTTGGGCTTTTTCTGAGC  
TTTTTATCACTCAAGCCTAGCACCCACCCCTGAGCTAGGCGGTTTTCTGACCACCAGC  
TGGCATTACCCCTCTGGACCCATTTGAAGTACCCCTACTCAATACAGCAGTCCTTCTT

GCCTCAGGCGTTACAGTCACATGAGCCCACCACAGCATCATAGAAGGTCAACGAAA  
ACAAGCCCTTCAATCCCTTGCACTTACAATCTTACTCGGAGGCTACTTCACTTTCCCTT  
CAAGCCCTTGAATACCACGAAGCCCCCTTTACTATTGCAGACGGGGTGTATGGCGCC  
ACATTTTTTTGTGGCTACTGGCTTTACGGCCTCCACGTATTAATTGGCTCTTCATTTTT  
AGCTGTCTGCTTTCTCCGCCAAGCCCTCCACCATTTCACATCAAACCACCATTTTTGGG  
TTTGAAGCAGCCGCATGGTACTGACACTTCGTAGACGTCGTCTGACTCTTCCTCTAC  
ATCTCTATTTACTGATGAGGATCTTAATGGCCAGCCTACGAAAGTCCCACCCCTTTT  
AAAAATCGCAAACCATGCTTTAGTCGATCTCCCATCCCCCTCCAACATCTCTGTTTG  
ATGAAATTTTGGATCCCTTCTAGGACTGTGCTTAATTATTCAAATCGTAACAGGCCT  
CTTCTTAGCTATACACTATACCTCAGATATTGCAACTGCTTTTACCTCTGTAGCCAC  
ATTTGCCGAGACGTCAACTACGGTTGGCTAATTCGAAATGTGCATGCCAACAGCGCA  
TCATTCTTTTTTATTTGCATCTACCTTCACATTGGCCGAGGCCTCTACTACGGCTCGT  
ACCTCCAAAAGGAAACATGAAACGTTGGTGTGTCCTTCTTCTACTCGTCATAATAA  
CAGCCTTTGTTGGATACGTTCTCCCCTGAGGTCAGATGTCAATYTGAGGCGCAACCG  
TCATTACCAACCTTCTCTCTGCGGTACCCTATGTTGGTAACACGCTGGTTCAATGAAT  
CTGAGGCGGATTTTCTGTAGACAATGCTACTCTCACCCGATTCTTCGCATTTCACTTC  
CTTTTTCTTTTCATTATTGCAGCCGCAGCAGTAATTCACCTACTCTTCCTGCACGAAA  
CAGGCTCAAACAACCCACCGGTCTTAATTCAGACTCTGATAAAATCCCCTTCCACC  
CCTACTTCTCGTATAAAGACCTCTTGGATTGCAATCCTTCTTACAGCTTTGGCATCC  
CTTGCCCTATTCTCCCCCAATCTCTTAGGAGACCCCGACAACTTTACCCCGCAAAC  
CCGCTTGTTACACCCCTCATATTAAGCCAGAATGATACTTCCTGTTTGCATATGCTA  
TTCTACGCTCCATCCCCAACAAGTTGGGAGGAGTACTTGCCCTCTTGTTCTCCATCCT  
AATCCTTATGCTTGTGCCCCTCCTCCACACCTCTAAACAACGAAGTCTTATATTCCGC  
CCCTTCTCGCAATTCCCTATTCTGATCCTTAGTAGCAGATGTAATGATCCTTACCTGAA  
TCGGAGGAATGCCCCGTTGAACACCCCTTTGTTATTATTGGACAGGTTGCATCATTCT  
CTACTTCTTCCTATTCTGGTACTAATCCCCCTAACAGGTTGACTGGAAAACAAAGC  
ATTAGCTTGAAAATATGATTTTCGACCCTCATCACACATGTTTTTAACCCCTACTATT  
CATTGTTCCCTGTATTACTAGCCGTAGCATTCCTGACCTTACTTGAACGGAAAGTCCTT  
GGCTACATACAACTCCGAAAAGGACCAAACGTCGTAGGACCCTACGGCCTTCTTCA  
ACCCATCGCCGATGGCATTAACTATTTATTAAGAGCCCGTACGACCCTCCACCGC  
TTCCCCTGTTCTCTTTATCCTTGCCCCCATGCTCGCACTCACCTAGCTCTCGCACTTT  
GAGCCCCCATACCCCTTCCACACCCCATAGCTGACCTTAACCTCGGTATCTTGTTTGT  
CTTAGCATTGTCCAGCCTTGCAGTTTATTCCATCTTAGGTTCAAGGCTGAGCCTCAAAC  
TCAAAATATGCACTCATCGGGGCTCTCCGGGCTGTTGCACAAACCATCTCCTACGAA  
GTTAGCCTCGGCCTCATTTTACTCAACATTATTATTTTTTCCGGCAGCTTCACTTTAC  
AAACCTTTAACACAACCCAAGAAGCCATCTGATTAATTGTCCCTGCCTGACCTTTGG  
CTGCCATGTGGTATGTTTCTACCCTAGCAGAGACAAACCGAGCACCTTTTCGACCTAA  
CGGAAGGTGAGTCTGAACTTGTTTCCGGGTTTAACGTAGAGTATGCAGGTGGACCCT  
TCGCCTTGTTTTTCTAGCTGAATACTCCAACATCCTTCTTATGAACACCCTCTCTGC  
AGTACTATTCTTGGGAGCTTCTCATATCCCAACTTTTCCAGAATTAACAAGTATTAAT  
CTTATAACCAAAGCCGCTCTTCTCTCAGTAGTGTTCTTATGGGTCCGAGCCTCATACC  
CCCGATTTTCGTTACGACCAACTTATGCACCTCACCTGAAAAAGCTTTCTCCCTCTCAC  
ACTGGCATTAGTTATTTGACATTTAGCTCTCCCTATTGCATTTGCGGGCCTCCCACCA  
CAACTGTAGATGAATCCTTACATCTTAACCACCCCTTCTATTTGGCTTAGGTCTTGGTA  
CAACACTTACATTTGCAAGCTCTCACTGACTCCTTGCTTGAATAGGCCTTGAAATTA  
ACACTCTCGCTATTCTTCCCCTTATAGCCCGGCACTACCACCCCGAGCAGTTGAAG  
CTACCACTAAGTACTTCTTACACAAGCTGCAGCAGCCGCCACCCTCCTTTTTGCAA  
CTATAACCAACGCTTGACTTACAGGCCAATGAGATATTCAACAAATGACTCATCCCC  
TCCCAACAACAATAATTATCGTTGCCCTAGCCCTAAAAATTGGCCTTGACACCAGTGC  
ACTCCTGACTACCAGAAGTTCTTCAAGGTCTCGACCTAACCCTGGATTAATCCTCT  
CTACTTGACAGAACTTGCCCCCTTCGCCCTCCTCATACAAATTCAGACAACAACCC  
CACCCCTCTTATTATTATGGGGTTACTTTCTACCTTGGTTGGGGGTTGAGGTGGCCTC

AATCAAACCCAGCTACGCAAGATTCTTGCTTACTCCTCAATTGCCACCTCGGCTGA  
ATAGTTTTGATTCTCCAATTCTCACCCACCCTTACCCTCCTTACACTTCTTGCGTATAT  
TCTATAACTTTATCAATATTTTTAATTTTCAAATAAAATAAAGCCACCACCATTAATG  
CCCTTGCTATCTCCTGATCTAAAACCCAGCTCTTACGGCACTAACCCCTCTCATCCT  
TCTCTCTCTTGAGGCTTACCCCTCTTACAGGTTTTATGCCGAAATGACTTATCCTT  
CAAGAATTTACTAAACAAGACTTACCCTGCTTGCCACCCTTGCCGCACTTACTGCCC  
TCCTTAGCCTCTACTTCTATTTACGCCTCTCCTATGCCATAACGCTCACCATATTCCC  
CAATAACCTTGTAGGCGCAACCCCTGACGGCTTTACAACCTCCCAACTTACTCTCCC  
TCTCGCCACATCCACCACGGCGACTATTCTTCTCCTTCCACTAACCCCGCTGCTCTA  
GCACTACTTACCACCTATGAACCTTCTCCTAACTATTGTTACAATTACAGCCCTTCTA  
TCTATAATCCTCATAATTGTCTCTTTTTGGCTTCCCCAAATGACACCTGATTATGAAA  
AACTTTGCGCATACGAATGCGGCTTCGACCCGGTAGGTTTCAGCGCGACTACCTTTTT  
CACTACGATTTTTTTAATTGCCATCCTCTTTCTTCTGTTTGACCTAGAAATTGCACTC  
CTCCTCCCCCTCCCCTGAGGAGACCAACTAGCATCACCGTTACTAACGTTCTTGTA  
GCTACAGGCGTCCTTTCCCTCCTAACCCTTGGCCTCGTATACGAATGAATTCAAGGA  
GGCCTAGAATGGGCTGAATATGCTAATAATCTTAATCCCAACACTTATATTAATCCC  
AACAGCCTGGTTAACTAAACCAACCTGATTATGGCCAACAACCTTAAACGCATAGCTT  
TTGCATCTCCCTAGTTAGCTTATCGTGATTAAAAACATCTCAGAAACCGGGTGATC  
CTCTCTCAACTCATGAATAGCCACCGACCCGCTGTCAACACCTCTGCTCGTTCTTACA  
TGCTGACTACTACCCCTCATAATCCTAGCAAGCCAAAACCATACCACCTCAGAGCCT  
GTCAACCGCCAACGCATGTATATCACACTTCTAACCTCCTCCAATTTTTTCTGATCCT  
AGCATTTAGCGCCACTGAACTAATTATGTTTTATGTTATATTTGAGGCCACCCTTATC  
CCCACCTTAATTATTATTACCCGCTGAGGAAACCAGACAGAACGTTTAAACGCAGGA  
ACCTACTTCTCTTCTACACACTAGCAGGCTCCCTACCCCTCCTTGTTGCCCTTCTCC  
TTCTGCAAAACACAACAGGCACTCTATCCCTACTAACCTCCACTATGCAAACCCCT  
ACAATAATGTCACACGCAGACAACTCTGATGAGTGGGCTGCCTTCTAGCCTTCCTA  
GTCAAGATACCTCTTTATGGGGTACACCTATGACTCCCTAAAGCACACGTTGAAGCC  
CCCATTGCAGGCTCAATAATCCTTGACGCCGTTCTCCTTAAATTAGGGGGATACGGA  
ATAATTCGCGTAATACCAACCCTAGAGCCCCTAACCAAGGAATAAGTTACCCCTTT  
ATTATCTTTGCACTTTGAGGTGTAATTATAACTGGCTCCATTTGCCTCCGCCAGACCG  
ATCTAAAATCACTAATTGCTTACTCCTCTGTTAGTCACATAGGCCTTGTGGCTGGAG  
GAATCCTCATCCAGTCGCCCTGAGGCCTGACAGGTGCGCTTACCCTTATAATTGCCC  
ACGGCCTAACTTCCTCCGCCCTCTTTTGCTAGCAAATACTAATTATGAGCGAACCC  
ACAGCCGAACAATGGTCCTAGCACGCGGCCTTCAAATAGCGCTTCCTCTGATGGCAA  
CTTGATGATTTATTGCCAGCCTAGCTAACCTCGCTCTCCCACCTCTACCCAATCTTAT  
GGGAGAATAATAATTATCACTTCTTTATTTAACTGGTCTTGATGAACCCTAGCACT  
CACAGGTGCAGGCACCCTAATTACAGCTGCTTATTCTCTCTATATATTTTTAATAACC  
CAGCGGGGCCCCCTCCCAACACATGTTATAGCACTTAACCCCTCACACACTCGAGAA  
CACCTTCTCATCGCCTTCACCTCACTCCCTTAGTCCTATTAATACTCAAACCCGAAC  
AATCTGAGGCTGAACTGCTTATGACCCCAACACATTTTGCCCTTTTCTCAGCCTTTAT  
CTTAGGCCTGACAGGCCTGGCATTCCACCGGTCCCATTTACTGTCTGCCCTTTTATGC  
CTTGAAGCAATAATATTGTCCCTATTTGTTGCCCTCTCCCTGTGAACACTTCAACTAG  
ACTCCACTAATTTCTCAACATCCCCCATGCTTCTCCTCGCATTTTCAGCCTGTGAAGC  
AGGCGCTGGCCTGGCCTTACTAGTTGCTACTGCCCGCACCCACGGGACTGATCGCCT  
ACAAAGCCTAACTTACTACAATGCTAAATGCAGCCCACTTCTCTAATGATCTCGTC  
AAGTTTAATCACCATTTTTATGCTGTTAAGCTACCCATTACTTACCGCACTCCTTCCT  
ACCCCTCGGAGTTCCGATTGGTCTACTTCCCACGTCAAAACAGCAGTAAAAATAGCC  
TTCTTTGTTAGTCTTCTCCCTCTAGCCCTCTTTTTAAATGAAGGCGCAGAAACAATCG  
TTACAAACTGAACATGAATAAACACACACTCCTTCGACATTAGCATCAGCCTAAAAT  
TCGATTTTTACTCAATTATTTTTACACCTATTGCCCTCTATGTGACATGATCCATCTTA  
GAGTTTGCATCCTGATATATACACTCTGACCCCTATATAAGCCGTTTCTTTAAATACC  
TCCTCACCTTTCTAATTGCTATAATTATCTTAGTAACCGCAAACAACATATTTCAACT

TTTTATCGGCTGAGAAGGCGTAGGCATTATATCGTTCCTTCTTATTGGGTGATGGTAC  
GGCCGAACAGATGCAAATACTGCAGCCCTCCAAGCTGTTTTATATAACCGGGTAGG  
AGATATCGGACTTATCTTCGCCATGGCTTGAATAGCAACGAACTTAAATTCCTGGGA  
AATGCAGCAAGTGTTTCGCAAGCTCCAAAGGCATAGACCTGACTTACCCCTTCTTGG  
GCTAATCATTGCAGCCACTGGAAAATCAGCCCAATTTGGGCTCCACCCTTGGCTGCC  
ATCCGCCATAGAGGGGCCCTACACCGGTGTCTGCCCTACTTCACTCCAGCACCATAGT  
CGTTGCCGGTATTTTTTTACTGGTGCGAATGAGCCCCCTCCTGGAGGATAACCCAC  
TGCCCTGACAGTCTGCCTGTGCCTCGGAGCTTTAACCACCCTATTTACTGCCACATGT  
GCTTTAACTCAAAACGACATTAAAAAAATCGTTGCATTTTCCACATCAAGCCAACTA  
GGGTTAATAATAGTAACCATCGGCTTAAATCAACCACAATTAGCATTCCTTCACATC  
TGCACACACGCCTTTTTTAAAGCCATACTATTCTTGTGCTCCGGATCTATTATCCACA  
GCCTAAACGACGAGCAAGACATCCGAAAAATAGGGGGTATACACCACCTTACGCCC  
TTTACATCTTCATGTCTGACTATCGGAAGCCTCGCCCTTACGGGTACACCCTTCCTAG  
CGGGCTTCTTTTCAAAGACGCCATTATTGAAGCACTAAACACATCCCACCTAAACG  
CCTGAGCCCTCACCTCACTCTCCTAGCCACCTCTTTTACAGCAATCTACAGCTTTCG  
GGTAGTATTCTTTGTCCCATGGGTCATCCACGATTTAACCCTTTCCCCCATTAATG  
AGAACAACCCGGCAGTCATCAACCCACTTAAGCGGTTAGCCTGGGGAAGTATTCTC  
GCAGGACTGCTTATTACCTCTAATATTACGCCTTTAAAGACCCCAGTTATGTCAATA  
CCCCTAACCCTTAAATTAGCCGCTCTTCTGGTCACGATCGTTGGCCTTCTTATTGCC  
TAGAATTGCCATATTAACCAACAAACAATTTAAAGCAACACCCATTCTTACACACA  
CAACTTCTCAAATATACTTGGCTTCTTCCCTGCCATCGTTCACCGCTTAACCCCTAAG  
CTAGCCCTAACTCTTGGCCAAGGTATTGCCAGTCAAATAATGGACCAAACCTGATTA  
GAAAAAACTGGCCCTAAAGCCATCACATCCCTAAGCCTCCCCATAGTTACCATAACA  
AGCAACATCCAACAAGGCATGATTAAACATATCTTTTCTTTTTGTCTAACTCTCGC  
CCTTATAATTGCCATGCTATTTGCCTAATGACCTTTATTATATATTTGATTTTATTTG  
TTTTGTCTAGGTTTAGTTGCGGTTGCTTCTAACCCTCCCCCTACTTTGCTGCCTTAG  
GGTTGGTTGTGGTGGCTGGGATGGGGTGTGGGCTACTAGTTGGGTGTGGAGGGCCTT  
TTTTATCGTTAGTGCTTTTTTTAATTTACTTGGGCGGGATGTTAGTTGTGTTTGCTTAT  
TCAGCAGCATTGGCTGCTGAGCCATACCCCGAGAGTTGAGGGAATCGGGAAGTTTT  
AACTTATGGTACTTTATGCGGGAGGGGTTGTGTAATCTCTGCGTTGTTTTGAGGGGG  
GTGGTATGAGTCTTCATGAGTGTTAGTAGATAATTTAATGAGTTTTCTGTGTTTCGT  
GGGGATGTGGGTGGTGTGCTTTAATATACTCTTCTGGGGGTGGATATTAATTATT  
AGTGCGTGGGTCTTTTTTTAACTCTGTTTGTAGTTTTAGAAATTAACCGGGGTATAAG  
TCGGGGGGCCCTTCGACTGTTT

*Pleuronichthys japonicus\_KY038655*

ATGACACTAAGCCTATTTGACCAATTTGAATCACCTGTACTATTTACATCCCTCTAA  
TTGTACTAGCAATTGCCCTCCCATGAGTACTATTCCCTGCCCTGGACCCGATGAATT  
AGTAACCCCTACTAGCATTTCAGGATGATTTGTAAACACTTCACCTCACAAATT  
CTTCTCCCACTAAATACACCCGGGCATAAATGAGCACTTCTCTTCGCCTCCCTCATCT  
TTTCTTTCTCTATCAATGTGCTCGGGCTTCTTCCTTACACCTTTACACCTACTACTCAA  
CTATCTTTTAACTTAGGACTTGAGTACCCCTCTGACTAGCAACAGTAATTATGGGA  
TGCGCACCCAGCCAACACACGCATTAGGACACCTCTTGCCTGAAGGCACCCCAACT  
GCTTTAATTCCTGTACTCGTTATTATCGAAACAATTAGTCTGTTTATTCGCCCTATTG  
CTCTAGGTGTCCGATTAAACAGCAAACCTAACAGCAGGCCACCTCCTGATTCAACTTA  
TCTCAACAGCTACTTTCGTCTATGCTCCCGATTATGCCTACTGTTGCTATTTTTACCAC  
AACACTTCTGCTTCTTCTTACCCTCCTAGAAATTGCTGTTGCTATAATTACAGGCTTAT  
GTCTTTGTCTTACTCCTAAGCCTTTACCTACAAGAAAACGTCTAATGCCTCAACTCAA  
CCCCGGCCCTTGATTTTTTCATCTTAGCTGTTTTATGACTTTTATTTCTATCTCTCGCAC  
CCCGAGTACTTTTAAATACTCTTCCCTAACAAAATAACACCCGAAGGAAAGTTAG  
AACAAACCATAACCCTGAACCTGACAATGACACTAAGTGGCAATCACACGTTGATT  
CTTCTCAACCAATCACAAAGACATCGGCACCCTCTATCTTGTATTTGGTGCCTGAGC  
CGGAATAGTGGGAACAGCCCTAAGTCTACTCATTCGAGCAGAACTGAGCCAACCCG

GAGCCCTTCTTGGGGACGATCAGATTTATAATGTTATCGTCACTGCACACGCCTTTG  
TAATAATCTTCTTTATAGTAATAACCAATCATGATTGGAGGATTTGGAAACTGGCTTA  
TTCCCCTAATGATTGGGGCGCCTGATATAGCCTTCCCTCGAATAAATAACATGAGCT  
TCTGGCTTCTACCACCATCTTTCCTCCTTCTCCTCGCTTCTTCAGGAGTTGAAGCCGG  
CGCCGGTACAGGGTGGACAGTGTATCCCCCTCTGGCTGGTAACCTGGCACATGCCGG  
AGCATCCGTAGACCTTACAATCTTTTCACTTCACCTCGCAGGAATTTTCGTCAATTCTA  
GGGGCCATCAACTTCATTACTACTATTATTAATAATAAAACCCACGGCTATAACTATA  
TACCAAATCCCCTACTATTTGTTTGAGCCGTACTAATTACAGCTGTTCTACTGCTTCTTT  
CTCTCCAGTTTTAGCCGCTGGTATCACAATGCTTCTAACGGATCGTAACCTCAACA  
CAACTTTCTTTGACCCTGCTGGAGGGGGTGATCCCATTCTTTACCAACATTTATTCTG  
ATTCTTTGGTCACCCGGAAGTGTATATTCTAATTCTCCCAGGTTTCGGAATAATTTCA  
CACATTGTTGCCTATTATGCAGGCCAAAAAGAACCCTTTGGTTACATGGGGATGGTC  
TGAGCTATAATAGCAATTGGCCTCCTTGGATTTATCGTCTGAGCCCACCACATGTTT  
ACGGTTGGCATGGATGTTGACACACGTGCATATTTTACATCCGCCACAATAATTATT  
GCAATTCCCCTACTGGTGTAAGTATTTCAGTTGACTCGCTACACTTCATGGAGGTGAT  
ATTAAATGGGAAACACCCCTACTATGAGCACTTGGTTTTATTTTCCTATTTACAGTGG  
GAGGCCTAACTGGAATTGTTTTAGCTAATTCATCACTAGACATTGTTTTACATGACA  
CATACTATGTCGTAGCCCACTTTCCTACTCGTCTTATCTATGGGTGCTGTCTTCGCCAT  
TGTTGCTGCTTTCGTTCACTGATTCCCCCTATTTACAGGCTATACTCTCCACGAAACA  
TGAATAAAGTTCATTTTGGCGTAATGTTTCGCAGGAGTAAATTTAACATTCTTCCCA  
CAACATTTCTTAGGCCTAGCCGGAATACCCCGACGATACTCAGATTACCCAGATGCC  
TTTACTCTGTGAAACACAGTTTCATCATTTTGGCTCCCTAGTATCCCTAGTTGCCGTAA  
TTATGTTTTTATTTATTATTTGAGAAGCATTTACAGCCAAACGAGAAGTTCAATCGGT  
AGAATAACCGCAACTAATATTGAATGGCTTCACGGCTGCCCCCGCCTTATCACAC  
ATTTGAAGAACCTGCATTTGTTTCAGGTACGCATAGACTAAATGGCCCATCCCCTACA  
ACTTGGATTTCAAGATGCAGCTTCACCACTAATAGAAGAATTACTTCACTTTCACGA  
CCACGCCCTGATAATTGTTATTCTTATTAGCGTAATAGTACTTTACATTATTGTAGCC  
ATGGTTACAGCTCAATTTACGGATAAACTTGTGCTTGACTCCCAAGAAATCGAAATT  
ATCTGAACAATTCTCCCAGCTATTATTCTTATTCTTATTGCCCTACCATCTCTCCGAA  
TTTTATATCTAATAGACGAAATCAACAGCCCCCACCTTACAGTAAAAGCTTTAGGTC  
ACCAGTGGTACTGGAGCTATGAATACACAGACTACGATGACCTTGGCTTTGACTCAT  
ACATAATCCCCACGCAAGATCTCAGCTACGGCCAATTCCGACTTTTAGAAGCAGACC  
ACCGCATAGTAGTCCCTGTAGAATCCCCCGTTTCGAGTTTTAATTACCGCCGAAGACG  
TCCTTCATTTCGTGAGCAGTGCCAGCCCTAGGCACAAAAGTCGATGCTGTTCCGGGAC  
GACTAAACCAAGCAACTTTTACCATTAGCCGGCCAGGCGTATTCTTTGGTCAATGCT  
CTGAAATTTGCGGAGCCAATCACAGCTTCATGCCAATTGTTGTAGAAGCAGTTCCCC  
TTGAACACTTCGAATCCTGATCTTCATTAATAATTGAAGAAGCCTATGGCCCATCAA  
GCACACCCATTTACATAGTCGACCCCAAGCCCTGGCCCTTACAGGTGCCATTGCT  
GCCCTACTAATAACGTCCGGCCTTGCTATCTGATTTCACTTCCACTCTACGACCCTTA  
TAACTTTAGGAACAATTCTTCTTATTTTAAACAGCTTTCCAATGATGGCGAGACGTTGT  
CCGAGAGGGTACCTTTCAAGGTCACCACACCCCAAGTCCAAAAAGGGCTTCGAT  
ATGGTATGATCCTCTTCATTACCTCAGAAGTTCTCTTCTCCTCGGCTTTTTCTGAGCT  
TTTTATCACTCAAGCCTAGCACCCACCCCTGAACTAGGCGGCTTCTGACCACCCGCT  
GGTATTACCCCTTTAGACCCCTTCGAAGTACCCCTACTCAATACAGCAGTCCTTCTTG  
CCTCAGGCGTTACAGTTACATGGGCACACCACAGCATTATAGAAGGGCAACGAAAA  
CAAGCCCTTCAATCCCTCGCACTTACAATTTTACTTGGAGGCTACTTTACCTTCCTCC  
AAGCCCTCGAGTACCATGAAGCCCCCTTACTATTGCAGACGGGGTGTATGGTGCCA  
CATTTTTTGTGGCTACTGGCTTTCACGGCCTCCATGTGTTAATTGGCTCTTCATTTTTA  
GCTGTTTGCTTTCCTCCGCAAGCCCTTCACCATTTTACATCAAACCATCATTTTTGGGT  
TTGAAGCAGCCGCATGGTATTGACATTTTCGTAGACGTCGTCTGACTTTTCCTCTACAT  
CTCCATTTACTGATGAGGATCCTAATGGCCAGCCTACGAAAGTCCCACCCCTTTTA  
AAAATCGCAAACCATGCTTTAGTCGATCTCCCATCCCCCTCCAACATCTCTGTTTGAT



GAAATTTTGGATCCCTTCTAGGACTCTGCTTAATTATCCAAATCGTAACAGGCCTTTT  
CTTAGCCATGCATTATACTTCGGATATCGCAACCGCTTTTACCTCCGTAGCCCACATT  
TGCCGAGACGTCAACTACGGCTGATTAATTCGAAATGTTACGCCAACAGCGCATCA  
TTCTTTTTTATTTGCATCTACCTTCACATTGGCCGAGGCCTCTATTACGGCTCGTACC  
TACAAAAAGAAACATGAAACGTTGGGGTAGTTCTTCTCCTACTCGTCATGATAACAG  
CCTTTGTTGGCTATGTCCTCCCCTGAGGTCAAATGTCATTTTGAGGTGCAACCGTCAT  
TACTAACCTTCTCTCTGCTGTACCCTACGTCGGCAACACCCTAGTTCAATGAATCTGA  
GGGGGATTTTCTGTAGACAATGCTACTCTCACCCGATTCTTTGCATTTCACTTCCTTT  
TCCCCTTTATTATTGCAGCTGCAGCAATCATTCAATTTGCTTTTCTACACGAAACAGG  
CTCAAACAACCCACAGGCCTTAACCTCAGACTCTGACAAAATCCCCTTTCATCCCTA  
TTTTTCGTATAAAGACCTCTTGGAATTCGCCATCCTCCTCACTGCCCTAGCATCCCTTG  
CCCTATTCTCTCAAATCTCTTGGGCGACCCCGACAACCTTCACCCCGCAAACCCAC  
TTGTCACACCCCTCACATTAAGCCAGAATGGTATTTCTGTGTTGCATATGCTATTCT  
ACGCTCTATTCCCTAACAAATTGGGAGGAGTACTTGCTCTATTGTTTTCTATCCTGATC  
CTGATACTTGTACCCCTCCTTCACACATCTAAACAACGAAGTCTAATATTCCGCCCTT  
TCTCGCAATTCCTATTCTGATCCTTAGTAGCAGATGTAATGATCCTTACCTGAATCGG  
GGGCATGCCCGTTGAACACCCCTTTGTTATTATTGGACAAATCGCATCATTTCTCTAC  
TTCTTCCTATTCTGCTGTTAATCCCTTTAACAGGTTGACTGGAGAATAAAGCATTAG  
CTTGAAAATATGATTTTCGACCCTTATTACACATGTTTTTAACCCCTGCTATTCATTG  
TTCTGTATTATTAGCCGTAGCATTCTCACCTTACTTGAGCGTAAAGTTCTTGGCTA  
CATGCAACTCCGAAAAGGACCAAATGTCGTAGGACCCTACGGCCTTCTTCAACCCAT  
CGCCGACGGCATTAAAGCTATTTATTAAAGAGCCCGTACGACCCTCCACCGCTTCTCC  
CGTTCTCTTTATTCTTGCTCCCATGCTCGCACTCACTCTAGCTCTTGCACTTTGAGCCC  
CCATACCTCTCCACACCCCTATGACTGACCTCAACCTCGGCATCTTATTTGTTTTAGC  
ATTGTCCAGCCTTGCAGTTTACTCCATCTTGGGGTCAGGCTGAGCATCAAACCTCAA  
GTATGCACTCATCGGGGCCCTCCGAGCTGTTGCACAACTATTTCTACGAGGTCAG  
CCTAGGCCTCATTTTACTTAATATTATTATTTTTCCGGTAGCTTCACTCTTCAAACCT  
TTAACACAACCCAAGAAGCCATCTGACTAATTGTTCTGCTTGACCTTTAGCTGCCA  
TGTGATATGTTTCTACCCTGGCTGAGACAAACCGGGCACCTTTTGACCTAACAGAGG  
GCGAATCTGAACCTGTTTCCGGATTTAATGTAGAGTATGCAGGCGGACCCTTCGCTT  
TGTTTTTCTGCTGAATACTCTAATATCCTTCTGATGAATACCCTATCTGCAGTATT  
GTTCTTGGGGGCTTCTCATATCCCGACCATGCCAGAATTGACAAGCATTAAATCTTAT  
AACCAAAGCCGCTCTTCTCTCAGTAGTGTTCTGTGGGTTTCGAGCCTCATACCCTCG  
ATTTCTGTTATGACCAACTTATACACCTTACCTGAAAAAGCTTCCCTTCCCCTCACACTC  
GCATTAGTTATTTGACATTTGGCCCTCCCTATTGCATTTGCGGGCCTTCCACCACAAT  
TGTAGATGAATCCTTACATCTTAACCACTCTTCTATTTGGCTTAGGCCTTGGCACAAC  
ACTTACATTTGCAAGCTCCCACTGACTCCTTGCTTGAATGGGCCTTGAAATTAATACT  
CTCGCTATCCTCCCCCTTATAGCCCAACACTACCACCCTCGAGCAGTTGAAGCCACC  
ACTAAATATTTCTCACACAAGCTGCAGCAGCCGCTACCCTTCTTTTGCAACTATA  
ACTAACGCTTGACTTACGGGCCAATGGGATATTCAACAAATGACTCACCCCTCCCA  
ACAACAATAATTATTGTTGCTCTAGCACTAAAAATTGGCCTTGCAACCAGTACACTCC  
TGACTACCAGAAGTTCTTCAAGGCCTAGACCTCACCCTGGACTAATCCTCTCTACT  
TGGCAAAAACCTTGCCCCCTTGCTCTTCTCATGCAAATTCAAACCACAACCCACCC  
CACTTATTATTATGGGCTTGCTTTCTACCTTGGTGGGAGGCTGAGGCGGCCTAAACC  
AAACTCAACTACGCAAAATTCTTGCTTACTCCTCAATTGCCACCTTGGCTGAATAG  
TCTTAATTCTCCAGTTCTCACCTACCCTTACCCTCCTCACACTTCTCACATATATCCTA  
TAACTCTATCAATATTTTTAGTTTTCAAGATAAATAAAGCCACCACCATTAATGCCCT  
TGCTATCTCCTGATCTAAAACCCAGCCCTTACAGCGCTAACCCCTCTTATCCTGCTC  
TCTCTTGGCGGCTTACCCCTCTCACGGGCTTTATACCAAATGACTTATTCTTCAGG  
AGTTTACCAAGCAAGATTTACCTTTCTTGCCACCCTCGCCGCACTTACTGCTCTCCTC  
AGCCTCTACTTCTACTTGCGCCTCTCCTATGCCATAACACTCACCATGTTTCCTAATA  
ATCTTGTAGGTGCAACCCCTGGCGACTCCACAACCTCTCAGCTTACCCTCCCTCTCGC

CACAACTACCACAGCAACTATCCTTCTTCTTCCATTAGCCCCGCTGCTTTAGCACTA  
CTCACCACCTATGAACCTTCTCCTAACTATCGTTACAATCACAGCTCTTCTGTCTATA  
ATTCTCATAATTGTCTCTTTTTGGCTCCCCCAAATGACACCCGATTATGAAAACTTT  
CACCATACGAATGCGGCTTTGACCCCGTAGGTTTCGGCCCGATTACCTTTTTCACTGC  
GATTTTTTCTGATCGCCATCCTCTTTCTTCTCTTTGATCTAGAAATTGCTCTCCTTCTT  
CCTCTCCCCTGAGGGGACCAACTAACATCGCCGTTGTTAACATTTCTGTGAGCCACA  
GGCGTCCTTTCCCTCCTGACCCTTGGCCTCGTGTACGAATGAATTCAAGGGGGCCTA  
GAGTGGGCTGAGTATGCTAATAATCCTTGATCCCAACACTGATGCTAATCCCAACAGC  
TTGACTAACCAAACCAACTTGGTTATGACCAACAACCTTTAACACATAGCTTTTGCAT  
CTCCTTAGTTAGCTTGTATGATTAAAAAACATCTCAGAGACCGGGTGATCCTCACT  
CAACTCATGAATAGCTACCGACCCACTATCAACACCCCTGCTCGTTCTCACATGTTG  
GCTGCTGCCCTTAATAATCCTAGCAAGCCAAAACCACACCACCTCAGAACCAGTTAA  
CCGCCAACGTATATACATCACACTTCTAACCTCCTCCAATTCTTTCTCATCCTAGCAT  
TTAGCGCGACTGAACTAATTATATTTTATGTCATGTTTGAAGCTACCCTCATTCCCAC  
TTTAATTATTATTACACGCTGAGGAAACCAAACAGAGCGTTTAAACGCAGGCACCTA  
CTTCCTCTTCTACACACTAGCGGGCTCATTACCCCTTCTTGTGCGCCCTTCTCCTATTGC  
AAAACACAACAGGTACCTTATCACTTCTAACCCCTCCACTACGCGGACCCTTACAATG  
ATGTCGCACGCAGACAAACTCTGATGAGTAGGCTGCCTCCTCGCCTTCCTAGTTAAA  
ATACCTCTTTATGGAGTACACCTTTGACTCCCCAAAGCACACGTTGAGGCCCCCATT  
GCAGGCTCAATAATTCTTGCAGCCGTCTCCTTAAATTAGGAGGGTATGGAATAATT  
CGTGTAATACCAACCCTGGAACCCCTAACCAAGGAATAAGTTATCCCTTTATTATC  
TTTGCCTCTGGGGTGTATTATAACTGGCTCCATTTGCCTCCGCCAAACCGATCTCA  
AGTCACTAATTGCCTACTCATCTGTAGTCACATAGGCCTTGTGGCAGGAGGAATCC  
TCATCCAATCACCTTGGGGCCTTACAGGTGCACTTACCCTTATAATTGCCACGGCC  
TGACTTCCTCCGCCCTCTTCTGCCTAGCGAATACTAATTATGAACGAACCCACAGCC  
GGACAATGGTCCTAGCACGCGGCCTTCAAATAGCACTTCCTTTAATAGCAACTTGAT  
GGTTTATTGCCAGCCTAGCTAATCTAGCCCTCCCACCTTTACCCAATCTTATAGGAG  
AACTAATAATTATTACCTCTTTATTTAACTGATCTTGATGGACTCTAGCACTTACAGG  
GGCCGGCACCTTAATTACAGCTGCTTATTCCTCTACATATTCCTAATAACCCAGCG  
AGGCCCCCTCCCAACACATATTATAGCACTTAGCCCTCACATACCCGAGAACATCT  
TCTCGTTGCCTTCACCTCGCCCCCTTGGCCCTATTAATTCTCAAACCCGAGCTGATCT  
GACGCTGAACTGCTTATGACCCCTACACATTTTGCCTTTTCCTCAGCCTTTATTTTAG  
GCTTAACAGGCCTGGCATTCCACCGGTCTCATCTACTATCTGCTCTTTTATGCCTTGA  
GGCAATAATACTATCTCTATTTGTTGCCCTTTCCTATGAACACTTCAACTAGATTCC  
ACCAATTTCTCAACGTCACCCATGCTTCTACTCGCATTTTCAGCCTGCGAGGCAGGT  
GCTGGTCTAGCCCTACTAGTTGCTACTGCCCCGACCCATGGGACCGATCGCCTACAA  
AGCCTAACTTACTACAATGCTAAATGCAGCCTACTTCTCTAATGATCTCATCAAGT  
TTAGTTACCATTTTTATGCTGTTAAGCTACCCGTTACTTACTGCACTCCTTCCTACTCC  
TCGAGGTTCCGATTGATCCACCTCTCACGTCAAAACAGCAGTAAAGATAGCCTTTTT  
TGTTAGCCTTCTCCCCCTAGCCCTCTTTTTAAATGAAGGCGCGGAAACAATCGTTAC  
AAATTGGACATGAATAAATACTCACTCCTTCGATATTAGTATCAGTCTAAAATTCGA  
CTTTTACTCAATTATTTTCACACCCATCGCCCTCTATGTAACATGATCCATCCTAGAA  
TTTGCATCCTGGTACATGCACTCTGACCCCTACATAAGCCGTTTCTTTAAATACCTCC  
TTACCTTCCTGATTGCTATAATTATTTTAGTAACCGCAAACAACATATTTCAACTTTT  
TATTGGCTGAGAAGGCGTAGGCATTATATCGTTTCCTCCTTATCGGGTGATGGTATGG  
TCGGACAGATGCCAACACTGCAGCCCTCCAAGCTGTTCTCTACAACCGGGTAGGGG  
ACATCGGACTTATCTTCGCCATGGCTTGAATGGCAACAACTTAAATTCCTGGGAAA  
TACAGCAAGTGTTTCGCAAGCTCCAAAGACATAGACTTGACTTACCCCTCCTCGGGC  
TAATCATTGCAGCCACCGGGAAATCAGCCCAATTTGGGCTCCACCCTTGGCTGCCGT  
CCGCCATGGAGGGCCCCACACCGGTGTCTGCCCTACTTCACTCCAGCACTATGGTCG  
TTGCCGGTATCTTCTTACTGGTGCGAATGAGCCCTCTTCTAGAAAATAACCCTACCG  
CTCTTACAGTCTGCCTGTGCCTCGGAGCCCTAACTACCCTCTTTACCGCCACATGTGC

TTTAACCCAAAACGACATTAAAAAAATCGTTGCATTCTCCACATCAAGCCAACTTGG  
GTTAATAATGGTTACCATCGGCCTAAACCAACCACAGTTAGCATTCCTTCATATTTG  
CACACACGCCTTTTTTAAAGCCATATTATTCTTGTGTTCCGGGTCTATTATTCACAGC  
CTAAACGACGAGCAGGACATCCGAAAAATGGGAGGTATACATCACCTTACGCCCTT  
TACATCTTCATGCCTGACTATCGGGAGCCTCGCCCTTACAGGTACGCCTTTCCTAGCC  
GGCTTCTTCTCAAAGACGCCATTATCGAAGCACTAAACACATCCACCTAAACGCC  
TGAGCCCTCACCCCTCACTCTCCTAGCCACCTCTTTCACAGCAATCTACAGCTTTCGAG  
TAGTATTTTTTTGTTCCCATGGGTTCATCCACGGTTTAACTCCTTTCCTCCCATTAATGAA  
AATAACCCAGCAGTAATCAACCCACTTAAACGCTTAGCCTGGGGAAGTATTCTTGCA  
GGACTGCTTATTACCTCAAATATTACACCTCTAAAAACCCCATTAATGTCAATACCC  
CTAACCCCTTAAATTGGCTGCTCTTATGGTTACAATTGTTGGGCTTCTTATTGCCCTGG  
AACTCGCCGCACTAACCAATAAAACAATTTAAAGCAACACCCATTCTTACACACATAA  
CTTCTCAAATATGCTTGGCTTCTTCCCAGCTATTGTTACCCGCTTAACCCCTAAGCTA  
GCCCTCACCCCTTGGCCAAGGTATTGCCAGTCAAATAATAGACCAAACCTGACTAGA  
AAAGACGGGGCCCTAAAGCCATCACATCTCTAAGCCTCCCATGGTTACCATAACAA  
GCAACATCCAACAAGGCATGATTAAACATATCTTTTCTTTTTATTCTAACTCTTGCC  
CTTATAGTTGCCATACTATTTGTTTAAATGACCTTTATTATATATTTAATTCTATTCTGT  
TTTGTACTAGGTTTAGTCGCGGTTGCTTCTAACCCCTTCTCCTTACTTTGCTGCCTTAG  
GGTTAGTTGTGGTAGCTGGGATGGGGTGTGGAATATTAGTTGGGTGTGGAGGGCCCT  
TTTTATCGCTAGTGCTTTTTTTAAATTTATTTGGGAGGGATATTAGTTGTATTTGCATAT  
TCAGCAGCGTTGGCTGCTGAGCCGTACCCTGAAAGCTGAGGAAATCGGGAAGTTTT  
AACTTATGGTACTTTATGCGGGTGGGGTGTGTAAATTTCTGCGTTGTTTTGAGGGGG  
GTGGTATGAGTCGTCGTGGGTGCTAGTAGATAACTTCAATGAGTTTTCTGTGTTCCG  
TGGGGATATGGGCGGTGTTGCTGTAATATACTCTTCTGGGGGTGAATGTTAATTAT  
TAGTGCGTGGGTTCTCTTTCTAACTCTGTTTGTGGTTCTAGAATTAACCGGGGTATAA  
GTCGAGGGACCCTCCGACTGTCT

*Pseudopleuronectes\_herzensteini*\_MW713061

ATGATACTAAGCTTCTTTGACCAATTTATGTCCCCCGTATTCCTGGGCATCCCACTAA  
TTGCACTAGCAATTACACTGCCTTGAACGCTCTTTCCAGCCCCCGTATTCGCTGACTA  
AACAACCGCCTAATCTCGCTCCAAGGGTGATTTATTAGCGGCTTTACCTCACAACCTT  
CTTCTTCCCCTAAATCCCGGAGGCCACAAATGAGCACTTCTATTCGCCTCGCTAATCT  
TTTCTCTTTCTATTAACATGCTTGGCCTCCTTCCGTACACATTTACACCTACCACTCA  
ACTCTCGCTTAACCTCGGCCTTGCAGTCCCCTCTGGCTGGCAACTGTCATCATGGT  
ATGCGAAACCAACCAACAATCGCCTTAGGCCACCTTCTTCCAGAAGGGACTCCTACC  
CTCCTGATCCCCGTAATAATTATTATCGAAACAATTAGCCTATTTATTTCGACCCCTTG  
CTCTGGGGGTCCGACTTACAGCTAACCTCACAGCGGGCCACCTCCTCATCCAACCTCA  
TTGCAACAGCTGCCTTCGTTCTTCTCCCGCTTATACCTGTTGTTGCTATTTTAAACAAC  
AACGGTTCTCTTCTCCTCACTCTTCTCGAAGTTGCCGTTGCTATAATTCAAGCCTAT  
GTCTTTGTCCTACTTCTAAGTCTTTACCTACAAGAAAACGTTTAAATGCCTCAACTGAA  
CCCCGCACCCTGATTTGCAATTTTGGTTTTCTCTTGAATAATCCTTTTAACTGTCATTC  
CCCCAAAAGTTTTAGCTCACACTTACCCCAATGAGCCAACCTCCCCAAAGCACACAAA  
AACAAAACAGAACCCTGAAACTGACCATGATACTAAGTGGCAATCACACGTTGATT  
TTTCTCGACCAATCACAAAGACATCGGCACCCTCTATCTTGTATTTGGTGCCTGAGC  
CGGAATAGTGGGGACAGGCCCTAAGTCTGCTCATTGAGCAGAGCTAAGCCAACCTG  
GGGCTCTCCTGGGAGACGACCAAAATTTATAACGTAATCGTCACCGCACACGCCTTTG  
TAATAATCTTCTTTATAGTAATAACCAATTATGATCGGAGGGTTCGGAAACTGACTTA  
TTCCATTAATAATTGGGGCCCCCGATATGGCCTTCCCTCGAATAAATAACATGAGCT  
TCTGACTTCTACCCCCATCCTTTCTCCTTCTTCTAGCCTCTTCAGGCGTTCGAAGCCGG  
GGCGGGGACAGGATGAACCGTGTACCCCCCACTAGCTGGAAATCTAGCACACGCCG  
GAGCATCCGTAGACCTCACCATTTTCTCTCTTTCATCTTGCCGGAATTTCTTCAATTCT  
AGGGGCAATCAACTTTATTACCACTATCATCAATATGAAACCAACAGCAGTCACTAT  
GTACCAAATCCCCTACTTTGTCTGGGCCGTACTAATCACCGCCGTCCTTCTTCTTCTT

TCCCTACCCGTTCTGGCCGCTGGCATCACAAATGCTACTGACAGACCGCAACCTAAAC  
ACAACCTTTCTTTGACCCTGCCGGAGGGGGTGACCCCATCCTTTACCAACACCTATTC  
TGGTTCTTTGGCCATCCAGAAGTCTACATTTTAAATTCTCCCAGGCTTCGGGATGATTT  
CTCACATTGTTGCATACTATGCAGGTAAGAAAGAACCCTTTGGCTACATGGGGATGG  
TCTGAGCTATAATGGCTATCGGACTCCTGGGCTTCATTGTATGGGCCCATCACATGT  
TCACAGTCGGAATAGATGTGGACACACGGGCCTATTTTACCTCTGCCACAATAATTA  
TTGCCATCCCAACCGGCGTAAAAGTCTTTAGCTGACTCGCAACCCTTCATGGAGGAA  
GCATTAAATGAGAAACCCCACTCCTGTGGGCCCTAGGCTTTATTTTCCTATTACAG  
TGGGGGGTCTTACTGGTATTGTCTTAGCTAACTCGTCTCTTGACATTGTCCTTCATGA  
CACATACTATGTAGTAGCCCACTTCCATTATGTCTTATCTATGGGGGCTGTCTTTGCG  
ATCGTTGCCGCCTTCGTACACTGATTCCCACTATTTACAGGCTATACCCTCCACTCCA  
CATGAACGAAAGTCCACTTTGGCCTAATGTTTGTGGGGGTCAACCTCACATTCTTCC  
CCCAACATTTTCTGGGTCTCGCCGGAATGCCTCGACGGTATTCAGACTACCCGGACG  
CATACACCCTTTGAAATACTGTCTCATCGATCGGCTCACTAATGTGCTCGTCGCTGT  
GATTTTATTTTTGTTTATTATTTGAGAAGCATTTACGGCCAAACGAGAAGTCGGCGC  
AGTAGAACTAACTTCAACTAACATTGAATGACTTTACGGCTGCCCTCCACCCTACCA  
CACATTTGAGGAGCCCGCATTTCGTTCAAGTTCGTATAAACTAAATGGCACATCCATC  
ACAACCTGGGATTTACAGGACGCAGCTTCCCCCCTTATAGAAGAACTACTTCACTTCCA  
TGACCACGCCTTAATAATTGTTATTCTCATCAGCACCATGGTACTTTATATTATTGTG  
GCTATGGTCACGGCCCACTAACCGATAAGCTTGTGTTAGACTCTCAAGAAATTGAA  
GTTATCTGAACAGTTCTCCCAGCTATTATTCTTATTCTCATCGCCCTCCCATCTCTCC  
GAATTTTATACTTAATAGACGAAATTAACGACCCCCACCTGACAATTAAGCCTTAG  
GACACCAATGATACTGAAGCTACGAATACACAGACTACCAGGACCTCGGTTTTGAC  
TCTTACATGGTCCCAACTCAAGACCTAACCCCGGGCAATTCCGACTACTAGAAGCA  
GACCACCGAATGGTAATTCCTGTAGAATCTCCAATTCGAGTTCTTATCTCAGCTGAG  
GATGTCTTGCACTCATGAGCAGTCCCCTCCCTGGGTGTAAAAGTAGACGCCGTGCCT  
GGACGATTAAACCAGGCAACCTTTATTGTTAGCCGACCCGGCGTATTCTATGGCCAA  
TGCTCTGAAATTTGCGGGGCAAACCACAGCTTTATGCCCATCGTTGTAGAGGCAGTA  
CCACTTGACCCTTTGAGAACTGGTCTTCGCTAATAATTGAAGACGCCTATGGCCCC  
TCAAGCACACCCGTACCACATAGTCGACCCGAGCCCATGACCCCTCACGGGGGCTA  
TTGCTGCCCTATTGATAACATCTGGCCTTGCTATCTGATTCCACTTTCCTCCACAAC  
CCTAATAACTATTGGAACCATCCTTCTCATTCTAACAGTCTTTCAATGATGACGAGA  
CGTCGTCCGAGAAGGAACATTTCAAGGACACCACACCCCTCCCGTTCAAAAAGGCC  
TCCGATACGGAATAATCCTATTTATTACATCAGAAGTCCTATTTTTCTTAGGCTTCTT  
CTGAGCCTTTTACCCTCAAGCCTAGCACCCACCCCGACCTAGGAGGCTTCTGACC  
ACCGGCAGGCATCACACCTTTAGACCCATTTCGAAGTCCCACTTCTAAACACAGCAGT  
ACTGCTTGCTCCGGCGTAACCTGTACATGGGCACATCACAGCATCATAGAAGGTAA  
ACGAAAACAAGCTATTCAGTCTCTCGCTTTAACAATCTTGCTCGGAGGGTATTTAC  
CTTCCTCCAAGGCCTTGAGTATCACGAAGCCCCCTTACCATCGCAGACGGGGTTTA  
CGGTGCCACATTCTTTGTTGCCACCGGCTTCCACGGACTTCACGTCTTAGTTGGTTCA  
TCTTTCTTAGCCGTTTGTCTACTACGCCAAATTCTCCACCATTTTACATCAGACCACC  
ACTTTGGATTTGAAGCAGCCGCATGATACTGACACTTCGTAGACGTCGTCTGACTCT  
TCCTCTATATCTCTATTTACTGATGAGGATCTTAATGGCCAATCTCCGTAAATCCCAC  
CCCCTTCTTAAATCGCAAACGATGCTTTAGTCGACCTCCCAGCCCCCTCCAACATTT  
CTGTCTGATGAACTTTGGGTCTCTTTTAGGACTCTGCTTAGTAACCCAGATCGCTAC  
CGGCTTATTTTLAGCCATACACTACACATCAGATATTGCTACTGCCTTCACCTCCGTT  
GCCACATCTGCCGGGACGTCAACTACGGCTGACTTATCCGAAGCATTATGCCAAT  
GGCGCATCATTCTTTTTTATTTGTATCTACCTTCACATCGGTTCGGGGTCTCTACTACG  
GCTCCTACCTCTACAAGGAAACATGAACTATTGGAGTCGTAAGTCTACTCCTCGTAA  
TGATAACCGCTTTCGTCCGATAACGTTCTCCCTTGAGGACAGATGTCGTTTTGAGGTG  
CAACCGTCATTACCAACCTACTATCTGCCGTCCCTTATGTTGGGGGCACCCTTGTTCA  
ATGGATTTGAGGTGGTTTTTCTGTAGACAATGCCACCCTCACCCGGTTCTTTGCATTC

CACTTCCTCTTCCCGTTCATTATCGCAGCCGCAACAGTTATTCACCTTCTTTTTCTCCA  
CGAAACTGGTTCAAACAACCCCAACCGGCTTAAACTCGGACTCCGATAAAGTCCCATT  
CCACCCCTACTTCACATACAAAGACCTCTTGGCTTCGCGGTCTTCTGACTGCACTA  
GCCTCGCTCGCTCTGTTTTCCCGAACCTTTTGGGAGACCCAGACAACCTTTACCCCG  
CAAACCCCTTGTTACACCCCTCACATCAAGCCAGAGTGATATTTCTCTTTGCCTA  
CGCCATTCTCCGCTCCATTCCAAACAAGCTTGGTGGTGTACTTGCCCTTCTATTCTCC  
ATCCTAGTTCTTATGCTCGTTCCCTTTCTCCACACATCTAAGCAACGAAGCTTGATGT  
TTCGTCTGTGACACAATTCCTGTTCTGGTCTTTAGTAGCCGACGTAATAATTCTGAC  
TTGAATTGGAGGAATACCCGTTGAACACCCCTTCGTAATCATTGGCCAAGTAGCATC  
CCTCATCTACTTCTCCCTTTTCTGGTCCCTAATCCCTACAGCAGGCTGAATGGAAAAC  
AAAGTCCTTGGATGAAAATATGATTTCAACCCTCATTACGCATATTATTAACCCACT  
AGCCTTTATTGTACCCGTTTTGCTAGCCGTAGCATTCTCACCTCCTTGAACGAAAA  
GTGCTAGGCTATATACAACTCCGAAAAGGGCCTAACATCGTAGGGCCTTACGGCCTC  
CTTCAACCCATTGCTGACGGGGTAAACTGTTTATCAAAGAACCCGTCCGCCCTTCA  
ACCGCCTCGCCTGTTCTGTTCTCGTAGCCCCCATGCTCGCACTCACCTTAGCCCTTA  
CACTTTGAGCCCCCATACCTTTTCCCTACCCTGTTGTTGACCTCAACCTAGGTATCTT  
GTTTCATCCTGGCACTATCTAGCCTTGCGGTTTATTCCATCCTCGGATCAGGATGAGCC  
TCCAATTCAAAATATGCCCTGGTGGGTGCACTACGGGCTGTTGCCAGACGATTTCT  
TACGAGGTGAGCCTTGGACTCATTTTACTTAACATCATTATCTTTACAGGAGGCTTC  
ACACTTCAGACCTTTAATACAGCCCAAGAGGCCATCTGACTGGTCGTGCCCGCCTGA  
CCCCTAGCTGCCATGTGATACATTTCTACCCTTGCCGAAACAAACCGCGCGCCCTTC  
GATCTAACAGAAGGGGAATCTGAACTTGTCTCAGGCTTCAACGTAGAATATGCAGG  
GGGACCCTTCGCTTTGTTCTTCTTAGCTGAATACTCCAACATTCTCCTGATAAATGCC  
CTATCCGCAACACTATTTCTGGGCGCCTCCACATTCCGTCCATCCAGAATTAACC  
AGCATTAATATTATAACGAAAGCAGCCCTTCTCTCAGTCGTCTTCTCTGGGTTCTGA  
GCCTCTTACCCACGATTCCGTTACGACCAACTCATACCTCATTTGAAAAAATTTCT  
CTTCCACTTACACTAGCCCTGGTTATTTGACACTTAGCGCTCCCTATCGCATTTCGCTG  
GTCTTCCACCACAACCTATAAATGAACCCCTACATCTTGACCACCCTTCTATTTGGTTT  
AGGCCTAGGTACAACACTCACATTTGCAAGCTCGCACTGACTTCTCGCTTGAATGGG  
CCTCGAAATCAATACACTGGCCATTATTCCACTAATAGCCCAACATCACCACCCACG  
GGCAGTTGAAGCAACTACTAAATACTTCCCTAGCACAAAGCCACAGCGGCCGCCACGC  
TCCTGTTTGCAAGCACAAACCAACGCTTGACTTACCGGCCAGTGGGATATCCAACAAA  
TAACACACCCGCTCCCCACAACAATAATTGTCATTGCCCTAGCACTAAAAATTGGAC  
TAGCACCAATGCACTCTTGACTCCCCGAGGTTCTTCAGGGCCTAGATCTTACCACCG  
GGTTAATTCTATCCACATGACAGAAGCTTGCCCCCTTTGCTCTCTTACTACAAATTCA  
AACAACAACCCTACCCCCCTAATCATTATCGGCTTACTTTCTGCCCTTGTGCGTGGGT  
GAGGCGGCCTCAACCAACACAACCTGCGTAAAGTCCTTGCCTACTCCTCAATTGCTC  
ACCTTGGGTGAATAATACTGATCCTTCAATTTTCACCATTGCTGAGCCTCCTCGCACT  
CCTCACATACTTCCCATGACCTTTTCAGCATTCTCATCTTCAAAGTGAACAAAGCC  
ACCACTGTTAATGCACTCGCGATCTCCTGAGCAAAAACCCCGCCCTCACAGCCCTC  
GCCCCCTTGTATTACTTTCCCTCGGCGGCCTTCCGCCGCTTACCGGCTTCATACCCA  
AATGATTCATTCTCCAAGAGCTCACTAAACAAGATCTCCCACCCTCGCCACAGTTGC  
TGCATTAACAGCCCTATTAAGCCTTTACTTCTACCTTCGTCTCTCGTATGCAATAACC  
CTAACGATATTCCCTAATAACCTCGTTGGTGTAGCCCCCTGACGATTCTATTCCCCC  
AATTTACCCTCCCCCTAGCCGTCTCTACCACAGCAACCACCCTTCTTCTGCCGCTTGC  
CCCTGCTGCTGTGGCACTCCTCATCACCTATGAGCCTTCTTCTAACCATCATTTCAT  
TACCGCCCTCCTCTCAACGGTACTTGCCATTGTGTCTTTTGTACTCCCCAAATCACA  
CCAGACCACGAGAACTATCACCATACGAATGTGGCTTCGACCCCATAGGTTCCGCC  
CGATTACCTTTCTCGCTGCGATTTTTTCTCATTGCAATCCTTTTTCTTCTCTCGACTT  
AGAAATTGCACTTCTTCTCCCCCTCCCATGAGGGGACCAACTAGCATCCCCTCTGCT  
TACATTCACCTGAGCTACAGCTGTTCTATCCCTTCTAACCCTCGGCCTCATTTACGAA  
TGAATGCAGGGAGGCCTTGAATGGGCTGAATATGCTAAAAATTCTAATCCCAACAC

TCATGCTAATCCCAACAGCCTGACTACTCAAACCTAGCTGGCTGTGGCCCATAACTT  
TGTTATATAGCTTTTGTATCTCCCTGATTAGCCTTTCGTGATTAATAAATCTCTCGGA  
AACCGGCTGATCCTCACTCAACCTATTTATAGCTACCGACGCCCTGTCAACACCCCT  
CCTAGTTCTTACATGCTGGCTCCTCCCACTAATGATCTTGGCAAGCCAGAAACATAC  
AGCCTCAGAACCACTGGGTCGGCAACGTATGTACATCACACTTCTCGCCTCCTTCAG  
TTTTTCTGATTCTAGCATTTAGCGCCACTGAACTCGTAATATTCTACGTAATATTTG  
AAGCAACCCTGATCCCCACACTTATTATTATTACCCGCTGAGGTAACCAAACAGAAC  
GCCTAAATGCAGGGACCTACTTCCTCTTCTATACACTAGCAGGTTCACTCCCTCTTCT  
TGTTGCCCTGCTCTTGCTCCAAAACACATCAGGGACCCTCTCACTATTGACCCTCCAT  
TACGGGGATCCTCTAACTATCAACTTATGCAGACAAATTATGGTGAGCAGGCTGCCT  
TCTAGCCTTCCTGGTTAAATGCCACTTTACGGTGTTCACCTATGACTTCCTAAAGCA  
CACGTCGAAGCCCCAATTGCAGGCTCAATAATCCTTGCAGCAGTTCTCCTTAAACTA  
GGGGGTTACGGCATAATCCGCATGATAACAATGCTTGAGCCTCTAACTAAGGA  
AAGCTACCCCTTCATTGTCTTTGCACTTTGGGGTGTAATTATAACTGGTTCAATTTGT  
CTACGCCAAACAGACCTTAAATCTCTAATTGCCTATTCATCTGTAAGTCACATGGGC  
CTGGTAGCCGGGGGAATTCTCATCCAATCTCCTTGAGGACTCACGGGGGCACTTACA  
CTTATAATTGCTCATGGTCTGACCTCCTCAGCCCTGTTCTGCCTAGCAAACACAACT  
ATGAGCGGACTCACAGCCGTACAATAGTCCTGGCACGAGGGCTTCAAGTGGCACTA  
CCCCTGATGGCCACTTGATGATTTATCTCCAGCCTAGCCAACCTGGCCTTGCCACCA  
CTACCCAACCTTATGGGAGAACTAATGATTATTACTTCTCTTTTTAACTGATCCTGGT  
GAACCCTAGCATTAAACGGGGTCCGGCACTCTTATTACAGCCGGTTACAGCCTCTACA  
TATTCTTAATAACTCAACGAGGCCCCCTCCCAACGCACGTAATTGCACTCGAACCAT  
CACACACCCGAGAACACCTTCTTATTGCCTTCATCTTATTCTCTCATTCTCCTTGTG  
CTTAAGCCCGAGCTGATCTGAGGTTGGACTGCCTATGACCCCCACACACTTTGCCTT  
CTCCTCAGCCTTTTTTCTAGGTTTAACAGGCCTGGCATTCCACCGGTTCCACCTCCTC  
TCCGCCCTATTGTGCCTTGAAGGGATAATACTATCTCTATTTGTTGCCCTCTCCTTGT  
GAACACTCCAACCTAGACTCAACTAACTTTTCAGCATCTCCTATGCTCCTCCTTGCATT  
TTCAGCCTGCGAAGCAAGCGCCGGGCTCGCTCTTCTGGTCGCCACTGCCCCGAACCCA  
CGGAACTGACCGACTACAAAGCCTAAATCTCCTCCAATGCTAAATGCACCCACCTC  
CCTAATGATCTCATCAAGCTTGGTTACAATCTTTGCATTACTAGCCTACCCTCTGATC  
ACCACGATTCGTCCACACCCCGAGGGCCTCAATGAGCAACATCTCATGTCAAGAC  
AGCTGTAAAAATAGCTTTCTTTGTCAGCCTCTTACCCCTCGCCCTATTCCTAAACGAG  
GGTGCCGAGACAATCGTCACTAATTGAACCTGGATAAACTAATACTTTGACATC  
AACATTAGCCTAAAATTTGACTTTTATTCGATTATTTTTACACCCATCGCCCTCTATG  
TACTTGATCCATTCTGGAATTTGCATCATGGTACATGCACGCCGATCCAAACGTGA  
ACCGCTTTTTTAAGTATCTTCTGACATTTTTAATTGCCATAATCATTCTAGTAACCGC  
AAACAACATGTTTCAACTCTTTATTGGTTGAGAAGGCGTCGGGATCATGTCAATTCCT  
CCTCATCGGCTGGTGATACGGACGGGGCCGACGCTAACACTGCGGCACTTCAAGCGG  
TTCTGTATAACCGGGTCGGGGACATCGGACTTATCTTCGCCATAGCTTGAATAGCAA  
CAAACCTGAACTCCTGAGAAATAACAACAAATTTTTGCAACTTCCAAAGACATAGACT  
TAACCTACCCCTCCTCGGACTAATCGTTGCAGCAACTGGGAAATCAGCTCAGTTTG  
GACTTCACCCTTGACTCCCCCTCCGCTATGGAGGGTCTACACCGGTATCTGCCCTACT  
TCATTCTAGCACTATGGTCGTCGCCGGCATTTTCCTGCTAGTCCGGATGAGTCCGCTC  
CTGGAAAATAACCCGACTGCCCTCACAACCTGTCTTTGCCTCGGGGCTCTCACGACA  
CTATTTACTGCAACTTGTGCCCTTACCCAGAATGACATTAAAAAATCGTCGCATTTC  
TCTACATCCAGCCAGCTTGGACTCATGATGGTAACCATCGGACTAAACCAACCTCAA  
CTAGCATTTCTTCACATCTGTACACATGCCTTCTTTAAAGCCATGCTATTTCTCTGCT  
CGGGGTCTATTATTCATAGCCTAAACGACGAACAAGACATCCGAAAAATAGGAGGG  
ATACACCACCTTGCACCTTTCACCTCATCTTGTCTAACAATTGGCAGCCTCGCACTTA  
CGGGAACCCCTTCTTAGCCGGTTTCTTCTCCAAAGATGCCATCATCGAAGCATTA  
ACACATCCACCTAAACGCCTGAGCCCTTACCCTTACCCTCCTGGCCACATCTTTTAC  
AGCAATCTACAGCTTCGAGTAATTTTCTTTGTGCCCATGGGCCATCCCCGATTTAGC

CCATCTCCCCTATTAACGAAAACAACCCAGCAGTAATTAATCCGCTCAAACGACTAG  
CATGGGGCAGTATCATCGCAGGACTACTAATCACCTCAAATATCACACCCCTAAAA  
ACACCTGTTATGTCCATGCCGCCCTTCTGAAACTAGCCGCCCTGGCAGTTACGATC  
GTAGGCCTACTGGTTGCCATAGAACTTGCCATACTAACCAACAAACAATTTAAATCA  
ACCCCCATCTTAACGTACACAACTTCTCCAACATACTAGGCTTCTTCCCTGCCATTGT  
GCACCGCCTGACCCCTAAGTTAGGGCTCGTTCTCGGCCAAGACATTGCCAACCAAAT  
AGTAGACCAAACCTGACTAGAAAAAGCAGGCCCCAAAGCCATTGTATCCTCCAACC  
TCCCCCTAGTCTCTTCTACAAGTAATATTCAGCGAGGAATAATCAAGACATACCTAC  
TCTCTTCCTTTTTAACACTAGCCCTTATAATCCCAACACTCATCCCCTAATGACTTTTG  
TTATATATTTAGTTTTATTTTCTCTTGTGTTGGGGTTGGTTGCAGTTGCTTCTAACCCG  
TCCCCCTACTTTGCTGCTTTAGGGTTGGTTGTGGTAGCTGGGATGGGGTGTGGTATTT  
TAGTCGGGCACGGGGGGCCCTTTTTGTCTGTTAGTTCTCTTTCTAATTTACTTAGGCGG  
GATACTAGTTGTATTTGCATACTCAGCAGCGTTAGCTGCTGAGCCGTACCCGGAAAG  
CTGGGGTAGCTGGTCGGTAATAGTTTACGGTTGTTTATGTGGCAGGGGTAGTGTAGT  
CTCTGCGTTGTTCTGAGGGGGGTGATATGAATCGTCTTGGGTCTTGGTAGATGAGTT  
GGCGGAGTTTTCTGTGTTCCGAGGCGATATTGGAGGGGTAGCTTTAATGTACTCTTC  
TGGGGGGTGATTGTTAATTATTAGTGCCTGGGTGTTACTTCTTACGTTGTTTGTGGTC  
CTTGAGTTAACC CGGTTTAAGCCGAGGGGCGTTGCGACGGTTT

*Pseudopleuronectes yokohamae* KT224485

ATGATACTAAGCTTCTTTGACCAATTTATGTCCCCCGTATTCCTGGGCATCCCCTAA  
TTGCACTAGCAATTACACTGCCTTGAACACTTTTCCCAGCCCCCGTATCCGTTGATTA  
AACAACCGCCTAATCTCCCTTCAAGGCTGGTTTATTAGCGGCTTTACCTCACAATC  
CTTCTTCCGCTAAACCCGGGAGGCCACAAATGAGCGCTTCTATTCGCCTCGCTAATC  
TTTTCTTTTTCTATTAACATGCTCGGACTCCTTCCGTACACATTTACACCTACCACCC  
AACTCTCACTCAACCTCGGGCTTGCAGTCCCCTCTGATTGGCAACTGTCATCATGG  
TATGCGGAACCAACCAACAATTGCTTTAGGCCACCTTCTTCCAGAAGGAACCTCCTAC  
CCTCCTGATCCCAGTACTAATTATCATCGAAACAATTAGCCTATTTATTCGACCCCTT  
GCTCTTGGTGTCCGACTTACAGCAAACCTCACAGCAGGCCATCTCCTCATTTCAGCTC  
ATTGCAACAGCTGCCTTCGTCCTTCTCCCGCTTATACCTGTTGTTGCTATTTTAAACA  
CAACGGTTCTTTTCTCCTCACTCTTCTGGAAGTTGCCGTTGCTATAATTCAAGCCTA  
TGTCTTTGTTCTACTTCTAAGTCTTTACCTACAAGAAAACGTTTAATGCCTCAACTAA  
ACCCCGCACCCCTGATTTGCAATTTTGGTTTTCTCTTGAATAATCCTTTTAACTGTCAT  
TCCCCCAAAGTTTTAGCTCACACTTACCCTAATGAGCCAACCTCCCAAAGCACACA  
AAAACAAAACAGAACCCTGAAACTGACCATGATACTAAGTGGCAATCACACGTTGA  
TTTTTCTCGACCAATCACAAAGACATCGGCACCCTCTATCTTGTATTTGGTGCCTGAG  
CCGGAATAGTGGGAACAGGCCTAAGTCTGCTCATTTCGAGCAGAGCTAAGCCAACCC  
GGGGCTCTCCTGGGAGACGACCAAATTTATAACGTAATCGTCACCGCACACGCCTTT  
GTAATAATCTTCTTTATAGTAATACCAATTATGATCGGAGGGTTCGGAAACTGACTT  
ATTCCATTAATAATTGGGGCCCCCGATATGGCCTTCCCTCGAATAAATAACATGAGC  
TTCTGACTTCTACCCCCGTCCTTTCTCCTCCTTCTAGCCTCTTCAGGCGTTGAAGCTG  
GGGCAGGAACAGGATGAACCGTGTATCCCCCACTAGCTGGAAATCTAGCACACGCC  
GGAGCATCAGTAGACCTCACCATTTTCTCACTTCACCTTGCCGGAATTTTCATCAATTC  
TAGGGGCAATCAACTTTATTACTACCATCATCAACATGAAACCAACAGCAGTCACTA  
TGTACCAAATCCCCTATTTGTCTGGGCGGTACTAATCACCGCCGTTCTTCTTCTTCT  
TTCCCTACCCGTCCTGGCCGCTGGCATTACAATGCTGCTGACAGACCGCAACCTAAA  
CACAACTTCTTTGACCCTGCCGGAGGGGGTGACCCCATCCTCTACCAACACCTATT  
CTGGTTCTTTGGTCATCCAGAAGTTTACATTTTAATTCTTCCAGGCTTCGGGATGATT  
TCTCACATTGTTGCATATTATGCAGGTAAGAAAGAACCCTTTGGTTACATAGGAATA  
GTCTGGGCTATGATGGCTATCGGACTCCTGGGATTCATTGTATGAGCCCACCACATG  
TTTACAGTCGGAATAGATGTGGACACACGAGCCTATTTTACCTCTGCCACAATAATT  
ATTGCCATTCCAACCGGCGTAAAAGTTTTTAGCTGACTCGCAACCCTTCATGGAGGA  
AGCATTAAATGAGAAACCCCACTCCTGTGGGGCCCTAGGCTTTATTTTCCTATTTACA

GTGGGAGGTCTTACTGGTATTGTCTTAGCTAACTCGTCTCTTGACATTGTGCTTCATG  
ACACATACTATGTAGTAGCCCACTTCCACTATGTCTTATCTATGGGGGCTGTATTTGC  
AATCGTTGCCGCTTTTCGTACACTGATTCCCCCTATTTACAGGCTATACTCTCCACTCC  
ACATGAACAAAAATTCACTTTGGCCTAATGTTTGTAGGGGTAAACCTCACATTCTTC  
CCCCAACATTTCTGGGTCTCGCCGGAATGCCTCGGCGATATTCAGACTACCCGGAC  
GCATACACCCTTTGAAATACTGTCTCATCGATCGGCTCACTAATGTCTGCTCGTCGCT  
GTGATTTTATTTTTGTTTATTATTTGAGAAGCATTTACGGCCAAACGAGAAGTCGGG  
GCAGTAGAACTAACTTCAACTAATATTGAATGACTTTACGGCTGCCCTCCACCTTAC  
CACACATTTGAGGAGCCCGCATTCGTTCAAGTTTCGTATAAAATAAATGGCACATCCA  
TCACAACCTGGGATTTTCAGGACGCGAGCTTCCCCCTTATAGAAGAACTACTTCACTTC  
CATGACCACGCCTTAATAATTGTCATTCTCATCAGCACAAATGGTACTTTATATCATTG  
TGGCAATGGTCACGGCCCAACTAACCGATAAGCTTGTGTTAGACTCTCAAGAAATTG  
AAGTTATCTGAACAGTTCTCCAGCTATTATTCTTATTCTCATCGCCCTCCCGTCTCT  
CCGAATTTTATACCTAATAGACGAAATTAATGATCCTCACCTGACAATTAAAGCCTT  
AGGTCACCAATGATACTGAAGCTACGAATACACAGACTACCAAGACCTCGGTTTTG  
ACTCCTACATGGTCCCAACTCAAGACCTAACCCCCGGACAATTCCGACTACTAGAAG  
CAGACCACCGAATGGTAATTCCTGTAGAATCTCCAATTCGGGTTCTTATCTCAGCTG  
AAGATGTCTTGCATTCATGAGCAGTCCCCTCCCTGGGCGTAAAAGTAGACGCCGTAC  
CTGGACGATTAAACCAAGCAACCTTTATTGTTAGCCGACCCGGCGTATTCTATGGTC  
AATGCTCTGAAATTTGCGGGGCAAACCACAGCTTTATGCCCGTCGTTGTAGAGGCAG  
TCCCCTTGACCCTTTGAGAAGTGGTCTTCGCTAATAATTGAAGACGCCTATGGCC  
CCTCAAGCACACCCATAACCACATAGTCGACCCGAGCCCATGACCCCTCACGGGGGC  
TATTGCTGCCCTATTGATAACATCTGGCCTTGCTATCTGATTCCACTTTCACTCCACA  
ACCCTAATAACTATTGGAACAATCCTTCTCACTCTAACAGTCTTTCAATGATGACGA  
GACGTCGTTTCGAGAAGGGACATTTCAAGGACACCACACCCCTCCCGTTCAAAAAGG  
CCTCCGGTACGGAATAATTCTATTTATTACATCAGAAGTCCTATTCTTCCTAGGCTTC  
TTCTGAGCCTTTTACCCTCAAGCCTAGCACCCACTCCCGACCTAGGGGGGCTTTTGA  
CCACCAGCAGGCATCACACCTTTAGACCCCTTCGAAGTCCCGCTTCTAAACACAGCA  
GTACTGCTTGCCTCAGGCGTAAGTGTACATGGGCACATCACAGCATCATAGAAGGT  
AAACGAAAACAAGCTATTCAATCTCTCGCCCTAACAATCTTACTCGGGGGGATACTTC  
ACCTTCCTCCAAGGCCTTGAGTACCACGAAGCCCCCTTCACCATCGCAGACGGGGTT  
TACGGTGCTACATTCTTTGTTGCCACCGGCTTCCACGGACTTCACGTCTTAATTGGGT  
CATCTTTCTAGCCGTTTGTCTACTACGCCAAATTCTCCACCACTTTACATCAGACCA  
CCACTTTGGGTTTGAAGCAGCCGCATGATACTGACACTTCGTAGACGTCGTCTGACT  
CTTCCTCTATATCTCTATTTACTGATGAGGATCTTAATGGCCAATCTCCGTAAATCTC  
ACCCCTTCTTAAAATCGCAAACGATGCTTTAGTCGACCTCCAGCCCCCTCGAACA  
TTTCTGTCTGATGAACTTTGGGTCTCTTTTAGGACTCTGCCTAGTGACCCAAATCGC  
TACCGGCTTATTTTTAGCCATACACTACACATCGGATATTGCTACTGCCTTCACCTCC  
GTTGCACACATCTGCCGGGACGTCAACTACGGCTGACTTATCCGAAGCATCCATGCC  
AATGGCGCATCATTCTTTTTTATCTGTATCTACCTTCACATCGGCCGGGGTCTCTACT  
ACGGCTCCTACCTATACAAAGAAACATGAACCATCGGGGTCGTCTGCTGCTCCTTG  
TAATGATAACCGCTTTCGTCTGGATACGTCCTCCCTTGAGGACAAATGTCATTTTGA  
GTGCAACCGTCATTACCAACCTACTATCTGCAGTACCTTATGTTGGAGGTACTCTTGT  
CCAGTGAATTTGAGGTGGCTTTTCTGTAGATAATGCCACCCTCACTCGGTTCTTTGCG  
TTCCACTTCCTCTTCCCTTTTATTATCGCAGCCGCAACAGTTATTCATCTTCTTTTTCT  
CCACGAACTGGTTCAAACAATCCTACCGGCCTGAACTCGGATTCCGACAAAGTCCC  
CTTCCACCCCTACTTTACGTACAAAGATCTCTTGCTTCGCAGTTCTTCTGACTGCAC  
TGGCCTCCCTCGCCCTATTTTCCCCAAATCTTTTAGGAGACCCGGACAATTTACCCC  
CGCAAACCCGCTTGTTACACCTCCTCACATCAAGCCAGAATGATACTTCCTCTTTGCT  
TACGCCATTCTCCGCTCCATTCCAAACAAGCTTGGGGGCGTACTTGCCCTTCTATTCT  
CGATTCTGGTTCTTATGCTCGTTCCCTTTCTCCACACATCTAAACAACGAAGCTTAAT  
GTTTCGTCCTGTAACACAATTCCTGTTCTGATCTTTAGTAGCTGACGTAATAATTCTG



ACTTGAATTGGAGGAATACCCGTAGAACACCCTTTTCGTTATCATTGGACAAGTAGCA  
TCCCTCATCTACTTCTCCCTTTTCCTGGTCCTAATCCCAACAGCAGGCTGAATGGAAA  
ACAAAGTCCTTGGATGAAAATATGATTTCAACCCTCATTACGCATATTATTAATCCA  
CTAGCCTTTATTGTACCCGTTTTGCTAGCCGTAGCATTTCCTTACCCTCCTTGAACGAA  
AAGTGCTAGGCTATATACAACTCCGAAAAGGGCCTAACATCGTAGGGCCTTACGGC  
CTTCTTCAACCCATTGCTGACGGGGTGAACTATTTATCAAGGAACCCGTTTCGCCCT  
TCAACCGCCTCGCCTGTTCTGTTCCCTAGCCCCCATACTCGCACTCACCTTGGCCC  
TGACCCTTTGAGCCCCCATGCCTTTTCCCTACCCCGTTATTGACCTTAACCTGGGTAT  
CTTATTCATCCTGGCACTGTCTAGTCTTGCAGTTTATTCCATCCTTGGGTGAGGATGA  
GCATCCAATTCAAAATATGCCCTAGTGGGTGCACTACGAGCTGTTGCCCAAACGATC  
TCTTACGAAGTGAGCCTTGGGCTCATTTTACTCAACATCATTATCTTTACAGGAGGCT  
TCACGCTTCAGACCTTTAACACAGCCCAAGAAGCCATCTGACTGGTTGTGCCTGCCT  
GACCCCTAGCTGCCATGTGATACATTTCCACCCTTGCCGAAACAAACCGTGACCCCT  
TCGACCTAACAGAGGGGGAGTCTGAACTTGTCTCAGGCTTTAACGTAGAATATGCA  
GGAGGCCCCCTTCGCTTTATTCTTTTTAGCTGAATACTCAAACATTCTCCTAATGAATG  
CTCTATCCGCAACACTATTTCTGGGCGCCTCTCACATTCCGTCTATCCCAGAATTAAC  
CAGCATTAATATTATACTAAAGCAGCTCTTCTCTCAGTTGTCTTTCTCTGGGTTCGA  
GCCTCATATCCACGGTTCCGTTACGACCAACTCATACACCTCATTTGAAAAAATTTT  
CTCCCCTAACACTAGCCCTGGTTATTTGACACTTAGCGCTCCCCATCGCATTTCGCTG  
GTCTTCCACCACAACCTGTAAATGAACCCCTACATCTTGACCACCCTTCTATTTGGTTT  
GGGCCTAGGTACAACACTCACATTTGCAAGCTCGCACTGACTTCTCGCTTGAATGGG  
CCTCGAAATTAATACACTAGCCATTATTCCACTAATGGCTCAACATCACCACCCACG  
AGCAGTAGAAGCAACTACTAAGTATTTCTAGCACAAGCCACGGCAGCCGCCACAC  
TCCTGTTTGCAAGCACAAACGCTTGACTTACCGGCCAGTGGGACATCCAACAAA  
TAACACACCCGTTACCCACAACAATAATTGTGATTGCCCTGGCACTAAAAATTGGAC  
TAGACCAATGCACTCTTGACTCCCCGAAGTTCTTCAGGGCCTAGACCTTACCACCG  
GATTAATTCTGTCCACGTGACAAAACTTGCCCCCTTTGCTCTCTTACTACAAATTCA  
AACAAACACCCACCCCGCTAATCATTATCGGTTTACTTTCTGCCCTTGTGCGGTGGGT  
GAGGTGGTCTTAACCAAACACAGCTGCGTAAAATCCTGGCCTATTCTCGATTGCAC  
ACCTTGGCTGAATAATACTGATCCTTCAATTTTACCACCTCCTGAGTCTCCTCGCACT  
CCTCACATATTTTCTATGACCTTTTACGCATTTCCTCATTTTCAAAGTCAACAAGGCCA  
CCACTGTTAATGCACTCGCAATCTCCTGAGCAAAAACCCCTGCCCTCACAGCCCTCG  
CCCCCTTGTTTTACTCTCCCTCGGTGGTCTTCCACCGCTTACCGGCTTCATACCCAA  
ATGATTTATCCTCCAAGAGCTTACCAAACAGGATCTCCACCCCTCGCCACAATCGCT  
GCATTAAGTGCCTGTTAAGCCTTTACTTCTACCTCCGCCTCTCGTATGCAATGACCC  
TGACAATGTTCCCTAATAACCTCGTTGGTGTACCCCTGACGGTTCTACTCCCCCA  
ATTCACCCTTCCCTGGCCGTCTCAACCACAGCAACTACCCTTCTTCTGCCACTTGCC  
CCTGCTGCTGTGGCACTCCTCATCACCTATGAGCCTTCTTCTAACCATCATTTCAATT  
ACCGCCCTCCTCTCAACGGTACTTGCCATTGTGTCTTTTTGACTTCCTCAAATTACAC  
CAGACCACGAGAACTGTCACCATAACGAGTGTGGCTTTGACCCCATGGGTTCGCCC  
GACTACCCTTTTCACTGCGATTTTTTCTCATTGCAATCCTCTTTCTTCTATTTCGACCTA  
GAAATTGCACTTCTCCTCCCCCTCCCATGAGGGGACCAACTAGCATCCCCTCTGCTT  
ACATTTATCTGAGCTACAGCTGTCCTCTCCCTTCTAACCCTCGGCCTCATTTACGAAT  
GAATGCAGGGAGGCCTAGAATGGGCTGAATATGCTAAAAATTCTAATCCCAACACT  
CATGCTAATTCCAACGGCCTGACTACTCAAACCTAGCTGGCTATGACCCATAACTTT  
GTTATATAGCTTTTGCATCTCCCTGGCTAGTCTTTCATGGTTAAAAAATCTTTCAGAA  
ACCGGCTGATCCTCACTCAACCTATTCATGGCCACCGACTCCCTGTCAACACCCCTC  
CTGGTTCTTACATGCTGGCTCCTCCCACTAATGATCTTAGCAAGCCAGAAGCATACA  
GCCTCAGAACCACTCGGTGCGCAACGTATATACATTACACTTCTCGCCTCCTTCAGT  
TTTTTCTAATCCTAGCATTTAGCGCCACTGAACTCGTAATGTTCTACGTAATATTTGA  
AGCTACCCTGATCCCCACACTTATTATCATTACCCGCTGAGGTAATCAAACAGAACG  
CCTAAATGCGGGAACCTATTTCTCTTCTATACACTGGCAGGCTCGCTCCCCCTTCTT

GTTGCTTTGCTCTTGCTCCAGAACACATCCGGAACCCTGTCACTATTAACCCTCCATT  
ACGGAGACCCTCTGACTATCAACCTATGCCGACAAGTTATGGTGAGCAGGCTGCCTT  
CTAGCCTTCCTAGTTAAAATACCACTTTACGGTGTTACCTATGACTCCCCAAAGCA  
CACGTCGAAGCCCCAATTGCAGGCTCAATAATCCTTGCAGCTGTTCTACTAAACTA  
GGGGGTACGGCATAATCCGCATAATAACAATGCTAGAGCCTCTAACTAAGGAACT  
AAGCTACCCCTTCATTGTCTTTGCACTTTGAGGTGTAATTATAACTGGTTCAATTTGT  
CTACGCCAAACAGACCTTAAATCTCTAATTGCTTACTCATCTGTAAGCCACATGGGC  
CTGGTAGCCGGGGGAATTCTCATTCAATCGCCCTGAGGACTTACGGGAGCACTTACA  
CTTATAATTGCCCATGGTCTGACTTCCTCAGCCCTATTCTGCCTAGCAAACACAACT  
ATGAGCGAACTCACAGCCGTACAATAGTCCTGGCACGGGGACTTCAAGTGGCACTA  
CCTCTTATAGCCACTTGATGGTTCATTTCCAGCCTGGCCAACCTGGCCTTGCCACCAC  
TACCCAACCTTATAGGAGAACTAATAATTATTACTTCTCTTTTTAACTGATCTTGATG  
AACCTTGGCATTAAACAGGGTCCGGCACTCTCATTACGGCCGGTTACAGCCTCTACAT  
ATTCCTAATAACACAACGAGGGCCCTCTCCCAACACACGTAATTGCACTTGAACCATC  
ACACACCCGAGAACATCTTCTTATTGCCTTCATCTCATCCCTCTCATTCTCCTTATGC  
TCAAGCCCGAGCTGATCTGAGGTTGGACTGCCTATGACCCCCACACACTTTGCCTTC  
TCCTCAGCCTTTTTTCTAGGTTTAAACAGGCCTGGCATTCCACCGGTTCCACCTCCTCT  
CCGCCCTATTGTGCCTTGAAGGGATAATACTATCCCTATTTGTTGCCCTCTCCTTG  
AACACTCCAACCTAGACTCAACTAACTTTTCAGCATCCCCCATGCTCCTCCTTGCAATTT  
TCAGCCTGTGAAGCAAGCGCCGGGCTCGCCCTTCTGGTCGCCACTGCCCGAACCCAC  
GGGACTGACCGACTACAAAGCCTAAATCTCCTCCAATGCTAAATGCACCCACCTCC  
CTAATGATCTCATCAAGCTTGGTTACAATCTTTGCATTACTAGCCTACCCTCTGGCCA  
CTACAATTCGTCCACACCCCGAGGGCCTCAATGAGCAACATCTCACGTCAAAACA  
GCTGTAAAAATAGCCTTCTTTATCAGCCTCTTGCCCCCTCGCTTTATTCCTTAACGAAG  
GCGCCGAAACAATCGTCACTAATTGAACCTGAATAAACACTAATACCTTCGACATCA  
ACATTAGCCTAAAATTTGACTTTTATTCGATTATTTTACACCAATTGCCCTCTACGT  
TACCTGGTCCATTCTAGAATTTGCATCATGATACATGCACGCCGATCCAAACGTGAA  
CCGCTTTTTTAAGTATCTTCTGACATTTTAAATTGCCATAATTATTCTAGTAACCGCA  
AACACATGTTCCAACCTCTTATCGGCTGAGAGGGTGTGGAATCATATCATTCTC  
CTCATCGGATGATGATACGGACGAGCCGACGCTAACACTGCAGCACTTCAGGCAGT  
TCTATATAACCGGGTCGGGGACATTGGACTTATCTTCGCTATGGCTTGAATGGCAAC  
AAACCTGAACTCCTGAGAAATACAACAAATCTTTGCAACCTCCAAGACATAGACT  
TAACTTACCCCTCCTCGGACTAATCGTTGCAGCAACTGGGAAATCAGCTCAGTTTG  
GACTCCACCCTTGCTACCCTCCGCTATGGAGGGTCTACACCGGTATCTGCCCTAC  
TTCATTCTAGCACTATAGTCGTTGCCGGCATTTCCTGCTAGTCCGAATGAGCCCACT  
TCTGGAAAATAACCCGACTGCTCTCACAACCTGTCTCTGCCTCGGGGCTCTTACGAC  
ACTATTCACTGCAACTTGTGCCCTTACGCAAAATGACATTAAAAAAATCGTTGCATT  
CTCTACATCCAGCCAACCTTGGCCTCATGATGGTAACTATCGGACTCAACCAACCCCA  
ACTAGCATTTCTGCACATCTGCACACATGCCTTCTTTAAAGCCATACTCTTTCTTTGC  
TCGGGGTCTATTATTCACAGCCTAAACGACGAACAAGACATCCGAAAAATAGGAGG  
AATACACCACCTTGCACCTTTCACATCATCTTGTCTAACAATTGGCAGCCTCGCACTT  
ACAGGGACCCCCCTTCTTGGCCGGTTTCTTTTCTAAAGACGCCATCATCGAAGCATT  
AACACATCCCACCTAAACGCCTGAGCCCTAACCTTACCCTCCTGGCCACATCTTTT  
ACAGCAATCTACAGCTTCCGAGTAATTTTCTTTGTTCCCATGGGGCACCCCCGATT  
GCCCTTCTCCCCCATTAACGAAAACAACCCAGCAGTAATTAACCCGCTCAAACGACT  
AGCATGGGGCAGTATCATTGCAGGACTACTAATTACCTCAAATATTACACCCCTAAA  
AACGCCTGTCATATCCATGCCTCCCTCCTAAAACCTAGCCGCCCTTGCAAGTACAAT  
CGTAGGCCTACTTGTAGCCATGGAACCTCGCCATGCTAACCAACAAGCAATTTAAATC  
AACCCCATCTTAACGTACACAACCTTCTCCAACATACTAGGCTTTTTCCCTGCCATTG  
TACATCGCCTAACCCCTAAATTAGGGCTCGTTCTCGGCCAAGACATCGCTAATCAAA  
TAGTGGACCAGACTTGGCTAGAAAAAGCAGGCCCAAAGCCATTGTATCCTCCAAC  
CTCCCCCTGGTCTCCTCTACAAGTAATATTCAACGAGGAATAATCAAAACATACCTA

CTCTCTTCCTTTTAACTAGCCCTTATAATCCCAACACTTATTCCCTAATGACTTTT  
GTTATGTATTTAGTTTTATTTTCTCTTGTGTTGGGGTTGGTTGCAGTTGCTTCTAACCC  
GTCCCCCTACTTTGCTGCTTTAGGATTGGTTGTGGTAGCTGGCATGGGGTGTGGTGT  
ACTAGTCGGGCATGGGGGGCCCTTTTTGTCCTTAGTTCTATTTCTAATCTACTTAGGT  
GGGATATTAGTTGTATTTGCATACTCAGCAGCGTTAGCTGCTGAGCCGTACCCGGAA  
AGCTGGGGTAGCTGGTCGGTAATAGTTTACGGTTGTCTATGTGGCGGGGGTAGTGTG  
GTTTCTGCGTTGTTCTGAGGGGGGTGATATGAATCGTCTTGGGTCTGGTAGATGAG  
TTGGCGGAGTTTTCTGTGTTTCGAGGGGACATCGGAGGGGTAGCTTTAATACTACTCT  
TCTGGGGGTGGTTATTAATTATTAGTGCCTGGGTGTTACTTCTTACGCTGTTTGTGG  
TACTTGAGTTAACCGTGGCTTGAGCCGAGGGGGCGTTGCGACAGTCT

*Pseudopleuronectes yokohamae*\_KT878309

ATGATACTAAGCTTCTTTGACCAATTTATGTCCCCCGTATTCCCTGGGCATCCCACTAA  
TTGCACTAGCAATTACACTGCCTTGAACACTTTTCCCAGCCCCCGTATCCGTTGATTA  
AACAAACCGCCTAATCTCCCTTCAAGGCTGGTTTATTAGCGGCTTTACCTCACAATC  
CTTCTTCCGCTAAACCCGGGAGGCCACAAATGAGCGCTTCTATTCGCCTCGCTAATC  
TTTTCTTTTTCTATTAACATGCTCGGACTCCTTCCGTACACATTTACACCTACCACCC  
AACTCTCACTCAACCTCGGGCTTGCAGTCCCACTCTGATTGGCAACTGTCATCATGG  
TATGCGGAACCAACCAACAATTGCTTTAGGCCACCTTCTTCCAGAAGGAACTCCTAC  
CCTCCTGATCCCAGTACTAATTATCATCGAAACAATTAGCCTATTTATTCGACCCCTT  
GCTCTTGGTGTCCGACTTACAGCAAACCTCACAGCAGGCCATCTCCTCATTAGCTC  
ATTGCAACAGCTGCCTTCGTCCTTCTCCCGCTTATACCTGTTGTTGCTATTTTAAACA  
CAACGGTTCTTTTCTCCTCACTCTTCTGGAAGTTGCCGTTGCTATAATTCAAGCCTA  
TGTCTTTGTTCTACTTCTAAGTCTTTACCTACAAGAAAACGTTTAAATGCCTCAACTAA  
ACCCCGCACCCCTGATTTGCAATTTTGGTTTTCTCTTGAATAATCCTTTTAACTGTCAT  
TCCCCCAAAGTTTTAGCTCACACTTACCCTAATGAGCCAACCTCCCAAAGCACACA  
AAAACAAAACAGAACCCTGAAACTGACCATGATACTAAGTGGCAATCACACGTTGA  
TTTTTCTCGACCAATCACAAAGACATCGGCACCCTCTATCTTGTATTTGGTGCCTGAG  
CCGGAATAGTGGGAACAGGCCTAAGTCTGCTCATTTCGAGCAGAGCTAAGCCAACCC  
GGGGCTCTCCTGGGAGACGACCAAATTTATAACGTAATCGTCACCGCACACGCCTTT  
GTAATAATCTTCTTTATAGTAATACCAATTATGATCGGAGGGTTCGGAAACTGACTT  
ATTCCATTAATAATTGGGGCCCCCGATATGGCCTTCCCTCGAATAAATAACATGAGC  
TTCTGACTTCTACCCCCATCCTTTCTCCTCCTTCTAGCCTCTTCAGGCGTTGAAGCTG  
GGGCAGGAACAGGATGAACCGTGTATCCCCCACTAGCTGGAAATCTAGCACACGCC  
GGAGCATCAGTAGACCTCACCATTTTCTCACTTCACCTTGCCGGAATTTATCAATTC  
TAGGGGCAATCAACTTTATTACTACCATCATCAACATGAAACCAACAGCAGTCACTA  
TGTACCAAATCCCACTATTTGTCTGGGCGGTACTAATCACCGCCGTTCTTCTTCTTCT  
TTCCCTACCCGTCTTGGCCGCTGGCATTACAATGCTGCTGACAGACCGCAACCTAAA  
CACAACTTCTTTGACCCTGCCGGAGGGGGTGACCCCATCCTCTACCAACACCTATT  
CTGGTTCTTTGGTCATCCAGAAGTTTACATTTTAAATTCTTCCAGGCTTCGGGATGATT  
TCTCACATTGTTGCATATTATGCAGGTAAGAAAGAACCCTTTGGTTACATAGGAATA  
GTCTGGGCTATGATGGCTATCGGACTCCTGGGCTTCATTGTATGAGCCCACCACATG  
TTTACAGTCGGAATAGATGTGGACACACGAGCCTATTTTACCTCTGCCACAATAATT  
ATTGCCATTCCAACCGGCGTAAAAGTTTTTAGCTGACTCGCAACCCTTCATGGAGGA  
AGCATTAATGAGAAACCCCACTCCTGTGGGGCCCTAGGCTTTATTTTCCTATTTACA  
GTGGGAGGTCTTACTGGTATTGTCTTAGCTAACTCGTCTCTTGACATTGTGCTTCATG  
ACACATACTATGTAGTAGCCCACTTCCACTATGTCTTATCTATGGGGGCTGTATTTGC  
AATCGTTGCCGCTTTCGTACACTGATTCCCCCTATTTACAGGCTATACTCTCCACTCC  
ACATGAACAAAAATTCACTTTGGCCTAATGTTTGTAGGGGTAAACCTCACATTCTTC  
CCCCAACATTTCTGGGTCTCGCCGGAATGCCTCGGCGATATTCAGACTACCCGGAC  
GCATACACCCTTTGAAATACTGTCTCATCGATCGGCTCACTAATGTCGCTCGTCGCT  
GTGATTTTATTTTTGTTTATTATTTGAGAAGCATTTACGGCCAAACGAGAAGTCGGG  
GCAGTAGAACTAACTTCAACTAATATTGAATGACTTTACGGCTGCCCTCCACCTTAC

CACACATTTGAGGAGCCCGCATTCGTTCAAGTTCGTATAAAATAAATGGCACATCCA  
TCACAACCTGGGATTTTCAGGACGCAGCTTCCCCCCTTATAGAAGAACTACTTCACTTC  
CATGACCACGCCTTAATAATTGTCATTCTCATCAGCACAAATGGTACTTTATATCATTG  
TGGCAATGGTCACGGCCCACTAACCGATAAGCTTGTGTTAGACTCTCAAGAAATTG  
AAGTTATCTGAACAGTTCTCCCAGCTATTATTCTTATTCTCATCGCCCTCCCGTCTCT  
CCGAATTTTATACCTAATAGACGAAATTAATGATCCTCACCTGACAATTAAAGCCTT  
AGGTCACCAATGATACTGAAGCTACGAATACACAGACTACCAAGACCTCGGTTTTG  
ACTCCTACATGGTCCCAACTCAAGACCTAACCCCCGGACAATTCCGACTACTAGAAG  
CAGACCACCGAATGGTAATTCCTGTAGAATCTCCAATTCGGGTTCTTATCTCAGCTG  
AAGATGTCTTGCATTCATGAGCAGTCCCCTCCCTGGGCGTAAAAGTAGACGCCGTAC  
CTGGACGATTAAACCAAGCAACCTTTATTGTTAGCCGACCCGGCGTATTCTATGGTC  
AATGCTCTGAAATTTGCGGGGCAAACCACAGCTTTATGCCCGTCGTTGTAGAGGCAG  
TCCCCTTGACCACTTTGAGAACTGGTCTTCGCTAATAATTGAAGACGCCTATGGCC  
CCTCAAGCACACCCATACCACATAGTCGACCCGAGCCCATGACCCCTCACGGGGGC  
TATTGCTGCCCTATTGATAACATCTGGCCTTGCTATCTGATTCCACTTTCACTCCACA  
ACCCTAATAACTATTGGAACAATCCTTCTCACTCTAACAGTCTTTCAATGATGACGA  
GACGTCGTTTCGAGAAGGGACATTTCAAGGACACCACACCCCTCCCGTTCAAAAAGG  
CCTCCGATACGGAATAATTCTATTTATTACATCAGAAGTCCTATTCTTCCTAGGCTTC  
TTCTGAGCCTTTTACCCTCAAGCCTAGCACCCACTCCCGACCTAGGGGGGCTTTTGA  
CCACCAGCAGGCATCACACCTTTAGACCCCTTCGAAGTCCCGCTTCTAAACACAGCA  
GTACTGCTTGCCCTCAGGCGTAAGTGTACATGGGCACATCACAGCATCATAGAAGGT  
AAACGAAAACAAGCTATTCAATCTCTCGCCCTAACAACTTACTCGGGGGGATACTTC  
ACCTTCCTCCAAGGCCTTGAGTACCACGAAGCCCCCTTCACCATCGCAGACGGGGTT  
TACGGTGCTACATTCTTTGTTGCCACCGGCTTCCACGGACTTCACGTCTTAATTGGGT  
CGTCTTTCCTAGCCGTTTGTCTACTACGCCAAATTCTCCACCACTTTACATCAGACCA  
CCACTTTGGGTTTGAAGCAGCCGCATGATACTGACACTTCGTAGACGTCGTCTGACT  
CTTCTCTATATCTCTATTTACTGATGAGGATCTTAATGGCCAATCTCCGTAAATCTC  
ACCCCTTCTTAAAATCGCAAACGATGCTTTAGTCGACCTCCCAGCCCCCTCGAACA  
TTTCTGTCTGATGAAACTTTGGGTCTCTTTTAGGACTCTGCCTAGTGACCCAAATCGC  
TACCGGCTTATTTTTAGCCATACACTACACATCGGATATTGCTACTGCCTTCACCTCC  
GTTGCACACATCTGCCGGGACGTCAACTACGGCTGACTTATCCGAAGCATCCATGCC  
AATGGCGCATCATTCTTTTTTATCTGTATCTACCTTCACATCGGCCGGGGTCTCTACT  
ACGGCTCCTACCTGTACAAAGAAACATGAACCATCGGAGTCGTCTGCTGCTCCTTG  
TAATGATAACCGCTTTCGTCTGGATACGTCTCCTTGAGGACAAATGTCATTTTGAG  
GTGCAACCGTCATTACCAACCTACTATCTGCAGTACCTTATGTTGGGGGTACTCTTGT  
CCAGTGAATTTGAGGTGGCTTTTCTGTAGATAATGCCACCCTCACTCGGTTCTTTGCG  
TTCCACTTCCTCTTCCCTTTTATTATCGCAGCCGCAACAGTTATTCATCTTCTTTTCT  
CCACGAACTGGTTCAAACAATCCTACCGGCCTGAACTCGGATTCCGACAAAGTCCC  
CTTCCACCCCTACTTTACGTACAAAGATCTCTTGGCTTCGCAGTTCTTCTGACTGCAC  
TGGCCTCCCTCGCCCTATTTTCCCCAAATCTTTTAGGAGACCCGGACAATTTACCCC  
CGCAAACCCGCTTGTTACACCTCCTCACATCAAGCCAGAATGATACTTCTCTTTGCT  
TACGCCATTCTCCGCTCCATTCCAAACAAGCTTGGGGGCGTACTTGCCCTTCTATTCT  
CGATTCTGGTTCTTATGCTCGTTCCCTTTCTCCACACATCTAAACAACGAAGCTTAAT  
ATTTCTGTCCTGTAACACAATTCCTGTTCTGATCTTTAGTAGCTGACGTAATAATTCTG  
ACTTGAATTGGAGGAATACCCGTAGAACACCCCTTTCGTTATCATTGGACAAGTAGCA  
TCCCTCATCTACTTCTCCCTTTTCTGGTCCTAATCCCAACAGCAGGCTGAATGGAAA  
ACAAAGTCCTTGGATGAAAATATGATTTCAACCCCTCATTACGCATATTATTAATCCA  
CTAGCCTTTATTGTACCCGTTTTGCTAGCCGTAGCATTCCCTTACCCTCCTTGAACGAA  
AAGTGCTAGGCTATATACAACCTCCGAAAAGGGCCTAACATCGTAGGGCCTTACGGC  
CTTCTTCAACCCATTGCTGACGGGGTGAAACTATTTATCAAGGAACCCGTTTCGCCCT  
TCAACCGCCTCGCCTGTTCTGTTCTCCTAGCCCCCATACTCGCACTCACCTTGGCTC  
TGACCCTTTGAGCCCCCATGCCTTTTCCCTACCCCGTTATTGACCTTAACCTGGGTAT

CTTATTCATCCTGGCACTGTCTAGTCTTGCAGTTTATTCCATCCTTGGGTCAGGATGA  
GCATCCAATTCAAAATATGCCCTAGTGGGTGCACTACGAGCTGTTGCCCAAACGATC  
TCTTACGAAGTGAGCCTTGGGCTCATTTTACTCAACATCATTATCTTTACAGGAGGCT  
TCACGCTTCAGACCTTTAACACAGCCCAAGAAGCCATCTGACTGGTTGTGCCTGCCT  
GACCCCTAGCTGCCATGTGATACATTTCCACCCTTGCCGAAACAAACCGTGCACCCT  
TCGACCTAACAGAGGGGGAGTCTGAACTTGTCTCAGGCTTTAACGTAGAATATGCA  
GGAGGCCCCCTTCGCTTTATTCTTTTTAGCTGAATACTCAAACATTCTCCTAATGAATG  
CTCTATCCGCAACACTATTTCTGGGCGCCTCTCACATTCCGTCTATCCCAGAATTAAC  
CAGCATTAATATTATACTAAAGCAGCTCTTCTCTCAGTTGTCTTTCTCTGGGTTCGA  
GCCTCATATCCACGGTTCCGTTACGACCAACTCATAACCTCATTGAAAAAATTC  
CTCCCACTAACACTAGCCCTGGTTATTTGACACTTAGCGCTCCCCATCGCATTCTGCTG  
GTCTTCCACCACAACCTGTAAATGAACCCCTACATCTTGACCACCCTTCTATTTGGTTT  
GGGCCTAGGTACAACACTCACATTTGCAAGCTCGCACTGACTTCTCGCTTGAATGGG  
CCTCGAAATTAATACACTAGCCATTATTCCACTAATGGCTCAACATCACCACCCACG  
AGCAGTAGAAGCAACTACTAAGTATTTCTAGCACAAGCCACGGCAGCCGCCACAC  
TCCTGTTTGCAAGCACAAACCAACGCTTGACTTACCGGCCAGTGGGACATCCAACAAA  
TAACACACCCCGTTACCCACAACAATAATTGTGATTGCCCTAGCACTAAAAATTGGAC  
TAGCACC AATGCACTCTTGACTCCCCGAAGTTCTTCAGGGCCTAGACCTTACCACCG  
GATTAATTCTGTCCACGTGGCAAAAACCTTGCCCCCTTTGCTCTCTTACTACAAATTCA  
AACAAACACCCCAACCCCGCTAATCATTATCGGTTTACTTTCTGCCCTTGTCGGTGGGT  
GAGGTGGTCTTAACCAAACACAGCTGCGTAAAATCCTGGCCTATTCTCGATTGCAC  
ACCTTGGCTGAATAATACTGATCCTTCAATTTTCACCACTCCTGAGTCTCCTCGCACT  
CCTCACATATTTTCTATGACCTTTTTCAGCATTCCTCATTTTCAAAGTCAACAAGGCCA  
CCACTGTTAATGCACTCGCAATCTCCTGAGCAAAAACCCCTGCCCTCACAGCCCTCG  
CCCCCTTGTTTTACTCTCCCTCGGTGGTCTTCCACCGCTTACCGGCTTCATACCCAA  
ATGATTTATCCTCCAAGAGCTTACCAAACAGGATCTCCACCCCTCGCCACAATCGCT  
GCATTA ACTGCCCTGTTAAGCCTTTACTTCTACCTCCGCCTCTCGTATGCAATGACCC  
TGACAATGTTCCCTAATAACCTCGTTGGTGTCACCCCTGACGGTTCTACTCCCCCA  
ATTCACCCTTCCCCTGGCCGTCTCAACCACAGCAACTACCCTTCTTCTGCCACTTGCC  
CCTGCTGCTGTGGCACTCCTCATCACCTATGAGCCTTCTTCTAACCATCATTTCAATT  
ACCGCCCTCCTCTCAACGGTACTTGCCATTGTGTCTTTTTGACTTCCTCAAATTACAC  
CAGACCACGAGAACTGTCACCATAACGAGTGTGGCTTTGACCCCATGGGTTCGCCC  
GACTACCCTTTTCTACTGCGATTTTTTCTCATTGCAATCCTCTTTCTTCTATTGACCTA  
GAAATTGCACTTCTCCTCCCCCTCCCATGAGGGGACCAACTAGCATCCCCCTCTGCTT  
ACATTTATCTGAGCTACAGCTGTCCTCTCCCTTCTAACCCTCGGCCTCATTTACGAAT  
GAATGCAGGGAGGCCTAGAATGGGCTGAATATGCTAAAAATTCTAATCCCAACACT  
TATGCTAATTCCAACGGCCTGACTACTCAAACCTAGCTGGCTATGACCCATAACTTT  
GTTATATAGCTTTTGTATCTCCCTGGCTAGTCTTTCATGGTTAAAAAATCTTTCAGAA  
ACCGGCTGATCCTCACTCAACCTATTCATGGCCACCGACTCCCTGTCAACACCCCTC  
CTGGTTCTTACATGCTGGCTCCTCCCACTAATGATCTTAGCAAGCCAGAAGCATACA  
GCCTCAGAACCACTCGGTTCGGCAACGTATATACATTACACTTCTCGCCTCCTTCAGT  
TTTTTCTAATCCTAGCATTTAGCGCCACTGAACTCGTAATGTTCTACGTAATATTTGA  
AGCTACCCTGATCCCCACACTTATTATCATTACCCGCTGAGGTAATCAAACAGAACG  
CCTAAATGCGGGAACCTATTTCTCTTCTATACACTGGCAGGCTCGCTCCCCCTTCTT  
GTTGCTTTGCTCTTGCTCCAGAACACATCCGGAACCCTGTCACTATTAACCCTCCATT  
ACGGAGACCCTCTGACTATCAACCTATGCCGACAAGTTATGATGAGCAGGCTGCCTT  
CTAGCCTTCTAGTTAAAATACCACTTTACGGTGTTCACCTATGACTCCCCAAAGCA  
CACGTGCAAGCCCCAATTGCAGGCTCAATAATCCTTGCAAGCTGTTCTACTTAACTA  
GGGGGTTACGGCATAATCCGCATAATAACAATGCTAGAGCCTCTAACTAAGGAACT  
AAGCTACCCTTCATTGTCTTTGCACTTTGAGGTGTAATTATAACCGGTTCAATTTGT  
CTACGCCAAACAGACCTTAAATCTCTAATTGCTTACTCATCTGTAAGCCACATGGGC  
CTGGTAGCCGGGGGAATTCTCATTCAATCGCCCTGAGGACTTACGGGAGCACTTACA

CTTATAATTGCCCATGGTCTGACTTCCTCAGCCCTATTCTGCCTAGCAAACACAAACT  
ATGAGCGAACTCACAGCCGTACAATAGTCCTGGCACGGGGACTTCAAGTGGCACTA  
CCTCTTATAGCCACCTGATGGTTCATTTCCAGCCTGGCCAACCTGGCCTTGCCACCAC  
TACCCAACCTTATAGGAGAACTAATAATTATTACTTCTCTTTTTAACTGATCTTGATG  
AACCTTGGCATTAAACAGGGTCCGGCACTCTCATTACGGCCGGTTACAGCCTCTACAT  
ATTCCTAATAACACAACGAGGGCCCTCTCCCAACACACGTAATTGCACTTGAACCATC  
ACACACCCGAGAACACCTTCTTATTGCCTTCATCTCATCCCTCTCATTCTCCTTGTGC  
TCAAGCCCGAGCTGATCTGAGGTTGGACTGCCTATGACCCCCACACACTTTGCCTTC  
TCCTCAGCCTTTTTTCTAGGTTTAAACAGGCCTGGCATTCCACCGGTTCCACCTCCTCT  
CCGCCCTATTGTGCCTTGAAGGGATAATACTATCCCTATTTGTTGCCCTCTCCTTGTG  
AACACTCCAACCTAGACTCAACTAACTTTTCAGCATCCCCCATGCTCCTCCTTGCATTT  
TCAGCCTGTGAAGCAAGCGCCGGGCTCGCCCTTCTGGTCGCCACTGCCCCGAACCCAC  
GGAAGTGAACGACTACAAAGCCTAAATCTCCTCCAATGCTAAATGCACCCACCTCC  
CTAATGATCTCATCAAGCTTGGTTACAATCTTTGCATTACTAGCCTACCCTCTGGCCA  
CTACAATTCGTCCACACCCCGAGGGCCTCAATGAGCAACATCTCACGTCAAAACA  
GCTGTAAAAATAGCCTTCTTTATCAGCCTCTTGCCCCTCGCTTTATTCTTAACGAAG  
GCGCCGAAACAATCGTCACTAATTGAACCTGAATAAACACTAATACCTTCGACATCA  
ACATTAGCCTAAAATTTGACTTTTATTCGATTATTTTTACACCAATTGCCCTCTACGT  
TACCTGGTCCATTCTAGAATTTGCATCATGATACATGCACGCCGATCCAAACGTGAA  
CCGCTTTTTTAAGTATCTTCTGACATTTTAAATTGCCATAATTATTCTAGTAACCGCA  
AACACATGTTCCAACCTTTATCGGCTGAGAGGGTGTGCGGAATCATATCATTCTC  
CTCATCGGATGATGATACGGACGAGCCGACGCTAACACTGCAGCCCTTCAGGCAGT  
TCTATATAACCGGGTCGGGGACATTGGACTTATCTTCGCTATGGCTTGAATGGCAAC  
AAACCTGAACTCCTGAGAGATACAACAAATCTTTGCAACCTCCAAAGACATAGACT  
TAACTTACCCCTCCTCGGACTAATCGTTGCAGCAACTGGGAAATCAGCTCAGTTTG  
GACTCCACCCTTGGCTACCCTCCGCTATGGAGGGTCTACACCGGTATCTGCCCTAC  
TTCATTCTAGCACTATGGTCGTTGCCGGCATTTCCTGCTAGTCCGAATGAGCCCACT  
TCTGGAAAATAACCCGACTGCTCTCACAACCTGTCTCTGCCTCGGGGCTCTTACGAC  
ACTATTCAGTCAACTTGTGCCCTTACGCAAAATGACATTAAAAAAATCGTTGCATT  
CTCTACATCCAGCCAACCTTGGCCTCATGATGGTAACTATCGGACTCAACCAACCCCA  
ACTAGCATTCTGCACATCTGCACACATGCCTTCTTTAAAGCCATACTCTTTCTTTGC  
TCGGGATCTATTATTCACAGCCTAAACGACGAACAAGACATCCGAAAAATAGGAGG  
AATACACCACCTTGCACCTTTCACATCATCTTGTCTAACAATTGGCAGCCTCGCACTT  
ACAGGGACCCCTTCTTGGCCGGTTTCTTTTCTAAAGACGCCATCATCGAAGCATTAA  
AACACATCCCACCTAAACGCCTGAGCCCTAACCCCTTACCCTCCTGGCCACATCTTTT  
ACAGCAATCTACAGCTTCCGAGTAATTTTCTTTGTTCCCATGGGCCACCCCGATTTA  
GCCCTTCTCCCCCATTAACGAAAACAACCCAGCAGTAATTAACCCGCTCAAACGACT  
AGCATGGGGCAGTATCATTGCAGGACTACTAATTACCTCAAATATTACACCCCTAAA  
AACGCCTGTCATATCCATGCCTCCCCTCCTAAACTAGCCGCCCTTGCAGTTACAAT  
CGTAGGCCTACTTGTAGCCATGGAACCTCGCCATACTAACCAACAAGCAATTTAAATC  
AACCCCATCTTAACGTACACAACCTTCTCCAACATACTAGGCTTTTTCCCTGCCATTG  
TACACCGCCTAACCCCTAAATTAGGGCTCGTTCCTCGGCCAAGACATCGCTAATCAAA  
TAGTGGACCAGACTTGGCTAGAAAAAGCAGGCCCAAAGCCATTGTATCCTCCAAC  
CTCCCCCTGGTCTCCTCTACAAGTAATATTCAACGAGGAATAATCAAAACATACCTA  
CTCTCTTCCTTTTAACTAGCCCTTATAATCCCAACACTTATTCCCTAATGACTTTT  
GTTATGTATTTAGTTTTATTTTCTTGTGTTGGGGTGGTTGCAGTTGCTTCTAACCC  
GTCCCCCTACTTTGCTGCTTTAGGATTGGTTGTGGTAGCTGGCATGGGGTGTGGTGT  
ACTAGTCGGGCATGGGGGGCCCTTTTTGTCCCTAGTTCTATTTCTAATCTACTTAGGT  
GGGATATTAGTTGTATTTGCATACTCAGCAGCGTTAGCTGCTGAGCCGTACCCGGAA  
AGCTGGGGTAGCTGGTCGGTAATAGTTTACGGTTGTCTATGTGGCGGGGGTAGTGTG  
GTTTCTGCGTTGTTCTGAGGGGGGTGATATGAATCGTCTTGGGTCCTGGTAGATGAG  
TTGGCGGAGTTTTCTGTGTTTCGAGGGGACATCGGAGGGGTAGCTTTAATACTCT

TCTGGGGGTTGGTTATTAATTATTAGTGCGTGGGTGTTACTTCTTACGCTGTTTGTGG  
TACTTGAGTTAACCGTGGCTTGAGCCGAGGGGCGTTGCGACAGTCT  
Reinhardtius\_hippoglossoides\_AM749130  
ATGATACTAAGCTTTTTTGACCAATTTATATCCCCAGTATACCTCGGTATTCCGCTAA  
TTGCACTAGCAATTACCCTCCCCTGAATTCTGTTCCCAACCCCTCAAGCCGCTGATTA  
AACAACCGTGTGCTAACACTTCAAGGATGATTTATTAGCCGCTTCACCTCACAACCT  
CTTCTTCCCCTAAACCCCGGGGGCCACAAATGAGCAGTTTTATTACCTCATTAAATGT  
TTTTCTTTTCTATTAACATACTAGGACTCCTTCCATATACCTTCACACCAACAACCCA  
ACTCTCCCTTAATATGGGCCTCGCAGTTCCCCTCTGATTAGCAACTGTCATTATGGAA  
TGCGAAATCAACCTACACATGCCCTAGGTCACCTCCTTCCAGAAGGCACCCCTACTG  
CTCTCATCCCTGTACTCATCATCATTGAAACAATTAGCCTATTTATTGACCCCTCGC  
TCTCGGTGTTGACTAACAGCGAATCTCACAGCAGGCCACCTCCTTATTCAACTCAT  
TGCAACAGCTGCCTTTGTCCTTCTTCCGCTCATACCTGTTGTTGCTATCTTAACAACG  
GTGGTCTCTTCCCTTCTTACTCTGCTAGAAGTCGCGGTGCGCCATGATCCAAGCCTATG  
TCTTTGTTCTACTCTTAAGCCTATATCTACAAGAGAACGTTTAATGCCTCAACTGAAC  
CCCGCACCCCTGATTTGCAATTTTAGTTTTCTCTTGAATAATCTTTTTAACTGTTATTCC  
CCCCAAAGTTTTAGCACATACTTACCCCAATGAACCTACCTCCCCAAAGCACACAAAA  
ACAAAACAGAACCCTGAAACTGACCATGATACTAAGTGGCAATCACACGTTGATTT  
TTCTCGACCAATCACAAAGACATCGGCACCCCTCTATCTCGTATTTGGTGCCTGAGCC  
GGTATAGTGGGAACAGGCCTAAGTCTGCTTATTCGGGCAGAACTAAGCCAACCTGG  
GGCTCTCCTTGGAGACGACCAAATTTATAACGTAATCGTCACCGCACACGCCTTTGT  
AATAATCTTTTTTATAGTAATACCCATTATGATCGGGGGTTTCGGAAACTGGCTTATT  
CCACTAATAATTGGAGCCCCAGATATGGCTTTCCCTCGAATAAATAACATGAGTTTC  
TGACTTCTTCCCCCATCCTTTCTTCTCCTCTTAGCCTCTTCAGGTGTTGAAGCTGGGG  
CAGGTACGGGGTGAACCGTTTATCCACCACTAGCTGGTAATCTGGCCCACGCCGGA  
GCATCCGTTGACCTAACAATCTTCTCACTTCACCTTGCAAGGATTTTCGTCAATTCTGG  
GGGCAATTAACCTTTATTACTACCATCATCAACATGAAACCCACAACAGTTACTATGT  
ACCAAATCCCATTATTTGTTTGAGCCGTTCTAATTACCGCCGTACTTCTTCTTCTGTC  
CCTTCCCGTCTTAGCCGCAGGGATTACAATGCTACTAACAGACCGCAACCTCAACAC  
AACCTTTTTTTGACCCCGCCGGAGGTGGTGACCCCATCCTCTATCAACACCTATTCTG  
ATTCTTTGGCCACCCAGAGGTATATATTCTCATTCTTCCAGGCTTCGGAATAATTTCC  
CACATTGTTGCATACTATGCAGGTAAAAAAGAACCTTTTGGTTACATAGGAATAGTC  
TGAGCTATAATAGCCATTGGACTCCTGGGATTCATTGTATGGGCCCATCACATGTTT  
ACAGTCGGGATAGACGTCGACACACGAGCCTACTTTACATCTGCCACAATAATCATT  
GCAATCCCGACCGGCGTAAAAGTCTTTAGCTGACTCGCAACCCTCCACGGGGGAAG  
CATCAAATGAGAAACACCACTTCTTTGGGCCCTCGGCTTTATTTTCTTCTTTACAGTA  
GGCGGTCTTACTGGCATTGTCTTGGCTAACTCCTCTCTTGACATTGTTCTGCATGACA  
CATACTATGTAGTAGCCCACTTCCACTATGTACTATCTATGGGTGCTGTATTCGCAAT  
CGTTGCCGCCTTCGTCCACTGATTCCCCTAATTACAGGTTATACCCTCCACTCCACA  
TGAACAAAAATCCACTTCGGCCTGATATTTATTGGGGTCAATCTAACGTTCTTCCCC  
CAACACTTCCCTGGGCCTAGCCGGAATGCCCCGACGATACTCAGACTACCCAGACGC  
ATATACCCTATGAAACACTGTCTCATCAATCGGATCCCTAATGTGCTCGTCGCTGT  
AATCTTATTTTTGTTTCATTATTTGAGAAGCATTTACAGCCAAACGAGAAGTTGGGGC  
AGTAGAACTTACTGCAACTAACATCGAATGACTTTACGGCTGCCCTCCACCCTACCA  
CACATTTGAAGAGCCCGCATTTCGTCCAAGTTCGAATAAACTAAATGGCACATCCCTC  
ACAACCTCGGATTTCAAGACGCAGCTTCACCCTTAATAGAAGAACTACTTCACTTCCA  
CGATCACGCCTTAATAATTGTAATTCTCATCAGCACGATAGTACTTTATATTATTGCG  
GCTATAGTTACAGCCAACTAACAGATAAACTTGTCTAGATTCTCAAGAAATTGAA  
ATTATCTGAACAGTTCTCCCAGCTGTTATTCTTATTCTCATCGCCCTACCATCTCTCC  
GAATTTTGTACTTAATAGACGAAATTAATGATCCCCACTTAACAATCAAAGCCATGG  
GCCACCAGTGGTACTGAAGCTACGAATACACAGACTATGAAGACCTCGGTTTTGACT  
CTTACATAATCCCCACACAAGACCTGACCCCTGGGCAGTTCCGACTACTTGAAGCAG

ATCACCGGATAGTAATCCCGGTAGAATCCCCTATTTCGCGTTCTAATCTCAGCTGAAG  
ATGTATTACATTCCTGAGCAGTCCCCTCCCTGGGCGTAAAAGTTGACGCCGTACCTG  
GACGATTAAATCAAGCAACCTTTATTGTTAGCCGGCCAGGCGTATTTTATGGTCAAT  
GCTCTGAAATTTGCGGAGCAAACCATAGTTTTATACCCATCGTTGTAGAAGCAGTCC  
CCCTTGAACACTTTGAAAACCTGGTCTTCACTAATAATTGAAGACGCCTATGGCCCAT  
CAAGCACACCCATACCACATAGTCGACCCCAGTCCATGACCCCTCACGGGGGCTATT  
GCTGCCCTATTGATAACATCTGGCCTTGCTATCTGATTTCACTTCCATTCCACAACCC  
TTATAACTATTGGGACAGTCCTTCTCACCTTAACAATCTTCCAATGATGACGGGACG  
TCGTACGAGAAGGCACATTTCAAGGACACCACACTCCCCCTGTTCAAATAGGCCTCC  
GATACGGAATAATCTTATTTATTACCTCAGAAGTTCTGTTCTTCTTAGGCTTCTTCTG  
AGCCTTTTACCCTCAAGCCTAGCACCTACTCCAGAAGTCTAGGAGGCTTCTGACCCCC  
AGCAGGCATTACCCCTTTAGACCCATTTGAAGTCCCGCTTCTTAACACAGCAGTCCT  
CCTTGCCCTCTGGTGTAACCTGTTACCTGAGCACATCACAGCATTATAGAGGGTAAACG  
GAAACAAACTATTCAATCTCTTGCCCTCACAATCTTACTCGGGGGTTACTTCACTTTT  
CTCCAAGGCCTTGAGTATGTCGAAGCCCCCTTCACCATTGCAGACGGAGTTTACGGT  
GCTACATTCTTTGTTGCCACCGGCTTCCACGGCCTCCACGTCTTAATCGGCACCTCAT  
TCTTAGCCGTTTGTCTGTTACGCCAAATCCTTCACCATTTTACATCAAACCACCACTT  
TGGGTTTGAAGCAGCCGCATGATACTGACACTTCGTAGACGTCGTCTGACTTTTCCT  
CTATATCTCTATTTACTGATGAGGATCTTAATGGCCAGTCTACGTAAATCCCACCCTC  
TTCTAAAAATCGCAAACGATGCTTTAGTTGACCTCCCAGCCCCCTCTAATATCTCCGT  
TTGGTGAAACTTTGGGTCTCTTCTAGGACTCTGTTTAGTAACCCAAATTGCTACCGGC  
TTGTTTCTAGCCATACACTACACATCAGATATTGCTACTGCCTTCACCTCCGTGGCTC  
ACATCTGCCGGGACGTCAACTACGGCTGACTTATCCGAAGCATTTCATGCCAACGGCG  
CATCATTCTTTTTTCATTTGCATCTACCTACACATCGGCCGAGGGCTCTACTATGGCTC  
ATACCTCTATAAAGAAACATGAACTATTGGAGTCGTCCTCCTCCTCCTCGTAATAAT  
AACGGCCTTCGTCGGATACGTCCCTCCCTTGAGGACAAATGTCCTTTTGAGGTGCAAC  
CGTTATTACCAACCTCCTATCCGCCGTCCCCTATGTTGGCGACACCCTAGTCCAATG  
GATTTGAGGTGGTTTTTCTGTAGACAATGCTACCCTTACCCGGTTCTTTGCCTTCCAC  
TTCCTTTTCCCCTTCATCATCGCCGCCGCAACAGTAATCCATCTACTATTTCTTCACG  
AAACTGGCTCAAATAATCCCACCGGCTTAAACTCAGACTCAGACAAGGTTCCCTTCC  
ACCCTTACTTCACTTACAAAGACCTCTTGGTTTTGCAGTGCTCCTCACTGCATTAGCA  
TCCCTCGCTTTGTTTTCTCCTAATCTTTTAGGAGACCCAGATAACTTTACCCCCGCAA  
ATCCACTTGTTACACCCCCACACATTAAACCAGAGTGATACTTCCTCTTTGCTTACGC  
TATTCTCCGGTCCATCCCAAACAACTTGAGAGGCGTTCTTGCCCTTTTATTTTCGATC  
TTAGTTCTCATGCTTGTCCCCTTCCTTCACACCTCTAAACAACGCAGCCTAATGTTTC  
GCCCTCTAACGCAATTTTTGTTCTGGTCTCTGGTAGCAGACGTTATAATTCTAACTTG  
AATTGGAGGAATGCCCGTAGAACACCCCTTCGTTATCATTGGACAAGTAGCATCACT  
CCTTTACTTCGCCCTCTTTCTAGTCCTAATCCCAACAGCAGGTTTACTAGAGAATAAA  
GTCCTTGGATGAAAATATGATTTCAACTCTCATTACCCATATTATTAACCCCTAACC  
TTTATTGTACCTGTACTGCTAGCCGTAGCATTCCCTCACCCCTCCTTGAACGGAAAGTCC  
TAGGCTACATACAACTCCGAAAAGGGCCTAACATCGTAGGGCCTTACGGCCTCCTTC  
AACCCATTGCTGACGGCGTAAAACCTTTTATTAAGAACCCTGTCGGCCTTCCACCG  
CATCCCCCGTTCTGTTCCCTCCTGGCCCTATACTCGCACTCACACTGGCCCTAACCCT  
TTGAGCCCCGATGCCTTTCCCGTACCCTGTTGTGGACCTTAACCTGGGTATCCTTTTT  
ATTCTAGCACTATCTAGCCTTGCAGTATACTCTATTCTTGGGTCTGGTTGAGCATCCA  
ATTCAAATAACGCTTTAGTAGGAGCACTACGAGCTGTTGCACAAACAATTTCTTACG  
AAGTTAGCCTAGGACTCATCCTCCTTAACATCATCATCTTTACCGGAGGATTTACAC  
TTCAGACCTTTAACACAGCCCAAGAGGCCATCTGACTAGTTGTACCCGCCTGACCCC  
TCGCTGCCATATGATACATCTCCACTCTTGCCGAAACAAACCGTGCACCCTTCGACC  
TAACAGAAGGGGAATCTGAACTTGTTTCAGGCTTCAACGTAGAATACGCAGGAGGA  
CCCTTCGCTTTGTTCTTTTTAGCCGAATACTCAAATATCCTCCTAATAAATACCCTGT  
CCGCAACATTATTTTTGGGCGCCTCCCACATTCCCTCTATCCCAGAATTAAGTAGCAT



TAATATTATAACTAAAGCAGCCCTTCTCTCAATTGTTTTTCTGTGAGTCCGAGCTTCG  
TACCCGCGATTCCGTTACGACCAACTTATGCACCTCATTTGAAAGAACTTTCTTCCAC  
TGACTTTAGCACTAGTTATTTGACACTTAGCGCTCCCTATTGCATTCGCTGGTCTCCC  
ACCACAACATAAATGAACCCCTACATCTTGACTACTCTTATATTTGGTTTGGGCCTA  
GGAACAACACTTACGTTTGCAAGCTCACACTGACTCCTCGCTTGAATAGGCCTCGAA  
ATTAATACACTAGCCATTATTCCGCTAATAGCCCAACATCATCACCCCCGAGCAGTC  
GAAGCTACTACTAAATACTTTCTCGCACAAGCCACAGCAGCCGCTACCCTCTTGTTT  
GCAAGTACCACCAACGCATGACTAACAGGCCAATGAGACATCCAACAAATAACACA  
CCCCCTCCCCACAACAATAATTGTTATTGCCCTAGCACTAAAAATTGGACTAGCACC  
AATACACTCTTGACTTCCAGAAGTACTTCAAGGACTAGACCTTACCACCGGACTAAT  
CCTCTCGACTTGACAAAAACTTGCACCCTTTGCCCTATTACTACAAATTCAAGCAAC  
AACCCTACGCCTCTAATCATTATTGGTTTACTATCCACCCTCGTTGGGGGATGAGGT  
GGTCTCAATCAAACCTCAATTACGTAAAGTCCTGGCCTACTCCTCGATTGCCCATCTT  
GGCTGAATAATACTAATCATTAGTTTTTACCCCTCCTCGCCCTCCTTGCCCTACTCA  
CGTATTTTCTATGACTTTTTTCAGCATTCCTAATCTTTAAAGTAAACAAGGCTACCACT  
GTCAATGCCCTCGCAATCTCATGAACAAAAACCCCTGCCCTCACAGCCCTAGCACCC  
CTAGTCTTATTGTCCCTTGGTGGCCTCCCTCCCTTACCGGCTTCATACCCAAATGAT  
TTATTCTTCAAGAGCTGACTAAGCAGGACCTCCCACCCTTGCTACCCTCGCCGCATT  
AACTGCCCTCTTAAGCCTTTACTTCTACTTGCGCCTCTCGTACGCGATAACCCTGACA  
ATGTTCCCTAACAAACCTCGTCGGCGTTACCCCTGACGGTTCTATTCTCCCCAATTTA  
CGCTTCCCCCTCGCCATGTCCACTGCAGCAACCACCCTTCTTCTCCCACTAGCCCCCTGC  
TGCTGTAGCACTACTCATAGCTTATGAGCCTTCTTCTAACCATCATTTCAATCGCCAC  
CCTCCTCTCAACAGTACTTGCCATTGTATCCTTTTGACTCCCCCAAATTACACCAGAC  
CATGAAAAGCTATCACCATACGAATGCGGCTTTGACCCGATAGGCTCTGCCCGACTA  
CCTTTTTTCGCTGCGATTTTTTCTCATCGCCATCCTCTTTCTCCTGTTGACTTAGAGAT  
TGCACTCCTCCTCCCCCTTCCCTGAGGAGACCAATTAGCATCGCCACTACTCACATTC  
ACTTGAGCTACAGCTGTCCTAGCGCTTCTAACCCTTGGCCTCATTTACGAATGAATG  
CAAGGAGGCCTAGAGTGAGCTGAATATGCTAAAAATCCTAATTCCAACACTTATGCT  
AATCCCAACAGCCTGGTTACTCAAACCCAGCTGACTCTGGCCCATAACCTTGATGTA  
TAGCTTTTGCATCTCCTTAATTAGCCTTTCATGATTGAAGAACCTCTCAGAAACCGGC  
TGATCATCACTTAACCTCTTTATAGCCACCGACTCCCTATCAACCCCCCTCCTCGTTC  
TCACATGCTGACTGCTACCACTAATGATTTTGGCAAGCCAAAAACACACAGCCTCAG  
AGCCTCTTGGTCGCCAGCGCATGTACATTACACTTCTCGCCTCCTCCAGTTCTTCCTG  
ATTCTAGCATTTAGCGCCACTGAGCTGGTAATGTTTTACGTAATATTTGAAGCCACC  
CTCATCCCCACTCTGATTATTATTACCCGCTGAGGGAACCAAACAGAACGCCTAAAT  
GCAGGGACCTACTTTCTTTTTTACACATTGGCAGGCTCACTACCTCTTCTCGTTGCTT  
TACTTCTTCTCCAGAACACATCCGGCACCCCTGTCGTTGTTAACCTACACTATAACAG  
ACCACTCACTCTCATCTTATGCAGACAAATTATGATGAGCAGGCTGTCTCTTAGCA  
TTCCTCGTTAAAATACCTCTCTATGGGGTCCACCTGTGACTCCCTAAAGCCCACGTTG  
AAGCCCCCATTGCAGGCTCAATGATCCTTGACGCGGTTCTCTTAAACTGGGAGGAT  
ATGGCATGATCCGCATAATAACAATATTAGAGCCTCTAACTAAGGAGCTAAGCTAC  
CCCTTCATTGTCTTTGCACTTTGAGGGGTAATCATAACTGGCTCAATTTGTCTACGAC  
AGACAGACCTTAAGTCCCTAATTGCCTACTCATCTGTAAGTCACATGGGCCTGGTGG  
CCGGGGGAATTCTTATTAGTCACCCTGGGGCTTAACAGGGGGCCCTTACCCTAATAA  
TTGCACACGGTCTTACCTCATCAGCCCTCTTCTGCCTAGCAAACACAAACTATGAAC  
GAACCCACAGTCGAACGATAGTACTAGCACGAGGGCTTCAAGTAGCTCTACCATTG  
ATGGCCACTTGATGATTTATTTCTAGCTTAGCCAACCTAGCCCTTCCACCACTACCTA  
ACCTCATAGGTGAACATAATAATTACTTCTCTATTCAACTGATCCTGGTGAACCTCT  
AGCATTAACCGGGGAGGCACTCTAATTACAGCTGGTTACTCCCTTTATATGTTCTT  
AATAACTCAACGGGGGCCTCTCCAGCACATATCATTGCGCTTGAGCCATCTCACAC  
CCGAGAACACCTCCTTATTGCCTTCATCTTATCCCTTGATTCTCCTCGTGCTTAAGC  
CCGAGCTGATCTGAGGTTGGACTGCCTATGACCCCCACACACTTTGCCTTCTCCTCA

GCCTTTCTTCTGGGTTTAAACAGGCCTGGCATTTCACCGGTTCCACCTCCTTTCCGCTT  
TATTATGTCTTGAAGGAATAATATTATCCCTATTTATTGCCCTCTCCCTATGGACACT  
CCAACTTGACTCAACAACTTTTCAGCATCTCCTATGCTTCTACTTGCATTTTTCAGCC  
TGCGAAGCAAGCGCCGGCCTCGCCCTGCTAGTAGCCACTGCTCGAACCCACGGAAC  
CGACCGACTACAAAGCCTAAATCTTCTCCAATGCTAAATGCACCCACCTCCCTAAT  
GATTTTCGTCAAGCCTGATCACAATCTTTGCATTGCTAGCCTATCCCCTAGTCACCACA  
ATACGACCCACGCCCCAAGAACCTCAGTGGGCTTCTACCCATGTTAAACAGCTGTA  
AAAATAGCTTTTCTTTGTTAGTCTGTTACCCCTGACCCTATTTCTTAACGAGGGTGCCG  
AGACAATCGTTACTAACTGAACCTGAATAAATACTAACTCCTTCGACATCAACATTA  
GCCTAAAATTTGACTTCTACTCAATTATTTTTACCCCATTTGCCCTCTACGTAACCTTG  
GTCCATCCTAGAATTTGCATTATGATACATGCATGCAGACCCGAACATGAACCGCTT  
CTTCAAGTATCTACTGACATTTCTGATTGCCATAATCGTTCTCGTAACCGCAAACAAT  
ATGTTTCAACTATTCATCGGTTGAGAGGGTGTGGGGATCATATCGTTCCTCCTTATCG  
GGTGGTGGTTCGGACGGGCGGATGCTAACACTGCAGCACTTCAAGCAGTACTTTAC  
AACCGGGTGGGGACATCGGTCTTATCTTCGCCATGGCTTGAATAGCAGCAAACCTG  
AACTCCTGGGAAATGCAACAAATCTTTGTAACCTCCAAAGACATAGACTTAACTTAT  
CCTCTCCTCGGGCTCATCATCGCAGCAACCGGCAAGTCGGCTCAATTTGGTCTTCAC  
CCCTGACTACCCTCCGCTATGGAGGGTCTACACCGGTCTCTGCCCTACTTCATTCTA  
GCACTATAGTCGTTGCCGGCATTTCCTGCTGGTCCGAATGAGCCCCCTCCTGGAAA  
ACAACCAAACCTGCCCTCACAACTGCCTGTGCCTCGGGGCCCTTACAACACTGTTTA  
CTGCAACCTGTGCCCTCACACAAAATGATATTAAAAAAATCGTCGCATTCTCCACAT  
CAAGCCAGCTTGGACTTATGATGGTAACCATTGGACTAAACCAACCACAACCTAGCG  
TTTCTTCACATTTGCACACACGCTTTCTTCAAGGCCATGCTATTTTTATGCTCCGGAT  
CTATTATTCATAGTCTTAATGACGAACAAGACATCCGAAAAATAGGAGGCATACAC  
CACCTTGCACCTTTTACATCCTCTTGCCTAACTATTGGCAGTCTTGCCCTTACAGGGA  
CCCCCTTCTAGCTGGCTTCTTCTCTAAAGATGCTATCATCGAAGCACTAAACACATC  
CCACCTAAACGCCTGAGCCCTAACTTTAACCCTCCTAGCCACCTCTTTCACAGCAAT  
TTACAGCTTTCGAGTAGTATTTTTTGTGCCCATGGGTCACCCCCGGTTTAATCCCTCT  
CCCCCATCAACGAAAACAACCCAGCAGTGATTAACCCACTTAAGCGATTAGCATGA  
GGAAGCATCGTTGCAGGCTTACTAATTACTTCTAACATCACACCCCTAAAAACCCCT  
GTTATATCTATAACCCCTCTCCTTAACTAGCTGCTCTTGCAGTAACAATCCTTGGCC  
TACTTGTTGCTATGGAACCTCGCCATGCTAACTAATAAGCAATATAAATCAATACCCG  
ACACAACGTACACCACTTCTCCACCTTGTTAGGCTTCTTCCCCGGAGTAATGCACCG  
CCTAGCCCCATAAATTACTCTTCTTCTTAGGCCAAAACGTTGCCAACCAAACAGTAGA  
TCAAACCTGGCTAGAAAAAATCGGCCCAAAGCCATTGAGTCCTCTAACCGACCCCT  
GATCTCTTCTACAAGTAACATTCAGCGAGGAGTAATCAAGACATATCTCCCCTTTTC  
CTCCTAACACTAGCCCTTATAATCCCCTATTTCATCGCCTAATGACTTTTGCTATATA  
TTAGTTTTATTTTCTCTCGTGTTAGGGTTAGTTGCAGTTGCTTCTAATCCATCTCCTT  
ATTTTCGCTGCTTTGGGTTTGGTTGTAGTAGCTGGGATGGGGTGTGGTATATTAGTTG  
GGCATGGGGGGCCTTTTTTGTCACTAGTTTTGTCTTAATTTACTTGGGCGGGATGCT  
AGTTGTATTTGCATACTCCGCAGCGTTAGCTGCTGAGCCGTATCCGGAGAGCTGGGG  
TAGTTGGTTCGGTAATGGTTTATGGTAGTTTACACAGGAGGGGTAATGTAGTTTCTGG  
GCTGTTCTGAGGGGGGTGATACGAGTCGTCTTGGGTCCTAGCAGATGAGTTGGCGG  
AGTTCTCCGTGTTTCGGGGGGGATATCGGAGGTGTAGCTTTAATATATTCTTCTGGGG  
GGTGGTTATTAATTATTAGCGCGTGGGTATTGCTTTTAACTTTGTTTGTGGTTCTCGA  
GTTGACCGGGGTATAAGTCGAGGGGGCGTTGCGGCAGTTT

Reinhardtius\_hippoglossoides\_AM749131

ATGATACTAAGCTTTTTTGACCAATTTATATCCCCAGTATACCTCGGTATTCCGCTAA  
TTGCACTAGCAATTACCCTCCCCTGAATTCTGTTCCCAACCCCTCAAGCCGCTGATTA  
AACAACCGTGTGCTAACACTTCAAGGATGGTTTATTAGCCGCTTCACCTCACAACCTT  
CTTCTTCCCCTAAACCCCGGGGGCCACAAATGAGCAGTTTTATTTACCTCATTAAATGT  
TTTTCTTTTCTATTAACATACTAGGACTCCTTCCATATACCTTCACACCAACAACCCA

ACTCTCCCTTAATATGGGCCTCGCAGTTCCCCTCTGATTAGCAACTGTCATTATGGAA  
TGCGAAATCAACCTACACATGCCCTAGGTCACCTCCTTCCAGAAGGCACCCCTACTG  
CTCTCATCCCTGTACTCATCATCATTGAAACAATTAGCCTATTTATTGACCCCTCGC  
TCTCGGTGTTTCGACTAACAGCGAATCTCACAGCAGGCCACCTCCTTATTCAACTCAT  
TGCAACAGCTGCCTTTGTCCTTCTTCCGCTCATACCTGTTGTTGCTATCTTAACAACG  
GTGGTCCTCTTCCTTCTTACTCTGCTAGAAGTCGCGGTGCGCCATGATCCAAGCCTATG  
TCTTTGTTCTACTCTTAAGCCTATATCTACAAGAGAACGTTTAATGCCTCAACTGAAC  
CCCGCACCCCTGATTTGCAATTTTAGTTTTCTCTTGAATAATCTTTTAACTGTTATTCC  
CCCCAAAGTTTTAGCACATACTTACCCCAATGAACCTACCTCCCCAAAGCACACAAAA  
ACAAAACAGAACCCTGAAACTGACCATGATACTAAGTGGCAATCACACGTTGATTT  
TTCTCGACCAATCACAAAGACATCGGCACCCCTCTATCTCGTATTTGGTGCCTGAGCC  
GGTATAGTGGGAACAGGCCTAAGTCTGCTTATTCGGGCAGAACTAAGCCAACCTGG  
GGCTCTCCTTGGAGACGACCAAATTTATAACGTAATCGTCACCGCACACGCCTTTGT  
AATAATCTTTTTTATAGTAATACCCATTATGATCGGGGGTTTCGGAAACTGGCTTATT  
CCACTAATAATTGGAGCCCCAGATATGGCTTTCCTCGAATAAATAACATGAGTTTC  
TGACTTCTTCCCCCATCCTTTCTTCTCCTCTTAGCCTCTTCAGGTGTTGAAGCTGGGG  
CAGGTACGGGGTGAACCGTTTATCCACCCTAGCTGGTAATCTGGCCCACGCCGGA  
GCATCCGTTGACCTAACAATCTTCTCACTTCACCTTGCAGGGATTTTCGTCAATTCTGG  
GGGCAATTAACTTTATTACTACCATCATCAACATGAAACCCACAACAGTTACTATGT  
ACCAAATCCCATTATTTGTTTGAGCCGTTCTAATTACCGCCGTACTTCTTCTTCTGTC  
CCTTCCCGTCTTAGCCGCAGGGATTACAATGCTACTAACAGACCGCAACCTCAACAC  
AACCTTTTTTGAACCCGCGCGGAGGTGGTGACCCCATCCTCTATCAACACCTATTCTG  
ATTCTTTGGCCACCCAGAGGTATATATTCTCATTCTTCCAGGCTTCGGAATAATTTCC  
CACATTGTTGCATACTATGCAGGTAAAAAAGAACCTTTTGGTTACATAGGAATAGTC  
TGAGCTATAATAGCCATTGGACTCCTGGGATTCATTGTATGGGCCCATCACATGTTT  
ACAGTCGGGATAGACGTCGACACACGAGCCTACTTTACATCTGCCACAATAATCATT  
GCAATCCCGACCGGCGTAAAAGTCTTTAGCTGACTCGCAACCCCTCCACGGGGGAAG  
CATCAAATGAGAAACGCCACTTCTTTGGGCCCTCGGCTTTATTTTCTCTTTACAGTA  
GGGGGTCTTACTGGCATTGTCTTGGCTAACTCCTCTCTTGACATTGTTCTGCATGACA  
CATACTATGTAGTAGCCCACTTCCACTATGTACTATCTATGGGTGCTGTATTCGCAAT  
CGTTGCCGCCTTCGTCCACTGATTCCCACTATTTACAGGTTATACCCTCCACTCCACA  
TGAACAAAAATCCACTTCGGCCTGATATTTATTGGGGTCAATCTAACATTCTTCCCC  
CAACACTTCCTGGGCCTAGCCGGAATGCCCCGACGATACTCAGACTACCCAGACGC  
ATATACCCTTTGAAACACTGTCTCATCAATCGGATCCCTAATGTCGCTCGTCGCTGTA  
ATCTTATTTTTGTTTATTATTTGAGAAGCATTACAGCCAAACGAGAAGTTGGGGCA  
GTAGAACTTACTGCAACTAACATCGAATGACTTTACGGCTGCCCTCCACCCTACCAC  
ACATTTGAAGAGCCCGCATTCGTCCAAGTTTGAATAAACTAAATGGCACATCCCTCA  
CAACTCGGATTTCAAGACGCAGCTTCACCCTTAATAGAAGAATACTTCACTTCCAC  
GATCACGCCTTAATAATTGTAATTCTCATCAGCACGATAGTACTTTATATTATTGCGG  
CTATAGTTACAGCCAACTAACAGATAAACTTGTTCTAGATTCTCAAGAAATTGAAA  
TTATCTGAACAGTTCTCCAGCTGTTATTCTTATTCTCATCGCCCTACCATCTCTCCG  
AATTTTGTACTTAATAGACGAAATTAATGATCCCCACTTAACAATCAAAGCCATGGG  
CCACCAGTGGTACTGAAGCTACGAATACACAGACTATGAAGACCTCGGTTTTGACTC  
TTACATAATCCCTACACAAGACCTGACCCCTGGACAGTTCCGACTACTTGAAGCAGA  
TCACCGGATAGTAATCCCGGTAGAATCTCCTATTTCGCGTTCTAATCTCAGCTGAAGA  
TGTATTACATTCTGAGCAGTCCCCTCCCTGGGCGTAAAAGTTGACGCCGTACCTGG  
ACGATTAAATCAAGCAACCTTTATTGTTAGCCGGCCAGGCGTATTTTATGGTCAATG  
CTCTGAAATTTGCGGAGCGAACCATAGTTTTATACCCATCGTTGTAGAAGCAGTCCC  
CCTTGAACACTTTGAAAACCTGGTCTTCACTAATAATTGAAGACGCCTATGGCCCATC  
AAGCACACCCATACCACATAGTCGACCCCAAGTCCATGACCCCTCACGGGGGCTATTG  
CTGCCCTATTGATAACATCTGGCCTTGCTATCTGATTTCACTTCCATTCCACAACCTT  
TATAACTATTGGGACAGTCCTTCTCACCTTAACAATCTTCCAATGATGACGGGACGT

CGTACGAGAAGGCACATTTCAAGGACACCACACTCCCCCTGTTCAAATAGGCCTCCG  
ATACGGAATAATCTTATTTATTACCTCAGAAGTTCTGTTCTTCTTAGGCTTCTTCTGA  
GCCTTTTACCCTCAAGCCTAGCACCTACTCCAGAACTAGGAGGCTTCTGACCCCCA  
GCAGGCATTACCCCTTTAGACCCATTTGAAGTCCCGCTTCTTAACACAGCAGTCCTC  
CTTGCCCTCTGGTGTAACCTGTTACCTGAGCACATCACAGCATTATAGAGGGTAAACGG  
AAACAAACTATTCAATCTCTTGCCCTCACAATCTTACTCGGGGGTTACTTCACTTTTC  
TCCAAGGCCTTGAGTATGTCGAAGCCCCCTTCACCATTGCAGACGGAGTTTACGGTG  
CTACATTCTTTGTTGCCACCGGCTTCCACGGCCTCCACGTCTTAATTGGCACCTCATT  
CTTAGCCGTTTGTCTGTTACGCCAAATCCTTCACCATTTTACATCAAACCACCACTTT  
GGGTTTGAAGCAGCCGCATGATACTGACACTTCGTAGACGTCGTCTGACTTTTCCTC  
TATATCTCTATTTACTGATGAGGATCTTAATGGCCAGTCTACGTAAATCCCACCTCT  
TCTAAAAATCGCAAACGATGCTTTAGTTGACCTCCCAGCCCCCTCTAATATCTCCGT  
TGGTGAAACTTTGGGTCTCTTCTAGGACTCTGTTTAGTAACCCAAATTGCTACCGGCT  
TGTTTCTAGCCATACACTATACATCAGATATTGCTACTGCCTTCACCTCCGTGGCTCA  
CATCTGCCGGGACGTCAACTACGGCTGACTTATCCGAAGCATTTCATGCCAACGGCGC  
ATCATTCTTTTTCATTTGCATCTACCTACACATCGGCCGAGGACTCTACTATGGCTCA  
TACCTCTATAAAGAAACATGAACTATTGGAGTCGTCTCTCTCTCTCGTAATAATA  
ACGGCCTTCGTTCGGATACGTCTCTCCCTTGAGGACAAATGTCGTTTTGAGGTGCAACC  
GTTATTACCAACCTCCTATCCGCCGTCCCCTATGTTGGCAACACCCTAGTCCAATGG  
ATTTGAGGTGGTTTTTCTGTAGACAATGCTACCCTTACCCGGTTCTTTGCCTTCCACT  
TCCTTTTCCCCTTCATCATCGCCGCCGCAACAGTAATTCATCTACTATTTCTTCACGA  
AACTGGCTCAAATAATCCCACCGGCTTAAACTCAGACTCAGACAAGGTTCCCTTCCA  
CCCTTACTTCACTTACAAAGACCTCTTGGTTTTTGCAGTGCTCCTCACTGCATTAGCAT  
CCCTCGCTTTGTTTTACCTAATCTTTTAGGAGACCCAGATAACTTTACCCCCGCAA  
TCCACTTGTTACACCCCCACACATTAAACCAGAGTGATACTTCCTCTTTGCTTACGCT  
ATTCTCCGGTCCATCCCAAACAACTTGAGGCGTTCTTGCCCTTTTATTTTCGATCT  
TAGTTCTCATGCTTGTCCTTCCCTTCACACCTCTAAACAACGCAGCCTAATGTTCCG  
CCCTCTAACGCAATTTTTGTTCTGGTCTCTGGTAGCAGACGTTATAATTCTAACTTGA  
ATTGGAGGAATGCCCGTAGAACACCCCTTCGTTATCATTGGACAAGTAGCATCACTC  
CTTTACTTCGCCCTCTTTCTGGTCCTGATCCCAACAGCAGGTTTACTAGAGAATAAA  
GTCCTTGATGAAAATATGATTCAACTCTCATTACCCATATTATTAACCCCTAACC  
TTTATTGTACCTGTATTGCTAGCCGTAGCATTCTCACCCTCCTTGAACGAAAAGTCC  
TAGGCTACATACTCCGAAAAGGGCCTAACATCGTAGGGCCTTACGGCCTCCTTC  
AACCCATTGCTGACGGCGTAAACTCTTTATTAAGAACCCGTTTCGGCCTTCCACCG  
CATCCCCCGTTCTGTTCCCTCCTGGCCCTATACTCGCACTCACACTGGCCCTGACCCT  
TTGAGCCCCGATGCCTTTCCCGTACCCTGTTGTGGACCTTAACCTGGGTATCCTTTTT  
ATTCTAGCACTATCTAGCCTTGCAGTATACTCTATTCTTGGGTCTGGTTGAGCATCCA  
ATTCAAATAACGCTTTAGTAGGAGCACTGCGGGCTGTTGCACAAACAATTTCTTACG  
AAGTTAGCCTAGGACTCATCCTCCTTAACATCATCATCTTTACCGGAGGATTTACAC  
TTCAGACCTTTAACACGGCCCAAGAGGCCATCTGACTAGTTGTACCCGCCTGACCCC  
TCGCTGCCATATGATACATCTCCACTCTTGCCGAAACAAACCGTGACCCCTTCGACC  
TAACAGAGGGGGAATCTGAACTTGTTTCAGGCTTCAACGTAGAATACGCAGGAGGG  
CCCTTCGCTTTGTTCTTTTTAGCCGAATACTCAAATATCCTCCTAATAAATACTCTGT  
CCGCAACATTATTTTTGGGCGCCTCCCACATTCCCTCTATCCCAGAATTAAGTAGCAT  
TAATATTATAACTAAAGCAGCCCTTCTCTCAATTGTTTTTCTGTGAGTCCGAGCTTCG  
TACCCGCGATTCCGTTACGACCAACTTATGCACCTCATTTGAAAGAACTTTCTTCCAC  
TGACTTTAGCACTAGTTATTTGACACTTAGCGCTCCCTATTGCATTTCGCTGGTCTCCC  
ACCACAACATAAATGAACCCCTACATCTTGACCACTCTTATATTTGGTTTGGGCCT  
AGGAACAACACTTACGTTTGCAAGCTCACACTGACTCCTCGCTTGAATAGGCCTCGA  
AATTAATACTAGCCATTATTCCACTAATAGCCCAACATCATCACCCCGAGCAGT  
CGAAGCTACTACTAAATACTTTCTCGCACAAGCCACAGCAGCCGCTACCCCTCTTGTT  
TGCAAGTACCACCAACGCATGACTAACAGGCCAATGAGACATCCAACAAATAACAC

ACCCCCTCCCCACAACAATAATTGTTATTGCCCTAGCACTAAAAATTGGACTAGCAC  
CAATACACTCTTGACTTCCAGAAGTGCTTCAAGGACTAGACCTCACCACCGGACTTA  
TCCTCTCGACTTGACAAAACTTGCACCCTTTGCCCTATTACTACAAATTCAAGCAA  
CAACCCTACGCCTCTAATCATTATTGGCTTGCTATCCACCCTCGTTGGAGGATGAGG  
TGGTCTCAATCAAACCTCAATTACGTAAAGTCCTCGCCTACTCCTCGATTGCCCATCTT  
GGCTGAATAATACTAATCATTTCAGTTTTTACCCCCTCCTCGCCCTCCTTGCCCTACTCA  
CGTATTTTCTATGACTTTTTTCAGCATTCTTAATCTTTAAAGTAAACAAGGCTACCACT  
GTCAATGCCCTCGCAATCTCATGAACAAAAACCCCTGCCCTCACAGCCCTAGCACCC  
CTAGTCTTATTGTCCCTTGGTGGCCTCCCTCCCTTACCGGCTTCATACCCAAATGAT  
TTATTCTTCAAGAACTGACTAAGCAAGACCTCCCACCCTTGCTACCCTCGCCGCATT  
AACTGCCCTCTTAAGCCTTTACTTCTACTTGCGCCTCTCGTACGCGATAACCCTGACA  
ATGTTCCCTAACAAACCTCGTCGGCGTTACCCCCTGACGGTTCTATTCTCCCCAATTTA  
CGCTTCCCCTCGCCATGTCCACTGCAGCAACCACCCTTCTTCTCCCACTAGCCCCTGC  
TGCTGTAGCACTACTCATAGCTTATGAGCCTTCTTCTAACCATCATTTCATCGCCAC  
CCTCCTCTCAACAGTACTTGCCATTGTATCCTTTTGACTCCCCAAATTACACCAGAC  
CATGAAAAGCTATCACCATACGAATGCGGCTTTGACCCGATAGGCTCTGCCCGACTA  
CCTTTTTCGCTGCGATTTTTTCTCATCGCCATCCTCTTTCTCCTGTTGACTTAGAGAT  
TGCACTCCTCCTCCCCCTTCCCTGAGGAGACCAATTAGCATCGCCACTACTCACATTC  
ACTTGAGCTACAGCTGTCCTAGCGCTTCTAACCCTTGGCCTCATTTACGAATGAATG  
CAAGGAGGCCTAGAGTGAGCTGAATATGCTAAAAATCCTAATTCCAACACTTATGCT  
AATCCCAACAGCCTGGTTACTCAAACCCAGCTGACTCTGGCCCATAACCTTGATGTA  
TAGCTTTTGCATCTCCTTAATTAGCCTTTCATGATTGAAGAACCTCTCAGAAACCGGC  
TGATCATCACTTAACCTCTTTATAGCCACCGACTCCCTATCAACCCCCCTCCTCGTTC  
TCACATGCTGGCTGCTACCACTAATGATTTTGGCAAGCCAAAAACACACAGCCTCAG  
AGCCTCTTGGTCGCCAGCGCATGTACATTACACTTCTCGCCTCCTCCAGTTCTTCCTG  
ATTCTAGCATTTAGCGCCACTGAGCTGGTAATGTTTTACGTAATATTTGAAGCCACC  
CTCATCCCCACTCTGATTATTATTACCCGCTGAGGGGAACCAAACAGAACGCCTAAAT  
GCAGGGACCTACTTTCTTTTTTACACATTGGCAGGCTCACTACCCCTTCTCGTTGCTT  
TACTTCTTCTCAGAACACATCCGGCACCTGTGCTTGCTAACCCTACACTATACAG  
ACCCACTCACTCTCATCTTATGCAGACAAATTATGATGAGCAGGCTGTCTCTTAGCA  
TTCTCGTTAAATAACCTCTCTATGGAGTCCACCTGTGACTCCCTAAAGCCCACGTTG  
AAGCCCCCATTGCAGGCTCAATGATCCTTGCAGCGGTTCTCTTAAAACTGGGAGGAT  
ATGGCATGATCCGCATAATAACAATATTAGAGCCTCTAACTAAGGAGCTAAGCTAC  
CCCTTCATTGTCTTTGCACTTTGGGGGGTAATCATAACTGGCTCAATTTGTCTACGAC  
AGACAGACCTTAAGTCCCTAATTGCCTACTCATCTGTAAGTCACATGGGCCTAGTGG  
CCGGGGGAATTCTTATTTCAGTCACCCTGGGGCTTAACAGGGGGCCCTTACCCTAATAA  
TTGCACACGGTCTTACCTCATCAGCCCTCTTCTGCCTAGCAAACACAACTATGAAC  
GAACCCACAGTCGAACGATAGTACTAGCACGAGGGCTTCAAGTAGCTCTACCATTG  
ATGGCCACTTGATGATTTATTTCTAGCTTAGCCAACCTAGCCCTTCCACCACTACCTA  
ACCTCATAGGTGAACTAATAATTACTTCTCTATTCAACTGATCCTGGTGAACCTCT  
AGCATTAACCGGGGACGCACTCTAATTACAGCTGGTTACTCCCTTTATATGTTCTT  
AATAACTCAACGGGGACCTCTCCAGCACATATCATTGCGCTTGAGCCATCTCACAC  
CCGAGAACACCTCCTTATTGCCTTCATCTTATCCCCTTGATTCTCCTCGTGCTTAAGC  
CCGAGCTGATCTGAGGTTGGACTGCCTATGACCCCCACACACTTTGCCTTCTCCTCA  
GCCTTTCTTCTGGGTTTAAACAGGCCTGGCATTTCACCGGTTCCACCTCCTTTCCGCTT  
TATTATGTCTTGAAGGAATAATACTATCCCTATTTATTGCCCTCTCCCTATGAACACT  
CCAACCTGACTCAACAACTTTTCAGCATCTCCTATGCTTCTACTTGCAATTTTCAGCC  
TGCGAAGCAAGCGCCGGCCTCGCCCTGCTAGTAGCCACTGCTCGAACCCACGGAAC  
CGACCGACTACAAAGCCTAAATCTTCTCCAATGCTAAATGCACCCACCTCCCTAAT  
GATTTTCGTCAAGCCTGATCACAATCTTTGCATTGCTAGCCTATCCCCTAGTCACCACA  
ATACGACCCACGCCCCAAGAACCTCAGTGGGCTTCTACCCATGTTAAACAGCTGTA  
AAAATAGCTTTCTTTGTTAGTCTGTTACCCCTGACCCTATTTCTTAATGAGGGTGCCG

AGACAATCGTTACTAACTGAACCTGAATAAATACTAACTCCTTCGACATCAACATTA  
GCCTAAAATTTGACTTCTACTCAATTATTTTTACCCCCATTGCCCTCTACGTAACCTG  
GTCCATCCTAGAATTTGCATTATGATACATGCATGCAGACCCAAACATAAACCGCTT  
CTTCAAGTATCTACTGACATTTCTGATTGCCATAATCGTTCTCGTAACCGCAAACAAT  
ATGTTTCAACTATTCATCGGTTGAGAGGGTGTGGGGATCATATCGTTCCTCCTTATCG  
GGTGGTGGTTCGGACGGGCGGATGCTAACACTGCAGCACTTCAAGCAGTACTTTATA  
ACCGAGTTGGGGACATCGGTCTTATCTTCGCCATGGCTTGAATAGCAGCAAACCTAA  
ACTCCTGGGAAATGCAACAAATCTTTGTAACCTCCAAAGACATAGACTTAACTTATC  
CTCTCCTCGGGCTCATCATCGCAGCAACCGGCAAGTCGGCTCAATTTGGTCTTCACC  
CCTGACTACCCTCCGCTATGGAGGGTCTACACCGGTCTCTGCCCTACTTCATTCTAG  
CACTATAGTCGTTGCCGGCATTTCCTGCTGGTCCGAATGAGCCCCCTCCTGGAAAA  
CAACCAAACCTGCCCTCACAACCTGCCTGTGCCTCGGGGCCCTTACAACACTGTTTAC  
TGCAACCTGTGCCCTCACACAAAATGATATTAATAAAAAATCGTCGCATTCTCCACATC  
AAGCCAGCTTGGACTTATGATGGTAACCATCGGACTAAACCAACCACAACCTAGCGT  
TTCTTCACATTTGCACACACGCTTTCTTCAAGGCCATACTATTTTTATGCTCCGGATC  
TATTATTCATAGTCTTAATGACGAACAAGACATCCGAAAAATAGGAGGCATACACC  
ACCTTGCGCCTTTTACATCCTCTTGCCTAACTATTGGCAGTCTTGCCCTTACAGGGGC  
CCCCTTCTTAGCTGGCTTCTTCTCTAAAGATGCTATCATCGAAGCACTAAACACATCC  
CACCTAAACGCCTGAGCCCTAACTTTAACCCCTCCTAGCCACCTCTTTCACAGCAATTT  
ACAGCTTTCGAGTAGTATTTTTGTGCCCATGGGTACCCCCGGTTTAATCCCTCTCC  
CCCATCAACGAAAATAACCCAGCAGTGATTAACCCACTTAAGCGATTAGCATGAGG  
AAGCATCGTTGCAGGCTTACTAATTACTTCTAACATTACACCCCTAAAAACCCCTGT  
TATATCTATACCCCTCTCCTTAACTAGCTGCTCTTGCAGTAACAATCCTTGGCCTA  
CTTGTTGCTATGGAACTCGCCATGCTAATAAAGCAATATAAATCAATACCCGAC  
ACAACGTACACCACTTCTCCACCTTGTTAGGCTTCTTCCCCGGAGTAATGCACCGCC  
TAGCCCTAAATTACTCTTCTTCTAGGCCAAAACGTTGCCAACCAAACAGTAGATC  
AAACCTGGCTAGAAAAAATCGGCCCCAAAGCCATTGAGTCCTCTAACCGACCCCTG  
ATCTCTTCTACAAGTAACATTCAGCGAGGAGTAATCAAGACATATCTCCCCTTTTCC  
TCCTGACACTAGCCCTTATAATCCCACTATTCATCGCCTAATGACTTTTGCTATATAT  
TTAGTTTTATTTTCTCTCGTGTTAGGGTTAGTTGCAGTTGCTTCTAATCCATCTCCTTA  
TTTCGCTGCTTTGGGTGTTGGTTGTAGTAGCTGGGATGGGGTGTGGTATATTAGTTGG  
GCATGGGGGGCCTTTTTTGTCACTAGTTTTTGTCTTAATTTACTTGGGTGGGATGCTA  
GTTGTATTTGCATACTCCGCAGCGTTAGCTGCTGAGCCGTATCCGGAGAGCTGGGGT  
AGTTGGTCGGTAATGGTTTATGGTAGTTTATACAGGAGGGGTAATGTAGTTTCTGGG  
CTGTTCTGAGGGGGGTGATACGAGTCGTCTTGGGTCCTAGCAGATGAGTTGGCGGA  
GTTCTCCGTGTTTCGGGGGGGATATCGGAGGTGTAGCCTTAATATATTCTTCTGGGGG  
GTGGTTATTAATTATTAGTGCGTGGGTATTGCTTTTAACTTTGTTTGTGGTTCTCGAG  
TTGACCGGGGTATAAGTCGAGGGGGCGTTGCGGCAGTTT

Reinhardtius\_hippoglossoides\_AM749132

ATGATACTAAGCTTTTTTGACCAATTTATATCCCCAGTATACCTCGGTATTCCGCTAA  
TTGCACTAGCAATTACCCTCCCCTGAATTCTGTTCCCAACCCCTCAAGCCGCTGATTA  
AACAACCGTGTGCTAACACTTCAAGGATGGTTTATTAGCCGCTTCACCTCACAACCTT  
CTTCTTCCCCTAAACCCCGGGGGCCACAAATGAGCAGTTTTTATTTACCTCATTAAATGT  
TTTTCTTTTCTATTAACATACTAGGACTCCTTCCATATACCTTCACACCAACAACCCA  
ACTCTCCCTTAATATGGGCCTCGCAGTTCCCCTCTGATTAGCAACTGTCATTATGGAA  
TGCGAAATCAACCTACACATGCCCTAGGTCACCTCCTTCCAGAAGGCACCCCTACTG  
CTCTCATCCCTGTACTCATCATATTGAAACAATTAGCCTATTTATTGACCCCTCGC  
TCTCGGTGTTTCGACTAACAGCGAATCTCACAGCAGGCCACCTCCTTATTCAACTCAT  
TGCAACAGCTGCCTTTGTCCTTCTTCCGCTCATACCTGTTGTTGCTATCTTAACAACG  
GTGGTCTCTTCTTCTTACTCTGCTAGAAGTCGCGGTGCCATGATCCAAGCCTATG  
TCTTTGTTCTACTCTTAAGCCTATATCTACAAGAGAACGTTTAATGCCTCAACTGAAC  
CCCGCACCCCTGATTTGCAATTTTAGTTTTCTCTTGAATAATCTTTTTAACTGTTATTC

CCCCAAAGTTTTAGCACATACTTACCCCAATGAACCTACCTCCCAAAGCACACAAAA  
ACAAAACAGAACCCTGAAACTGACCATGATACTAAGTGGCAATCACACGTTGATTT  
TTCTCGACCAATCACAAAGACATCGGCACCCTCTATCTCGTATTTGGTGCCTGAGCC  
GGTATAGTGGGAACAGGCCTAAGTCTGCTTATTCGGGCAGAACTAAGCCAACCTGG  
GGCTCTCCTTGGAGACGACCAAATTTATAACGTAATCGTCACCGCACACGCCTTTGT  
AATAATCTTTTTTATAGTAATACCCATTATGATCGGGGGTTTCGGAAACTGGCTTATT  
CCACTAATAATTGGAGCCCCAGATATGGCTTTCCCTCGAATAAATAACATGAGTTTC  
TGACTTCTTCCCCCATCCTTTCTTCTCCTCTTAGCCTCTTCAGGTGTTGAAGCTGGGG  
CAGGTACGGGGTGAACCGTTTATCCACCCTAGCTGGTAATCTGGCCCACGCCGGA  
GCATCCGTTGACCTAACAATCTTCTCACTTCACCTTGCAGGGATTTTCGTCAATTCTGG  
GGGCAATTAACCTTTATTACTACCATCATCAACATGAAACCCACAACAGTTACTATGT  
ACCAAATCCCATTATTTGTTTGAGCCGTTCTAATTACCGCCGTACTTCTTCTTCTGTC  
CCTTCCCGTCTTAGCCGCAGGGATTACAATGCTACTAACAGACCGCAACCTCAACAC  
AACCTTTTTTGACCCCGCCGGAGGTGGTGACCCCATCCTCTATCAACACCTATTCTG  
ATTCTTTGGCCACCCAGAGGTATATATTCTCATTCTTCCAGGCTTCGGAATAATTTCC  
CACATTGTTGCATACTATGCAGGTAAAAAAGAACCTTTTGGTTACATAGGAATAGTC  
TGAGCTATAATAGCCATTGGACTCCTGGGATTCATTGTATGGGCCCATCACATGTTT  
ACAGTCGGGATAGACGTCGACACACGAGCCTACTTTACATCTGCCACAATAATCATT  
GCAATCCCGACCGGCGTAAAAGTCTTTAGCTGACTCGCAACCCTCCACGGGGGAAG  
CATCAAATGAGAAACGCCACTTCTTTGGGCCCTCGGCTTTATTTTCTTCTTACAGTA  
GGGGGTCTTACTGGCATTGTCTTGGCTAACTCCTCTCTTGACATTGTTCTGCATGACA  
CATACTATGTAGTAGCCCACTTCCACTATGTACTATCTATGGGTGCTGTATTCGCAAT  
CGTTGCCGCCTTCGTCCACTGATTCCCACTATTTACAGGTTATACCCTCCACTCCACA  
TGAACAAAAATCCACTTCGGCCTGATATTTATTGGGGTCAATCTAACATTCTTCCCC  
CAACACTTCCTGGGCCTAGCCGGAATGCCCCGACGATACTCAGACTACCCAGACGC  
ATATACCCTTTGAAACACTGTCTCATCAATCGGATCCCTAATGTCGCTCGTCGCTGTA  
ATCTTATTTTTGTTTCAATTATTTGAGAAGCATTTACAGCCAAACGAGAAGTTGGGGCA  
GTAGAACTTACTGCAACTAACATCGAATGACTTTACGGCTGCCCTCCACCCTACCAC  
ACATTTGAAGAGCCCGCATTTCGTCCAAGTTTCAATAAACTAAATGGCACATCCCTCA  
CAACTCGGATTTCAAGACGCAGCTTCACCCTTAATAGAAGAACTACTTCACTTCCAC  
GATCACGCCTTAATAATTGTAATTCTCATCAGCACGATAGTACTTTATATTATTGCGG  
CTATAGTTACAGCCAACTAACAGATAAACTTGTTCTAGATTCTCAAGAAATTGAAA  
TTATCTGAACAGTTCTCCAGCTGTTATTCTTATTCTCATCGCCCTACCATCTCTCCG  
AATTTTGTACTTAATAGACGAAATTAATGATCCCCACTTAACAATCAAAGCCATGGG  
CCACCAGTGGTACTGAAGCTACGAATACACAGACTATGAAGACCTCGGTTTTGACTC  
TTACATAATCCCTACACAAGACCTGACCCCGGACAGTTCCGACTACTTGAAGCAGA  
TCACCGGATAGTAATCCCGGTAGAATCTCCTATTCGCGTTCTAATCTCAGCTGAAGA  
TGTATTACATTCTGAGCAGTCCCCCTCCCTGGGCGTAAAAGTTGACGCCGTACCTGG  
ACGATTAAATCAAGCAACCTTTATTGTTAGCCGGCCAGGCGTATTTTATGGTCAATG  
CTCTGAAATTTGCGGAGCGAACCATAGTTTTATACCCATCGTTGTAGAAGCAGTCCC  
CCTTGAACACTTTGAAAACCTGGTCTTCACTAATAATTGAAGACGCCTATGGCCCATC  
AAGCACACCCATACCACATAGTCGACCCCAAGTCCATGACCCCTCACGGGGGCTATTG  
CTGCCCTATTGATAACATCTGGCCTTGCTATCTGATTTCACTTCCATTCCACAACCT  
TATAACTATTGGGACAGTCCTTCTCACCTTAACAATCTTCCAATGATGACGGGACGT  
CGTACGAGAAGGCACATTTCAAGGACACCACACTCCCCCTGTTCAAATAGGCCTCCG  
ATACGGAATAATCTTATTTATTACCTCAGAAGTTCTGTTCTTCTTAGGCTTCTTCTGA  
GCCTTTTACCCTCAAGCCTAGCACCTACTCCAGAACTAGGAGGCTTCTGACCCCCA  
GCAGGCATTACCCCTTTAGACCCATTTGAAGTCCCGCTTCTTAACACAGCAGTCCTC  
CTTGCCCTCTGGTGTAACCTGTTACCTGAGCACATCACAGCATTATAGAGGGGTAAACGG  
AAACAAACTATTCAATCTCTTGCCCTCACAACTTACTCGGGGGTTACTTCACTTTTC  
TCCAAGGCCTTGAGTATGTGAAGCCCCCTTACCATTGCAGACGGAGTTTACGGTG  
CTACATTCTTTGTTGCCACCGGCTTCCACGGCCTCCACGTCTTAATTGGCACCTCATT

CTTAGCCGTTTGTCTGTTACGCCAAATCCTTCACCATTTTACATCAAACCACCACTTT  
GGGTTTGAAGCAGCCGCATGATACTGACACTTCGTAGACGTCGTCTGACTTTTCCTC  
TATATCTCTATTTACTGATGAGGATCTTAATGGCCAGTCTACGTAAATCCCACCTCT  
TCTAAAAATCGCAAACGATGCTTTAGTTGACCTCCCAGCCCCCTCTAATATCTCCGTT  
TGGTGAAACTTTGGGTCTCTTCTAGGACTCTGTTTAGTAACCCAAATTGCTACCGGCT  
TGTTTCTAGCCATACACTATACATCAGATATTGCTACTGCCTTCACCTCCGTGGCTCA  
CATCTGCCGGGACGTCAACTACGGCTGACTTATCCGAAGCATTATGCCAACGGCGC  
ATCATTCTTTTTTCATTTGCATCTACCTACACATCGGCCGAGGACTCTACTATGGCTCA  
TACCTCTATAAAGAAACATGAACTATTGGAGTCGTCCTCCTCCTCCTCGTAATAATA  
ACGGCCTTCGTTCGGATACGTCCTCCCTTGAGGACAAATGTCGTTTTGAGGTGCAACC  
GTTATTACCAACCTCCTATCCGCCGTCCCCTATGTTGGCAACACCCCTAGTCCAATGG  
ATTTGAGGTGGTTTTTCTGTAGACAATGCTACCCTTACCCGGTTCTTTGCCTTCCACT  
TCCTTTTCCCCTTCATCATCGCCGCCGCAACAGTAATTCATCTACTATTTCTTCACGA  
AACTGGCTCAAATAATCCCACCGGCTTAAACTCAGACTCAGACAAGGTTCCCTTCCA  
CCCTTACTTCACTTACAAAGACCTCTTGGTTTTGCAGTGCTCCTCACTGCATTAGCAT  
CCCTCGCTTTGTTTTACCTAATCTTTTAGGAGACCCAGATAACTTTACCCCCGCAAA  
TCCACTTGTTACACCCCCACACATTAAACCAGAGTGATACTTCCTCTTTGCTTACGCT  
ATTCTCCGGTCCATCCCAAACAAACTTGGAGGCGTTCTTGCCCTTTTATTTTCGATCT  
TAGTTCTCATGCTTGTCCCCTTCCTTCACACCTCTAAACAACGCAGCCTAATGTTCCG  
CCCTCTAACGCAATTTTTGTTCTGGTCTCTGGTAGCAGACGTTATAATTCTAACTTGA  
ATCGGAGGAATGCCCCGTAGAACACCCCTTCGTTATCATTGGACAAGTAGCATCACTC  
CTTTACTTCGCCCTCTTTCTAGTCCTGATCCCAACAGCAGGTTTACTAGAGAATAAA  
GTCCTTGATGAAAATATGATTTCAACTCTCATTACCCATATTATTAACCCCTAACC  
TTTATTGTACCTGTATTGCTAGCCGTAGCATTTCCTCACCTCCTTGAACGGAAAGTCC  
TAGGCTACATACAACTCCGAAAAGGGCCTAACATCGTAGGGCCTTACGGCCTCCTTC  
AACCCATTGCTGACGGCGTAAACTCTTTATTAAGAACCCGTTCCGGCCTTCCACCG  
CATCCCCCGTTCTGTTCCCTCCTGGCCCCCTATACTCGCACTCACACTGGCCCTAACCCT  
TTGAGCCCCGATGCCTTTCCCGTACCCTGTTGTGGACCTTAACCTCGGTATCCTTTTT  
ATTCTAGCACTATCTAGCCTTGCAGTATACTCTATTCTTGGGTCTGGTTGAGCATCCA  
ATTCAAATAACGCTTTAGTAGGAGCACTGCGGGCTGTTGCACAAACAATTTCTTACG  
AAGTTAGCCTAGGACTCATCCTCCTTAACATCATCATCTTTACCGGAGGATTTACAC  
TTCAGACCTTTAACACGGCCCAAGAGGCCATCTGACTAGTTGTACCCGCCTGACCCC  
TCGCTGCCATATGATACATCTCCACTCTTGCCGAAACAAACCGTGACCCCTTCGACC  
TAACAGAGGGGGAATCTGAACTTGTTTCAGGCTTCAACGTAGAAATACGCAGGAGGG  
CCCTTCGCTTTGTTCTTTTTTAGCCGAATACTCAAATATCCTCCTAATAAATACCCTGT  
CCGCAACATTATTTTTGGGCGCCTCCCACATTCCCTCTATCCCAGAATTAAGTAGCAT  
TAATATTATAACTAAAGCAGCCCTTCTCTCAATTGTTTTTCTGTGAGTCCGAGCTTCG  
TACCCGCGATTCCGTTACGACCAACTTATGCACCTCATTGAAAGAAGTTCTTCCAC  
TGACTTTAGCACTAGTTATTTGACACTTAGCGCTCCCTATTGCATTGCTGGTCTCCC  
ACCACAACATAAATGAACCCCTACATCTTGACCACTCTTATATTTGGTTTGGGCCT  
AGGAACAACACTTACGTTTGCAAGCTCACACTGACTCCTCGCTTGAATAGGCCTCGA  
AATTAATACACTAGCCATTATTCCACTAATAGCCCAACATCATCACCCCCGAGCAGT  
CGAAGCTACTACTAAATACTTTCTCGCACAAAGCCACAGCAGCCGCTACCTCTTGTT  
TGCAAGTACCACCAACGCATGACTAACAGGCCAATGAGACATCCAACAAATAACAC  
ACCCCTCCCCACAACAATAATTGTTATTGCCCTAGCACTAAAAATTGGACTAGCAC  
CAATACACTCTTGACTTCCAGAAGTGCTTCAAGGACTAGACCTCACCACCGGACTTA  
TCCTCTCGACTTGACAAAACTTGACCCCTTTGCCCTATTACTACAAATTCAAGCAA  
CAACCTACGCTCTAATCATTATTGGCTTGCTATCCACCCTCGTTGGAGGATGAGG  
TGGTCTCAATCAAACCTCAATTACGTAAAGTCCTCGCCTACTCCTCGATTGCCCATCTT  
GGCTGAATAATACTAATCATTAGTTTTTACCCCTCCTCGCCCTCCTTGCCCTACTCA  
CGTATTTTCTATGACTTTTTTACGATTCCTAATCTTTAAAGTAAACAAGGCTACCACT  
GTCAATGCCCTCGCAATCTCATGAACAAAAACCCCTGCCCTCACAGCCTTAGCACCC



CTAGTCTTATTGTCCCTTGGTGGCCTCCCTCCCCTTACCGGCTTCATACCCAAATGAT  
TTATTCTTCAAGAGCTGACTAAGCAAGACCTCCCACCCTTGCTACCCTCGCCGCATT  
AACTGCCCTCTTAAGCCTTTACTTCTACTTGC GCCTCTCGTACGCGATAACCCTGACA  
ATGTTCCCTAACAACCTCGTCGGCGTTACCCCTGACGGTTCTATTCTCCCCAATTTA  
CGCTTCCCCTCGCCATGTCCACTGCAGCAACCACCCTTCTTCTCCCACTAGCCCCTGC  
TGCTGTAGCACTACTCATAGCTTATGAGCCTTCTTCTAACCATCATTTCATCGCCAC  
CCTCCTCTCAACAGTACTTGCCATTGTATCCTTTTGACTCCCCCAAATTACACCAGAC  
CATGAAAAGCTATCACCATACGAATGCGGCTTTGACCCGATAGGCTCTGCCCGACTA  
CCTTTTTTCGCTGCGATTTTTTCTCATCGCCATCCTCTTTCTCCTGTTGACTTAGAGAT  
TGCACTCCTCCTCCCCCTTCCCTGAGGAGACCAATTAGCATCGCCACTACTCACATTC  
ACTTGAGCTACAGCTGTCCTAGCGCTTCTAACCCTTGGCCTCATTACGAATGAATG  
CAAGGAGGCCTAGAGTGAGCTGAATATGCTAAAAATCCTAATTCCAACACTTATGCT  
AATCCCAACAGCCTGGTTACTCAAACCCAGCTGACTCTGGCCCATAACTTGATGTA  
TAGCTTTTGCATCTCCTTAATTAGCCTTTCATGATTGAAGAACCTCTCAGAAACCGGC  
TGATCATCACTTAACCTCTTTATAGCCACCGACTCCCTATCAACCCCCCTCCTCGTTC  
TCACATGCTGACTGCTACCACTAATGATTTTGGCAAGCCAAAAACACACAGCCTCAG  
AGCCTCTTGGTCGCCAGCGCATGTACATTACACTTCTCGCCTCCTCCAGTTCTTCCTG  
ATTCTAGCATTTAGCGCCACTGAGCTGGTAATGTTTTACGTAATATTTGAAGCCACC  
CTCATCCCCACTCTGATTATTATTACCCGCTGAGGGAACCAAACAGAACGCCTAAAT  
GCAGGGACCTACTTTCTTTTTTACACATTGGCAGGCTCACTACCCCTTCTCGTTGCTT  
TACTTCTTCTCCAGAACACATCCGGCACCCCTGTGCTTGCTAACCCTACACTATACAG  
ACCCACTCACTCTCATCTTATGCAGACAAATTATGATGAGCAGGCTGTCTCTTAGCA  
TTCCTCGTTAAAATACCTCTCTATGGAGTCCACCTGTGACTCCCTAAAGCCCACGTTG  
AAGCCCCCATTGCAGGCTCAATGATCCTTGCAGCGGTTCTCTTAAACTGGGAGGAT  
ATGGCATGATCCGCATAATAACAATATTAGAGCCTCTAACTAAGGAGCTAAGCTAC  
CCCTTCATTGTCTTTGCACTTTGGGGGGTAATCATAACTGGCTCAATTTGTCTACGAC  
AGACAGACCTTAAGTCCCTAATTGCCTACTCATCTGTAAGTCACATGGGCCTAGTGG  
CCGGGGGAATTCTTATTCAGTCACCCTGGGGCTTAACAGGGGGCCCTTACCCTAATAA  
TTGCACACGGTCTTACCTCATCAGCCCTCTTCTGCCTAGCAAACACAACTATGAAC  
GAACCCACAGTCGAACGATAGTACTAGCACGAGGGCTTCAAGTAGCTCTACCATTG  
ATGGCCACTTGATGATTTATTTCTAGCTTAGCCAACCTAGCCCTTCCACCACTACCTA  
ACCTCATAGGTGAACTAATAATTATTACTTCTCTATTCAACTGATCCTGGTGAACCTCT  
AGCATTAACCGGGGACGGCACTCTAATTACAGCTGGTTACTCCCTTTATATGTTCTT  
AATAACTCAACGGGGACCTCTCCAGCACATATCATTGCGCTTGAGCCATCTCACAC  
CCGAGAACACCTCCTTATTGCCTTCATCTTATCCCCTTGATTCTCCTCGTGCTTAAGC  
CCGAGCTGATCTGAGGTTGGACTGCCTATGACCCCCACACACTTTGCCTTCTCCTCA  
GCCTTTCTTCTGGGTTTAAACAGGCCTGGCATTTCACCGGTTCCACCTCCTTTCCGCTT  
TATTATGTCTTGAAGGAATAATACTATCCCTATTTATTGCCCTCTCCCTATGAACACT  
CCAACCTGACTCAACAACTTTTCAGCATCTCCTATGCTTCTACTTGCATTTTCAGCC  
TGCGAAGCAAGCGCCGGCCTCGCCCTGCTAGTAGCCACTGCTCGAACCCACGGAAC  
CGACCGACTACAAAGCCTAAATCTTCTCCAATGCTAAATGCACCCACCTCCCTAAT  
GATTTTCGTCAAGCCTGATCACAATCTTTGCATTGCTAGCCTATCCCCTAGTCACCACA  
ATACGACCCACGCCCCAAGAACCTCAGTGGGCTTCTACCCATGTTAAAACAGCTGTA  
AAAATAGCTTTTCTTTGTTAGTCTGTTACCCCTGACCCTATTTCTTAATGAGGGTGCCG  
AGACAATCGTTACTAACTGAACCTGAATAAATACTAACTCCTTCGACATCAACATTA  
GCCTAAAATTTGACTTCTACTCAATTATTTTTACCCCATTTGCCCTCTACGTAACCTTG  
GTCCATCCTAGAATTTGCATTATGATACATGCATGCAGACCCAAACATAAACCGCTT  
CTTCAAGTATCTACTGACATTTCTGATTGCCATAATCGTTCTCGTAACCGCAAACAAT  
ATGTTTCAACTATTCATCGGTTGAGAGGGTGTGGGGATCATATCGTTCTCCTTATCG  
GGTGGTGGTTCGGACGGGCGGATGCTAACACTGCAGCACTTCAAGCAGTACTTTATA  
ACCGAGTTGGGGACATCGGTCTTATCTTCGCCATGGCTTGAATAGCAGCAAACCTAA  
ACTCCTGGGAAATGCAACAAATCTTTGTAACCTCCAAAGACATAGACTTAACTTATC

CTCTCCTCGGGCTCATCATCGCAGCAACCGGCAAGTCGGGCTCAATTTGGTCTTCACC  
CCTGACTACCCTCCGCTATGGAGGGTCTACACCGGTCTCTGCCCTACTTCATTCTAG  
CACTATAGTCGTTGCCGGCATTTCCTGCTGGTCCGAATGAGCCCCCTCCTGGAAAA  
CAACCAAACCTGCCCTCACAACCTGCCTGTGCCTCGGGGGCCCTTACAACACTGTTTAC  
TGCAACCTGTGCCCTCACACAAAATGATATTAATAAAAAATCGTCGCATTCTCCACATC  
AAGCCAGCTTGGAAGTTATGATGGTAACCATCGGACTAAACCAACCACAACCTAGCGT  
TTCTTCACATTTGCACACACGCTTTCTTCAAGGCCATGCTATTTTTATGCTCCGGATC  
TATTATTCATAGTCTTAATGACGAACAAGACATCCGAAAAATAGGAGGCATACACC  
ACCTTGCGCCTTTTACATCCTCTTGCCTAACTATTGGCAGTCTTGCCCTTACAGGGAC  
CCCCTTCTTAGCTGGCTTCTTCTCTAAAGATGCTATCATCGAAGCACTAAACACATCC  
CACCTAAACGCCTGAGCCCTAACTTTAACCTCCTAGCCACCTCTTTCACAGCAATTT  
ACAGCTTTCGAGTAGTATTTTTTTGTGCCCATGGGCCACCCCCGGTTTAATCCCTCTCC  
CCCATCAACGAAAAATAACCCAGCAGTGATTAACCCACTTAAGCGATTAGCATGAGG  
AAGCATCGTTGCAGGCTTACTAATTACTTCTAACATTACACCCCTAAAAACCCCTGT  
TATATCTATACCCCTCTCCTTAACTAGCTGCTCTTGCAGTAACAATCCTTGGCCTA  
CTTGTTGCTATGGAACCTCGCCATGCTAACTAATAAGCAATATAAATCAATACCCGAC  
ACAACGTACACCCTTCTCCACCTTGTTAGGCTTCTTCCCCGGAGTAATGCACCGCC  
TAGCCCTAAATTACTCTTCTTCTAGGCCAAAACGTTGCCAACCAAACAGTAGATC  
AAACCTGGCTAGAAAAAATCGGCCCAAAGCCATTGAGTCCTCTAACCGACCCCTG  
ATCTCTTCTACAAGTAACATTCAGCGAGGAGTAATCAAGACATATCTCCCCTTTTCC  
TCCTGACACTAGCCCTTATAATCCCACTATTCATCGCCTAATGACTTTTGCTATATAT  
TTAGTTTTATTTTCTCTCGTGTTAGGGTTAGTTGCAGTTGCTTCTAATCCATCTCCTTA  
TTTCGCTGCTTTGGGTTTGGTTGTAGTAGCTGGGATGGGGTGTGGTATATTAGTTGG  
GCATGGGGGGCCTTTTTTGTCACTAGTTTTTGTCTTAATTTACTTGGGTGGGATGCTA  
GTTGTATTTGCATACTCCGCAGCGTTAGCTGCTGAGCCGTATCCGGAGAGCTGGGGT  
AGTTGGTCGGTAATGGTTTATGGTAGTTTATACAGGAGGGGTAAATGTAGTTTCTGGG  
CTGTTCTGAGGGGGGTGATACGAGTCGTCTTGGGTCTTAGCAGATGAGTTGGCGGA  
GTTCTCCGTGTTTCGGGGGGGATATTGGAGGTGTAGCTTTAATATATTCTTCTGGGGG  
GTGGTTATTAATTATTAGTGCGTGGGTATTGCTTTTAACTTTGTTTGTGGTTCTCGAG  
TTGACCGGGGTATAAGTCGAGGGGGCGTTGCGGCAGTTT

Reinhardtius\_hippoglossoides\_AM749133

ATGATACTAAGCTTTTTTGACCAATTTATATCCCCAGTATACCTCGGTATTCCGCTAA  
TTGCACTAGCAATTACCCTCCCCTGAATTCTGTTCCCAACCCCTCAAGCCGCTGATTA  
AACAAACCGTGTGCTAACACTTCAAGGATGGTTTATTAGCCGCTTCACCTCACAACCTT  
CTTCTTCCCCTAAACCCCGGGGGCCACAAATGAGCAGTTTTTATTTACCTCATTAAATGT  
TTTTCTTTTCTATTAACATACTAGGACTCCTTCCATATACCTTCACACCAACAACCCA  
ACTCTCCCTTAATATGGGCCTCGCAGTTCCCCTCTGATTAGCAACTGTCATTATGGAA  
TGCGAAATCAACCTACACATGCCCTAGGTCACCTCCTTCCAGAAGGCACCCCTACTG  
CTCTCATCCCTGTACTCATCATCATTGAAACAATTAGCCTATTTATTCGACCCCTCGC  
TCTCGGTGTTCTGACTAACAGCGAATCTCACAGCAGGCCACCTCCTTATTCAACTCAT  
TGCAACAGCTGCCTTTGTCCTTCTTCCGCTCATACCTGTTGTTGCTATCTTAACAACG  
GTGGTCTCTTCTTCTTACTCTGCTAGAAGTCGCGGTGCGCCATGATCCAAGCCTATG  
TCTTTGTTCTACTCTTAAGCCTATATCTACAAGAGAACGTTTAATGCCTCAACTGAAC  
CCCGCACCCCTGATTTGCAATTTTATGTTTTCTTGAATAATCTTTTTAACTGTTATTCC  
CCCCAAAGTTTTAGCACATACTTACCCCAATGAACCTACCTCCCAAAGCACACAAAA  
ACAAAACAGAACCCCTGAACTGACCATGATACTAAGTGGCAATCACACGTTGATTT  
TTCTCGACCAATCACAAAGACATCGGCACCCCTCTATCTCGTATTTGGTGCCTGAGCC  
GGTATAGTGGGAACAGGCCTAAGTCTGCTTATTCGGGCAGAACTAAGCCAACCTGG  
GGCTCTCCTTGGAGACGACCAAATTTATAACGTAATCGTCACCGCACACGCCTTTGT  
AATAATCTTTTTTATAGTAATACCCATTATGATCGGGGGTTTCGGAACTGGCTTATT  
CCACTAATAATTGGAGCCCCAGATATGGCTTTCCCTCGAATAAATAACATGAGTTTC  
TGACTTCTTCCCCCATCCTTTCTTCTCCTCTTAGCCTCTTCAGGTGTTGAAGCTGGGG

CAGGTACGGGGTGAACCGTTTATCCACCACTAGCTGGTAATCTGGCCCACGCCGGA  
GCATCCGTTGACCTAACAATCTTCTCACTTCACCTTGCAGGGATTTTCGTCAATTCTGG  
GGGCAATTAACCTTTATTACTACCATCATCAACATGAAACCCACAACAGTTACTATGT  
ACCAAATCCCATTATTTGTTTGAGCCGTTCTAATTACCGCCGTACTTCTTCTTCTGTC  
CCTTCCCGTCTTAGCCGCAGGGATTACAATGCTACTAACAGACCGCAACCTCAACAC  
AACCTTTTTTTGACCCCGCCGGAGGTGGTGACCCCATCCTCTATCAACACCTATTCTG  
ATTCTTTGGCCACCCAGAGGTATATATTCTCATTCTTCCAGGCTTCGGAATAATTTCC  
CACATTGTTGCATACTATGCAGGTAAAAAAGAACCTTTTGGTTACATAGGAATAGTC  
TGAGCTATAATAGCCATTGGACTCCTGGGATTCAATTGTATGGGCCCATCACATGTTT  
ACAGTCGGGATAGACGTCGACACACGAGCCTACTTTACATCTGCCACAATAATCATT  
GCAATCCCGACCGGCGTAAAAGTCTTTAGCTGACTCGCAACCCTCCACGGGGGAAG  
CATCAAATGAGAAACGCCACTTCTTTGGGCCCTCGGCTTTATTTTCCTCTTTACAGTA  
GGGGGTCTTACTGGCATTGTCTTGGCTAACTCCTCTCTTGACATTGTTCTGCATGACA  
CATACTATGTAGTAGCCCACTTCCACTATGTACTATCTATGGGTGCTGTATTCGCAAT  
CGTTGCCGCCTTCGTCCACTGATTCCCACTATTTACAGGTTATACCCTCCACTCCACA  
TGAACAAAAATCCACTTCGGCCTGATATTTATTGGGGTCAATCTAACATTCTTCCCC  
CAACACTTCCTGGGCCTAGCCGGAATGCCCCGACGATACTCAGACTACCCAGACGC  
ATATACCCTTTGAAACACTGTCTCATCAATCGGATCCCTAATGTCGCTCGTCGCTGTA  
ATCTTATTTTTGTTCATTATTTGAGAAGCATTTACAGCCAAACGAGAAGTTGGGGCA  
GTAGAACTTACTGCAACTAACATCGAATGACTTTACGGCTGCCCTCCACCCTACCAC  
ACATTTGAAGAGCCCGCATTTCGTCCAAGTTCGAATAAACTAAATGGCACATCCCTCA  
CAACTCGGATTTCAAGACGCAGCTTCACCCTTAATAGAAGAATACTTCACTTCCAC  
GATCACGCCTTAATAATTGTAATTCTCATCAGCACGATAGTACTTTATATTATTGCGG  
CTATAGTTACAGCCAACTAACAGATAAACTTGTTCTAGATTCTCAAGAAATTGAAA  
TTATCTGAACAGTTCTCCCAGCTGTTATTCTTATTCTCATCGCCCTACCATCTCTCCG  
AATTTTGTACTTAATAGACGAAATTAATGATCCCCACTTAACAATCAAAGCCATGGG  
CCACCAGTGGTACTGAAGCTACGAATACACAGACTATGAAGACCTCGGTTTTGACTC  
TTACATAATCCCTACACAAGACCTGACCCCTGGACAGTTCGACTACTTGAAGCAGA  
TCACCGGATAGTAATCCCGGTAGAATCTCCTATTTCGCGTTCTAATCTCAGCTGAAGA  
TGTATTACATTCTGAGCAGTCCCCTCCCTGGGCGTAAAAGTTGACGCCGTACCTGG  
ACGATTAAATCAAGCAACCTTTATTGTTAGCCGGCCAGGCGTATTTTATGGTCAATG  
CTCTGAAATTTGCGGAGCGAACCATAGTTTTATACCCATCGTTGTAGAAGCAGTCCC  
CCTTGAACTTTGAAAATGGTCTTCACTAATAATTGAAGACGCCTATGGCCCATC  
AAGCACACCCATACCACATAGTCGACCCCAAGTCCATGACCCCTCACGGGGGCTATTG  
CTGCCCTATTGATAACATCTGGCCTTGCTATCTGATTTCACTTCCATTCCACAACCCT  
TATACTATTGGGACAGTCCTTCTCACCTTAACAATCTTCCAATGATGACGGGACGT  
CGTACGAGAAGGCACATTTCAAGGACACCACACTCCCCCTGTTCAAATAGGCCTCCG  
ATACGAATAATCTTATTTATTACCTCAGAAGTTCTGTTCTTCTTAGGCTTCTTCTGA  
GCCTTTTACCACTCAAGCCTAGCACCTACTCCAGAACTAGGAGGCTTCTGACCCCCA  
GCAGGCATTACCCCTTTAGACCCATTTGAAGTCCCGCTTCTTAACACAGCAGTCCTC  
CTTGCCTCTGGTGTAACCTGTTACCTGAGCACATCACAGCATTATAGAGGGTAAACGG  
AAACAACTATTCAATCTCTTGCCCTCACAACTTACTCGGGGGTACTTCACTTTTC  
TCCAAGGCCTTGAGTATGTGGAAGCCCCCTTACCATTGCAGACGGAGTTTACGGTG  
CTACATTCTTTGTTGCCACCGGCTTCCACGGCCTCCACGTCTTAATTGGCACCTCATT  
CTTAGCCGTTTGTCTGTTACGCCAAATCCTTACCATTTTTACATCAAACCACCACTTT  
GGGTTTGAAGCAGCCGCATGATACTGACACTTCGTAGACGTCGTCTGACTTTTCCTC  
TATATCTCTATTTACTGATGAGGATCTTAATGGCCAGTCTACGTAAATCCCACCCTCT  
TCTAAAAATCGCAAACGATGCTTTAGTTGACCTCCAGCCCCCTCTAATATCTCCGTT  
TGGTGAACTTTGGGTCTCTTCTAGGACTCTGTTTAGTAACCCAAATTGCTACCGGCT  
TGTTTCTAGCCATACACTATACATCAGATATTGCTACTGCCTTCACCTCCGTGGCTCA  
CATCTGCCGGGACGTCAACTACGGCTGACTTATCCGAAGCATTTCATGCCAACGGCGC  
ATCATTCTTTTTTCATTTGCATCTACCTACACATCGGCCGAGGACTCTACTATGGCTCA

TACCTCTATAAAGAAACATGAACTATTGGAGTCGTCCTCCTCCTCCTCGTAATAATA  
ACGGCCTTCGTCGGATACGTCCTCCCTTGAGGACAAATGTCGTTTTGAGGTGCAACC  
GTTATTACCAACCTCCTATCCGCCGTCCCCTATGTTGGCAACACCCTAGTCCAATGG  
ATTTGAGGTGGTTTTTCTGTAGACAATGCTACCCTTACCCGGTTCTTTGCCCTTCCACT  
TCCTTTTCCCCTTCATCATCGCCGCCGCAACAGTAATTCATCTACTATTTCTTCACGA  
AACTGGCTCAAATAATCCCACCGGCTTAAACTCAGACTCAGACAAGGTTCCCTTCCA  
CCCTTACTTCACTTACAAAGACCTCTTGGTTTTGTCAGTGCTCCTCACTGCATTAGCAT  
CCCTCGCTTTGTTTTACCTAATCTTTTAGGAGACCCAGATAACTTTACCCCCGCAAA  
TCCACTTGTTACACCCCCACACATTAAACCAGAGTGATACTTCCTCTTTGCTTACGCT  
ATTCTCCGGTCCATCCCAAACAACTTGGAGGCGTTCTTGCCCTTTTATTTTCGATCT  
TAGTTCTCATGCTTGTCCTTCCCTTCACACCTCTAAACAACGCAGCCTAATGTTCCG  
CCCTCTAACGCAATTTTTGTTCTGGTCTCTGGTAGCAGACGTTATAATTCTAACTTGA  
ATTGGAGGAATGCCCCGTAGAACACCCCTTCGTTATCATTGGACAAGTAGCATCACTC  
CTTACTTCGCCCTCTTTCTGGTCCTGATCCCAACAGCAGGTTTACTAGAGAATAAA  
GTCCTTGATGAAAATATGATTTCAACTCTCATTACCCATATTATTAACCCCTAACC  
TTTATTGTACCTGTATTGCTAGCCGTAGCATTCTCACCCTCCTTGAACGAAAAGTCC  
TAGGCTACATACTCCGAAAAGGGCCTAACATCGTAGGGCCTTACGGCCTCCTTC  
AACCCATTGCTGACGGCGTAAACTCTTTATTAAGAACCCGTTTCGGCCTTCCACCG  
CATCCCCCGTTCTGTTCCCTCCTGGCCCTATACTCGCACTCACACTGGCCCTGACCCT  
TTGAGCCCCCATGCCTTTCCCGTACCCTGTTGTGGACCTTAACCTGGGTATCCTTTTT  
ATTCTAGCACTATCTAGCCTTGTCAGTATACTCTATTCTTGGGTCTGGTTGAGCATCCA  
ATTCAAATAACGCTTTAGTAGGAGCACTGCGGGCTGTTGCACAAACAATTTCTTACG  
AAGTTAGCCTAGGACTCATCCTCCTTAACATCATCATCTTTACCGGAGGATTTACAC  
TTCAGACCTTTAACACGGCCCAAGAGGCCATCTGACTAGTTGTACCCGCCTGACCCC  
TCGCTGCCATATGATACATCTCCACTCTTGCCGAAACAACCGTGCACCCTTCGACC  
TAACAGAGGGGGAATCTGAACTTGTTTCAGGCTTCAACGTAGAATACGCAGGAGGG  
CCCTTCGCTTTGTTCTTTTAGCCGAATACTCAAATATCCTCCTAATAAATACTCTGT  
CCGCAACATTATTTTTGGGCGCCTCCCACATTCCCTCTATCCCAGAATTAAGTAGCAT  
TAATATTATACTAAAGCAGCCCTTCTCTCAATTGTTTTTCTGTGAGTCCGAGCTTCG  
TACCCGCGATTCCGTTACGACCAACTTATGCACCTCATTTGAAAGAAGTTTCTTCCAC  
TGACTTTAGCACTAGTTATTTGACACTTAGCGCTCCCTATTGCATTCGCTGGTCTCCC  
ACCACAACATAAATGAACCCCTACATCTTGACCACTCTTATATTTGGTTTGGGCCT  
AGGAACAACACTTACGTTTGCAAGCTCACACTGACTCCTCGCTTGAATAGGCCTCGA  
AATTAATACACTAGCCATTATTCCACTAATAGCCCAACATCATCACCCCGAGCAGT  
CGAAGCTACTACTAAATACTTTCTCGCACAAGCCACAGCAGCCGCTACCCTCTTGTT  
TGCAAGTACCACCAACGCATGACTAACAGGCCAATGAGACATCCAACAAATAACAC  
ACCCCTCCCCACAACAATAATTGTTATTGCCCTAGCACTAAAAATTGGACTAGCAC  
CAATACACTCTTGACTTCCAGAAGTGCTTCAAGGACTAGACCTCACCACCGGACTTA  
TCCTCTCGACTTGACAAAACTTGACCCCTTTGCCCTATTACTACAAATTCAAGCAA  
CAACCCTACGCCTCTAATCATTATTGGCTTGCTATCCACCCTCGTTGGAGGATGAGG  
TGGTCTCAATCAAACCTCAATTACGTAAAGTCCTCGCCTACTCCTCGATTGCCCATCTT  
GGCTGAATAATACTAATCATTAGTTTTACCCCTCCTCGCCCTCCTTGCCCTACTCA  
CGTATTTTCTATGACTTTTTTCAGCATTCCTAATCTTTAAAGTAAACAAGGCTACCACT  
GTCAATGCCCTCGCAATCTCATGAACAAAAACCCCTGCCCTCACAGCCCTAGCACCC  
CTAGTCTTATTGTCCCTTGGTGGCCTCCCTCCCCTTACCGGCTTCATACCCAAATGAT  
TTATTCTTCAAGAACTGACTAAGCAAGACCTCCCACCCTTGCTACCCTCGCCGCATT  
AACTGCCCTCTTAAGCCTTTACTTCTACTTGCGCCTCTCGTACGCGATAACCCTGACA  
ATGTTCCCTAACAAACCTCGTCGGCGTTACCCCTGACGGTTCTATTCTCCCCAATTTA  
CGCTTCCCCTCGCCATGTCCACTGCAGCAACCACCCTTCTTCTCCCACTAGCCCCTGC  
TGCTGTAGCACTACTCATAGCTTATGAGCCTTCTTCTAACCATCATTTCAATCGCCAC  
CCTCCTCTCAACAGTACTTGCCATTGTATCCTTTTGACTCCCCCAAATTACACCAGAC  
CATGAAAAGCTATCACCATACGAATGCGGGCTTTGACCCGATAGGCTCTGCCCGACTA

CCTTTTTTCGCTGCGATTTTTTCTCATCGCCATCCTCTTTCTCCTGTTCGACTTAGAGAT  
TGCACTCCTCCTCCCCCTTCCCTGAGGAGACCAATTAGCATCGCCACTACTCACATTC  
ACTTGAGCTACAGCTGTCCTAGCGCTTCTAACCCTTGGCCTCATTACGAATGAATG  
CAAGGAGGCCTAGAGTGAGCTGAATATGCTAAAAATCCTAATTCCAACACTTATGCT  
AATCCCATCAGCCTGGTACTCAAACCCAGCTGACTCTGGCCCATAACCTTGATGTA  
TAGCTTTTGCATCTCCTTAATTAGCCTTTCATGATTGAAGAACCTCTCAGAAACCGGC  
TGATCATCACTTAACCTCTTTATAGCCACCGACTCCCTATCAACCCCCCTCCTCGTTC  
TCACATGCTGGCTGCTACCACTAATGATTTTGGCAAGCCAAAAACACACAGCCTCAG  
AGCCTCTTGGTCGCCAGCGCATGTACATTACACTTCTCGCCTCCTCCAGTTCTTCCTG  
ATTCTAGCATTTAGCGCCACTGAGCTGGTAATGTTTTACGTAATATTTGAAGCCACC  
CTCATCCCCACTCTGATTATTATTACCCGCTGAGGGAACCAAACAGAACGCCTAAAT  
GCAGGGACCTACTTTCTTTTTTACACATTGGCAGGCTCACTACCCCTTCTCGTTGCTT  
TACTTCTTCTCCAGAACACATCCGGCACCCCTGTCGTTGCTAACCCTACACTATACAG  
ACCCACTCACTCTCATCTTATGCAGACAAATTATGATGAGCAGGCTGTCTCTTAGCA  
TTCCTCGTTAAAATACCTCTCTATGGAGTCCACCTGTGACTCCCTAAAGCCCACGTTG  
AAGCCCCCATTGCAGGCTCAATGATCCTTGCAGCGGTTCTCTTAAAACTGGGAGGGT  
ATGGCATGATCCGCATAATAACAATATTAGAGCCTCTAACTAAGGAGCTAAGCTAC  
CCCTTCATTGTCTTTGCACTTTGGGGGGTAATCATAACTGGCTCAATTTGTCTACGAC  
AGACAGACCTTAAGTCCCTAATTGCCTACTCATCTGTAAGTCACATGGGCCTAGTGG  
CCGGGGGAATTCTTATTCAGTTACCCTGGGGCTTAACAGGGGGCCCTTACCCTAATAA  
TTGCACACGGTCTTACCTCATCAGCCCTCTTCTGCCTAGCAAACACAACTATGAAC  
GAACCCACAGTCGAACGATAGTACTAGCACGAGGGCTTCAAGTAGCTCTACCATTG  
ATGGCCACTTGATGATTTATTTCTAGCTTAGCCAACCTAGCCCTTCCACCACTACCTA  
ACCTCATAGGTGAACATAATAATTACTTCTCTATTCAACTGATCCTGGTGAACCTCT  
AGCATTAAACCGGGGCAGGCACTCTAATTACAGCTGGTACTCCCTTTATATGTTCTT  
AATAACTCAACGGGGACCTCTCCAGCACATATCATTGCGCTTGAGCCATCTCACAC  
CCGAGAACACCTCCTTATTGCCTTCATCTTATCCCTTGATTCTCCTCGTGCTTAAGC  
CCGAGCTGATCTGAGGTTGGACTGCCTATGACCCCCACACACTTTGCCTTCTCCTCA  
GCCTTTCTTCTGGGTTTAACAGGCCTGGCATTTCACCGGTTCCACCTCCTTTCGCTT  
TATTATGTCTTGAAGGAATAATACTATCCCTATTTATTGCCCTCTCCCTATGAACACT  
CCAACTTGACTCAACAACTTTTCAGCATCTCCTATGCTTCTACTTGCATTTTCAGCC  
TGCGAAGCAAGCGCCGGCCTCGCCCTGCTAGTAGCCACTGCTCGAACCCACGGAAC  
CGACCGACTACAAAGCCTAAATCTTCTCCAATGCTAAATGCACCCACCTCCCTAAT  
GATTTTCGTCAAGCCTGATCACAATCTTTGCATTGCTAGCCTATCCCTAGTCACCACA  
ATACGACCCACGCCCCAAGAACCTCAGTGGGCTTCTACCCATGTTAAAACAGCTGTA  
AAAATAGCTTTCTTTGTTAGTCTGTTACCCCTGACCCTATTTCTTAATGAGGGTGCCG  
AGACAATCGTTACTAACTGAACCTGAATAAATACTAACTCCTTCGACATCAACATTA  
GCCTAAAATTTGACTTCTACTCAATTATTTTTACCCCCATTGCCCTCTACGTAACCTG  
GTCCATCCTAGAATTTGCATTATGATACATGCATGCAGACCCAAACATAAACCCTT  
CTTCAAGTATCTACTGACATTTCTGATTGCCATAATCGTTCTCGTAACCGCAAACAAT  
ATGTTTCAACTATTCATCGGTTGAGAGGGTGTGGGGATCATATCGTTCCTCCTTATCG  
GGTGGTGGTTCGGACGGGGCGGATGCTAACACTGCAGCACTTCAAGCAGTACTTTATA  
ACCGAGTTGGGGACATCGGTCTTATCTTCGCCATGGCTTGAATAGCAGCAAACCTAA  
ACTCCTGGGAAATGCAACAAATCTTTGTAACCTCCAAAGACATAGACTTAACTTATC  
CTCTCCTCGGGCTCATCATCGCAGCAACCGGCAAGTCGGCTCAATTTGGTCTTCACC  
CCTGACTACCCTCCGCTATGGAGGGTCTACACCGGTCTCTGCCCTACTTCATTCTAG  
CACTATAGTCGTTGCCGGCATTTCCTGCTGGTCCGAATGAGCCCCCTCCTGGAAAA  
CAACCAAACCTGCCCTCACAACCTGCCTGTGCCTCGGGGGCCCTTACAACACTGTTTAC  
TGCAACCTGTGCCCTCACACAAAATGATATTAAAAAAATCGTCGCATTCTCCACATC  
AAGCCAGCTTGGACTTATGATGGTAACCATCGGACTAAACCAACCACAACACTAGCGT  
TTCTTCACATTTGCACACACGCTTTCTTCAAGGCCATGCTATTTTTATGCTCCGGATC  
TATTATTCATAGTCTTAATGACGAACAAGACATCCGAAAAATAGGAGGCATACACC

ACCTTGCGCCTTTTACATCCTCTTGCCTAACTATTGGCAGTCTTGCCCTTACAGGGAC  
CCCCTTCTTAGCTGGCTTCTTCTCTAAAGATGCCATCATCGAAGCACTAAACACATC  
CCACCTAAACGCCTGAGCCCTAACTTTAACCCTCCTAGCCACCTCTTTCACAGCAAT  
TTACAGCTTTCGAGTAGTATTTTTTTGTGCCCATGGGTCACCCCCGGTTTAATCCCTCT  
CCCCCATCAACGAAAATAAACCAGCAGTGATTAACCCACTTAAGCGATTAGCATGA  
GGAAGCATCGTTGCAGGCTTACTAATTACTTCTAACATTACACCCCTAAAAACCCCT  
GTTATATCTATAACCCCTCTCCTTAACTAGCTGCTCTTGCAGTAACAATCCTTGGCC  
TACTTGTTGCTATGGAACCTCGCCATGCTAACTAATAAGCAACATAAATCAATACCCG  
ACACAACGTACACCACTTCTCCACCTTGTTAGGCTTCTTCCCCGGAGTAATGCACCG  
CCTAGCCCCCTAAATTACTCTTCTTCTAGGCCAAAACGTTGCCAACCACAGTAGA  
TCAAACCTGGCTAGAAAAAATCGGCCCAAAGCCATTGAGTCCTCTAACCGACCCCT  
GATCTCTTCTACAAGTAACATTCAGCGAGGAGTAATCAAGACATATCTCCCCTTTTC  
CTCCTGACACTAGCCCTTATAATCCCCTATTTCATCGCCTAATGACTTTTGCTATATA  
TTAGTTTTATTTTTCTCTCGTGTTAGGGTTAGTTGCAGTTGCTTCTAATCCATCTCCTT  
ATTTTCGCTGCTTTGGGTTTGGTTGTAGTAGCTGGGATGGGGTGTGGTATATTAGTTG  
GGCATGGGGGGCCTTTTTTGTCACTAGTTTTTGTCTTAATTTACTTGGGTGGGATGCT  
AGTTGTATTTGCATACTCCGCAGCGTTAGCTGCTGAGCCGTATCCGGAGAGCTGGGG  
TAGTTGGTCGGTAATGGTTTATGGTAGTTTATACAGGAGGGGTAAATGTAGTTTCTGG  
GCTGTTCTGAGGGGGGTGATACGAGTCGTCTTGGGTCCTAGCAGATGAGTTGGCGG  
AGTTCTCCGTGTTTCGGGGGGATATCGGAGGTGTAGCCTTAATATATTCTTCTGGGG  
GGTGGTTATTAATTATTAGTGCGTGGGTATTGCTTTAACTTTGTTTGTGGTTCTCGA  
GTTGACCGGGGTATAAGTCGAGGGGGCGTTGCGGCAGTTT

Verasper\_moseri\_EF025506

ATGATATTAAGCTTCTTTGACCAATTTATATCCCCAGTATGCCTTGGCATCCCACTAA  
TTGCACTAGCAATTAGCCTACCCTGAATTTTTTTTCCCGGCCCCCCCAAACCGTTGATTA  
AACAAACGCGTGCTAACACTTCAAGGCTGATTTATGAGCAACTTCGCCTCACAACCTC  
CTTTTACCCCTAAACCCTGGTGGTCACAAGTGAGCAATTCTATTTACCTCACTAATGT  
TTTTTTTTTCTATTAATATACTGGGTCTCCTCCCATATACCTTCACACCAACAACCTCA  
ACTCTCGCTTAACCTAGGCTTCGCAGTTCCCCTCTGATTAGCAACTGTCATTATGGAA  
TACGTAATCAACCAACACATGCACTGGGACACCTTCTTCCAGAAGGCACCCCTACTG  
CCCTCATTCCTGTACTTATTATCATCGAGACAATTAGCCTATTCATTGCCCCCTCGC  
TCTCGGTGTTTCGACTCACAGCAAATCTCACAGCGGGCCACTTACTCATTCAACTCAT  
TGCAACGGCTGCCTTCGTCCTTCTTCCCCTAATACCCGTTGTTGCTATCTTAACAACA  
GTAGTCCTCTTCCCTCCTGACTCTACTAGAAATTGCCGTTGCCATGATTCAAGCCTATG  
TCTTCGTCCTACTCCTAAGCCTCTACCTACAAGAAAACGTTTAATGCCTCAACTAAA  
CCCCACACCCTGATTTGCAATTTTAGTTTTCTCTTGAATAATCTTCCCTAGTTGTAATT  
CCCCCAAAAATTTTAGCACACGTCTACCCTAATGAACCCACCTCCCAAAGCACACAA  
AAATAAAACAGAACCCTGAACTGACCATGATATTAAGTGGAATCACACGATGAT  
TTTTCTCGACCAATCACAAAGACATCGGCACCCTCTATCTCGTATTTGGTGCCTGAG  
CCGGAATAGTGGGGACAGGCCTAAGTCTACTCATTTCGAGCAGAACTAAGCCAACCC  
GGGGCTCTCTTGGGGGACGACCAAATTTATAACGTAATCGTCACCGCACACGCCTTT  
GTAATAATCTTCTTTATAGTTATACCCATTATGATCGGAGGATTTCGGGAACCTGACTT  
ATCCCCTTAATAATTGGAGCTCCAGACATGGCCTTCCCTCGAATGAATAACATGAGC  
TTCTGACTTCTTCCCCCCTCATTTCTTCTACTCCTAGCCTCTTCAGGTGTTGAAGCTGG  
GGCAGGAACAGGGTGGACCGTTTATCCTCCACTAGCTGGCAATTTAGCCACGCGCG  
GGGCCTCCGTAGACCTAACAACTTTTCACTTCACCTTGCAGGAATTTTCATCAATTCT  
GGGAGCAATTAACCTTTATTACTACTATCATCAACATAAAACCTACGACAGTAACCTAT  
ATACCAAATTCCATTATTTGTCTGAGCCGTACTAATTACAGCCGTTCTACTTCTTCTT  
TCCCTTCCCGTCTTAGCCGCAGGTATTACAATACTACTAACAGACCGAAACCTTAAC  
ACAACCTTCTTTGACCCCGCCGGAGGGGGTGACCCCATCCTCTATCAACATTTATTC  
TGATTCTTTGGCCACCCGGAAGTATATATTCTCATTCTTCCAGGTTTCGGAATAATTT  
CTCACATCGTAGCATACTACTCAGGTAAGAAAGAACCTTTTGGTTATATAGGAATAG

TCTGAGCTATGATAGCCATTGGACTCCTCGGATTTATTGTATGGGCCCCATCACATGTT  
CACAGTCGGGATAGATGTAGACACACGAGCCTATTTTACCTCTGCCACAATAATCAT  
TGCGATTCCAACCGGCGTAAAAGTCTTTAGTTGACTCGCAACCCTTCATGGAGGAAG  
CATTAATGAGAAACACCACTTCTTTGGGCTCTGGGCTTTATTTTCCTGTTTACAGTA  
GGAGGACTTACCGGCATTGTCTTAGCTAATTCCTCTCTTGATATTGTCCTGCATGACA  
CATACTATGTGGTAGCCCACTTCCACTATGTTCTATCTATGGGGGCTGTATTTGCAAT  
CGTTGCTGCCTTCGTCCACTGATTCCCATTATTTTCAGGCTATAACCCTTCACTCTACA  
TGAACAAAAATTCACTTCGGCCTGATGTTTATTGGGGTTAATCTAACGTTCTTTCCCC  
AACACTTCCTAGGTCTGGCCGGAATACCTCGACGGTACTCAGACTACCCAGACGCTT  
ACACCCTTTGAAATACTGTCTCATCAATCGGATCTCTAATGTCGCTCCTCGCTGTAAT  
TTTATTTTTATTATTATTGAGAAGCATTTACAGCCAAACGAGAAGTTAGCGCAGT  
AGAACTAACTACAATAATTGAATGACTTTACGGCTGCCCCCACCTTACCACAC  
ATTTGAAGAGCCCGCATTTGTTCAAGTCCGAATAAGCTAAATGGCCCATCCCTCACA  
ACTTGGATTCCAAGACGCAGCTTCACCCTTAATAGAAGAACTACTTCACTTCCACGA  
TCACGCCTTAATAATTGTAATTCTTATCAGCACGATAGTACTATATATTATTGCGGCT  
ATAGTCACAGCGAACTTACAGATAAACTTGTCTAGACTCCCAAGAAATTGAGATC  
ATCTGAACAGTTCTCCAGCTGTTATTCTTATCCTCATTGCCCTACCATCCGTCCGGA  
TTTTATACTTAATAGACGAAATTAATGACCCTCACCTGACAATTAAAGCCTTAGGCC  
ATCAGTGGTACTGAAGTTACGAGTATACAGACTACGAAGACCTCGGTTTTGACTCTT  
ACATAATTCTACACAGGACCTTACCCCCGGACAATTCCGACTTCTAGAGGCAGACC  
ACCGAATAGTAATCCCCGTGGAATCTCCAATTCGTGTTCTTATTACAGCTGAAGATG  
TCCTGCATTCTTGAGCAGTCCCCTCGCTGGGCGTAAAAGTCGACGCCGTGCCTGGTC  
GGTTAAACCAAGCAACCTTTATTGTCAGCCGACCAGGCGTATACTTCGGACAATGCT  
CTGAAATCTGCGGGGCAAACCATAGTTTTATGCCCATCGTTGTAGAAGCAGTCCCCC  
TTGAGCACTTCGAAAACCTGGTCTTCCCTAATAATTGAAGATGCCTATGGCCCATCAA  
GCACACCCATACCACATAGTCGACCCAGCCCATGACCCCTCACGGGGGCTATCGCT  
GCCCTATTGATAACATCTGGCCTTGCTATCTGATTTCACTTCCATTCCACTGTTTTAA  
TAACTATCGGAACAATCCTACTTATTTTAACAATCTTCCAGTGATGGCGAGACGTCG  
TACGAGAGGGCACGTTTCAAGGACACCACACTCTTCCTGTTCAAAAAGGCCTCCGGT  
ATGGTATAATCCTATTTATTACCTCAGAAGTTCTATTCTTCCTAGGCTTCTTCTGAGC  
CTTCTACCCTCGAGCCTAGCACCCACCCCTGAATTAGGAGGCTTTTGACCACCAGC  
AGGCATTACACCCCTAGACCCATTTGAAGTCCCCTTCTTAATACAGCAGTCCTCCT  
TGCTTCTGGCGTGACTGTTACCTGAGCACATCACAGCATCATAGAGGGTAAACGAA  
AACAAAGCTATCCACTCTCTTGCTCTTACAATTTTACTTGGGGGATACTTCACTTTTCT  
TCAAGCCCTTGAATATCACGAAGCTCCCTTCACTATTGCAGACGGAGTTTACGGTGC  
TACATTCTTTGTTGCCACTGGCTTCCACGGACTACACGTCTTAATTGGCTCATCATTC  
TTAGCCGTTTGTGTTACGCCAAATTCTCCACCATTTTACATCAAACCACCACTTTG  
GATTTGAAGCAGCCGCATGGTACTGACACTTCGTAGACGTCGTCTGACTCTTCCTGT  
ACATCTCTATTTACTGATGAGGATCTTAATGGCCAGCCTACGCAAATCCCACCCCT  
TCTAAAAATCGCAAACGATGCTTTAATTGACCTCCCTGCCCCCTCTAATATCTCTGTT  
TGATGAAACTTTGGGTCTCTTCTGGGACTTTGCCTGGCTACTCAAATTGTGACCGGCT  
TATTTTTAGCCATACACTATACGTCAGACATTGCTACTGCCTTCACCTCTATTGCACA  
TATCTGCCGGGACGTTAACTACGGTTGGCTTATCCGAAGCATTCATGCCAATGGCGC  
ATCATTCTTTTTCATTTGTATTTACCTTCATATCGGTTCGAGGTCTATATTATGGCTCCT  
ACCTCTATAAAGAAACATGAACATATCGGAGTTGTCCTGCTTCTTCTCGTAATAATGA  
CAGCTTTCGTTGGATACGTTCTCCCTTGGGGACAAATGTCGTTTTGAGGTGCAACCG  
TTATTACCAATCTTCTGTCCGCCATCCCTTATGTCGGTAACACCCTCGTCCAATGAAT  
CTGGGGTGGCTTCTCCGTAGACAATGCTACCCTCACCCGGTTCTTTGCCTTCCACTTC  
CTTTTCCCCTTTATTATCGCAGCCGCAACAGTGATCCATCTTCTCTTCCCTTCACGAAA  
CTGGCTCAAACAACCCACCGGGTTAAATTCAGATTCTGACAAGGTCCCTTTCCACC  
CTTACTTCACTTACAAGGACCTCTTGGCTTTGCAATCCTTCTTGCTGCACTAACATCC  
CTTGCCCTGTTTTCCCCAAACCTTTTAGGGGACCCAGACAACCTTTACCCCTGCAAATC

CACTTGTTACTCCCCACATATCAAGCCAGAATGATACTTCCTTTTTGCTTACGCTAT  
CCTCCGCTCCATCCCCAAACAAGCTTGGAGGCGTACTTGCCCTTTTATTTTCGATTTTA  
GTCTTAATGCTCGTCCCCCTTCTCCATACCTCTAAACAGCGAAGCCTAATATTCGCC  
CTCTAACACAATTCTTATTCTGGTCATTAGTAGCAGACGTTATAATTCTAACTTGAAT  
TGGAGGCATACCTGTAGAACACCCCTTCGTCATCATTGGACAAGTAGCATCACTCCT  
TTATTTTCGCTCTCTTCCTGGTCCTGATCCCAACAGCAGGTTGACTAGAGAACAAAGT  
CCTCGGATGAAAATATGATTTCAACTCTCATTACGCATATTATCAACCCACTAACCT  
TTATTGTACCCGTATTGCTGGCCGTAGCATTCCCTTACCCTCCTTGAACGGAAAGTACT  
AGGCTACATACAACCTCCGTAAAGGGCCAAACATCGTAGGACCTTACGGTCTCCTCCA  
ACCCATTGCTGACGGCCTAAAACCTCTTTATTAAAGAACCCGTTTCGACCTTCAACCGC  
ATCCCCATATCTTGTTCCCTCCTAGCCCCAATGCTCGCACTTACACTAGCCCTTACCCTT  
TGAGCCCCCATACCTTTCCCATACCCCGTCGTAGATCTTAACCTCGGTATTTTATTTA  
TTCTAGCACTGTCTAGCCTTGCAGTGTACTCTATTCTGGGGTCCGGCTGGGCATCCA  
ATTCAAAATATGCCTTAGTGAGGAGCACTTCGGGCGCTTGCACAAACCATTTCCCTACG  
AAGTCAGCCTAGGACTCATCTTACTAAATATCATTATCTTTACTGGGGGCTTCACGC  
TCCAGACCTTTAATACAGCCCAAGAGGCCATCTGACTGGTAGTGCCTGCTTGACCCC  
TAGCTGCCATATGATACATCTCCACTCTTGCCGAAACAAACCGTGCACCCCTTCGACC  
TGACAGAGGGTGAATCCGAACCTTGTTTCAGGCTTCAACGTAGAATACGCAGGCGGA  
CCCTTCGCCCTATTCTTTTTAGCCGAATATTCCAACATCCTCCTAATAAATACTCTGT  
CCGCGACACTATTTTTGGGCGCCTCTCACATTCCATCTATCCCCGAATTAACCAGCAT  
CAATATTATAACTAAAGCAGCCCTTCTATCAATCGTCTTCCTATGGGTCCGAGCTTCC  
TACCCCGGATTCCGTTATGACCAGCTCATACACCTCATCTGAAAAAACTTCCTCCCC  
CTAACTTTAGCTCTGGTTATTTGACACTTAGCGCTTCCCATCGCACTCGCTGGGCTCC  
CCCCACAACCTGTAAATGAACCCCTACATCTTCGCCACCCTTCTATTTGGTTTGGGCTT  
AGGTACAACACTCACGTTTGCAAGCTCACACTGGCTCCTCGCTTGAATGGGCCTTGA  
AATTAATACACTAGCCATCATCCCCCTAATAGCCCAACATCACCACCCACGAGCAGT  
TGAAGCTACTACTAAGTATTTTCTCGCACAAGCCACAGCAGCCGCCACCCTCCTGTT  
TGCGAGTACTACCAACGCTTGACTCACCGGCCAATGGGATATTCAACAGATGACAC  
ACCCGCTCCCCACAACCTATAATTGTTATTGCCCTAGCACTAAAAATTGGACTAGCAC  
CAATACACTCTTGACTTCCAGAGGTTCTTCAAGGACTAGACCTCACCCTGGACTAA  
TCCTCTCGACCTGACAAAAACTTGCCCCCTTTACCCTCTTGTTGCAGATTCAAACAAC  
AATCCTGTACCCCTAATCATTATTGGCTTGCTTTCTACCCTCGTTGGCGGCTGAGGTG  
GCCTTAACCAAACCCAATTACGTAAAATCCTTGCCCTATTCTCAATCGCTCACCTTG  
GCTGAATAGTACTGGTTCTTCAATTTTACCCTCCTCAGTCTCCTCACCTCCTCAC  
GTACTTTCAATGACTTTTTCAACATTCCCTGGTCTTCAAAGTAAACAAGGCTACCACT  
GTCAATACCCTCGCGATCTCGTGAACGAAAACCTCCCGTCCTCACAGCCCTGGCACCT  
CTGGTTTTATTATCTCTGGGCGGCCTTCCCCCTCTTACCGGCTTCATACCCAAGTGAC  
TTATTCTCCAAGAATTGACTAAGCAAGACCTCCCACACTTGCCACCCTCGCTGCATT  
AAGTGCCCTCCTGAGTCTTTACTTCTACTTGCGTCTTTCGTACGCAATAACCCTCACA  
ATATCCCCTAACAACTCATTGGTATTACTCCCTGACGATTCTACTCCCCCAGTTTA  
CACTCCCCCTCGCCGTATCCACTGCAGCAGCCACACTTCTCCTCCCACTAGCACCCAG  
CTGCCGTGGCACTACTCATCACCTATGAGCCTCCTTCTAACCATCCTTTCAATTGCTA  
CTCTCCTCTCAACAGTACTTGCCATTGTATCCTTTTGACTACCCCAAATTATGCCAGA  
CCATGAGAAGCTGTCACCATATGAATGCGGCTTTGACCCTATGGGCTCCGCCCCGACT  
ACCTTTTTCACTGCGATTTTTTCTCATTGCCATCCTTTTTCTTCTCTTCGACCTAGAAA  
TTGCACTCCTCCTCCCCCTCCCCCTGAGGGGACCAACTAGCATCACCCCTACTTACATT  
CACTTGAGCTACAGCTGTCTTAGCCCTCCTAACCCTTGGCCTCATTTATGAATGAGT  
ACAAGGAGGCTTAGAATGAGCTGAATATGCTAAAAATTCTTATTCCAACACTCATAC  
TTATTCCAACAGCCTGATTACTTAAACCCAGCCGACTCTGGCCGATTACCTTAATGT  
ATAGCTTTTGCATCTCCTTGCTTAGCCTCTCGTGAATAAAAAACCTCTCAGAAACCG  
GCTGGTCGTCACTCAACCTATTTATGGCCACCGACTCCCTATCAACCCCCCTCCTCGT  
TCTTACATGCTGACTACTACCACTAATAATCTTAGCAAGTCAAAAGCACACAACCTC



AGAACCCCTAAACCGCCAACGCATATACATTACACTTCTTGCTTCCTCCAGTTCTTCC  
TAATTCTAGCATTTAGCGCCACAGAACTAGTGATGTTCTACGTAATATTTGAGGCCA  
CCCTCATCCCCACACTAATCATTATCACCCGCTGGGGAAACCAAACAGAACGCTTAA  
ATGCGGGGACCTATTTTCTCTTCTACACATTAGCAGGCTCACTTCCTCTCCTCGTTGC  
TTACTCCTGCTTCAAAATACATCCGGCACCTTGTCTTTATTAACCCTCCATTACACA  
AATCCCCTCGCTCTCATCTTACGCAGACAAATTATGATGAGCAGGCTGTCTTCTAGC  
ATTTCTAGTTAAAATACCCCTCTATGGAGTCCACCTCTGACTTCCTAAAGCCCACGTT  
GAAGCCCCAATTGCAGGCTCAATGATCCTTGCAGCAGTTCTTCTAAAACCTAGGAGGA  
TACGGCATGATCCGAATAATAACAATGCTAGAACCTCTAACTAAGGAACTAAGCTA  
CCCATTCAATTGTCTTTGCACTTTGAGGGGTTATTATGACCGGCTCAATTTGCCTACGA  
CAAACGGACCTCAAATCCCTGATTGCCTACTCATCTGTAAGCCACATGGGCCTGGTG  
GCTGGAGGCATTCTTATTCAAGTCACCCTGAGGCTTAACGGGGGCCCTTACCCTTATA  
ATCGCACATGGTCTTACCTCATCAGCCCTGTTCTGCCTGGCAAACACAAACTATGAG  
CGAACCCATAGCCGGACGATAGTCCTAGCACGAGGCCTTCAAGTAGCTCTACCCCTA  
ATAGCCACTTGATGGTTTATTTCTAGCCTAGCCAACCTAGCTCTTCCTCCTCTGCCCCA  
ATCTTATGGGTGAACTAATAATTACTTCCCTATTCAACTGATCCTGATGAACCCT  
AGTACTAACGGGCGGGGGCACTTTAATTACAGCTGGTTATTCCCTTTATATATTCTTA  
ATAACCCAACGAGGCCCTCTCCCGACACATATTATTGCACTTGAACCCTCTCATACC  
CGAGAACACCTTCTTATTGCCTCCACCTAGTCCCCCTAATTCTGCTCGTTCTTAAGCC  
CGAACTGATCTGAGGTTGGACTGCCTATGACCCCCACACACTTTGCCTTCTCCTCAG  
CCTTTTTTCTAGGTTTAAACAGGCCTGGCATTCCACCGGTTCCACCTCCTCTCCGCCCT  
GTTATGCCTTGAAGGAATAATGTTATCCCTGTTTATTGCTCTCTCCCTATGAACACTC  
CAACTCGACTCAACCAACTTCTCAGCATCTCCTATGCTCCTACTTGCATTTTCAGCCT  
GTGAGGCAAGCGCCGGCCTCGCCCTACTGGTAGCCACCGCTCGAACCCACGGAACC  
GACCGACTACAAAGCCTAAATCTTCTCCAATGCTAAATGTACCCTACCTCCCTAATG  
ATTTCTCAAGCCTAATCACAATCTTTGCACTACTGGCTTATCCTCTAGTTACTACGA  
TTCAACCTGCACCTCGAGACCCTCAATGGGCTTCTACCCATGTCAAAACAGCTGTAA  
AAATAGCCTTCTTTGTGAGCCTATTACCCCTGGCCCTCTTTCTCCATGAAGGTGCCGA  
GACAATCATTACTAACTGAACCTGAATAAACACTAATTCCTTCAACATCACTATCAG  
CCTAAAATTTGACTTCTACTCAATTATTTTTACACCCATTGCCCTTTACGTTACTTGA  
TCCATTTTAGAATTTCGCATCATGGTACATGCACGCAGACCCACAAATGAACCGCTTC  
TTAAATACCTCCTGACATTTCTGATTGCCATGATTATCCTGGTAACTGCAAACAAC  
ATATTCCAATATTTATCGGTTGAGAGGGTGTGGGAATTATGTCATTTCTCCTTATCG  
GATGGTGGTTCGGACGGGCAGATGCTAACACCGCAGCGCTTCAAGCAGTACTCTAT  
AACCGTGTGGGAGATATCGGACTTATCTTCGCTATGGCTTGAATAGCAGCAAACCTA  
AACTCCTGGGAAATACAACAAGTCTTTGCAGCCTCTAAGGACATAGACTTAACCTAC  
CCTCTCCTCGGGCTAATTATCGCAGCGACTGGCAAATCAGCCCAGTTTGGACTTCAC  
CCCTGACTACCCTCCGCTATGGAGGGTCCCACACCGGTCTCTGCCCTACTTCACTCTA  
GCACCATAGTCGTTGCCGGCATTTCCTGCTAGTACGAATGAGCCCCCTTTTGGAAA  
ACAACCCAACAGCCCTCACAACCTGCCTCTGCCTCGGAGCCCTCACAACATTATTTA  
CCGCAACCTGTGCCCTCACACAAAATGATATCAAGAAAATCATCGCATTTTCTACAT  
CCAGCCAGCTCGGACTCATAATGGTAACCATCGGACTAAACCAACCGCAACTAGCA  
TTCCTGCACATTTGCACACACGCCTTCTTCAAAGCCATACTATTCTTGTGCTCCGGAT  
CTATTATCCACAGCCTGAATGACGAACAAGACATTCGAAAAATGGGGGGGCATACAC  
CACCTTGCGCCTTATTCATCCTCCTGCCTAACTATTGGCAGCCTCGCCCTCACAGGGA  
CCCCCTTCTTGGCTGGTTTCTTCTCTAAAGATGCCATTATCGAAGCATTAAACACATC  
CCACCTGAACGCCTGAGCCCTCACCTTAACCCTTCTAGCTACCTCTTTCACAGCAATT  
TACAGCTTTCGAGTAATATTCTTTGTTCCCATAGGCTACCCCCGATTCACTGCCTTTC  
CCCAATCAACGAAAACAATCCAGCAGTAATCAACCCACTTAAACGACTAGCATGAG  
GGAGCATCATTGCAGGCTTACTTATTACCTCTAACATTACACCCCTAAAAACCCCTA  
TTATGTCTATACCCCTCTCCTTAAACTAGCTGCTCTTGCAGTTACAATTGCTGGCCT  
ACTTGTGGCCATAGAACTCGCCATATTAATAAAGCAATACAAACCGATACCCG

GCACAATATTCACCACTTCTCCGCCTTACTAGGCTTCTTCCCCGGAGTTATGCATCGC  
CTAACCCCTGTACTAGTCTTCTTTATAGGCCAAGACGTTGCCAACCAAACAGTAGAT  
CAAACCTGACTAGAAAAAACGGGCCCCAAAGCCATCGAGTCCTCTAACAAACCCCT  
GGTCTCTTCTACAAGTAACATCCAACGAGGAGTAATCAAAACATATCTCCCCTCTTC  
CTTCTAACACTAGCCCTTATAATCCCAATATTTATTACCTAATGACTTTTGTTATGTA  
CTTAGTTTTATTTTCTTTTGTGTTAGGGTTAGTTGCAGTTGCTTCTAATCCGTCTCCTT  
ATTTTGCTGCTTTGGGTTTGGTTGTGGTAGCTGGTATGGGATGTGGTGTACTAGTTGG  
GCATGGGGGGCCTTTTTTATCATTAGTTTTATTCTTAATTTATTTGGGCGGGATGTTA  
GTTGTATTTGCATATTCAGCAGCATTAGCTGCTGAGCCGTACCCGGAGAGCTGGGGT  
AGTTGGTCGGTACTGGTTTATGGTCGTTTACACAGGAGGGGTAATGTAGTCTCAGGG  
TTGTTTTGAGGGGGGTGGTATGAATCGTCTTGGGTTTTAGCAGACGAGCTCGCGGAG  
TTTTCCGTGTTTCGGGGGGATATTGGAGGTGTTGCCTTAATATACTCTTCTGGGGGGT  
GGTTGCTAATCATTAGTGCGTGGGTACTACTCTTAACCCTATTTGTAGTTCTTGAGTT  
AACCGGGGAATAAGTCGAGGAGCGCTGCGGCGGTTA

Verasper\_moseri\_LC583747

ATGATATTAAGCTTCTTTGACCAATTTATATCCCCAGTATGCCTTGGCATCCCCTAA  
TTGCACTAGCAATTAGCCTACCCTGAATTTTTTTTCCCGGCCCCCCCAAACCGTTGATTA  
AACAAACCGCGTGCTAACACTTCAAGGCTGATTTATGAGCAACTTCGCCTCACAACTC  
CTTTTACCCCTAAACCCTGGTGGTCACAAGTGAGCAATTCTATTTACCTCACTAATGT  
TTTTTTTTTCTATTAATATACTGGGTCTCCTCCCATATACCTTCACACCAACAACCTCA  
ACTCTCGCTTAACCTAGGCTTCGCAGTTCCCCTCTGATTAGCAACTGTCATTATGGAA  
TACGTAATCAACCAACACATGCACTGGGACACCTTCTTCCAGAAGGCACCCCTACTG  
CCCTCATTCCTGTACTTATTATCATCGAGACAATTAGCCTATTCATTGCCCCCTCGC  
TCTCGGTGTTTCGACTTACAGCAAATCTCACAGCGGGCCACTTACTCATTCAACTCAT  
TGCAACGGCTGCCTTCGTCCTTCTTCCCCTAATACCCGTTGTTGCTATCTTAACAACA  
GTAGTCCTCTTCCCTCCTGACTCTACTAGAAATTGCCGTTGCCATGATTCAAGCCTATG  
TCTTCGTCCTACTCCTAAGCCTCTACCTACAAGAAAACGTTTAAATGCCTCAACTAAA  
CCCCACACCCTGATTTGCAATTTTAGTTTTCTCTTGAATAATCTTCCTAGTTGTAATT  
CCCCCAAAAATTTTAGCACACGTCTACCCTAATGAACCCACCTCCCAAAGCACACAA  
AAATAAAACAGAACCCCTGAAACTGACCATGATATTAAGTGGAATCACACGATGAT  
TTTTCTCGACCAATCACAAAGACATCGGCACCCTCTATCTCGTATTTGGTGCCTGAG  
CCGGAATAGTGGGGACAGGCCTAAGTCTACTCATTTCGAGCAGAACTAAGCCAACCC  
GGGGCTCTCTTGGGGGACGACCAAATTTATAACGTAATCGTCACCGCACACGCCTTT  
GTAATAATCTTCTTTATAGTTATACCCATTATGATCGGAGGATTCGGGAACCTGACTT  
ATCCCCTTAATAATTGGAGCTCCAGACATGGCCTTCCCTCGAATGAATAACATGAGC  
TTCTGACTTCTTCCCCCCTCATTTCTTCTACTCCTAGCCTCTTCAGGTGTTGAAGCTGG  
GGCAGGAACAGGGTGGACCGTTTATCCTCCACTAGCTGGCAATTTAGCCACGCGG  
GGGCCTCCGTAGACCTAACAATCTTTTCACTTCACCTTGCAGGAATTTTCATCAATTCT  
GGGAGCAATTAACCTTTATTACTACTATCATCAACATAAAACCTACGACAGTAACTAT  
ATACCAAATTCCATTATTTGTCTGAGCCGTACTAATTACAGCCGTTCTACTTCTTCTT  
TCCCTTCCCGTCTTAGCCGCAGGTATTACAATACTACTAACAGACCGAAACCTTAAC  
ACAACCTTCTTTGACCCCGCCGGAGGGGGTGACCCCATCCTCTATCAACATTTATTC  
TGATTCTTTGGCCACCCGGAAGTATATATTCTCATTCTTCCAGGTTTCGGAATAATTT  
CTCACATCGTAGCATACTACTCAGGTAAGAAAGAACCTTTTGGTTATATAGGAATAG  
TCTGAGCTATGATAGCCATTGGACTCCTCGGATTTATTGTATGGGCCCATCACATGTT  
CACAGTCGGGATAGATGTAGACACACGAGCCTATTTTACCTCTGCCACAATAATCAT  
TGCGATTCCAACCGGCGTAAAAGTCTTTAGTTGACTCGCAACCCTTCATGGAGGAAG  
CATTAATGAGAAACACCACTTCTTTGGGCTCTGGGCTTTATTTTCTGTGTTACAGTA  
GGAGGACTTACCGGCATTGTCTTAGCTAATTCCTCTCTTGATATTGTCCTGCATGACA  
CATACTATGTGGTAGCCCACTTCCACTATGTTCTATCTATGGGGGCTGTATTTGCAAT  
CGTTGCTGCCTTCGTCCACTGATTCCCATTAATTTTCAGGCTATACCCTTCACTCTACA  
TGAACAAAAATTCACTTCGGCCTGATGTTTATCGGGGTAAATCTAACGTTCTTTCCCC

AACACTTCCTAGGTCTGGCCGGAATACCTCGACGGTACTCAGACTACCCAGACGCTT  
ACACCCTTTGAATACTGTCTCATCAATCGGATCTCTAATGTCGCTCCTCGCTGTAAT  
TTTATTTTTATTATTATTGAGAAGCATTTACAGCCAAACGAGAAGTTAGCGCAGT  
AGAACTAACTACAATAATTGAATGACTTTACGGCTGCCCCCACCTTACCACAC  
ATTTGAAGAGCCCGCATTTGTTCAAGTCCGAATAAGCTAAATGGCCCATCCCTCACA  
ACTTGGATTCCAAGACGCAGCTTCACCCCTTAATAGAAGAACTACTTCACTTCCACGA  
TCACGCCTTAATAATTGTAATTCTTATCAGCACGATAGTACTATATATTATTGCGGCT  
ATAGTCACAGCGAACTTACAGATAAACTTGTCTAGACTCCCAAGAAATTGAGATC  
ATCTGAACAGTTCTCCCAGCTGTTATTCTTATCCTCATTGCCCTACCATCCGTCCGGA  
TTTTATACTTAATAGACGAAATTAATGACCCTCACCTGACAATTAAGCCTTAGGCC  
ATCAGTGGTACTGAAGTTACGAGTATACAGACTACGAAGACCTCGGTTTTGACTCTT  
ACATAATTCCTACACAGGACCTTACCCCCGGACAATTCCGACTTCTAGAGGCAGACC  
ACCGAATAGTAATCCCCGTGGAATCTCCAATTCGTGTTCTTATTACAGCTGAAGATG  
TCCTGCATTCTTGAGCAGTCCCCTCGCTGGGCGTAAAAGTCGACGCCGTGCCTGGTC  
GGTTAAACCAAGCAACCTTTATTGTCAGCCGACCAGGCGTATACTTCGGACAATGCT  
CTGAAATCTGCGGGGCAAACCATAGTTTTATGCCCATCGTTGTAGAAGCAGTCCCCC  
TTGAGCACTTCGAAAACCTGGTCTTCCCTAATAATTGAAGATGCCTATGGCCCATCAA  
GCACACCCATACCACATAGTCGACCCCAGCCCATGACCCCTCACGGGGGCTATCGCT  
GCCCTATTGATAACATCTGGCCTTGCTATCTGATTTCACTTCCATTCCACTGTTTTAA  
TAACTATCGGAACAATCCTACTTATTTTAAACAATCTTCCAGTGATGGCGAGACGTG  
TACGAGAGGGCACATTTCAAGGACACCACACTCTTCCTGTTCAAAAAGGCCTCCGGT  
ATGGTATAATCCTATTTATTACCTCAGAAGTTCTATTCTTCCTAGGCTTCTTCTGAGC  
CTTCTACCACTCGAGCCTAGCACCCACCCCTGAATTAGGAGGCTTTTGACCACCAGC  
AGGCATTACACCCCTAGACCCATTTGAAGTCCCCTTCTTAATACAGCAGTCCCTCT  
TGCTTCTGGCGTGTCTGTTACCTGATCACATCACAGCATCATAGAGTGTAACGAAA  
ACAAGCTATCCACTCTCTTGCCCTTACAATTTTACTTGGGGGATACTTCACTTTTCTT  
CAGGCTCTTGAATATCACGAAGCTCCCTTCACTATTGCTGACGGAGTTTACGGTGCT  
ACATTCTTTGTTGCCACTGGCTTCCACGGACTACACGTCTTAATTGGCTCATCATTCT  
TAGCCGTTTGTGTTGTTACGCCAAATTCTCCACCATTTTACATCAAACCACCACTTTGG  
ATTTGAAGCAGCCGCATGGTACTGACACTTCGTAGACGTCGTCTGACTCTTCCTGTA  
CATCTCTATTTACTGATGAGGATCTTAATGGCCAGCCTACGCAAATCCCACCCCCTT  
CTAAAAATCGCAAACGATGCTTTAATTGACCTCCCTGCCCCCTCTAATATCTCTGTTT  
GATGAAACTTTGGGTCTCTTCTGGGACTTTGCCTGGCTACTCAAATTGTGACCGGCTT  
ATTTTATAGCCATACACTATACGTCAGACATTGCTACTGCCTTCACCTCTATTGCACAT  
ATCTGCCGGGACGTTAACTACGGTTGGCTTATCCGAAGCATTTCATGCCAATGGCGCA  
TCATTCTTTTTTCACTTGTATTTACCTTCATATCGGTCGAGGTCTATATTATGGCTCCTA  
CCTCTATAAAGAAACATGAACTATCGGAGTTGTCCTGCTTCTTCTCGTAATAATGAC  
AGCTTTCGTTGGATACGTTCTCCCTTGGGGACAAATGTCGTTTTGAGGTGCAACCGT  
TATTACCAATCTTCTGTCCGCCATCCCTTATGTCGGTAACACCCTCGTCCAATGAATC  
TGGGGTGGCTTCTCCGTAGACAATGCTACCCTCACCCGGTTCTTTGCCTTCCACTTCC  
TTTTCCCTTTTATTATCGCAGCCGCAACAGTGATCCATCTTCTCTTCCCTTACGAAAC  
TGGCTCAAACAACCCACCGGGTTAAATTGAGATTCTGACAAGGTCCCTTTCCACCC  
TACTTCACTTACAAGGACCTCTTGGCTTTGCAATCCTTCTTGCTGCACTAACATCCC  
TTGCCCTGTTTTCCCCAAACCTTTTAGGGGACCCAGACAACCTTTACCCCTGCAAAATCC  
ACTTGTTACTCCCCACATATCAAGCCAGAATGATACTTCCTTTTTGCTTACGCTATC  
CTCCGCTCCATCCCAAACAAGCTTGGAGGCGTACTTGCCCTTTTATTTTCGATTTTAG  
TCCTAATGCTCGTCCCCCTTCTCCATACCTCTAAACAGCGAAGCCTAATATTCCGCCC  
TCTAACACAATTCTTATTCTGGTCACTAGTAGCAGACGTTATAATTCTAACTTGAATT  
GGAGGCATACCTGTAGAACACCCCTTCGTATCATTGGACAAGTAGCATCACTCCTT  
TATTTGCTCTCTTCTGCTGCTGATCCCAACAGCAGGTTGACTAGAGAACAAAGTC  
CTCGGATGAAAATATGATTTCAACTCTCATTACGCATATTATCAACCCACTAACCTTT  
ATTGTACCCGTATTGCTGGCCGTAGCATTCTTACCCTCCTTGAACGGAAAGTACTA

GGCTACATACAACCTCCGTAAAGGGCCAAACATCGTAGGACCTTACGGTCTCCTCCAA  
CCCATTGCTGACGGCCTAAACTCTTTATTAAAGAACCCGTTTCGACCTTCAACCGCA  
TCCCCCATCTTGTTCTCCTAGCCCCAATGCTCGCACTTACACTAGCCCTTACCCTTT  
GAGCCCCCATACCTTTCCCATACCCCGTCTGCTAGATCTTAACCTCGGTATTTTATTTAT  
TCTAGCACTGTCTAGCCTTGCAGTGTACTCTATTCTGGGGTCCGGCTGGGCATCCAA  
TTCAAATATGCCTTAGTGGGAGCACTTCGGGGCCGTTGCACAAACCATTTCTACGA  
AGTCAGCCTAGGACTCATCTTACTAAATATCATTATCTTTACTGGGGGCTTCACGCTC  
CAGACCTTTAATACAGCCCAAGAGGGCCATCTGACTGGTAGTGCCTGCTTGACCCCTA  
GCTGCCATATGATACATCTCCACTCTTGCCGAAACAAACCGTGCACCCTTCGACCTG  
ACAGAGGGTGAATCCGAACCTTGTTTCAGGCTTCAACGTAGAATACGCAGGCGGACC  
CTTCGCCCTATTCTTTTTAGCCGAATATTCCAACATCCTCCTAATAAATACTCTGTCC  
GCGACACTATTTTTGGGCGCCTCTCACATTCCATCTATCCCCGAATTAACCAGCATC  
AATATTATAACTAAAGCAGCCCTTCTATCAATCGTCTTCCTATGGGTCCGAGCTTCCT  
ACCCCCGATTCCGTTATGACCAGCTCATACACCTCATCTGAAAAAACTTCCTCCCC  
TAACTTTAGCTCTGGTTATTTGACACTTAGCGCTTCCCATCGCACTCGCTGGGCTCCC  
CCCACAACCTGTAAATGAACCCCTACATCTTCGCCACCCTTCTATTTGGTTTGGGCTTA  
GGTACAACACTCACGTTTGCAAGCTCACACTGGCTCCTCGCTTGAATGGGCCTTGAA  
ATTAATACACTAGCCATCATCCCCCTAATAGCCCAACATCACCACCCACGAGCAGTT  
GAAGCTACTACTAAGTATTTTCTCGCACAAGCCACAGCAGCCGCCACCCTCCTGTTT  
GCGAGTACTACCAACGCTTGACTCACCGGCCAATGGGATATTCAACAGATGACACA  
CCCGCTCCCCACAACCTATAATTGTTATTGCCCTAGCACTAAAAATTGGACTAGCACC  
AATACACTCTTGACTTCCAGAGGTTCTTCAAGGACTAGACCTCACCCTGGACTAAT  
CCTCTCGACCTGACAAAAACTTGCCCCCTTTGCCCTCTTGTTGCAGATTCAAACAAC  
AATCCTGTGCCCTAATCATTATTGGCTTGCTTTCTACCCTCGTTGGCGGCTGAGGTG  
GCCTTAACCAAACCCAATTACGTAAAATCCTTGCCTATTCTCAATCGCTCACCTTG  
GCTGAATAGTACTGGTTCTTCAATTTTACCCTCCTCAGTCTCCTCACCTCCTCAC  
GTACTTTCAATGACTTTTTCAACATTCTTGGTCTTCAAAGTAAACAAGGCTACCACT  
GTCAATACCCTCGCGATCTCGTGAACGAAAACCTCCCGTCTCCTCACAGCCCTGGCACCT  
CTGGTTTTATTATCTCTGGGCGGCCTTCCCCCTCTTACCGGCTTCATACCCAAGTGAC  
TTATTCTCCAAGAATTGACTAAGCAAGACCTCCCACACTTGCCACCCTCGCTGCATT  
AAGTGCCCTCCTGAGTCTTTACTTCTACTTGCGTCTCTCGTACGCAATAACCCTCACA  
ATATCCCCTAACAACCTCATTGGTATTACTCCCTGACGATTCTACTCCCCCAGTTTA  
CACTCCCCCTCGCCGTATCCACTGCAGCAGCCACACTTCTCCTCCCACTAGCACCAG  
CTGCCGTGGCACTACTCATCACCTATGAGCCTCCTTCTAACCATCCTTTCAATTGCTA  
CTCTCCTCTCAACAGTACTTGCCATTGTATCCTTTTGACTACCCCAAATTATGCCAGA  
CCATGAGAAGCTGTCACCATATGAATGCGGCTTTGACCCTATGGGCTCCGCCCAGCT  
ACCTTTTTCACTGCGATTTTTTCTCATTGCCATCCTTTTTCTTCTCTTCGACCTAGAAA  
TTGCACTCCTCCTCCCCCTCCCCCTGAGGGGACCAACTAGCATCACCCCTACTTACATT  
CACTTGAGCTACAGCTGTCTAGCCCTCCTAACCCTTGGCCTCATTTATGAATGAGT  
ACAAGGAGGCTTAGAATGAGCTGAATATGCTAAAAATTCTTATTCCAACACTCATAC  
TTATTCCAACAGCCTGATTACTTAAACCCAGCCGACTCTGGCCGATTACCTTAATGT  
ATAGCTTTTGCATCTCCTTGCTTAGCCTCTCGTGACTAAAAAACCTCTCAGAAACCG  
GCTGGTCGTCACCTAACCTATTTATGGCCACCGACTCCCTATCAACCCCCCTCCTCGT  
TCTTACATGCTGACTACTACCACTAATAATCTTAGCAAGTCAAAGCACACAACCTC  
AGAACCCCTAAACCGCCAACGCATATACATTACACTTCTTGCTTCCTCCAGTTCTTCC  
TAATTCTAGCATTTAGCGCCACAGAACTAGTGATGTTCTACGTAATATTTGAGGCCA  
CCCTCATCCCCACACTAATCATTATCACCCGCTGGGGGAACCAACAGAACGCTTAA  
ATGCGGGGACCTATTTTCTTCTACACATTAGCAGGCTCACTTCCTCTCCTCGTTGC  
TTTACTCCTGCTTCAAATAACATCCGGCACCTTGCTTTTATTAACCCTCCATTACACA  
AATCCCCTCGCTCTCATCTTACGCAGACAAATTATGATGAGCAGGCTGTCTTCTAGC  
ATTTCTAGTTAAATAACCCCTCTATGGAGTCCACCTCTGACTTCCTAAAGCCCACGTT  
GAAGCCCCAATTGCAGGCTCAATGATCCTTGCAGCAGTTCTTCTAAACTAGGAGGA

TACGGCATGATCCGAATAATAACAATGCTAGAACCTCTAACTAAGGAACTAAGCTA  
CCCATTTCATTGTCTTTGCACTTTGAGGGGTTATTATGACCGGCTCAATTTGCCTACGA  
CAAACGGACCTCAAATCCCTGATTGCCTACTCATCTGTAAGCCACATGGGCCTGGTG  
GCTGGAGGCATTCTTATTTCAGTCACCCTGAGGCTTAACGGGGGGCCCTTACCCTTATA  
ATCGCACATGGTCTTACCTCATCAGCCCTGTTCTGCCTGGCAAACACAACTATGAG  
CGAACCCATAGCCGGACGATAGTCCTAGCACGAGGCCTTCAAGTAGCTCTACCCCTA  
ATAGCCACTTGATGGTTTATTTCTAGCCTAGCCAACCTAGCTCTTCCTCCTCTGCCCA  
ATCTTATGGGTGAACTAATAATTACTTCCCTATTCAACTGATCCTGATGAACCCT  
AGTACTAACGGGCGGGGGCACTTTAATTACAGCTGGTTATTCCCTTTATATATTCTTA  
ATAACCCAACGAGGCCCTCTCCCGACACATATTATTGCACTTGAACCCTCTCATAACC  
CGAGAACACCTTCTTATTGCCTCCACCTAGTCCCCCTAATTCTGCTCGTTCTTAAGCC  
CGAACTGATCTGAGGTTGGACTGCCTATGACCCCCACACACTTTGCCTTCTCCTCAG  
CCTTTTTTCTAGGTTTAAACAGGCCTGGCATTCCACCGGTTCCACCTCCTCTCCGCCCT  
GTTATGCCTTGAAGGAATAATGTTATCCCTGTTTATTGCTCTCTCCCTATGAACACTC  
CAACTCGACTCAACCAACTTCTCAGCATCTCCTATGCTCCTACTTGCATTTTCAGCCT  
GTGAGGCAAGCGCCGGCCTCGCCCTACTGGTAGCCACCGCTCGAACCACGGAACC  
GACCGACTACAAAGCCTAAATCTTCTCCAATGCTAAATGTACCCTACCTCCCTAATG  
ATTTCTCAAGCCTAATCACAATCTTTGCACTACTGGCTTATCCTCTAGTTACTACGA  
TTCAACCTGCACCTCGAGACCCTCAATGGGCTTCTACCCATGTCAAAACAGCTGTAA  
AAATAGCCTTCTTTGTCAGCCTATTACCCCTGGCCCTCTTTCTCCATGAAGGTGCCGA  
GACAATCATTACTAACTGAACCTGAATAAACACTAATTCCTTCAACATCACTATCAG  
CCTAAAATTTGACTTCTACTCAATTATTTTTACACCCATTGCCCTTTACGTTACTTGA  
TCCATTTTAGAATTCGCATCATGGTACATGCACGCAGACCCACAAATGAACCGCTTC  
TTTAAATACCTCCTGACATTTCTGATTGCCATGATTATCCTGGTAACTGCAAACAAC  
ATATTCCAACATTTTATCGGTTGAGAGGGTGTGGGAATTATGTCATTTCTCCTTATCG  
GATGGTGGTTCGGACGGGCAGATGCTAACACCGCAGCGCTTCAAGCAGTACTCTAT  
AACCGTGTGGGAGATATCGGACTTATCTTCGCTATGGCTTGAATAGCAGCAAACCTA  
AACTCCTGGGAAATACAACAAGTCTTTGCAGCCTCTAAGGACATAGACTTAACCTAC  
CCTCTCCTCGGGCTAATTATCGCAGCGACTGGCAAATCAGCCCAGTTTGGACTTCAC  
CCCTGACTACCTCCGCTATGGAGGGTCCACACCGGTCTCTGCCCTACTTCACTCTA  
GCACCATAGTCGTTGCCGGCATTTCCTGCTAGTACGAATGAGCCCCCTTTTGGA  
ACAACCCAACAGCCCTCACAACCTTGCTCTGCCTCGGAGCCCTCACAACATTATTTA  
CCGCAACCTGTGCCCTCACACAAAATGATATCAAGAAAATCATCGCATTTTCTACAT  
CCAGCCAGCTCGGACTCATAATGGTAACCATCGGACTAAACCAACCGCAACTAGCA  
TTCCTGCACATTTGCACACACGCCTTCTTCAAAGCCATACTATTCTTGTGCTCCGGAT  
CTATTATCCACAGCCTGAATGACGAACAAGACATTCGAAAAATGGGGGGCATAACAC  
CACCTTGCGCCTTATTCATCCTCCTGCCTAACTATTGGCAGCCTCGCCCTCACAGGGA  
CCCCCTTCTTGGCTGGTTTCTTCTCTAAAGATGCCATTATCGAAGCATTAAACACATC  
CCACCTGAACGCCTGAGCCCTCACCTTAACCCTTCTAGCTACCTCTTTCACAGCAATT  
TACAGCTTTTCGAGTAATATTCTTTGTTCCCATAGGCTACCCCCGATTCACTGCCTTTC  
CCCAATCAACGAAAACAATCCAGCAGTAATCAACCCACTTAAACGACTAGCACGAG  
GGAGCATCATTGCAGGCTTACTTATTACCTCTAACATTACACCCCTAAAAACCCCTA  
TTATGTCTATACCCCCTCTCCTTAAACTAGCTGCTCTTGCAGTTACAATTGCTGGCCT  
ACTTGTGGCCATAGAACTCGCCATATTAATAATAAGCAATACAAACCGATACCCG  
GCACAATATTCACCACTTCTCCGCCTTACTAGGCTTCTTCCCCGGAGTTATGCATCGC  
CTAACCCCTGTACTAGTCTTCTTTATAGGCCAAGACGTTGCCAACCACAGTAGAT  
CAAACCTGACTAGAAAAACGGGGCCCCAAAGCCATCGAGTCCTCTAACAAACCCCT  
GGTCTCTTCTACAAGTAACATCCAACGAGGAGTAATCAAAACATATCTCCCTCTTC  
CTTCTAACACTAGCCCTTATAATCCCAATATTTATTACCTAATGACTTTTGTATGTA  
CTTAGTTTTATTTTCTTTTGTGTTAGGGTTAGTTGCAGTTGCTTCTAATCCGTCTCCTT  
ATTTTGCTGCTTTGGGTTTGGTTGTGGTAGCTGGTATGGGATGTGGTGTACTAGTTGG  
GCATGGGGGGCCTTTTTTATCATTAGTTTTATTCTTAATTTATTTGGGCGGGATGTTA

GTTGTATTTGCATATTCAGCAGCATTAGCTGCTGAGCCGTACCCGGAGAGCTGGGGT  
AGTTGGTCGGTACTGGTTTATGGTCGTTTACACAGGAGGGGTAATGTAGTCTCAGGG  
TTGTTTTGAGGGGGGGTGGTATGAATCGTCTTGGGTTTTAGCAGACGAGCTCGCGGAG  
TTTTCCGTGTTTCGGGGGGGATATTGGAGGTGTTGCCTTAATACTCTTCTGGGGGGT  
GGTTGCTAATCATTAGTGCGTGGGTACTACTCTTAACCCTATTTGTAGTTCTTGAGTT  
AACCGGGGAATAAGTCGAGGAGCGCTGCGGCGGTTA

Verasper\_variegatus\_DQ403797

ATGGTATTAAGCTTCTTTGACCAATTTATATCCCCAGTATGCCTTGGCATCCCACTAA  
TTGCACTAGCAATTAGCCTGCCCTGAATTTTTTTCCAGCCCCAAAAACCGTTGATTA  
AACAACCGCCTGTAAACCCTTCAAGGCTGATTTATGAGCAACTTCACCTCACAACCTC  
CTTTTACCCCTAAACCCCGGTGGTCACAAGTGAGCAATTCTGTTTACCTCACTAATGT  
TTTTTTCTTCTATCAATATACTGGGTCTCCTTCCATACACCTTTACACCAACAACCTCA  
ACTCTCCCTAAACCTAGGCTTCGCAGTGCCCTCTGATTAGCAACTGTCATTATGGG  
ATACGCAATCAACCAACACATGCACTAGGACACCTTCTTCCAGAAGGTACGCCCCGCT  
GCCCTCATTCCCGTACTTATTATTATCGAAACAATTAGCCTATTCATTGCCCCCTCG  
CTCTCGGTGTTTCGACTTACAGCAAATCTCACGGCAGGCCACTTACTCATTCAACTCA  
TTGCAACAGCTGCCTTTGTCCTTCTTCCCCTAATAACCCGTTGTTGCTGTCCTAACAAC  
AGTAGTCCTCTTCCTCCTGACTCTGCTAGAAATCGCCGTTGCCATGATTCAAGCCTAT  
GTCTTCGTCTCTACTCCTAAGCCTTTACCTACAAGAAAACGTTTAATGCCTCAACTGA  
ACCCCGCACCCCTGATTTGCAATTTTAGTTTTCTCTTGAATAATCTTCCTAGTTGTAAT  
CCCCCTAAAATTTTAGCACACATCTACCCTAATGAGCCCACCTCCCAAAGCACACA  
AAAATAAAACAGAATCCTGAAACTGACCATGGTATTAAGTGGCAATCACACGTTGA  
TTTTTCTCGACCAATCACAAAGACATCGGCACCCTCTATCTCGTATTTGGTGCCTGAG  
CCGGAATAGTGGGGACAGGCCTTAGTCTACTTATTCGAGCAGAACTAAGCCAACCC  
GGGGCTCTCTTGGGGGACGACCAGATTTATAACGTAATCGTCACCGCACACGCCTTT  
GTAATAATCTTCTTTATAGTTATACCCATTATGATCGGAGGATTCGGAAACTGACTT  
ATTCCATTAATAATTGGAGCCCCAGACATGGCCTTCCCTCGAATGAATAACATGAGC  
TTCTGACTTCTTCCCCCCTCATTTCTTCTACTCCTAGCCTCTTCAGGTGTTGAAGCTGG  
GGCAGGAACAGGGTGAACCGTTTATCCTCCACTAGCTGGCAATTTAGCCACGCCG  
GGGCCTCCGTAGACCTAACAATCTTTTCACTTCACCTTGCAGGAATTTTCATCAATTCT  
GGGAGCAATTAACCTTTATTACTACTATCATCAACATAAAACCTACGACAGTAACTAT  
GTACCAAATCCCGTTATTTGTCTGAGCCGTAATAATTACAGCCGTCCTACTTCTTCTT  
TCCCTTCCCGTCTTAGCCGCAGGAATTACAATGCTACTGACGGACCGAAACCTTAAC  
ACGACCTTCTTTGACCCTGCCGGAGGGGGTGACCCTATCCTCTATCAACATTTATTCT  
GATTCTTTGGTACCCCGGAAGTATATATCCTCATTCTTCCAGGTTTCGGAATAATTTTC  
TCACATCGTAGCATACTATTAGGTAAGAAAGAACCTTTTGGTTATATGGGGATGGT  
GTGAGCTATAATGGCCATCGGACTCCTCGGATTTATCGTATGGGCCCATCACATGTT  
CACAGTCGGTATAGATGTAGACACACGAGCCTATTTTACCTCTGCCACAATAATTAT  
TGCGATTCCAACCGGCGTAAAAGTCTTTAGTTGGCTCGCAACCCTTCATGGGGGAAG  
CATTAAATGAGAGACACCACTTCTTTGGGCGCTGGGCTTTATTTTCTGTTTACAGTA  
GGAGGACTAACCGGCATTGTCTTAGCTAATTCTTCTCTTGATATTGTCCTACATGATA  
CATACTATGTAGTAGCTCACTTCCACTATGTTCTATCCATAGGAGCTGTATTTGCAAT  
CGTTGCTGCCTTCGTCCACTGATTCCCATTATTTTCGGGCTATACCCTTCACTCTACA  
TGAACAAAAAATTCACTTCGGCCTGATGTTTATTGGGGTCAATCTAACATTCTTCCCCC  
AACACTTCCTAGGTCTGGCCGGAATACCTCGACGGTACTCAGACTACCCAGACGCTT  
ACACCCTTTGAAATACTGTCTCATCAATTGGATCCCTAATGTCGCTTATCGCTGTAAT  
TTATTTTTTATTATTATTGAGAAGCATTTACAGCCAAACGAGAAGTTAGCGCAGT  
AGAACTAACTTCAACTAATATTGAATGACTCTACGGCTGCCCCCACCTTATCACAC  
ATTTGAAGAACCCGCATTTGTTCAAGTTCGAATTAATAATGGCTCATCCCTCACA  
ACTCGGATTTCAAGACGCAGCTTCACCCTTAATAGAAGAACTACTTCACTTCCACGA  
CCACGCCTTAATAGTTGTTATTCTTATTAGCACGATAGTACTATATATTATTGCCGCT  
ATAGTCACAGCGGAACCTTACAGATAAACTTGTTCTAGACTCCCAAGAAATTGAAATC

ATCTGAACAGTTCTCCCAGCTGTGATTCTCATTCTTATTGCCCTACCATCCCCTCCGAA  
TTTTATACTTGATAGACGAAATTAATGACCCTCACTTGACAATTAAGGCCATCGGCC  
ATCAATGATACTGAAGTTACGAGTACACAGACTACGAAGACCTCGGTTTTGACTCTT  
ACATAATTCTACACAGGACCTTACTCCCGGGCAATTCCGACTTCTAGAGACAGACC  
ACCGAATAGTAATCCCCGTAGAATCTCCAATTCGTGTTCTTATCTCAGCTGAAGATG  
TCCTTCATTCTGAGCAGTCCCCTCACTGGGCGTAAAAGTTGACGCCGTGCCTGGTC  
GCTTAAACCAAGCGACCTTTATCGTCAGCCGACCAGGCGTATACTTCGGACAATGCT  
CTGAAATCTGCGGGGCAAACCATAGTTTCATACCCATCGTTGTAGAAGCAGTCCCCC  
TTAAGCACTTTGAAAACCTGGTCTTCCCTAATAATTGAAGATGCCTATGGCCCATCAA  
GCACACCCATACCACATAGTCGACCCAGCCCATGACCCCTCACAGGGGCTATCGCT  
GCCTTACTGATAACATCTGGCCTTGCTATCTGATTTCACTTCCACTCCACTGTCTTAA  
TAACTATCGGAACAATCCTACTTACTTTAACAATCTTCCAATGGTGACGAGACGTCG  
TACGAGAGGGCACATTTACAGGGACACCACACTCTTCCTGTCCAAAAAGGCCTCCGAT  
ATGGTATAATCCTATTTATTACCTCAGAAGTTCTATTTTTCTAGGCTTTTTCTGAGC  
CTTCTACCACTCAAGCCTGGCACCCACCCCTGAACTAGGAGGCTTTTGACCACCAGC  
AGGCATTACACCCCTAGACCCGTTTGAAGTCCCACTTCTTAACACAGCAGTCCTCCT  
TGCTTCTGGCGTGACTGTTACCTGAGCACATCACAGCATCATAGAGGGTAAACGAA  
AACAAGCTATTCAGGCCCTTGCTCTTACAATCTTACTTGGGGGGTACTTCACTTTTCT  
CCAAGCCCTCGAATATCACGAAGCCCCCTTCACTATTGCAGACGGGGTTTATGGTGC  
TACATTTTTTTGTTGCCACTGGCTTCCACGGACTACACGTCTTAATCGGCTCATCATTC  
TTAGCCGTTTGTTTGTTACGCCAAATTCTCCACCATTTTACATCAAACCACCACTTG  
GATTTGAAGCAGCCGCATGGTACTGACACTTCGTAGACGTCGTCTGACTCTTCCTCT  
ACATCTCTATTTACTGATGAGGATCTTAATGGCCAGTCTACGCAAATCTCACCCCTT  
CTAAAAATCGCAAACGATGCTTTAGTTGACCTCCCTGCCCCCTCTAATATCTCTGTTT  
GATGGAACCTTTGGGTCCCTTCTAGGACTTTGCTTGGTTACTCAAATTGTAACCGGCTT  
ATTTCTAGCCATACATTACACATCAGACATTGCTACTGCTTTTACCTCCGTCGCACAT  
ATCTGCCGAGACGTAACTACGGTTGACTCGTCCGAAGCATCCATGCCAACGGCGCA  
TCATTTTTTTTCATTTGTATTTACCTTCATATCGGCCGAGGCCTATACTATGGCTCCTA  
CCTCTATAAAGAAACATGAAATATCGGAGTTGTCCTCCTCCTCCTCGTAATAATAAC  
AGCTTTTCGTTGGATACGTCCTCCCTTGAGGACAAATATCGTTTTGAGGTGCAACCGT  
TATTACCAATCTTCTGTCCGCGTCCCTTATGTGCGCAACACCCTTGTTCCAATGAATC  
TGAGGTGGCTTTTCCGTAGACAATGCTACCCTCACCCGGTTCTTTGCATTCCACTTCC  
TCTTCCCATTTATTATCGCAGCCGCAACGGTGATTCATCTTCTCTTCTTACGAAAC  
TGGCTCAAATAAACCCACCGGGTTGACTTCAGATTCCGACAAGGTCCCTTTCCACCC  
TACTTCACTTACAAGGACCTCTTGCTTTGCAAGTCCTTCTTGCTGCACTAGCATCCC  
TTGCCCTGTTTTCCCCGAACCTTTTAGGAGACCCAGACAACCTTACCCCCGCAAATC  
CACTTGTTACTCCTCCACATATCAAGCCAGAATGATACTTCCTCTTTGCTTACGCTAT  
CCTCCGCTCCATCCCAAACAACTTGAGGGCGTACTTGCCCTTTTGTTTTCGATCTTA  
GTTCTAATACTCGTCCCTCTTCTACATACCTCTAAACAGCGAAGTCTCATATTCCGCC  
CTCTAACACAATTCTTATTCTGATCATTAGTCGCAGACGTTATAATTCTAACTTGAAT  
TGGGGGAATACCCGTAGAGCACCCCTTCGTCATCATTGGTCAAATAGCATCACTCCT  
TTATTTCTCACTCTTCCTTATCCTAATCCCAGCAGCAGGTTGACTGGAGAACAAGT  
GCTCGGATGAAAATATGATTTCAACTCTCATTACGCATATTATTAATCCATTAACCTT  
TATTGTACCCGTATTGCTAGCCGTAGCATTCCTTACCCTCCTTGAACGAAAAGTACT  
AGGCTACATACAACTCCGAAAAGGACCAAACATCGTAGGGCCTTACGGTCTCCTCC  
AACCCATTGCTGACGGCGTAAAACCTTTTATTAAAGAACCCGTTTCGACCTTCAACCG  
CATCCCCCATCTTGTTCCCTCCTAGCCCCAATGCTCGCACTTACACTAGCCCTTGCCCT  
TTGAGCCCCCTATACCTTTCCCATATCCTGTTGTAGATCTTAACCTCGGTATTTTATTT  
ATTCTGGCACTATCTAGCCTCGCAGTATACTCTATTTTGGGGTCCGGCTGAGCATCC  
AATTCAAAATATGCCTTAGTTGGGGCACTTCGGGGCGTTGCACAAACCATTTTCTAC  
GAAGTCAGCCTGGGACTCATCTTACTTAATATTATTATCTTTACCGGGGGGCTTTACAC  
TCCAGACCTTTAACACAGCACAAGAGGCCATCTGACTAGTACTGCCTGCTTGACCCC

TAGCTGCCATGTGATTCATCTCCACTCTTGCCGAAACAAACCGTGCTCCCTTCGACCT  
GACAGAGGGTGAATCCGAACCTTGTCTCAGGCTTCAACGTAGAGTACGCAGGCGGGC  
CCTTCGCCCTATTCTTTCTGGCCGAGTATTCAAACATCCTCCTAATAAAATACTCTGTC  
CGCGACACTATTTTTGGGCGCCTCTCACATTCCGTCTATCCCCGAATTAACCAGCATC  
AATATTATAACTAAAGCAGCCCTTCTATCAATCGTCTTCCTGTGGGCCCCGAGCTTCCT  
ACCCCCGATTCCGTTATGACCAGCTCATACACCTCATCTGAAAAAACTTCCTCCAC  
TAACTTTAGCTCTGGTTATTTGACATTTAGCGCTTCCCATCGCATTCGCTGGGCTTCC  
CCCACAACCTGTAAATGAACCCCTACATCTTGACCACCCTTCTATTTGGTTTtaggCTTG  
GGTACAACACTCACGTTTGCAAGCTCACACTGGCTCCTCGCTTGGATGGGCCTTGAG  
ATTAATACACTAGCCATCATCCCCCTAATAGCCCACCATCACCACCCACGAGCAGTT  
GAAGCTACTACTAAATATTTCCCTCGCACAAGCCACAGCAGCCGCCACCCTCCTGTTT  
GCGAGTACTACTAACGCTTGACTCACCGGCCAATGGGATGTTCAACAAATGACACA  
CCCCTTCCCACAACCTATAATTGTTATTGCCCTAGCACTAAAAATTGGACTAGCACC  
AATGCACCTCTTGACTCCCGGAAGTTCTTCAAGGACTAGACCTCACCCTGGACTAAT  
CCTCTCAACCTGACAAAACTTGCCCCCTTTACCCTTTTGTACAAATCCAGATAAC  
AATCCTATGCCCTAATCATTATTGGCTTACTTTCTACCCTCATTGGCGGCTGAGGTG  
GCCTCAACCAAACCCAATTACGTAAGATCCTTGCCTATTCTCAATCGCTCACCTTG  
GCTGAATAGTACTGATTCTTCAATTTTCACCCTCCTCAGTCTCCTCACCCTCCTCAC  
GTACTTTCCATGACTTTTTCAACATTCCTAATCTTCAAAGTAAACAAGGCTACCACTA  
TCAATACCCTCGCAATCTCGTGAACAAAACTCCTGTCTCCTCACAGCCCTAGCACCTC  
TCGTCTTATTATCTCTGGGCGGCCTTCCCCCTCTAACCGGCTTCATACCCAAATGATT  
TATTCTCCAAGAATTAATAAGCAAGACCTCCACGCTTGCCACCCTCACTGCATTA  
ACTGCCCTCCTGAGTCTTTACTTCTACTTACGTCTCTCATACGAATAACCCTCACAA  
TGTTCCCTAACAACTCATTGGTATTACTCCCTGACGATTCTACTCCCCCAATCAAC  
CCTCCCCCTCGCCGTATCCACTGCAGCAACCACACTTCTCCTCCCACTAGCACCAGC  
TGCCCTAGCACTACTCATCACCTATGAGCCTCCTTCTAACCATCCTTTCAATTGCTTC  
CCTCCTCTCAACAGTACTTGCCATTGTATCCTTTTGACTACCCCAAATTATTCCAGAC  
CATGAAAAGCTATCACCATATGAATGCGGCTTTGACCCTATGGGGTCCGCCCCGACTA  
CCTTTTTCACTGCGATTTTTTCTCATTGCCATCCTTTTTCTTCTCTTCGACCTAGAGAT  
TGCTCTCCTCCTCCCCCTCCCCTGAGGAGACCAACTAGCTTCACCATTGCTTACATTC  
ACCTGAGCTACAGCTGTCCTAGCCCTCCTAACCTTGGCCTCATTATGAATGAGTTC  
AAGGAGGCTTAGAATGGGCTGAATATGCTAAAAATTCTTATTCCAACACTTATACTT  
ATTCCAACAGCCTGGTTGCTCAAACCCAGCCAACTCTGACCCATTACCTTAATGTAT  
AGCTTTTGCATCTCCTTACTTAGCCTCTCGTGACTAAAAAACCTCTCAGAAACCGGC  
TGATCGTCACTCAACCTATTTATGGCCACCGACCCCTATCAAAACCTCTCCTCGTTC  
TTACATGCTGACTGCTCCCACTAATGATCTTAGCAAGTCAGAAACACACAGCCTCAG  
AGCCCCCTCAACCGCCAGCGCATGTACATCACGCTTCTCTCTTCTCCTCCAGTTCTTCTA  
ATTCTAGCATTTAGCGCCACAGAACTAGTAATGTTCTACGTAATATTTGAAGCTACC  
CTCATCCCCACACTAATCATTATTACCCGCTGGGGAAACCAAACAGAACGCTTAAAT  
GCAGGAACCTATTTTCTTCTACACATTAGCAGGCTCACTTCCTCTCCTCGTTGCTT  
TACTTCTACTTCAAAATTCATCCGGCACCTTATCTTTATTAACCCTCCATTACACAAA  
CCCCCTCGCTCTCATCTTACGCAGACAAATTATGATGAGCAGGCTGTCTTCTAGCAT  
TTCTAGTTAAAATGCCCTCTATGGAGTCCACCTCTGACTTCCTAAGGCCACGTTG  
AAGCCCCAATTGCAGGCTCAATAATCCTTGCAGCGGTCTTCTAAAACTAGGAGGGT  
ACGGCATAATCCGCATAATGACAATGCTAGAACCTCTAACTAAGGAACCTAAGCTAC  
CCATTCATTGTCTTTGCACTTTGAGGGGTATTATGACCGGCTCAATTTGCCTGCGAC  
AAACGGACCTCAAATCCCTAATTGCCTACTCATCTGTAAGCCACATGGGTCTAGTGG  
CCGGGGGCATTCTTATTCAATCACCTGGGGCTTAACGGGGGCCCTTACCCTTATGA  
TCGCACATGGTCTTACCTCATCAGCCCTCTTCTGCCTGGCAAACACAACTATGAAC  
GAACCCATAGCCGGACGATAGTCCTAGCACGGGGCCTTCAAGTAGCTCTACCCCTG  
ATAGCCACTTGATGGTTTATTTCTAGCCTGGCCAACCTGGCTCTTCTCCTCCCCTACCCA  
ATCTCATGGGTGAACTAATAATTATCACTTCCCTGTTCAACTGATCCTGATGAACCCT



GGTATTAACGGGTGGGGGTACTTTAATTACAGCTGGTTATTCCCTCTACATATTCTTA  
ATAACCCAACGAGGCCCTCTCCCAACACATGTTATTGCACTTGAACCCTCTCATACC  
CGAGAACACCTTCTTATTGCCTTCACCTAGTCCCCCTAATTCTACTCGTTCTTAAGCC  
CGAACTGATCTGAGGTTGGACTGCCTATGACCCCCACACACTTTGCCTTCTCCTCAG  
CCTTTTTTCTAGGTTTAAACAGGCCTGGCATTCCACCGGTTCCACCTCCTCTCCGCCCT  
ATTATGCCTTGAAGGAATAATATTATCCCTGTTTATTGCTCTCTCCCTGTGGACACTC  
CAGCTTGACTCAACCAACTTCTCAGCATCTCCTATGCTCCTACTTGCAATTTTCAGCCT  
GTGAAGCAAGCGCCGGCCTCGCCCTTCTGGTAGCCACCGCTCGAACCACGGAACC  
GACCGACTACAAAGCCTAAACCTTCTACAATGCTAAATGTACTCTACCTCCCTCATG  
ATTTCCCTCAAGCCTGATTACGATCTTTGCACTACTGGCTTATCCTCTCATTACTACGA  
TTCAGCCTGCACCTCAAAACCCTCAATGAGCTTCTACCCATGTCAAAACAGCTGTAA  
AAATAGCCTTCTTTGTTAGCCTTTTACCCCTCGCCCTCTTCTCCATGAAGGTGCCGA  
AACAAATCATTTCTGACTGAACCTGAATAAACACTAACTCCTTCAACATTACTATCAG  
CCTAAAATTTGACTTCTACTCAATTATTTTCACACCCATTGCCCTTTACGTTACTTGG  
TCCATTTTAGAATTTCGCATCATGATATATGCATGCAGACCCACAAATGAACCGCTTC  
TTTAAATACCTCCTGACATTTCTGATTGCCATGATTATCCTAGTAACCGCAAACAAC  
ATATTCCAACATTTTATCGGTTGGGAAGGTGTGGGAATTATATCATTTTCTCCTTATCG  
GGTGGTGGTTCGGACGGGCAGATGCTAACACCGCTGCACTCCAAGCAGTGCTCTAT  
AACCGTGTGGGGGATATCGGGCTTATCTTTGCTATGGCTTGAATAGCAGCAAACCTA  
AACTCCTGGGAAATACAACAAGTCTTTGCAGCCTCTAAAAACATAGACTTAAACCTAC  
CCCCTCCTCGGACTAATCATCGCAGCAACTGGCAAATCAGCCCAATTTGGACTGCAC  
CCCTGGCTGCCCTCCGCTATGGAGGGCCCCACACCGGTCTCTGCCCTACTTCACTCT  
AGCACCATAGTCGTTGCCGGCATTTCCTGCTAGTACGAATGAGCCCCCTTATGGAG  
AACAAACCAACAGCCCTCACAACCTTGCTATGCCTCGGAGCCCTCACAACATTTTTT  
ACCGCAACCTGTGCCCTCACACAAAATGACATTAAAAAATCATCGCATTTTCTACA  
TCCAGCCAGCTCGGACTCATAATGGTAACCATTGGGCTAAACCAACCACAACCTAGC  
ATTCCTCCACATTTGCACACACGCCTTCTTCAAAGCCATACTATTTTTATGCTCCGGA  
TCTATTATTCACAGCCTAAATGACGAACAAGACATTCGAAAAATAGGGGGCATAACA  
CCACCTTGCGCCTTATTCATCCTCCTGCCTAACTATTGGCAGCCTTGCCCTCACAGGA  
ACCCCTTCTTGGCTGGTTTCTTCTCTAAAGATGCCATTATCGAAGCATTAACACAT  
CTCACCTGAACGCCTGAGCCCTCACCTTAACTCTCCTAGCCACCTCTTTCACAGCAAT  
TTACAGCTTTCGAGTAATATTCTTTGTGCCTATGGGCTACCCCCGATTTGCTGCCTCT  
CCCCAATCAACGAAAATAACCCAGCAGTAATCAACCCACTCAAGCGCCTAGCATGA  
GGAAGCATCATTTGCAGGCTTACTTATTACCTCTAACATTACACCCCTAAAAACCCCT  
ATTATATCTATACCCCTCTCCTTAACTAGCTGCTCTTGCAGTTACAATTGCTGGCC  
TGCTTGTGGCCATAGAGCTCGCCGCATTAAGTAAACATTACGAACCAATGCCCG  
ACACAATATTCATCACTTCTCCACCTTACTAGGCTTCTTCCCCGGGGTTATGCATCGC  
CTAACCCCCATACTAGCCTTCTTCATAGGCCAAAACGTTGCCAACCAACAGTAGAT  
CAAACCTGATTAGAAAAGACAGGCCCAAAGCCATCGAATCCTCTAACAAACCTCT  
GATTTCTCTACAAGTAACATCCAACGAGGACTGATCAAAACATACCTCCCTCTTC  
CTTCTAACGCTAGCCCTCATAGTCCCAATATTTATTACCTAATGACTTTTGTTATGTA  
TTTAGTTTTATTTTCTCTTGTGTTAGGGTTAGTTGCGGTTGCTTCTAATCCGTCTCCTT  
ATTTTGCTGCTTTAGGTTTAGTTGTGGTAGCTGGTATGGGGTGTGGTGTGCTAGTCGG  
GCATGGGGGGCCTTTTTTATCATTAGTTTTATTCTTAATTTATTTGGGCGGGATGTTG  
GTTGTATTTGCATATTCAGCAGCGTTAGCTGCCGAGCCGTATCCGGAGAGCTGGGGT  
AGTTGATCGGTGCTGGTTTATGGTTATTTACATAGGAGGAGTAATGTCGTTTCAGGG  
TTGTTTTGAGGGGGGTGGTACGAATCGTCTTGGGTTTTAGCAGACGAGTTGGGGGAG  
TTTTCCGTGTTTCGGGGTGATATTGGGGGTGTTGCTTTAATACTCCTCTGGGGGGT  
GGTTGTTAATTATTAGTGCGTGGGTGCTACTTTTAACTTTATTTGTAGTTCTTGAGCT  
GACCGCGGGATAAGTCGAGGAGCGTTGCGGCGGTTA

Verasper\_variegatus\_MK210571

ATGGTATTAAGCTTCTTTGACCAATTTATATCCCCAGTATGCCTTGGCATCCCACTAA

TTGCACTAGCAATTAGCCTGCCCTGAATTTTTTTTCCCAGCCCCAAAAACCGTTGATTA  
AACAACCGCCTGTAAACCCTTCAAGGCTGATTTATGAGCAACTTCACCTCACAACCTC  
CTTTTACCCCTAAACCCCGGTGGTCACAAGTGAGCAATTCTGTTTACCTCACTAATGT  
TTTTTTCTTCTATCAATATACTGGGTCTCCTTCCATACACCTTTACACCAACAACCTCA  
ACTCTCCCTAAACCTAGGCTTCGCAGTGCCCCCTCTGATTAGCAACTGTCATTATGGG  
ATACGCAATCAACCAACACATGCACTAGGACACCTTCTTCCAGAAGGTACGCCCCGCT  
GCCCTCATTCCCGTACTTATTATTATCGAAACAATTAGCCTATTCATTGCCCCCTCG  
CTCTCGGTGTTGCACTTACAGCAAATCTCACGGCAGGCCACTTACTCATTCAACTCA  
TTGCAACAGCTGCCTTTGTCCTTCTTCCCCTAATACCCGTTGTTGCTGTCCTAACAAC  
AGTAGTCCTCTTCCCTCCTGACTCTGCTAGAAATCGCCGTTGCCATGATTCAAGCCTAT  
GTCTTCGTCCTACTCCTAAGCCTTTACCTACAAGAAAACGTTTAATGCCTCAACTGA  
ACCCCGCACCCCTGATTTGCAATTTTAGTTTTCTCTTGAATAATCTTCCTAGTTGTAAT  
CCCCCTAAAATTTTAGCACACATCTACCCTAATGAGCCCACCTCCCAAAGCACACA  
AAAATAAAACAGAATCCTGAAACTGACCATGGTATTAAGTGGCAATCACACGTTGA  
TTTTTCTCGACCAATCACAAAGACATCGGCACCCTCTATCTCGTATTTGGTGCCTGAG  
CCGGAATAGTGGGGACAGGCCTTAGTCTACTTATTCGAGCAGAACTAAGCCAACCC  
GGGGCTCTCTTGGGGGACGACCAGATTTATAACGTAATCGTCACCGCACACGCCTTT  
GTAATAATCTTCTTTATAGTTATACCCATTATGATCGGAGGATTCGGAAACTGACTT  
ATTCCATTAATAATTGGAGCCCCAGACATGGCCTTCCCTCGAATGAATAACATGAGC  
TTCTGACTTCTTCCCCCTCATTTCTTCTACTCCTAGCCTCTTCAGGTGTTGAAGCTGG  
GGCAGGAACAGGGTGAACCGTTTATCCTCCACTAGCTGGCAATTTAGCCCACGCCG  
GGGCCTCCGTAGACCTAACAATCTTTTCACTTCACCTTGCAGGAATTTTCATCAATTCT  
GGGAGCAATTAACCTTTATTACTACTATCATCAACATAAAACCTACGACAGTAACTAT  
GTACCAAATCCCGTTATTTGTCTGAGCCGTAATAATTACAGCCGTCCTACTTCTTCTT  
TCCCTTCCCGTCTTAGCCGCAGGAATTACAATGCTACTGACGGACCGAAACCTTAAC  
ACGACCTTCTTTGACCCTGCCGGAGGGGGTGACCCTATCCTCTATCAACATTTATTCT  
GATTCTTTGGTACCCGGAAGTATATATCCTCATTCTTCCAGGTTCGGAATAATTTT  
TCACATCGTAGCATACTATTCAGGTAAGAAAGAACCTTTTGGTTATATGGGGATGGT  
GTGAGCTATAATGGCCATCGGACTCCTCGGATTTATCGTATGGGCCCATCACATGTT  
CACAGTCGGTATAGATGTAGACACACGAGCCTATTTTACCTCTGCCACAATAATTAT  
TGCGATTCCAACCGGCGTAAAAGTCTTTAGTTGGCTCGCAACCCCTTCATGGGGGAAG  
CATTAAATGAGAGACACCACTTCTTTGGGCGCTGGGCTTTATTTTCCTGTTTACAGTA  
GGAGGACTAACCGGCATTGTCTTAGCTAATTCTTCTCTTGATATTGTCCTACATGATA  
CATACTATGTAGTAGCTCACTTCCACTATGTTCTATCCATAGGAGCTGTATTTGCAAT  
CGTTGCTGCCTTCGTCCACTGATTCCCCTATTTTTCGGGCTATACCCTTCACTCTACA  
TGAACAAAAATTCACTTCGGCCTGATGTTTATTGGGGTCAATCTAACATTCTTCCCC  
AACACTTCCTAGGTCTGGCCGGAATACCTCGACGGTACTCAGACTACCCAGACGCTT  
ACACCCTTTGAAATACTGTCTCATCAATTGGATCCCTAATGTCGCTTATCGCTGTAAT  
TTTATTTTTATTATTATTGAGAAGCATTTACAGCCAAACGAGAAGTTAGCGCAGT  
AGAACTAACTTCAACTAATATTGAATGACTCTACGGCTGCCCCCACCTTATCACAC  
ATTTGAAGAACCCGCATTTGTTCAAGTTCGAATTAATAATGGCTCATCCCTCACA  
ACTCGGATTTCAAGACGCAGCTTCACCCTTAATAGAAGAACTACTTCACTTCCACGA  
CCACGCCTTAATAGTTGTTATTCTTATTAGCACGATAGTACTATATATTATTGCCGCT  
ATAGTCACAGCGGAACCTACAGATAAACTTGTTCTAGACTCCCAAGAAATTGAAATC  
ATCTGAACAGTTCTCCCAGCTGTGATTCTCATTCTTATTGCCCTACCATCCCTCCGAA  
TTTTATACTTGATAGACGAAATTAATGACCCTCACTTGACAATTAAGCCATCGGCC  
ATCAATGATACTGAAGTTACGAGTACACAGACTACGAAGACCTCGGTTTTGACTCTT  
ACATAATTCTACACAGGACCTTACTCCCGGGCAATTCCGACTTCTAGAGACAGACC  
ACCGAATAGTAATCCCCGTAGAATCTCCAATTCGTGTTCTTATCTCAGCTGAAGATG  
TCCTTCATTCTGAGCAGTCCCCTCACTGGGCGTAAAAGTTGACGCCGTGCCTGGTC  
GCTTAAACCAAGCGACCTTTATCGTCAGCCGACCAGGCGTATACTTCGGACAATGCT  
CTGAAATCTGCGGGGCAAACCATAGTTTCATACCCATCGTTGTAGAAGCAGTCCCCC

TTAAGCACTTTGAAAACCTGGTCTTCCCTAATAATTGAAGATGCCTATGGCCCATCAA  
GCACACCCATACCACATAGTCGACCCAGCCCATGACCCCTCACAGGGGCTATCGCT  
GCCTTACTGATAACATCTGGCCTTGCTATCTGATTTCACTTCCACTCCACTGTCTTAA  
TAACTATCGGAACAATCCTACTTACTTTAACAATCTTCCAATGGTGACGAGACGTCG  
TACGAGAGGGCACATTTAGGGACACCACACTCTTCCTGTCCAAAAAGGCCTCCGAT  
ATGGTATAATCCTATTTATTACCTCAGAAGTTCTATTTTTCTAGGCTTTTTCTGAGC  
CTTCTACCCTCAAGCCTGGCACCCACCCCTGAACTAGGAGGCTTTTGACCACCAGC  
AGGCATTACACCCCTAGACCCGTTTGAAGTCCCACTTCTTAACACAGCAGTCCTCCT  
TGCTTCTGGCGTGACTGTTACCTGAGCACATCACAGCATCATAGAGGGTAAACGAA  
AACAAGCTATTCAGGCCCTTGCTCTTACAATCTTACTTGGGGGGTACTTCACTTTTTCT  
CCAAGCCCTCGAATATCACGAAGCCCCCTTCACTATTGCAGACGGGGTTTATGGTGC  
TACATTTTTTTGTTGCCACTGGCTTCCACGGACTACACGTCTTAATCGGCTCATCATTC  
TTAGCCGTTTGTGTTACGCCAAATTCTCCACCATTTTACATCAAACCACCACTTTG  
GATTTGAAGCAGCCGCATGGTACTGACACTTCGTAGACGTCGTCTGACTCTTCCTCT  
ACATCTCTATTTACTGATGAGGATCTTAATGGCCAGTCTACGCAAATCTCACCCCTT  
CTAAAAATCGCAAACGATGCTTTAGTTGACCTCCCTGCCCCCTCTAATATCTCTGTTT  
GATGGAACCTTTGGGTCCCTTCTAGGACTTTGCTTGGTTACTCAAATTGTAACCGGCTT  
ATTTCTAGCCATACATTACACATCAGACATTGCTACTGCTTTTACCTCCGTGCGACAT  
ATCTGCCGAGACGTAACTACGGTTGACTCGTCCGAAGCATCCATGCCAACGGCGCA  
TCATTTTTTTTCATTTGTATTTACCTTCATATCGGCCGAGGCCTATACTATGGCTCCTA  
CCTCTATAAAGAAACATGAAATATCGGAGTTGTCTCCTCCTCCTCGTAATAATAAC  
AGCTTTTCGTTGGATACGTCCTCCCTTGAGGACAAATATCGTTTTGAGGTGCAACCGT  
TATTACCAATCTTCTGTCCGCGTCCCTTATGTGGCAACACCCTTGTTCCAATGAATC  
TGAGGTGGCTTTTCCGTAGACAATGCTACCCTCACCCGGTTCTTTGCATTCCACTTCC  
TCTTCCCATTTATTATCGCAGCCGCAACGGTGATTCATCTTCTCTTCCTTCACGAAAC  
TGGCTCAAATAAACCCACCGGGTTGACTTCAGATTCCGACAAGGTCCCTTTCCACCC  
TACTTCACTTACAAGGACCTCTTGGCTTTGCAGTCCTTCTTGCTGCACTAGCATCCC  
TTGCCCTGTTTTCCCCGAACCTTTTAGGAGACCCAGACAACCTTTACCCCCGCAAATC  
CACTTGTTACTCCTCCACATATCAAGCCAGAATGATACTTCCTCTTTGCTTACGCTAT  
CCTCCGCTCCATCCCAAACAACTTGGAGGCGTACTTGCCCTTTTGTTCGATCTTA  
GTTCTAATACTCGTCCCTCTTCTACATACCTCTAAACAGCGAAGTCTCATATTCCGCC  
CTCTAACACAATTCTTATTCTGATCATTAGTCGCAGACGTTATAATTCTAACTTGAAT  
TGGGGGAATACCCGTAGAGCACCCCTTCGTCATCATTGGTCAAATAGCATCACTCCT  
TTATTTCTCACTCTTCCTTATCCTAATCCCAGCAGCAGGTTGACTGGAGAACAAAGT  
GCTCGGATGAAAATATGATTTCAACTCTCATTACGCATATTATTAATCCATTAACCTT  
TATTGTACCCGTATTGCTAGCCGTAGCATTCCTTACCCTCCTTGAACGAAAAGTACT  
AGGCTACATACAACTCCGAAAAGGACCAAACATCGTAGGGCCTTACGGTCTCCTCC  
AACCCATTGCTGACGGCGTAAACTCTTTATTAAAGAACCCGTTTCGACCTTCAACCG  
CATCCCCATCTTGTTCTCCTAGCCCCAATGCTCGCACTTACACTAGCCCTTACCCT  
TTGAGCCCCATACCTTTCCCATATCCTGTTGTAGATCTTAACCTCGGTATTTTATTT  
ATTCTGGCACTATCTAGCCTCGCAGTATACTCTATTTTGGGGTCCGGCTGAGCATCC  
AATTCAAATATGCCTTAGTTGGGGCACTTCGGGGCCGTTGCACAAACCATTTTCCTAC  
GAAGTCAGCCTGGGACTCATCTTACTTAATATTATTATCTTTACCGGGGGCTTTACAC  
TCCAGACCTTTAACACAGCACAAGAGGCCATCTGACTAGTACTGCCTGCTTGACCCC  
TAGCTGCCATGTGATTCATCTCCACTCTTGCCGAAACAAACCGTGCTCCCTTCGACCT  
GACAGAGGGTGAATCCGAACCTTGCTCAGGCTTCAACGTAGAGTACGCAGGGCGGC  
CCTTCGCCCTATTCTTTCTGGCCGAGTATTCAAACATCCTCCTAATAAATACTCTGTC  
CGCGACACTATTTTTGGGCGCCTCTCACATTCCGTCTATCCCCGAATTAACCAGCATC  
AATATTATAACTAAAGCAGCCCTTCTATCAATCGTCTTCCTGTGGGCCCCGAGCTTCCT  
ACCCCCGATTCCGTTATGACCAGCTCATACACCTCATCTGAAAAAACTTCCTCCAC  
TAACTTTAGCTCTGGTTATTTGACATTTAGCGCTTCCCATCGCATTCGCTGGGCTTCC  
CCCACAACCTGTAAATGAACCCCTACATCTTGACCACCCTTCTATTTGGTTTAGGCTTG

GGTACAACACTCACGTTTGCAAGCTCACACTGGCTCCTCGCTTGGATGGGCCTTGAG  
ATTAATACACTAGCCATCATCCCCCTAATAGCCCACCATCACCACCCACGAGCAGTT  
GAAGCTACTACTAAATATTTCTCGCACAAGCCACAGCAGCCGCCACCCTCCTGTTT  
GCGAGTACTACTAACGCTTGACTCACCGGCCAATGGGATGTTCAACAAATGACACA  
CCCCTTCCCACAACCTATAATTGTTATTGCCCTAGCACTAAAAATTGGACTAGCACC  
AATGCACTCTTGACTCCCGGAAGTTCTTCAAGGACTAGACCTCACCCTGGACTAAT  
CCTCTCAACCTGACAAAACTTGCCCCCTTTACCCTTTTGTGTTACAAATCCAGATAAC  
AATCCTATGCCCCCTAATCATTATTGGCTTACTTTCTACCCTCATTGGCGGGCTGAGGTG  
GCCTCAACCAAACCCAATTACGTAAGATCCTTGCCTATTCTCAATCGCTCACCTTG  
GCTGAATAGTACTGATTCTTCAATTTTCACCACTCCTCAGTCTCCTCACTCTCCTCAC  
GTACTTTCCATGACTTTTTCAACATTCTTAATCTTCAAAGTAAACAAGGCTACCACTA  
TCAATACCCTCGCAATCTCGTGAACAAAACTCCTGTCTCCTACAGCCCTAGCACCTC  
TCGTCTTATTATCTCTGGGCGGCCTTCCCCCTCTAACCGGCTTCATACCCAAATGATT  
TATTCTCCAAGAATTAACCTAAGCAAGACCTCCCACGCTTGCCACCCTCACTGCATTA  
ACTGCCCTCCTGAGTCTTTACTTCTACTTACGTCTCTCATAACGCAATAACCCTCACAA  
TGTTCCCTAACAACCTCATTGGTATTACTCCCTGACGATTCTACTCCCCCAATCAAC  
CCTCCCCCTCGCCGTATCCACTGCAGCAACCACACTTCTCCTCCCCTAGCACCAGC  
TGCCCTAGCACTACTCATCACCTATGAGCCTCCTTCTAACCATCCTTTCAATTGCTTC  
CCTCCTCTCAACAGTACTTGCCATTGTATCCTTTTGACTACCCCAAATTATTCCAGAC  
CATGAAAAGCTATCACCATATGAATGCGGCTTTGACCCTATGGGGTCCGCCCCGACTA  
CCTTTTTCACTGCGATTTTTTCTCATTGCCATCCTTTTTCTTCTCTTCGACCTAGAGAT  
TGCTCTCCTCCTCCCCCTCCCCTGAGGAGACCAACTAGCTTCACCATTGCTTACATTC  
ACCTGAGCTACAGCTGTCCTAGCCCTCCTAACCTTGGCCTCATTATGAATGAGTTC  
AAGGAGGCTTAGAATGGGCTGAATATGCTAAAAATTCTTATTCCAACACTTATACTT  
ATTCCAACAGCCTGGTTGCTCAAACCCAGCCAACCTCTGACCCATTACCTTAATGTAT  
AGCTTTTGCATCTCCTTACTTAGCCTCTCGTGACTAAAAAACCTCTCAGAAACCGGC  
TGATCGTCACTCAACCTATTTATGGCCACCGACCCCTATCAAAACCTCTCCTCGTTC  
TTACATGCTGACTGCTCCCACTAATGATCTTAGCAAGTCAGAAACACACAGCCTCAG  
AGCCCTCAACCGCCAGCGCATGTACATCACGCTTCTCTCTTCTCCTCCAGTTCTTCCTA  
ATTCTAGCATTTAGCGCCACAGAACTAGTAATGTTCTACGTAATATTTGAAGCTACC  
CTCATCCCCACACTAATCATTATTACCCGCTGGGGAAACCAAACAGAACGCTTAAAT  
GCAGGAACCTATTTTCTCTTCTACACATTAGCAGGCTCACTTCCTCTCCTCGTTGCTT  
TACTTCTACTTCAAAATTCATCCGGCACCTTATCTTTATTAACCCTCCATTACACAAA  
CCCCCTCGCTCTCATCTTACGCAGACAAATTATGATGAGCAGGCTGTCTTCTAGCAT  
TTCTAGTTAAAATGCCCCCTCTATGGAGTCCACCTCTGACTTCCTAAGGCCACGTTG  
AAGCCCCAATTGCAGGCTCAATAATCCTTGCAGCGGTCTTCTAAAACCTAGGAGGGT  
ACGGCATAATCCGCATAATGACAATGCTAGAACCTCTAATAAGGAACCTAAGCTAC  
CCATTCAATTGTCTTTGCACTTTGAGGGGTTATTATGACCGGCTCAATTTGCCTGCGAC  
AAACGGACCTCAAATCCCTAATTGCCTACTCATCTGTAAGCCACATGGGTCTAGTGG  
CCGGGGGCATTCTTATTCAATCACCTGGGGCTTAACGGGGGCCCTTACCCTTATGA  
TCGCACATGGTCTTACCTCATCAGCCCTCTTCTGCCTGGCAAACACAACTATGAAC  
GAACCCATAGCCGGACGATAGTCCTAGCACGGGGCCTTCAAGTAGCTCTACCCCTG  
ATAGCCACTTGATGGTTTATTTCTAGCCTGGCCAACCTGGCTCTTCTCCTCCCCTACCCA  
ATCTCATGGGTGAACTAATAATTATCACTTCCCTGTTCAACTGATCCTGATGAACCCT  
GGTATTAACGGGTGGGGGTACTTTAATTACAGCTGGTTATTCCCTCTACATATTCTTA  
ATAACCCAACGAGGCCCTCTCCCAACACATGTTATTGCACTTGAACCCTCTCATACC  
CGAGAACACCTTCTTATTGCCTTACCTAGTCCCCCTAATTCTACTCGTTCTTAAGCC  
CGAACTGATCTGAGGTTGGACTGCCTATGACCCCCACACACTTTGCCTTCTCCTCAG  
CCTTTTTTCTAGGTTTAAACAGGCCTGGCATTCCACCGGTTCCACCTCCTCTCCGCCCT  
ATTATGCCTTGAAGGAATAATATTATCCCTGTTTATTGCTCTCTCCCTGTGGACACTC  
CAGCTTGACTCAACCAACTTCTCAGCATCTCCTATGCTCCTACTTGCATTTTTCAGCCT  
GTGAAGCAAGCGCCGGCCTCGCCCTTCTGGTAGCCACCGCTCGAACCACGGAACC

GACCGACTACAAAGCCTAAACCTTCTACAATGCTAAATGTACTCTACCTCCCTCATG  
ATTTCTCAAGCCTGATTACGATCTTTGCACTACTGGCTTATCCTCTCATTACTACGA  
TTCAGCCTGCACCTCAAAACCCTCAATGAGCTTCTACCCATGTCAAAACAGCTGTAA  
AAATAGCCTTCTTTGTTAGCCTTTTACCCCTCGCCCTCTTTCTCCATGAAGGTGCCGA  
AACAAATCATTTCTGACTGAACCTGAATAAACACTAACTCCTTCAACATTACTATCAG  
CCTAAAATTTGACTTCTACTCAATTATTTTCACACCCATTGCCCTTTACGTTACTTGG  
TCCATTTTAGAATTCGCATCATGATATATGCATGCAGACCCACAAATGAACCGCTTC  
TTAAATACCTCCTGACATTTCTGATTGCCATGATTATCCTAGTAACCGCAAACAAC  
ATATTCCAACATTTTATCGGTTGGGAAGGTGTGGGAATTATATCATTTTCTCCTTATCG  
GGTGGTGGTTCGGACGGGCAGATGCTAACACCGCTGCACTCCAAGCAGTGCTCTAT  
AACCGTGTGGGGGATATCGGGCTTATCTTTGCTATGGCTTGAATAGCAGCAAACCTA  
AACTCCTGGGAAATACAACAAGTCTTTGCAGCCTCTAAAAACATAGACTTAACCTAC  
CCCCTCCTCGGACTAATCATCGCAGCAACTGGCAAATCAGCCCAATTTGGACTGCAC  
CCCTGGCTGCCCTCCGCTATGGAGGGCCCCACACCGGTCTCTGCCCTACTTCACTCT  
AGCACCATAGTCGTTGCCGGCATTTCCTGCTAGTACGAATGAGCCCCCTTATGGAG  
AACAAACCAACAGCCCTCACAACTTGCCTATGCCTCGGAGCCCTCACAAATTTTTT  
ACCGCAACCTGTGCCCTCACACAAAATGACATTAAAAAAATCATCGCATTCTTCTACA  
TCCAGCCAGCTCGGACTCATAATGGTAACCATTGGGCTAAACCAACCACAACCTAGC  
ATTCCTCCACATTTGCACACACGCCTTCTTCAAAGCCATACTATTTTTATGCTCCGGA  
TCTATTATTCACAGCCTAAATGACGAACAAGACATTCGAAAAATAGGGGGCATACA  
CCACCTTGCGCCTTATTCATCCTCCTGCCTAACTATTGGCAGCCTTGCCCTCACAGGA  
ACCCCTTCTTGCTGGTTTCTTCTCTAAAGATGCCATTATCGAAGCATTAAACACAT  
CTCACCTGAACGCCTGAGCCCTCACCTTAACTCTCCTAGCCACCTCTTTCACAGCAAT  
TTACAGCTTTCGAGTAATATTCTTTGTGCCTATGGGCTACCCCCGATTTGCTGCCTCT  
CCCCAATCAACGAAAATAACCCAGCAGTAATCAACCCACTCAAGCGCCTAGCATGA  
GGAAGCATCATTGCAGGCTTACTTATTACCTCTAACATTACACCCCTAAAAACCCCT  
ATTATATCTATACCCCTCTCCTTAAACTAGCTGCTCTTGCAGTTACAATTGCTGGCC  
TGCTTGTGGCCATAGAGCTCGCCGCATTAACTAGTAAACATTACGAACCAATGCCCG  
ACACAATATTCATCACTTCTCCACCTTACTAGGCTTCTTCCCCGGGGTTATGCATCGC  
CTAACCCCCATACTAGCCTTCTTCATAGGCCAAAACGTTGCCAACCAAACAGTAGAT  
CAAACCTGATTAGAAAAGACAGGCCCCCAAAGCCATCGAATCCTCTAACAAACCTCT  
GATTTCTCTACAAGTAACATCCAACGAGGACTGATCAAAACATACCTCCCCTCTTC  
CTTCTAACGCTAGCCCTCATAGTCCCAATATTTATTACCTAATGACTTTTGTTATGTA  
TTAGTTTTATTTTCTCTTGTGTTAGGGTTAGTTGCGGTTGCTTCTAATCCGTCTCCTT  
ATTTTGCTGCTTTAGGTTTGTGTTAGGTTAGTGGTATGGGGTGTGGTGTGCTAGTCGG  
GCATGGGGGGCCTTTTTTATCATTAGTTTTATTCTTAATTTATTTGGGCGGGATGTTG  
GTTGTATTTGCATATTCAGCAGCGTTAGCTGCCGAGCCGTATCCGGAGAGCTGGGGT  
AGTTGATCGGTGCTGGTTTATGGTTATTTACATAGGAGGAGTAATGTCGTTTCAGGG  
TTGTTTTGAGGGGGGTGGTACGAATCGTCTTGGGTTTTAGCAGACGAGTTGGGGGAG  
TTTTCCGTGTTTCGGGGTGATATTGGGGGTGTTGCTTTAATACTCCTCTGGGGGGT  
GGTTGTTAATTATTAGTGCGTGGGTGCTACTTTTAACTTTATTTGTAGTTCTTGAGCT  
GACCGCGGGATAAGTCGAGGAGCGTTGCGGCGGTTA

[  
BEGIN SETS;

TAXSET LENGTH\_ATLEAST\_400 = 1 2 3 4 5 6 7 8 9 10 11 12 13 14 15 16 17 18 19  
20 21 22 23 24 25 26;

TAXSET LENGTH\_ATLEAST\_600 = 1 2 3 4 5 6 7 8 9 10 11 12 13 14 15 16 17 18 19  
20 21 22 23 24 25 26;

TAXSET LENGTH\_ATLEAST\_800 = 1 2 3 4 5 6 7 8 9 10 11 12 13 14 15 16 17 18 19  
20 21 22 23 24 25 26;

TAXSET LENGTH\_ATLEAST\_1000 = 1 2 3 4 5 6 7 8 9 10 11 12 13 14 15 16 17 18 19  
20 21 22 23 24 25 26;  
TAXSET LENGTH\_ATLEAST\_1200 = 1 2 3 4 5 6 7 8 9 10 11 12 13 14 15 16 17 18 19  
20 21 22 23 24 25 26;  
TAXSET LENGTH\_ATLEAST\_1400 = 1 2 3 4 5 6 7 8 9 10 11 12 13 14 15 16 17 18 19  
20 21 22 23 24 25 26;  
TAXSET LENGTH\_ATLEAST\_1600 = 1 2 3 4 5 6 7 8 9 10 11 12 13 14 15 16 17 18 19  
20 21 22 23 24 25 26;  
TAXSET LENGTH\_ATLEAST\_2000 = 1 2 3 4 5 6 7 8 9 10 11 12 13 14 15 16 17 18 19  
20 21 22 23 24 25 26;  
TAXSET LENGTH\_ATLEAST\_3000 = 1 2 3 4 5 6 7 8 9 10 11 12 13 14 15 16 17 18 19  
20 21 22 23 24 25 26;  
TAXSET LENGTH\_ATLEAST\_4000 = 1 2 3 4 5 6 7 8 9 10 11 12 13 14 15 16 17 18 19  
20 21 22 23 24 25 26;  
TAXSET CHARSETS\_ATLEAST\_8 = 1 2 3 4 5 6 7 8 9 10 11 12 13 14 15 16 17 18 19  
20 21 22 23 24 25 26;  
TAXSET CHARSETS\_ATLEAST\_7 = 1 2 3 4 5 6 7 8 9 10 11 12 13 14 15 16 17 18 19  
20 21 22 23 24 25 26;  
TAXSET CHARSETS\_ATLEAST\_6 = 1 2 3 4 5 6 7 8 9 10 11 12 13 14 15 16 17 18 19  
20 21 22 23 24 25 26;  
TAXSET CHARSETS\_ATLEAST\_5 = 1 2 3 4 5 6 7 8 9 10 11 12 13 14 15 16 17 18 19  
20 21 22 23 24 25 26;  
TAXSET CHARSETS\_ATLEAST\_4 = 1 2 3 4 5 6 7 8 9 10 11 12 13 14 15 16 17 18 19  
20 21 22 23 24 25 26;  
TAXSET CHARSETS\_ATLEAST\_3 = 1 2 3 4 5 6 7 8 9 10 11 12 13 14 15 16 17 18 19  
20 21 22 23 24 25 26;  
TAXSET CHARSETS\_ATLEAST\_2 = 1 2 3 4 5 6 7 8 9 10 11 12 13 14 15 16 17 18 19  
20 21 22 23 24 25 26;  
TAXSET TAXA\_HAVING\_ATPase6 = 1 2 3 4 5 6 7 8 9 10 11 12 13 14 15 16 17 18 19  
20 21 22 23 24 25 26;  
TAXSET TAXA\_HAVING\_ATPase8 = 1 2 3 4 5 6 7 8 9 10 11 12 13 14 15 16 17 18 19  
20 21 22 23 24 25 26;  
TAXSET TAXA\_HAVING\_COI = 1 2 3 4 5 6 7 8 9 10 11 12 13 14 15 16 17 18 19 20  
21 22 23 24 25 26;  
TAXSET TAXA\_HAVING\_COII = 1 2 3 4 5 6 7 8 9 10 11 12 13 14 15 16 17 18 19 20  
21 22 23 24 25 26;  
TAXSET TAXA\_HAVING\_COIII = 1 2 3 4 5 6 7 8 9 10 11 12 13 14 15 16 17 18 19 20  
21 22 23 24 25 26;  
TAXSET TAXA\_HAVING\_Cytb = 1 2 3 4 5 6 7 8 9 10 11 12 13 14 15 16 17 18 19 20  
21 22 23 24 25 26;  
TAXSET TAXA\_HAVING\_ND1 = 1 2 3 4 5 6 7 8 9 10 11 12 13 14 15 16 17 18 19 20  
21 22 23 24 25 26;  
TAXSET TAXA\_HAVING\_ND2 = 1 2 3 4 5 6 7 8 9 10 11 12 13 14 15 16 17 18 19 20  
21 22 23 24 25 26;  
TAXSET TAXA\_HAVING\_ND3 = 1 2 3 4 5 6 7 8 9 10 11 12 13 14 15 16 17 18 19 20  
21 22 23 24 25 26;  
TAXSET TAXA\_HAVING\_ND4 = 1 2 3 4 5 6 7 8 9 10 11 12 13 14 15 16 17 18 19 20  
21 22 23 24 25 26;  
TAXSET TAXA\_HAVING\_ND4L = 1 2 3 4 5 6 7 8 9 10 11 12 13 14 15 16 17 18 19 20  
21 22 23 24 25 26;  
TAXSET TAXA\_HAVING\_ND5 = 1 2 3 4 5 6 7 8 9 10 11 12 13 14 15 16 17 18 19 20  
21 22 23 24 25 26;

TAXSET TAXA\_HAVING\_ND6 = 1 2 3 4 5 6 7 8 9 10 11 12 13 14 15 16 17 18 19 20  
21 22 23 24 25 26;

CHARSET ATPase6 = 1-678;  
CHARSET ATPase8 = 679-844;  
CHARSET COI = 845-2395;  
CHARSET COII = 2396-3086;  
CHARSET COIII = 3087-3871;  
CHARSET Cytb = 3872-5011;  
CHARSET ND1 = 5012-5986;  
CHARSET ND2 = 5987-7028;  
CHARSET ND3 = 7029-7377;  
CHARSET ND4 = 7378-8754;  
CHARSET ND4L = 8755-9051;  
CHARSET ND5 = 9052-10886;  
CHARSET ND6 = 10887-11401;

END;

]

begin assumptions;

CHARSET ATPase6 = 1-678;  
CHARSET ATPase8 = 679-844;  
CHARSET COI = 845-2395;  
CHARSET COII = 2396-3086;  
CHARSET COIII = 3087-3871;  
CHARSET Cytb = 3872-5011;  
CHARSET ND1 = 5012-5986;  
CHARSET ND2 = 5987-7028;  
CHARSET ND3 = 7029-7377;  
CHARSET ND4 = 7378-8754;  
CHARSET ND4L = 8755-9051;  
CHARSET ND5 = 9052-10886;  
CHARSET ND6 = 10887-11401;

CHARSET atp6\_pos1 = 1-678\3 ;  
CHARSET atp6\_pos2 = 2-678\3 ;  
CHARSET atp6\_pos3 = 3-678\3 ;  
CHARSET atp8\_pos1 = 679-844\3 ;  
CHARSET atp8\_pos2 = 680-844\3 ;  
CHARSET atp8\_pos3 = 681-844\3 ;  
CHARSET coi\_pos1 = 845-2395\3 ;  
CHARSET coi\_pos2 = 846-2395\3 ;  
CHARSET coi\_pos3 = 847-2395\3 ;  
CHARSET coii\_pos1 = 2396-3086\3 ;  
CHARSET coii\_pos2 = 2397-3086\3 ;  
CHARSET coii\_pos3 = 2398-3086\3 ;  
CHARSET coiii\_pos1 = 3087-3871\3 ;  
CHARSET coiii\_pos2 = 3088-3871\3 ;  
CHARSET coiii\_pos3 = 3089-3871\3 ;  
CHARSET cytb\_pos1 = 3872-5011\3 ;  
CHARSET cytb\_pos2 = 3873-5011\3 ;  
CHARSET cytb\_pos3 = 3874-5011\3 ;  
CHARSET nd1\_pos1 = 5012-5986\3 ;

```
CHARSET nd1_pos2 = 5013-5986\3 ;  
CHARSET nd1_pos3 = 5014-5986\3 ;  
CHARSET nd2_pos1 = 5987-7028\3 ;  
CHARSET nd2_pos2 = 5988-7028\3 ;  
CHARSET nd2_pos3 = 5989-7028\3 ;  
CHARSET nd3_pos1 = 7029-7377\3 ;  
CHARSET nd3_pos2 = 7030-7377\3 ;  
CHARSET nd3_pos3 = 7031-7377\3 ;  
CHARSET nd4_pos1 = 7378-8754\3 ;  
CHARSET nd4_pos2 = 7379-8754\3 ;  
CHARSET nd4_pos3 = 7380-8754\3 ;  
CHARSET nd4L_pos1 = 8755-9051\3 ;  
CHARSET nd4L_pos2 = 8756-9051\3 ;  
CHARSET nd4L_pos3 = 8757-9051\3 ;  
CHARSET nd5_pos1 = 9052-10886\3 ;  
CHARSET nd5_pos2 = 9053-10886\3 ;  
CHARSET nd5_pos3 = 9054-10886\3 ;  
CHARSET nd6_pos1 = 10887-11301\3 ;  
CHARSET nd6_pos2 = 10888-11401\3 ;  
CHARSET nd6_pos3 = 10889-11401\3 ;
```

end;
