# Supplementary material
Source: MDPI journal article supplement (https://www.mdpi.com/1424-2818/14/10/805)
Supplement: s1 [file s1]

Table 2S, Supplement

File: Fl26seq-pt8-123ps4-tip-r24b1-n=5E7-fix-pop-hm.xml

```
<?xml version="1.0" encoding="UTF-8" standalone="no"?><beast beautitemplate='Standard'
beautistatus="
namespace="beast.core:beast.evolution.alignment:beast.evolution.tree.coalescent:beast.core.util:
beast.evolution.nuc:beast.evolution.operators:beast.evolution.sitemodel:beast.evolution.substituti
onmodel:beast.evolution.likelihood" required="" version="2.6">
```

```
<data
```

```
id="Fl26seq-pt7-11401-123ps4"
```

```
spec="Alignment">
```

```

    <sequence id="seq_Cleisthenes_herzensteini_KT223828" spec="Sequence"
    taxon="Cleisthenes_herzensteini_KT223828" totalcount="4"
    value="ATGATACTAAGCTTCTTTGACCAATTTATGTCCCCCGTATTCCTTGGTATCCC
    CCTAATTGCGCTAGCAATTACGCTGCCCTGAACCCTATTCCCAGCCCCCTGTCTTCGCT
    GATTAAACAACCGTATAGTTTCACTTCAAGGGTGATTTATTAGCGGTTTTACATCTC
    AACTTCTTCTCCCACTAAACCCCGCCGGACACAAATGAGCTATCTTATTTGCCTCACT
    AATCTTTCCTCTCTCTATCAATATGCTCGGACTCCTACCGTACACATTTACACCCACC
    ACTCAACTCTCACTTAACCTTGGCCTCGCAGTCCCACTCTGATTGGCAACTGTAATTA
    TGGTATGCGGAATCAACCGACAGTCGCTCTAGGCCACCTCCTTCCAGAAGGGACCCC
    CACCCCTCTCATCCCCGTCCTAATCATTATCGAAACAATTAGCCTATTTATTCGACCT
    CTCGCCCTTGGTGTTGACTTACAGCAAATCTTACAGCTGGCCACCTGCTCATTCAA
    CTCATTGCAACAGCTGCCTTCGTCCTTCTTCCGCTCATGCCTGTGGTTGCTATTCTAA
    CAGCAACAGTTCTCTTTCTCCTCACTCTCCTAGAAAGTTGCCGTTGCTATAATTGAGGC
    CTATGTCTTCGTTTTACTCCTGAGTCTTTACCTACAAGAAAACGTCTAATGCCCAAC
    TGAATCCCGCACCCCTGATTTGCAATTTTGGTTTTCTCTTGAATAATCCTTTTAACTGT
    TATTCGCCCAAAAGTTTTAGCTCATACTTACCCCAACGAGCCAACCTCTCAAAGCAC
    ACAAAAACAAAACAGAACCCTGAAACTGACCATGATACTAAGTGGAATCACACGT
    TGATTTTTCTCGACCAATCACAAAGACATCGGCACCCTCTATCTCGTATTTGGTGCCT
    GAGCCGGAATAGTGGGGACAGGCCTAAGTCTACTCATTCGAGCAGAACTCAGCCAA
    CCTGGGGCTCTCCTGGGAGACGATCAGATCTATAACGTGATCGTTACCGCACACGCC
    TTTGTAATAATCTTCTTTATAGTAATACCAATTATGATTGGAGGATTTGGGAACTGA
    CTTATCCCTCTAATGATCGGGGCCCTGACATGGCTTTCCCCCGGATAAACAACATG
    AGTTTCTGACTTTTACCCCCATCTTTTCTCCTTCTCTTAGCCTCTTCAGGCGTAGAAG
    CCGGGGCTGGGACTGGGTGAACCGTATATCCTCCGCTGGCTGGAAATTTAGCACAC
    GCCGGAGCGTCCGTAGACCTCACAATCTTCTCCCTTCACCTTGCCGGGATTTTCATCA
    ATCCTGGGGGCAATCAACTTTATTACCACCATTATCAATATGAAACCTACAGCGGTT
    ACTATATACCAAATTCCACTATTTCGTGTGGGCAGTACTAATCACAGCCGTTCTTCTTC
    TCCTTTCCCTTCCAGTCTTAGCCGCTGGCATCACAAATGCTGCTCACAGACCGTAACCT
    AAACACAACCTTTCTTTGACCCCGCCGGAGGAGGTGACCCCATCCTCTATCAACACCT
    ATTCTGATTCTTTGGCCACCCAGAGGTATACATTTTAATTCTTCCCGGCTTCGGAATG
    ATTTCCACATTGTTGCATACTATGCAGGTAAGAAAGAACCCTTTGGCTACATGGGC
    ATAGTCTGGGCTATGATAGCTATCGGACTGCTGGGCTTCATCGTATGGGCCCATCAC
```

ATGTTTACGGTTGGAATAGATGTGGACACACGAGCCTACTTTACTTCTGCCACAATG  
ATTATCGCCATCCCAACAGGCGTTAAAGTCTTTAGCTGACTCGCAACCCTTCATGGA  
GGAAGCATTAAATGAGAAACCCCGCTTCTGTGGGCTCTCGGCTTCATTTTCCTATTT  
ACAGTAGGCGGCCTTACTGGTATTGTTTTAGCTAACTCCTCTCTAGACATCGTTCTTC  
ACGACACATACTATGTAGTAGCCCACTTCCACTATGTACTATCTATGGGTGCTGTGT  
TTGCAATCGTTGCCGCCTTCGTACACTGATTCCCCCTTTTTACAGGATATACCCTTCA  
CTCCGCATGAACAAAAATCCACTTTGGCCTTATATTTGTAGGAGTTAATCTTACATTC  
TTCCCCCAGCACTTCCTTGGCCTGGCCGGAATGCCTCGACGGTACTCGGACTACCCA  
GATGCATACACCCTTTGAAATACTGTCTCATCGATCGGGTCACTAATGTCCCTCGTC  
GCTGTGATTTTATTTTTGTTTATTATTTGAGAAGCATTACAGCCAAACGAGAAGTC  
GGAGCAGTAGAATTAACCTCAACTAATATTGAATGACTTTACGGCTGCCCCCACC  
TACCACACATTTGAGGAGCCCGCATTCGTTCAAGTTCGTATAAACTAAATGGCACAT  
CCGTCACAACCTGGGGTTTCAGGACGCAGCTTCCCCCCTAATAGAAGAACTACTTCAC  
TTCCACGATCACGCCTTAATAATTGTCATTCTCATCAGCGCAATAGTGCTTTATATTA  
TTGTGGCAATGGTCACGGCCAAACTAACCGACAAACTTGTATTAGATTCTCAAGAAA  
TTGAAGTAATCTGGACAGTTCTCCCAGCTATTATCCTAATTCTCATCGCCCTGCCGTC  
TCTCCGCATTTTATACTTAATGGACGAAATTAACGACCCCCACCTAACAATCAAAGC  
CTTAGGCCACCAATGATACTGAAGCTACGAATATACAGACTACCAAGACCTTGGTTT  
TGACTCCTATATGATTCCAACACAAGACCTAACCCCTGGGCAATTCCGACTGCTTGA  
AGCAGACCACCGAATGGTAATTCCCGTCGAATCCCCAATTCGAGTCCTTATTTACGC  
TGAAGATGTCTTACATTCTGAGCAGTCCCCTCGCTCGGCGTAAAAGTTGATGCTGT  
GCCTGGCCGATTAAACCAAGCAACCTTTATTGTTAGCCGACCGGGCGTCTTCTACGG  
CCAATGCTCTGAGATTTGCGGGGCGAACCATAGTTTTATACCCGTCGTTGTAGAAGC  
AGTCCCCTTGACCACTTTGAAGACTGGTCTTCGCTAATAATTGAAGACGCCTATGG  
CCCCTCAAGCGCACCCGTACCACATAGTTGACCCTAGCCCATGACCCCTCACGGGGG  
CTATCGCTGCCCTATTGATAACATCTGGCCTTGCTATCTGATTCCACTTCCACTCTAC  
CACCCTAATAACTATTGGGACAATTCTTCTTACTTTAACAGTCTTCCAGTGATGACG  
AGATGTTATTCGAGAAGGAACATTTCAAGGACACCACACCCCTCCGGTTCAAAAAG  
GCCTCCGATACGGTATAATCCTTTTTATTACCTCAGAAGTCCTATTTTTCTTAGGCTT  
CTTCTGGGCTTTTTACCCTCAAGCCTCGCACCAACCCCGAGCTAGGGGGTTTCTG  
ACCCCCCGCAGGTATTACCCCTCTAGACCCATTTGAAGTCCCCTTCTTAACACAGC  
AGTACTGCTTGCCTCTGGCGTAACTGTTACATGAGCACACCACAGCATTATGGAGGG  
TGAACGAAAACAAGCTATCCAATCTCTTGCTCTCACAATCTTACTCGGGGGGTACTT  
CACCTTCCTACAAGGCCTTGAATACCACGAAGCTCCATTACCATTCGAGACGGAGT  
GTACGGTGCCACATTCTTTGTTGCCACTGGCTTCCACGGACTTCACGTTTTAATTGGC  
ACCTCTTTCTTAGCCGTTTGTCTGTTACGCCAAGTACTTCACCACTTTACATCCGACC  
ACCATTTTGGCTTTGAGGCAGCCGCATGATACTGACACTTTGTAGACGTTGTCTGAC  
TCTTCCTCTATATCTCTATCTACTGATGAGGATCTTAATGGCCAATCTCCGTAAATCC  
CACCCCTTCTTAAATCGCAAATGATGCTGTAGTGACCTCCAGCCCCCTCCAAC  
ATCTCTGTCTGATGAAACTTCGGGTCTCTCTTGGGGCTCTGCTTAGTAACTCAGATCG  
CTACCGGCTTATTCTTAGCCATACTACACATCAGATATTGCTACTGCCTTCACATC  
CGTTGCACACATCTGTCGAGATGTTAACTACGGCTGACTTATCCGAAGCATTTCATGC  
CAATGGCGCATCATTCTTTTTTCAATTTGCATTTACCTTCACATCGGCCGTGGTCTCTAC  
TATGGTTCCCTACCTTTATAAAGAAACATGAACTATCGGTGTTGTACTTCTCCTCCTCG  
TAATAATGACCGCTTTCGTTGGATACGTCCTCCCTTGAGGACAAATGTCATTTTGAG  
GTGCAACCGTCATTACCAACCTTCTGTCTGCAGTCCCCTATGTTGGGGGCTCCCTCGT  
CCAATGAATCTGAGGCGGCTTTTCTGTAGATAACGCCACACTCACCCGCTTCTTTGC  
ATTCCACTTCCTTTTCCCCTTCATTATCGCAGCCGCCACAGTAATTCATCTACTTTTCC

TCCACGAGACTGGCTCAAACAACCCACCGGATTAAACTCAAACCTCCGATAAAGTC  
CCATTCCACCCCTACTTCACATACAAAGACCTTTTGGCTTTGCAGTCCTTCTTACAGC  
CCTGGCCTCCCTTGCCCTATTCTCCCCAACCTTCTAGGAGATCCTGACAACTTTACT  
CCTGCAAACCCACTTGTTACACCCCCACACATTAAGCCAGAGTGATATTTCTTATTT  
GCCTACGCCATTCTCCGCTCCATCCCAAACAAGCTTGGGGGTGTACTTGCCCTTTTAT  
TCTCCATCCTAGTCCTTATACTTGTCCCTTTCCTACACACTTCCAAACAACGTAGTCT  
CATGTTCCGCCCTGTAACACAGTTTTTGTCTGATCCTTAGTAGCTGACGTAATAATT  
CTGACTTGAATTGGAGGAATACCCGTAGAGCACCCCTTTTGTAAATCATTGGTCAAGTA  
GCATCTCTTATTTACTTCTCCCTCTTCCTAGTCCTTATTC AACAGCAGGTTGAATGG  
AAAACAAAGTCCTTGGATGAAACTATGATTTCAACCCTCATTACGCATATTATTAAC  
CCACTAGCCTTTATTGTACCCGTCTTGTTAGCCGTAGCATTTCCTAACCCCTCCTTGAAC  
GAAAAGTGCTAGGCTACATGCAACTACGAAAAGGTCCTAACATCGTTGGGCCTTAC  
GGCCTCCTTCAACCTATTGCTGACGGCGTAAACTTTTCATCAAGGAACCCGTTCGC  
CCTTCAACCTCCTCACCAGTCTTATTCCTTTTATCACCCATACTCGCACTTACCCTAG  
CCCTTGCACTCTGAGCACCTATACCCTTCCCGTACCCTGTCGTAGACCTTAACCTCGG  
TATTTTGTATTATTCTAGCCCTATCTAGCCTTGCAGTATACTCCATCCTCGGGTCAGGC  
TGAGCATCCAATTCAAAATATGCTCTAATGGGAGCACTCCGTGCTGTTGCACAAACA  
ATTTCTTACGAAGTTAGCCTTGGTCTCATCTTACTCAGCATCATTATCTTTGCAGGAG  
GCTTCACACTCCAAACCTTCAACACAGCCCAAGAAGCTATCTGACTAGTAGTACCTG  
CATGACCCCTGGCTGCCATATGATACATCTCCACCCTCGCCGAAACAAACCGTGAC  
CCTTCGACCTAACAGAGGGGGAGTCTGAACTCGTCTCAGGCTTCAACGTAGAGTAC  
GCAGGAGGGCCCTTCGCTTTGTTCTTTTTGGCCGAATATTCAAATATTCTCCTAATAA  
ACACACTGTCCGCAACACTATTTTTAGGCGCTTCACACATTCCAAACATCCCAGAAT  
TAACAAGCATCAACTTGATAACTAAAGCAGCCCTCCTATCAGTTGTTTTTCTCTGAG  
TCCGAGCTTCGTACCCGCGGTTCCGTTACGACCAACTTATGCACCTTATTTGAAAAA  
ATTTTCTCCCACTAACACTGGCGCTGGTTATTTGACACTTAGCGCTCCCTATTGCATT  
CGCTGGCCTTCACCTCAGCTGTAAATGAACCCCTACATCTTGTCCACCCTTCTATTT  
GGTTTGGGCCTAGGTACAACACTCACATTTGCAAGCTCACACTGGCTTCTCGCATGA  
ATGGGCCTTGAGATTAATACTAGCCATTGTCCCACTAATAGCCCAACATAATCAC  
CCTCGGGCAGTCGAAGCCACTACTAAATACTTCCTGGCACAAGCCACAGCAGCCGC  
CACTCTCCTGTTTGCAAGCACCAACGCTTGAATCACCGGCCAATGAGATATTCA  
ACAGATAACCCACCCACTCCCCACAACCATAGTTGTAATTGCTCTAGCACTAAAAAT  
CGGACTAGCACCTATACACTCTTGACTTCCCGAAGTCCTTCAGGGCTTAAACCTCAC  
CACTGGTCTTATTTTGTCAACCTGACAAAAGCTTGCACCATTTGCCCTATTGCTACAA  
ATTCAAACAACAACCCACCCCTCTAATCATCATTGGCCTTCTCTCTGCCCTTATTGG  
CGGCTGAGGTGGCCTCAACCAAACCTCAGCTACGCAAAGTCCTTGCCCTACTCCTCAAT  
CGCTCACCTTGGCTGAATAATACTTATTCTTCAATTTTCACCTCTCCTGAGCCTCCTT  
GCACTCCTGACATATCTTCTATGACCTTCTCAGCCTTCCTTATCTTCAAAGTAAACAA  
AGCCACTACCGTTAATGCACTCGCAATCTCTTGAGCCAAAACCTCCCGCCCTTACAGC  
CCTCGCACCCCTTGTTTTACTCTCCCTCGGAGGCCTCCCACCACTAACAGGCTTCATA  
CCAAAATGATTTATTCTTCAAGAACTCACTAAACAAGACCTGCCACACTTGCTACCC  
TCGCTGCATTAACCGCACTCTTAAGCCTCTACTTCTACCTCCGACTCTCATATGCTAT  
GACCCTAACAATATTCCCCAATAACCTCATTGGCATGACCCCTGACGATTCTCCAC  
CCCCAATTCACCCTTCCCCTCGCCATTTCCACTGCGGCAACTACGCTTCTCCTCCCA  
TTAGCACCTGCTGCCGTAGCTCTCCTCATAGCCTATGAGCCTTCTTCTAACCATCATT  
TCAATTACCGCCCTCCTCTCAACAGTTCTTGCCATTGTATCCTTTTGACTCCCCCAA  
TTACACCAGACTATGAAAAACTGTCACCATACGAGTGTGGCTTTGACCCCATTTGGTT  
CCGCCCCGACTACCTTTCTCAATGCGATTTTTTCTCATCGCTATCCTCTTTCTTCTTC

GACTTAGAAATTGCCCTTCTCCTCCCTCTCCCCTGAGGTGATCAATTGACATCCCCC  
TACTTACATTTACCTGAGCCACAGTGGTTCTATCACTCCTAACCCTTGGCCTCATCTA  
TGAGTGAGTGCAAGGAGGCCTAGAATGGGCTGAATATGCTAAAAATTCTAATCCCA  
ACACTTATGCTAATTCCAACAGCCTGACTACTTAAACCTAGCTGGCTTTGACTCATA  
ACTCTGTTATATAGCTTTTGCATCTCCCTAGCTAGCCTTTCATGATTAAAGAACCTCT  
CGGAAACCGGCTGAACCTCACTCAACCTATTTATAGCCACCGACTCCTTGTCAACAC  
CACTTCTCGTTCTAACATGTTGACTACTTCCCCTAATAATCTTGGCAAGCCAAAAAC  
ACACAGCCTCAGAGCCCCTGAATCGGCAGCGCATATACATCTCACTTCTCGCCTCCT  
CCAGTTTTTTCCTGATCCTAGCATTTCAGCGCCACAGAACTAGTAATGTTCTACGTAAT  
ATTTGAAGCTACCCTTATCCCCACACTGATTATTATTACCCGCTGAGGTAACCAAAC  
AGAGCGCCTAAACGCAGGAACCTACTTCCTCTTTTATACACTAGCAGGCTCACTTCC  
CCTTCTTGTTGCCTTACTCTTACTCCAAAATACATCCGGAACCTCTCTCATTATTAACA  
CTCCACTATACAGACCCACTTGCTGTCATCCTATGCAGACAAATTATGGTGAGCCGG  
ATGTCTGCTAGCTTTTCTGGTTAAAATACCACTTTACGGTGTTACCTGTGACTTCCA  
AAAGCACACGTTGAAGCCCCAATTGCAGGCTCAATAATTTTTGCAGCAGTTTTGCTT  
AAGCTGGGAGGTTACGGCATAATCCGCATAATAACAATACTAGAGCCCCTAACTAA  
AGAACTAAGCTACCCATTCAATTATCTTCGCACTTTGAGGTGTAATCATAACTGGCTC  
AATTTGTCTACGACAAACCGACCTTAAGTCGTTAATTGCCTATTCTCTGTAGCCAC  
ATGGGCCTCGTAGCCGGAGGAATTCTCATTCAATCCCCCTGAGGTCTCACGGGGGCA  
CTAACACTTATGATTGCTCACGGCCTTACCTCCTCAGCCCTATTCTGCCTAGCAAATA  
CAAACCTATGAGCGGACTCACAGCCGCACAATAGTTTTGGCACGAGGACTGCAAGTA  
GCACTGCCCCTAATAGCCACCTGATGATTTCGTTTCAAGTCTAGCCAACCTAGCCCTA  
CCACCACTACCCAACCTCATGGGGGAGCTAATAATTATCACCTCCCTCTTTGACTGA  
TCCTGGTGAACGCTCGCACTAACAGGGTCCGGAACCCTCATTACCGCTGGCTACAGC  
CTCTATATGTTCTTAATAACTCAACGAGGCCCTCTCCCAACACATGTGATTGCACTTG  
AACCCTCACACACCCGAGAACATCTCCTTATTGCCTTCACCTTATTCTCTTGTGCTT  
CTCGTACTTAAACCCGAGCTGATCTGAGGCTGAACTGCCTATGACCCCAACACACTT  
TGCCTTCTCCTCAGCCTTTTTTTCTAGGTTCAACAGGCCTGGCATTCCACCGGTCCCAC  
CTCCTTTCCGCACTACTGTGCCTTGAAGGTATAATACTGTCCCTATTTATTGGCCTTT  
CCCTCTGAACGCTGCAACTAGACTCAACCAACTTTTCAGCATCCCCGCTACTTCTACT  
CGCATTTTCAGCCTGTGAAGCAAGCGCCGGGCTCGCTCTTCTGGCAGCCACTGCCCCG  
AACCCACGGAACCTGACCGACTACAAAGCTTAAACCTCCTCCAATGCTAAATGCACC  
CCACCTCCCTAATGATCTCATCAAGCTTGATTACAATCTTTGCATTACTAGCCTACCC  
CCTGGCCACCACCTTTCGTCTACACCTCAGGGGCCTCAATGAGCTACATCTCATGT  
CAAAACAGCTGTAAAGATAGCTTTCTTTGTTAGCCTCCTGCCCCTCGCCCTATTCTT  
AATGAGGGGGGCGAGACAATTGTTACTAACTGAGCCTGAATAAACACTAACACCTT  
CAACATCAACATTAGCCTTAAATTTGACTTTTATTCCATTATTTTTACACCAATTGCC  
CTCTACGTTACTTGATCCATTCTGGAGTTCGCCTCATGATACATACAGCTGACCCAC  
ACGTAAACCGCTTTCTTAAGTACCTTCTAACCTTTCTTATTGCCATAATCATCCTAGT  
AACTGCAAACAATATATTTCAACTCTTTATTGGCTGAGAGGGCGTAGGGATCATGTC  
CTTCCTCCTCATCGGGTGATGATACGGACGCGCAGACGCCAATACTGCAGCACTTCA  
AGCAGTACTATATAACCGAGTCGGAGACATCGGACTAATCTTCGCCATAGCTTGAAT  
AGCAACAAACCTGAACTCCTGAGAAATACAACAAATCTTCGCAACTTCTAAAGACA  
TGGACTTAACATATCCCCTCATTGGGCTAATCATCGCAGCAACCGGGAAGTCAGCTC  
AATTTGGGCTCCACCCTTGGTTACCATCGGCCATGGAAGGTCCTACACCGGTATCTG  
CCCTACTTCATTCTAGCACAATAGTCGTGGCCGGCATCTTCCTGCTGGTACGAATGA  
GCCCCTTCTGGAAAACAACCCAATTGCCCTAACAACCTGTCTCTGTCTCGGAGCCC  
TCACAACCCTATTCACTGCAACCTGCGCTTTAACACAAAATGACATTAAAAAAATCG

TCGCATTTTCTACATCCAGCCAGCTTGGACTCATGATAGTAACCATCGGACTAAACC  
AACCACAACCTAGCATTTCTACACATCTGTACACACGCCTTCTTTAAAGCCATACTAT  
TTCTTTGCTCAGGGTCTATTATTCATAGCCTCAACGACGAGCAAGACATCCGAAAAA  
TGGGAGGCATACACCACCTTGCGCCCTTTACATCATCTTGTTTAACAATCGGGAGCC  
TCGCACTTACGGGCACCCCTTCTTAGCTGGTTTCTTCTCTAAAGATGCCATCATCGA  
AGCATTAACACCTCCCATTTAAACGCCTGAGCCCTAACCTTACCCTCCTGGCCAC  
CTCTTTTACAGCAATCTACAGCTTCCGTGTAGTCTTCTTTGTGCCTATAGGCCACCCC  
CGATTTAACCCATATCCCCTATCAACGAAAACAACCCCGCAGTAATTAACCCACTTA  
AGCGCCTGGCATGGGGGAGTATCATTGCAGGACTCCTAATTACCTCAAATATCACAC  
CCCTAAAAACCCAGTGATGTCCATGCCTCCCCTCCTAAACTAGCTGCCCTTGCGAG  
TTACAATCATCGGCCTACTTGTTGCCATAGAAGTTGCCATGTTAACCAACAAACAAT  
TTAAATCAACCCCTATCTTAACGTACACAACCTTCTCTAATATGCTAGGCTTTTTCCCT  
GCCATTGTACACCGACTAACCCCTAAACTAGGCCTCGTTCTCGGCCAAGACATCGCC  
AACCAAATAGTGGATCAAACCTGATTAGAGAAAGCAGGCCCCAAAGCCGTTGTATC  
TTTCAACCTCCCCTAGTCTCTACAGCAAGCAACATCCAACGAGGAATAATCAAAAC  
CTATCTGCCCTCTTCCTTTTAACTCGCCCTTATTGTCGCAACGTCCCTCGCACAAAT  
GGCTTTTGTTATATATTTTATTTTATTTTCTTCGTGCTGGGGTTAGTTGCAGTTGCTT  
CTAATCCATCCCCCTACTATGCCGCTTACGGCTTAGTTGTGGTAGCTGGGATGGGGT  
GTAGTGTGTTAATTGGGCATGGGGCTCCTTTCTTATTTATAATTCTATTCCTAATTTA  
TCTGGGCGGGATGTTGGTTGTGTTTGCATTTCGAGTAGCGATAGCTTCTGAGCCGCA  
TCCGGTTGGTTGAAATTCTTGGGCAGTATTGGGTTACGCTTGTTTACATGGCAGCTA  
CCGTGCAGTTGCGGGGGTACTTCGAGGGGGATGGTATGAGTCGTCTTGGGTGACAG  
TAGATGGATTTGGGGAGACTGAGCTGTTTCGGGGTGATCTCGGTGGGGTGGCCATG  
GTATATGGTTCTGGGGGAGGGCTTCTAGTTATTAGTGCGGGGGTATTGCTTTTAAACG  
CTTTTGTGGTCCTTGAGTTAGCCGGCCCATGTGCCGAGGGACGTTGCGACAATAA"/>

<sequence id="seq\_Hippoglossoides\_platessoides\_MN122825" spec="Sequence"  
taxon="Hippoglossoides\_platessoides\_MN122825" totalcount="4"  
value="ATGATACTAAGCTTCTTTGACCAATTTATGTCTCCCGTATTCCTTGGCATCCC  
CCTAATTGCCCTAGCAATTACACTGCCCTGAACCCTATTCCCTGCCCCTGTCTTCGCT  
GATTAAACAACCGTATAGTCTCACTTCAAGGGTGGTTTATTAGCGGCTTTACGTCTC  
AACTTCTTCTCCCCCTAAATCCAGCCGGGCACAAATGAGCGATTTTGTTCGCCTCAC  
TAATCTTTTCTTTTTCTATTAACATGCTCGGACTCCTTCCGTATACATTTACACCTACA  
ACTCAACTCTCGCTTAACCTCGGCCTTGCAGTCCCCTCTGACTGGCAACTGTCATTA  
TGGTATACGGAACCAACCAACAGTCGCACTAGGCCACCTTCTTCCAGAAGGGACTC  
CCACCCCTCTCATCCCGGTACTAATTATTATCGAAACAATTAGCCTCTTTATCCGACC  
TCTCGCTCTCGGTGTTTCGGCTTACAGCAAATCTTACAGCTGGCCACCTGCTCATCCA  
ACTCATTGCAACAGCTGCCTTCGTTCTTCTTCCGCTTATGCCTGTTGTTGCTATTTTAA  
CAACAACAGTTCTCTTTCTCCTCACTCTCCTAGAAGTTGCAGTTGCTATAATTCAAGC  
CTATGTCTTTGTTTTACTACTAAGCCTTTACCTACAAGAGAACGTCTAATGCCCCAAC  
TGGACCCCGCACCCCTGATTTGCAATTTTGGTTTTCTCTTGAATAATCCTTTTAACTGT  
TATTCCCCCAAAAGTTTTAGCTCACACTTACCCAAATGAGCCAACCTCCCAAAGCAC  
ACAAAAACAAAACAGAACCTGAAACTGACCATGATACTAAGTGGCAATCACACGT  
TGATTTTCTCGACCAATCACAAAGACATCGGCACCCCTCTATCTCGTATTTGGTGCCT  
GAGCCGGAATAGTGGGGACAGGCCTAAGTCTGCTCATTGAGCAGAACTCAGCCAA  
CCCGGGGCTCTCCTGGGAGACGATCAAATTTATAACGTGATCGTTACCGCACACGCC  
TTTGTAATAATCTTCTTTATAGTAATACCAATTATGATCGGAGGGTTCGGAAACTGA  
CTTATCCCCTAATGATCGGAGCCCTGATATGGCTTTCCTCGGATAAATAACATG

AGCTTCTGACTTCTACCCCCATCATTTCTTCTCCTCTTGGCCTCTTCAGGCGTAGAAG  
CCGGGGCTGGTACTGGTTGAACCGTGTATCCTCCCCTTGCTGGAAATCTGGCACACG  
CCGGAGCGTCCGTAGATCTCACAATTTTCTCTCTTCACCTTGCCGGAATTTTCATCAAT  
CCTGGGAGCAATCAACTTTATTACCACCATCATCAACATGAAACCTACGGCGGTAC  
TATATACCAAATCCCCTATTTCGTGTGAGCCGTAATAATTACGGCAGTTCTTCTTCTC  
CTTTCCCTTCCGGTCTTAGCCGCTGGCATCACAATGCTACTAACAGACCGCAACCTA  
AACACAACCTTTCTTTGACCCTGCCGGAGGGGGTGATCCCATCCTCTACCAGCATCTA  
TTTTGATTCTTTGGTCACCCAGAGGTATACATTTTAATTCTTCCTGGCTTCGGAATGA  
TTTCTCACATTGTTGCATACTATGCAGGTAAGAAAGAACCCTTCGGCTACATAGGAA  
TAGTCTGGGCTATGATAGCTATTGGACTTCTGGGCTTCATCGTATGGGCCCATCACA  
TGTTTACAGTTGGTATGGATGTGGACACACGTGCCTACTTTACTTCTGCCACAATAA  
TTATTGCCATCCCAACCGGCGTAAAAGTCTTTAGCTGACTCGCAACCCTCCATGGGG  
GAAGCATCAAGTGAGAAACCCCGCTTCTGTGGGCTCTAGGCTTTATTTTCTATTTA  
CAGTGGGGGGCCTTACTGGCATTGTCTTAGCTAATTCTCTCTCGACATCGTTCTCCA  
TGACACATACTATGTAGTAGCCCACTTCCATTATGTACTATCTATGGGTGCTGTATTT  
GCAATCGTTGCTGCCTTCGTACACTGATTCCCCCTATTCACAGGCTACACCCTTCACT  
CCGCATGAACAAAAATCCACTTTGGCCTAATGTTTGTAGGAGTTAACCTCACATTCT  
TCCCCCAGCATTTTCTTGGCCTGGCCGGAATACCTCGACGGTACTCCGACTACCCGG  
ATGCATATACCCTTTGAAACACTGTCTCATCAATCGGGTCACTAATGTCCCTCGTTGC  
TGTAATTTTATTTTGTATTATTGAGAAGCATTTACAGCCAAACGAGAAGTCGG  
AGCAGTAGAACTTACTTCAACTAATATTGAATGACTTTACGGCTGCCCCCACCCTA  
CCACACATTTGAGGAGCCCGCATTCGTCCAAGTTCGTATAAACTAAATGGCACATCC  
GTCACAACCTGGGGTTTCAGGACGCAGCTTCCCCCCTAATAGAAGAACTACTTCACTT  
CCATGATCACGCCTTAATAATTGTTATTCTCATCAGCGCAATAGTACTTTATATTATT  
GTGGCAATGGTCACGGCCAACTAACCGACAAACTTGTCTTAGATTCTCAAGAAATT  
GAAGTAATCTGGACAGTTCTCCAGCTATTATTCTAATTCTCATCGCCCTCCCGTCTC  
TCCGCATTTTATATTTAATGGACGAAATTAACGACCCCCACCTAACAATTAAAGCGT  
TAGGCCACCAATGATACTGAAGCTACGAATACACAGACTACCAAGACCTTGGTTTTG  
ACTCCTACATGATTCCAACACAAGACCTAACCCCTGGTCAGTTCCGACTACTCGAAG  
CAGACCATCGAATAGTAATTCCTGTAGAATCCCCAATTCGAGTCCCTATCTCAGCTG  
AAGATGTTCTGCACTCCTGAGCAGTCCCCTCCCTGGGCGTGAAAGTTGATGCTGTGC  
CTGGACGACTAAACCAAGCAACCTTTATTGTTAGCCGACCAGGCGTATTCTACGGCC  
AATGCTCTGAGATTTGCGGGGCAAACCATAGTTTTTATACCCGTCGTTGTAGAGGCAG  
TCCCACTTGACCACTTTGAGGACTGGTCTTCGCTAATAATTGAAGACGCCTATGGCC  
CCTCAAGCGCACCCCTACCATATAGTCGACCCTAGCCCATGACCCCTCACGGGGGCT  
ATCGCTGCCCTATTGATAACATCTGGCCTTGCTATCTGATTCCACTTCCACTCTACCA  
CCCTAATAACTATCGGAACAATCCTTCTTATTTTGACAGTCTTCCAGTGATGACGAG  
ATGTCGTTCCGGGAGGGCACGTTTCAAGGACACCACACTCCCCCGTACAAAAAGGC  
CTCCGATACGGTATAATCCTATTTATTACCTCAGAAGTCCTATTTTTCTTAGGCTTCT  
TCTGGGCTTTTTTACCACTCAAGCCTAGCACCTACCCCGACCTGGGCGGTTTCTGAC  
CACCCGCAGGCATTACCCCATTAGACCCGTTTGAAGTCCCCTTCTTAACACAGCAG  
TCCTTCTTGCTCTGGCGTAACCTGTTACATGAGCACATCACAGTATCATAGAAGGTG  
AGCGAAAACAAGCTATCCAATCTCTCGCTCTTACAATCTTGCTCGGTGGATACTTCA  
CCTTCTCCAAGGCCTTGAATACCACGAAGCCCCCTTACCATTGCAGACGGAGTTT  
ACGGTGCCACATTCTTTGTTGCAACCGGCTTCCACGGACTTCACGTCTTGGTTGGCTC  
CTCTTTTTTAGCCGTTTGTCTATTACGTCAAATCCTACACCATTTTACATCCGACCAC  
CATTTTGGCTTTGAGGCAGCCGCATGGTACTGACACTTTGTAGACGTCGTCTGACTC  
TTCTCTATATCTCTATTTACTGATGAGGATCTTAATGGCCAACCTCCGTAAATCCCA

CCCCCTTCTTAAAATCGCAAACGATGCTTTAGTCGACCTTCCAGCCCCCTCCAACAT  
CTCTGTCTGGTGAAACTTCGGGTCTCTCTTAGGACTCTGTTTAGTGACCCAGATCGCT  
ACCGGCTTATTCTTAGCCATACACTATACATCAGATATTGCTACTGCCTTTACCTCTG  
TTGCACACATTTGCCGAGACGTCAACTACGGCTGACTTATCCGAAGCATTTCATGCCA  
ATGGCGCATCATTCTTTTTTCATTTGCATTTACCTCCATATCGGCCGTGGCCTATACTA  
TGGCTCCTACCTCTATAAGGAGACATGAACTATTGGTGTGTTCTACTTCTTCTAGTA  
ATAATGACCGCTTTCGTTGGATACGTCCTCCCTTGAGGACAAATGTCGTTTTGAGGT  
GCAACCGTCATTACCAACCTTCTGTCTGCGGTCCCCTATGTTGGAGGCTCCCTCGTCC  
AATGAATTTGGGGGCGGCTTTTCTGTAGATAACGCCACCCTTACCCGATTCTTTGCATT  
CCACTTCCTTTTCCCATTTCATCATCGCAGCCGCTACAGTGATTCATCTACTTTTCCTC  
CATGAAACTGGTTCAAATAACCCACCGGACTAAACTCAAACCTCCGATAAAGTCCC  
GTTCCACCCTTACTTCACGTACAAAGACCTTCTGGCTTTGCAGTCCTTCTTACTGCTC  
TGGCCTCCCTCGCTCTCTTCTCCCCAAATCTTTTAGGAGACCCTGACAACTTTACCCC  
TGCAAACCCGCTTGTTACACCCCCACACATCAAGCCCGAATGATACTTCCTATTTGC  
CTACGCCATTCTCCGCTCCATCCCAAACAAGCTTGAGGGCGTACTTGCCCTGCTATT  
CTCTATCCTTGTTCTTATGCTTGTCCCCTTCCTTCACACTTCCAAACAGCGGAGCCTC  
ATGTTCCGCCCTATAACACAGTTTCTGTTCTGGTCTTTAGTAGCTGACGTAATAATTC  
TGACTTGAATTGGAGGGATACCCGTAGAGCACCTTTTCGTTATCATTGGCCAAGTAG  
CATCCCTTATCTACTTCTCCCTCTTCCTAGTCCTTATCCCAACAGCAGGCTGAATGGA  
AAACAAAGTCCTCGGATGAAACTATGATTTCAACCCTCATTACGCATATTATTAACC  
CACTAGCCTTTATTGTCCCGGTCTTGTTAGCCGTAGCATTCCCTACCCTCCTTGAACG  
AAAAGTGCTAGGCTACATACAACTCCGAAAAGGTCCTAACATCGTTGGGCCTTACG  
GCCTCCTTCAACCTATTGCTGACGGCGTAAACTCTTCATTAAAGAACCCGTCCGTC  
CTTCGACCTCCTCACCAGTTTTATTCTCTTATCACCCATGCTCGCACTTACACTGGC  
TCTTGCACTTTGAGCCCCATACCTTTCCCGTACCCCGTCGTGGACCTTAACCTAGGC  
ATTTTATTTATTCTAGCCCTGTCTAGCCTTGCGGTATACTCCATCCTCGGGTCAGGCT  
GAGCATCTAATTCAAATATGCTCTAATGGGGGCACTGCGTGCTGTTGCACAAACAA  
TTTCTTACGAAGTTAGCCTGGGGCTCATCTTACTCAGCATCATTATCTTTGCAGGAGG  
CTTCACCCTCCAAACCTTTAATACAGCCCAAGAAGCTATTTGACTGGTAGTACCCGC  
CTGACCGCTCGCCGCCATGTGATACATCTCCACCCTTGCCGAAACAAACCGTGCACC  
CTTCGATCTAACGGAGGGGGAGTCTGAACTCGTCTCGGGCTTCAACGTAGAGTACGC  
AGGAGGACCTTTCGCTTTGTTCTTTTTAGCCGAATATTCAAACATTCTCCTAATAAAT  
ACACTGTCCGCAACACTATTTTTAGGCGCCTCACACATCCCAAACATCCCAGAACTA  
ACAAGTATTAACCTAATAACTAAAGCAGCCCTTCTATCCGTTGTTTTTCTCTGAGTCC  
GAGCCTCGTACCCACGATTCCGTTACGACCAGCTTATGCACCTCATTTGAAAAAACT  
TTCTTCCATTAAACACTGGCCCTGGTTATTTGACACTTAGCGCTCCCTATTGCATTTCGC  
TGGCCTCCACCTCAGCTGTAGATGAACCCCTACATCTTGTCCACCCTTCTATTTGGT  
TTGGGCCTAGGTACAACACTCACATTTGCAAGCTCGCACTGACTTCTCGCGTGAATG  
GGCCTTGAGATTAATACTAGCCATTATCCCACTAATAGCGCAACACCACCACCCT  
CGGGCTGTGCAAGCCACTACTAAATACTTCCTAGCACAAGCCACAGCAGCCGCCAC  
CCTCCTATTTGCAAGCACCAACGCTTGGATCACCGGCCAGTGAGATATTCAACA  
AATAACGCACCCCTCCCCACGACAATGGTTGTAATTGCCCTCGCACTAAAAATCGG  
ACTAGCACCTATACACTCTTGACTCCCCGAAGTTCTTCAGGGCCTAAGCCTCACAC  
CGGTCTTATTTTGTCAACCTGACAAAAGCTTGACACCTTTTGCTCTGCTACTACAAATT  
CAAACAACAATCCCACCCCTCTGATTATTATTGGCCTTCTCTCTGCACTTGTTGGGGG  
CTGAGGTGGCCTCAACCAAACCAACTGCGCAAAGTCCTTGCTTATTCCTCAATCGC  
TCACCTTGGCTGAATAATACTCATCCTTCAATTCTCACCCCTCCTGAGCCTCCTTGCA  
CTCCTAACATATTTTCTATGACCTTTTCAGCCTTCCTCATCTTCAAGGTAAACAAGGC

CACCACTGTCAACGCACTCGCGATCTCCTGAGCAAAAGCTCCCGCCCTCACAGCCCT  
AGCACCTCTCGTCTTACTTTCCCTGGGGGGTCTTCCACCCTAACAGGCTTTATACCA  
AAATGGTTTATTCTTCAGGAGCTAACTAAACAAGATCTGCCACGCTTGCTACCCTTG  
CTGCACTAACTGCCCTCTTAAGCCTTTACTTCTACCTACGCCTCTCGTATGCTATGAC  
CCTTACGATATTCCCGAATAACCTCGTTGGCATGACCCCTGACGATTTTCCACCCCC  
CAATTCCTCTCCCCCTCGCAGTTTCCACTGCAGCAACCACTCTTCTCCTGCCATTAG  
CACCTGCTGCCGTAGCACTCCTCGTCACCTATGAGCCTTCTTCTAACCATCATTTCAA  
TTACCACCCTCCTTTCAACGGTACTTGCCATTGTGTCTTTCTGACTCCCCCAAATTAC  
GCCGGACTATGAAAACTGTCACCATACGAATGTGGCTTTGACCCCATTTGGTTCCGC  
CCGACTACCTTTTTCAATGCGATTTTTTCTCATCGCCATCCTCTTTCTCCTCTTCGACT  
TAGAAATTGCACTTCTTCTCCCCCTTCCCTGGGGTGACCAACTAGCCTCCCCCTACT  
TACCTTTACCTGAGCTGCAGCAGTCCTATCGCTTCTGACCCTTGGCCTCATCTACGAG  
TGAGTGCAAGGAGGCCTAGAATGAGCTGAATATGCTAAAGATTTTAATTCCAACAC  
TTATGTTAATTCCAACAGCCTGACTACTTAAGCCTAGCTGACTTTGACCCATAACTTT  
ATTGTATAGCTTCTGCATCTCCTTGATTAGCCTTTCATGATTAAAGAACCTCTCGGAA  
ACCGGCTGATCCTCACTCAACCTATTTATAGCCACCGACTCCTTATCAACACCCCTCC  
TTGTTCTAACATGTTGACTACTTCCCCTGATAATCCTAGCAAGCCAGAAACACACGG  
CCTCGGAACCCCTCGGTCGACAGCGCATGTATATTTCACTTCTCGCCTCCTCCAATTT  
TTCCTGATTCTAGCATTTAGCGCCACAGAACTCGTGATATTCTACGTAATATTTGAA  
GCCACCCTCATTCCCACACTGATCATTATTACCCGCTGAGGTAATCAAACAGAACGC  
CTAAATGCGGGGACCTACTTCCTCTTTTATACATTAGCAGGCTCACTTCCTCTTCTTG  
TTGCTTTACTTTTACTACAAAATACATCCGGAACCTCTCTCATTATTGACACTCCACTA  
TACGGACCCGCTTGCTGTCATCTTATGCAGACAAATTATGATGAGCCGGATGTCTCC  
TGGCTTTCCTCGTTAAAATACCACTTTATGGTGTTACCTCTGACTCCCTAAAGCTCA  
CGTTGAAGCTCCAATTGCAGGCTCAATAATCCTTGACGCGGTTTTACTTAAACTAGG  
GGGTTACGGCATAATCCGCATAATAACAATACTAGAACCCCTAACCAAAGAGTTAA  
GCTACCCCTTTATTATCTTTGCACTCTGAGGTGTAATCATAACTGGCTCGATTTGCCT  
ACGACAAACGGACCTCAAGTCGTTAATTGCCTACTCCTCTGTTAGCCACATAGGCCT  
CGTGGCCGGAGGGATTCTCATTCAATCACCTGAGGACTGACAGGAGCACTCACAC  
TTATAATTGCACACGGCCTTACTTCCTCCGCCTTATTCTGCCTAGCAAATACAACTA  
TGAACGAACTCATAGCCGCACTATGGTTTTAGCGCGAGGACTTCAAGTGGCCCTACC  
TCTAATAGCCACTTGATGATTCATCTCGAGTCTAGCCAACCTAGCCTTACCACCCT  
ACCTAACCTTATGGGGGAACCTAATAATTATTACCTCTCTTTTTGACTGATCCTGATGA  
ACGCTCGCACTTACAGGGTCCGGAACCTCTTATTACCGCTGGCTACAGCCTTTACATA  
TTCTTAATGACACAACGAGGCCCTCTCCCGACACATGTAATTGCGCTTGAACCCTCG  
CACACCCGAGAACATCTTCTTATTGCCTTCACCTTATCCCTCTTGTTCTTCTTGTGCTT  
AAGCCCGAGCTGATCTGGGGTTGAACTGCCTATGACCCCAACACACTTTGCCTTCTC  
CTCAGCCTTTTTTTCTAGGTTTAAACAGGCCTGGCATTCCACCGGTCCACCTCCTTTCC  
GCACTATTGTGTCTTGAAGGAATAATGTTGTCCCTGTTTGTGTCCTCTCCCTGTGAA  
CGCTGCAACTAGACTCAACTAACTTTTTAGCATCTCCACTACTTCTGCTTGCATTCTC  
AGCCTGTGAAGCAAGCGCCGACTAGCCCTTCTGGTAGCCACTGCCCCGAACCCACG  
GAACTGACCGACTACAAAGCCTAAACCTCCTCCAATGCTAAATGCACCCCACTCCC  
TAATGATCTCATCAAGCTTGATTACAATCTTTGCATTACTAGCCTACCCACTGGTCAC  
CACGTTCCATCCTACGCCTCGAGGGCCTCAATGAGCTACATCCCATGTCAAAACAGC  
TGTA AAAAATAGCTTTCTTTGTTAGCCTCTTACCCCTCGCCCTATTCCTTAATGAAGGC  
GCCGAGACGATTGTTACTAACTGAGCCTGAATAAAACACTAACACTTTCAACATCAAC  
ATTAGCTTAAAATTTGACTTTTATTTCGATTATTTTTACACCAATTGCTCTTTACGTTAC  
TTGGTCCATTCTAGAGTTCGCCTCATGATACATGCACGCTGATCCACACGTGAACCG



CTTTTTTAAGTACCTTCTAACCTTTCTTATTGCTATAATTATTCTCGTAACTGCAAAC  
AACATATTTCAACTATTCATCGGATGAGAGGGCGTGGGGATCATATCGTTCCTCCTC  
ATCGGGTGGTGGTACGGACGAGCGGACGCTAATACTGCAGCACTTCAAGCAGTACT  
GTACAACCGAGTGGGGGATATTGGACTTATCTTCGCCATGGCCTGAATGGCAACAA  
ACCTAAACTCCTGGGAAATACAACAAATCTTTGCAACCTCTAAGGATATGGACTTAA  
CCTATCCCCTCATCGGACTAATCATCGCGGCAACCGGGAAGTCAGCTCAATTTGGGC  
TCCACCCTTGGTTGCCCTCAGCTATGGAAGGTCCTACACCGGTATCTGCCCTACTTCA  
CTCTAGCACTATGGTCGTAGCCGGCATCTTCCTGCTAGTGCGAATAAGCCCGCTTCT  
GGAGAATAACCCGGTCGCCCTCACAACCTGCCTCTGCCTCGGGGGCCTTAACGACCCT  
GTTCACTGCAACCTGTGCCCTTACGCAAAATGACATTAAAAAAATCGTCGCATTTTC  
TACATCTAGCCAACCTAGGGCTCATAATGGTAACCATTGGATTAAACCAACCACAAC  
AGCATTTCTACACATCTGTACACACGCCTTCTTTAAAGCCATGCTGTTTCTTTGCTCG  
GGATCTATTATTCACAGCCTAAACGACGAACAGGACATCCGAAAAATGGGGGGCAT  
ACACCACCTTGCACCTTTTACATCTTCTTGCCTAACAATTGGCAGCCTCGCACTTACA  
GGAACCCCTTCTTAGCTGGTTTCTTCTCTAAAGATGCCATCATCGAAGCATTAAAC  
ACCTCCCATTAAACGCCTGAGCCCTAACCCTAACCCTCCTGGCCACATCTTTTACA  
GCAATCTACAGCTTCCGCGTAATTTTCTTTGTGCCTATGGGCCACCCCGATTCAACC  
CATCTCCCCTATTAACGAAAACAACCCCGCAGTAATTAACCCTCTTAAACGCCTAGC  
ATGAGGCAGTATTATCGCAGGACTCCTAATTACCTCAAATATTACACCCCTGAAAAC  
CCCTGTAATGTCCATGCCTCCCCTCCTAAACTAGCTGCCCTTGCAGTTACAATCGTG  
GGCCTACTTGTGGCCATGGAAGTAGCCATATTAACCAATAAGCAATTTAAATCAACC  
CCTATCTTAACGTACACAACCTTCTCTAACATATTAGGGTTTTTCCCTGCCATTGTACA  
CCGCCTAACCCCTAAGCTAGGGCTCGTTCTTGGTCAGGACATCGCCAACCAGATGGT  
AGATCAAACCTGACTAGAGAAGGCAGGTCCCAAAGCCATTGTATCCTTCAATCTACC  
CTTAGTTTCTACAACAAGCAACATTCAACGAGGAATAATCAAAACCTATCTACCCTT  
TTCCCTTTTAACACTAGCCCTTATTGTGCGAACGTCCCTCGCACAAATGGCTTTTGTTAT  
ATATTTTATTTTATTTTCTTCGTGCTAGGGTTAGTTGCAGTTGCTTCTAACCCGTCGC  
CCTACTATGCCGCTTATGGTTTAGTTGTGGTAGCTGGGATGGGGTGTAGTGTACTAA  
TTGGGCATGGGGCGCCTTTTTTGTCCATGATTTTATTTCTAATTTATCTGGGCGGGAT  
GTTGGTTGTATTTGCATTTCGCAGTTGCGATGGCTTCTGAGCCGCATCCAGTTGGTTGG  
AATTCTTGGGCTGTGTTGGGTACGCTTGTTCATGGCAGCGGTAGTGCAGTTGCT  
GGGGCGCTCTGAGGGGGGTGATATGAATCGTCTTGGGTGACAGTAGATGGGTTTGG  
GGAGACTGAGGTATTTGCGGGGGATCTCGGCGGGGTGGCCATGGTTTATGGCTCTG  
GGGGAGGGTTGTTGGTTATTAGTGCAGGGGTATTGCTTTTAACGCTGCTTGTAGTGC  
TTGAGTTAGCCGGCCCATGTGCCGAGGGACGTTGCGACAATAA"/>

<sequence id="seq\_Hippoglossus\_hippoglossus\_AM749122" spec="Sequence"  
taxon="Hippoglossus\_hippoglossus\_AM749122" totalcount="4"  
value="ATGATACTAAGCTTCTTTGACCAATTTATATCCCCTTCATACCTCGGCATTCC  
ACTAATTGCACTAGCGATTAGCCTGCCTTGAATTCTGTTCCCAACCCCTCAAGCCGC  
TGATTAAACAACCGCGTGCTAACACTTCAGGGGTGATTTATTAGCCGCTTCACCTCA  
CAACTTCTTCTACCCCTAAACCCTGGGGGCCACAAGTGGGCAGTTCTATTACCTCG  
TTAATGTTTTCTTTTCTATCAACATGCTAGGACTCCTTCCATACACCTTCACACCAA  
CAACCAACTCTCCCTTAACATGGGCCTCGCAGTACCCCTTTGATTGGCAACTGTCA  
TTATGGGATACGAAATCAACCAACGCATGCCCTAGGCCACCTTCTTCCAGAAGGCAC  
CCCCACTGCCCTCATCCCTGTACTTATTATCATTGAAACAATTAGCCTATTCAATCGA  
CCCTTAGCTCTCGGTGTCCGACTAACAGCAAATCTCACAGCAGGCCACCTCCTTATT  
CAACTCATTGCAACAGCTGCCTTCGTCCTTCTTCCCCTCATACCTGTTGTGCTATCT  
TAACAACGGTGGTCCTCTTCTCCTCACTCTACTAGAAGTAGCCGTTGCCATGATTC

AAGCTTATGTCTTTGTTCTACTCCTAAGCCTATACCTACAAGAGAACGTTTAATGCCT  
CAACTGAACCCCGCACCCTGATTTGCAATTTTAGTTTTCTCTTGAATAATCTTTTTAA  
CTGTTATTCCCCCAAAGTTTTAGCACACACCTATCCCAATGAACCCACCTCCCAA  
GCACACAAAAACAAAACAGAGCCCTGAAACTGACCATGATACTAAGTGGCAATCAC  
ACGTTGATTTTTCTCGACCAATCACAAAGACATCGGCACCCTCTATCTCGTATTTGGT  
GCCTGAGCCGGAATAGTGGGGACAGGCCTAAGTCTGCTTATTCGGGCAGAACTAAG  
CCAACCCGGGGCTCTCCTGGGAGACGACCAAATTTATAATGTGATCGTCACCGCACA  
CGCCTTTGTAATAATCTTTTTTATAGTAATACCCATTATGATTGGGGGGTTCGGAAAC  
TGGCTTATTCCACTAATAATTGGGGCCCCAGACATGGCGTTCCCTCGAATGAATAAT  
ATGAGTTTCTGACTTCTTCCCCCTCCTTTCTCCTCCTCTTAGCCTCTTCAGGTGTTGA  
AGCCGGAGCAGGTACCGGATGAACCGTGTACCCCCCACTAGCTGGCAATTTAGCCC  
ACGCCGGGGCATCCGTAGACCTGACAATCTTCTCACTTCACCTTGCAGGAATTCAT  
CAATTCTGGGGGCAATTAACCTTTATTACTACCATCATTAACATGAAACCCACAACAG  
TCACTATGTACCAAATCCCGTTATTTGTTTGAGCCGTTCTTATTACAGCCGTACTTCT  
TCTTCTGTCCCTGCCCGTTTTAGCCGCAGGGATTACAATGCTACTAACAGACCGCAA  
CCTTAACACGACCTTCTTTGACCCTGCCGGAGGAGGTGACCCCATCTCTACCAACA  
CCTATTCTGATTCTTTGGCCACCCAGAGGTATACATTCTTATCCTCCCAGGCTTCGGA  
ATAATTTCTCACATTGTTGCATACTATGCAGGTAAGAAAGAACCTTTTGGCTACATG  
GGGATAGTCTGAGCTATAATGGCCATTGGACTCCTGGGCTTCATTGTCTGGGCCCAT  
CACATATTTACAGTCGGAATAGACGTAGATACACGAGCCTACTTTACCTCTGCCACA  
ATAATCATTGCGATTCCAACCTGGCGTAAAAGTCTTTAGCTGACTCGCAACCCTCCAT  
GGGGGAAGCATTAAATGAGAAACGCCCTTCTATGAGCCCTCGGCTTTATTTTCCTC  
TTTACAGTAGGCGGTCTCACTGGCATTGTCTTAGCTAACTCCTCTCTCGATATTGTT  
TGCATGACACATACTATGTAGTCGCCCCTTCCACTATGTACTATCTATGGGTGCTGT  
ATTTGCAATCGTTGCCGCCTTCGTCCATTGATTTCCGTTATTTACAGGCTATACCCTT  
CACTCCACATGAACAAAAATCCACTTCGGCCTGATGTTTATTGGGGTCAATCTAACA  
TTCTTCCCTCAACATTTTCTGGGCCTGGCTGGGATACCCCGACGGTACTCAGACTAC  
CCAGACGCATACACCCTTTGAAACACTGTTTCATCAATTGGGTCCCTAATGTCCCTC  
GTTGCTGTAATTTTATTCTTATTCAATTATTTGAGAAGCATTACAGCCAAACGAGAA  
GTCGGAGCAGTAGAACTAACTGCAACTAACATTGAATGACTTTACGGCTGCCCTCCC  
CCCTACCACACATTTGAAGAGCCCGCATTCGTACAAGTTCGTATAAACTAAATGGCA  
CATCCCTCACAACTCGGATTTCAAGACGCAGCTTCACCCTTAATAGAAGAACTACTT  
CACTTCCACGACCACGCCTTAATAATTGTAATTCTCATTAGCACAAATGGTACTTTATA  
TTATTGCGGCTATAGTCACAGCCAACTAACAGATAAACTTGTACTAGACTCTCAAG  
AAATTGAAATTATCTGAACAGTTCTCCCAGCTGTTATTCTTATCCTTATCGCCCTACC  
ATCCATCCGAATTTTGTACTTAATAGACGAAATTAATGACCCCCACCTTACAATCAA  
AGCCATCGGCCACCAATGATACTGAAGCTACGAATACACAGACTACGAAGACCTCG  
GTTTTGACTCATACATAATCCCCACACAAGACCTGACCCCGGACAATTCCGACTAC  
TAGAAGCAGACCACCGAATAGTAATCCCAGTAGAATCTCCAATTCGCGTTTTAATCT  
CGGCTGAAGATGTCTTACATTCCCTGGGCAGTCCCCTCTCTAGGCGTAAAAGTTGACG  
CCGTACCTGGACGATTGAACCAAGCAACCTTTATTGTTAGCCGACCAGGCGTATTTT  
TCGGACAATGTTCTGAAATTTGCGGGGCTAACCATAGTTTTATACCCATTGTTGTAG  
AAGCAGTCCCCCTTGAACACTTTGAGAAGTGGTCTTCACTAATAATTGAAGACGCCT  
ATGGCCCATCAAGCACACCCATAACCACATAGTCGACCCAGCCCATGACCCCTAAC  
AGGGGCTATTGCTGCCCTATTGATAACATCTGGCCTTGCTATCTGATTCCACTTCCAC  
TCCACAACCCTAATAACTATTGGGACAATCCTTCTCACCTTAACAATCTTCCAATGA  
TGACGGGACGTCGTACGAGAAGGCACATTTCAAGGACACCACACTCCCCCGTTCA  
AAAAGGCCTCCGATATGGGATAATTTTATTTATTACCTCAGAAGTCCTATTCTTCTTA

GGCTTCTTCTGAGCCTTTTACCACTCAAGCCTAGCACCTACCCCTGAGCTAGGCGGC  
TTCTGACCACCAGCAGGCATTACTCCCTTAGACCCATTTGAAGTCCCACCTTCTTAAC  
ACAGCAGTCCTGCTCGCCTCTGGCGTAACTGTTACCTGAGCACATCACAGCATTATG  
GAGGGTAAACGAAAACAACTATTCAATCTCTTGCTCTTACAATCTTACTCGGGGGG  
TACTTCACTTTTCCTTCAAGGCCTAGAGTATCACGAAGCCCCCTTACCATTGCAGAC  
GGAGTTTACGGCGCTACATTCTTTGTTGCCACCGGCTTCCACGGATTACACGTCTTA  
ATTGGCACATCATTCTTAGCCGTTTGTCTATTACGCCAGATTCTTCACCATTTCACAT  
CAAACCACCACTTTGGGTTTGAAGCAGCCGCATGATACTGACACTTCGTAGACGTCG  
TCTGACTTTTTCCTCTATATCTCTATTTACTGATGAGGATCTTAATGGCCAGTCTACGT  
AAATCCCACCCTCTTCTAAAAATCGCAAACGATGCTTTAGTCGACCTCCCCGCCCCC  
TCTAATATCTCGGTTTGATGGAACCTTGGGTCTCTTTTAGGACTCTGTTTAATTACCC  
AAATTGCGACCGGCTTATTTCTAGCCATACTACACATCAGACATTGCTACTGCCT  
TCACCTCCGTGGCCACATCTGTGCGAGACGTCAACTACGGCTGACTTATCCGAAGCA  
TTCATGCCAACGGCGCATCATTCTTTTTTCATTTGCCTCTACCTTCATATTGGCCGAGG  
ACTATACTATGGCTCTTACCTCTATAAAGAAACATGAACTGTTGGGGTTATTCTTCTC  
CTTCTCGTAATAATAACAGCCTTCGTTGGATACGTCCTCCCTTGAGGACAAATGTCG  
TTTTGAGGTGCAACCGTTATTACCAACCTTCTATCTGCCGTCCCCTACGTCGGAAC  
ACCCTAGTCCAATGAATCTGAGGGGGTTTTTCTGTAGACAATGCTACCCTCACCCGG  
TTCTTTGCCTTCCACTTTCTCTTCCCCTTCATCATCGCTGCCGCAACATTAATTCATCT  
ACTCTTTCTTCACGAGACTGGCTCAAACAACCCACCGGGCTAAACTCAGACTCCGA  
CAAAGTTCCTTTACCCCCTACTTCACTTACAAAGACCTCTTGGCTTTGCAGTACTTC  
TACTGCATTAGCATCCCTAGCCCTATTTTCCCCAAATCTCTTAGGAGACCCAGATA  
ACTTTACCCCTGCAAATCCGCTTGTTACTCCCCACACATTAAGCCAGAGTGATACT  
TCCTGTTTGCCTATGCTATTCTACGCTCCATTCCAAACAACTTGGAGGAGTACTTGC  
CCTTTTATTCTCCATCTTAGTTCTTATGCTCGTCCCTTTCTTCATACCTCTAAACAAC  
GAAGCCTAATATTCCGTCCCCTAACACAATTCTTGTTTTGGTCTTTAGTAGCAGACGT  
TATGATTCTAACTTGAATTGGAGGGATGCCCGTAGAACACCCCTTCGTCATCATTGG  
ACAAGTAGCGTCTCTCCTCTACTTCTCCCTCTTCCTAGTCCTGATCCCAACAGCAGGT  
TGACTAGAGAATAAAGTCCTTGGATGAAAATATGATTTCAACTCTCATTACTCATAT  
TATCAACCCACTAACCTTTATTGTGCCTGTATTGCTAGCCGTAGCATTCCCTCACCCCTC  
CTTGAACGAAAAGTGCTAGGCTACATACAACTACGAAAAGGGCCAAACATTGTTGG  
GCCTTACGGCCTCCTTCAACCTATTGCTGATGGCGTAAAACCTTTTATTAAAGAACC  
CATTCGACCTTCAACCGCATCACCCGTCCTATTCCCTCGTGGCCCCTATGCTCGCTCTC  
ACACTAGCCCTAACCCCTTGAGCCCCCATACCTTTCCCGTACCCTGTCGTGGACCTTA  
ACCTAGGTATTTTATTTATTCTAGCTCTATCTAGCCTTGCAGTATATTCTATTCTGGG  
CTCCGGCTGAGCATCTAATTCAAATATGCCCTAGTAGGGGGCACTGCGGGCTGTCGC  
ACAAACGATTTCTTACGAAGTTAGCCTTGGACTCATCTTACTAAACATTATCATCTTC  
ACCGGGGGCTTCACACTCCAAACCTTTAACACAGCCCAAGAGGCCATTTGACTGGTA  
GTGCCCGCTTGACCGCTGGCTGCCATATGATATATCTCCACTCTTGCCGAAACAAAC  
CGTGACCCCTTCGACTTAACAGAAGGAGAATCTGAACTTGTCTCGGGCTTCAACGTA  
GAGTACGCAGGGGGACCCCTTCGCCTTGTTCTTCTTAGCCGAATATTCAAATATTCTC  
CTAATAAATACCCTGTCCGCTACACTATTTTTAGGGGCCTCCACATCCCATCTATCC  
CGGAATTAAGTAGTATTAATATTATGACTAAAGCAGCCCTTCTATCAATTGTCTTCCT  
GTGGGTCCGGGCTTCGTACCCGCGATTCCGTTACGACCAACTTATGCACCTCATTTG  
AAAAAACTTTCTTCCACTGACTTTGGCACTAGTTATCTGACACTTGGCGCTCCCTATT  
GCATTGCTGGTCTCCCACCACAGCTATAGATGAACCCCTACATCTTGACCACTCTT  
CTATTTGGTTTGGGCCTTGAACAACACTCACGTTTGCAAGCTCACACTGGCTCCTC  
GCTTGAATAGGACTTGAGATTAATACACTAGCCATTATTCCCCTAATAGCCCAACAC

CACCACCCCCGGGCAGTCGAAGCTACTACTAAATACTTTCTCGCACAAAGCCACAGCA  
GCCGCCACCCTCCTGTTTGAAGCACTACCAACGCTTGACTCACAGGCCAGTGGGAT  
ATTCAACAGATAACACATCCCCCTCCCCACAACAATGATTGTTATTGCCCTCGCGCTA  
AAGGTCGGAAGTGGCACCAATGCACTCTTGACTCCCCGAAGTACTCCAAGGGCTAGA  
CCTGACCACCGGGGCTCATCCTCTCAACCTGACAAAACTTGCACCCTTTGCCCTCTT  
ACTACAGATTCAGACAACAACCCTACGCCTCTAATCATTATTGGCTTACTATCCACT  
CTCGTTGGTGGCTGAGGTGGTCTCAACCAAACCCAGCTGCGCAAGGTCTCGCCTAC  
TCCTCAATTGCCACCTTGGCTGAATAATGCTGATCCTTCAATTTTCACCCCTCCTTG  
CCCTTCTCACCCCTCCTCACGTACTTTCTATGACTTTCTCAGCATTCTTAATTTTAAAG  
TAAACAAAGCGACCACCGTCAATGCCCTCGCCATCTCGTGAACAAAACTCCTGCCC  
TCACAGCCCTAGCACCCCTGGTTTTACTTTCTCTCGGCGGCCTTCCCTCCCTTACCGG  
CTTCATGCCCAAGTGATTCAATCTTCAGGAACTGACTAAACAAGACCTTCCGCACTT  
GCCACCCTCGCCGCTTTAACTGCCCTCTTGAGTCTCTACTTCTACTTGGCGCTCTCGT  
ATGCAATAACCCTCACAATATTCCCCAACAACTAATTGGTGTCACTCCCTGACGAT  
TCTACTCCCCCAATTTACACTTCCCCTCGCCGTCTCCACTGCAGCAACCACCCTTCT  
TCTCCCACTAGCCCCCGCTGCCGTAGCACTACTGGTCACCTATGAGCCTTCTCCTAAC  
CATCATTTTCGATTGCCACCCTCCTCTCGACAGTACTAGCCCTTGTATCCTTTTGATTA  
CCCCAAATTACACCAGACCACGAAAAGCTATCGCCGTACGAGTGCGGCTTTGACCC  
GATAGGATCCGCCCCGGCTGCCTTTTTCACTGCGGTTTTTCCTCATCGCCATCCTCTTT  
CTTCTCTTCGATTTAGAAATTGCTCTCCTCCTCCCTCTTCCATGAGGAGACCAACTAG  
CATCGCCACTACTGACGTTACCTGAGCTACAGCTGTCCTAGCCCTTCTAACCCCTCG  
GCCTCATTTACGAATGAATGCAAGGAGGTCTAGAATGGGCTGAATATGCTAAAAGT  
CCTAATCCCAACACTTATGCTAATCCCAACAGCCTGGTTACTCAAACCCAGCTGACT  
CTGGCCCATGACTTTAATGTATAGCTTTTGCATCTCCTTGGTTAGCCTTTCATGACTA  
AAGAACCTCTCAGAAACCGGCTGATCGTCACTTAGCCTCTTTATAGCTACCGACTCC  
CTATCAACCCCCCTCCTCGTTCTTACATGCTGATTACTCCCACTAATAATTTTGGCAA  
GCCAAAAACACACAGCCTTAGAACCTCTTAGTCGCCAGCGCATGTACATCACACTTC  
TCGCCTCCTCCAGTTTTTTCCTAATCCTAGCATTTAGCGCCACCGAACTGGTGATGTTT  
TACGTAATATTTGAAGCCACCCTCATCCCCACGCTAATCATTATCACCCGCTGAGGA  
AACCAAACAGAACGTCTAAACGCAGGAACCTACTTTCTCTTCTATACATTAGCGGGC  
TCACTCCCTCTTCTCGTTGCTTTACTCCTACTCCAAAACACATCCGGCACCCCTGTCGC  
TGTTAACCCCTTCACTATACGGACCCGCTCGCTCTCGTCTTATGCAGACAAACTATGA  
TGAGCAGGCTGTCTTTTAGCATTCCTGGTTAAAATACCCCTCTACGGGGTCCACCTA  
TGGCTCCCTAAAGCCCATGTTGAAGCCCCAATTGCAGGCTCAATAATCCTTGCAGCG  
GTTCTACTGAAGCTAGGGGGATACGGCATAATCCGCATAATAACAATATTGGAACC  
TCTAACTAAGGAGTTAAGCTACCCCTTCATTGTCTTTGCACTTTGAGGGGTAAATTATA  
ACTGGGTCAATTTGTCTACGCCAGACAGACCTTAAGTCCCTAATTGCCTACTCCTCA  
GTCAGCCACATAGGCCTAGTGGCTGGAGGAATTCTTATCCAATCACCCCTGGGGCTTA  
ACAGGGGGCTCTTACCCTCATAATTGCACACGGGCTTACTTCATCAGCCCTCTTCTGCT  
TAGCAAACACAACTATGAACGAACCCACAGTCGAACGATAGTCCTGGCGCGAGGA  
CTTCAAGTAGCCCTACCACTAATAGCCACTTGATGATTTATTTCTAGCTTGGCCAACC  
TAGCTCTGCCACCACTACCCAACCTCATGGGGGAGCTGATAATTATCACTTCTTTATT  
CAACTGGTCCTGATGAACTCTGGCATTAAACCGGTGCAGGCACTCTAATCACAGCTGG  
TACTCCCTTTACATATTCTTAATAACTCAGCGGGGGCCCTCTCCCAACACATGTCATT  
GCACTTGAGCCATCTCACACCCGAGAACACCTTCTTATTGCCTTCACCTCATCCCCTT  
AATTCTACTCGTACTTAAGCCCGAGCTGATCTGAGGCTGAACTGCCTATGACCCCCA  
CACACTTTGCCTTCTCCTCAGCCTTTCTTCTGGGTTTAAACAGGCCTGGCATTCCACCG  
GTTTCACCTCCTTTCCGCCCTATTGTGCCTTGAAGGAATAATACTATCCCTATTTATT

GCTCTCTCCCTATGAACGCTCCAACCTTGACTCAACCAACTTTTCAGCATCTCCAATAC  
TTCTGCTTGCAATTTTCAGCCTGCGAAGCAAGCGCCGGCCTCGCCCTATTAGTAGCCA  
CTGCTCGAACCCACGGGACCGACCGATTACAAAGCCTAAATCTTCTCCAATGCTAAA  
TGTACCCACCTCCCTAATGATTTTCATCGAGCCTGATCACAATCTTTGCGTTACTAGC  
CTATCCTTTAATCACCACGATCCGCCCTACACCTCGGGACCCTCAATGGGCTACCAC  
CCATGTCAAAACAGCTGTAAAAATAGCTTTCTTTGTTAGTCTGCTGCCTCTGACCCTA  
TTTCTTAATGAGGGCGCAGAAACAATCGTTACTAACTGAACCTGAATAAATACCAAC  
TCCTTCAATGTCAGCATTAGCTTGAAATTTGATTTCTACTCAATTATTTTTACACCCA  
TTGCCCTCTACGTAACCTTGATCCATCCTGGAGTTCGCATCATGGTATATGCACGCAG  
ACCCACACATGAACCGCTTCTTTAAGTACCTCCTGACGTTTCTGATTGCCATAATCGT  
CCTAGTAACTGCAAACAATATGTTTCAACTATTTATCGGTTGAGAGGGCGTGCGGAT  
CATATCGTTCTTACTTATTGGATGGTGGTTCGGACGGGCGGATGCTAACACTGCAGC  
GCTTCAAGCAGTACTTTACAACCGAGTAGGGGACATCGGGCTTATCTTCGCCATGGC  
TTGAATAGCAGCAAACCTAAACTCCTGGGAGATGCAACAAATCTTTGCAACCACCA  
AAGACATAGACTTAACCTACCCTCTTCTCGGACTCATCATTGCAGCAACTGGCAAAT  
CGGCTCAATTCGGACTTCACCCTTGACTACCCTCCGCTATGGAGGGTCCCACACCGG  
TCTCTGCCCTACTTCATTCTAGCACTATGGTCGTTGCCGGCATTCTTCTGCTAGTACG  
AATAAGCCCGCTACTGGAAAACAACCAAACCGCCCTCACAACTGCCTATGCCTCG  
GAGCTCTTACAACACTATTCACTGCAACCTGTGCCCTCACGCAAAATGATATTA  
AAATCGTCGCATTCTCTACATCCAGCCAGCTTGGGCTTATAATGGTAACCATTGGTC  
TAAACCAGCCACAACCTAGCATTTCTTCACATCTGTACACATGCCTTCTTCAAGGCCA  
TACTATTTTTATGCTCCGGATCTATTATCCACAGCCTAAATGATGAACAAGATATCC  
GGAAAATAGGGGGCATAACACACCTTGACCTTTCACATCCTCTTGCCCTAACTATTG  
GCAGCCTCGCCCTCACAGGAACCCCTTCTTGGCTGGCTTCTTCTCTAAAGATGCCA  
TCATCGAAGCATTAAACACATCCACCTAAACGCCTGAGCCCTAACCTTAACCCTCC  
TAGCCACCTCTTTCACAGCAATCTACAGCTTTCGAGTAGTATTTTTTGTACCCATGGG  
CCACCCCGATTAGTCCCTCTCTCCGATCAACGAAAACAACCCAGCAGTGATTAAC  
CCACTTAAGCGACTAGCATGGGGGAGTATCGTTGCAGGCTTACTAATTACCTCTAAT  
ATTACACCCTTGAAAACCCCTGTCATATCTATACCTCCCCTCCTTAACTAGCTGCTC  
TTGCAGTCACAATCATCGGCCTTCTTGTTGCTATAGAGCTCGCCATGTTAACCAACA  
AACAATATGAGCCAATACCCAACACGACATACACCCTTCTCTGCCTTATTAGGCTT  
CTTCCCCGGGGTTATACACCGCCTAACCCCTGTATTGCTCTTCTTCCTAGGCCAAAAC  
ATTGCTAACCAAACAGTAGATCAGACATGATTAGAAAAAACGGGCCCCAAAGCCAT  
TGAAGCCGCTAACCGACCTCTCGTCTCCTCTACAAGTAACATTCAACGGGGGGTAAT  
CAAAACATATCTCCCCTCTTCCTCCTTACACTAGCCCTTATAATCCCCCTATTTCATCA  
CCTAATGACTTTTCGCTATATATTTAGTTTTATTTTCTCTTGTGTTGGGGTTAGTTGCAG  
TTGCTTCTAATCCGTCCCCTTATTTTGCTGCTTTGGGTTTGGTTGTGGTAGCTGGCAT  
GGGGTGTGGTATATTAGTCGGGCATGGAGGGCCCTTTTTGTCACTAGTCTTGTCTTA  
ATTTACTTAGGCGGGATGTTAGTTGTATTTGCATATTCAGCAGCGTTAGCTGCTGAG  
CCGTACCCAGAGAGCTGGGGTAGTTGGTCGGTAATGGTATACGGTTGTCTACACAG  
GGGGAGTATTATAGTTTCCGGGCTGTTTTGAGGGGGGTGGTATGAATCTTCTTGGGT  
TCTAGCAGATGAGTTAGGGGAGTTTTCCGTGTTTCGAGGTGATATTGGAGGGGTAGC  
CTTAATATACTCTTCTGGGGGGTGGTTGTTAATTACTAGTGCATGGGTATTGCTTTTA  
ACTTTATTTGTAGTCCTTGAGTTAACCGGGGTATGAGTCGAGGGGGCGTTGCGACGGT  
TT"/>

<sequence id="seq\_Hippoglossus\_hippoglossus\_AM749123" spec="Sequence"  
taxon="Hippoglossus\_hippoglossus\_AM749123" totalcount="4"  
value="ATGATACTAAGCTTCTTTGACCAATTTATATCCCCTTCATACCTCGGCATTCC

ACTAATTGCACTAGCGATTAGCCTGCCTTGAGTTCTGTTCCCAACCCCTCAAGCCGC  
TGATTAAACAACCGCGTGCTAACACTTCAAGGGTGATTTATTAGCCGCTTCACCTCA  
CAACTTCTTCTACCCCTAAACCCTGGGGGCCACAAGTGGGCAGTTCTATTACCTCG  
TTAATGTTTTCTTTTCTATCAACATGCTAGGACTCCTTCCATACACCTTCACACCAA  
CAACCCAACTCTCCCTTAACATGGGCCTCGCAGTACCCCTTTGATTGGCAACTGTCA  
TTATGGGATACGAAATCAACCAACGCATGCCCTAGGCCACCTTCTTCCAGAAGGCAC  
CCCCACTGCCCTCATCCCTGTACTTATTATCATTGAAACAATTAGCCTATTTCATTGCA  
CCCTTAGCTCTCGGTGTCCGACTAACAGCAAATCTCACAGCAGGCCACCTCCTCATT  
CAACTCATTGCAACGGCTGCCTTCGTCCTTCTTCCCCTCATACCTGTTGTGCTATCT  
TAACAACGGTGGTCCTCTTCTCCTCACTCTACTAGAAGTAGCCGTTGCCATGATTC  
AAGCTTATGTCTTTGTTCTACTCCTAAGCCTATATCTACAAGAGAACGTTTAATGCCT  
CAACTGAACCCCGCACCCCTGATTTGCAATTTTAGTTTTCTCTTGAATAATCTTTTTAA  
CTGTTATTCCCCCAAAGTTTTAGCACACACCTATCCCAATGAACCCACCTCCCAAA  
GCACACAAAAACAAAACAGAGCCCTGAAACTGACCATGATACTAAGTGGCAATCAC  
ACGTTGATTTTTCTCGACCAATCACAAAGACATCGGCACCCTCTATCTCGTATTTGGT  
GCCTGAGCCGGAATAGTGGGGACAGGCCTAAGTCTGCTTATTCGGGCAGAACTAAG  
CCAACCCGGGGCTCTCCTGGGAGACGACCAAATTTATAATGTGATCGTCACCGCACA  
CGCCTTTGTAATAATCTTTTTTATAGTAATACCCATTATGATTGGGGGGTTTCGGAAAC  
TGGCTTATTCCACTAATAATTGGGGCCCCAGACATGGCGTTCCCTCGAATGAATAAT  
ATGAGTTTCTGACTTCTTCCCCCCTCCTTTCTCCTCCTCTTAGCCTCTTCAGGTGTTGA  
AGCCGGAGCAGGTACCGGATGAACCGTGTACCCCCCACTAGCTGGCAATTTAGCCC  
ACGCCGGGGCATCCGTAGACCTGACAATCTTCTCACTTCACCTTGCAGGAATTTTCAT  
CAATTCTGGGGGCAATTAACCTTTATTACTACCATCATTAACATGAAACCCACAACAG  
TCACTATGTACCAAATCCCGTTATTTGTTTGAGCCGTTCTTATTACAGCCGTACTTCT  
TCTTCTGTCCCTGCCCGTTTTAGCCGCAGGGATTACAATGCTACTAACAGACCGCAA  
CCTTAACACGACCTTCTTTGACCCTGCCGGAGGAGGTGACCCCATCTCTACCAACA  
CCTATTCTGATTCTTTGGCCACCCAGAGGTATACATTCTTATTCTCCAGGCTTCGGA  
ATAATTTCTCACATTGTTGCATACTATGCAGGTAAGAAAGAACCTTTTGGCTACATG  
GGGATAGTCTGAGCTATAATAGCCATTGGACTCCTGGGCTTCATTGTCTGGGCCCCAT  
CACATGTTTACAGTCGGAATAGACGTAGATACACGAGCCTACTTTACCTCTGCCACA  
ATAATCATTGCGATTCCAACCTGGCGTAAAAGTCTTTAGCTGACTCGCAACCCTCCAT  
GGGGGAAGCATTAAATGAGAAACGCCCTTCTATGAGCCCTCGGCTTTATTTTCCTC  
TTTACAGTAGGCGGTCTCACTGGCATTGTCTTAGCTAACTCCTCTCTCGATATTGTTT  
TGCATGACACATACTATGTAGTCGCCCCACTTCCACTATGTACTATCTATGGGTGCTGT  
ATTTGCAATCGTTGCCGCCTTCGTCCATTGATTTCCGTTATTTACAGGCTATACCCTT  
CACTCCACATGAACAAAAATCCACTTCGGCCTGATGTTTATTGGGGTCAATCTAACA  
TTCTTCCCTCAACATTTTCTGGGCCTGGCTGGGATACCCCGACGGTACTCAGACTAC  
CCAGACGCATACACCCCTTTGAAACACTGTTTCATCAATTGGGTCCCTAATGTCCCTC  
GTTGCTGTAATTTTATTCTTATTTCATTATTTGAGAAGCATTACAGCCAAACGAGAA  
GTCGGAGCAGTAGAACTAACTGCAACTAACATTGAATGACTTTACGGCTGCCCTCCC  
CCCTACCACACATTTGAAGAGCCCGCATTCGTACAAGTTCGTATAAACTAAATGGCA  
CATCCCTCACAACTCGGATTTCAAGACGCAGCTTCACCCTTAATAGAAGAACTACTT  
CACTTCCACGACCACGCCTTAATAATTGTAATTCTCATTAGCACAAATGGTACTTTATA  
TTATTGCGGCTATAGTCACAGCCAACTAACAGATAAACTTGTACTAGACTCTCAAG  
AAATTGAAATTATCTGAACAGTTCTCCCAGCTGTTATTCTTATCCTTATCGCCCTACC  
ATCCATCCGAATTTTGTACTTAATAGACGAAATTAATGACCCCCACCTTACAATCAA  
AGCCATCGGCCACCAATGATACTGAAGCTACGAATACACAGACTACGAAGACCTCG  
GTTTTGACTCATACATAATCCCCACACAAGACCTGACCCCTGGACAATTCCGACTAC

TAGAAGCAGACCACCGAATAGTAATCCCAGTAGAATCTCCAATTCGCGTTTTAATCT  
CGGCTGAAGATGTCTTACATTCCCTGGGCAGTCCCCTCTCTAGGCGTAAAAGTTGACG  
CCGTACCTGGACGATTGAACCAAGCAACCTTTATTGTTAGCCGACCAGGCGTATTTT  
TCGGACAATGTTCTGAAATTTGCGGGGCTAACCATAGTTTTATACCCATTGTTGTAG  
AAGCAGTCCCCCTTGAACACTTTGAGAAGTGGTCTTCACTAATAATTGAAGACGCCT  
ATGGCCCATCAAGCACACCCATACCACATAGTCGACCCCAGCCCATGACCCCTAAC  
AGGGGCTATTGCTGCCCTATTGATAACATCTGGCCTTGCTATCTGATTCCACTTCCAC  
TCCACAACCCTAATAACTATTGGGACAATCCTTCTCACCTTAACAATCTTCCAATGA  
TGACGGGACGTCGTACGAGAAGGCACATTTCAAGGACACCACACTCCCCCGTTCA  
AAAAGGCCTCCGATATGGGATAATTTTATTTATTACCTCAGAAGTCCTATTCTTCTTA  
GGCTTCTTCTGAGCCTTTTACCCTCAAGCCTAGCACCTACCCCTGAGCTAGGCGGC  
TTCTGACCACCAGCAGGCATTACTCCCTTAGACCCATTTGAAGTCCCACTTCTTAAC  
ACAGCAGTCCTGCTCGCCTCTGGCGTAACTGTTACCTGAGCACATCACAGCATTATG  
GAGGGTAAACGAAAACAACTATTCAATCTCTTGCTCTTACAATCTTACTCGGGGGG  
TACTTCACTTTTCTTCAAGGCCTAGAGTATCACGAAGCCCCCTTCACCATTGCAGAC  
GGAGTTTACGGCGCTACATTCTTTGTTGCCACCGGCTTCCACGGATTACACGTCTTA  
ATTGGCACATCATTCTTAGCCGTTTGTCTATTACGCCAGATTCTTCACCATTTACAT  
CAAACCACCACTTTGGGTTTGAAGCAGCCGCATGATACTGACACTTCGTAGACGTCG  
TCTGACTTTTCTCTATATCTCTATTTACTGATGAGGATCTTAATGGCCAGTCTACGT  
AAATCCCACCTCTTCTAAAAATCGCAAACGATGCTTTAGTCGACCTCCCCGCCCCC  
TCTAATATCTCGGTTTGATGGAACCTTGGGTCTCTTTTAGGACTATGTTTAATTACCC  
AAATTGCGACCGGCTTATTTCTAGCCATACACTACACATCAGACATTGCTACTGCCT  
TCACCTCCGTGGCCACATCTGTGAGACGTCAACTACGGCTGACTTATCCGAAGCA  
TTCATGCCAACGGCGCATCATTCTTTTTCATTTGCCTCTACCTTCATATTGGCCGAGG  
ACTATACTATGGCTCTTACCTCTATAAAGAAACATGAACTGTTGGGGTTATTCTTCTC  
CTTCTCGTAATAATAACAGCCTTCGTTGGATACGTCCTCCCTTGAGGACAAATGTGCG  
TTTTGAGGTGCAACCGTTATTACCAACCTTCTATCTGCCGTCCCCTACGTCGGAAAC  
ACCCTGGTCCAATGGATCTGAGGGGGTTTTTCTGTAGACAATGCTACCCTCACCCGG  
TTCTTTGCCTTCCACTTTCTCTTCCCCTTCATCATCGCTGCCGCAACATTAATTCATCT  
ACTCTTTCTTCACGAGACTGGCTCAAACAACCCACCCGACTAAACTCAGACTCCGA  
CAAAGTTCCCTTTCACCCCTACTTCACTTACAAAGACCTCTTGGCTTTGCAGTACTTC  
TACTGCATTAGCATCCCTAGCCCTATTTTCCCCAAATCTCTTAGGAGACCCAGATA  
ACTTTACCCCTGCAAATCCGCTTGTTACTCCCCACACATTAAGCCAGAGTGATACT  
TCCTGTTTGCCTATGCTATTCTACGCTCCATTCCAAACAACTTGGAGGAGTACTTGC  
CCTTTTATTCTCCATCTTAGTTCTTATGCTCGTCCCTTTCTTTCATACCTCTAAACAAC  
GAAGCCTAATATTCCGTCCCCTAACACAATTCTTGTTTTGGTCTTTAGTAGCAGACGT  
TATGATTCTAACTTGAATTGGAGGGATGCCCCGTAGAGCACCCCTTCGTCATCATTGG  
ACAAGTAGCGTCTCTCCTTTACTTCTCCCTCTTCCTAGTCCTGATCCCAACAGCAGGT  
TGACTAGAGAATAAAGTCCTTGGATGAAAATATGATTTCAACTCTCATTACTCATAT  
TATCAACCCACTAACCTTTATTGTGCCTGTATTGCTAGCCGTAGCATTCCCTCACCCCTC  
CTTGAACGAAAAGTGCTAGGCTACATACAACCTACGAAAAGGGCCAAACATTGTTGG  
GCCTTACGGCCTCCTTCAACCTATTGCTGATGGCGTAAAACCTTTTATTAAAGAACC  
CATTCGACCTTCAACCGCATCACCCGTCTTATTCCTCGTGGCCCCCTATGCTCGCTCTC  
ACACTAGCCCTAACCTTTGAGCCCCCATACCTTTCCCGTACCCTGTCGTGGACCTTA  
ACCTAGGTATTTTATTTATTCTAGCTCTATCTAGCCTTGCAGTGTATTCTATTCTGGG  
CTCCGGCTGAGCATCTAATTCAAATATGCCCTAGTAGGGGCACTGCGGGCTGTCGC  
ACAAACAATTTCTTACGAAGTTAGCCTTGGACTCATCTTACTAAACATTATCATCTTC  
ACCGGGGGCTTCACACTCCAAACCTTTAACACAGCCCAAGAGGCCATTTGACTGGTA

GTGCCCCGCTTGACCGCTGGCTGCCATATGATATATCTCCACTCTTGCCGAAACAAAC  
CGTGACCCCTTCGACTTAACAGAAGGGGAATCTGAACCTTGCTCGGGCTTCAACGTA  
GAGTACGCAGGGGGGACCCTTCGCCTTGTTCTTCTTAGCCGAATATTCAAATATTCTC  
CTAATAAATACCCTGTCCGCTACACTATTTTTAGGGGCCTCCCACATCCCATCTATCC  
CGGAATTAAGTAGTATCAATATTATGACTAAAGCAGCCCTTCTATCAATTGTCTTCCT  
GTGGGTCCGAGCTTCGTACCCGCGATTCCGTTACGACCAACTTATGCACCTCATTG  
AAAAAACTTTCTTCCACTGACTTTGGCACTAGTTATCTGACACTTGGCGCTCCCTATT  
GCATTGCTGGTCTCCCACCACAACACTATAGATGAACCCCTACATCTTGACCACTCTT  
CTATTTGGTTTGGGCCTTGGAACAACACTCACGTTTGCAAGCTCACACTGGCTCCTC  
GCTTGAATAGGACTTGAGATTAATACACTAGCCATTATTCCCCTAATAGCCCAACAC  
CACCACCCCGGGCAGTCGAAGCTACTACTAAATACTTTCTCGCACAAGCCACAGCA  
GCCGCCACCCTCCTGTTTGCAAGCACTACCAACGCTTGACTCACAGGCCAATGGGAT  
ATTCAACAGATAACACATCCCCCTCCCCACAACAATGATTGTTATTGCCCTCGCGCTA  
AAAGTCGGACTGGCACCAATGCACTCTTGACTCCCCGAAGTACTCCAAGGGCTAGA  
CCTGACCACCGGGCTCATCCTCTCGACCTGACAAAACTTGACCCCTTTGCCCTCTT  
ACTACAAATTCAAACAACAACCCTACCCCTCTAATCATTATTGGCTTACTATCCACT  
CTCGTTGGTGGCTGAGGTGGTCTCAACCAAACCCAGCTGCGCAAGGTCTCGCCTAC  
TCCTCAATTGCCACCTTGCTGAATAATGCTGATCCTTCAATTTTCACCCCTCCTTG  
CCCTTCTCACCCCTCCTCACGTACTTTCTATGACTTTCTCAGCATTCTTAATTTTTAAAG  
TAAACAAAGCGACCACCGTCAATGCCCTCGCCATCTCGTGAACAAAACTCCTGCCC  
TCACAGCCCTAGCACCCCTGGTTTTACTTTCTCTCGGCGGCCTTCCCTCCCCTTACCGG  
CTTCATGCCCAAGTGATTCATTCTTCAGGAAGTACTAAACAAGACCTTCCGCACCTT  
GCCACCCTCGCCGCTTTAACTGCCCTCTTGAGTCTCTACTTCTACTTGCGCCTCTCGT  
ATGCAATAACCCTCACAATATTCCCCAACAAACCTAATTGGTGTCACTCCCTGACGAT  
TCTACTCCCCCAATTTACACTTCCCCTCGCCGTCTCCACTGCAGCAACCACCCTTCT  
TCTCCCACTAGCCCCCGCTGCCGTAGCACTACTGGTCACCTATGAGCCTTCTCCTAAC  
CATCATTTTCGATTGCCACCCTCCTCTCGACAGTACTAGCCCTTGATCCTTTTGATTA  
CCCCAAATTACACCAGACCACGAAAAGCTATCGCCGTACGAGTGCGGCTTTGACCC  
GATAGGATCCGCCCCGGCTGCCTTTTTCACTGCGGTTTTCTCCTCATCGCCATCCTCTTT  
CTTCTCTTCGATTTAGAAATTGCTCTCCTCCTCCCTCTTCCATGAGGAGACCAACTAG  
CATCGCCACTACTGACGTTACCTGAGCTACAGCTGTCCTAGCCCTTCTAACCCTCG  
GCCTCATTTACGAATGAATGCAAGGAGGTCTAGAATGGGCTGAATATGCTAAAAGT  
CCTAATCCCAACACTTATGCTAATCCCAACAGCCTGGTTACTCAAACCCAGCTGACT  
CTGGCCCATGACTTTAATGTATAGCTTTTGTCATCTCCTTGGTAGCCTTTCATGACTA  
AAGAACCTCTCAGAAACCGGCTGATCGTCACTTAGCCTCTTTATAGCTACCGACTCC  
CTATCAACCCCCCTCCTCGTTCTTACATGCTGATTACTCCCCTAATAATTTTGGCAA  
GCCAAAAACACACAGCCTTAGAACCTCTTAGTCGCCAGCGCATGTACATCACACTTC  
TCGCCTCCTCCAGTTTTTCTAATCCTAGCATTTAGCGCCACCGAACTGGTGATGTTT  
TACGTAATATTTGAAGCCACCCTCATCCCCACGCTAATCATTATCACCCGCTGAGGA  
AACCAAACAGAACGTCTAAACGCAGGAACCTACTTTCTCTTCTATACATTAGCGGGC  
TCACTCCCTCTTCTCGTTGCTTTACTCCTACTCCAAAACACATCCGGCACCCCTGTCGC  
TGTTAACCTTCACTATACGGACCCGCTCGCTCTCGTCTTATGCAGACAACTATGA  
TGAGCAGGCTGTCTTTTAGCATTCTTGTTAAAATACCCCTCTACGGGGTCCACCTA  
TGGCTCCCTAAAGCCCATGTTGAAGCCCCAATTGCAGGCTCAATAATCCTTGACGCG  
GTTCTACTGAAGCTAGGGGGATACGGCATAATCCGCATAATAACAATATTGGAACC  
TCTAACTAAGGAGTTAAGCTACCCCTTCATTGTCTTTGCACTTTGAGGGGTAAATTATA  
ACTGGGTCAATTTGTCTACGCCAGACAGACCTTAAGTCCCTAATTGCCTACTCCTCA  
GTCAGCCACATAGGCCTAGTGGCTGGAGGAATTCTTATCCAATCACCCCTGGGGCTTA



ACAGGGGCTCTTACCCTCATAATTGCACACGGGCTTACTTCATCAGCCCTCTTCTGCT  
TAGCAAACACAAACTATGAACGAACCCACAGTCGAACGATAGTCCTGGCGCGAGGA  
CTTCAAGTAGCCCTACCACTAATAGCCACTTGATGATTTATTTCTAGCTTGGCCAACC  
TAGCTCTGCCACCACTACCCAACCTCATGGGGGAGCTGATAATTATCACTTCTTTATT  
CAACTGGTCCTGATGAACTCTGGCATTAAACCGGTGCAGGCACTCTAATCACAGCTGG  
TACTCCCTTTACATATTCTTAATAACTCAGCGGGGCCCTCTCCCAACACATGTCATT  
GCACTTGAGCCATCTCACACCCGAGAACACCTTCTTATTGCCTTCACCTCATCCCCTT  
AATTCTACTCGTACTTAAGCCCGAGCTGATCTGAGGCTGAACTGCCTATGACCCCCA  
CACACTTTGCCTTCTCCTCAGCCTTTCTTCTGGGTTTAAACAGGCCTGGCATTCCACCA  
GTTTCACCTCCTTTCCGCCCTATTGTGCCTTGAAGGAATAATACTATCCCTATTTATT  
GCTCTCTCCCTATGAACGCTCCAACCTTGACTCAACCAACTTTTCAGCATCTCCAATAC  
TTCTGCTTGCATTTTCAGCCTGCGAAGCAAGCGCCGGCCTCGCCCTATTAGTAGCCA  
CTGCTCGAACCCACGGGACCGACCGATTACAAAGCCTAAATCTTCTCCAATGCTAAA  
TGTACCCACCTCCCTAATGATTTTCATCGAGCCTGATCACAATCTTTGCGTTACTAGC  
CTATCCTTTAATCACCACGATCCGCCCTGCACCTCGGGACCCTCAATGGGCTACCAC  
CCATGTCAAAACAGCTGTAAAAATAGCTTTCTTTGTTAGTCTGCTGCCTCTGACCCTA  
TTTCTTAATGAGGGCGCAGAAACAATCGTTACTAACTGAACCTGAATAAATACCAAC  
TCCTTCAATGTCAGCATTAGCTTGAAATTTGATTTCTACTCAATTATTTTTACACCCA  
TTGCCCTCTACGTAACCTTGATCCATCCTGGAGTTCGCATCATGGTATATGCACGCAG  
ACCCACACATGAACCGCTTCTTTAAATACCTCCTGACGTTTCTGATTGCCATAATCGT  
CCTAGTAACTGCAAACAATATGTTTCACTATTTATCGGTTGAGAGGGCGTGGGGAT  
CATATCGTTCTTACTTATTGGATGGTGGTTCGGACGGGCGGATGCTAACACTGCAGC  
GCTTCAAGCAGTACTTTACAACCGAGTAGGGGACATCGGGCTTATCTTCGCCATGGC  
TTGAATAGCAGCAAACCTAACTCCTGGGAGATGCAACAAATCTTTGCAACCACCA  
AAGACATAGACTTAACCTACCCTCTTCTCGGGCTCATCATTGCAGCAACTGGCAAAT  
CGGCTCAATTCGGACTTCACCCTTGACTACCCTCCGCTATGGAGGGTCCCACACCGG  
TCTCTGCCCTACTTCATTCTAGCACTATGGTCGTTGCCGGCATTTTTCTGCTAGTACG  
AATAAGCCCGCTACTGGAAAACAACCAAACCGCCCTCACAACCTGCCTATGCCTCG  
GAGCTCTTACAACACTATTCCTGCAACCTGTGCCCTCACGCAAAATGATATTA  
AAATCGTCGCATTCTCTACATCCAGCCAGCTTGGGCTTATAATGGTAACCATTTGGTC  
TAAACCAGCCACAACCTAGCGTTTCTTCACATCTGTACACATGCCTTCTTCAAGGCCA  
TACTATTTTTATGCTCCGGATCTATTATCCACAGCCTAAATGATGAACAAGATATCC  
GGAAAATAGGGGGCATAACACCACCTTGACCTTTCACATCCTCTTGCCTAACTATTG  
GCAGCCTCGCCCTCACAGGAACCCCTTCTTGGCTGGCTTCTTCTCTAAAGATGCCA  
TCATCGAAGCATTGAACACATCCACCTAAACGCCTGAGCCCTAACCTTAACCTCC  
TAGCCACCTCTTTCACAGCAATCTACAGCTTTCGAGTAGTATTTTTTGTACCCATGGG  
CCACCCCCGATTTAGTCCCTCTCTCCGATCAACGAAAACAACCCAGCAGTGATTAAC  
CCACTTAAGCGACTAGCATGGGGGAGTATCGTTGCAGGCTTACTAATTACCTCTAAT  
ATTACACCCTTGAAAACCCCTGTCATATCTATACTCCCTCCTTAACTAGCTGCTC  
TTGCAGTCACAATCATCGGCCTTCTTGTTGCTATAGAGCTCGCCATGTAAACCAACA  
AACAAATATGAGCCAATACCCAACACGACATACACCACTTCTCTGCCTTATTAGGCTT  
CTTCCCCGGGGTTATACACCGCCTAACCCCTGTATTGCTCTTCTTCTTAGGCCAAAAC  
ATTGCTAACCAAACAGTAGATCAGACATGACTAGAAAAAACGGGCCCCAAAGCCAT  
TGAAGCCGCTAACCGACCTCTCGTCTCCTCTACAAGTAACATTCAACGGGGGGTAAT  
CAAAACATATCTCCCCTCTTCCTCCTTACACTAGCCCTTATAATCCCCCTATTCATCA  
CCTAATGACTTTTCGCTATATATTTAGTTTTATTTTCTTGTGTTGGGGTTAGTTGCAG  
TTGCTTCTAACCCGTCCCCTTATTTTGCTGCTTTGGGTTTGGTTGTGGTAGCTGGCAT  
GGGGTGTGGTATATTAGTCGGGCATGGAGGGCCCTTTTTGTCACTAGTCTTGTTCTTA

ATTTACTTAGGCGGGATGTTAGTTGTATTTGCATATTCAGCAGCGTTAGCTGCTGAG  
CCGTATCCAGAGAGCTGGGGTAGTTGGTCGGTAATGGTATACGGTTGTCTACACAGG  
AGGAGTATTATAGTTTCCGGGCTGTTTTGAGGGGGGTGGTATGAATCTTCTTGGGTT  
CTAGCAGATGAGTTAGGGGAGTTTTCCGTGTTTCGAGGTGATATTGGAGGGGTAGCC  
TTAATACTCTTCTGGGGGGTGGTTGTTAATTACTAGTGCATGGGTATTGCTCTTAA  
CTTTATTTGTAGTCCTTGAGTTAACCGGGGTATGAGTCGAGGGGCGTTGCGACGGTT  
T"/>

<sequence id="seq\_Hippoglossus\_hippoglossus\_AM749124" spec="Sequence"  
taxon="Hippoglossus\_hippoglossus\_AM749124" totalcount="4"  
value="ATGATACTAAGCTTCTTTGACCAATTTATATCCCCTTCATACCTCGGCATTCC  
ACTAATTGCACTAGCGATTAGCCTGCCTTGAATTCTGTTCCCAACCCCTCAAGCCGC  
TGATTAAACAACCGCGTGCTAACACTTCAGGGGTGATTTATTAGCCGCTTCACCTCA  
CAACTTCTTCTACCCCTAAACCCTGGGGGCCACAAGTGGGCAGTTCTATTACCTCG  
TTAATGTTTTCTTTTCTATCAACATGCTAGGACTCCTTCCATACACCTTCACACCAA  
CAACCCAACTCTCCCTTAACATGGGCCTCGCAGTACCCCTTTGATTGGCAACTGTCA  
TTATGGGATACGAAATCAACCAACGCATGCCCTAGGCCACCTTCTTCCAGAAGGCAC  
CCCCACTGCCCTCATCCCTGTACTTATTATCATTGAAACAATTAGCCTATTTCATTGCA  
CCCTTAGCTCTCGGTGTCCGACTAACAGCAAATCTCACAGCAGGCCACCTCCTTATT  
CAACTCATTGCAACAGCTGCCTTCGTCCTTCTTCCCCTCATACCTGTTGTGCTATCT  
TAACAACGGTGGTCCTCTTCCTCCTCACTCTACTAGAAGTAGCCGTTGCCATGATTC  
AAGCTTATGTCTTTGTTCTACTCCTAAGCCTATACCTACAAGAGAACGTTTAATGCCT  
CAACTGAACCCCGCACCTGATTTGCAATTTTAGTTTTCTTGAATAGTCTTTTTTAA  
CTGTTATTCCCCCAAGGTTTTAGCACACACCTATCCCAATGAACCCACCTCCCAA  
GCACACAAAAACAAAACAGAGCCCTGAAACTGACCATGATACTAAGTGGCAATCAC  
ACGTTGATTTTTCTCGACCAATCACAAAGACATCGGCACCCTCTATCTCGTATTTGGT  
GCCTGAGCCGGAATAGTGGGGACAGGCCTAAGTCTGCTTATTCGGGCAGAACTAAG  
CCAATCCGGGGCTCTCCTGGGAGACGACCAAATTTATAATGTGATCGTCACCGCACA  
CGCCTTTGTAATAATCTTTTTTATAGTAATACCCATTATGATTGGGGGGTTTCGGAAAC  
TGGCTTATTCCACTAATAATTGGGGCCCCAGACATGGCGTTCCCTCGAATGAATAAT  
ATGAGTTTCTGACTTCTTCCCCCCTCCTTTCTCCTCCTCTTAGCCTCTTCAGGTGTTGA  
AGCCGGAGCAGGTACCGGATGAACCGTGTACCCCCCACTAGCTGGCAATTTAGCCC  
ACGCCGGGGCATCCGTAGACCTGACAATCTTCTCACTTCACCTTGCAGGAATTTCTT  
CAATTCTGGGGGCAATTAACCTTTATTACTACCATCATTAACATGAAACCCACAACAG  
TCACTATGTACCAAATCCCGTTATTTGTTTGAGCCGTTCTTATTACAGCCGTACTTCT  
TCTTCTGTCCCTGCCCCGTTTTAGCCGCAGGGATTACAATGCTACTAACAGACCGCAA  
CCTTAACACGACCTTCTTTGACCCTGCCGGAGGAGGTGACCCCATTTCTTACCAACA  
CCTATTCTGATTCTTTGGTCACCCAGAGGTATACATTCTTATCCTCCCAGGCTTCGGA  
ATAATTTCTCACATTGTTGCATACTATGCAGGTAAGAAAGAACCTTTTGGCTACATG  
GGGATAGTCTGAGCTATAATGGCCATTGGACTCCTGGGCTTCATTGTCTGGGCCCCAT  
CACATATTTACAGTCGGAATAGACGTAGATACACGAGCCTACTTTACCTCTGCCACA  
ATAATCATTGCAATTCCAACCTGGCGTAAAAGTCTTTAGCTGACTCGCAACCCTCCAT  
GGGGGAAGCATTAATGAGAAACGCCCTTCTATGAGCCCTCGGCTTTATTTTCCTC  
TTTACAGTAGGCGGTCTCACTGGCATTGTCTTAGCTAACTCCTCTCTCGATATTGTTT  
TGCATGACACATACTATGTAGTCGCCCCACTTCCACTATGTACTATCTATGGGTGCTGT  
ATTTGCAATCGTTGCCGCCTTCGTCCATTGATTTCCGTTATTTACAGGCTATACCCTT  
CACTCCACATGAACAAAAATCCACTTCGGCCTGATGTTTATTGGGGTCAATCTAACA  
TTCTTCCCTCAACATTTTCTGGGCCTGGCTGGGATACCCCGACGGTACTCAGACTAC  
CCAGACGCATACACCCTTTGAAACACTGTTTCATCAATTGGGTCCCTAATGTCCCTC

GTTGCTGTAATTTTATTCTTATTCATTATTTGAGAAGCATTACAGCCAAACGAGAA  
GTCGGAGCAGTAGAACTAACTGCAACTAACATTGAATGACTTTACGGCTGCCCTCCC  
CCCTACCACACATTTGAAGAGCCCGCATTCGTACAAGTTCGTATAAACTAAATGGCA  
CATCCCTCACAACCTCGGATTTCAAGACGCAGCTTCACCCTTAATAGAAGAACTACTT  
CACTTCCACGACCACGCCTTAATAATTGTAATTCTCATTAGCACAAATGGTACTTTATA  
TTATTGCGGCTATAGTCACAGCCAACTAACAGATAAACTTGTACTAGACTCTCAAG  
AAATTGAAATTATCTGAACAGTTCTCCCAGCTGTTATTCCTATCCTTATCGCCCTACC  
ATCCATCCGAATTTTGTACTTAATAGACGAAATTAATGACCCCCACCTTACAATCAA  
AGCCATCGGCCACCAATGATACTGAAGCTACGAATACACAGACTACGAAGACCTCG  
GTTTTGACTCATACATAATCCCCACACAAGACCTGACCCCCGGACAATTCCGACTAC  
TAGAAGCAGACCACCGAATAGTAATCCCAGTAGAATCTCCAATTCGCGTTTTAATCT  
CGGCTGAAGATGTCTTACATTCCTGGGCAGTCCCCTCTCTAGGCGTAAAAGTTGACG  
CCGTACCTGGACGATTGAACCAAGCAACCTTTATTGTTAGCCGACCAGGCGTATTTT  
TCGGACAATGTTCTGAAATTTGCGGGGCTAACCATAGTTTTTATACCCATTGTTGTAG  
AAGCAGTCCCCCTTGAACACTTTGAGAAGTGGTCTTCACTAATAATTGAAGACGCCT  
ATGGCCCATCAAGCACACCCATACCATAGTCGACCCCAGCCCATGACCCCTAAC  
AGGGGCTATTGCTGCCCTATTGATAACATCTGGCCTTGCTATCTGATTCCACTTCCAC  
TCCACAACCCTAATAACTATTGGGACAATCCTTCTCACCTTAACAATCTTCCAATGA  
TGACGGGACGTCGTACGAGAAGGCACATTTCAAGGACACCACACTCCCCCGTTCA  
AAAAGGCCTCCGATATGGGATAATTTTATTTATTACCTCAGAAGTCCTATTCTTCTTA  
GGCTTCTTCTGAGCCTTTTACCCTCAAGCCTAGCACCTACCCCTGAGCTAGGCGGC  
TTCTGACCACCAGCAGGCATTACTCCCTTAGACCCATTTGAAGTCCCACCTTCTTAAC  
ACAGCAGTCCTGCTCGCCTCTGGCGTAAGTGTACCTGAGCACATCACAGCATTATG  
GAGGGTAAACGAAAACAACTATTCAATCTCTTGCTCTTACAATCTTACTCGGGGGG  
TACTTCACTTTCCTTCAAGGCCTAGAGTATCACGAAGCCCCCTTACCATTGCAGAC  
GGGGTTTACGGCGCTGCATTCTTTGTTGCCACCGGCTTCCACGGATTACACGTCTTA  
ATTGGCACATCATTCTTAGCCGTTTGTCTATTACGCCAGATTCTTACCATTTCACAT  
CAAACCACCACTTTGGGTTTGAAGCAGCCGCATGATACTGACACTTCGTAGACGTCTG  
TCTGACTTTTCTCTATATCTCTATTTACTGATGAGGATCTTAATGGCCAGTCTACGT  
AAATCCCACCCCTCTTCTAAAAATCGCAAACGATGCTTTAGTCGACCTCCCCGCCCCC  
TCTAATATCTCGGTTTGATGGAACCTTTGGGTCTCTTTTAGGACTCTGTTTAATTACCC  
AAATTGCGACCGGCTTATTTCTAGCCATACACTACACATCAGACATTGCTACTGCCT  
TCACCTCCGTGGCCACATCTGTGAGACGTCAACTACGGCTGACTTATCCGAAGCA  
TTCATGCCAACGGCGCATCATTCTTTTTCATTTGCCTCTACCTTCATATTGGCCGAGG  
ACTATACTATGGCTCTTACCTCTATAAAGAAACATGAAGTGTGGGGTTATTCTTCTC  
CTTCTCGTAATAATAACAGCCTTCGTTGGATACGTCCTCCCTTGAGGACAAATGTCTG  
TTTTGAGGTGCAACCGTTATTACCAACCTTCTATCTGCCGTCCCCTACGTCGGAAAC  
ACCCTAGTCCAATGAATCTGAGGGGGTTTTTCTGTAGACAATGCTACCCTCACCCGG  
TTCTTTGCCTTCCACTTTCTCTTCCCCTTCATCATCGCTGCCGCAACATTAATTCATCT  
ACTCTTTCTTACGAGACTGGCTCAAACAACCCACCGGGCTAAACTCAGACTCCGA  
CAAAGTTCCCTTTCACCCCTACTTCACTTACAAAGACCTCTTGGCTTTGCAGTACTTC  
TACTGCATTAGCATCCCTAGCCCTATTTTCCCCAAATCTCTTAGGAGACCCAGATA  
ACTTTACCCCTGCAAATCCGCTTGTTACTCCCCACACATTAAGCCAGAGTGATACT  
TCCTGTTTGCCTATGCTATTCTACGCTCCATTCCAAACAAACTTGGAGGAGTACTTGC  
CCTTTTATTCTCCATCTTAGTTCTTATGCTCGTCCCTTTCCTTCATACCTCTAAACAAC  
GAAGCCTAATATTCCGTCCCCTAACACAATTCTTGTTTTGGTCTTTAGTAGCAGACGT  
TATGATTCTAACTTGAATTGGAGGGATGCCCGTAGAACACCCCTTCGTCAATCATTGG  
ACAAGTAGCGTCTCTCCTTTACTTCTCCCTCTTCCTAGTCCTGATCCCAACAGCAGGT

TGACTAGAGAATAAAGTCCTTGGATGAAAATATGATTTCAACTCTCATTACTCATAT  
TATCAACCCACTAACCTTTATTGTGCCTGTATTGCTAGCCGTAGCATTTCCTCACCCCTC  
CTTGAACGAAAAGTGCTAGGCTACATACAACCTACGAAAAGGGCCAAACATTGTTGG  
GCCTTACGGCCTCCTTCAACCTATTGCTGATGGCGTAAAACCTCTTTATTAAAGAACC  
CATTCGACCTTCAACCGCATCACCCGTCCTATTTCCTCGTAGCCCCCTATGCTCGCTCTC  
ACACTAGCCCTAACCCCTTTGAGCCCCCATACCTTTCCCGTACCCTGTCGTGGACCTTA  
ACCTAGGTATTTTATTTATTCTAGCTCTATCTAGCCTTGCAGTATATTCTATTCTGGG  
CTCCGGCTGAGCATCTAATTCAAAATATGCCCTAGTAGGGGGCACTGCGGGCTGTCGC  
ACAAACAATTTCTTACGAAGTTAGCCTTGGACTCATCTTACTAAACATTATCATCTTC  
ACCGGGGGCTTCACACTCCAAACCTTTAACACAGCCCAAGAGGCCATTTGACTGGTA  
GTGCCCCGCTTGACCGCTGGCTGCCATATGATATATCTCCACTCTTGCCGAAACAAAC  
CGTGCACCCTTCGACTTAACAGAAGGAGAATCTGAACTTGTCTCGGGCTTCAACGTA  
GAGTACGCAGGGGGACCCCTTCGCCTTGTTCTTCTTAGCCGAATATTCAAATATTCTC  
CTAATAAATACCCTGTCCGCTACACTATTTTTAGGGGGCTCCCACATCCCATCTATCC  
CGGAATTAAGTAGTATCAATATTATGACTAAAGCAGCCCTTCTATCAATTGTCTTCCT  
GTGGGTCCGAGCTTCGTACCCGCGATTCCGTTACGACCAACTTATGCACCTCATTTG  
AAAAAACTTTCTTCCACTGACTTTGGCACTAGTTATCTGACACTTGGCGCTCCCTATT  
GCATTGCTGGTCTCCCAACCACAACCTATAGATGAACCCCTACATCTTGACCACTCTT  
CTATTTGGTTTGGGCCTTGGAACAACACTCACGTTTGCAAGCTCACACTGGCTCCTC  
GCTTGAATAGGACTTGAGATTAATACACTAGCCATTATTCCCCTAATAGCCCAACAC  
CACCACCCCGGGCAGTCGAAGCTACTACTAAATACTTTCTCGCACAAAGCCACAGCA  
GCCGCCACCCTCCTGTTTGCAAGCACTACCAACGCTTGACTCACAGGCCAGTGGGAT  
ATTCAACAGATAACACATCCCCCTCCCCACAACAATGATTGTTATTGCCCTCGCGCTA  
AAGGTCGGACTGGCACCAATGCACTCTTGACTCCCCGAAGTACTCCAAGGGCTAGA  
CCTGACCACCGGGCTCATCCTCTAACCTGACAAAACTTGCAACCCTTTGCCCTCTT  
ACTACAAATTCAAACAACAACCCTACGCCTCTAATCATTATTGGCTTACTATCCACT  
CTCGTTGGTGGCTGAGGTGGTCTCAACCAAACCCAGCTGCGCAAGGTCCTCGCCTAC  
TCCTCAATTGCCACCTTGCTGAATAATGCTCATCCTTCAATTTTCACCCCTCCTTG  
CCCTTCTCACCCCTCCTCACGTACTTTCTATGACTTTCTCAGCATTCCCTAATTTTTAAAG  
TAAACAAAGCGACCACCGTCAATGCCCTCGCCATCTCGTGAACAAAAACTCCTGCCC  
TCACAGCCCTAGCACCCCTGGTTTTACTTTCTCTCGGCGGCCTTCCTCCCCTTACCGG  
CTTCATGCCCAAGTGATTCATTCTTCAGGAAGTACTAAACAAGACCTTCCGCACTT  
GCCACCCTCGCCGCTTTAACTGCCCTCTTGAGTCTCTACTTCTACTTGCGCCTCTCGT  
ATGCAATAACCCCTCACAATATTCCCCAACAACTAATTGGTGTCACTCCCTGACGAT  
TCTACTCCCCCAATTTACACTTCCCCTCGCCGTCTCCACTGCAGCAACCACCCTTCT  
TCTCCCCTAGCCCCCGCTGCCGTAGCACTACTGGTCACCTATGAGCCTTCTCCTAAC  
CATCATTTGATTGCCACCCTCCTCTCGACAGTACTAGCCCTTGATCCTTTTGATTA  
CCCCAAATTACACCAGACCACGAAAAGCTATCGCCGTACGAGTGCGGCTTTGACCC  
AATAGGATCCGCCCGGCTGCCTTTTTCACTGCGGTTTTTCTCATCGCCATCCTCTTT  
CTTCTCTTCGATTTAGAAATTGCTCTCCTCCTCCCTCTTCCATGAGGAGACCAACTAG  
CATCGCCACTACTGACGTTACCTGAGCTACAGCTGTCCTAGCCCTTCTAACCCTTG  
GCCTCATTTACGAATGAATGCAAGGAGGTCTAGAATGGGCTGAATATGCTAAAAGT  
CCTAATCCCAACACTTATGCTAATCCCAACAGCCTGGTTACTCAAACCCAGCTGACT  
CTGGCCCATGACTTTAATGTATAGCTTTTGTCATCTCCTTGGTTAGCCTTTCATGACTA  
AAGAACCCTCTCAGAAACCGGCTGATCGTCACTTAGCCTCTTTATAGCTACCGACTCC  
CTATCAACCCCCCTCCTCCTTCTTACATGCTGATTACTCCCCTAATAATTTTGGCAA  
GCCAAAAACACACAGCCTTAGAACCTCTTAGTCGCCAGCGCATGTACATCACACTTC  
TCGCCTCCTCCAGTTTTTCTTAATCCTAGCATTTAGCGCCACCGAACTGGTAATGTTT

TACGTAATATTTGAAGCCACCCTCATCCCCACGCTAATCATTATCACCCGCTGAGGA  
AACCAAACAGAACGTCTAAACGCAGGAACCTACTTTCTCTTCTATACATTAGCGGGC  
TCACTCCCTCTTCTCGTTGCTTTACTCCTACTCCAAAACACATCCGGCACCCCTGTCGC  
TGTTAACCCCTTCACTATACGGACCCGCTCGCTCTCGTCTTATGCAGACAACTATGA  
TGAGCAGGCTGTCTTTTAGCATTCCCTGGTTAAAATACCCCTCTACGGGGTCCACCTA  
TGGCTCCCTAAAGCCCATGTTGAAGCCCCAATTGCAGGCTCAATAATCCTTGCAGCG  
GTTCTACTGAAGCTAGGGGGATACGGCATGATCCGCATAATAACAATATTGGAACC  
TCTAACTAAGGAGTTAAGCTACCCCTTCATTGTCTTTGCACTTTGAGGGGTAAATTATA  
ACTGGGTCAATTTGTCTACGCCAGACAGACCTTAAGTCCCTAATTGCCTACTCCTCA  
GTCAGCCACATAGGCCTAGTGGCTGGAGGAATTCTTATCCAATCACCCCTGGGGCTTA  
ACAGGGGCTCTTACCCTCATAATTGCACACGGGCTTACTTCATCAGCCCTCTTCTGCT  
TAGCAAACACAACTATGAACGAACCCACAGTCGAACGATAGTCCTGGCGCGAGGA  
CTTCAAGTAGCCCTACCACTAATAGCCACTTGATGATTTATTTCTAGCTTGGCCAACC  
TAGCTCTGCCACCACTACCCAACCTCATGGGGGAGCTGATAATTATCACTTCTTTATT  
CAACTGGTCCTGATGAACTCTGGCATTAAACCGGTGCAGGCACTCTAATCACAGCTGG  
TACTCCCTTTACATATTCTTAATAACTCAGCGGGGCCCTCTCCCAACACATGTCATT  
GCACTTGAGCCATCTCACACCCGAGAACACCTTCTTATTGCCTTCACCTCATCCCCTT  
AATTCTACTCGTACTTAAGCCCGAGCTGATCTGAGGCTGAACTGCCCATGACCCCCA  
CACACTTTGCCTTCTCCTCAGCCTTTCTTCTGGGTTTAAACAGGCCTGGCATTCCACCG  
GTTTCACCTCCTTTCCGCCCTATTGTGCCTTGAAGGAATAATACTATCCCTATTTATT  
GCTCTCTCCCTATGAACGCTCCAACCTTGACTCAACCAACTTTTCAGCATCTCCAATAC  
TTCTGCTTGCATTTTTCAGCCTGCGAAGCAAGCGCCGGCCTCGCCCTATTAGTAGCCA  
CTGCTCGAACCACGGGACCGACCGATTACAAAGCCTAAATCTTCTCCAATGCTAAA  
TGTACCCACCTCCCTAATGATTTTCATCGAGCCTGATCACAATCTTTGCGTTACTAGC  
CTATCCTTTAATCACACGATCCGCCCTACACCTCGGGACCCTCAATGGGCTACCAC  
CCATGTCAAAACAGCTGTAAAAATAGCTTTCTTTGTTAGTCTGCTGCCTCTGACCCTA  
TTTCTTAATGAGGGCGCAGAAACAATCGTTACTAACTGAACCTGAATAAATACCAAC  
TCCTTCAATGTCAGCATTAGCTTGAAATTTGATTTCTACTCAATTATTTTTACACCCA  
TTGCCCTCTACGTAACCTTGATCCATCCTGGAGTTCGCATCATGGTATATGCACGCAG  
ACCCACACATGAACCGCTTCTTTAAATACCTCCTGACGTTTCTGATTGCCATAATCGT  
CCTAGTAACTGCAAACAATATGTTTCAACTATTTATCGGTTGAGAGGGCGTGGGGAT  
CATATCGTTCTTACTTATTGGATGGTGGTTCGGACGGGCGGATGCTAACACTGCAGC  
GTTCAAGCAGTACTTTACAACCGAGTAGGGGACATCGGGCTTATCTTCGCCATGGC  
TTGAATAGCAGCAAACCTAACTCCTGGGAGATGCAACAAATCTTTGCAACCACCA  
AAGACATAGACTTAACCTACCCTCTTCTCGGACTCATCATTGCAGCAACTGGCAAAT  
CGGCTCAATTCGGACTTCACCCTTGACTACCCTCCGCTATGGAGGGTCCCACACCGG  
TCTCTGCCCTACTTCATTCTAGCACTATGGTCGTTGCCGGCATTFTTTCTGCTAGTACG  
AATAAGCCCGCTACTGGAAAACAACCAAACCGCCCTCACAACTGCCTATGCCTCG  
GAGCTCTTACAACACTATTCACTGCAACCTGTGCCCTCACGCAAAATGATATTA  
AAATCGTCGCATTCTCTACATCCAGCCAGCTTGGGCTTATAATGGTAACCATTGGTC  
TAAACCAGCCACAACCTAGCATTTCTTCACATCTGTACACATGCCTTCTTCAAGGCCA  
TACTATTTTTATGCTCCGGATCTATTATCCACAGCCTAAATGATGAACAAGATATCC  
GGAAAATAGGGGGCATAACCCACCTTGCACCTTTCACATCCTCTTGCCTAACTATTG  
GCAGCCTCGCCCTCACAGGAACCCCTTCTTGGCTGGCTTCTTCTCTAAAGATGCCA  
TCATCGAAGCATTGAACACATCCACCTAAACGCCTGAGCCCTAACCTTAACCCTCC  
TAGCCACCTCTTTCACAGCAATCTACAGCTTTCGAGTAGTATTTTTTGTACCCATGGG  
CCACCCCGATTAGTCCCTCTCTCCGATCAACGAAAACAACCCAGCAGTGATTAAC  
CCACTTAAGCGACTAGCATGGGGGAGTATCGTTGCAGGCTTACTAATTACCTCTAAT

ATTACACCCTTGAAAACCCCTGTCATATCTATACCTCCCCTCCTTAAACTAGCTGCTC  
TTGCAGTCACAATCATCGGCCTTCTTGTTGCTATAGAGCTCGCCATGTTAACCAACA  
AACAAATATGAGCCAATACCCAACACGACATACACCACTTCTCTGCCTTATTAGGCTT  
CTTCCCCGGGGTTATACACCGCCTAACCCCTGTATTGCTCTTCTTCCTAGGCCAAAAC  
ATTGCTAACCAAACAGTAGATCAGACATGATTAGAAAAAACGGGGCCCCAAAGCCAT  
TGAAGCCGCTAACCGACCTCTCGTCTCCTCTACAAGTAACATTCAACGGGGGGTAAT  
CAAAACATATCTCCCCTCTTCCTCCTTACACTAGCCCTTATAATCCCCCTATTTCATCA  
CCTAATGACTTTTCGCTATATATTTAGTTTTATTTTCTCTTGTGTTGGGGTTAGTTGCAG  
TTGCTTCTAATCCGTCCCCTTATTTTGCTGCTTTGGGTTTGGTTGTGGTAGCTGGCAT  
GGGGTGTGGTATATTAGTCGGGCATGGAGGGCCCTTTTTGTCACTAGTCTTGTCTTA  
ATTTACTTAGGCGGGATGTTAGTTGTATTTGCATATTCAGCAGCGTTAGCTGCTGAG  
CCGTACCCAGAGAGCTGGGGTAGTTGGTCGGTAATGGTATACGGTTGTCTACACAG  
GGGGAGTATTATAGTTTCCGGGCTGTTTTGAGGGGGGTGGTATGAATCTTCTTGGGT  
TCTAGCAGATGAGTTAGGGGAGTTTTCCGTGTTTTCGAGGTGATATTGGAGGGGTAGC  
CTTAATATACTCTTCTGGGGGGTGGTTGTTAATCACTAGTGCATGGGTATTGCTTTTA  
ACTTTATTTGTAGTCCTTGAGTTAACCGGGGTATGAGTCGAGGGGCGTTGCGACGGT  
TT"/>

<sequence id="seq\_Hippoglossus\_stenolepis\_AM749126" spec="Sequence"  
taxon="Hippoglossus\_stenolepis\_AM749126" totalcount="4"  
value="ATGATACTAAGCTTCTTTGACCAATTTATATCCCCTTCATACCTCGGCATCCC  
ACTAATTGCTCTAGCGATTAGCCTGCCTTGAATTCTGTTCCCAACCCCGCAAGCCGC  
TGATTAAACAACCGCGTACTAACGCTTCAAGGGTGATTTATTAGCCGCTTCACCTCG  
CAACTTCTTCTACCCCTAAACCCCGGAGGCCACAAGTGGGCAGTTCTATTACCTCG  
TTAATGTTTTCTTTTCTATCAACATACTAGGACTCCTTCCATACACCTTCACACCAA  
CGACCCAACCTCTCCCTTAATATAGGCCTCGCAGTACCCCTTTGATTAGCAACTGTCA  
TTATGGGATACGAAATCAACCAACGCATGCCCTAGGCCACCTTCTTCCAGAAGGCAC  
CCCCACTGCCCTCATCCCTGTACTTATTATCATTGAAACAATTAGCCTATTTCATTGCA  
CCCCTCGCTCTCGGTGTCCGACTAACAGCAAATCTCACAGCAGGCCACCTCCTTATT  
CAACTCATTGCAACAGCTGCCTTCGTCCTTCTTCCCCTCATACCTGTTGTTGCTATCT  
TAACAACGGTGGTCCTCTTCCTCCTCACCTACTAGAAGTAGCCGTTGCCATGATTC  
AAGCTTATGTCTTTGTTCTACTCCTAAGCCTATATCTACAAGAGAACGTTTAATGCCT  
CAACTGAACCCCGCACCCCTGATTTGCAATTTTAGTTTTCTCTTGAATAATCTTTTTAA  
CTGTTATTCCCCCAAAGTTTTAGCACACACCTATCCTAATGAACCCACCTCCCAA  
GCACACAAAAACAAAACAGAGCCCTGAACTGACCATGATACTAAGTGGCAATCAC  
ACGTTGATTTTTCTCGACCAATCACAAAGACATCGGCACCCTCTATCTCGTATTTGGT  
GCCTGAGCCGGAATAGTGGGGACAGGCCTAAGTCTGCTTATTGCGGCAGAACTAAG  
CCAACCCGGGGCTCTCCTGGGAGACGACCAAATTTATAATGTAATCGTCACCGCACA  
CGCCTTTGTAATAATCTTTTTTATAGTAATACCCATTATGATTGGGGGGTTTCGGAAAC  
TGGCTTATTCCACTAATAATTGGGGCCCCAGATATGGCGTTCCCTCGAATGAATAAC  
ATGAGTTTCTGACTTCTTCCCCCCTCCTTTCTCCTCCTCTTAGCCTCTTCAGGTGTTGA  
AGCCGGAGCAGGTACCGGATGAACCGTATACCCCCCACTAGCTGGCAATTTAGCCC  
ACGCCGGGGCATCCGTAGACCTGACAATCTTCTCACTTCACCTTGCAGGAATTTTCAT  
CAATTCTGGGGGCAATTAACCTTTATTACTACTATCATTAACATGAAACCCACAACAG  
TCACTATGTACCAAATCCCCTTATTTGTTTGAGCCGTTCTTATTACAGCCGTACTTCT  
TCTTCTATCCCTGCCCGTTTTAGCCGCAGGAATTACAATACTACTGACAGACCGCAA  
CCTTAACACGACCTTCTTTGACCCTGCCGGAGGAGGTGACCCCATCCTCTACCAGCA  
CCTATTCTGATTCTTTGGTCACCCAGAGGTATACATTCTTATTCTCCCGGGCTTCGGA  
ATAATTTCTCACATTGTTGCATACTATGCAGGTAAGAAAGAACCTTTTGGCTACATG

GGGATAGTCTGAGCCATAATGGCCATTGGACTCCTGGGGTTCATTGTCTGGGCCCAT  
CACATATTTACAGTCGGAATAGATGTAGATACACGAGCCTACTTTACCTCTGCCACA  
ATAATCATTGCGATTCCAACCTGGCGTAAAAGTCTTTAGCTGACTCGCAACCCTCCAT  
GGAGGAAGCATTAAATGAGAAACACCCCTTCTATGAGCCCTCGGCTTTATTTTCTC  
TTTACAGTAGGGCGGTCTCACTGGCATCGTCTTAGCTAACTCCTCTCTCGATATTGTTT  
TGCATGACACATACTATGTAGTCGCTCACTTCCACTATGTACTATCTATGGGTGCTGT  
ATTTGCAATCGTTGCCGCCTTCGTCCACTGGTTTCCATTATTTACAGGCTATACCCTT  
CACTCCACATGAACAAAAATCCACTTCGGCCTGATATTTATTGGAGTCAATCTAACA  
TTCTTCCCCCAACATTTTCTGGGCCTGGCCGGAATACCCCGACGGTACTCAGACTAC  
CCAGATGCATACACCCTTTGAAACACTGTTTCATCAATCGGGTCCCTAATGTCCCTC  
GTTGCTGTAAATTTTATTTTATTCATTATTTGAGAAGCATTACAGCCAAACGAGAAG  
TCGGAGCAGTAGAACTAACTGCAACTAACATTGAATGACTTTACGGCTGCCCTCCGC  
CCTACCACACATTTGAAGAGCCCGCATTCGTACAAGTTCGTATAAACTAAATGGCAC  
ATCCCTCACAACCTCGGATTTCAAGACGCAGCTTCACCCTTAATAGAAGAACTACTTC  
ACTTCCACGACCACGCCTTAATAATTGTAATTCTCATTAGCACAATAGTACTTTATAT  
TATTGCGGCTATAGTCACAGCCAACTAACAGATAAACTTGTACTAGACTCTCAAGA  
AATTGAAATTATCTGAACAGTTCTCCCAGCTGTTATTCTTATCCTTATCGCCCTACCA  
TCCATCCGAATTTTGTACTTAATAGACGAAATTAATGACCCCCACCTGACAATTAAA  
GCCATTGGCCACCAGTGATACTGAAGCTACGAATACACAGACTACGAAGACCTCGG  
TTTTGACTCATAATAATCCCCACACAAGACCTGACCCCCGGACAATTCCGACTACT  
AGAAGCAGACCACCGAATAGTAATCCCGGTAGAATCCCCAATTCGCGTTTTAATCTC  
GGCTGAAGATGTCTTACATTCCCTGGGCAGTCCCCTCTCTAGGGCGTAAAAGTTGACGC  
CGTACCTGGACGATTGAACCAAGCAACCTTTATTGTTAGCCGACCAGGCGTATTTTT  
CGGACAATGTTCTGAGATTTGCGGGGCTAACCATAGTTTTATACCCATTGTTGTAGA  
AGCAGTCCCCCTTGAACACTTTGAGAACTGGTCTTCACTAATAATTGAAGACGCCTA  
TGGCCCATCAAGCACACCCATACCACATAGTCGACCCCAGCCCATGACCCCTAACA  
GGGGCTATTGCTGCCCTATTGATAACATCTGGCCTTGCTATCTGATTCCACTTCCACT  
CCACAACCCTGATAACTATTGGGACAATCCTTCTCACCTTAACAATCTTCCAATGAT  
GACGGGACGTCGTACGGGAAGGCACATTTCAAGGACACCACACTCCCCCGTTCAA  
AAAGGCCTCCGATATGGAATAATTTTATTTATTACCTCAGAAGTCCTATTCTTCTTAG  
GCTTCTTCTGAGCCTTTTACCATTCAAGCCTAGCACCTACCCCTGAACTAGGCGGCTT  
CTGACCACCGGCAGGCATTACTCCCTTAGACCCCTTTGAAGTCCCACTTCTTAACAC  
AGCAGTCCTGCTTGCCTCTGGCGTAACTGTTACCTGAGCACACCACAGCATTATAGA  
GGGTAAACGAAAACAACTATTCAATCTCTTGCTCTTACAATCTTACTCGGGGGGTA  
CTTCACTTTCCTTCAAGGCCTAGAGTATCACGAAGCCCCCTTCACCATTGCAGACGG  
AGTTTACGGCGCTACATTCTTTGTTGCCACCGGCTTCCACGGACTACACGTCTTAATT  
GGCACGTCATTCTTAGCCGTTTGTCTATTACGCCAAATTCTTCACCATTTACATCAA  
ACCACCACCTTTGGGTTTGAAGCAGCCGCATGATACTGACACTTCGTAGACGTCGTCT  
GACTTTTCCTCTATATCTCTATTTACTGATGAGGATCTTAATGGCCAGTCTACGTAAA  
TCCCACCCTCTTCTAAAAATCGCAAACGATGCTTTAGTCGACCTCCCAGCCCCCTCT  
AATATCTCTGTTTGATGAACTTTGGGTCTCTTTTAGGACTCTGTTTAATTACCCAAA  
TTGCAACCGGCTTATTTCTAGCCATACACTACACATCAGACATTGCTACTGCCTTCAC  
CTCCGTAGCCACATCTGTGAGACGTCAACTACGGCTGACTTATCCGAAGCATTCA  
TGCCAACGGCGCATCATTCTTTTTTCAATTTGCCTCTACCTTCATATTGGCCGAGGTCTA  
TACTATGGCTCTTACCTCTATAAAGAAACATGAACTGTTGGGGTTATTCTCCTCCTTC  
TCGTAATAATAACAGCCTTCGTTGGATACGTCCTCCCTTGAGGACAAATGTCGTTTT  
GAGGTGCAACCGTTATTACCAACCTTCTATCTGCCGTCCCCTACGTCGGAAACACCC  
TGGTCCAATGGATCTGAGGTGGTTTTTCTGTAGACAATGCTACCCTCACCCGGTTCTT

TGCCTTCCACTTTCTCTTCCCCTTCATCATCGCTGCCGCAACGTTAATTCATCTACTCT  
TTCTTCACGAAACTGGCTCAAACAACCCAACCGGGCTAAACTCAGACTCCGACAAA  
GTTCCCTTTCACCCCTACTTCACTTACAAGGACCTCTTGGCTTTGCAGTCCTTCTTAC  
TGCATTAGCATCCCTAGCCCTATTTTCCCCAAATCTCTTAGGAGACCCAGATAACTTT  
ACCCCTGCAAATCCGCTTGTTACTCCCCACACATTAAGCCAGAGTGATACTTCCTG  
TTTGCCTATGCTATTCTCCGCTCCATCCCAAACAAACTTGGAGGAGTACTTGCCCTTT  
TATTCTCAATCTTAGTTCTTATGCTCGTCCCCTTCCTTCATACCTCTAAACAACGAAG  
CCTGATATTCCGTCCCCTAACACAATTTTTGTTCTGATCTTTAGTAGCAGACGTTATG  
ATTCTAACTTGAATTGGAGGAATGCCCGTAGAACACCCCTTCGTTATCATTGGGCAA  
GTAGCGTCTCTCCTTTACTTCTCCCTCTTCCTAGTCCTGATCCCAACAGCAGGTTGAC  
TAGAGAATAAAGTCCTTGGATGAAAATATGATTTCAACTCTCATTACGCATATTATC  
AACCCACTAACCTTTATTGTACCTGTATTGCTAGCCGTAGCATTCCCTACCCTCCTTG  
AACGAAAAGTGCTAGGCTACATACAACCTCCGAAAAGGGCCAAACATCGTAGGGCCT  
TACGGCCTCCTTCAACCTATTGCTGATGGTGTAACCTCTTTATTAAAGAACCCATTC  
GACCTTCGACCGCATCACCCGTCTATTCTCCTGGCCCCCTATGCTCGCTCTCACACT  
AGCCCTAACCTTTGAGCCCCCATACTTTCCCGTACCCTGTCGTGGACCTTAACCTA  
GGTATTTTATTTATTCTAGCCCTATCTAGCCTTGACAGTATATTCTATTCTGGGCTCCG  
GCTGAGCATCTAATTCAAATATGCCCTAGTAGGGGCACTGCGGGCTGTCGCACAA  
ACAATTTCTTACGAAGTCAGCCTTGGACTCATCTTGCTAAACATTATCATCTTTACCG  
GAGGCTTCACACTTCAAACCTTTAACACAGCCCAAGAGGCCATTTGACTAGTAGTGC  
CCGCTTGACCACTGGCTGCCATATGATATATCTCCACTCTTGCCGAAACAAACCGTG  
CACCTTCGACTTAACAGAAGGAGAGTCTGAACTTGTCTCGGGCTTCAACGTAGAGT  
ACGCAGGCGGACCCTTCGCCTTGTTCTTCTTGCCGAATATTCAAATATTCTCCTAAT  
AAATACCCTGTCCGCTACACTATTTTTAGGGGCTCCACATTCCATCTATCCCAGA  
ATTAACCAGTATCAATATTATGACTAAAGCAGCCCTTCTGTCAATTGTCTTCCTATGA  
GTCCGAGCTTCGTACCCGCGATTCCGTTACGACCAACTTATGCACCTCATTGAAAA  
AACTTTCTTCCACTGACTTTGGCACTAGTTATCTGACACTTGGCGCTCCCTATTGCAT  
TCGCTGGTCTCCCACCACAACTATAGATGAACCCCTACATCTTGACCACTCTTCTATT  
TGGTTTGGGCCTAGGAACAACACTCACGTTTGCAAGCTCACACTGGCTTCTCGCTTG  
AATAGGACTTGAGATTAATACACTAGCCATTATTCCCCTAATAGCCCAACATCACCA  
CCCCCGGGCAGTCGAAGCTACCACTAAGTACTTTCTCGCACAAGCCACAGCAGCCG  
CCACCTCCTGTTTGCGAGTACTACCAACGCTTGACTCACAGGCCAATGGGACATTC  
AACAGATAACACACCCCCTCCCAACAACAATGATTGTTATTGCCCTCGCACTAAAAG  
TCGGACTGGCACCAATGCACTCTTGACTTCCCGAAGTACTCCAAGGACTAGACCTAA  
CCACCGGACTTATCCTCTCAACCTGACAAAAACTTGACACCCTTTGCCCTCTTACTACA  
AATTCAGACAACAACCCTACGCCTCTAATCATTATTGGCTTACTATCCACGCTCGTT  
GGTGGCTGAGGTGGTCTCAACCAAACCCAGTTACGCAAAGTCCTCGCCTACTCCTCA  
ATTGCCACCTTGCTGAATAATGCTGATCGTTCAATTTTACCCCTCCTTGCCCTTC  
TCACCCTCCTCACGTACTTTCTATGACTTTCTCAGCATTCTTAATTTTTAAAGTAAAT  
AAAGCCACCACTGTCAATGCCCTCGCAATCTCGTGAACAAAGACTCCTGCCCTCACA  
GCCCTAGCACCCCTGGTTTTACTATCCCTCGGCGGCCTTCCCCCCTTACCGGCTTCA  
TACCAAGTGATTTATTCTTCAGGAAGTACTAAGCAAGACCTTCCACACTTGCCAC  
CCTCGCCGCTTTAACTGCCCTCTTGAGTCTCTACTTCTACCTCCGTCTCTCATATGCA  
ATAACCCTCACAATATTCCCCAACAACCTCATTGGCGTCACTCCCTGACGATTCTAC  
TCCCCCAATTTACGCTTCCCCTCGCCGTCTCCACTGCAGCAACCACCCTTCTCCTCC  
CACTAGCCCCCGCTGCCGTAGCACTACTGGTCACCTATGAGCCTTCTTCTAACCATC  
ATTCGATTGCCACCCTCCTCTCGACAGTACTTGCCCTTGTGTCTTTTGATTACCCC  
AAATTACACCAGACCACGAAAACTATCACCTTACGAGTGCGGCTTTGACCCGATA



GGATCCGCCCCGGCTGCCTTTTTCACTGCGGTTTTTTCCTCATCGCCATCCTCTTTCTTCT  
ATTCGATTTAGAAATTGCTCTCCTCCTCCCTCTTCCATGAGGTGACCAACTAGCATCA  
CCACTACTGACATTCACCTGAGCTACAGCTGTCCTAGCCCTTCTAACCCTTGGCCTCA  
TTTACGAATGAATGCAAGGGGGTCTAGAATGGGCGGAATATGCTAAAAGTCCTAAT  
CCCAACACTTATGCTAATCCCAACAGCCTGGTTACTCAAACCCAACTGACTCTGACC  
CATGACTTTAATGTATAGCTTTTGCATCTCCTTGGTCAGCCTTTCGTGACTAAAAAAC  
CTCTCAGAAACCGGCTGATCGTCACTTAGCCTCTTTATAGCTACCGACTCCCTATCG  
ACCCCCCTCCTCGTTCTTACATGCTGATTACTCCCATAATAATTTTGGCAAGCCAGA  
AACACACAGCCTTAGAACCTCTTAGTCGCCAGCGCATGTACATCACACTTCTCGCCT  
CCTCCAGTTCTTCCTAATCCTAGCATTTAGCGCCACCGAACTGGTAATGTTTTACGTA  
ATATTTGAAGCCACCCTTATCCCCACGCTAATCATTATCACCCGCTGAGGAAACCAA  
ACAGAACGTCTAAACGCAGGAACCTACTTTCTCTTCTATACATTAGCGGGCTCACTC  
CCCCTTCTCGTTGCTTTACTCCTACTCCAAAACACATCCGGCACCCCTATCGTTGTAA  
CCCTTCACTATACGGACCCGCTCGCTCTCGTCTTATGCAGACAAACTATGATGAGCA  
GGCTGTCTTTTAGCATTTCCTGGTTAAAATACCCCTCTACGGGGTCCACCTATGGCTCC  
CTAAAGCCCATGTTGAAGCTCCAATTGCAGGCTCAATAATCCTTGCAGCAGTTCTAC  
TGAAGCTAGGGGGATACGGCATGATCCGCATGATAACGATATTGGAACCTCTAACT  
AAGGAATTAAGCTACCCCTTCATTGTCTTTGCACTTTGAGGGGTAAATTATAACTGGC  
TCAATTTGTCTACGCCAGACAGACCTTAAGTCCTTAATTGCCTACTCATCAGTCAGC  
CACATGGGCCTAGTGGCTGGGGGAATTCTTATTCAATCACCCCTGAGGCTTAACAGGA  
GCCCTCACCCCTCATAATTGCACACGGTCTTACTTCATCAGCCCTCTTCTGCTTGGCAA  
ACACAAACTATGAACGAACCCACAGTCGAACAATGGTCCTGGCGCGAGGACTTCAA  
GTAGCCCTACCACTAATAGCCACTTGGTGGTTTATTTCTAGCTTGGCCAACCTAGCTC  
TGCCACCACTACCCAACCTCATGGGGGAGCTGATAATTATCACTTCTTTATTCAACT  
GGTCCTGGTGAACCTCTGGCATTAAACCGGTGCAGGCACTCTAATCACAGCTGGTTACT  
CCCTTTACATATTCTTAATAACTCAACGGGGGCCCTATCCCAACACATGTCATTGCACT  
TGAACCATCTCACACCCGAGAACACCTTCTTATTGCCTTCACCTTATCCCCTTAATTC  
TGCTCGTACTTAAGCCCGAGCTGATCTGAGGCTGAACCTGCCTATGACCCCCACACAC  
TTTGCCTTCTCCTCAGCCTTTCTTCTGGGTTTAAACAGGCCTGGCATTCCACCGGTTTC  
ACCTCCTTTCCGCTCTATTGTGCCTTGAAGGAATAATACTATCCCTATTTATTGCTCT  
TTCCCTATGAACGCTACAACCTTGACTCAACCAACTTTTCAGCATCTCCAATACTTCTG  
CTTGCATTTTTCAGCCTGCGAAGCAAGCGCCGGTCTCGCCCTATTAGTAGCCACTGCT  
CGAACCCACGGGACCGACCGATTACAAAGCCTAAATCTTCTCCAATGCTAAATGTAC  
CCCACCTCCCTAATGATTTTCATCGAGCCTGATCACAATCTTTGCATTACTAGCCTATC  
CTTTAATCACACGATCCGTCCTACACCTCGAGGCCCTCAATGAGCTACCACCCATG  
TCAAAACAGCTGTAAAAATAGCTTTCTTTGTTAGTCTGCTACCTCTGACCCTATTTCT  
TAATGAGGGCGCAGAAACAATCGTTACTAATTGAACCTGAATAAATACTAACTCCTT  
CAATATCAACATTAGCTTGAAATTTGATTTCTACTCAATTATTTTTACACCCATTGCC  
CTCTACGTAACCTTGGTCCATCCTGGAGTTCGCATCATGATACATGCACGCAGACCCA  
CACATGAACCGCTTCTTTAAATACCTCCTGACGTTTCTGATTGCCATAATCGTCCTAG  
TAACTGCAAACAATATGTTTCAACTATTTATCGGCTGGGAGGGAGTGGGGATCATAT  
CGTTCTTACTTATTGGATGGTGGTTCGGACGGGCGGATGCTAACACTGCAGCGCTTC  
AAGCAGTAATTTACAACCGAGTAGGAGACATCGGACTTATCTTCGCCATGGCTTGAA  
TAGCAGCAAACCTTAACTCCTGAGAGATACAACAAATCTTTGCAACCACCAAGGAC  
ATAGACTTAACCTACCCTCTTCTCGGACTCATCATTGCAGCAACTGGCAAATCGGCT  
CAATTCGGACTTCACCCTTGACTACCCTCCGCTATGGAGGGTCCCACACCGGTCTCT  
GCCCTACTTCATTCTAGCACTATGGTCGTTGCCGGCATTTTCCTGCTAGTACGAATAA  
GCCCCCTCCTGGAAAACAACCAAACCGCCCTCACAACCTGCCTATGCCTCGGAGCTC

TTACAACACTATTCACTGCAACCTGTGCCCTCACGCAAAATGATATTAaaaaaaATCG  
TCGCATTCTCTACATCCAGCCAGCTTGGGCTTATAATGGTAACCATTGGTCTAAACC  
AACCACAACACTAGCATTCTTTCACATCTGTACACATGCCTTCTTTAAAGCCATACTGTT  
TTTATGCTCCGGATCTATTATCCACAGCCTAAATGATGAACAAGATATCCGCAAAAT  
AGGGGGCATAACCCACCTTGCACCTTTCACATCCTCTTGCCTAACTATTGGCAGCCT  
CGCCCTCACAGGAACCCCTTCTTGGCTGGCTTCTTCTCTAAAGATGCCATCATCGA  
AGCATTGAACACATCCACCTAAACGCCTGAGCCCTAACCTTAACCCCTCCTAGCCAC  
CTCTTTCACAGCAATCTACAGCTTTCGAGTAGTATTTTTTGTACCCATGGGGCACCCC  
CGATTTAGTCCCTCTCTCCGATCAACGAAAACAACCCAGCAGTAATTAACCCACTTA  
AGCGGCTAGCATGGGGAAGTATCGTTGCAGGCTTACTAATTACCTCTAATATTACAC  
CCTTAAAAACCCCTGTCATATCCATGCCTCCTCTCCTTAAACTAGCTGCTCTTGCAGT  
TACAATCATCGGCCTTCTTGTGCTATAGAGCTCGCCATATTAACCAACAAGCAATA  
TGAGCCAATACCCGGCACGACATACCCACTTCTCTGCCTTATTAGGCTTCTTCCCC  
GGGGTCATACACCGCCTAACCCCTGTATTGCTCTTCTTCTAGGCCAAAATATTGCT  
AACCAAAACAGTAGATCAGACATGATTAGAAAAAACAGGCCCCAAAGCCATTGAATC  
CGCTAACCGACCTCTAGTGTCTCTACAAGTAATATTCAACGGGGGGTGATCAAAAC  
ATATCTTCCCTCTTCCCTAACACTAGCCCTTATAATCCCCATATTCATCACCTAAT  
GACTTTCGCTATATATTTAGTTTTATTTTCTCTTGTGTTGGGGTTAGTTGCAGTTGCTT  
CTAATCCGTCCCCTTATTTTGCTGCTTTGGGTTTGGTTGTGGTAGCTGGCATGGGGTG  
TGGTATATTAGTTGGGCATGGAGGGCCCTTTTTGTCACTAGTCCTGTTCTTAATTTAC  
TTAGGCGGGATGTTAGTTGTATTTGCATATTCAGCAGCGTTAGCTGCTGAGCCGTAC  
CCAGAGAGCTGGGGTAGTTGGTTCGGTAATGGTCTACGGTTGTCTATACAGGAGGAG  
TATTATAGTTTCTGGATTGTTTTGAGGGGGGTGGTATGAATCTTCTTGGGTCTTAGCA  
GATGAGTTGGGGGAGTTTTCCGTATTTTCGAGGGGATATCGGAGGGGTAGCCTTAATA  
TACTCTTCTGGGGGGTGGTTGTTAATCACTAGTGCATGGGTATTGCTCTTAACCTTTGT  
TTGTAGTCCTTGAGTTAACCGGGGTATGAGCCGAGGGGCGTTGCGACGGTTT"/>

<sequence id="seq\_Hippoglossus\_stenolepis\_AM749127" spec="Sequence"  
taxon="Hippoglossus\_stenolepis\_AM749127" totalcount="4"  
value="ATGATACTAAGCTTCTTTGACCAATTTATATCCCCTTCATACCTCGGCATCCC  
ACTAATTGCACTAGCGATTAGCCTGCCTTGAATTCTGTTCCCAACCCCACAAGCCGC  
TGATTAAACAACCGCGTACTAACACTTCAAGGGTGATTTATTAGCCGCTTCACCTCG  
CAACTTCTTCTACCCCTAAACCCCGGAGGCCACAAGTGGGCAGTTCTATTACCTCG  
TTAATGTTTTCTTTTCTATCAACATGCTAGGACTCCTTCCATACACCTTCACACCAA  
CGACCCAACTCTCCCTTAATATAGGCCTCGCAGTACCCCTTTGATTAGCAACTGTCA  
TTATGGGATACGAAATCAACCAACGCATGCCCTAGGCCACCTTCTTCCAGAAGGCAC  
CCCCACTGCCCTCATCCCTGTACTTATTATCATTGAAACAATTAGCCTATTTCATTGCA  
CCCCTCGCTCTCGGTGTCCGACTAACAGCAAATCTCACAGCAGGCCACCTCCTTATT  
CAGCTCATTGCAACAGCTGCCTTCGTCCTTCTTCCCCTCATACCTGTTGTTGCTATCT  
TAACAACGGTGGTCCTCTTCTCCTCACCTACTAGAAGTAGCCGTTGCCATGATTC  
AAGCTTATGTCTTTGTTCTACTCCTAAGCCTATATCTACAAGAGAACGTTTAATGCCT  
CAACTGAACCCCGCACCTGATTTGCAATTTTAGTTTTCTCTTGAATAATCTTTTTAA  
CTGTTATTCCCCCAAAGTTTTAGCACACACCTATCCTAATGAACCCACCTCCCAA  
GCACACAAAAACAAAACAGAGCCCTGAAACTGACCATGATACTAAGTGGCAATCAC  
ACGTTGATTTTTCTCGACCAATCACAAAGACATCGGCACCCTCTATCTCGTATTTGGT  
GCCTGAGCCGGAATAGTGGGGACAGGCCTAAGTCTGCTTATTCGGGCAGAACTAAG  
CCAACCCGGGGCTCTCCTGGGAGACGACCAAATTTATAATGTAATCGTCACCGCACA  
CGCCTTTGTAATAATCTTTTTTATAGTAATACCCATTATGATTGGGGGGTTCGGAAAC  
TGGCTTATTCCACTAATAATTGGGGCCCCAGATATGGCGTTCCCTCGAATGAATAAT

ATGAGTTTCTGACTTCTTCCCCCTCCTTTCTCCTCCTCTTAGCCTCTTCAGGTGTTGA  
AGCCGGAGCAGGTACCGGATGAACCGTATACCCCCACTAGCTGGCAATTTAGCCC  
ACGCCGGAGCATCCGTAGACCTGACAATCTTCTCACTTCACCTTGCAGGAATTTTCAT  
CAATTCTGGGGGCAATTAACCTTTATTACTACTATCATTAACATGAAACCCACAACAG  
TCACTATGTACCAAATCCCCTTATTTGTTTGAGCCGTTCTTATTACAGCCGTACTTCT  
TCTTCTATCCCTGCCCCTTTAGCCGCAGGAATTACAATACTACTAACAGACCGCAA  
CCTTAACACGACCTTCTTTGACCCTGCCGGAGGAGGTGACCCCATCCTCTACCAGCA  
CCTATTCTGATTCTTTGGTCACCCAGAGGTATACATTCTTATTCTCCCGGGCTTCGGA  
ATAATTTCTCACATTGTTGCATACTATGCAGGTAAGAAAGAACCTTTTGGCTACATG  
GGGATAGTCTGAGCTATAATGGCCATTGGACTCCTGGGGTTTATTGTCTGGGCCCCT  
CACATATTTACAGTCGGAATAGATGTAGATACACGAGCCTACTTTACCTCTGCCACA  
ATAATCATTGCGATTCCAACCTGGCGTAAAAGTCTTTAGCTGACTTGCAACCCTCCAT  
GGAGGAAGCATTAAATGAGAAACACCCCTTCTATGAGCCCTCGGCTTTATTTTCCTC  
TTTACAGTAGGGCGGTCTCACTGGCATTGTCTTAGCTAACTCCTCTCTCGATATTGTTT  
TGCATGACACATACTATGTAGTCGCTCACTTCCACTATGTACTATCTATGGGTGCTGT  
ATTTGCAATCGTTGCCGCCTTCGTCCACTGGTTTCCATTATTTACAGGCTATACCCTT  
CACTCCACATGAACAAAAATCCACTTCGGCCTGATATTTATTGGAGTCAATCTAACA  
TTCTTCCCCCAACATTTTCTGGGCCTGGCCGGAATACCCCGACGGTACTCAGACTAC  
CCAGATGCATACACCCTTTGAAACACTGTTTCATCAATCGGGTCCCTAATGTCCCTC  
GTTGCTGTAATTTTATTTTATTTCATTATTTGAGAAGCATTACAGCCAAACGAGAAG  
TCGGAGCAGTAGAACTAACTGCAACTAACATTGAATGACTTTACGGCTGCCCTCCGC  
CCTACCACACATTTGAAGAGCCCGCATTCGTACAAGTTCGTATAAACTAAATGGCAC  
ATCCCTCACAACCTCGGATTTCAAGACGCAGCTTCACCCTTAATAGAAGAACTACTTC  
ACTTCCACGACCACGCCTTAATAATTGTAATTCTCATTAGCACAAATAGTACTTTATAT  
TATTGCGGCTATAGTCACAGCCAACTAACAGATAAACTTGTACTAGACTCTCAAGA  
AATTGAAATTATCTGAACAGTTCTCCCAGCTGTTATTCTTATCCTTATCGCCCTACCA  
TCCATCCGAATTTTGTACTTAATAGACGAAATTAATGACCCCCACCTGACAATTA  
GCCATTGGCCACCAGTGATACTGAAGCTACGAATACACAGACTACGAAGACCTCGG  
TTTTGACTCATACATAATCCCCACACAAGACCTGACCCCTGGACAATTCCGACTACT  
AGAAGCAGACCACCGAATAGTAATCCCGGTAGAATCCCCAATTCGCGTTTTAATCTC  
GGCTGAAGATGTCTTACATTCTTGGGCAGTCCCCTCTCTAGGCGTAAAAGTTGACGC  
CGTACCTGGACGATTGAACCAAGCAACCTTTATTGTTAGCCGACCAGGCGTATTTTT  
CGGACAATGTTCTGAGATTTGCGGGGCTAACCATAGTTTTATACCCATTGTTGTAGA  
AGCAGTCCCCCTTGAACACTTTGAGAACTGGTCTTCACTAATAATTGAAGACGCCTA  
TGGCCCATCAAGCACACCCCTACCACATAGTCGACCCCAAGCCATGACCCCTAACAG  
GGGCTATTGCTGCCCTATTGATAACATCTGGCCTTGCTATCTGATTCCACTTCCACTC  
CACAACCCTGATAACTATTGGGACAATCCTTCTCACCTTAACAATCTTCCAATGATG  
ACGGGACGTCGTACGGGAAGGCACATTTCAAGGACACCACACTCCCCCGTTCAAA  
AAGGCCTCCGATATGGTATAATTTTATTTATTACCTCAGAAGTCCTATTCTTCTTAGG  
CTTCTTCTGAGCCTTTTACCATTCAAGCCTAGCACCTACCCCTGAGCTAGGCGGCTTC  
TGACCACCGGCAGGCATTACTCCCTTAGACCCCTTTGAAGTCCCACTTCTTAACACA  
GCAGTCCTGCTTGCTCTGGCGTAACTGTTACCTGAGCACACCACAGCATTATAGAG  
GGTAAACGAAAACAACTATTCAATCTCTTGCTCTTACAATCTTACTCGGGGGGTAC  
TTCATTTTCTTCAAGGCCTAGAGTATCACGAAGCCCCCTTACCATTGCAGACGGA  
GTTTACGGCGCTACATTCTTTGTTGCCACCGGCTTCCACGGACTACACGTCTTAATTG  
GCACGTCAATCTTAGCCGTTTGTCTATTACGCCAAATCTTTCACCATTTACATCAAA  
CCACCCTTTGGGTTTGAAGCAGCCGCATGATACTGACACTTCGTAGACGTCGTCTG  
ACTTTTCCTCTATATCTCTATTTACTGATGAGGATCTTAATGGCCAGTCTACGTAAAT

CCCACCCTCTTCTAAAAATCGCAAACGATGCTTTAGTCGACCTCCCAGCCCCCTCTA  
ATATCTCTGTTTGATGAAACTTTGGGTCTCTTTTAGGACTCTGTTTAATTACCCAAAT  
TGCAACCGGCTTATTTCTAGCCATACTACACATCAGACATTGCTACTGCCTTCAC  
CTCCGTAGCCACATCTGTCGAGACGTCAACTACGGCTGACTTATCCGAAGCATTCA  
TGCCAACGGCGCATCATTCTTTTCATTTGCCTCTACCTTCATATTGGTCGAGGTCTA  
TACTATGGCTCTTACCTCTATAAAGAAACATGAACTGTTGGGGTTATTCTCCTCCTTC  
TCGTAATAATAACAGCCTTCGTTGGATACGTCCTCCCTTGAGGACAAATGTCATTTT  
GAGGTGCAACCGTTATTACCAACCTTCTATCTGCCGTCCCCTACGTCGGAAACACCC  
TGGTCCAATGGATCTGAGGTGGTTTTTCTGTAGACAATGCTACCCTCACCCGGTTCTT  
TGCCTTCCACTTCCTCTTCCCCTTCATCATCGCTGCCGCAACGTTAATTCATCTACTCT  
TTCTTCACGAAACTGGCTCAAACAACCCAACCGGGCTAAACTCAGACTCCGACAAA  
GTTCCCTTTCACCCCTACTTCACTTACAAGGACCTCTTGGCTTTGCAGTCCTTCTTAC  
TGCATTAGCATCCCTAGCCCTATTTTCCCCAAATCTCTTAGGAGACCCAGATAACTTT  
ACCCCTGCAAATCCGCTTGTTACTCCCCACACATTAAGCCAGAGTGATACTTCCTG  
TTTGCCTATGCTATTCTCCGCTCCATTCCAAACAAACTTGGAGGAGTACTTGCCCTTT  
TATTCTCAATCTTAGTTCTTATGCTCGTCCCCTTCCTTCATACCTCTAAACAACGAAG  
CCTGATATTCCGTCCCCTAACACAATTTTGTCTGATCTTTAGTAGCAGACGTTATG  
ATTCTAACTTGAATTGGAGGAATGCCCGTAGAACACCCCTTCGTTATCATTGGACAA  
GTAGCGTCTCTCCTTTACTTCTCCCTCTTCCTAGTCCTGATCCCAACAGCAGGTTGAC  
TAGAGAATAAAGTCCTTGGATGAAAATATGATTTCAACTCTCATTACGCATATTATC  
AACCCACTAACCTTTATTGTACCTGTATTGCTAGCCGTAGCATTCCCTACCCTCCTTG  
AACGAAAAGTGCTAGGCTACATACAACTCCGAAAAGGGCCAAACATCGTAGGGCCT  
TACGGCCTCCTTCAACCTATTGCTGATGGTGTAACCTCTTTATTAAAGAACCCATTC  
GACCTTCGACCGCATCACCCGTCCTATTCTCCTGGCCCCCTATGCTCGCTCTCACACT  
AGCCCTAACCTTTGAGCCCCCATACTTTCCCGTACCCTGTCTGGACCTTAACCTA  
GGTATTTTATTTATTCTAGCCCTATCTAGCCTTGCAGTATATTCTATTCTGGGCTCCG  
GCTGAGCATCTAATTCAAAATATGCCCTAGTAGGGGCACTGCGGGCTGTCGCACAA  
ACAATTTCTTACGAAGTTAGCCTTGGACTCATCTTGCTAAACATTATCATCTTTACCG  
GAGGCTTCACACTTCAAACCTTTAACACAGCCCAAGAGGCCATTTGACTAGTAGTGC  
CCGCTTGACCACTGGCTGCCATATGATATATCTCCACTCTTGCCGAAACAAACCGTG  
CACCCTTCGACTTAACAGAAGGAGAGTCTGAGCTTGTCTCGGGCTTCAACGTAGAGT  
ACGCAGGCGGACCCTTCGCCTTATTCTTCTTGGCCGAATATTCAAATATTCTCCTAAT  
AAATACCCTGTCCGCTACACTATTTTLAGGGGCCTCCCACATTCCATCTATCCCAGA  
ATTAACCAGTATCAATATTATGACTAAAGCAGCCCTTCTGTCAATTGTCTTCCTATGA  
GTCCGAGCTTCGTACCCGCGGTTCCGTTACGACCAACTTATGCACCTCATTGAAAA  
AACTTTCTTCCACTGACTTTGGCACTAGTTATCTGACACTTGGCGCTCCCTATTGCAT  
TCGCTGGTCTCCCACCACAACTATAGATGAACCCCTACATCTTGACCACTCTTCTATT  
TGGTTTGGGCCTAGGAACAACACTCACGTTTGCAAGCTCACACTGGCTCCTCGCTTG  
AATAGGACTTGAGATTAATACACTAGCCATTATTCCCCTAATAGCCCAACATCACCA  
CCCCCGGGCAGTCGAAGCTACCACTAAGTACTTTCTCGCACAAGCCACAGCAGCCG  
CCACCCTCCTGTTTGCAGTACTACCAACGCTTGACTCACAGGCCAATGGGACATTC  
AACAGATAACACATCCCCTCCCAACAACAATGATTGTTATTGCCCTCGCACTAAAAG  
TCGGACTGGCACCAATGCACTCTTGACTTCCCGAAGTACTCCAAGGACTAGACCTAA  
CCACCGGACTTATCCTCTCAACCTGACAAAAACTTGCAACCCTTTGCCCTCTTACTACA  
AATTCAAACAACAACCCTACGCCTCTAATCATTATTGGCTTACTATCCACGCTCGTT  
GGTGGCTGAGGTGGTCTCAACCAACCCAGTTACGCAAAGTCCTCGCCTACTCCTCA  
ATTGCCACCTTGCTGAATAATGCTGATCGTTCAATTTTACCCCTCCTTGCCCTTC  
TCACCCTCCTCACGTACTTTCTATGACTTTCTCAGCATTCTTAATTTTAAAGTAAAT

AAAGCCACCACTGTCAATGCCCTCGCAATCTCGTGAACAAAGACTCCTGCCCTCACA  
GCCCTAGCACCCCTGGTTTTACTATCCCTCGGCGGCCTTCCCCCCTTACCGGCTTCA  
TGCCCAAGTGATTTATTCTTCAGGAAGTACTAAGCAAGACCTTCCACACTTGCCAC  
CCTCGCCGCTTTAACTGCCCTCTTGAGTCTCTACTTCTACCTCCGTCTCTCGTATGCA  
ATAACCCTCACAATATTCCCCAACAACCTCATTGGCGTCACTCCCTGACGATTCTAC  
TCCCCCAATTTACGCTTCCCCTCGCCGTCTCCACTGCAGCAACCACCCTTCTTCTCC  
CACTAGCCCCCGCTGCCGTAGCACTACTGGTCACCTATGAGCCTTCTTCTAACCATC  
ATTTTCGATTGCCACCCTCCTCTCGACAGTACTTGCCCTTGTGTCCTTTTGATTACCCC  
AAATTACACCAGACCACGAAAACTATCACCTTACGAGTGCGGCTTTGACCCGATA  
GGATCCGCCCGACTGCCTTTTTTCACTGCGGTTTTTTCCTCATCGCCATCCTCTTTCTTCT  
ATTCGATTTAGAAATTGCTCTCCTCCTCCCTCTTCCATGAGGAGACCAACTAGCATC  
ACCACTACTGACATTCACCTGAGCTACAGCTGTCCTAGCCCTTCTAACCCTTGGCCTC  
ATTTACGAATGAATGCAAGGGGGTCTAGAATGGGCGGAATATGCTAAAAGTCCTAA  
TCCAACACTTATGCTAATCCCAACAGCCTGGTTACTCAAACCCAACTGACTCTGAC  
CCATGACTTTAATGTATAGCTTTTGCATCTCCTTGGTCAGCCTTTTCGTGACTAAAAAA  
CCTCTCAGAAACCGGCTGATCGTCACTTAGCCTCTTTATAGCTACCGACTCCCTATCG  
ACCCCCCTCCTCGTTCTTACATGCTGATTACTCCCCTAATAATTTTGGCAAGCCAGA  
AACACACAGCCTTAGAACCTCTTAGTCGCCAGCGCATGTACATCACACTTCTCGCCT  
CCTCCAGTTCTTCTTAATCCTAGCATTTAGCGCCACCAGAACTGGTAATGTTTTACGTA  
ATATTTGAAGCCACCCTTATCCCCACGCTAATCATTATCACCCGCTGAGGAAACCAA  
ACAGAACGTCTAAACGCAGGAACCTACTTTCTCTTCTATACATTAGCGGGCTCACTC  
CCCCTTCTCGTTGCTTTACTCCTACTCCAAAACACATCCGGCACCCCTATCGTTGTTAA  
CCGTTCACTACACGGACCCGCTCGCTCTCGTCTTATGCAGACAAACTATGATGAGCA  
GGCTGTCTTTTAGCATTCCTGGTTAAAATACCCCTCTACGGAGTCCACCTATGGCTCC  
CTAAAGCCCATGTTGAAGCTCCAATTGCAGGCTCAATAATCCTTGCAGCAGTTCTAC  
TGAAGCTAGGGGGATACGGCATGATCCGCATGATAACGATATTGGAACCTCTAACT  
AAGGAATTAAGCTACCCCTTCATTGTCTTTGCACTTTGAGGGGTAATTATAACTGGC  
TCAATTTGTCTACGCCAGACAGACCTTAAGTCCTTAATTGCCTACTCATCAGTCAGC  
CACATGGGCCTAGTGGCTGGGGGAATTCTTATTCAATCACCTGAGGCTTAACAGGA  
GCCCTCACCCCTCATAATTGCACACGGTCTTACTTCATCAGCCCTCTTCTGCTTGGCAA  
ACACAAACTATGAACGAACCCACAGTCGAACAATGGTCCTGGCGCGAGGGCTTCAA  
GTAGCCCTACCACTAATAGCCACTTGATGGTTTATTTCTAGCTTGGCCAACCTAGCTC  
TGCCACCACTACCCAACCTCATGGGGGAGCTGATAATTATCACTTCTTTATTCAACT  
GGTCCTGGTGAACCTCTGGCATTAAACCGGTGCAGGCACTCTAATCACAGCTGGTTACT  
CCCTTTACATATTCTTAATAACTCAACGGGGGCCCTCTCCCAACACATGTCATTGCACT  
TGAGCCATCTCACACCCGAGAACACCTTCTTATTGCCTTCACCTTATCCCCTTAATTC  
TGCTCGTACTTAAGCCCGAGCTGATCTGAGGCTGAACTGCCTATGACCCCCACACAC  
TTTGCCTTCTCCTCAGCCTTTCTTCTGGGTTTAAACAGGCCTGGCATTCCACCGGTTTC  
ACCTCCTTTCCGCTCTATTGTGCCTTGAAGGAATAATACTATCCCTATTTATTGCTCT  
TTCCCTATGAACGCTCCAACCTTGATTCAACCAGCTTTTCAGCATCTCCAATACTTCTG  
CTTGCATTTTCAGCCTGCGAAGCAAGCGCCGGTCTCGCCCTATTAGTAGCCACTGCT  
CGAACCCACGGGACCGACCGATTACAAAGCCTAAATCTTCTCCAATGCTAAATGTAC  
CCCACCTCCCTAATGATTTTCATCGAGCCTGATCACAATCTTTGCATTACTAGCCTATC  
CTTTAATCACACGATCCGTCTACACCTCGAGGCCCTCAATGAGCTACCACCCATG  
TCAAAACAGCTGTAAAAATAGCTTTCTTTGTTAGTCTGCTACCTCTGACCCTATTTCT  
TAATGAGGGGCGCAGAAACAATCGTTACTAATTGAACCTGAATAAATACTAACTCCTT  
CAATATCAACATTAGCTTGAAATTTGATTTCTACTCAATTATTTTTACACCCATTGCC  
CTCTACGTAACCTGGTCCATCCTAGAGTTCGCATCATGATACATGCACGCAGACCCA

CACATGAACCGCTTCTTTAAATACCTCCTGACGTTTCTGATTGCCATAATCGTCCTAG  
TAACTGCAAACAATATGTTTCAACTATTTATCGGCTGGGAGGGAGTGGGGATCATAT  
CGTTCTTACTTATTGGATGGTGGTTCGGACGGGCGGATGCTAACACTGCAGCGCTTC  
AAGCAGTAATTTACAACCGAGTAGGAGACATCGGACTTATCTTCGCCATGGCTTGAA  
TAGCAGCAAACCTAAACTCCTGAGAGATACAACAAATCTTTGCAACCACCAAGGAC  
ATAGACTTAACCTACCCTCTTCTCGGACTCATCATTGCAGCAACTGGCAAATCGGCT  
CAATTTCGGACTTCACCCTTGACTACCCTCCGCTATGGAGGGTCCCACACCGGTCTCT  
GCCCTACTTCATTCTAGCACTATGGTCGTTGCCGGCATTTCCTGCTAGTACGAATAA  
GCCCCCTCCTGGAAAACAACCAACCGCCCTCACAACCTGCCTATGCCTCGGAGCTC  
TTACAACACTATTCACTGCAACCTGTGCCCTCACGCAAAATGATATTAATAAAAAATCG  
TCGCATTCTCTACATCCAGCCAGCTTGGGCTTATAATGGTAACCATTGGTCTAAACC  
AACCACAACCTAGCATTTCTTCACATCTGTACACATGCCTTCTTCAAGGCCATACTGTT  
TTTATGCTCCGGATCTATTATCCACAGCCTAAATGACGAACAAGATATCCGCAAAAT  
AGGGGGGCATACACCACCTTGCACCTTTCACATCCTCTTGCCTAACTATTGGCAGCCT  
CGCCCTCACAGGAACCCCCCTTCTTGGCTGGCTTCTTCTCTAAAGATGCCATCATCGA  
AGCATTGAACACATCCCACCTAAACGCCTGAGCCCTAACCTTAACCCTCCTAGCCAC  
CTCTTTTACAGCAATCTACAGCTTTCGAGTAGTATTTTTTGTACCCATGGGGCCACCCC  
CGATTTAGTCCCTCTCTCCGATCAACGAAAACAACCCAGCAGTAATTAACCCACTTA  
AGCGACTAGCATGGGGAAGTATCGTTGCAGGCTTACTAATTACCTCTAATATTACAC  
CCTTAAAAACCCCTGTCATATCTATGCCGCCTCTCCTTAAACTAGCTGCTCTTGCAGT  
TACAATCATCGGCCTTCTTGTGCTATAGAGCTCGCCATATTAACCAACAAGCAATA  
TGAGCCAATACCCGGCACGACATACATCACTTCTCTGCCTTATTAGGCTTCTTCCCCG  
GGGTCATACACCGCCTAACCCTGTATTGCTCTTCTTCTAGGCCAAAACATTGCTA  
ACCAAACAGTAGATCAGACATGATTAGAAAAAACAGGCCCAAAGCCATTGAATCC  
GCTAACCGACCTCTAGTGTCTCTACAAGTAATATTCAACGGGGGGGTGATCAAAACA  
TATCTTCCCTCTTCCCTCCTAACACTAGCCCTTATAATCCCCATATTCATCACCTAATG  
ACTTTCGCTATATATTTAGTTTTATTTTCTCTTGTGTTGGGGTTAGTTGCAGTTGCTTC  
TAATCCGTCCCCCTTATTTTGCTGCTTTGGGTTTGGTTGTGGTAGCTGGCATGGGGTGT  
GGTATATTAGTTGGGCATGGAGGGCCCTTTTTGTCACTAGTCCTGTTCTTAATTTACT  
TAGGCGGGATGTTAGTTGTATTTGCATATTCAGCAGCGTTAGCTGCTGAGCCGTACC  
CAGAGAGCTGGGGTAGTTGGTCGGTAATGGTCTACGGTTGTCTATACAGGAGGAGT  
ATTATAGTTTCTGGATTGTTTTGAGGGGGGTGGTATGAATCTTCTTGGGTCTTAGCAG  
ATGAGTTGGGGGAGTTTTCCGTATTTTCGAGGGGATATCGGAGGGGTAGCCTTAATAT  
ACTCTTCTGGGGGGTGGTTGTAACTACTAGTGCATGGGTATTGCTCTTAACCTTTGTT  
TGTAGTCCTTGAGTTAACCAGGGGTATGAGCCGAGGGGCGTTGCGACGGTTT"/>

<sequence id="seq\_Hippoglossus\_stenolepis\_AM749128" spec="Sequence"  
taxon="Hippoglossus\_stenolepis\_AM749128" totalcount="4"  
value="ATGATACTAAGCTTCTTTGACCAATTTATATCCCCTTCATACCTCGGCATCCC  
ACTAATTGCACTAGCGATTAGCCTGCCTTGAATTCTGTTCCCAACCCCGCAAGCCGC  
TGATTAAACAACCGCGTACTAACACTTCAAGGGTGATTTATTAGCCGCTTCACCTCG  
CAACTTCTTCTACCCCTAAACCCCGGAGGCCACAAGTGGGCAGTTCTATTACCTCG  
TTAATGTTTTCTTTTCTATCAACATGCTAGGACTCCTTCCATACACCTTCACACCAA  
CGACCAACTCTCCCTTAATATAGGCCTCGCAGTACCCCTTTGATTAGCAACTGTCA  
TTATGGGATACGAAATCAACCAACGCATGCCCTAGGCCACCTTCTTCCAGAAGGCAC  
CCCCACTGCCCTCATCCCTGTACTTATTATCATTGAAACAATTAGCCTATTCAATTCGA  
CCCCTCGCTCTCGGTGTCCGACTAACAGCAAATCTCACAGCAGGCCACCTCCTCATT  
CAACTCATTGCAACAGCTGCCTTCGTCCTTCTTCCCCTCATACCTGTTGTTGCTATCT  
TAACAACGGTGGTCTCTTCTCCTCACCTACTAGAAGTAGCCGTTGCCATGATTC

AAGCTTATGTCTTTGTTCTACTCCTAAGCCTATATCTACAAGAGAACGTTTAAATGCCT  
CAACTGAACCCCGCACCCTGATTTGCAATTTTAGTTTTCTCTTGAATAATCTTTTTAA  
CTGTTATTCCCCCAAAGTTTTAGCACACACCTATCCTAATGAACCCACCTCCCAA  
GCACACAAAAACAAAACAGAGCCCTGAAACTGACCATGATACTAAGTGGCAATCAC  
ACGTTGATTTTTCTCGACCAATCACAAAGACATCGGCACCCTCTATCTCGTATTTGGT  
GCCTGAGCCGGAATAGTGGGGACAGGCCTAAGTCTGCTTATTCGGGCAGAACTAAG  
CCAACCCGGGGCTCTCCTGGGAGACGACCAAATTTATAATGTAATCGTCACCGCACA  
CGCCTTTGTAATAATCTTTTTTATAGTAATACCCATTATGATTGGGGGGTTCGGAAAC  
TGGCTTATTCCACTAATAATTGGGGCCCCAGATATGGCGTTCCCTCGAATGAATAAT  
ATGAGTTTCTGACTTCTTCCCCCTCCTTTCTCCTCCTCTTAGCCTCTTCAGGTGTTGA  
AGCCGGAGCAGGTACCGGATGAACCGTATACCCCCACTAGCTGGCAATTTAGCCC  
ACGCCGGAGCATCCGTAGACCTGACAATCTTCTCACTTCACCTTGCAGGAATTCAT  
CAATTCTGGGGGCAATTAACCTTTATTACTACTATCATTAACATGAAACCCACAACAG  
TCACTATGTACCAAATCCCCTTATTTGTTTGAGCCGTTCTTATTACAGCCGTACTTCT  
TCTTCTATCCCTGCCCGTTTTAGCCGCAGGAATTACAATACTACTAACAGACCGCAA  
CCTTAACACGACCTTCTTTGACCCTGCCGGAGGAGGTGACCCCATCCTCTACCAACA  
CCTATTCTGATTCTTTGGTCACCCAGAGGTATACATTCTTATTCTCCCGGGCTTCGGA  
ATAATTTCTCACATTGTTGCATACTATGCAGGTAAGAAAGAACCTTTTGGCTACATG  
GGGATAGTCTGAGCTATAATGGCCATTGGACTCCTGGGGTTCATTGTCTGGGCCCCAT  
CACATATTTACAGTCGGAATAGATGTAGACACACGAGCCTACTTTACCTCTGCCACA  
ATAATCATTGCGATTCCAACCTGGCGTAAAAGTCTTTAGCTGACTCGCAACCCTCCAT  
GGAGGAAGCATTAAATGAGAAACACCCCTTCTATGAGCCCTCGGCTTTATTTTCCTC  
TTTACAGTAGGCGGTCTCACTGGCATTGTCTTAGCTAACTCCTCTCTCGATATTGTTT  
TGCATGACACATACTATGTAGTCGCTCACTTCCACTATGTACTATCTATGGGTGCTGT  
ATTTGCAATCGTTGCCGCCTTCGTCCACTGGTTTCCATTATTTACAGGCTATACCCTT  
CACTCCACATGAACAAAAATCCACTTCGGCCTGATATTTATTGGGGTCAATCTAACA  
TTCTTCCCCCAACATTTTCTGGGCCTGGCCGGAATACCCCGACGGTACTCAGACTAC  
CCAGATGCATACACCCTTTGAAACACTGTTTCATCAATCGGGTCCCTAATGTCCCTC  
GTTGCTGTAATTTTATTTTATTTCATTATTTGAGAAGCATTACAGCCAAACGAGAAG  
TCGGAGCAGTAGAACTAACTGCAACTAACATTGAATGACTTTACGGCTGCCCTCCGC  
CCTACCACACATTTGAAGAGCCCGCATTCGTACAAGTTCGTATAAACTAAATGGCAC  
ATCCCTCACAACTCGGATTTCAAGACGCAGCTTCACCCTTAATAGAAGAACTACTTC  
ACTTCCACGACCACGCCTTAATAATTGTAATTCTCATTAGCACAAATAGTACTTTATAT  
TATTGCGGCTATAGTCACAGCCAACTAACAGATAAACTTGTACTAGACTCTCAAGA  
AATTGAAATTATCTGAACAGTTCTCCCAGCTGTTATTCTTATCCTTATCGCCCTACCA  
TCCATCCGAATTTTGTACTTAATAGACGAAATTAATGACCCCCACCTGACAATTA  
GCCATTGGCCACCAGTGATACTGAAGCTACGAATACACAGACTACGAAGACCTCGG  
TTTTGACTCATAATAATCCCCACACAAGACCTGACCCCTGGACAATTCCGACTACT  
AGAAGCAGACCACCGAATAGTAATCCCGGTAGAATCCCCAATTCGCGTTTTAATCTC  
GGCTGAAGATGTCTTACATTCCCTGGGCAGTCCCCCTCTCTAGGCGTAAAAGTTGACGC  
CGTACCTGGACGATTGAACCAAGCAACCTTTATTGTTAGCCGACCAGGCGTATTTTT  
CGGACAATGTTCTGAGATTTGCGGGGCTAACCATAGTTTTATACCCATTGTTGTAGA  
AGCAGTCCCCCTTGAACACTTTGAGAACTGGTCTTCACTAATAATTGAAGACGCCTA  
TGGCCCATCAAGCACACCCCTACCACATAGTCGACCCAGCCCATGACCCCTAACAG  
GGGCTATTGCTGCCCTATTGATAACATCTGGCCTTGCTATCTGATTCCACTTCCACTC  
CACAACCCTGATAACTATTGGGACAATCCTTCTCACCTTAACAATCTTCCAATGATG  
ACGGGACGTCGTACGGGAAGGCACATTTCAAGGACACCACACTCCCCCGTTCAA  
AAGGCCTCCGATATGGTATAATTTTATTTATTACCTCAGAAGTCCTATTCTTCTTAGG

CTTCTTCTGAGCCTTTTACCATTCAAGCCTAGCACCTACCCCTGAGCTAGGCGGCTTC  
TGACCACCGGCAGGCATTACTCCCTTAGACCCCTTTGAAGTCCCACCTTCTTAACACA  
GCAGTCCTGCTTGCCTCTGGCGTAACTGTTACCTGAGCACACCACAGCATTATAGAG  
GGTAAACGAAAACAACTATTCAATCTCTTGCTCTTACAATCTTACTCGGGGGGTAC  
TTCACCTTCCTTCAAGGCCTAGAGTATCACGAAGCCCCCTTACCATTGCAGACGGA  
GTTTACGGCGCTACATTCTTTGTTGCCACCGGCTTCCACGGACTACACGTCTTAATTG  
GCACGTCATTCTTAGCCGTTTGTCTATTACGCCAAATTCTTACCATTTCACATCAAA  
CCACCACTTTGGGTTTGAAGCAGCCGCATGATACTGACACTTCGTAGACGTCGTCTG  
ACTTTTCCCTCTATATCTCTATTTACTGATGAGGATCTTAATGGCCAGTCTACGTAAAT  
CCCACCCTCTTCTAAAAATCGCAAACGATGCTTTAGTCGACCTCCCAGCCCCCTCTA  
ATATCTCTGTTTGATGAACTTTGGGTCTCTTTTAGGACTCTGTTTAATTACCCAAAT  
TGCAACCGGCTTATTTCTAGCCATACACTACACATCAGACATTGCTACTGCCTTCAC  
CTCCGTAGCCACATCTGTCGAGACGTCAACTACGGCTGGCTTATCCGAAGCATTCA  
TGCCAACGGCGCATCATTCTTTTTTCAATTTGCCTCTACCTTCATATTGGTCGAGGTCTA  
TACTATGGCTCTTACCTCTATAAAGAAACATGAACTGTTGGGGTTATTCTCCTCCTTC  
TCGTAATAATAACAGCCTTCGTTGGATACGTCCTCCCTTGAGGACAAATGTCGTTTT  
GAGGTGCAACCGTTATTACCAACCTTCTATCTGCCGTCCCCTACGTCGGAAACACCC  
TGGTCCAATGGATCTGAGGTGGTTTTTCTGTAGACAATGCTACCCTCACCCGGTTCTT  
TGCCTTCCACTTCCTCTTCCCCTTCATCATCGCTGCCGCAACGTTAATTCATCTACTCT  
TTCTTCACGAACTGGCTCAAACAACCCAACCGGGCTAAACTCAGACTCCGACAAA  
GTTCCCTTTACCCCCTACTTCACTTACAAGGACCTCTTGGCTTTGCAGTCCTTCTTAC  
TGCATTAGCATCCCTAGCCCTATTTTCCCCAAATCTCTTAGGAGACCCAGATAACTTT  
ACCCCTGCAAATCCGCTTGTTACTCCTCCACACATTAAGCCAGAGTGATACTTCCTG  
TTTGCCTATGCTATTCTCCGCTCCATTCCAAACAACTTGGAGGAGTACTTGCCCTTT  
TATTCTCAATCTTAGTTCTTATGCTCGTCCCCTTCCTTCATACCTCTAAACAACGAAG  
CCTGATATTCCGTCCCCTAACACAATTTTTGTTCTGATCTTTAGTAGCAGACGTTATG  
ATTCTAACTTGAATTGGAGGAATGCCCGTAGAACACCCCTTCGTTATCATTGGACAA  
GTAGCGTCTCTCCTTTACTTCTCCCTCTTCCTAGTCCTGATCCCAACAGCAGGTTGAC  
TAGAGAATAAAGTCCTTGGATGAAAATATGATTTCAACTCTCATTACGCATATTATC  
AACCCACTAACCTTTATTGTACCTGTATTGCTAGCCGTAGCATTCCCTTACCCTCCTTG  
AACGAAAAGTGCTAGGCTACATACAACCTCCGAAAAGGGCCAAACATCGTAGGGCCT  
TACGGCCTCCTTCAACCTATTGCTGATGGTGTAACCTCTTTATTAAAGAACCCATTC  
GACCTTCGACCGCATCACCCGTCCTATTCTCCTGGCCCCCTATGCTCGCTCTCACACT  
AGCCCTAACCCCTTTGAGCCCCCATACTTTCCCGTACCCTGTCTGTTGACCTTAACCTA  
GGTATTTTATTTATTCTAGCCCTATCTAGCCTTGCAGTATATTCTATTCTGGGCTCCG  
GCTGAGCATCTAATTCAAAATATGCCCTAGTAGGGGCACTGCGGGGCTGTCGCACAA  
ACAATTTCTTACGAAGTTAGCCTTGGACTCATCTTGCTAAACATTATCATCTTTACCG  
GAGGCTTCACACTTCAAACCTTTAACACAGCCCAAGAGGCCATTTGACTAGTAGTGC  
CCGCTTGACCACTGGCTGCCATATGATATATCTCCACTCTTGCCGAAACAAACCGTG  
CACCCTTCGACTTAACAGAAGGAGAGTCTGAACTTGTCTCGGGCTTCAACGTAGAGT  
ACGCAGGCGGACCCTTCGCCTTGTTCTTCTTGGCCGAATATTCAAATATTCTCCTAAT  
AAATACCCTGTCCGCTACACTATTTTTAGGGGCTCCACATTCCATCTATCCCAGA  
ATTAACCAGTATCAATATTATGACTAAAGCAGCCCTTCTGTCAATTGTCTTCCTATGA  
GTCCGAGCTTCGTACCCGCGATTCCGTTACGACCAACTTATGCACCTCATTTGAAAA  
AACTTTCTTCCACTGACTTTGGCACTAGTTATCTGACACTTGGCGCTCCCTATTGCAT  
TCGCTGGTCTCCCAACCACTATAGATGAACCCCTACATCTTGACCACTCTTCTATT  
TGGTTTGGGCCTAGGAACAACACTCACGTTTGCAAGCTCACACTGGCTCCTCGCTTG  
AATAGGACTTGAGATTAATACTAGCCATTATTCCCCTAATAGCCCAACATCACCA



CCCCGGGCAGTCGAAGCTACCACTAAGTACTTTCTCGCACAAGCCACAGCAGCCG  
CCACCCTCCTGTTTTCGAGTACTACCAACGCTTGACTCACAGGCCAATGGGACATTC  
AACAGATAACACATCCCCCTCCCAACAACAATGATTGTTATTGCCCTCGCACTAAAAG  
TCGGACTGGCACCAATGCACTCTTGACTTCCCGAAGTACTCCAAGGACTAGACCTAA  
CCACCGGACTTATCCTCTCAACCTGACAAAACTTGCACCCTTTGCCCTCTTACTACA  
AATTCAAACAACAACCCTACGCCTCTAATCATTATTGGCTTACTATCCACGCTCGTT  
GGTGGCTGAGGTGGTCTCAACCAAACCCAGTTACGCAAAGTCCTCGCCTACTCCTCA  
ATTGCCCACCTTGGCTGAATAATGCTGATCGTTCAATTTTCACCCCTCCTTGCCCTTC  
TCACCCCTCCTCACGTACTTTCTATGACTTTCTCAGCATTCTTAATTTTTAAAGTAAAT  
AAAGCCACCACTGTCAATGCCCTCGCAATCTCGTGAACAAAGACTCCTGCCCTCACA  
GCCCTAGCACCCCTGGTTTTACTATCCCTCGGCGGCCTTCCCCCCCCTTACCGGCTTCA  
TACCCAAGTGATTTATTCTTCAGGAACTGACTAAGCAAGACCTTCCACACTTGCCAC  
CCTCGCCGCTTTAACTGCCCTCTTGAGTCTCTACTTCTACCTCCGTCTCTCGTATGCA  
ATAACCCTCACAATATTCCCCAACAACCTCATTGGCGTCACTCCCTGACGATTCTAC  
TCCCCCAATTTACGCTTCCCCTCGCCGTCTCCACTGCAGCAACCACCCTTCTTCTCC  
CACTAGCCCCCGCTGCCGTAGCACTACTGGTCACCTATGAGCCTTCTTCTAACCATC  
ATTTTCGATTGCCACCCTCCTCTCGACAGTACTTGCCCTTGTGTCTTTTGATTACCCC  
AAATTACACCAGACCACGAAAACTATCACCTTACGAGTGCGGCTTTGACCCGATA  
GGATCCGCCCGACTGCCTTTTTTCACTGCGGTTTTTCTCATCGCCATCCTCTTTCTTCT  
ATTCGATTTAGAAATTGCTCTCCTCCTCCCTCTTCCATGAGGAGACCAACTAGCATC  
ACCACTACTGACATTCACCTGAGCTACAGCTGTCTAGCCCTTCTAACCCTTGGCCTC  
ATTTACGAATGAATGCAAGGGGGTCTAGAATGGGCGGAATATGCTAAAAGTCCTAA  
TCCCAACACTTATGCTAATCCCAACAGCCTGGTTACTCAAACCCAAGTACTCTGAC  
CCATGACTTTAATGTATAGCTTTTGCATCTCCTTGGTCAGCCTTTCGTGACTAAAAA  
CCTCTCAGAAACCGGCTGATCGTCACTTAGCCTCTTTATAGCTACCGACTCCCTATCG  
ACCCCCCTCCTCGTTCTTACATGCTGATTACTCCCACTAATAATTTTGGCAAGCCAGA  
AACACACAGCCTTAGAACCTCTTAGTCGCCAGCGCATGTACATCACACTTCTCGCCT  
CCTCCAGTTCTTCCTAATCCTAGCATTTAGCGCCACCGAACTGGTAATGTTTTACGTA  
ATATTTGAAGCCACCCTTATCCCCACGCTAATCATTATCACCCGCTGAGGAAACCAA  
ACAGAACGTCTAAACGCAGGAACCTACTTTCTCTTCTATACATTAGCGGGCTCACTC  
CCCCTTCTCGTTGCTTTACTCCTACTCCAAAACACATCCGGCACCCCTATCGTTGTAA  
CCCTTCACTACACGGACCCGCTCGCTCTCGTCTTATGCAGACAACTATGATGAGCA  
GGCTGTCTTTTAGCATTCCTGGTTAAAATACCCCTCTACGGAGTCCACCTATGGCTCC  
CTAAAGCCCATGTTGAAGCTCCAATTGCAGGCTCAATAATCCTTGCAGCAGTTCTAC  
TGAAGCTAGGGGGATACGGCATGATCCGCATGATAACGATATTGGAACCTCTAACT  
AAGGAATTAAGCTACCCCTTCATTGTCTTTGCACTTTGAGGGGTAATTATAACTGGC  
TCAATTTGTCTACGCCAGACAGACCTTAAGTCCTTAATTGCCTACTCATCAGTCAGC  
CACATGGGCCTAGTGGCTGGGGGAATTCTTATTCAATCACCCCTGAGGCTTAACAGGA  
GCCCTCACCCCTCATAATTGCACACGGTCTTACTTCATCAGCCCTCTTCTGCTTGGCAA  
ACACAAACTATGAACGAACCCACAGTCGAACAATGGTCCTGGCGCGAGGACTTCAA  
GTAGCCCTACCACTAATAGCCACTTGATGGTTTATTTCTAGCTTGGCCAACCTAGCTC  
TGCCACCACTACCCAACCTCATGGGGGAGCTGATAATTATCACTTCTTTATTCAACT  
GGTCCTGGTGAACCTCTGGCATTAAACCGGTGCAGGCACTCTAATCACAGCTGGTTACT  
CCCTTTACATATTCTTAATAACTCAACGGGGGCCCTCTCCCAACACATGTCATTGCACT  
TGAGCCATCTCACACCCGAGAACACCTTCTTATTGCCTTCACCTTATCCCCTTAATTC  
TGCTCGTACTTAAGCCCGAGCTGATCTGAGGCTGAACTGCCTATGACCCCCACACAC  
TTTGCCTTCTCCTCAGCCTTTCTTCTGGGTTTAAACAGGCCTGGCATTCACCGGTTTC  
ACCTCCTTTCCGCTCTATTGTGCCTTGAAGGAATAATACTATCCCTATTTATTGCTCT

TTCCCTATGAACGCTCCAACCTTGATTCAACCAGCTTTTCAGCATCTCCAATACTTCTG  
CTTGCATTTTTCAGCCTGCGAAGCAAGCGCCGGTCTCGCCCTATTAGTAGCCACTGCT  
CGAACCCACGGGACCGACCGATTACAAAGCCTAAATCTTCTCCAATGCTAAATGTAC  
CCCACCTCCCTAATGATTTTCATCGAGCCTGATCACAATCTTTGCATTACTAGCCTATC  
CTTTAATCACCACGATCCGTCCTACACCTCGAGGCCCTCAATGAGCTACCACCCATG  
TCAAAACAGCTGTAAAAATAGCTTTCTTTGTTAGTCTGCTACCCCTGACCCTATTTCT  
TAATGAGGGCGCAGAAACAATCGTTACTAATTGAACCTGAATAAATACTAACTCCTT  
CAATATCAACATTAGCTTGAAATTTGATTTCTACTCAATTATTTTTACACCCATTGCC  
CTCTACGTAACCTGGTCCATCCTGGAGTTCGCATCATGATACATGCACGCAGACCCA  
CACATGAACCGCTTCTTTAAATACCTCCTGACGTTTCTGATTGCCATAATCGTCCTAG  
TAACTGCAAACAATATGTTTCAACTATTTATCGGCTGGGAGGGAGTGGGGATCATAT  
CGTTCTTACTTATTGGATGGTGGTTCGGACGGGGCGGATGCTAACACTGCAGCGCTTC  
AAGCAGTAATTTACAACCGAGTAGGAGACATCGGACTTATCTTCGCCATGGCTTGAA  
TAGCAGCAAACCTAAACTCCTGGGAGATACAACAAATCTTTGCAACCACCAAGGAC  
ATAGACTTAACCTACCCTCTTCTCGGACTCATCATTGCAGCAACTGGCAAATCGGCT  
CAATTCGGACTTCACCCTTGACTACCCTCCGCTATGGAGGGTCCCACACCGGTCTCT  
GCCCTACTTCATTCTAGCACTATGGTCGTTGCCGGCATTTTCCTGCTAGTACGAATAA  
GCCCCCTCCTGGAAAACAACCAACCGCCCTCACAACCTGCCTATGCCTCGGAGCTC  
TTACAACACTATTCACTGCAACCTGTGCCCTCACGCAAAATGATATTAATAAAAAATCG  
TCGCATTCTCTACATCCAGCCAGCTTGGGCTTATAATGGTAACCATTGGTCTAAACC  
AACCACAACCTAGCATTTCTTCACATCTGTACACATGCCTTCTTCAAGGCCATACTGTT  
TTTATGCTCCGGATCTATTATCCACAGCCTAAATGATGAACAAGATATCCGCAAAAT  
AGGGGGCATAACCCACCTTGACCTTTTACATCCTCTTGCCTAACTATTGGCAGCCT  
CGCCCTCACAGGAACCCCTTCTTGGCTGGCTTCTTCTCTAAAGATGCCATCATCGA  
AGCATTGAACACATCCCACCTAAACGCCTGAGCCCTAACCTTAACCTCCTAGCCAC  
CTCTTTCACAGCAATCTACAGCTTTCGAGTAGTATTTTTTGTACCCATGGGGCCACCCC  
CGATTTAGTCCCTCTCTCCGATCAACGAAAACAACCCAGCAGTAATTAACCCACTTA  
AGCGACTAGCATGGGGAAGTATCGTTGCAGGCTTACTAATTACCTCTAATATTACAC  
CCTTAAAAACCCCTGTCATATCTATGCCTCCTCTCCTTAAACTAGCTGCTCTTGCAGT  
TACAATCATCGGCCTTCTTGTGCTATAGAGCTCGCCATATTAACCAACAAGCAATA  
TGAGCCAATACCCGGCACGACATACACCACTTCTCTGCCTTATTAGGCTTCTTCCCC  
GGGGTCATACACCGCCTAACCCCTGTATTGCTCTTCTTCCTAGGCCAAAACATTGCT  
AACCAAACAGTAGATCAGACATGATTAGAAAAAACAGGCCCCAAAGCCATTGAATC  
CGCTAACCGACCTCTAGTGTCTCTACAAGTAATATTCAACGGGGGGGTGATCAAAAC  
ATATCTTCCCTCTTCCCTCCTAACACTAGCCCTTATAATCCCCATATTCATCACCTAAT  
GACTTTTCGCTATATATTTAGTTTTATTTTCTCTTGTGTTGGGGTTAGTTGCAGTTGCTT  
CTAATCCGTCCCCTTATTTTGCTGCTTTGGGTTTGGTTGTGGTAGCTGGCATGGGGTG  
TGGTATATTAGTTGGGCATGGAGGGGCCCTTTTGTCACTAGTCCTGTTCTTAATTTAC  
TTAGGCGGGATGTTAGTTGTATTTGCATATTCAGCAGCGTTAGCTGCTGAGCCGTAC  
CCAGAGAGCTGGGGTAGTTGGTCGGTAATGGTCTACGGTTGTCTATACAGGAGGAG  
TATTATAGTTTCTGGGTTGTTTTGAGGGGGGTGGTATGAATCTTCTTGGGTCTTAGCA  
GATGAGTTGGGGGAGTTTTCCGTGTTTCGAGGGGATATCGGAGGGGTAGCCTTAATA  
TACTCTTCTGGGGGGTGGTTGTTAATCACTAGTGCATGGGTATTGCTCTTAACCTTTGT  
TTGTAGTCCTTGAGTTAACCGGGGTATGAGCCGAGGGGCGTTGCGACGGTTT"/>

<sequence id="seq\_Hippoglossus\_stenolepis\_AM749129" spec="Sequence"  
taxon="Hippoglossus\_stenolepis\_AM749129" totalcount="4"  
value="ATGATACTAAGCTTCTTTGACCAATTTATATCCCCTTCATACCTCGGCATCCC  
ACTAATTGCACTAGCGATTAGCCTGCCTTGAATTCTGTTCCCAACCCCGCAAGCCG

TGATTAAACAACCGCGTACTAACACTTCAAGGGTGATTTATTAGCCGCTTCACCTCG  
CAACTTCTTCTACCCCTAAACCCCGGAGGCCACAAGTGGGCAGTTCTATTACCTCG  
TTAATGTTTTCTTTTCTATCAACATGCTAGGACTCCTTCCATACACCTTCACACCAA  
CGACCCAACTCTCCCTTAATATAGGCCTCGCAGTACCCCTTTGATTAGCAACTGTCA  
TTATGGGATACGAAATCAACCAACGCATGCCCTAGGCCACCTTCTTCCAGAAGGCAC  
CCCCACTGCCCTCATCCCTGTACTTATTATCATTGAAACAATTAGCCTATTCATTGCA  
CCCCTCGCCCTCGGTGTCCGACTAACAGCAAATCTCACAGCAGGCCATCTCCTTATT  
CAACTCATTGCAACAGCTGCCTTCGTCCTTCTTCCCCTCATACCTGTTGTTGCTATCT  
TAACAACGGTGGTCTCTTCTCCTCACCCTACTAGAAGTAGCCGTTGCCATGATTC  
AAGCTTATGTCTTTGTTCTACTCCTAAGCCTATATCTACAAGAGAACGTTTAATGCCT  
CAACTGAACCCCGCACCCCTGATTTGCAATTTTAGTTTTCTCTTGAATAATCTTTTTAA  
CTGTTATTCCCCCAAAGTTTTAGCACACACCTATCCTAATGAACCCACCTCCCAA  
GCACACAAAAACAAAACAGAGCCCTGAAACTGACCATGATACTAAGTGGCAATCAC  
ACGTTGATTTTTCTCGACCAATCACAAAGACATCGGCACCCTCTATCTCGTATTTGGT  
GCCTGAGCCGGAATAGTGGGGACAGGCCTAAGTCTGCTTATTCGGGCAGAACTAAG  
CCAACCCGGGGCTCTCCTGGGAGACGACCAAATTTATAATGTAATCGTCACCGCACA  
CGCCTTTGTAATAATCTTTTTTATAGTAATACCCATTATGATTGGGGGGTTTCGGAAAC  
TGGCTTATTCCACTAATAATTGGGGCCCCAGATATGGCGTTCCCTCGAATGAATAAT  
ATGAGTTTCTGACTTCTTCCCCCCTCCTTCTCCTCCTCTTAGCCTCTTCAGGTGTTGA  
AGCCGGAGCAGGTACCGGATGAACCGTATACCCCCCACTAGCTGGCAATTTAGCCC  
ACGCCGGAGCATCCGTAGACCTGACAATCTTCTCACTTCACCTTGCAGGAATTTTCAT  
CAATTCTGGGGGCAATTAACCTTTATTACTACTATCATTAACATGAAACCCACAACAG  
TCACTATGTACCAAATCCCCTTATTTGTTTGAGCCGTTCTTATTACAGCCGTACTTCT  
TCTTCTATCCCTGCCCGTTTTAGCCGCAGGAATTACAATACTACTAACAGACCGCAA  
CCTTAACACGACCTTCTTTGACCCTGCCGGAGGAGGTGACCCCATCCTCTACCAGCA  
CCTATTCTGATTCTTTGGTCACCCAGAGGTATACATTCTTATTCTCCCGGGCTTCGGA  
ATAATTTCTCACATTGTTGCATACTATGCAGGTAAGAAAGAACCTTTTGGCTACATG  
GGGATAGTCTGAGCTATAATGGCCATTGGACTCCTGGGGTTTATTGTCTGGGCCCAT  
CACATATTTACAGTCGGAATAGATGTAGACACACGAGCCTACTTTACCTCTGCCACA  
ATAATCATTGCGATTCCAACCTGGCGTAAAAGTCTTTAGCTGACTCGCAACCCCTCCAT  
GGAGGAAGCATTAAATGAGAAACACCCCTTCTATGAGCCCTCGGCTTTATTTTCCTC  
TTTACAGTAGGCGGTCTCACTGGCATTGTCTTAGCTAACTCCTCTCTCGATATTGTTT  
TGCATGACACATACTATGTAGTCGCTCACTTCCACTATGTACTATCTATGGGTGCTGT  
ATTTGCAATCGTTGCCGCCTTCGTCCACTGGTTTCCATTATTTACAGGCTATACCCTT  
CACTCCACATGAACAAAAATCCACTTCGGCCTGATATTTATTGGAGTCAATCTAACA  
TTCTTCCCCCAACATTTTCTGGGCCTGGCCGGAATACCCCGACGGTACTCAGACTAC  
CCAGATGCATACACCCTTTGAAACACTGTTTCATCAATCGGGTCCCTAATGTCCCTC  
GTTGCTGTAAATTTTATTTTATTCATTATTTGAGAAGCATTACAGCCAAACGAGAAG  
TCGGAGCAGTAGAACTAACTGCAACTAACATTGAATGACTTTACGGCTGCCCTCCGC  
CCTACCACACATTTGAAGAGCCCGCATTCGTACAAGTTCGTATAAACTAAATGGCAC  
ATCCCTCACAACTCGGATTTCAAGACGCAGCTTCACCCTTAATAGAAGAACTACTTC  
ACTTCCACGACCACGCCTTAATAATTGTAATTCTCATTAGCACAAATAGTACTTTATAT  
TATTGCGGCTATAGTCACAGCCAACTAACAGATAAACTTGTACTAGACTCTCAAGA  
AATTGAAATTATCTGAACAGTTCTCCCAGCTGTTATTCTTATCCTTATCGCCCTACCA  
TCCATCCGAATTTTGTACTTAATAGACGAAATTAATGACCCCCACCTGACAATTAAA  
GCCATTGGCCACCAGTGATACTGAAGCTACGAATACACAGACTACGAAGACCTCGG  
TTTTGACTCATACATAATCCCCACACAAGACCTGACCCCTGGACAATTCCGACTACT  
AGAAGCAGACCACCGAATAGTAATCCCGGTAGAATCCCCAATTCGCGTTTTAATCTC

GGCTGAAGATGTCTTACATTCTGGGCGAGTCCCCTCTCTAGGCGTAAAAGTTGACGC  
CGTACCTGGACGATTGAACCAAGCAACCTTTATTGTTAGCCGACCAGGCGTATTTTT  
CGGACAATGTTCTGAGATTTGCGGGGCTAACCATAGTTTTATACCCATTGTTGTAGA  
AGCAGTCCCCCTTGAACACTTTGAGAACTGGTCTTCACTAATAATTGAAGACGCCTA  
TGGCCCATCAAGCACACCCATACCACATAGTCGACCCCAGCCCATGACCCCTAACA  
GGGGCTATTGCTGCCCTATTGATAACATCTGGCCTTGCTATCTGATTCCACTTCCACT  
CCACAACCCTGATAACTATTGGGACAATCCTTCTCACCTTAACAATCTTCCAATGAT  
GACGGGACGTCGTACGGGAAGGCACATTTCAAGGACACCACACTCCCCCGTTCAA  
AAAGGCCTCCGATATGGTATAATTTTATTTATTACCTCAGAAGTCCTATTCTTCTTAG  
GCTTCTTCTGAGCCTTTTACCATTCAAGCCTAGCACCTACCCCTGAGCTAGGCGGCTT  
CTGACCACCGGCAGGCATTACTCCCTTAGACCCCTTTGAAGTCCCACTTCTTAACAC  
AGCAGTCCTGCTTGCCTCTGGCGTAACTGTTACCTGAGCACACCACAGCATTATAGA  
GGGTAAACGAAAACAACTATTCAATCTCTTGCTCTTACAATCTTACTCGGGGGGT  
CTTCACTTTCCTTCAAGGCCTAGAGTATCACGAAGCCCCCTTCACCATTGCAGACGG  
AGTTTACGGCGCTACATTCTTTGTTGCCACCGGCTTCCACGGACTACACGTCTTAATT  
GGCACATCATTCTTAGCCGTTTGTCTATTACGCCAAATTCTTCACCATTTCACATCAA  
ACCACCACTTTGGGTTTGAAGCAGCCGCATGATACTGACACTTCGTAGACGTCGTCT  
GACTTTTCTCTATATTTCTATTTACTGATGAGGATCTTAATGGCCAGTCTACGTAAA  
TCCCACCCTCTTCTAAAAATCGCAAACGATGCTTTAGTCGACCTCCCAGCCCCCTCT  
AATATCTCTGTTTGATGAACTTTGGGTCTCTTTTAGGACTCTGTTTAATTACCCAAA  
TTGCAACCGGCTTATTTCTAGCCATACACTACACATCAGACATTGCTACTGCCTTAC  
CTCCGTAGCCACATCTGTGAGACGTCAACTACGGCTGGCTTATCCGAAGCATTCA  
TGCCAACGGCGCATCATTCTTTTTTCATTTGCCTCTACCTTCATATTGGTCGAGGTCTA  
TACTATGGCTCTTACCTCTATAAAGAAACATGAACTGTTGGGGTTATTCTCCTCCTTC  
TCGTAATAATAACAGCCTTCGTTGGATACGTCCTCCCTTGAGGACAAATGTCGTTTT  
GAGGTGCAACCGTTATTACCAACCTTCTATCTGCCGTCCCCTACGTCGGAAACACCC  
TGGTCCAATGGATCTGAGGTGGTTTTTCTGTAGACAATGCTACCCTCACCCGGTTCTT  
TGCCTTCCACTTCCTCTTCCCCTTCATCATCGCTGCCGCAACGTTAATTCATCTACTCT  
TTCTTCACGAACTGGCTCAAACAACCCAACCGGGCTAACTCAGACTCCGACAAA  
GTTCCCTTTCACCCCTACTTCACTTACAAGGACCTCTTGGCTTTGCAGTCCTTCTTAC  
TGCATTAGCATCCCTAGCCCTATTTTCCCCAAATCTCTTAGGAGACCCAGATAACTTT  
ACCCCTGCAAATCCGCTTGTTACTCCCCACACATTAAGCCAGAGTGATACTTCCTG  
TTTGCCTATGCTATTCTCCGCTCCATTCCAAACAACTTGGAGGAGTACTTGCCCTTT  
TATTCTCAATCTTAGTTCTTATGCTCGTCCCCTTCCTTCATACCTCTAAACAACGAAG  
CCTGATATTCCGTCCCCTAACACAATTTTTGTTCTGATCTTTAGTAGCAGACGTTATG  
ATTCTAACTTGAATTGGAGGAATGCCCGTAGAACACCCCTTCGTTATCATTGGACAA  
GTAGCGTCTCTCCTTTACTTCTCCCTCTTCCTAGTCCTGATCCCAACAGCAGGTTGAC  
TAGAGAATAAAGTCCTTGGATGAAAATATGATTTCAACTCTCATTACGCATATTATC  
AACCCTAACCCTTTATTGTACCTGTATTGCTAGCCGTAGCATTCCCTACCCTCCTTG  
AACGAAAAGTGCTAGGCTACATACAACCTCCGAAAAGGGCCAAACATCGTAGGGCCT  
TACGGCCTCCTTCAACCTATTGCTGATGGTGTAACCTCTTTATTAAAGAACCCATTC  
GACCTTCGACCGCATACCCGTCTATTCTCCTGGCCCCCTATGCTCGCTCTCACACT  
AGCCCTAACCCTTTGAGCCCCCATACTTTCCCGTACCCTGTGCTGGACCTTAACCTA  
GGTATTTTATTTATTCTAGCCCTATCTAGCCTTGACGTATATTCTATTCTGGGCTCCG  
GCTGAGCATCTAATTCAAAATATGCCCTAGTAGGGGCACTGCGGGCTGTCGCACAA  
ACAATTTCTTACGAAGTTAGCCTTGGACTCATCTTGCTAAACATTATCATCTTTACCG  
GAGGCTTCACACTTCAAACCTTTAACACAGCCCAAGAGGCCATTTGACTAGTAGTGC  
CCGCTTGACCACTGGCTGCCATATGATATATCTCCACTCTTGCCGAAACAAACCGTG

CACCCTTCGACTTAACAGAAGGAGAGTCTGAACTTGTCTCGGGCTTCAACGTAGAGT  
ACGCAGGCGGACCCTTCGCCTTGTTCTTCTTGCCGAATATTCAAATATTCTCCTAAT  
AAATACCCTGTCCGCTACACTATTTTTAGGGGCTCCACATTCCATCTATCCCAGA  
ATTAACCAGTATCAATATTATGACTAAAGCAGCCCTTCTGTCAATTGTCTTCCTATGA  
GTCCGAGCTTCGTACCCGCGATTCCGTTACGACCAACTTATGCACCTCATTTGAAAA  
AACTTTCTTCCACTGACTTTGGCACTAGTTATCTGACACTTGGCGCTCCCTATTGCAT  
TCGCTGGTCTCCCACCACAACCTATAGATGAACCCCTACATCTTGACCACTCTTCTATT  
TGGTTTGGGCCTAGGAACAACACTCACGTTTGCAAGCTCACACTGGCTCCTCGCTTG  
AATAGGACTTGAGATTAATACACTAGCCATTATTCCCCTAATAGCCCAACATCACCA  
CCCCCGGGCAGTCGAAGCTACCACTAAGTACTTTCTCGCACAAGCCACAGCAGCCG  
CCACCCTCCTGTTTGCGAGTACTACCAACGCTTGACTCACAGGCCAATGGGACATTC  
AACAGATAACACATCCCCTCCCAACAACAATGATTGTTATTGCCCTCGCACTAAAAG  
TCGGACTGGCACCAATGCACTCTTGACTTCCCGAAGTACTCCAAGGACTAGACCTAA  
CCACCGGACTTATCCTCTCAACCTGACAAAAACTTGCACCCTTTGCCCTCTTACTACA  
AATTCAAACAACAACCCTACGCCTCTAATCATTATTGGCTTACTATCCACGCTCGTT  
GGTGGCTGAGGTGGTCTCAACCAAACCCAGTTACGCAAAGTCCTCGCCTACTCCTCA  
ATTGCCACCTTGGCTGAATAATGCTGATCGTTCAATTTTACCCCTCCTTGCCCTTC  
TCACCCTCCTCACGTACTTTCTATGACTTTCTCAGCATTCCTAATTTTTAAAGTAAAT  
AAAGCCACCCTGTCAATGCCCTCGCAATCTCGTGAACAAAGACTCCTGCCCTCACA  
GCCCTAGCACCCCTGGTTTTACTATCCCTCGGCGGCCTTCCCCCCTTACCGGCTTCA  
TACCCAAGTGATTTATTCTTCAGGAAGTACTAAGCAAGACCTTCCACACTTGCCAC  
CCTCGCCGCTTTAACTGCCCTCTTGAGTCTCTACTTCTACCTCCGTCTCTCGTATGCA  
ATAACCCTCACAATATTCCCCAACAACCTCATTGGCGTCACTCCCTGACGATTCTAC  
TCCCCCAATTTACGCTTCCCCTCGCCGTCTCCACTGCAGCAACCACCCTTCTTCTCC  
CACTAGCCCCCGCTGCCGTAGCACTACTGGTCACCTATGAGCCTTCTTCTAACCATC  
ATTTGATTGCCACCCTCCTCTCGACAGTACTTGGCCCTTGTGTCTTTTGATTACCCC  
AAATTACACCAGACCACGAAAACTATCACCTTACGAGTGCGGCTTTGACCCGATA  
GGATCCGCCCCGACTGCCTTTTTTCACTGCGGTTTTTTCCTCATCGCCATCCTCTTTCTTCT  
ATTCGATTTAGAAATTGCTCTCCTCCTCCCTCTTCCATGAGGAGACCAACTAGCATC  
ACCACTACTGACATTCACCTGAGCTACAGCTGTCCTAGCCCTTCTAACCCTTGGCCTC  
ATTTACGAATGAATGCAAGGGGGTCTAGAATGGGCGGAATATGCTAAAAGTCCTAA  
TCCAACACTTATGCTAATCCCAACAGCCTGGTTACTCAAACCCAACTGACTCTGAC  
CCATGACTTTAATGTATAGCTTTTGCATCTCCTTGGTCAGCCTTTCGTGACTAAAAAA  
CCTCTCAGAAACCGGCTGATCGTCACTTAGCCTCTTTATAGTACCGACTCCCTATCG  
ACCCCTCCTCGTTCTTACATGCTGATTACTCCCCTAATAATTTTGGCAAGCCAGA  
AACACACAGCCTTAGAACCTCTTAGTCGCCAGCGCATGTACATCACACTTCTCGCCT  
CCTCCAGTTCTTCCTAATCCTAGCATTTAGCGCCACCGAACTGGTAATGTTTTACGTA  
ATATTTGAAGCCACCCTTATCCCCACGCTAATCATTATCACCCGCTGAGGAAACCAA  
ACAGAACGTCTAAACGCAGGAACCTACTTTCTCTTCTATACATTAGCGGGCTCACTC  
CCCCCTTCTCGTTGCTTTACTCCTACTCCAAAACACATCCGGCACCCCTATCGTTGTAA  
CCCTTCACTACACGGACCCGCTCGCTCTCGTCTTATGCAGACAACTATGATGAGCA  
GGCTGTCTTTTAGCATTCCTGGTTAAAATACCCCTCTACGGAGTCCACCTATGGCTCC  
CTAAAGCCCATGTTGAAGCTCCAATTGCAGGCTCAATAATCCTTGCAGCAGTTCTAC  
TGAAGCTAGGGGGATACGGCATGATCCGCATGATAACGATATTGGAACCTCTAACT  
AAGGAATTAAGCTACCCCTTCATTGTCTTTGCACTTTGAGGGGTAATTATAACTGGC  
TCAATTTGTCTACGCCAGACAGACCTTAAGTCCTTAATTGCCTACTCATCAGTCAGC  
CACATGGGCCTAGTGGCTGGGGGAATTCTTATTCAATCACCTGAGGCTTAACAGGA  
GCCCTCACCTCATAATTGCACACGGTCTTACTTCATCAGCCCTCTTCTGCTTGGCAA

ACACAAACTATGAACGAACCCACAGTCGAACAATGGTCCTGGCGCGAGGACTTCAA  
GTAGCCCTACCACTAATAGCCACTTGATGGTTTATTTCTAGCTTGGCCAACCTAGCTC  
TGCCACCACTACCCAACCTCATGGGGGAGCTGATAATTATCACTTCTTTATTCAACT  
GGTCCTGGTGAACCTCTGGCATTAAACCGGTGCAGGCACTCTAATCACAGCTGGTTACT  
CCCTTTACATATTCTTAATAACTCAACGGGGGCCCTCTCCCAACACATGTCATTGCACT  
TGAGCCATCTCACACCCGAGAACACCTTCTTATCGCCTTCACCTTATCCCCTTAATTC  
TGCTCGTACTTAAGCCCGAGCTGATCTGAGGCTGAACTGCCTATGACCCCCACACAC  
TTTGCCTTCTCCTCAGCCTTTCTTCTGGGTTTAACAGGCCTGGCATTCCACCGGTTTC  
ACCTCCTTTCCGCTCTATTGTGCCTTGAAGGAATAATACTATCCCTATTTATTGCTCT  
TTCCCTATGAACGCTCCAACCTTGATTCAACCAGCTTTTCAGCATCTCCAATACTTCTG  
CTTGCATTTTTCAGCCTGCGAAGCAAGCGCCGGTCTCGCCCTATTAGTAGCCACTGCT  
CGAACCACGCGGACCGACCGATTACAAAGCCTAAATCTTCTCCAATGCTAAATGTGC  
CCCACCTCCCTAATGATTTTCATCGAGCCTGATCACAATCTTTGCATTACTAGCCTATC  
CTTTAATCACCACGATCCGTCCTACACCTCGAGGCCCTCAATGAGCTACCACCCATG  
TCAAAACAGCTGTAAAAATAGCTTTCTTTGTTAGTCTGCTACCCCTGACCCTATTTCT  
TAATGAGGGCGCAGAAACAATCGTTACTAATTGAACCTGAATAAATACTAACTCCTT  
CAATATCAACATTAGCTTGAAATTTGATTTCTACTCAATTATTTTTACACCCATTGCC  
CTCTACGTAACCTGGTCCATCCTGGAGTTCGCATCATGATACATGCACGCAGACCCA  
CACATGAACCGCTTCTTTAAATACCTCCTGACGTTTCTGATTGCCATAATCGTCCTAG  
TAACTGCAAACAATATGTTTCAACTATTTATCGGCTGGGAGGGAGTGGGGATCATAT  
CGTTCTTACTTATTGGATGGTGGTTCGGACGGGGCGGATGCTAACACTGCAGCGCTTC  
AAGCAGTAATTTACAACCGAGTAGGAGACATCGGACTTATCTTCGCCATGGCTTGAA  
TAGCAGCAAACCTAAACTCCTGAGAGATACAACAAATCTTTGCAACCACCAAGGAC  
ATAGACTTAACCTACCCTCTTCTCGGACTCATCATTGCAGCAACTGGCAAATCGGCT  
CAATTCGGACTTCACCCTTGACTACCCTCCGCTATGGAGGGTCCCACACCGGTCTCT  
GCCCTACTTCATTCTAGCACTATGGTCGTTGCCGGCATTTCCTGCTAGTACGAATAA  
GCCCCCTCCTGGAAAACAACCAACCGCCCTCACAACCTGCCTATGCCTCGGAGCTC  
TTACAACACTATTCACTGCAACCTGTGCCCTCACGCAAAATGATATTAAAAAAATCG  
TCGCATTCTCTACATCCAGCCAGCTTGGGCTTATAATGGTAACCATTGGTCTAAACC  
AACCACAACCTAGCATTTCTTCACATCTGTACACATGCCTTCTTCAAGGCCATACTGTT  
TTTATGCTCCGGATCTATTATCCACAGCCTAAATGATGAACAAGATATCCGCAAAAT  
AGGGGGCATAACCCACCTTGCACCTTTTACATCCTCTTGCCTAACTATTGGCAGCCT  
CGCCCTCACAGGAACCCCTTCTTGGCTGGCTTCTTCTCTAAAGATGCCATCATCGA  
AGCATTGAACACATCCCACCTAAACGCCTGAGCCCTAACCTTAACCTCCTAGCCAC  
CTCTTTCACAGCAATCTACAGCTTTCGAGTAGTATTTTTTGTACCCATGGGGCCACCCC  
CGATTTAGTCCCTCTCTCCGATCAACGAAAACAACCCAGCAGTAATTAACCCACTTA  
AGCGACTAGCATGGGGAAGTATCGTTGCAGGCTTACTAATTACCTCTAATATTACAC  
CCTTAAAAACCCCTGTCATATCTATGCCTCCTCTCCTTAAACTAGCTGCTCTTGCAGT  
TACAATCATCGGCCTTCTTGTGCTATAGAGCTCGCCATATTAACCAACAAGCAATA  
TGAGCCAATACCCGGCACGACATACACCACTTCTCTGCCTTATTAGGCTTCTTCCCC  
GGGGTCATACACCGCCTAACCCCTGTATTGCTCTTCTTCCTAGGCCAAAACATTGCT  
AACCAAAACAGTAGATCAGACATGATTAGAAAAAACAGGCCCCAAAGCCATTGAATC  
CGCTAACCGACCTCTAGTGTCTCTACAAGTAATATTCAACGGGGGGGTGATCAAAAC  
ATATCTTCCCTCTTCCTCCTAACACTAGCCCTTATAATCCCCATATTCATCACCTAAT  
GACTTTCGCTATATATTTAGTTTTATTTTCTCTTGTGTTGGGGTTAGTTGCAGTTGCTT  
CTAATCCGTCCCCTTATTTTGCTGCTTTGGGTTTGGTTGTGGTAGCTGGCATGGGGTG  
TGGTATATTAGTTGGGCATGGAGGGGCCCTTTTTGTCACTAGTCCTGTTCTTAATTTAC  
TTAGGCGGGATGTTAGTTGTATTTGCATATTCAGCAGCGTTAGCTGCTGAGCCGTAC

CCAGAGAGCTGGGGTAGTTGGTTCGGTAATGGTCTACGGTTGTCTATACAGGAGGAG  
TATTATAGTTTCTGGATTGTTTTGAGGGGGGTGGTATGAATCTTCTTGGGTCTTAGCA  
GATGAGTTGGGGGAGTTTTCCGTATTTTCGAGGGGATATCGGAGGGGTAGCCTTAATA  
TACTCTTCTGGGGGGTGGTTGTTAATCACTAGTGCATGGGTATTGCTCTTAACCTTTGT  
TTGTAGTCCTTGAGTTAACCGGGGTATGAGCCGAGGGGCGTTGCGACGGTTT"/>

<sequence id="seq\_Limanda\_aspera\_KP013094" spec="Sequence"  
taxon="Limanda\_aspera\_KP013094" totalcount="4"  
value="ATGATACTAAGCTTCTTTGATCAATTTATGTCCCCCGTATTCCTGGGCATCCC  
CCTAATTGCCCTGGCAATTACACTGCCCTGAACGCTGTTCCCAGCCCCTGTCTTCGCT  
GACTAAATAATCGTATAGTTTCACTTCAAGGATGATTCATTAGCGGCTTCACATCTC  
AACTTCTCCTCCCACTAAACCCAGCCGGACACAAGTGAGCCATTTTATTTGCCTCAT  
TAATCTTTTCTTTTTCTATTAACATGCTCGGACTCCTTCCATACACATTTACACCTAC  
AACTCAACTCTCCCTTAACCTCGGCCTCGCAGTTCCACTCTGATTGGCAACTGTCATT  
ATGGCATGCGAAACCAGCCAACAGTCGCCCTAGGCCACCTTCTTCCAGAAGGGACC  
CCCACTCTTCTTATCCCAGTACTAATTATTATCGAAACAATTAGCCTGTTTATTCGAC  
CTCTCGCTCTTGGTGTTCGACTTACAGCAAATCTTACAGCTGGCCACCTGCTCATTCA  
ACTCATTGCAACAGCTGCCTTTGTTCTTCTTCCGCTTATGCCTGTCGTTGCTATTTTAA  
CAGCAACAGTTCTTCTCCTAACTCTCCTAGAAAGTTGCCGTTGCTATAATTCAAGC  
CTACGTCTTTGTTTTACTCCTAAGTCTTTACCTACAAGAAAACGTCTAATGCCTCAAC  
TGGACCCCGCACCCCTGATTTGCAATTTTGGTTTTCTCTTGAATAATCCTTTTAACTGT  
TATTCCCCCAAAAGTTTTAGCTCACACCTACCCCAATGAGCCAACCTCCCAAAGCAC  
ACAAAAACAAAACAGAGCCCTGAAACTGACCATGATACTAAGTGGCAATCACACGT  
TGATTTTTCTCGACCAATCACAAAGACATCGGCACCCCTCTATCTCGTATTTGGTGCCT  
GAGCCGGAATAGTGGGGACAGGTCTAAGTCTGCTCATTGAGCAGAACTCAGCCAA  
CCTGGGGCTCTCCTGGGAGACGATCAAATTTATAACGTGATCGTTACCGCACACGCC  
TTTGTAATAATCTTCTTTATAGTAATACCAATTATGATCGGAGGGTTCGGAAACTGA  
CTTATCCCCTAATGATCGGGGCCCTGATATGGCATTCCCTCGAATGAACAACATG  
AGTTTCTGACTTCTGCCTCCATCCTTTCTTCTCCTCCTAGCCTCTTCAGGCGTAGAAG  
CCGGGGCTGGAAGTGGGTGAACTGTATATCCTCCGTTAGCTGGAAATCTAGCACACG  
CTGGAGCATCCGTAGACCTAACAATCTTTTCTTTCACCTTGCCGGGATTTTCATCAAT  
CCTGGGAGCAATCAACTTTATTACCACAATCATCAACATGAAACCTACAGCAGTAAC  
TATGTACCAAATTCCTACTATTCGTGTGAGCCGTAATAATTACAGCCGTTCTTCTCCTC  
CTCTCCCTTCCAGTCTTAGCCGCTGGCATCACAATGCTACTGACAGACCGCAACCTA  
AACACAACCTTTCTTTGACCCTGCCGGAGGGGGTGACCCCATCCTCTATCAACACCTA  
TTCTGATTCTTTGGCCACCCAGAGGTATATATTTTAACTTCTTCCAGGCTTCGGGATAA  
TTTCTCACATTGTTGCATATTATGCAGGTAAGAAAGAACCCTTTGGCTATATAGGAA  
TAGTCTGAGCTATGATGGCTATTGGACTCCTGGGCTTCATCGTATGGGCTCATCACA  
TGTTTACAGTTGGAATAGACGTGGACACACGAGCCTACTTTACTTCTGCCACAATGA  
TTATCGCCATCCCAACTGGCGTAAAAGTCTTTAGCTGACTCGCAACCCTCCACGGAG  
GAAGCATTAAGTGAGAAACCCCACTTCTGTGAGCCCTAGGCTTTATTTTCCTGTTCA  
CAGTAGGAGGTCTTACTGGTATTGTCTTAGCTAATTCCTCTCTCGACATCGTCCTCCA  
TGACACATACTATGTAGTAGCCCACTTCCACTATGTACTATCCATGGGTGCTGTGTTT  
GCAATCGTTGCCGCCTTCGTACACTGATTCCCCCTATTTACAGGCTACACCCTCCACT  
CCGCATGAACAAAAATTCACCTTGGCCTCATGTTTGTAGGTGTAAATCTCACATTCTT  
CCCCAACATTTTCCTTGGCCTTGCCGGAATACCTCGACGGTACTCGGACTACCCAGA  
TGCATATACCCTTTGAAATACTGTCTCATCAATCGGATCACTAATGTCCCTCGTTGCT  
GTGATTTTATTTTTGTTTATTATTTGAGAAGCATTACAGCCAAACGAGAAGTCGGG  
GCAGTAGAACTAACTTCAACTAATATCGAATGACTCTACGGCTGCCCCCACCCTAT

CACACATTTGAGGAGCCCGCATTCGTCCAAGTTCGTATAAACTAAATGGCACATCCG  
TCACAAC TGGGGTTTCAGGACGCAGCTTCCCCCTAATAGAAGAACTACTTCACTTC  
CATGATCACGCCTTAATAATTGTTATTCTCATCAGCGCAATAGTGCTTTATATTATTG  
TGGCAATGGTCACGGCCAACTAACCGACAAGCTTGTCTTAGACTCCCAAGAAATT  
GAAGTAATCTGGACAGTTCTCCAGCTATTATCCTAATTCTCATCGCCCTCCCGTCTC  
TCCGCATTTTATACCTGATAGACGAAATTAACGACCCCCATCTAACCATCAAAGCAT  
TAGGTCACCAATGATACTGAAGCTACGAATACACAGACTACCAAGACCTTGGTTTTG  
ACTCTTATATAATCCCAACACAAGACCTGACCCCTGGGCAGTTCCGACTACTTGAAG  
CAGATCACCGAATGGTGATTCTGTGAATCCCAATTCGAGTCCTTATTTCACTG  
AAGATGTTTTACATTCCTGAGCAGTCCCCTCCCTGGGCGTAAAAGTTGATGCTGTAC  
CTGGCCGATTAAACCAAGCAACCTTTATTGTTAGCCGACCTGGCGTATTCTACGGCC  
AATGCTCTGAGATTTGCGGGGCAAACCACAGTTTTATACCCGTCGTTGTAGAAGCAG  
TCCCACTTGACCACTTTGAGAAGTGGTCTTCGCTAATAATTGAAGACGCCTATGGCC  
CCTCAAGCGCACCCGTACCACATAGTCGACCCTAGCCCATGACCCCTCACGGGGGCT  
ATCGCTGCCCTATTGATAACATCTGGCCTTGCTATCTGATTCCACTTCCACTCTACCA  
CCCTAATAACTATTGGAACAGTCCTTCTTATTCTAACAGTCTTCCAGTGATGACGAG  
ATGTCGTTTCGAGAAGGTACATTCCAAGGACACCATACCCCTCCCGTTCAAAAAGGCC  
TCCGATACGGTATGATCTTATTTATTACCTCAGAAGTCCTATTTTTCTTAGGCTTCTT  
CTGGGCTTTTTATCACTCAAGCCTCGCACCTACGCCTGAACTAGGAGGTTTCTGACC  
ACCCGCAGGCATCACACCTTTAGACCCATTTGAAGTCCCGCTTCTAAATACAGCAGT  
CCTACTTGCCCTCTGGCGTAACTGTTACATGGGCACATCACAGTATTATAGAAGGCGA  
ACGAAAACAAGCTATCCAATCTCTTGCTCTCACAATTTTACTCGGTGGCTACTTTACC  
TTCCTCCAAGGCCTTGAATATCACGAAGCCCCCTTCACCATTGCAGACGGAGTTTAT  
GGTGCCACATTCTTTGTTGCTACCGGCTTCCACGGACTTCACGTCTTAGTGGGCTCCT  
CTTTCTTAGCCGTTTGTTTATTACGCCAAATTCTGCACCACTTTACATCCGACCACCA  
TTTTGGCTTCGAGGCAGCCGCATGATACTGACACTTTGTAGACGTCGCTGACTCTTC  
CTCTATATCTCTATTTACTGATGAGGATCTTAATGGCCAATCTCCGTAAATCCCACCC  
CCTCCTTAAATCGCAAACGATGCTCTAGTAGACCTCCCAGCCCCCGCAAACATCTC  
TGTCTGATGAACTTCGGGTCTCTTTTAGGACTCTGCTTAGTAACCCAGATCGCTACC  
GGCTTATTCTTAGCCATACACTACACATCAGATATTGCTACTGCCTTTACCTCCGTCG  
CACACATCTGCCGGGACGTCAACTACGGCTGACTTATCCGAAGCATTCATGCCAATG  
GAGCATCATTCTTTTTCATTTGCATCTACCTTCATATTGGCCGTGGTCTCTACTATGG  
TTCTTACCTCTATAAAGAAACGTGAACTATTGGTGTTGTTCTTCTACTTCTCGTAATG  
ATGACCGCCTTCGTTGGTTACGTACTTCCTTGAGGACAAATGTCCTTTTGAGGTGCA  
ACCGTCATTACCAACCTTTTATCCGCAGTCCCCTACGTTGGGGGGCTCCCTTGTCCAAT  
GAATCTGAGGTGGCTTTTCTGTAGATAATGCAACCCTTACCCGATTCTTTGCATTCCA  
CTTCCTTTTCCCGTTCATTATCGCAGCCGCCACAGTAATTCATCTCCTCTTCCTCCAC  
GAAACCGGTTCAAACAACCCACCGGTTTAACTCAAACCTCCGATAAAGTCCCATT  
CACCTTACTTCACATACAAAGACCTTTTGGCTTTGCAGTCCTTCTTACTGCCCTAGC  
TTCCCTCGCCCTCTTCTCCCCCAACCTTTTAGGAGACCCGGACAACCTTACCCCTGCA  
AACCCTTGTACACCCCCACATATCAAGCCCGAATGATATTCCTGTTTGCCTAC  
GCCATTCTCCGTTCCATTCCAAACAACTTGGAGGTGTTCTTGCCCTCTTATTCTCCA  
TCCTAGTTCTCATACTTGTCCCTTTCTCCACACCTCCAAACAACGGAGCCTTATGTT  
CCGCCCTGTAACACAGTTTCTGTTTTGGTCTTTAGTAGCTGACGTAATAATTCTGACT  
TGAATTGGAGGAATACCCGTTGAGCACCTTTCGTTATCATTGGCCAAGTAGCATCT  
ATTATCTACTTCTCGCTCTTCCTAGTCCTTATCCCAACAGCAGGATGAATAGAAAAC  
AAAGTCCTCGGATGAACTATGATTTCAACCCTCATTACGCATATTATTAACCCACT  
AGCCTTTATTGTCCCCGTCTTGTTAGCCGTAGCATTCTCTTGAACGAAAG



GTGCTAGGTTATATACAACCTCCGAAAAGGTCCCAATATCGTTGGGCCTTACGGCCTC  
CTTCAACCTATTGCTGACGGCGTAAAACCTCTTCATTAAGGAACCCGTTTCGCCCTTCA  
ACCTCCTCACCAGTTTTATTCTTTTTGTACCCATACTTGGCCTAACGCTAGCCCTTG  
CACTTTGAGCCCCCATGCCTTTTCCATACCCTGTTGTGGACCTCAACCTGGGGATTTT  
ATTTATTCTAGCCTTGTCTAGCCTTGCAGTATACTCCATCCTCGGATCAGGCTGAGCA  
TCCAATTGGAAGTATGCATTAATAGGAGCACTACGTGCTGTTGCACAAACAATTTCT  
TACGAGGTCAGCCTCGGACTCATCTTACTTAGCATCATTATCTTTGCAGGAGGGTTT  
ACACTCCAAACCTTTAACACAGCCCAAGAGGCCATTTGACTCGTAGTGCCCGCCTGA  
CCACTGGCTGCCATATGATACATCTCCACCCTTGCCGAAACAAACCGTGCACCATTG  
GACCTGACCGAGGGGGAATCTGAACTTGTCTCAGGCTTCAACGTAGAGTACGCAGG  
TGGACCCTTCGCTTTATTCTTTTTAGCCGAATATTCAAACATCCTCCTAATAAACACA  
CTGTCCGCAACACTATTTTTGGGCGCCTCGCACATTCCAAACATCCCAGAATTAACA  
AGCATCAACTTAATAACTAAAGCCGCCCTTCTCTCAGTTGTTTTTCTCTGGGTCCGAG  
CTTCGTACCCGCGGTTCCGTTATGACCAGCTTATACACCTCATTTGAAAAAATTTTCT  
TCCACTAACGCTGGCGCTGGTTATTTGACACTTAGCGCTCCCTATTGCATTTCGCTGGC  
CTCCACCTCAGCTGTAGATGAACCCCTACATCTTGACCACCCTTCTATTTGGTTTGG  
GCCTAGGTACAACACTGACATTTGCAAGCTCCCACTGACTTCTCGCGTGAATAGGCC  
TTGAAATTAATACTAGCCATTATTCCACTAATAGCCCAACACCACCACCCTCGGG  
CGGTTGAAGCCACTACTAAATACTTCCTGGCACAAGCCACAGCAGCGGCCACCCTCC  
TGTTTGCAAGCACCACCAACGCCTGAATTACCGGACAATGAGATGTTCAACAGATA  
ACACATCCGCTCCCCACAACAATAGTTGTGATCGCCCTAGCACTAAAAATTGGACTA  
GCCCCTATACACTCCTGACTCCCCGAAGTTCTTCAGGGCCTAAGCCTCACCACAGGT  
CTTATTTTATCAACCTGACAGAAGCTTGCACCTTTTGCTCTTCTATTACAAATTCAAA  
CGACAATCCTACGCCTCTAATCATTATTGGCCTTCTCTCTGCCCTTGTAGGGGGCTGA  
GGTGGTCTCAACCAAACACAGCTGCGCAAAGTTCTTGCCCTACTCCTCAATCGCCAC  
CTTGGTTGAATAATACTTATCCTTCAATTTTCTCCACTCCTGAGCCTCCTTGCCTGC  
TGACATATTTTCTATGACCTTTTCAGCTTTCCTCATCTTCAAAGTAAACAAGGCCACT  
ACTGTTAATGCACTCGCCATCTCTTGGGCAAAAACCTCCGGCCCTCACAGCCCTAGCA  
CCCCTTGTTTTACTTTCCCTCGGGGGCCTTCCCCCACTTACCGGCTTTATACCAAAGT  
GGTTTATTCTTCAAGAACTTACCAAACAAGATTTACCACACTAGCTACTCTCGCTGC  
ACTAACTGCCCTCTTGAGCCTCTACTTCTACCTACGTCTCTCGTATGCTATGACCCTA  
ACGATATTTCCCAATAACCTCATTGGCATGACCCCTGACGATTCTCAACTCCCCAA  
TTTACCCTTCCCCTCGCCGTTTCCACTGCGGCGACCACCCTCCTCCTGCCATTGGCAC  
CTGCTGCCGTAGCACTCCTCGTCACCTATGAGCCTTCTTCTAACCATCATTTCATCA  
CCGCCCTCCTATCAACGGTACTTGCCATTGTGTCTTTTTGACTTCCCCAAATTACGCC  
GGATTATGAAAAGCTGTCACCGTACGAGTGTGGCTTTGACCCCAATTGGTTCCGCCCCG  
ACTACCCTTCTCGATGCGATTTTTTCTCATCGCCATCCTCTTTCTTCTGTTCGACTTAG  
AAATTGCACTTCTCCTCCCGCTCCCCTGAGGCGACCAACTAGCGTCCCCTCTACTTAC  
ATTTACCTGAGCTGCAGCAGTTCTATCGCTCCTAACCCTTGGCCTCATCTACGAATG  
AGTACAAGGAGGCCTAGAATGGGCTGAATATGCTAAAAATTCTAATTCCAACACTT  
ATGCTAATCCCAACAGCCTGACTACTTAAACCTAGCTGGCTCTGGCCCATAACCTTA  
TTGTATAGCTTTTGCATCTCCTTAATTAGCCTCTCGTGACTAAAAAACCTCTCGGAAA  
CCGGCTGATCCTCACTCAACCTATTTATAGCCACCGACTCTTTATCAACCCCCCTCCT  
TGTCCTGACATGTTGGCTACTTCCGCTAATAATCTTAGCAAGCCAAAAACACACGGC  
CTCAGAGCCGCTCAGTCGGCAGCGCATGTATATTTGCTTCTCGCCTCCTTCAATTTT  
TCCTGATTCTAGCATTTAGCGCCACAGAGCTGGTGATGTTTTACGTAATATTTGAAG  
CTACCCTTATCCCGACACTGATCATTATCACTCGCTGAGGGAACCAAACAGAGCGCC  
TAAATGCGGGAACCTACTTCCTGTTCTATACCCTGGCTGGCTCACTTCCTCTTCTGT

TGCCTTGCTGCTACTCCAAAACACATCCGGA ACTCTCTCATTATTAACGCTCCACTAC  
ACGGACCCGCTCGCTGTCCTCCTATGCAGACAAATTATGATGAGCCGGATGTCTTCT  
AGCTTTCCTAGTTAAAATGCCACTTTATGGCGTTCACCTCTGACTTCCCAAAGCACAT  
GTTGAAGCCCCAATTGCAGGCTCAATAATCCTTGCAGCAGTTTTACTTAAGCTAGGA  
GGCTACGGCATAATCCGTATAATAACAATACTAGAGCCTCTAACCAAAGAATTAAG  
CTACCCCTTTATTATCTTTGCACTCTGAGGCGTAATCATGACCGGCTCAATTTGCCTA  
CGACAAACGGACCTTAAGTCATTAATTGCCTACTCCTCTGTTAGTCACATGGGCCTC  
GTGGCCGGAGGGATTCTCATTCAATCACCTGAGGGCTCACGGGTGCACTTACACTT  
ATAATCGCCCACGGCCTCACCTCCTCAGCCCTATTTTGCCTAGCAAATACAAACTAT  
GAACGAACACACAGCCGTACAATAGTATTAGCACGAGGACTTCAAGTGGCCTTACC  
CCTAATGGCCACTTGATGATTTGTCTCCAGCCTAGCCAACCTGGCCCTGCCCCCACT  
GCCTAACCTTATGGGGGAGCTGATGATTATCACCTCCCTTTTTGACTGGTCCTGATG  
AACACTGGCACTTACAGGGTCCGGGACTCTTATTACCGCTGGCTACAGCCTCTATAT  
ATTCTTAATGACTCAACGAGGTCCTCTCCCAACACATGTAATTGCACTTGAACCCTC  
ACACACCCGAGAACATCTTCTTATTGCCTTCACCTCATCCCTCTTGTTCTCCTCGTTC  
TTAAGCCCGAGCTGATCTGAGGCTGAACTGCCTATGACCCCTACACACTTTGCCTTC  
TCCTCAGCCTTTTTTCTAGGTTTAACAGGCCTGGCATTCCACCGGTCCCACCTCCTTT  
CCGCACTATTGTGCCTTGAAGGGATGATACTGTCCCTTTTTGTTGGCCTCTCCCTGTG  
AACTCTACA ACTAGACTCAACTAACTTTTCAGCATCTCCATTACTCCTGCTTGCGTTT  
TCAGCCTGTGAAGCAAGCGCCGGGCTCGCCCTTCTAGTAGCCACTGCCCCGAACCCAC  
GGA ACTGACCGACTGCAAAGCCTAAACCTCCTCCAATGCTAAATGCACCCACCTCC  
CTAATGATCTCATCAAGCTTGATTACAATCTTTGCATTACTAGCCTACCCACTGGCCA  
CCACATTCCGTCCTACGCCTCAGGGGCCTCAATGAGCCACATCTCATGTCAAAACAG  
CTGTAAAAATAGCTTTCTTTGTTAGCCTCTTACCCCTTGCCCTGTTCTTAATGAAGG  
TGCCGAGACAATTGTTACTAACTGGGCCTGAATGAACACTAACACCTTTAACATCAA  
CATCAGCCTAAAATTTGACTTTTACTCGATTATCTTTACTCCTATTGCCCTCTACGTT  
ACTTGGTCCATTCTAGAGTTCGCATCATGATACATACACGCTGACCCACACGTAAAC  
CGCTTTTTCAAGTACCTTTTAACGTTTCTTATTGCTATAATTATCCTAGTAACTGCAA  
ACAACATATTTCAACTCTTTATCGGGTGAGAGGGCGTAGGGATCATATCGTTCCTCC  
TCATTGGATGATGGTACGGACGGGCGGATGCTAATACTGCAGCACTTCAAGCAGTA  
CTGTACAACCGGGTCGGGGACATCGGACTCATCTTCGCCATAGCTTGAATAGCAACA  
AACCTAAACTCCTGGGAAATACAACAAATCTTTGCGACCTCTAAGGGTATGGACTTA  
ACCTACCCCTCATTGGACTAATCATCGCGGCAACCGGGAAATCAGCTCAATTTGGG  
CTCCACCCTTGGCTGCCCTCAGCCATGGAAGGTCCTACACCGGTATCTGCCCTACTT  
CATTCTAGCACTATAGTCGTGGCCGGCATCTTTCTCCTGGTACGAATGAGCCCACTT  
CTGGAGAATAACCCGGCTGCCCTCACAACCTGCCTCTGTCTCGGGGCCCTTACGACC  
CTGTTCACTGCAACCTGCGCCCTCACACAAAATGATATTA AAAAAAATCGTCGCATTT  
TCTACATCTAGTCAGCTCGGGCTCATAATGGTAACCATTTGGGTAAACCAACCTCAA  
CTAGCATTTCTACACATCTGTACACACGCCTTCTTTAAAGCCATACTATTTCTTTGCT  
CGGGGTCTATTATTCACAGCCTAAACGATGAACAGGACATCCGAAAAATAGGCGGT  
ATGCACCACCTTGCACCTTTTACATCCTCTTGCTTGACAATTGGAAGCCTCGCACTTA  
CGGGA ACTCCCTTCTTAGCTGGTTTCTTCTCTAAAGATGCCATCATCGAAGCATTA  
ACACATCCCATTTAACGCCTGAGCCCTAACCTAACCTCCTGGCCACATCTTTTA  
CAGCAATCTACAGCTTCCGCGTAATTTTCTTTGTGCCTATGGGCCACCCCCGATTAA  
TCCATTTCCCCTATTAACGAAAATAACCCCGCAGTGATTAATCCACTTAAACGCCTA  
GCATGAGGAAGTATCCTTGCAGGACTACTAATTACCTCAAATATTACACCCCTTAAA  
ACCCCGTGATGTCCATGCCTCCCCTCCTAAACTAGCTGCCCTTGCAGTTACAATT  
ATCGGCCTACTTATTGCCATAGAACTCGCTATATTAACCAACAAGCAATTTAAATCA

ACACCTGTCTTAACGTACACAACCTTCTCTAATATACTAGGCTTTTTTCCCCGCCATTGT  
ACACCGCCTAACCCCTAAATTAGGGCTCGTTTTTCGGCCAGGACATTGCTAACCAGAT  
AGTGGATCAAACCTGACTAGAAAAGGTAGGCCCCAAAGCCATTGTATCCTTCAACC  
AACCATTAGTCTCTACGACAAGTAATATTCAACGAGGAATAATCAAGACCTATTTAC  
CCTTTTCCTTCTAACACTAGCCCTTATTGTGCGCAATGACCCTCGCACAATGGCTTTTG  
TTATATATTTTATTTTATTTTCTTCGTGCTGGGGTTAGTTGCAGTTGCTTCTAATCCG  
TCGCCCTACTATGCTGCTTACGGCTTAGTTGTGGTAGCCGGGATGGGGTGTAGTGTA  
TTAATTGGGCATGGGGCGCCCTTCTATCTATAATTCTTTTCCTAATTTACTTGGGGG  
GAATGCTAGTTGTATTTGCATTTGCAGTAGCAATAGCTTCTGAGCCGCACCCAGTCG  
GCTGGAATTCTTGGGCTGTATTGGGCTACGCTTGTCTACATGGCAGCAGTAGCGTAG  
TTGCTGGGGCGCTTTGAGGGGGATGATATGAATCGTCTTGAGCTACAGTAGATGGTT  
TTGCGGAGACGGGGGTGTTTCGGGGTGACCTGGGCGGGGTAGCCATGATTTATGGTT  
CTGGGGGAGGGCTGTAGTTATCAGTGCGGGGGTATTGCTTTTAACGCTGCTTGTAG  
TCCTTGAGTTAGCCGGCCCATGTGCCGAGGGTCATTGCGACAATAA"/>

<sequence id="seq\_Limanda\_limanda\_MN122886" spec="Sequence"  
taxon="Limanda\_limanda\_MN122886" totalcount="4"  
value="ATGATACTAAGCTTCTTTGATCAATTTATGTCCCCCGTATTCCTGGGCATTCC  
CCTAATTGCCCTGGCAATTACACTGCCCTGAACGCTGTTCCCAGCCCCTGTCTTCGCT  
GACTAAATAATCGTATAGTTTCACTTCAAGGATGATTTCATTAGCGGCTTCACATCTC  
AACTTCTTCTCCCACTAAACCCAGCCGGACACAAGTGAGCCATTTTATTTGCCTCATT  
AATCTTTTCTATTTCTATTAATATGCTCGGACTTCTTCCGTACACATTTACACCTACA  
ACTCAACTCTCCCTTAACCTCGGCCTCGCAGTTCCACTCTGACTGGCAACTGTCATTA  
TGGTATGCGAAACCAACCAACAGTCGCCCTAGGCCACCTTCTTCCAGAAGGGACCC  
CCACACTTCTTATCCCAGTACTAATTATTATCGAAACAATTAGCCTGTTTATTCGACC  
TCTCGCTCTTGGTGTTTCGACTTACAGCAAATCTTACAGCTGGCCACCTGCTCATTCAA  
CTCATTGCAACAGCTGCCTTTGTTCTTCTTCCGCTTATGCCTGTCGTTGCTATTTTAAC  
AGCAACAGTTCTCTTCCTCCTAACCCTCCTAGAAGTTGCCGTTGCTATAATTCAAGCC  
TACGTCTTTGTTTTACTCTTAAGTCTTTACCTACAAGAAAACGTCTAATGCCTCAACT  
GGACCCCGCACCCCTGATTTGCAATTTTGGTTTTCTTCTTGAATAATCCTTTTAACTGTT  
ATTCCCCCAAAGTTTTAGCTCACACCTACCCCAATGAGCCAACCTCCCAAAGCACA  
CAAAAACAAAACAGAACCCCTGAAACTGACCATGATACTAAGTGGCAATCACACGTT  
GATTTTTCTCGACCAATCACAAAGACATCGGCACCCTCTATCTCGTATTTGGTGCCTG  
AGCCGGAATAGTGGGGACAGGTCTAAGTCTGCTCATTTCGGGCAGAACTTAGCCAAC  
CTGGGGCTCTCCTGGGAGACGATCAAATTTATAACGTAATCGTTACCGCACACGCCT  
TTGTAATAATCTTCTTTATAGTAATACCAATTATGATCGGAGGGTTCGGAAACTGAC  
TTATCCCCTAATGATCGGGGGCCCTGATATGGCATTCCCTCGGATGAACAACATGA  
GTTTCTGACTTCTACCTCCATCGTTTCTTCTTCTCCTAGCCTCTTCAGGCGTAGAAGC  
CGGGGCTGGAACCTGGGTGAACTGTATACCCTCCGTTAGCTGGAAATCTAGCACACG  
CTGGAGCATCCGTAGACCTAACAACTTCTCTCTTCACCTTGCCGGGATTTTCATCAAT  
CCTGGGAGCAATCAACTTTATTACCACAATCATCAACATGAAACCTACGGCAGTAAC  
TATGTACCAAATTCCTACTATTCGTGTGAGCCGTGCTAATTACAGCCGTTCTTCTCCTC  
CTCTCCCTTCCGGTCTTAGCCGCTGGCATCACAAATGCTACTGACAGACCGCAACCTA  
AACACAACCTTTCTTTGACCCTGCCGGAGGGGGTGACCCCATCCTCTATCAACACCTA  
TTCTGATTCTTTGGCCACCCAGAGGTATATATTTTAATTCTTCCAGGCTTCGGAATAA  
TTTCTCACATTGTTGCATATTATGCAGGTAAGAAAGAACCGTTTGGCTACATAGGAA  
TAGTCTGAGCTATGATGGCTATTGGACTCCTGGGCTTCATCGTATGGGCTCATCACA  
TGTTTACAGTTGGAATAGACGTGGACACACGAGCCTACTTTACTTCTGCCACAATGA  
TTATCGCCATCCCAACTGGCGTAAAAGTCTTTAGCTGACTCGCAACCCTCCACGGAG

GAAGCATTAAGTGAGAAACCCCACTTCTGTGAGCCCTAGGCTTTATTTTCCTCTTCA  
CAGTAGGAGGTCTTACTGGTATTGTCTTAGCTAATTCCCTCTCTCGACATCGTCCTTCA  
TGACACATACTATGTAGTAGCCCACTTCCACTATGTACTTTCTATGGGTGCTGTATTT  
GCAATCGTTGCCGCCCTTTGTACACTGATTCCCCCTATTTACAGGCTACACCCTCCACT  
CCGCATGAACAAAAATTCACCTTTGGCCTTATGTTTGTGGGAGTTAATCTCACATTCTT  
CCCCAGCATTTTCTTGGCCTTGCCGGAATACCTCGACGGTACTCGGACTACCCAGA  
TGCATACACCCTATGAAATACTGTCTCATCAATCGGATCACTAATGTCCCTCGTTGCT  
GTGATTTTATTTTTGTTTATTATTTGAGAAGCATTTACAGCCAAGCGAGAAGTCGGG  
GCAGTAGAACTAACTTCACTAATATCGAATGACTTTACGGCTGCCCCCACCCTAT  
CACACATTTGAGGAGCCCGCATTCGTCCAAGTTCGTATAAACTAAATGGCACATCCG  
TCACAACCTGGGGTTTCAGGACGCAGCTTCCCCCTAATAGAAGAACTACTTCACTTC  
CATGATCACGCCTTAATAATTGTTATTCTCATCAGCGCAATAGTGCTTTATATTATTG  
TGGCAATGGTCACGGCCAACTAACCGACAAGCTTGTCTTAGACTCCCAAGAAATT  
GAAGTAATCTGGACAGTTCTCCAGCTATTATCCTAATTCTCATCGCCCTCCCGTCTC  
TCCGCATTTTATACCTGATAGACGAAATTAACGACCCCCATTTAACCATCAAAGCAT  
TAGGTCACCAGTGATACTGAAGCTACGAATACACAGACTACCAAGACCTTGGTTTTG  
ACTCTTATATAATCCCAACACAAGACCTGACCCCCGGGCAGTTCCGACTACTTGAAG  
CAGATCACCGAATGGTGATTCTGTAGAAATCCCAATTCGAGTCCTTATTTTCAGCTG  
AAGATGTTTTACATTCCTGAGCAGTCCCCTCCCTGGGCGTAAAAGTTGATGCTGTGC  
CTGGCCGATTAAACCAAGCAACCTTTATTGTTAGCCGACCCGGCGTATTCTACGGCC  
AATGCTCTGAGATTTGCGGGGCAAACCACAGTTTTATACCCGTCGTTGTAGAAGCAG  
TCCCCTTGACCCTTTGAGAACTGGTCTTCGCTAATAATTGAAGACGCCTATGGCC  
CCTCAAGCGCACCCGTACCACATAGTCGACCCTAGCCCATGACCCCTCACGGGGGCT  
ATCGCTGCCCTATTGATAACATCTGGCCTTGCTATCTGATTCCACTTCCACTCTACCA  
CCCTAATAACTATTGGGACAGTCCTTCTTATTCTAACAGTCTTCCAATGATGACGAG  
ATGTCGTTTCGAGAAGGTACATTCCAAGGGCACACACCCCTCCCGTTCAAAAAGGC  
CTCCGATATGGGATGATCTTATTTATTACCTCAGAGGTCCTATTTTTCTTAGGCTTCT  
TCTGGGCTTTTTATCACTCAAGCCTCGCACCTACCCCTGACCTAGGAGGTTTCTGACC  
ACCCGCAGGCATCACACCTTTAGACCCATTTGAAGTCCCACTTCTTAATACAGCAGT  
CCTACTTGCCTCTGGCGTAACTGTCACATGGGCACATCACAGTATTATAGAAGGCGA  
ACGAAAACAAGCTATCCAATCTCTTGCTCTCACAATTTTACTCGGTGGCTATTTTACC  
TTCTTCCAAGGCCTTGAATATCACGAAGCCCCCTTACCATTGCAGATGGAGTTTAT  
GGTGCCACATTCTTTGTTGCTACCGGCTTCCACGGACTTCACGTCTTAGTGGGCTCCT  
CTTTCTTAGCCGTTTGTTTATTACGCCAAATTCTACACCATTTTACATCCGACCACCA  
TTTTGGCTTCGAGGCAGCCGCGTGATACTGACACTTTGTAGACGTCGTCTGACTCTTC  
CTCTATATCTCTATTTACTGATGAGGATCTTAATGGCCAATCTCCGTAAATCCCACCC  
CCTTCTTAAAATCGCAAACGATGCTTTAGTAGACCTCCCAGCCCCCGCAAACATCTC  
TGTCTGATGAACTTCGGGTCTCTTTTAGGACTCTGCTTAGTAACCCAGATCGCTACC  
GGCTTATTCTTAGCCATACACTACACATCAGATATTGCTACTGCCTTTACCTCGGTGCG  
CACACATCTGCCGGGACGTCAACTACGGCTGACTTATCCGAAGCATTCATGCCAATG  
GAGCATCATTCTTTTTCATTTGCATCTACCTCCATATTGGCCGTGGTCTCTACTATGG  
TTCTTACCTTTATAAGGAAACATGAACTATTGGTGTTGTCTCCTACTTCTTGTAATG  
ATGACGGCTTTCGTTGGTTACGTACTTCCTTGAGGACAAATGTCCTTTTGAGGTGCA  
ACCGTCATTACCAACCTCCTTTCCGCAGTCCCCTACGTTGGGGGGCTCCCTCGTCCAAT  
GAATCTGAGGTGGCTTTTCTGTAGATAATGCAACCCTTACCCGATTCTTTGCATTCCA  
CTTCCTTTTCCCGTTCATTATCGCAGCCGCCACAGTAATTCATCTTCTCTTCCTTCACG  
AAACTGGTTCGAACAACCCACCGGTTTAAACTCAAACCTCCGATAAAGTCCCATTTTC  
ACCCTTACTTCACGTACAAAGACCTTTTGGCTTTGCAGTCCTTCTTACTGCTCTGGCC

TCCCTCGCCCTCTTCTCCCCAACCTTTTAGGAGACCCGGACAACCTTTACCCCTGCAA  
ACCCACTTGTTACACCCCCACATATCAAGCCCGAATGATATTTCTGTTCCTACGC  
CATTCTCCGTTCCATTCCAAACAACTTGGAGGAGTTCTTGCCCTCTTATTCTCCATC  
CTAGTTCTCATACTTGTCCCCTTTCTCCACACCTCCAAACAACGAAGCCTTATGTTCC  
GCCCTGTAACACAGTTTCTGTTCTGGTCTTTAGTAGCTGACGTAATAATTCTGACTTG  
AATTGGAGGAATACCCGTTGAGCACCTTTTCGTTATCATTGGCCAAGTAGCATCTCT  
TATCTACTTCTCGCTTTTCCTAGTCCTTATCCCGACAGCAGGATGAATAGAAAACAA  
AGTCCTCGGATGAACTATGATTTCAACCCTCATTACGCATATTATTAACCCACTAG  
CCTTTATTGTCCCCGTCTTGTTAGCCGTAGCATTCCCTGACTCTCCTTGAACGAAAGGT  
GCTAGGTTATATACAACCTCCGAAAAGGTCCTAACATCGTTGGACCTTACGGCCTCCT  
TCAACCTATTGCTGACGGCGTAAAACTCTTCATTAAAGAACCCGTTTCGCCCTTCGAC  
CTCCTCACCAGTTTTATTCTTTTATCACCCATACTAGCGCTAACGCTAGCCCTTGCA  
CTTTGAGCCCCCATACCTTTTCCATACCCTGTTGTGGACCTCAACCTGGGGATTTTAT  
TTATTCTAGCCTTGTCTAGCCTCGCAGTGTACTCCATCCTCGGGTCAGGCTGGGCATC  
TAATTCTGAAGTATGCATTAATAGGGGCGCTACGTGCTGTTGCACAAACAATTTCTTA  
CGAGGTCAGCCTCGGACTCATCTTACTTAGCATCATTATCTTTGCAGGAGGGTTTAC  
ACTCCAAACCTTTAACACAGCCCAAGAGGCCATTTGACTCGTAGTGCCCGCCTGACC  
ACTGGCTGCCATATGATACATCTCCACCCTTGCCGAAACAACCGTGCACCCTTCGA  
CCTGACGGAGGGGGAGTCTGAACTTGTCTCAGGCTTCAACGTAGAGTACGCAGGTG  
GACCCTTCGCTTTATTCTTTTTAGCCGAATATTCAAACATCCTCTTAATAAATACACT  
GTCCGCAACACTATTTTTGGGGCGCTCACACATTCCAAACATCCCAGAATTAACAAG  
CATCAACTTGATAACTAAGGCCGCCCTTCTCTCAGTTGTCTTTCTCTGAGTCCGAGCT  
TCGTACCCGCGGTTCCGTTATGACCAGCTTATACACCTCATTTGAAAAAATTTTCTTC  
CACTAACGCTGGCGCTGGTTATTTGACACTTAGCGCTCCCTATTGCATTCGCTGGCCT  
CCCACCTCAGCTGTAGATGAACCCCTACATCTTGACCACCCTTCTATTTGGTTTGGGC  
CTAGGTACAACACTGACATTTGCAAGCTCCCCTGACTTCTCGCGTGAATAGGCCTT  
GAAATTAATACTAGCCATTATTCCACTAATAGCCCAACACCACCACCCTCGGGCG  
GTTGAAGCCACTACTAAGTACTTCCTGGCACAAGCCACAGCAGCGGCCACCCTTCTG  
TTTGCAAGCACCACCAACGCCTGAATTACCGGACAATGGGATGTTCAACAAATAAC  
ACATCCGCTCCCCACAACAATAGTTGTGATCGCCCTAGCACTAAAAATTGGACTGGC  
TCCGATACACTCCTGGCTCCCCGAAGTTCTTCAGGGCCTAAACCTCACTACGGGTCT  
CATTTTGTGACCTGACAGAAGCTTGACACCTTTTGCTCTTCTACTACAAATTCAAACG  
ACAATCCTACGCCTCTAATCATTATTGGCCTTCTCTCTGCCCTTGTTGGCGGCTGAGG  
CGGTCTCAACCAAACCAACTGCGCAAAGTTCTTGCCCTACTCCTCAATCGCCACCT  
TGGTTGAATAATACTTATCCTTCAATTTTCACCACTCCTCAGCCTCCTTGCACCTCTG  
ACATATTTTCTATAACCTTTTCAGCTTTTCTCATCTTCAAAGTAAACAAGGCCACTAC  
TGTTAATGCACTCGCCATCTCTTGGGCAAAAACCTCCTGCCCTTACAGCCCTAGCACC  
CCTTGTTTTACTCTCCCTTGGGGGCTTCCCCCACTTACGGGCTTTATACCAAAGTGG  
TTTATTCTTCAGGAACCTTACCAAACAAGATTTACCACACTAGCTACTCTCGCTGCACT  
AACTGCCCTCTTGAGCCTCTACTTCTACCTACGTCTCTCGTATGCTATGACCCTAACC  
ATATTTCCCAATAACCTCATTGGCATGACCCCTGACGATTCTCAACTCCCCAGTTTA  
CTCTTCCCCTCGCCGTTTCCACTGCGGCAACCACCCTCCTCCTGCCATTGGCACCTGC  
TGCCGTAGCACTCCTCGTCACCTATGAGCCTTCTTCTAACCATCATTTCATTACCGC  
CCTCCTATCAACGGTACTTGCCATTGTGTCTTTTTGACTTCCCCAAATTACGCCGGAC  
TATGAAAAACTGTCACCATACGAGTGTGGCTTTGACCCCATTTGGTTCCGCCCCGACTA  
CCCTTCTCGATGCGATTTTTTCTCATCGCCATCCTTTTTCTTCTGTTTCGACTTAGAAAT  
TGCACTTCTCCTCCCCCTCCCGTGAGGCGACCAACTAGCATCCCCTCTACTTACATTT  
ACCTGAGCTGCAGCAGTTCTATCGCTCCTAACCTCGGCCTCATCTACGAATGAGTA

CAAGGAGGCCTAGAAATGGGCTGAATATGCTAAAAATTCTAATTCCAACACTTATGCT  
AATCCCAACAGCCTGACTACTTAAACCTAGCTGGCTCTGGCCCATAGCTTATTGTA  
TAGCTTTTGCATCTCCTTAATCAGCCTCTCGTGACTAAAAACCTCTCGGAAACCGG  
CTGATCCTCACTCAACCTATTTATAGCCACCGACTCTTATCAACCCCCCTCCTCGTC  
CTGACATGTTGGCTACTTCCGCTAATAATCTTAGCAAGCCAGAAACATACTGCCTCA  
GAGCCACTCAGTCGGCAGCGCATGTATATCTCGCTTCTCGCCTCCTTCAATTTTTCT  
GATTCTAGCATTTAGCGCCACAGAAGTGGTAATGTTTTACGTAATATTTGAAGCTAC  
CCTTATCCCGACGCTGATCATTATCACTCGCTGAGGAAACCAAACAGAGCGCCTAAA  
TGCGGGAACCTACTTCCTGTTCTATACCCTGGCTGGCTCACTTCCTCTTCTTGTTGCC  
TTGCTCCTACTCCAAAACACGTCCGGAAGTCTTTTATTGTTAACGCTCCACTACACG  
GACCCGCTCGCTGTCATCCTATGCGGACAAATTATGATGGGCCGGATGTCTTCTAGC  
TTTCCTAGTTAAAATGCCACTTTATGGCGTTCACCTCTGACTCCCCAAAGCACATGTT  
GAAGCCCCAATTGCAGGCTCAATGATCCTTGCAGCGGTTTTACTTAAAGCTAGGAGGC  
TATGGCATAATCCGTATAATAACAATACTAGAGCCTCTAACCAAAGAGTTAAGCTAC  
CCCTTTATTATCTTTGCACTCTGAGGCGTAATCATGACTGGCTCAATTTGCCTACGAC  
AAACGGATCTTAAGTCATTAATTGCCTACTCCTCTGTAGTCACATGGGTCTCGTAG  
CAGGAGGAATTCTCATCCAATCGCCCTGAGGACTCACGGGTGCACTCACACTTATAA  
TCGCCCACGGTCTTACCTCCTCAGCCCTATTTTGCCTGGCAAATACAACTATGAGC  
GAACACACAGCCGCACAATAGTATTAGCACGAGGACTCCAAGTGGCTTTACCCCTA  
ATAGCCACTTGATGATTTGTTTCCAGCCTAGCTAACCTGGCCCTGCCACCACTACCC  
AACCTTATGGGGGAGCTGATAATTATCACCTCCCTTTTTGACTGGTCCTGATGAACA  
CTAGCACTTACAGGGTCCGGGACTCTTATTACCGCTGGCTACAGCCTCTATATATTCT  
TAATGACTCAACGAGGCCCTCTCCCAACACATGTAATTGCACTTGAACCTCACACA  
CCCGAGAACATCTTCTTATTGCCTTCACCTCATCCCTCTTGTTCTCCTCGTTCTTAAGC  
CCGAGCTGATCTGAGGCTGAACTGCCTATGACCCCCACACACTTTGCCTTCTCCTCA  
GCCTTTTTTCTAGGTTTAACAGGCCTGGCATTCCACCGGTCCCACCTCCTTTCCGCAT  
TATTGTGCCTTGAAGGAATGATACTGTCCCTTTTTGTTGGCCTCTCCCTGTGAACTCT  
ACAAGTAGACTCAACTAACTTTTCAGCATCTCCATTACTCCTGCTTGCATTTTCAGCC  
TGTGAAGCAAGCGCCGGGCTCGCCCTTCTAGTAGCCACTGCCCCGAACCCACGGAAC  
TGACCGACTGCAAAGCCTAAACCTCCTCCAATGCTAAATGCACCCACCTCCCTAAT  
GATCTCATCAAGCTTGATTACAATCTTTGCATTACTAGCCTACCCACTGGCCACCAC  
ATTCCGTCCTGCGCCTCAGGGACCTCAATGAGCCACATCTCATGTCAAGACAGCTGT  
AAAAATAGCTTTCTTTGTCAGCCTCTTACCCCTTGCCCTGTTCTTAATGAAGGTGCC  
GAGACAATTGTTACTAACTGGGCCTGAATGAACACTAACACCTTTAACATCAACATT  
AGCCTAAAATTCGACTTTTACTCGATTATCTTCACTCCTATTGCCCTTTACGTTACTT  
GGTCCATTCTAGAATTCGCATCATGGTACATACACGCTGACCCACACGTAAACCGCT  
TTTTCAAGTACCTTCTAACGTTTCTTATTGCTATAATTATCCTAGTAACTGCAAACAA  
CATGTTTCAACTCTTTATCGGGTGAGAGGGCGTAGGGATCATATCGTTCCCTCCTCATT  
GGGTGGTGGTACGGACGGGCAGATGCTAATACTGCAGCACTTCAAGCAGTACTATA  
CAACCGGGTCGGAGACATCGGACTTATTTTCGCCATAGCTTGAATAGCAACAAACCT  
GAACTCCTGAGAAATACAACAAATCTTTGCGACCTCTAAGGATATGGACTTAACCTA  
CCCCCTCATTGGACTAATCATCGCAGCAACCGGGAAATCAGCTCAATTCGGGGCTCCA  
CCCTTGCTGCCCTCAGCCATGGAAGGTCTACACCGGTATCTGCCCTACTTCATTCT  
AGCACTATAGTCGTGGCCGGCATCTTTCTCCTGGTACGAATAAGCCCACTTCTGGAG  
AATAACCCGGTTGCCCTCACAACTGCCTCTGTCTCGGGGCCCTTACGACCCTGTTT  
ACTGCAACCTGCGCCCTCACACAAAATGACATTAATAAATCGTCGCATTTTCTACA  
TCTAGTCAGCTCGGGCTCATGATGGTAACCATTTGGTTTAAACCAACCTCAACTAGCA  
TTTCTACACATCTGTACACACGCCTTCTTTAAAGCCATACTATTTCTTTGTTTCGGGGT

CTATTATTCATAGCCTAAACGATGAGCAGGACATCCGAAAAATAGGGGGTATACAC  
CACCTTGACCTTTTACATCCTCTTGCTTGACAATTGGAAGCCTCGCACTTACGGGCA  
CCCCATTCTTAGCTGGTTTCTTCTCTAAAGATGCCATCATCGAAGCATTAAACACATC  
CCATTTAAACGCCTGAGCCCTAACCCTAACCCTCCTGGCCACATCTTTTACAGCAAT  
CTACAGCTTCCGGGTAATTTTCTTTGTGCCTATGGGGCCACCCCGATTTAATCCATTT  
CCCCCATTAACGAAAACAACCCCGCAGTAATTAACCCGCTTAAACGCCTAGCATGG  
GGAAGTATCCTTGCAGGACTACTAATTACCTCTAATATTACACCCCTTAAGACCCCC  
GTGATGTCTATGCCTCCCCTCCTAAAACCTAGCTGCCCTTGCAGTTACAATTGTCGGCC  
TACTTATTGCCATAGAACTCGCCATATTAACCTAACAAGCAATTTAAATCGACACCTG  
TCTTAACGTACACAACCTTCTCTAATATGTTGGGCTTTTTTCCCCGCCATTGTACACCGC  
CTAACCCTAAATTAGGGCTCGTTCTTGGCCAAGACATTGCTAACCAGATAGTAGAT  
CAAACCTGACTAGAGAAAGTAGGCCCCAAAGCCATTGTATCCTTCAACCAACCATT  
AGTCTCTACAACAAGTAATATTCAACGAGGAATAATCAAGACCTATTTACCCTTTTC  
CTTTTAACACTAGCCCTTATTGTGCAATGACCCTCGCACAAATGGCTTTTGTTATATA  
TTTTGTTTTATTTTTCTTCGTGCTGGGGTTAGTTGCAGTTGCTTCTAACCCGTCGCCCT  
ATTATGCTGCTTACGGCTTAGTTGTGGTAGCCGGGATGGGGTGTAGTGTGTTAATTG  
GGCATGGGGCGCCCTTTTTATCTATAATTCTTTTCTAATTTACTTGGGGGGAATGCT  
AGTTGTATTTGCATTTGCAGTAGCAATAGCTTCTGAGCCGCACCCAGTCGGCTGGAA  
TTCTTGGGCTGTATTGGGTTACGCTTGTTTACATGGCAGCGGTAGTGTAGTTGCTGG  
GGTGCTTTGAGGGGGATGATATGAATCGTCTTGAGCTACAGTAGATGGTTTTGTGGA  
GACGGGGGTGTTTCGGGGTGACCTGGGTGGGGTGGCCATGATTTATGGTTCCGGGG  
GAGGGCTGTAGTTATCAGTGCGGGGGTATTGCTTTTAACGCTGCTTGTAGTCCTTG  
AGTTAGCCGGCCCATGTGCCGAGGGTCATTGCGACAATAA"/>

<sequence id="seq\_Paralichthys\_olivaceus\_AB028664" spec="Sequence"  
taxon="Paralichthys\_olivaceus\_AB028664" totalcount="4"  
value="ATGATACTAAGCTTCTTTGATCAATTTATATCCCCGTATACCTGGGTATTCC  
CCTTATTGCACTTGCAATTATCTTACCATGAGCATTATTCCCACCCCTCTAGTCGAT  
GAATAAACAACCGACTGCTCACACTCCAAGGCTGATTTATTAACCGTTTTACCTCCC  
AACTCCTTCTTCCACTAAACCTCGGGGGCCACAAATGAGCGACCCTGTTTGCATCAC  
TCATATCTTCTTTTTCTATTAACATGCTTGGACTTCTCCCCTACACCTTTACACCCACA  
ACCCAGCTCTCATTAAATATGGGCCTCGCAGTCCCACTCTGACTCGCCACTGTCATT  
ATGGTATACGAAACCAACCCACACATGCATTAGGCCATCTATTGCCAGAAGGCACC  
CCTACAGCCCTGATCCCAGTTTTAATTATCATTGAAACAATTAGTCTGTTCATTTCGCC  
CTCTTGCCCTTGGTGTCCGACTCACAGCAAACCTGACGGCAGGTCACCTCCTAATTC  
AACTTATCGCTACAGCCGCCTTTGTTCTCCTCCCCATCATACCTATAATCGCGATTT  
AACAGCAACCCCTCCTCTTCTTCTTACACTCCTAGAGGTTGCAGTCGCAATAATTCA  
GGCCTATGTATTTGTCCTACTCTTAAGCCTCTACCTACAAGAAAACGTCTAATGCCC  
CAGCTTAACCCCGCACCTTGGTTTATAATCCTAGTTTTTTCTTGAATAGTGTTTTTGA  
CAATTATTCCCCCAAAGTCTTAGCCCATACTTCCCCAATGAACCCACCCACAAA  
GCACACAAAAACAAAACAGAATCCTGAAACTGACCATGATACTAAGTGGCAATCAC  
ACGTTGATTTTTCTCGACCAATCACAAAGACATCGGCACCCTCTATCTCGTATTTGGT  
GCCTGAGCCGGAATAGTGGGGACAGCCCTAAGCCTCCTCATTCGGGCAGAACTCAG  
CCAACCTGGTGCTCTCCTAGGGGACGACCAGATTTATAACGTAATCGTTACCGCACA  
CGCCTTTGTAATAATCTTTTTCATAGTTATACCAATTATGATTGGAGGCTTTGGCAAC  
TGACTTATCCCCCTGATAATCGGTGCCCCAGACATAGCATTCCCTCGAATAAATAAT  
ATAAGCTTCTGACTTCTACCCCTTCATTCTTCTTCTCCTGGCTTCTTCAGGTGTCTGA  
AGCTGGTGCCGGTACCGGGTGGACTGTCTACCCTCCCCTAGCTAGCAACCTCGCCCA  
TGCTGGAGCCTCAGTAGATCTAACCATCTTTTCACTACACCTTGCAGGTATTTTCATCA

ATTCTGGGAGCTATCAACTTCATTACTACCATTATTAACATGAAACCCACAACCTGTC  
ACAATATACCAAATTCCCCTGTTTGTCTGAGCCGTCCTAATTACGGCTGTCCTGCTGC  
TCCTCTCGCTGCCAGTTTTAGCCGCCGGTATTACAATACTGCTTACAGACCGAAACC  
TTAATACAACATTCTTTGACCCTGCAGGAGGAGGGGATCCAATCCTCTACCAACACC  
TGTTTTGATTCTTTGGCCACCCTGAAGTATATATTTTGATCCTCCCAGGCTTCGGTAT  
GATTTTCGCACATTGTTGCATACTACTCAGGGAAGAAAGAACCCTTCGGCTACATGGG  
TATGGTCTGAGCTATGATGGCTATCGGCCTTTTAGGTTTTATTGTGTGAGCCCACCAT  
ATGTTACAGTCGGTATGGACGTAGACACACGAGCTTACTTTACATCAGCAACAATA  
ATTATTGCGATCCCAACAGGTGTAAAAGTTTTTAGCTGATTAGCCACCCTTCACGGA  
GGGAACATTAAATGAGAAACACCCTACTATGAGCCCTCGGGTTCATCTTCCTTTTC  
ACAGTAGGGGGCCTGACCGGGATCGTACTAGCCAACTCCTCCCTAGACATCGTTCTT  
CATGACACATACTATGTAGTAGCCCACTTCCACTACGTCCTTTTCGATGGGGGCCGTC  
TTTGCCATCGTTGCTGCTTTCGTCCACTGATTCCCGCTATTTACAGGCTACACACTTC  
ACTCAACATGAACAAAAGTTCACTTCGGCGTAATATTTATTGGAGTAAACTTAACAT  
TCTTCCCCCAACATTTCTAGGTCTAGCCGGAATGCCCCGACGCTACTCTGACTACC  
CCGATGCCTATGCTCTCTGAAATACGGTCTCCTCAATTGGATCTCTAATGTCTCTCGT  
CGCTGTAATTATGTTCTTATTCAATTATTTGAGAAGCATTCTCAGCTAAACGAGAAGT  
CCTATCAGTCCTTATAACCGCAACAAACGTTGAGTGACTCCACGGCTGCCCTCCCC  
CTACCACACATTCGAGGAACCTGCATTTCGTTTCGAGCCCCATTAAACTAGATGGCCCA  
TCCCTCACAACCTCGGATTTCAAGACGCAGCTTCACCCCTAATAGAAGAACTACTTCA  
CTTCCACGATCACGCCTTAATAATTGTAATCCTCATCAGTACAATGGTACTTTATATT  
ATTGTTGCCATAGTCACAGCGAACTTACGGACAAACTTGTTCTAGACTCCCAAGAA  
ATTGAAATCATCTGAACAGTTCTCCAGCTATCATTCTTATTCTTATTGCCCTCCCAT  
CCCTTCGAATCTTGTACCTAATGGATGAAATCAACGACCCCCACCTCACAATCAAAG  
CCATAGGCCCATCAGTGGTACTGAAGCTATGAATACACAGATTATGAGGACCTCGGC  
TTCGACTCATATATAACCCCTACACAAGACCTTACACCCGGGCAATTTTCGGCTCCTT  
GAAGCCGATCATCGGATAGTGACCCCCGTTGAGTCCCCCATCCGAGTGCTTATTTCC  
GCTGAAGACGTATTACACTCTTGAGCAATCCCCGCTTTAGGTGTAAAAGTAGATGCT  
GTACCCGGCCGACTAAATCAAACAACTTTTATTATTAGCCGCCCAGGTGTGTTCTTC  
GGACAATGCTCTGAAATCTGCGGGGCTAATCACAGCTTCATACCAATCGTTGTAGAA  
GCAGTCCCCCTTCAGCACTTCGAAAACCTGGTCTTCGTTAATAATTGAAGAAGCCTAT  
GGCCCATCAAGCACACCCTTACCATATAGTTGACCCCAGCCCATGACCCCTCACGGG  
AGCTATCGCTGCACTTCTAATAACCTCCGGCCTTGCTATTTGATTCCACTTCCACTCT  
ACAACCCTAATAACACTTGGCACAATTCTTCTTATTTTAACCATCTTTCAGTGATGAC  
GCGATGTCGTTTCGAGAAGCCACATTCCAAGGCCATCACACCCCACCCGTACAAAAG  
GGTTTACGATACGGGATAATCCTGTTCATTACCTCGGAAGTCCTCTTCTTTTTAGGGT  
TCTTCTGGGCATTCTATCATGCAAGCCTAGCCCCCTACCCCTGAGTTGGGTGGTTTCTG  
ACCACCAGCAGGCATCACTCCTCTTGACCCATTTGAAGTCCCTTTACTTAATACAGC  
TGTTCTTCTTGCTTCCGGTGTAACAGTAACCTGAGCACATCACAGCATCATGGAGGG  
TAAACGGAAACAAGCCATTCACTCCCTTTTCTCACAATCCTTCTTGGGGGGCTACTTT  
ACGTTCTCCAAGCACTTGAATACCACGAAGCCCCCTTCACTATTGCAGATGGGGTT  
TATGGCGCCACATTCTTCGTTGCCACTGGTTTCCACGGACTTCATGTTCTAATCGGCT  
CGACGTTCTTGGCCGTCTGCCTCCTACGTCAGATTCTCCACCACTTTACGGCCAATCA  
CCATTTTGGGTTCGAAGCAGCCGCATGATACTGACACTTCGTAGACGTTGTATGACT  
GTTCTTTTATATCTCTATCTACTGATGAGGATCTTAATGGCCAGCCTACGAAAATCA  
CACCCCTTTTAAAAATCGCAAATGATGCATTAGTCGATTTACCAGCCCCCTCTAAT  
ATCTCTGTCTGATGAAACTTTGGGTCCCTCTTAGGACTATGTTTAATCACCCAGATTT  
TAACCGGCCTATTCTTAGCCATACACTACACCTCAGACATCGCAACTGCCTTCACTT



CCGTGGCCCACATCTGCCGGGACGTAAACTACGGTTGATTAATCCGAAACATCCACG  
CTAACGGGCGCATCATTCTTCTTTATCTGCATTTACCTCCACATCGGCCGAGGTCTATA  
CTACGGCTCTTTTCTGTATAAAGAAACATGAAATGTTGGCGTCATCCTGCTGCTTCTC  
GTAATGATGACCGCCTTTGTTGGTTACGTCCTTCCCTGAGGACAAATATCATTCTGG  
GGTGCCACTGTCATCACCAACCTACTCTCAGCCGTACCTTATGTCGGTAACACCCTA  
GTACAATGGATCTGAGGCGGATTTTCTGTAGATAATGCCACACTACCCGGTTCTTT  
GCATTCCACTTCCTATTCCCATTTGTCATCGCAGCCGCAACCGTAATCCACCTTATTT  
TCCTACACGAACTGGCTCCAACAACCCCACTGGATTGAATTCAGACTCAGACAAA  
GTCCCCCTTCCACCCATACTTCTCATATAAAGACCTCCTGGATTTGCAGCCCTCCTCAT  
TGCCCTAGCTGCCCTCGCTTTATTCTCCCCAAACCTTCTGGGCGACCCAGATAATTTT  
ACCCCGCAAAACCCACTTGTTACACCGCCCCATATCAAGCCCGAGTGATATTTCTC  
TTTGCATACGCCATTCTCCGATCTATTCCAAATAAACTTGGCGGAGTACTCGCCCTGT  
TGTTCTCTATTTTAATCCTCATGCTTGTCCCCATCCTCCACACATCAAAACAACGAAG  
TCTAATATTCCGACCCTTTTCGCAATTCCTATTTTGATCCCTCGTAGCAGACGTAATA  
ATTCTCACATGAATCGGGGGAATGCCCGTAGAACACCCCTTTTGTTATTATTGGACAA  
GTTGCTTCATTCTCTACTTCTTCCTTTTCTTAGTCATAATTCCAGTAACAGGCTGACT  
AGAAAATAAGATTCTCGGATGACAGTATGATTTCAACACTCATCACCCATATTATCA  
ACCCATTGGCCCTAATCGTACCCGTTCTACTAGCAGTTGCATTCCTCACCTTACTTGA  
ACGGAAAGTGCTCGGTTACATGCAACTCCGAAAAGGCCCAATATCGTCGGACCTT  
ATGGCCTTCTCCAACCTATCGCTGATGGTATTAACCTTTTTATCAAAGAACCTGTTG  
ACCTTCCACCGCATCCCCAGTCCTTTTTCTTTTAGCACCTATGCTCGCTCTCACTCTTG  
CTCTTACACTATGAGCCCCTATGCCTCTTCCATACTCCACAGTTGACCTTAACTTGGG  
GATCTTATTTGTCCTCGCACTGTCAAGCCTTGCAAGTTTACTCTATCCTCGGCTCAGGT  
TGAGCATCAAATTCAAATATGCCCTCGTTGGGGCACTCCGAGCCGTAGCACAGAC  
CATCTCTTATGAAGTCAGCCTAGGACTTATTTTACTTAATATCATCATCCTCACAGGG  
GGTTTCACTCTTCAGACCTTTAACACAGCCCAAGAGGCTGTCTGACTAGTTTTGCCA  
GCATGACCTCTAGCTGCAATATGGTATATTTCCACACTCGCCGAAACAAACCGGGCA  
CCCTTCGATCTCACCGAAGGAGAGTCCGAACCTCGTCTCAGGCTTCAACGTCGAGTAT  
GCAGGAGGACCCTTCGCCTTATTCTTCCTAGCCGAATACTCCAACATCCTCTTGATA  
AATACCTTATCCGCTGTCTTATTCTTGGGCGCCTCACACATTCCCCTATCGCGACCC  
TGACGGCTATTAATCTAATAACCAAGGCGGCACTTCTTTCAGTTGTTTTCTTTGGGT  
GCGGGCCTCTTACCCCCGGTTTCGATACGACCAGCTAATACACCTGATCTGGAAAAA  
CTTTCTCCCCCTCACCTAGCGCTGATTATTTGACACTTGGCACTTCCCCTGCACTT  
GCTGGACTTCCACCGCAACTGTAAATGAATCCTTTTATCCTAACCAACCTTCTCCTTG  
GTCTAGGTCTCGGAACACAAATTACATTTGCGAGTTCACACTGACTCTTAGCCTGAA  
TGGGCCTAGAAATCAACACACTAGCCATTATCCCCTCATAGCGCAACATCACCACC  
CTCGAGCGGTTGAGGCTACTACTAAATACTTTTTAACACAAGCAACAGCCGCCGCCA  
CACTCCTGTTTGCAAGCATAACAAACGCCTGGCTCACAGGCCAGTGGGACATCCAA  
CAAATGACACACCCCCCTCGCCACAACCATAATTATTATTGCCCTGGCATTGAAAATT  
GGTCTAGCACCAATACACTCCTGACTCCCCGAAGTTCTTCAAGGTTTGACCTAACA  
ACCGGCCTCATCCTTTCAACTTGACAAAAGCTTGCCCCCTTTGCACTACTTATACAA  
ATCCAACCTGACAACCCCAACCCCTTAATTATTTTAGGCCTCACATCTACCCTCGTGG  
GTGGGTGAGGCGGCCTCAACCAACGCAGCTCCGTAAAATCCTTGCCCTATTCATCAA  
TCGCCACCTCGGCTGAATAATACTTATCCTTCAGTTCTCACCCCTCCTCACCTTCT  
TGCTCTCATCACCTACCTCTTATAACATCCTCAGTATTCCTAATCTTCAAAATAAACA  
AAGCCACAACCATTAATGCCCTCGCAATCTCCTGAACAAAAACGCCTATCCTAACAG  
CTCTTATCCCCTAGTCTTACTCTCCCTAGGGGGCCTTCCCCCTCTAACCGGGTTCAT  
ACCTAAATGGTTTATCCTCCAAGAACTAACAAGCAAGACCTGCCACCCTCGCCACT

CTAGCAGCCCTTACTGCCCTCCTCAGCTTATACTTCTATCTACGACTCTCGTACGCGA  
TAACACTCACAATAGCCCCAAACAACCTCACCGGCACCACTCCGTGGCGATTCTCCT  
CCCCTCAACTAACCCTTCCGCTCGCAATCTCAAGCACAACCGCCACCCTACTACTCC  
CGCTAGCTCCTGCCACCCTAGCGCTCTTAACAACCTATGAGCCTTCTTATGACAATT  
ATTACAATCACTGCCCTGCTTTCTACAATTCTTGCCATTGTATCCTTCTGACTGCCGC  
AGATTTACACGACCACGAAAAGCTTTCACCATATGAATGCGGCTTCGACCCCATGG  
GCTCTGCTCGACTTCCCTTCTCACTACGATTTTTCTCATCGCCATCCTCTTCCTCCTC  
TTCGATCTAGAAATTGCACTCCTTCTTCCACTTCCTTGAGGAGATCAGCTACCTACGC  
CCTTGCTGACATTCACCTGAGCCACAGCAGTCCTTTTTCTTCTCACCTTGGGTCTTAT  
CTATGAATGAATTCAAGGAGGCCTAGAGTGGGCTGAATATGCTAAAAATCTTAATTC  
CAACACTTATACTTATCCCAACAGCCTGGCTGGTCAAACCAAACCTGACTCTGACCAA  
CTACCTTAACTCATAGTTTCTGCATCTCCCTAGCTAGTCTCTCATGACTTAAGAACCT  
TTCAGAAACTGGCTGATCTTCACTAAACCTCTGTATAGCAACAGATGCCCTATCAAC  
ACCCCTTCTTGTCTCACATGCTGATTACTCCCCCTGATAATTTTGCAAGTCAAAAC  
CACACGGCCTCAGAACCCATCAACCGCCAGCGCATGTATATTACCCTCCTTACCTCC  
TTCAATTCTTCTTAATCCTCGCATTTCGGCGCAACCGAAATTATCATGTTTTACGTGAT  
GTTGGAAGCCACTCTTATCCCCACGCTCATTATTATCACACGCTGAGGTAACCAAAC  
AGAACGTCTTAACGCAGGTACCTACTTCTTCTATCTACACCCTGGCAGGGTCACTCCC  
CCTGCTCGTCGCCCTACTATTGCTTCAAAATTCCGCCGGGACCCTCTCACTCCTCACC  
CTCCATTACACCGACCCACTCAATAACATCCTATGGAGACAACTTTGATGAGCGGG  
CTGCCTCCTGGCCTTCCTAGTTAAAATACCTCTCTATGGTGTCCATTTATGACTTCCC  
AAGGCACACGTGGAAGCCCCCATTGCAGGCTCAATAATTCTTGCAGCTGTCTTCTT  
AAGCTTGGCGGTTACGGCATAATCCGAATGATAACAATGCTAGAGCCACTAACTAA  
GGAATAAGCTACCCCTTCATCATCTTCGCACTCTGAGGTGTAGTAATAACTGGCTC  
GATTTGTCTACGACAACTGACCTTAAATCCCTAATTGCCTACTCATCCGTCAGCCA  
CATAGGCCTGGTAGCTGGGGGGGTTCTAATCCAATCACCTGAGGCCTCACAGGGTC  
CCTAATCCTGATAATCGCCACGGTCTAACCTCCTCAGCTCTCTTTTGTGGTAAAC  
ACAACTACGAGCGAACACACAGCCGGACCATGGTACTGGCACGAGGACTTCAAAT  
GGCCCTCCCCCTTATGGCAACCTGGTGATTTATTGCCAGCTTAGCCAACCTAGCACT  
TCCACCTCTTCCTAACCTTATGGGTGAACCTATAATTATTATCTCCCTATTTAACTGA  
TCCTGATGAACCCTGGCACTCACAGGAACCGGCACCCTGATCACAGCTGGCTATTCA  
CTCTATATATTCTTATAACCCAACGAGGCCCGCTCCCAACACACATTCTTGCATC  
GAACCATCTCACACCCGAGAACACCTGCTCATTGCCTTCACCTACTCCCTCTCATTCT  
CCTAGTGCTTAAACCCGAGCTAATTTGAGGCTGAACAGCCTATGACCCCCACACATT  
TTGCATTTTCTCTGCCTTTCTTCTTGGCCTGACAGGCCTTGCATTTACCGATTTAC  
CTCCTCTCCGCCCTACTATGCTTGGAGGGTATAATACTGTCCCTGTTTCATTGCCCTCT  
CCCTTTGGACACTTCAACTAGACTCAACCAACTTCTCAGCTTCCCCAATACTTCTCCT  
AGCATTTTTCGGCCTGTGAAGCAAGTGCAGGTCTGGCCCTCCTAGTAGCTACCGCTCG  
AACACATGGTACCGACCGACTTCAAAGCCTGAACTTACTACAATGCTAAATGTCTCC  
AAACATGTTGATTATGTCCTCCAGTCTCGCCATCGTGTTTACACTCCTCACTTTCCCG  
CTAGCCACATCTCTCCTTCCTTCTCCTCGAAAACCTCCAATGGGCCAACTCACACGTG  
ACAATAGCTGTAAAAATAGCTTTCTTTGTAAGCCTCCTCCCGTTAGCTCTCTACCTCC  
ACGAAGGCTCAGAAACAATCATTACTATCTGAACCTGAATAAATACTAACTCATTTA  
GCATTAATATCGGCCTAAAACCTTGACTTCTACTCAATCATCTTCGTCCCCATTGCCCT  
TTACGTAACCTGGTCAATTCTAGAATTTGCCTCTTGATACATGCACGCAGACCCACA  
AATAAACCGTTTTTTTTAAATACTTACTAACATTTCTCATCGCGATAATTATTCTAGTC  
ACCGCAAACAACATGTTTCAACTATTCATCGGCTGAGAAGGTGTGGGTATTATATCC  
TTCCTTCTTATCGGCTGATGGTATGGCCGAGCAGATGCTAACGCCGCGGCACTGCAA

GCCGTAATCTACAACCGGGTTGGAGATATCGGCCTTATCTTCGCCATAGCATGAATA  
GCACTCAACCTAAACTCCTGGGACTTAGAACAACCTATTTGCAGCCTCTAAGAACATA  
GACCTATCTTTCCCACTTCTAGGCCTTATCGTCGCAGCAACTGGTAAATCAGCCCAG  
TTTGGACTTCACCCCTGACTACCCGCCGCAATAGAAGGCCCGACACCGGTATCCGCC  
CTACTTCACTCAAGCACGATAGTTGTCTCGCAGGAATTTTCCTACTAGTCCGAATGAGC  
CCGCTCCTGGAAAACAACCCCATAGCCCTTACAACCTGTCTATGCCTCGGAGCCCTC  
ACAACATTATTTACCGCAACTTGTGCTCTTACCCAGAACGATATCAAGAAGATTATT  
GCATTCTCCACATCTAGCCAATTAGGACTAATAATAGTTACTATTGGACTAAACCAA  
CCACAACCTTGCATTTCCTCCACATCTGCACACACGCCTTCTTCAAAGCCATGCTATTCT  
TATGCTCTGGGTCTATTATTCACAGCCTAAACGACGAACAAGACATCCGGAAAATA  
GGGGGAATACATCACCTCACCCCTTCACATCTTCTTGCTTAACTATTGGCAGCCTC  
GCCCTCACGGGAACCCCTTTCCTAGCCGGCTTCTTCTCCAAAGATGCAATTATTGAA  
GCAATAAACACATCCCACCTAAACGCCTGAGCCCTCGCTCTCACCCCTCCTAGCCACG  
TCTTTTACAGCAGCTTACAGCTTTTCGACTGGTATTCTACGTCTCGATGGGTCAACCCC  
GATTCAACCCATCACCCCTATTAATGAAAACAACCCAGCACTTATTAACCCAATCAA  
GCGACTCGCCTGAGGAAGCATTATTGCAGGACTCCTCATTTTCTCCAACATCTCCCC  
ATTAAAAACCCCGGTTATAAGCATACCTCCAGCCCTCAAACCTAGCTGCCCTTGCAGT  
CACAATCTCAGGCCTTCTCGTCGCTATAGCAATTGTCTGCAATTGTAAACAAGCCATC  
TCAACCAGCACCCATCGCAACCCCCACCCTTCTCCCTAATACTAGGCTTTTACCCC  
CACATTCTACACCGCCTAGCCCCAAAACCTCGGCCTACTCCTAGGTCAGTCTATTGCC  
AGCCAAATAGTCGACCAAACCTGACTAGAGAAGACAGGACCCAAAGCAATCTCATC  
ATCCAATATCCCCCTGGCCTCCGCCACAAGCAACATTCAAAGGGAATGATCAAAA  
CATTCTCCTTTCTTCGTCCTCTCTCTTGCCCTAATAATTCTTATTTTTACTATTTAAT  
GACTTTTGTGATATGCCTAGTATTGTTTTGCCTTGTTTTAGGGTTAGTAGCGGTTGCT  
TCGAACCCATCACCTTATTTTGCTGCTTTAGGGCTGGTTGTTGTTGCTGGTATGGGGT  
GTGGGGTACTGATCGGTCATGGTGGGCCCTTCTGTCTGTTAGTACTATTTTTAATTTA  
CTTGGGGGGGATGTTGGTTGTGTTTTCGTATTTCGGCGGCGTTGGCTGCTGAACCTTA  
CCCAGAACTTGGGGGAGTCGGCCAGTAATAGTTTACAGTGCTTTACATGGTGGGG  
GTGGTGTAGTCTCTGTATTGTTCTGAGGGGGGTGATATGAGTCTTCATGGGTGTTAG  
TGGATGAGTTGGGTGAGTTTTCGGTGTTTCGGGGTGATATTGGAGGAGTTGCTTTAA  
TATACTCGTCAGGGGGTGAATGTTGCTTATTAGTGCGTGGGTACTTTTATTGACACT  
ATTTGTGGTGCTCGAGTTGACCGTGGGATGAGTCGAGGGGCGCTTCGGCAGTTT"/>

<sequence id="seq\_Platichtys\_stellatus\_Ps2011" spec="Sequence"  
taxon="Platichtys\_stellatus\_Ps2011" totalcount="4"  
value="ATGATACTAAGCTTCTTTGACCAATTTATGTCCCCGTATTCCTGGGTATCCC  
ACTAATTGCACTCGCAATTACCCTGCCCTGAACGCTCTTCCCAACCCCTGTGTCCGCT  
GATTAAACAACCGCCTAATTTCACTTCAAGGGTGATTTATTAGCGGTTTTACCTCAC  
AACTTCTCCTCCCCCTAAACCCTGGAGGACACAAATGAGCGCTTCTATTTGCCTCAC  
TAATCTTTCCTTTCTCTATTAACATGCTTGGGCTTCTTCCATACACCTTCACACCTAC  
AACTCAGCTCTCACTTAACCTCGGCCTCGCAGTCCCCTCTGGCTGGCAACCGTCAT  
TATGGTATGCGAAACCAACCAACAGTTGCTTTAGGTCACCTCCTCCCCGAAGGGACT  
CCCACCCTCCTGATTCCCGTACTAATTATCATCGAGACAATTAGCCTATTTATTTCGAC  
CTCTCGCTCTTGGTGTTCGACTTACAGCGAACCTCACAGCAGGCCACCTGCTTATCC  
AACTCATTGCAACAGCTGCCTTTGTTCTTCTTCCCCTTATACCCGTTGTTGCTATTTTA  
ACAACAACAGTTCTTTTCCTCCTCACCCCTGCTAGAAGTAGCCGTTGCTATAATTCAA  
GCCTACGTCTTTGTACTACTCCTAAGTCTCTACCTACAAGAAAACGTTTAATGCCTCA  
ACTGAACCCCGCACCCCTGATTTGCAATTTTGGTTTTCTCTTGAATAATCCTATTAAC  
ATCATTCCCCCAAAGTCTTAGCTCATACTACCTAATGAGCCAACCTCCCAAAGC

ACACAAAAACAAAACAGAACCCTGAAACTGACCATGATACTAAGTGGCAATCACAC  
GTTGATTTTTCTCGACCAATCACAAAGACATCGGCACCCTCTATCTCGTATTTGGTGC  
CTGAGCCCGGAATAGTGGGGACAGGCCTAAGTCTACTCATTCGAGCAGAGCTAAGCC  
AACCTGGGGCTCTCCTGGGGGACGACCAAATTTATAACGTAATCGTCACCGCACAC  
GCCTTTGTAATAATTTTCTTTATAGTAATACCAATTATGATTGGAGGGTTTGGAAACT  
GACTTATCCCATTAATAATTGGGGCCCCCGATATGGCCTTCCCTCGAATAAATAACA  
TGAGCTTCTGACTCCTACCCCCATCCTTCCTGCTTCTCCTGGCCTCTTCAGGTGTTGA  
AGCCGGGGCGGGAACAGGGTGAAGTGTATATCCCCCACTAGCTGGAAACCTAGCAC  
ACGCCGGGGCATCCGTAGACCTCACAAATCTTTCCCTTCACCTTGCCGGAATTTTCATC  
AATTCTAGGGGCAATCAACTTTATTACCACCATTATCAACATGAAACCAACAGCAGT  
CACTATGTACCAAATCCCCTGTTTGTGGGGCCGTAATAATTACCGCCGTTCTTCTC  
CTCCTTTCCCTTCCGGTCTTAGCCGCTGGCATTACAATGCTACTAACAGACCGCAAC  
CTGAACACAACCTTCTTTGATCCTGCTGGAGGAGGTGACCCCATCCTCTACCAGCAC  
CTGTTCTGATTCTTTGGCCACCCAGAGGTATACATTTTAATTCTTCCAGGCTTCGGGA  
TAATTTCTCACATTGTTGCATACTATGCAGGTAAAGAAAGAACCCCTTTGGCTACATGG  
GCATGGTCTGAGCTATGATGGCTATTGGACTCCTGGGCTTCATCGTATGGGCCCATC  
ACATGTTTACAGTCGGAATAGACGTAGACACACGAGCTTACTTTACCTCAGCCACAA  
TAATTATTGCCATCCCAACCGGCGTAAAAGTCTTTAGCTGACTCGCAACCCTCCACG  
GGGGAAGCATTAATGAGAAACCCCACTTCTATGAGCTCTAGGCTTTATTTTCCTAT  
TTACAGTCGGAGGTCTTACTGGTATTGTCTTAGCTAACTCGTCTCTTGATATTGTACT  
TCATGACACATACTATGTAGTAGCCCACTTCCACTATGTCCTATCAATAGGAGCTGT  
ATTTGCAATCGTTGCCGCCTTTGTGCACTGATTCCCCCTATTTACAGGCTACACCCTC  
CACTCTACATGAACAAAAGTCCACTTTGGCCTAATGTTTGTGCGAGTCAATTTAACA  
TTCTTCCCCCAACACTTCCTCGGTCTAGCAGGAATACCTCGACGGTACTCAGACTAC  
CCCGATGCATACACGCTTTGAAATACTGTCTCATCAATCGGGTCGCTAATGTGCTC  
GTTGCTGTTATCTTATTTTTATTTATTATTTGAGAAGCATTTACTGCCAAACGAGAAG  
TCGGGGCAGTAGAACTAACTTCAACTAATATTGAATGACTTTACGGCTGCCCTCCAC  
CCTACCACACATTTGAAGAGCCCCGCATTCGTTCAAGTTCGTATAAACTAAATGGCAC  
ATCCATCACAACTGGGATTTACAGGACGCAGCTTCCCCCTAATAGAAGAACTACTTC  
ACTTCCATGATCACGCCTTAATAATTGTTATTCTCATCAGCACAAATAGTACTGTATAT  
TATTGTGGCAATGGTCACGGCCCACTAACCGACAAGCTTGTGTTAGACTCTCAAGA  
AATTGAGGTTATCTGAACAGTTCTCCCAGCTATTATTCTTATTCTCATCGCCCTCCCA  
TCACTCCGAATTTTATACTTAATAGACGAAATTAACGACCCCCACCTGACAATTA  
GCCTTGGGGCCACCAATGGTACTGAAGCTACGAATACACAGACTACCAAGACCTCGG  
TTTTGACTCCTACATAATCCCAACTCAAGACCTAACCCCCGGACAATTCCGGCTATT  
GGAAGCAGACCATCGAATGGTAATTCCTGTAGAATCTCCGATTCGAGTTCTAATTT  
AGCTGAAGATGTCTTGCACTCCTGAGCAGTCCCTTCCCTGGGCGTAAAAGTAGACGC  
CGTACCTGGACGGTTAAACCAAGCAACCTTTATTGTTAGCCGACCCGGCGTGTTCTA  
CGGCCAATGCTCCGAAATTTGCGGTGCAAACCATAGCTTTATGCCCGTCGTTGTAGA  
GGCAGTCCCCTTGACCACTTTGAGAACTGGTCTTCGCTAATAATTGAAGACGCCTA  
TGGCCCATCAAGCACACCCATACACATAGTCGACCCTAGCCCATGACCCCTCACGG  
GGGCTATTGCTGCCCTATTGATAACATCTGGCCTTGCTATCTGATTCCACTTTCCTC  
CACAAACCCTAATAACTATCGGAACAGTTCTTCTTATTTTAACAGTCTTCCAATGATG  
ACGTGATGTTGTTGCGAGAAGGCACATTTCAAGGACACCACACCCCTCCCGTTCAAAA  
AGGCCTCCGATACGGAATAATCTTGTTTATTACCTCAGAAGTTCTATTCTTCCTAGGT  
TTCTTCTGGGCCTTTTATCACTCGAGCCTGGCACCTACCCCTGACCTAGGCGGCTTCT  
GGCCACCAGCAGGGATCACCCCTTGGACCCATTTGAAGTCCCCTTCTAAACACAG  
CAGTCTACTTGCTCTGGCGTAACTGTAACATGAGCACATCATAGCATTATAGAGG

GAAAACGAAAACAAGCAATTCAATCTCTTGCTCTAACAATCTTACTCGGGGGTACT  
TCACCTTCCTCCAGGGCCTTGAATACCACGAAGCCCCCTTCACTATTGCAGACGGGG  
TTTATGGTGCCACATTCTTTGTTGCCACCGGCTTCCACGGACTTCACGTCTTAGTTGG  
CTCCTCCTTCTTAGCCGTCTGTCTCCTACGCCAAATTCTTCACCATTTTACATCAGAC  
CACCCTTCGGGTTTGAAGCAGCCGCATGATACTGACACTTCGTAGACGTCTGTCTGA  
CTCTTCCTCTATATCTCTATTTACTGATGAGGATCTTAATGGCCAATCTCCGTAAATC  
CCACCCCCTTCTTAAAATCGCAAACGATGCTTTAGTTGATCTCCCAGCCCCCTCAA  
CATCTCTGTCTGGTGAACTTTGGGTCCCTCTTGGGACTCTGTTTAGTAACCCAGATT  
GCCACCGGCTTATTCTTAGCCATACACTACACATCTGATATTGCTACTGCCTTCACCT  
CCGTTGCACACATCTGTGAGACGTCAACTACGGTTGACTCATCCGAAGCATTTCATG  
CCAACGGCGCATCATTCTTTTTCATTTGCATTTACCTTCATATCGGCCGGGGTCTATA  
CTATGGCTCTTACCTTTATAAAGAAACATGAACTATTGGAGTTGTACTGCTACTTCTC  
GTTATAATGACGGCCTTCGTTGGGTACGTCCTCCCTTGAGGACAAATGTCATTCTGG  
GGTGCAACTGTCATTACCAACCTTTTATCTGCCGTCCCTTATGTTGGGGGCACACTTG  
TCCAGTGAATCTGAGGCGGCTTTTCTGTAGACAATGCCACCCTTACCCGGTTCTTTGC  
ATTCCACTTCCTTTTCCCATTTCATCATTGCGGCCGCAACAGTAATCCATCTACTCTTT  
CTCCACGAAACGGGGCTCAAACAACCCACCGGACTAACTCAGACTCTGATAAAGT  
CCCCTTCCACCCCTACTTCACATACAAAGACCTCTTGGCTTTGCAGTTCTCCTTACTG  
CACTGGCTTCGCTCGCCCTATTTTCCCCCAATCTCTTAGGAGACCCGGACAACCTCAC  
GCCTGCAAACCCGCTCGTCACACCACCACACATCAAGCCAGAGTGATACTTCCTCTT  
TGCCTACGCTATTCTGCGCTCCATTCCAAACAAGCTTGGTGGAGTACTTGCTCTTTTA  
TTCTCCATCCTCGTTCTCATGCTCGTCCCCTTTCTCCACACCTCAAACAACGAAGCC  
TCATATTTGCGCCTGTAAACACAATTCCTATTTTGGTCTTTAGTAGCCGACGTAATAAT  
TCTGACCTGAATTGGAGGGATACCCGTAGAACACCCCTTCGTTATCATCGGACAAGT  
AGCATCTCTCATCTACTTCTCCCTTTTCTAGTCCTAATCCCAACAGCAGGCTTAATG  
GAAAATAAAGTCCTCGGATGAAAATATGATTTCAACCCTCATTACGCATATTATTAA  
CCCCTAGCCTTTATTGTCCCGGTTTTACTAGCCGTAGCATTCTTAACCCTCCTTGAG  
CGAAAAGTACTAGGCTACATACAACTCCGAAAAGGGCCTAACATCGTTGGGCCTTA  
CGGCCTCCTTCAACCTATCGCTGACGGCCTAAAGCTATTTATTAAAGAGCCCGTTTCG  
CCCTTCCACTGCCTCGCCCGTCTTGTTCCCTCGTAGCCCCCATGCTCGCGCTCACACTA  
GCCCTTACACTTTGAGCCCCCATACTTTCCCGTATCCTGTTGTTGACCTTAACCTGG  
GCATTTTGTATCCTAGCACTATCTAGCCTTGCAGTTTATTCCATCCTTGGGTCAGG  
GTGGGCTTCTAATTCAAAGTATGCTCTAGTGGGGGCACTACGGGCTGTTGCCAGAC  
AATTTCTACGAAGTGAGCCTCGGACTCATCTTACTTAACATCATTATCTTTACGGG  
AGGCTTCACACTTCAGACCTTCAACACAGCCCAAGAAGCTATCTGACTGGTGGTACC  
CGCTTGACCACTGGCTGCTATGTGATACATCTCCACCCTTGCCGAGACAAACCGTGC  
ACCTTTGACCTGACAGAAGGGGAGTCAGAGCTTGTTTCAGGCTTCAACGTAGAGTA  
CGCCGGAGGACCCTTTGCCCTGTTCTTTTGTAGCTGAATACTCAAACATCCTCCTAATG  
AATGCTCTATCCGCAACACTTTTCTGGGCGCTTCCCACATTCCGTCCATCCCCGAAT  
TAACCAGCATCAATATCATAACCAAAGCAGCTCTTCTCTCAGTCGTCTTCTCTGAG  
TCCGAGCCTCCTACCCGCGGTTCCGTTATGACCAACTTATGCACCTCATTGAAAAA  
ACTTTCTTCCACTGACGCTAGCCCTAGTTATCTGACACTTAGCGCTCCCTATTGCATT  
TGCTGGCCTCCCACCACAGCTGTAGATGAACCCCTACATCTTGACCACCCTTCTATTT  
GGTTTGGGCCTAGGTACAACACTCACATTTGCAAGCTCGCACTGACTTCTGGCTTGA  
ATGGGCCTCGAAATTAATACTGGCCATTATTCCACTGATAGCCCAACATCACCAC  
CCACGGGCGGTAGAAGCCACTACTAAGTACTTTTGTAGCACAGGCCACAGCAGCCGC  
CACCCTCCTCTTTGCTAGCACCAACGCCTGACTTACCGGACAATGGGACATCCA  
ACAAATAACCCACCCACTTCCCCTACAATAGTCGTGATTGCCCTTGCACTAAAAAT

TGGCCTAGCACCCATGCACTCTTGACTCCCCGAGGTTCTTCAGGGCTTAGACCTCAC  
CACCGGCCTTATCCTATCGACCTGACAAAAGCTTGACCCCTTTGCTCTATTACTCCAA  
ATTCAAACAACAACCCACACCCCTAATCATTATCGGCTTACTTTCTGCCCTTGTGG  
GCGGGTGAGGGGGCCTTAACCAGACACAAGTGCCTAAGGTCCTTGCTACTCCTCA  
ATTGCACACCTCGGCTGAATGATACTTATCCTTCAATTTTCACCACTCCTTAGCCTCC  
TTGCTCTTCTCACGTATTTTCTATGACTTTTTTCAGCATTCTCATCTTCAAAGTAAACA  
AAGCTACCACTGTTAATGCACTCGCAATCTCCTGAGCAAAAAGTCCCGCCCTTACAG  
CCCTAGCGCCTCTTGTTTTGCTTTCCCTCGGCGGCCTTCCACCACTCACTGGGTTCAT  
ACCAAAATGATTTATCCTTCAAGAACTAACTAAACAAGACCTCCCACGCTTGCTACC  
GTTGCTGCATTAAGTGCCTTTTGAGCCTTTACTTTTACCTGCGTCTCTCATACGCAA  
TAACCTGACAATGTTCCCTAACAACCTCGTTGGTGTGGCCCCCTGGCGATTTTACTC  
ACCTCAATTTACCCTCCCCCTCGCCGTCTCAACTGCAGCAACCACCCTTCTTTTACCA  
CTAGCCCCTGCTGCCGTGGCACTCCTCATCACTTATGAGCCTTCTTCTTACCATCATT  
ACAATTACCGCCCTCCTCTCAACGGTACTTGCCATTGTATCCTTCTGACTCCCCCAA  
TTACACCAGATCATGAGAACTCTCACCTTACGAGTGTGGCTTTGACCCCATAGGTT  
CCGCCCCGACTACCTTTCTCGCTACGATTTTTTCTCATCGCAATCCTCTTTCTTCTTTT  
GACTTAGAAATTGCTCTTCTCCTCCCCCTCCCGTGGGGAGACCAGCTAGCATCCCCT  
CTGCTTACATTTACCTGAGCTACGGCCGTCCTATCCCTGCTAACCCTTGGCCTCATT  
ACGAGTGAATGCAAGGAGGCCTAGAATGAGCTGAATATGCTAAAGATTCTCATCCC  
AACATTCATGCTAATTCCAACAGCTTGACTGCTTAAACCCAACTGGCTGTGGCCCAT  
AACTTTATTGTATAGCTTCTGCATTTCCCTTATTAGCCTCTCATGACTAAAAAACCTC  
TCAGAAACCGGCTGATCCTCACTCAACCTATTCATAGCCACCGACTCCCTGTCAACC  
CCACTTCTTGTCCTCACATGCTGGCTTCTTCCGTTAATAATTTTGGCGAGCCAGAAGC  
ACACAGCTTCTGAGCCCCCTCGGCCGGCAACGCATGTACATCACACTTCTCGCCTCCT  
CCAATTTTTTCTAATCTTAGCATTTAGCGCCACCGAGCTAATCATGTTTTACGTAATA  
TTTGAGGCTACTCTCATCCCTACGCTTATCATCATCACCCGCTGGGGTAACCAAACC  
GAACGCCTAAATGCAGGGACCTATTTCTCTTCTACACACTGGCGGGCTCCCTTCCT  
CTTCTTGTCGCCTTACTCTTACTCCAAAACACATCCGGGACTCTCTCATTACTGACAC  
TACACTACGGAGACCCGCTAGCTGTATCCTACGCAGACAACTATGGTGAGCAGG  
CTGTCTTTTAGCCTTCCTGGTTAAGATGCCACTCTATGGTGTTACCTATGGCTACCT  
AAAGCACACGTTGAAGCCCCAATTGCAGGCTCAATAATCCTTGAGCTGTCTACTT  
AACTAGGGGGCTACGGCATAATTCGCATAATAACAATGCTGGAACCTTTAACTAA  
GGAGTTGAGCTACCCATTCAATTGTCTTCGCACTCTGGGGTGTAATCATGACCGGCTC  
AATTTGTCTACGCCAAACAGACCTTAAATCCCTAATTGCCTACTCATCCGTCAGCCA  
CATGGGCTTAGTTGCCGGGGGGATTCTCATTCAATCACCTGAGGTCTCACAGGAGC  
ACTTACACTTATGATTGCACATGGTCTTACCTCCTCAGCCCTCTTCTGCCTCGCAAAC  
ACAACTATGAACGAACTCACAGCCGCACAATGGTCTTGGCACGAGGACTTCAGGT  
GGCTTTACCCCTAACGGCCACTTGATGGTTTATCTCTAGCCTAGCTAACCTCGCCTTA  
CCTCCGTTGCCCAACCTCATGGGGGAACCTCATAATTATTACTTCTCTTTTAACTGGT  
CCTGATGAACCTGGCATTAAACAGGCTCCGGCACTCTTATCACAGCCGGTTATAGCC  
TCTACATGTTCTTAATGACCCAACGAGGCCCTCTCCCAACACATGTAATTGCACTTG  
AACCATCACACACCCGAGAACACCTTCTTATTGCCTTCATCTATTCTCTTGTCTT  
CTCGTGCTTAAGCCCGAGCTGATCTGAGGTTGAACTGCCTATGACCCCCACACACTT  
TGCTTCTCCTCAGCCTTTTTTCTAGGTTTAAACAGGCCTGGCATTCCACCGGTTCCAC  
CTCCTCTCCGCGCTATTGTGCCTTGAAGGGATGATACTATCCCTATTTGTTGCCCTCT  
CTCTGTGAACACTTCAACTAGACTCAACTAACTTTTCGGCATCTCCCATGCTCCTCCT  
TGCATTTTCAGCCTGCGAAGCAAGCGCCGGGCTCGCCCTTCTAGTTGCGACTGCCCCG  
AACCCATGGGACCGACCGACTACAAAGCCTAAACCTCCTCCAATGCTAAATGCACC

CCACCTCCCTAATGATCTCATCAAGCTTGGTTACAATCTTCGCATTACTAGCCTACCC  
CCTGGTCACCACAATTCGTCCAACGCCCCGGGGCCCCCAATGGGCAACATCCCATGT  
CAAAACAGCTGTAAAAATAGCTTTCTTTGTTAGCCTCTTACCCCTGGCCCTGTTTCTT  
AATGAAGGTGCCGAGACAATTGTTACTAATTGAACCTGAATAAACACAAACACCTT  
CGACATTAACATTAGCCTAAAATTTGACTTTTATTCGATTATTTTTACACCAATCGCC  
CTTTACGTCACCTGATCTATTCTAGAGTTTGCATCATGGTATATGCACGCTGACCCAC  
ACGTGAACCGCTTTTTTAAGTACCTTCTGACATTTCTAATTGCCATGATCATTCTAGT  
AACCGCAAACAACATATTTCAACTCTTTATCGGTTGAGAAGGTGTAGGAATCATATC  
ATTCCTCCTCATCGGGTGGTGGTACGGACGGGCGGACGCTAACACTGCAGCACTCCA  
AGCAGTCCTATACAACCGTGTTGGGGATATCGGGCTTATCTTCGCCATGGCTTGAAT  
AGCAACAAACCTGAACTCCTGGGAAATGCAACAAATCTTTGCAACCTCCAAAGACA  
TGGACTTGACCTACCCCTCCTCGGACTAATCGTTGCAGCAACTGGGAAGTCGGCTC  
AGTTTGGACTCCACCCTTGGCTACCCTCAGCCATGGAGGGTCCTACACCGGTATCTG  
CCCTACTTCATTCTAGCACAATAGTTGTTGCCGGCATTTCCTGCTAGTACGAATGAG  
CCCCCTTCTGGAAAATAACCCGACTGCCCTCACAACCTGCCTTTGTCTTGGTGCCCTT  
ACGACTCTATTCACAGCAACTTGTGCCCTCACCCAGAATGATATCAAAAAAATCGTC  
GCATTCTCTACATCAAGCCAGTTGGGACTTATAATGGTAACTATTGGACTAAACCAG  
CCCCAACTAGCATTCTCCACATCTGTACACACGCTTTCTTTAAAGCCATACTGTTTC  
TTTGTTCGGGGTCTATTATCCACAGCCTAAACGACGAACAAGACATCCGAAAAATA  
GGCGGCATGCACCACCTTGACCTTTTACATCATCTTGCCTAACAATCGGCAGCCTC  
GCCCTCACAGGTACCCCTTCTTGGCCGGTTTCTTCTCTAAAGATGCCATCATCGAA  
GCATTAAACACATCCCACCTAAACGCCTGAGCCCTAACCTTACTCTCCTGGCCACA  
TCTTTCACTGCAATCTACAGCTTCCGGGTAGTCTTCTTTGTGCCCATGGGCCATCCCC  
GATTCAGCCCATCTCCCCAATTAACGAGAACAACCCAGCAGTAATTAACCCACTTAA  
ACGACTAGCATGAGGCAGCATCATTGCAGGACTGCTAATTACCTCAAACATTACACC  
TCTAAAAACACCTGTGATATCTATGCCTCCCCTTCTTAAACTAGCCGCCCTCGCAGTT  
ACAATCCTAGGTCTACTTGTTGCTATAGAACTCGCCATATTAACCAACAAGCAGTTT  
AAATCAACCCCAGTCTTAACGTACACAATTTCTCCAACATACTAGGCTTCTTCCCTG  
CCATCGTACATCGCCTGACCCCAAATTGGGCCTAGTCCTCGGCCAAGACATCGCCA  
ACCAAATAGTAGATCAAACCTGACTAGAGAAAGCGGGGCCCAAAGCCATTGTATCC  
TCCAACCTACCCCTGGTTTCTTCTACAAGTAATATCCAACGAGGGATAATCAAAACG  
TATCTACTCTTTTCTTTTAACTAGCCCTTATAATCCCCACACTCATCCCCTAATG  
ACTTTTGTATATATTTAGTTTTATTTTCTCTTGTGTTGGGGTTAGTCGCAGTTGCTTC  
TAATCCGTCCCCCTACTTTGCTGCTTTGGGGTTAGTTGTGGTAGCTGGCATGGGGTGT  
GGTGTACTAGTCGGGCATGGGGGGCCATTTTTGTCTTAGTTCTTTTTCTAATTTACT  
TGGGCGGGATGTTAGTTGTGTTTGCATATTCAGCAGCGTTAGCTGCTGAGCCATACC  
CCGAGAGCTGAGGTAGCTGGTCGGTAATGGTGTATGGTTGTTTATGTGGCGGGGGTA  
GTGTAGTTTCTGGGCTGTTCTGAGGCGGGTGGTATGAATCGTCATGGGTTTTAGTAG  
ATGAGCTGGCCGAATTCTCGGTATTCCGGGGTGATATTGGAGGAGTGGCCTTAATAT  
ACTCTTCTGGGGGATGGTTACTGATCATTAGTGCATGGGTGCTGCTTCTTACCCTGTT  
TGTAGTCCTTGAGTTAACCGTGGTTTGAGCCGAGGGGCGTTGCGACGGTTT"/>

<sequence id="seq\_Pleuronichthys\_cornutus\_JQ639071" spec="Sequence"  
taxon="Pleuronichthys\_cornutus\_JQ639071" totalcount="4"  
value="ATGACACTAAGCCTATTTGACCAATTTGAATCCCCCGTACTATTTACATCCC  
TCTAATTGTACTGGCAATTGCCCTTCCATGAGTACTACTTCCTGTCCCCGGACTCGAT  
GAATTAGTAACCCCTACTAGCGTTTCAAGGCTGGTTTATTAAACAATTCACCTCAC  
AAATCCTCCTTCCCCTAAATACACCTGGGCATAAGTGAGCACTTCTCTTCGCCTCCCT  
CATCTTTCCTCTTTCTATTAACGTGCTTGGACTTCTTCCTTACACCTTCACACCTACTA

CTCAACTATCCTTTAACCTAGGACTTGCAGTACCCCTATGACTAGCAACAGTAATTA  
TGGAATACGTACCCAACCGACACATGCATTAGGTCACCTTCTACCAGAAGGTACTCC  
AACTGCCTTAATTCCTGTGCTAGTCATTATCGAAACAATCAGCCTATTTATTCGCCCT  
ATTGCCCTCGGTGTTTCGGTTGACAGCAAACCTTAACAGCAGGTCACCTCCTAATTCAA  
CTTATTTCAACAGCCACTTTTGTATATACTACCAATTATACCCACTGTTGCTATTTTAA  
CCACAACACTTCTGCTTCTTCTCACGCTCCTAGAAATTGCTGTTGCTATAATTACAGGC  
CTACGTCTTCGTCTACTCTTAAGCCTCTACCTACAAGAAAACGTCTAATGCCTCAA  
CTCAACCCCGGCCCTTGATTTTTTCATTTTAGCTGTCTTATGACTTTTATTTTTATCTCT  
CGCACCCCGAGTACTTTTAAAACACCTCTTCCCTAACAAAATAACACCCGAAGGAA  
AATTAGAACAAAATATGACCCTGAACCTGACAATGACACTAAGTGGCAATCACACG  
TTGATTCTTCTCAACCAATCACAAAGACATCGGCACCCTCTATCTTGTATTTGGTGCC  
TGAGCCGGAATAGTAGGGACAGCCCTAAGCCTGCTTATTCGAGCAGAACTAAGCCA  
ACCCGGAGCCCTCCTTGGGGACGATCAGATTTATAATGTTATCGTTACTGCACACGC  
CTTTGTAATAATCTTCTTTATAGTAATACCAATTATGATTGGAGGGTTTGGAACTG  
ACTTATTCCTCTAATGATCGGGGCCCCCTGATATAGCCTTCCCCCGAATGAACAACAT  
GAGCTTCTGGCTCCTTCCCCCATCCTTCCTCCTCCTTCTTGCCTCCTCAGGTGTTGAA  
GCTGGTGCCGGCACAGGATGAACTGTATATCCCCCTCTAGCCGGTAACCTAGCGCAT  
GCAGGGGCATCCGTAGACCTCACAAATTTTCTCACTTCACCTCGCAGGAATTTCTCA  
ATTCTAGGAGCCATTAACCTTCATCACTACTATTATTAATAATAAAACCTACGGCTATA  
ACTATGTACCAGATCCCCTACTATTTGTCTGAGCCGTACTAATTACAGCTGTCCTACTCC  
TTCTCTCTCTCCCAGTTTTAGCCGCTGGCATCACAAATGCTACTAACAGATCGAAACCT  
CAACACAACCTTTCTTTGACCCTGCTGGAGGGGGTGATCCCATTCTTTATCAACACTT  
GTTCTGATTCTTCGGTCACCCAGAAGTCTACATTCTGATTCTCCCAGGCTTCGGAATA  
ATTTACACATTGTTGCCTACTACGCAGGCAAAAAAGAACCCTTCGGCTACATGGGG  
ATGGTCTGAGCTATAATAGCAATTGGCCTCCTTGGGTTTATCGTCTGAGCCCATCAC  
ATGTTACAGTTGGGATGGATGTTGACACACGTGCATATTTTACATCCGCCACAATA  
ATTATTGCAATTCCAACCTGGTGTAAGTATTTAGTTGACTCGCCACACTTCATGGA  
GGGGATATTAAGTGAGAAACACCCCTACTATGAGCACTCGGTTTTATCTTCCTATTT  
ACAGTCGGAGGTCTAACTGGAATTGTATTGGCTAACTCATCACTGGACATTGTTTTA  
CACGACACATACTACGTCGTAGCCCATTTCCACTACGTCTTATCTATAGGCGCTGTCT  
TCGCTATTGTTGCTGCTTTCGTACACTGATTCCCCCTATTTACAGGCTACACTCTTCA  
CGAAACATGAACCAAAGTTCATTTTGGCGTAATGTTTCGCAGGGGTAACTTAACATT  
CTTCCCACAACATTTCTTAGGATTAGCCGGAATACCCCGACGATACTCGGACTACCC  
AGATGCCTTTACTCTGTGAAACACAGTTTCATCATTTGGCTCCCTAGTGTCCCTAGTT  
GCCGTAATTATGTTCTTGTTCATCATTTGAGAAGCATTTACAGCCAAACGAGAAGTT  
CAATCAGTAGAACTAACCGCAACTAATATTGAATGACTTCACGGCTGCCCCCACCT  
TATCACACATTTGAAGAACCTGCATTTGTTTCAGGTACGAATAGACTAAATGGCCCAT  
CCCCTACAACCTTGGAATTTCAAGATGCAGCTTCACCACTAATAGAAGAGTTACTTCAC  
TTTCACGACCACGCCCTAATAATTGTTATTCTTATTAGCGTAATAGTACTTTACATTA  
TTGTAGCTATGGTTACAGCTCAATTTACAGATAAGCTTGTGCTCGACTCCCAAGAAA  
TCGAGATTATCTGAACAATTCTTCCAGCTATTATTCTTATTCTTATTGCTCTACCATC  
CCTCCGAATTTTATACCTAATAGATGAGATTAATAGCCCGCACCTTACAGTAAAAGC  
TTTAGGCCACCAATGATACTGAAGCTATGAATATACAGATTACGATGACCTTGGCTT  
TGACTCGTATATAATTCCCACACAAGACCTCACCTCCGGCCAATTCCGACTTTTAGA  
AGCAGACCATCGCATAGTAGTCCCCGTAGAATCCCCTGTTTCGAGTTTTAATTACCGC  
CGAAGATGTCCTTCATTCATGAGCAGTACCAGCCCTAGGCACAAAAGTCGATGCTGT  
CCCAGGACGATTAAACCAAGCAACTTTTACTATCAGCCGGCCAGGCGTATTCTTTGG  
TCAATGCTCTGAAATTTGTGGGGCTAATCACAGCTTCATGCCAATTGTTGTAGAAGC



AGTTCCCCTAGAACACTTCGAATCCTGATCTTCATTAATAATTGAAGAAGCCTATGG  
CCCATCAAGCACACCCATTTACATAGTCGACCCCAGCCCCTGGCCCCTTACAGGCG  
CCATCGCTGCCCTACTAATAACGTCCGGCCTTGCTATCTGATTTCACTTCCACTCTAC  
AACCCTGATAACTTTAGGTACAATTCTTCTCATTTTAACAGCTTTCCAATGATGGCGA  
GATGTTGTTTCGAGAGGGTACCTTTCAAGGTCACCACACCCCACCAGTCCAAAAAGG  
GCTTCGGTACGGTATGATCCTCTTCATTACCTCCGAAGTTCTGTTCTTCTTGGGCTTT  
TTCTGAGCTTTTTATCACTCAAGCCTAGCACCCACCCCCTGAGCTAGGCGGTTTCTGAC  
CACCAGCTGGCATTACCCCTCTGGACCCATTTGAAGTACCCCTACTCAATACAGCAG  
TCCTTCTTGCCCTCAGGCGTTACAGTCACATGAGCCCACCACAGCATCATAGAAGGTC  
AACGAAAACAAGCCCTTCAATCCCTTGCACTTACAATCTTACTCGGAGGCTACTTCA  
CTTTCCTTCAAGCCCTTGAATACCACGAAGCCCCCTTACTATTGCAGACGGGGTGT  
ATGGCGCCACATTTTTTTGTGGCTACTGGCTTTCACGGCCTCCACGTATTAATTGGCTC  
TTCATTTTTAGCTGTCTGCTTTCTCCGCCAAGCCCTCCACCATTTACATCAAACCAC  
CATTTTGGGTTTGAAGCAGCCGCATGGTACTGACACTTCGTAGACGTCGTCTGACTC  
TTCCTCTACATCTCTATTTACTGATGAGGATCTTAATGGCCAGCCTACGAAAGTCCC  
ACCCCTTTTAAAAATCGCAAACCATGCTTTAGTCGATCTCCCATCCCCCTCCAACAT  
CTCTGTTTGATGAAATTTTGGATCCCTTCTAGGACTGTGCTTAATTATTCAAATCGTA  
ACAGGCCTCTTCTTAGCTATACACTATACCTCAGATATTGCAACTGCTTTTACCTCTG  
TAGCCACATTTGCCGAGACGTCAACTACGGTTGGCTAATTCGAAATGTGCATGCCA  
ACAGCGCATCATTCTTTTTTATTTGCATCTACCTTCACATTGGCCGAGGCCTCTACTA  
CGGCTCGTACCTCCAAAAGGAAACATGAAACGTTGGTGTCGTCTTCTTACTCGT  
CATAATAACAGCCTTTGTTGGATACGTTCTCCCCTGAGGTCAGATGTCATTYTGAGG  
CGCAACCGTCATTACCAACCTTCTCTCTGCGGTACCCTATGTTGGTAACACGCTGGT  
CAATGAATCTGAGGCGGATTTTCTGTAGACAATGCTACTCTCACCCGATTCTTCGCA  
TTTCACTTCCTTTTTCTTTCATTATTGCAGCCGCAGCAGTAATTCACCTACTCTTCCT  
GCACGAAACAGGCTCAAACAACCCACCCGGTCTTAATTCAGACTCTGATAAAATCC  
CCTTCCACCCCTACTTCTCGTATAAAGACCTCTTGGATTGCAATCCTTCTTACAGCT  
TTGGCATCCCTTGCCCTATTCTCCCCCAATCTCTTAGGAGACCCCGACAACCTTTACCC  
CCGCAAACCCGCTTGTTACACCCCTCATATTAAGCCAGAATGATACTTCCTGTTTG  
CATATGCTATTCTACGCTCCATCCCCAACAAGTTGGGAGGAGTACTTGCCCTCTTGTT  
CTCCATCCTAATCCTTATGCTTGTGCCCTCCTCCACACCTCTAAACAACGAAGTCTT  
ATATTCCGCCCCCTTCTCGCAATTCTTCTGATCCTTAGTAGCAGATGTAATGATCC  
TTACCTGAATCGGAGGAATGCCCCGTTGAACACCCCTTTGTTATTATTGGACAGGTTG  
CATCATTTCTCTACTTCTTCCTATTCTTGGTACTAATCCCCCTAACAGGTTGACTGGA  
AAACAAAGCATTAGCTTGAAAATATGATTTTCGACCCTCATCACACATGTTTTTAACC  
CCCTACTATTCAATTGTTCTGTATTACTAGCCGTAGCATTCTGACCTTACTTGAACG  
GAAAGTCCTTGGCTACATACAACTCCGAAAAGGACCAAACGTCGTAGGACCCTACG  
GCCTTCTTCAACCCATCGCCGATGGCATTAAACTATTTATTAAGAGCCCGTACGAC  
CCTCCACCGCTTCCCCTGTTCTTTATCCTTGCCCCCATGCTCGCACTCACCCCTAGC  
TCTCGCACTTTGAGCCCCCATAACCCCTTCCACACCCCATAGCTGACCTTAACCTCGGT  
ATCTTGTTTGTCTTAGCATTGTCCAGCCTTGCAGTTTATTCCATCTTAGGTTCAAGGCT  
GAGCCTCAAACCTCAAATATGCACTCATCGGGGCTCTCCGGGCTGTTGCACAAACCA  
TCTCCTACGAAGTTAGCCTCGGCCTCATTTTACTCAACATTATTATTTTTTCCGGCAG  
CTTCACTTTACAAACCTTTAACACAACCCAAGAAGCCATCTGATTAATTGTCCCTGC  
CTGACCTTTGGCTGCCATGTGGTATGTTTCTACCCTAGCAGAGACAAACCGAGCACC  
TTTCGACCTAACGGAAGGTGAGTCTGAACTTGTTTCCGGGTTTAACGTAGAGTATGC  
AGGTGGACCCTTCGCCTTGTTTTCTTAGCTGAATACTCCAACATCCTTCTTATGAAC  
ACCCTCTCTGCAGTACTATTCTTGGGAGCTTCTCATATCCCAACTTTTCCAGAATTAA

CAAGTATTAATCTTATAACCAAAGCCGCTCTTCTCTCAGTAGTGTTCTTATGGGTCCG  
AGCCTCATACCCCCGATTTTCGTTACGACCAACTTATGCACCTCACCTGAAAAAGCTT  
TCTCCCTCTCACACTGGCATTAGTTATTTGACATTTAGCTCTCCCTATTGCATTTGCG  
GGCCTCCCACCACAACCTGTAGATGAATCCTTACATCTTAACCACCCTTCTATTTGGCT  
TAGGTCTTGGTACAACACTTACATTTGCAAGCTCTCACTGACTCCTTGCTTGAATAG  
GCCTTGAAATTAACACTCTCGCTATTCTTCCCCTTATAGCCCGGCACTACCACCCCCG  
AGCAGTTGAAGCTACCCTAAGTACTTCCTTACACAAGCTGCAGCAGCCGCCACCCT  
CCTTTTTGCAACTATAACCAACGCTTGACTTACAGGCCAATGAGATATTCAACAAAT  
GACTCATCCCCCTCCCAACAACAATAATTATCGTTGCCCTAGCCCTAAAAATTGGCCT  
TGCACCAGTGCACCTCTGACTACCAGAAGTTCTTCAAGGTCTCGACCTAACCCTGG  
ATTAATCCTCTCTACTTGACAGAACTTGCCCCCTTCGCCCTCCTCATACAAATTCAG  
ACAACAACCCCAACCCCTCTTATTATTATGGGGTTACTTTCTACCTTGTTGGGGGTTG  
AGGTGGCCTCAATCAAACCCAGCTACGCAAGATTCTTGCTTACTCCTCAATTGCCCA  
CCTCGGCTGAATAGTTTTGATTCTCCAATTCTCACCCACCCTTACCCTCCTTACACTT  
CTTGCGTATATTCTATAACTTTATCAATATTTTTAATTTTCAAAAATAAATAAAGCCAC  
CACCATTAATGCCCTTGCTATCTCCTGATCTAAAACCCAGCTCTTACGGCACTAAC  
CCCTCTCATCCTTCTCTCTCTTGAGGCTTACCCCTCTTACAGGTTTTATGCCGAAA  
TGACTTATCCTTCAAGAATTTACTAAACAAGACTTACCCTGCTTGCCACCCTTGCCGC  
ACTTACTGCCCTCCTTAGCCTCTACTTCTATTTACGCCTCTCCTATGCCATAACGCTC  
ACCATATTCCCAATAACCTTGTAGGCGCAACCCCTGACGGCTTTACAACCTCCCAA  
CTTACTCTCCCTCTCGCCACATCCACCACGGCGACTATTCTTCTCCTTCCACTAACCC  
CCGCTGCTCTAGCACTACTTACCACCTATGAACCTTCTCCTAACTATTGTTACAATTA  
CAGCCCTTCTATCTATAATCCTCATAATTGTCTCTTTTTGGCTTCCCCAAATGACACC  
TGATTATGAAAAACTTTCGCCATACGAATGCGGCTTCGACCCGGTAGGTTACAGCGG  
ACTACCTTTTTTCACTACGATTTTTTTTAAATTGCCATCCTCTTTCTTCTGTTTGACCTAG  
AAATTGCACTCCTCCTCCCCCTCCCCCTGAGGAGACCAACTAGCATCACCGTTACTAA  
CGTTCTTGTGAGCTACAGGCGTCCTTTCCCTCCTAACCTTGCCCTCGTATACGAATG  
AATTCAAGGAGGCCTAGAATGGGCTGAATATGCTAATAATCTTAATCCCAACACTTA  
TATTAATCCCAACAGCCTGGTTAACTAAACCAACCTGATTATGGCCAACAACCTTTAA  
CGCATAGCTTTTGCATCTCCCTAGTTAGCTTATCGTGATTAAAAACATCTCAGAAA  
CCGGGTGATCCTCTCTCAACTCATGAATAGCCACCGACCCGCTGTCAACACCTCTGC  
TCGTTCTTACATGCTGACTACTACCCCTCATAATCCTAGCAAGCCAAAACCATACCA  
CCTCAGAGCCTGTCAACCGCCAACGCATGTATATCACACTTCTAACCTCCTCCAATT  
TTTTCTGATCCTAGCATTTAGCGCCACTGAACTAATTATGTTTTATGTTATATTTGAG  
GCCACCCTTATCCCCACTTTAATTATTATTACCCGCTGAGGAAACCAGACAGAACGT  
TTAAACGCAGGAACCTACTTCCTCTTCTACACACTAGCAGGCTCCCTACCCCTCCTTG  
TTGCCCTTCTCCTTCTGCAAAACACAACAGGCACTCTATCCCTACTAACCTCCACTA  
TGCAAACCCCTACAATAATGTACACGCAGACAACTCTGATGAGTGGGCTGCCTTC  
TAGCCTTCCTAGTCAAGATACCTCTTTATGGGGTACACCTATGACTCCCTAAAGCAC  
ACGTTGAAGCCCCCATTGCAGGCTCAATAATCCTTGACGCCGTTCTCCTTAAATTAG  
GGGGATACGGAATAATTCGCGTAATACCAACCCTAGAGCCCCTAACCAAGGAACTA  
AGTTACCCCTTTATTATCTTTGCACTTTGAGGTGTAATTATAACTGGCTCCATTTGCC  
TCCGCCAGACCGATCTAAAATCACTAATTGCTTACTCCTCTGTTAGTCACATAGGCC  
TTGTGGCTGGAGGAATCCTCATCCAGTCGCCCTGAGGCCTGACAGGTGCGCTTACCC  
TTATAATTGCCACGGCCTAACTTCCTCCGCCCTCTTTTGCCTAGCAAATACTAATTA  
TGAGCGAACCCACAGCCGAACAATGGTCCTAGCACGCGGCCTTCAAATAGCGCTTC  
CTCTGATGGCAACTTGATGATTTATTGCCAGCCTAGCTAACCTCGCTCTCCACCTCT  
ACCAATCTTATGGGAGAACTAATAATTATCACTTCTTTATTTAACTGGTCTTGATGA

ACCCTAGCACTCACAGGTGCAGGCACCCTAATTACAGCTGCTTATTCTCTCTATATA  
TTTTTAATAACCCAGCGGGGCCCCCTCCCAACACATGTTATAGCACTTAACCCCTCA  
CACACTCGAGAACACCTTCTCATCGCCTTCACCTCACTCCCTTAGTCCTATTAATACT  
CAAACCCGAACATAATCTGAGGCTGAACTGCTTATGACCCCCACACATTTTGCCTTTT  
CCTCAGCCTTTATCTTAGGCCTGACAGGCCTGGCATTCCACCGGTCCCATTACTGTC  
TGCCCTTTTATGCCTTGAAGCAATAATATTGTCCCTATTTGTTGCCCTCTCCCTGTGA  
ACACTTCAACTAGACTCCACTAATTTCTCAACATCCCCCATGCTTCTCCTCGCATTTT  
CAGCCTGTGAAGCAGGCGCTGGCCTGGCCTTACTAGTTGCTACTGCCCGCACCCACG  
GGACTGATCGCCTACAAAGCCTAACTTACTACAATGCTAAATGCAGCCCCTTCTC  
TAATGATCTCGTCAAGTTTAATCACCATTTTTATGCTGTAAAGCTACCCATTACTTAC  
CGCACTCCTTCTACCCCTCGGAGTTCCGATTGGTCTACTTCCCACGTCAAAACAGC  
AGTAAAAATAGCCTTCTTTGTTAGTCTTCTCCCTCTAGCCCTCTTTTTAAATGAAGGC  
GCAGAAACAATCGTTACAACTGAACATGAATAAACACACACTCCTTCGACATTAG  
CATCAGCCTAAAATTCGATTTTTACTCAATTATTTTTACACCTATTGCCCTCTATGTG  
ACATGATCCATCTTAGAGTTTGCATCCTGATATATACACTCTGACCCCTATATAAGC  
CGTTTCTTTAAATACCTCCTCACCTTTCTAATTGCTATAATTATCTTAGTAACCGCAA  
ACAACATATTTCAACTTTTTATCGGCTGAGAAGGCGTAGGCATTATATCGTTCCTTCT  
TATTGGGTGATGGTACGGCCGAACAGATGCAAATACTGCAGCCCTCCAAGCTGTTTT  
ATATAACCGGGTAGGAGATATCGGACTTATCTTCGCCATGGCTTGAATAGCAACGA  
ACTTAAATTCCTGGGAAATGCAGCAAGTGTTGCAAGCTCCAAAGGCATAGACCTG  
ACTTACCCCTTCTTGGGCTAATCATTGCAGCCACTGGAAAATCAGCCCAATTTGGG  
CTCCACCCTTGGCTGCCATCCGCCATAGAGGGCCCTACACCGGTGTCTGCCCTACTT  
CACTCCAGCACCATAGTCGTTGCCGGTATTTTTTTTACTGGTGCGAATGAGCCCCCTCC  
TGGAGGATAACCCCACTGCCCTGACAGTCTGCCTGTGCCTCGGAGCTTTAACCACCC  
TATTTACTGCCACATGTGCTTTAACTCAAAACGACATTAATAAAAAATCGTTGCATTTT  
CCACATCAAGCCAACTAGGGTTAATAATAGTAACCATCGGCTTAAATCAACCACAA  
TTAGCATTCCTTCACATCTGCACACACGCCTTTTTTAAAGCCATACTATTCTTGTGCT  
CCGGATCTATTATCCACAGCCTAAACGACGAGCAAGACATCCGAAAAATAGGGGGT  
ATACACCACCTTACGCCCTTACATCTTCATGTCTGACTATCGGAAGCCTCGCCCTTA  
CGGGTACACCCTTCTAGCGGGCTTCTTTTCAAAGACGCCATTATTGAAGCACTAA  
ACACATCCCACCTAAACGCCTGAGCCCTCACCTCACTCTCCTAGCCACCTCTTTTAC  
AGCAATCTACAGCTTTCGGGTAGTATTCTTTGTCCCCATGGGTCATCCACGATTTAAC  
CCCTTTCCCCCATTAATGAGAACAACCCGGCAGTCATCAACCCACTTAAGCGGTAG  
CCTGGGGAAGTATTCTCGCAGGACTGCTTATTACCTCTAATATTACGCCTTTAAAGA  
CCCCAGTTATGTCAATACCCCTAACCCTTAAATTAGCCGCTCTTCTGGTCACGATCGT  
TGGCCTTCTTATTGCCCTAGAACTTGCCATATTAACCAACAAACAATTTAAAGCAAC  
ACCCATTCTTACACACACAACCTTCTCAAATATACTTGGCTTCTTCCCTGCCATCGTTC  
ACCGCTTAACCCCTAAGCTAGCCCTAACTCTTGGCCAAGGTATTGCCAGTCAAATAA  
TGGACCAAACCTGATTAGAAAAAACTGGCCCTAAAGCCATCACATCCCTAAGCCTC  
CCCATAGTTACCATAACAAGCAACATCCAACAAGGCATGATTAAAACATATCTTTTC  
TTTTTGTCTAACTCTCGCCCTTATAATTGCCATGCTATTTGCCTAATGACCTTTATTA  
TATATTTGATTTTATTTTGTCTTAGGTTTAGTTGCGGTTGCTTCTAACCCTCC  
CCCTACTTTGCTGCCTTAGGGTTGGTTGTGGTGGCTGGGATGGGGTGTGGGCTACTA  
GTTGGGTGTGGAGGGCCTTTTTTATCGTTAGTGCTTTTTTTTAAATTTACTTGGGCGGGA  
TGTTAGTTGTGTTTGTCTATTCAGCAGCATTGGCTGCTGAGCCATAACCCGAGAGTT  
GAGGGAATCGGGAAGTTTTAACTTATGGTACTTTATGCGGGAGGGGTTGTGTAATCT  
CTGCGTTGTTTTGAGGGGGGTGGTATGAGTCTTCATGAGTGTTAGTAGATAATTTTA  
ATGAGTTTTCTGTGTTTCGTGGGGATGTGGGTGGTGTGCTTTAATACTCTTCTGG

GGGTTGGATATTAATTATTAGTGCGTGGGTTCTTTTTTTAACTCTGTTTGTAGTTTAA  
GAATTAACCGGGGTATAAGTCGGGGGGCCCTTCGACTGTTT"/>

<sequence id="seq\_Pleuronichthys\_japonicus\_KY038655" spec="Sequence"  
taxon="Pleuronichthys\_japonicus\_KY038655" totalcount="4"  
value="ATGACACTAAGCCTATTTGACCAATTTGAATCACCTGTACTATTTACATCCC  
TCTAATTGTACTAGCAATTGCCCTCCCATGAGTACTATTCCCTGCCCCCTGGACCCGAT  
GAATTAGTAACCCCTACTAGCATTTCAAGGATGATTTGTTAAACACTTCACCTCAC  
AAATTCTTCTCCCACTAAATACACCCGGGCATAAATGAGCACTTCTCTTCGCCTCCCT  
CATCTTTTCTTTCTCTATCAATGTGCTCGGGCTTCTTCCTTACACCTTTACACCTACTA  
CTCAACTATCTTTTAACTTAGGACTTGCAGTACCCCTCTGACTAGCAACAGTAATTAT  
GGGATGCGCACCCAGCCAACACACGCATTAGGACACCTCTTGCCTGAAGGCACCCC  
AACTGCTTTAATTCCTGTACTCGTTATTATCGAAACAATTAGTCTGTTTATTCGCCCT  
ATTGCTCTAGGTGTCCGATTAACAGCAAACCTAACAGCAGGCCACCTCCTGATTCAA  
CTTATCTCAACAGCTACTTTTCGTTCATGCTCCCGATTATGCCTACTGTTGCTATTTTAA  
CCACAACACTTCTGCTTCTTCTTACCCTCCTAGAAATTGCTGTTGCTATAATTCAGGC  
TTATGTCTTTGTCTTACTCCTAAGCCTTTACCTACAAGAAAACGTCTAATGCCTCAAC  
TCAACCCCGGCCCTTGATTTTTTCATCTTAGCTGTTTTATGACTTTTATTTCTATCTCTC  
GCACCCCGAGTACTTTTAAAATACCTCTTCCCTAACAAAATAACACCCGAAGGAAA  
GTTAGAACAACCATTAACCCTGAACCTGACAATGACACTAAGTGGCAATCACACGT  
TGATTCTTCTCAACCAATCACAAAGACATCGGCACCCTCTATCTTGTATTTGGTGCCT  
GAGCCGGAATAGTGGGAACAGCCCTAAGTCTACTCATTCGAGCAGAACTGAGCCAA  
CCCGGAGCCCTTCTTGGGGACGATCAGATTTATAATGTTATCGTCACTGCACACGCC  
TTTGTAAATAATCTTCTTTATAGTAATACCAATCATGATTGGAGGATTTGGAAACTGG  
CTTATTCCCCTAATGATTGGGGCGCCTGATATAGCCTTCCCTCGAATAAATAACATG  
AGCTTCTGGCTTCTACCACCATCTTTCCTCCTTCTCCTCGCTTCTTCAGGAGTTGAAG  
CCGGCGCCGGTACAGGGTGGACAGTGTATCCCCCTCTGGCTGGTAACCTGGCACATG  
CCGGAGCATCCGTAGACCTTACAATCTTTTCACTTCACCTCGCAGGAATTTTCGTCAA  
TTCTAGGGGCCATCAACTTCATTACTACTATTATTAATATAAAACCCACGGCTATAA  
CTATATACCAAATCCCCTACTTTTGTGTTGAGCCGTACTAATTACAGCTGTTCTACTGCT  
TCTTTCTCTCCCAGTTTTAGCCGCTGGTATCACAATGCTTCTAACGGATCGTAACCTC  
AACACAACCTTTCTTTGACCCTGCTGGAGGGGGTGATCCCATTCTTTACCAACATTTAT  
TCTGATTCTTTGGTCACCCGGAAGTGTATATTCTAATTCTCCCAGGTTTCGGAATAAT  
TTCACACATTGTTGCCTATTATGCAGGCAAAAAAGAACCCTTTGGTTACATGGGGAT  
GGTCTGAGCTATAATAGCAATTGGCCTCCTTGGATTTATCGTCTGAGCCCACCACAT  
GTTTACGGTTGGCATGGATGTTGACACACGTGCATATTTTACATCCGCCACAATAAT  
TATTGCAATTTCCCACTGGTGTAAGTATTGAGTTGACTCGCTACACTTCATGGAGG  
TGATATTAAATGGGAAACACCCCTACTATGAGCACTTGGTTTTATTTTCTATTTTACA  
GTGGGAGGCCTAACTGGAATTGTTTTAGCTAATTCATCACTAGACATTGTTTTACAT  
GACACATACTATGTCGTAGCCCACTTTCACTACGTCTTATCTATGGGTGCTGTCTTCG  
CCATTGTTGCTGCTTTCGTTCACTGATTCCCCCTATTTACAGGCTATACTCTCCACGA  
AACATGAACTAAAGTTCATTTTGGCGTAATGTTTCGAGGAGTAAATTTAACATTCTT  
CCCACAACATTTCTTAGGCCTAGCCGGAATACCCCGACGATACTCAGATTACCCAGA  
TGCCTTTACTCTGTGAAACACAGTTTCATCATTTGGCTCCCTAGTATCCCTAGTTGCC  
GTAATTATGTTTTTATTTATTATTTGAGAAGCATTTACAGCCAAACGAGAAGTTCAA  
TCGGTAGAACTAACCGCAACTAATATTGAATGGCTTCACGGCTGCCCCCGCCTTAT  
CACACATTTGAAGAACCTGCATTTGTTTCAGGTACGCATAGACTAAATGGCCCATCCC  
CTACAACCTGGATTTCAAGATGCAGCTTCACCACTAATAGAAGAATTACTTCACTTT  
CACGACCACGCCCTGATAATTGTTATTCTTATTAGCGTAATAGTACTTTACATTATTG

TAGCCATGGTTACAGCTCAATTTACGGATAAACTTGTGCTTGACTCCCAAGAAATCG  
AAATTATCTGAACAATTCTCCCAGCTATTATTCTTATTCTTATTGCCCTACCATCTCT  
CCGAATTTTATATCTAATAGACGAAATCAACAGCCCCACCTTACAGTAAAAGCTTT  
AGGTCACCAAGTGGTACTGGAGCTATGAATACACAGACTACGATGACCTTGGCTTTGA  
CTCATACATAATCCCCACGCAAGATCTCAGCTACGGCCAATTCCGACTTTTAGAAGC  
AGACCACCGCATAGTAGTCCCTGTAGAATCCCCCGTTCGAGTTTTAATTACCGCCGA  
AGACGTCCTTCATTTCGTGAGCAGTGCCAGCCCTAGGCACAAAAGTCGATGCTGTTCC  
GGGACGACTAAACCAAGCAACTTTTACCATTAGCCGGCCAGGCGTATTCTTTGGTCA  
ATGCTCTGAAATTTGCGGAGCCAATCACAGCTTCATGCCAATTGTTGTAGAAGCAGT  
TCCCCTTGAACACTTCGAATCCTGATCTTCATTAATAATTGAAGAAGCCTATGGCCC  
ATCAAGCACACCCATTTTCACATAGTCGACCCCAGCCCCTGGCCCCCTTACAGGTGCCA  
TTGCTGCCCTACTAATAACGTCCGGCCTTGCTATCTGATTTCACTTCCACTCTACGAC  
CCTTATAACTTTAGGAACAATTCTTCTTATTTTAAACAGCTTTCCAATGATGGCGAGAC  
GTTGTCCGAGAGGGTACCTTTCAAGGTCACCACACCCCACCAGTCCAAAAAGGGCTT  
CGATATGGTATGATCCTCTTCATTACCTCAGAAGTTCTCTTCTTCTCCTCGGCTTTTTCTG  
AGCTTTTTATCACTCAAGCCTAGCACCCACCCCTGAACTAGGCGGCTTCTGACCACC  
CGCTGGTATTACCCCTTTAGACCCCTTCGAAGTACCCCTACTCAATACAGCAGTCCTT  
CTTGCCCTCAGGCGTTACAGTTACATGGGCACACCACAGCATTATAGAAGGGCAACG  
AAAACAAGCCCTTCAATCCCTCGCACTTACAATTTTACTTGGAGGCTACTTTACCTTC  
CTCCAAGCCCTCGAGTACCATGAAGCCCCCTTTACTATTGCAGACGGGGTGTATGGT  
GCCACATTTTTTTGTGGCTACTGGCTTTCACGGCCTCCATGTGTTAATTGGCTCTTCAT  
TTTTAGCTGTTTGCTTTCTCCGCCAAGCCCTTCACCATTTTACATCAAACCATCATTTT  
GGGTTTGAAGCAGCCGCATGGTATTGACATTTTCGTAGACGTCGTCTGACTTTTCCTCT  
ACATCTCCATTTACTGATGAGGATCCTAATGGCCAGCCTACGAAAGTCCCACCCCT  
TTTAAAAATCGCAAACCATGCTTTAGTCGATCTCCCATCCCCCTCCAACATCTCTGTT  
TGATGAAATTTTGGATCCCTTCTAGGACTCTGCTTAATTATCCAAATCGTAACAGGC  
CTTTTCTTAGCCATGCATTATACTTCGGATATCGCAACCGCTTTTACCTCCGTAGCCC  
ACATTTGCCGAGACGTCAACTACGGCTGATTAATTCGAAATGTTACGCCAACAGCG  
CATCATTCTTTTTTATTTGCATCTACCTTCACATTGGCCGAGGCCTCTATTACGGCTC  
GTACCTACAAAAAGAAACATGAAACGTTGGGGTAGTTCTTCTCCTACTCGTCATGAT  
AACAGCCTTTGTTGGCTATGTCCTCCCCTGAGGTCAAATGTCATTTTGAGGTGCAAC  
CGTCATTACTAACCCTTCTCTCTGCTGTACCCTACGTCGGCAACACCCTAGTTCAATGA  
ATCTGAGGGGGATTTTCTGTAGACAATGCTACTCTCACCCGATTCTTTGCATTTCACT  
TCCTTTTCCCCTTTATTATTGCAGCTGCAGCAATCATTCATTTGCTTTTCTTACACGA  
AACAGGCTCAAACAACCCACAGGCCTTAACTCAGACTCTGACAAAAATCCCCTTTCA  
TCCCTATTTTTTCGTATAAAGACCTCTTGGAATTCGCCATCCTCCTCACTGCCCTAGCAT  
CCCTTGCCCTATTCTCTCAAATCTCTTGGGCGACCCCGACAACCTTCACCCCGCAA  
ACCCACTTGTACACCCCCCTCACATTAAGCCAGAATGGTATTTCTGTGTTGCATATGC  
TATTCTACGCTCTATTCTTAACAAATTGGGAGGAGTACTTGCTCTATTGTTTTCTATC  
CTGATCCTGATACTTGTACCCCTCCTTCACACATCTAAACAACGAAGTCTAATATTCC  
GCCCCTTCTCGCAATTCCTATTCTGATCCTTAGTAGCAGATGTAATGATCCTTACCTG  
AATCGGGGGCATGCCCCGTTGAACACCCCTTTGTTATTATTGGACAAATCGCATCATT  
TCTCTACTTCTTCTTCTATTCTTGGTATTAATCCCTTTAACAGGTTGACTGGAGAATAAA  
GCATTAGCTTGAAAATATGATTTTCGACCCTTATTACACATGTTTTTAACCCCTGCTA  
TTCATTGTTCTGTATTATTAGCCGTAGCATTCTTCACCTTACTTGAGCGTAAAGTTC  
TTGGCTACATGCAACTCCGAAAAGGACCAAATGTCGTAGGACCCTACGGCCTTCTTC  
AACCCATCGCCGACGGCATTAAAGCTATTTATTAAAGAGCCCGTACGACCCTCCACCG  
CTTCTCCCGTTCTCTTTATTCTTGCTCCCATGCTCGCACTCACTCTAGCTCTTGCACTT

TGAGCCCCCATACCTCTCCACACCCTATGACTGACCTCAACCTCGGCATCTTATTTG  
TTTTAGCATTGTCCAGCCTTGCAGTTTACTCCATCTTGGGGTCAGGCTGAGCATCAA  
ACTCAAAGTATGCACTCATCGGGGCCCTCCGAGCTGTTGCACAACTATTTCCCTACG  
AGGTCAGCCTAGGCCTCATTTTACTTAATATTATTATTTTTCCGGTAGCTTCACTCT  
TCAAACCTTTAACACAACCCAAGAAGCCATCTGACTAATTGTTCCCTGCTTGACCTTT  
AGCTGCCATGTGATATGTTTCTACCCTGGCTGAGACAAACCGGGCACCTTTTGACCT  
AACAGAGGGCGAATCTGAACTTGTTTCCGGATTTAATGTAGAGTATGCAGGCGGAC  
CCTTCGCTTTGTTTTTCTGGCTGAATACTCTAATATCCTTCTGATGAATACCCTATCT  
GCAGTATTGTTCTTGGGGGCTTCTCATATCCCGACCATGCCAGAATTGACAAGCATT  
AATCTTATAACCAAAGCCGCTCTTCTCTCAGTAGTGTTCCCTGTGGGTTTCGAGCCTCAT  
ACCCTCGATTTTCGTTATGACCAACTTATACACCTTACCTGAAAAAGCTTCCTTCCCCT  
CACACTCGCATTAGTTATTTGACATTTGGCCCTCCCTATTGCATTTGCGGGCCTTCCA  
CCACAATTGTAGATGAATCCTTACATCTTAACCACTCTTCTATTTGGCTTAGGCCTTG  
GCACAACACTTACATTTGCAAGCTCCCACTGACTCCTTGCTTGAATGGGCCTTGAAA  
TTAATACTCTCGCTATCCTCCCCCTTATAGCCCAACACTACCACCCTCGAGCAGTTGA  
AGCCACCACTAAATATTTCTCACACAAGCTGCAGCAGCCGCTACCCTTCTTTTTGC  
AACTATAACTAACGCTTGACTTACGGGGCCAATGGGATATTCAACAAATGACTCACCC  
CCTCCCAACAACAATAATTATTGTTGCTCTAGCACTAAAAATTGGCCTTGCAACAGT  
ACACTCCTGACTACCAGAAGTTCTTCAAGGCCTAGACCTCACCACTGGACTAATCCT  
CTCTACTTGGCAAAAACCTTGCCCCCTTTGCTCTTCTCATGCAAATTCAAACCACAACC  
CCACCCCACTTATTATTATGGGCTTGCTTTCTACCTTGGTGGGAGGCTGAGGCGGCC  
TAAACCAAACCTCAACTACGCAAAATTCTTGCTTACTCCTCAATTGCCCACCTTGGCT  
GAATAGTCTTAATTCTCCAGTTCTCACCTACCCTTACCCTCCTCACACTTCTCACATA  
TATCCTATAACTCTATCAATATTTTTAGTTTTCAAGATAAATAAAGCCACCACCATTA  
ATGCCCTTGCTATCTCCTGATCTAAAACCCAGCCCTTACAGCGCTAACCCCTCTTAT  
CCTGCTCTCTCTTGGCGGCTTACCCCCCTCTACGGGCTTTATACCAAAATGACTTATT  
CTTCAGGAGTTTACCAAGCAAGATTTACCTTTCTTGCCACCCTCGCCGCACTTACTGC  
TCTCCTCAGCCTCTACTTCTACTTGCGCCTCTCCTATGCCATAACACTCACCATGTTT  
CCTAATAATCTTGTAGGTGCAACCCCTGGCGACTCCACAACCTCTCAGCTTACCCTC  
CCTCTCGCCACAACCTACCACAGCAACTATCCTTCTTCTTCCATTAGCCCCCGCTGCTT  
TAGCACTACTCACCACTATGAACCTTCTCCTAACTATCGTTACAATCACAGCTCTTC  
TGTCTATAATTCTCATAATTGTCTCTTTTTGGCTCCCCCAAATGACACCCGATTATGA  
AAAACCTTTCACCATAACGAATGCGGCTTTGACCCCGTAGGTTTCGGCCCGATTACCTTT  
TTCCTGCGATTTTTTCTGATCGCCATCCTCTTTCTTCTTTGATCTAGAAATTGCTC  
TCCTTCTTCTCTCCCCTGAGGGGACCAACTAACATCGCCGTTGTTAACATTTCTGTG  
AGCCACAGGCGTCCCTTTCCCTCCTGACCCTTGGCCTCGTGTACGAATGAATTCAAGG  
GGGCCTAGAGTGGGCTGAGTATGCTAATAATCTTGATCCCAACACTGATGCTAATCC  
CAACAGCTTGACTAACCAAACCAACTTGGTTATGACCAACAACCTTTAACACATAGCT  
TTTGCATCTCCTTAGTTAGCTTGTTATGATTAAAAAACATCTCAGAGACCGGGTGAT  
CCTCACTCAACTCATGAATAGCTACCGACCCACTATCAACACCCCTGCTCGTTCTCA  
CATGTTGGCTGCTGCCCTTAATAATCCTAGCAAGCCAAAACCACACCACCTCAGAAC  
CAGTTAACGCCAACGTATATACATCACACTTCTAACCTCCTCCAATTCTTTCTCATC  
CTAGCATTTAGCGCGACTGAACTAATTATATTTTATGTCATGTTTGAAGCTACCCTCA  
TTCCCACTTTAATTATTATTACACGCTGAGGAAACCAAACAGAGCGTTTAAACGCAG  
GCACCTACTTCCTCTTCTACACACTAGCGGGCTCATTACCCCTTCTTGTCGCCCTTCT  
CCTATTGCAAAACACAACAGGTACCTTATCACTTCTAACCTCCTCACTACGCGGACCC  
TTACAATGATGTCGCACGCAGACAACTCTGATGAGTAGGCTGCCTCCTCGCCTTCC  
TAGTTAAAATACCTCTTTATGGAGTACACCTTTGACTCCCCAAAGCACACGTTGAGG

CCCCATTGCAGGCTCAATAATTCTTGCAGCCGTCCTCCTTAAATTAGGAGGGTATG  
GAATAATTCGTGTAATACCAACCCTGGAACCCCTAACCAAGGAACCTAAGTTATCCCT  
TTATTATCTTTGCACTCTGGGGTGTATTATAACTGGCTCCATTTGCCTCCGCCAAAC  
CGATCTCAAGTCACTAATTGCCTACTCATCTGTTAGTCACATAGGCCTTGTGGCAGG  
AGGAATCCTCATCCAATCACCTTGGGGCCTTACAGGTGCACTTACCCTTATAATTGC  
CCACGGCCTGACTTCCTCCGCCCTCTTCTGCCTAGCGAATACTAATTATGAACGAAC  
CCACAGCCGGACAATGGTCCTAGCACGCGGCCTTCAAATAGCACTTCCTTTAATAGC  
AACTTGATGGTTTATTGCCAGCCTAGCTAATCTAGCCCTCCCACCTTTACCCAATCTT  
ATAGGAGAACTAATAATTATTACCTCTTTATTTAACTGATCTTGATGGACTCTAGCA  
CTTACAGGGGCCGGCACCTTAATTACAGCTGCTTATTCCCTCTACATATTCTTAATAA  
CCCAGCGAGGCCCCCTCCCAACACATATTATAGCACTTAGCCCCCTCACATACCCGAG  
AACATCTTCTCGTTGCCTTCACCTCGCCCCCTTGGCCCTATTAATTCTCAAACCCGAG  
CTGATCTGACGCTGAACTGCTTATGACCCCTACACATTTTGCCTTTTCTCAGCCTTT  
ATTTTAGGCTTAACAGGCCTGGCATTCCACCGGTCTCATCTACTATCTGCTCTTTTAT  
GCCTTGAGGCAATAATACTATCTCTATTTGTTGCCCTTTCACTATGAACACTTCAACT  
AGATTCCACCAATTTCTCAACGTCACCCATGCTTCTACTCGCATTTTCAGCCTGCGAG  
GCAGGTGCTGGTCTAGCCCTACTAGTTGCTACTGCCCCGACCCCATGGGACCGATCGC  
CTACAAAGCCTAAACTTACTACAATGCTAAATGCAGCCTACTTCTCTAATGATCTCA  
TCAAGTTTAGTTACCATTTTTATGCTGTAAAGCTACCCGTTACTTACTGCACTCCTTC  
CTACTCCTCGAGGTTCCGATTGATCCACCTCTCACGTCAAAACAGCAGTAAAGATAG  
CCTTTTTTGTAGCCTTCTCCCCCTAGCCCTCTTTTTAAATGAAGGCGCGGAAACAAT  
CGTTACAAATTGGACATGAATAAATACTCACTCCTTCGATATTAGTATCAGTCTAAA  
ATTCGACTTTTACTCAATTATTTTCACACCCATCGCCCTCTATGTAACATGATCCATC  
CTAGAATTTGCATCCTGGTACATGCACTCTGACCCCTACATAAGCCGTTTCTTTAAAT  
ACCTCCTTACCTTCCTGATTGCTATAATTATTTTAGTAACCGCAAACAACATATTTCA  
ACTTTTTATTGGCTGAGAAGGCGTAGGCATTATATCGTTCCCTCCTTATCGGGTGATG  
GTATGGTCGGACAGATGCCAACACTGCAGCCCTCCAAGCTGTTCTCTACAACCGGGT  
AGGGGACATCGGACTTATCTTCGCCATGGCTTGAATGGCAACAACTTAAATTCCTG  
GGAAATACAGCAAGTGTTGCAAGCTCCAAGACATAGACTTGACTTACCCCTCCT  
CGGGCTAATCATTGCAGCCACCGGGAAATCAGCCCAATTTGGGCTCCACCCTTGGCT  
GCCGTCCGCCATGGAGGGCCCCACACCGGTGTCTGCCCTACTTCACTCCAGCACTAT  
GGTCGTTGCCGGTATCTTCTTACTGGTGCGAATGAGCCCTCTTCTAGAAAATAACCC  
TACCGCTCTTACAGTCTGCCTGTGCCTCGGAGCCCTAACTACCCTCTTTACCGCCACA  
TGTGCTTTAACCCAAAACGACATTAAAAAAATCGTTGCATTCTCCACATCAAGCCAA  
CTTGGGTAAATAATGGTTACCATCGGCCTAAACCAACCACAGTTAGCATTCTTTCAT  
ATTTGCACACACGCCTTTTTTAAAGCCATATTATTCTTGTGTTCCGGGTCTATTATTC  
ACAGCCTAAACGACGAGCAGGACATCCGAAAAATGGGAGGTATACATCACCTTACG  
CCCTTTACATCTTCATGCCTGACTATCGGGAGCCTCGCCCTTACAGGTACGCCTTTCC  
TAGCCGGCTTCTTCTCAAAAGACGCCATTATCGAAGCACTAAACACATCCCACCTAA  
ACGCCTGAGCCCTCACCCTCACTCTCCTAGCCACCTCTTTCACAGCAATCTACAGCTT  
TCGAGTAGTATTTTTTGTTCCTATGGGTCATCCACGGTTTAACTCCTTTCCCCCATTA  
ATGAAAATAACCCAGCAGTAATCAACCCACTTAAACGCTTAGCCTGGGGAAGTATT  
CTTGCAGGACTGCTTATTACCTCAAATATTACACCTCTAAAAACCCCATTTATGTCA  
ATACCCCTAACCCTTAAATTGGCTGCTCTTATGGTTACAATTGTTGGGCTTCTTATTG  
CCCTGGAACCTCGCCGCACTAACCAATAAACAATTTAAAGCAACACCCATTCTTACAC  
ACATAACTTCTCAAATATGCTTGGCTTCTTCCCAGCTATTGTTACACCGCTTAAACCCCT  
AAGCTAGCCCTCACCCTTGGCCAAGGTATTGCCAGTCAAATAATAGACCAAACCTG  
ACTAGAAAAGACGGGCCCTAAAGCCATCACATCTCTAAGCCTCCCCATGGTTACCAT

AACAAGCAACATCCAACAAGGCATGATTAACATATCTTTTCTTTTATTCTAACT  
CTTGCCCTTATAGTTGCCATACTATTTGTTTAATGACCTTTATTATATATTTAATTCTA  
TTCTGTTTTGTACTAGGTTTAGTCGCGGTTGCTTCTAACCCTTCTCCTTACTTTGCTGC  
CTTAGGGTTAGTTGTGGTAGCTGGGATGGGGTGTGGAATATTAGTTGGGTGTGGAGG  
GCCCTTTTATCGCTAGTGCTTTTTTTAATTTATTTGGGAGGGATATTAGTTGTATTTG  
CATATTCAGCAGCGTTGGCTGCTGAGCCGTACCCTGAAAGCTGAGGAAATCGGGAA  
GTTTTAACTTATGGTACTTTATGCGGGTGGGGTGTGTAAATTTCTGCGTTGTTTTGAG  
GGGGGTGGTATGAGTCGTCGTGGGTGCTAGTAGATAACTTCAATGAGTTTTCTGTGT  
TCCGTGGGGATATGGGCGGTGTTGCTGTAATACTCTTCTGGGGGTGAATGTTAA  
TTATTAGTGCCTGGGTCTCTTTCTAACTCTGTTTGTGGTTCTAGAATTAACCGGGT  
ATAAGTCGAGGGACCCTCCGACTGTCT"/>

<sequence id="seq\_Pseudopleuronectes\_herzensteini\_MW713061"  
spec="Sequence" taxon="Pseudopleuronectes\_herzensteini\_MW713061" totalcount="4"  
value="ATGATACTAAGCTTCTTTGACCAATTTATGTCCCCCGTATTCCTGGGCATCCC  
ACTAATTGCACTAGCAATTACACTGCCTTGAACGCTCTTTCCAGCCCCCGTATTCGCT  
GACTAAACAACCGCCTAATCTCGCTCCAAGGGTGATTTATTAGCGGCTTTACCTCAC  
AACTTCTTCTTCCCCTAAATCCCCGGAGGCCACAAATGAGCACTTCTATTGCGCTCGCT  
AATCTTTTCTTCTTCTATTAACATGCTTGGCCTCCTTCCGTACACATTTACACCTACC  
ACTCAACTCTCGCTTAACCTCGGCCTTGCGGTCCCACTCTGGCTGGCAACTGTCATC  
ATGGTATGCGAAACCAACCAACAATCGCCTTAGGCCACCTTCTTCCAGAAGGGACTC  
CTACCTCCTGATCCCCGTACTAATTATTATCGAAACAATTAGCCTATTTATTGACCT  
CCTTGCTCTGGGGGTCCGACTTACAGCTAACCTCACAGCGGGCCACCTCCTCATCCA  
ACTCATTGCAACAGCTGCCTTCGTTCTTCTCCCGCTTATACCTGTTGTTGCTATTTTA  
ACAACAACGGTTCTTCTCCTCCTCACTCTTCTCGAAGTTGCCGTTGCTATAATTCAAG  
CCTATGTCTTTGTCTACTTCTAAGTCTTTACCTACAAGAAAACGTTTAATGCCTCAA  
CTGAACCCCGCACCCCTGATTTGCAATTTTGGTTTTCTTGAATAATCCTTTTAACTG  
TCATTCCCCCAAAGTTTTAGCTCACACTTACCCCAATGAGCCAACCTCCCAAAGCA  
CACAAAAACAAAACAGAACCCTGAAACTGACCATGATACTAAGTGGCAATCACACG  
TTGATTTTTCTCGACCAATCACAAAGACATCGGCACCCTCTATCTTGTATTTGGTGCC  
TGAGCCGGAATAGTGGGGACAGGCCTAAGTCTGCTCATTGAGCAGAGCTAAGCCA  
ACCTGGGGCTCTCCTGGGAGACGACCAAATTTATAACGTAATCGTCACCGCACACGC  
CTTTGTAATAATCTTCTTTATAGTAATACCAATTATGATCGGAGGGTTTCGGAAACTG  
ACTTATTCCATTAATAATTGGGGCCCCCGATATGGCCTTCCCTCGAATAAATAACAT  
GAGCTTCTGACTTCTACCCCCATCCTTTCTCCTTCTTCTAGCCTCTTCAGGCGTCGAA  
GCCGGGGCGGGGACAGGATGAACCGTGTACCCCCACTAGCTGGAAATCTAGCACA  
CGCCGGAGCATCCGTAGACCTACCATTTTTCTCTCTTCTTGCCTGGAATTTCTTCA  
ATTCTAGGGGCAATCAACTTTATTACCACTATCATCAATATGAAACCAACAGCAGTC  
ACTATGTACCAAATCCCACTATTTGTCTGGGGCGTACTAATCACCGCCGTCCTTCTTC  
TTCTTTCCCTACCCGTTCTGGCCGCTGGCATCACAAATGCTACTGACAGACCGCAACC  
TAAACACAACCTTCTTTGACCCTGCCGGAGGGGGTGACCCCATCCTTTACCAACACC  
TATTCTGGTTCTTTGGCCATCCAGAAGTCTACATTTTAATTCTCCAGGCTTCGGGAT  
GATTTCTCACATTGTTGCATACTATGCAGGTAAGAAAGAACCCTTTGGCTACATGGG  
GATGGTCTGAGCTATAATGGCTATCGGACTCCTGGGCTTCATTGTATGGGCCCATCA  
CATGTTACAGTCGGAATAGATGTGGACACACGGGCCTATTTTACCTCTGCCACAAT  
AATTATTGCCATCCCAACCGGCGTAAAAGTCTTTAGCTGACTCGCAACCCTTCATGG  
AGGAAGCATTAATGAGAAACCCCACTCCTGTGGGGCCCTAGGCTTTATTTTCCTATT  
CACAGTGGGGGGTCTTACTGGTATTGTCTTAGCTAACTCGTCTCTTGACATTGTCCTT  
CATGACACATACTATGTAGTAGCCCACTTCCATTATGTCTTATCTATGGGGGCTGTCT



TTGCGATCGTTGCCGCCTTCGTACACTGATTCCCACTATTTACAGGCTATACCCTCCA  
CTCCACATGAACGAAAGTCCACTTTGGCCTAATGTTTGTGGGGGTCAACCTCACATT  
CTTCCCCAACATTTTCTGGGTCTCGCCGGAATGCCTCGACGGTATTCAGACTACCC  
GGACGCATACACCCTTTGAAATACTGTCTCATCGATCGGCTCACTAATGTCGCTCGT  
CGCTGTGATTTTATTTTGTATTATTGAGAAGCATTTACGGCCAAACGAGAAGTC  
GGCGCAGTAGAACTAACTTCAACTAACATTGAATGACTTTACGGCTGCCCTCCACCC  
TACCACACATTTGAGGAGCCCCGCATTCGTTCAAGTTCGTATAAACTAAATGGCACAT  
CCATCACAACCTGGGATTTACAGGACGCAGCTTCCCCCCTTATAGAAGAACTACTTCAC  
TTCCATGACCACGCCTTAATAATTGTTATTCTCATCAGCACCATGGTACTTTATATTA  
TTGTGGCTATGGTCACGGCCCAACTAACCGATAAGCTTGTGTTAGACTCTCAAGAAA  
TTGAAGTTATCTGAACAGTTCTCCAGCTATTATTCTTATTCTCATCGCCCTCCCATC  
TCTCCGAATTTTATACTTAATAGACGAAATTAACGACCCCCACCTGACAATTAAAGC  
CTTAGGACACCAATGATACTGAAGCTACGAATACACAGACTACCAGGACCTCGGTT  
TTGACTCTTACATGGTCCCAACTCAAGACCTAACCCCCGGGCAATTCCGACTACTAG  
AAGCAGACCACCGAATGGTAATTCCTGTAGAATCTCCAATTCGAGTTCTTATCTCAG  
CTGAGGATGTCTTGCACTCATGAGCAGTCCCCTCCCTGGGTGTAAAAGTAGACGCCG  
TGCTTGACGATTAAACCAGGCAACCTTTATTGTTAGCCGACCCGGCGTATTCTATG  
GCCAATGCTCTGAAATTTGCGGGGGCAAACCACAGCTTTATGCCCATCGTTGTAGAGG  
CAGTACCACTTGACCACTTTGAGAAGTGGTCTTCGCTAATAATTGAAGACGCCTATG  
GCCCCCTCAAGCACACCCGTACCACATAGTCGACCCGAGCCCATGACCCCTCACGGG  
GGCTATTGCTGCCCTATTGATAACATCTGGCCTTGCTATCTGATTCCACTTTCACTCC  
ACAACCCTAATAACTATTGGAACCATCCTTCTCATTCTAACAGTCTTTCAATGATGA  
CGAGACGTCGTCCGAGAAGGAACATTTCAAGGACACCACACCCCTCCCGTTCAAAA  
AGGCCTCCGATACGGAATAATCCTATTTATTACATCAGAAGTCCTATTTTTCTAGG  
CTTCTTCTGAGCCTTTTACCACTCAAGCCTAGCACCCACCCCGACCTAGGAGGCTT  
CTGACCACCGGCAGGCATCACACCTTTAGACCCATTCGAAGTCCCACTTCTAAACAC  
AGCAGTACTGCTTGCCCTCCGGCGTAACTGTCACATGGGCACATCACAGCATCATAGA  
AGGTAAACGAAAACAAGCTATTCAGTCTCTCGCTTTAACAATCTTGCTCGGAGGGTA  
TTTCACCTTCCTCCAAGGCCTTGAGTATCACGAAGCCCCCTTCACCATCGCAGACGG  
GGTTTACGGTGCCACATTCTTTGTTGCCACCGGCTTCCACGGACTTCACGTCTTAGTT  
GGTTCATCTTTCTTAGCCGTTTGTCTACTACGCCAAATTCTCCACCATTTTACATCAG  
ACCACCACTTTGGATTTGAAGCAGCCGCATGATACTGACACTTCGTAGACGTCGTCT  
GACTCTTCCTCTATATCTCTATTTACTGATGAGGATCTTAATGGCCAATCTCCGTAAA  
TCCACCCCCCTTCTTAAATCGCAAACGATGCTTTAGTCGACCTCCCAGCCCCCTCC  
AACATTTCTGTCTGATGAAACTTTGGGTCTCTTTTAGGACTCTGCTTAGTAACCCAGA  
TCGCTACCGGCTTATTTTTAGCCATACACTACACATCAGATATTGCTACTGCCTTCAC  
CTCCGTTGCCACATCTGCCGGGACGTCAACTACGGCTGACTTATCCGAAGCATTCA  
TGCCAATGGCGCATCATCTTTTTTTATTTGTATCTACCTTCACATCGGTCGGGGTCTC  
TACTACGGCTCCTACCTCTACAAGGAAACATGAACTATTGGAGTCGTACTGCTACTC  
CTCGTAATGATAACCGCTTTTCGTGCGGATACGTTCTCCCTTGAGGACAGATGTCGTTTT  
GAGGTGCAACCGTCATTACCAACCTACTATCTGCCGTCCCTTATGTTGGGGGCACCC  
TTGTTCAATGGATTTGAGGTGGTTTTTCTGTAGACAATGCCACCCTCACCCGGTTCTT  
TGCATTCCACTTCCTCTTCCCGTTCATTATCGCAGCCGCAACAGTTATTCACCTTCTT  
TTTCTCCACGAACTGGTTCAAACAACCCACCGGCTTAAACTCGGACTCCGATAAA  
GTCCCATTCACCCCTACTTCACATACAAAGACCTCTTGGCTTCGCGGTCTTCTGAC  
TGCACTAGCCTCGCTCGCTCTGTTTTCCCGAACCTTTTGGGAGACCCAGACAACTTT  
ACCCCGCAAACCCCTTGTTACACCCCTCACATCAAGCCAGAGTGATATTCCTC  
TTTGCCTACGCCATTCTCCGCTCCATTCCAAACAAGCTTGGTGGTGTACTTGCCCTTC

TATTCTCCATCCTAGTTCTTATGCTCGTTCCCTTTCTCCACACATCTAAGCAACGAAG  
CTTGATGTTTCGTCCTGTGACACAATTCCTGTTCTGGTCTTTAGTAGCCGACGTAATA  
ATTCTGACTTGAATTGGAGGAATACCCGTTGAACACCCCTTCGTAATCATTGGCCAA  
GTAGCATCCCTCATCTACTTCTCCCTTTTCCTGGTCCTAATCCCTACAGCAGGCTGAA  
TGGAACAAAGTCCTTGGATGAAAATATGATTTCAACCCTCATTACGCATATTATT  
AACCCACTAGCCTTTATTGTACCCGTTTTGCTAGCCGTAGCATTCCCTACCCTCCTTG  
AACGAAAAGTGCTAGGCTATATACAACCTCCGAAAAGGGCCTAACATCGTAGGGCCT  
TACGGCCTCCTTCAACCCATTGCTGACGGGGTAAAACTGTTTATCAAAGAACCCGTC  
CGCCCTTCAACCGCCTCGCCTGTTCTGTTCCCTCGTAGCCCCCATGCTCGCACTCACCT  
TAGCCCTTACACTTTGAGCCCCCATACCTTTTCCCTACCCTGTTGTTGACCTCAACCT  
AGGTATCTTGTTTCATCCTGGCACTATCTAGCCTTGCGGTTTTATTCCATCCTCGGATCA  
GGATGAGCCTCCAATTCAAAATATGCCCTGGTGGGTGCACTACGGGCTGTTGCCAG  
ACGATTTCTTACGAGGTGAGCCTTGGACTCATTTTACTTAACATCATTATCTTTACAG  
GAGGCTTCACACTTCAGACCTTTAATACAGCCCAAGAGGCCATCTGACTGGTCGTGC  
CCGCCTGACCCCTAGCTGCCATGTGATACATTTCTACCCTTGCCGAAACAAACCGCG  
CGCCCTTCGATCTAACAGAAGGGGAATCTGAACTTGTCTCAGGCTTCAACGTAGAAT  
ATGCAGGGGGACCCTTCGCTTTGTTCTTCTTAGCTGAATACTCCAACATTCTCCTGAT  
AAATGCCCTATCCGCAACACTATTTCTGGGGCGCCTCCCACATTCCGTCCATCCCAGA  
ATTAACCAGCATTAATATTATAACGAAAGCAGCCCTTCTCTCAGTCGTCTTCCTCTG  
GGTTCGAGCCTCTTACCCACGATTCCGTTACGACCAACTCATAACCTCATTTGAAA  
AAATTTCTTCCACTTACACTAGCCCTGGTTATTTGACACTTAGCGCTCCCTATCGCA  
TTCGCTGGTCTTCCACCACAACCTATAAATGAACCCCTACATCTTGACCACCCTTCTAT  
TTGGTTTAGGCCTAGGTACAACACTCACATTTGCAAGCTCGCACTGACTTCTCGCTT  
GAATGGGCCTCGAAATCAATACACTGGCCATTATTCCACTAATAGCCCAACATCACC  
ACCCACGGGCAGTTGAAGCAACTACTAAATACTTCCTAGCACAAAGCCACAGCGGCC  
GCCACGCTCCTGTTTGCAAGCACAAACCAACGCTTGACTTACCGGCCAGTGGGATATC  
CAACAAATAACACACCCGCTCCCCACAACAATAATTGTCATTGCCCTAGCACTAAAA  
ATTGGACTAGCACCATGCACTCTTGACTCCCCGAGGTTCTTCAGGGCCTAGATCTT  
ACCACCGGGTTAATTCTATCCACATGACAGAAGCTTGCCCCCTTTGCTCTCTTACTAC  
AAATTCAAACAACAACCCTACCCCCCTAATCATTATCGGCTTACTTTCTGCCCTTGTC  
GGTGGGTGAGGCGGCCTCAACCAAACACAACCTGCGTAAAGTCCTTGCCCTACTCCTCA  
ATTGCTCACCTTGGGTGAATAATACTGATCCTTCAATTTTCACCATTGCTGAGCCTCC  
TCGCACTCCTCACATACTTCCCATGACCTTTTCAGCATTCCCTCATCTTCAAAGTGAAC  
AAAGCCACCCTGTAAATGCACTCGCGATCTCCTGAGCAAAAACCCCCGCCCTCACA  
GCCCTCGCCCCCTTGTATTACTTTCCCTCGGCGGCCTTCCGCCGCTTACCGGCTTCA  
TACCCAAATGATTCAATTCTCCAAGAGCTCACTAAACAAGATCTCCCAACCCTCGCCAC  
AGTTGCTGCATTAACAGCCCTATTAAGCCTTTACTTCTACCTTCGTCTCTCGTATGCA  
ATAACCCTAACGATATTCCCTAATAACCTCGTTGGTGTAGCCCCCTGACGATTCTATT  
CCCCCAATTTACCCTCCCCCTAGCCGTCTCTACCACAGCAACCACCCTTCTTCTGCC  
GCTTGCCCCCTGCTGCTGTGGCACTCCTCATCACCTATGAGCCTTCTTCTAACCATCAT  
TTCAATTACCGCCCTCCTCTCAACGGTACTTGCCATTGTGTCTTTTTGACTCCCCAA  
ATCACACCAGACCACGAGAACTATCACCATACGAATGTGGCTTCGACCCCATAGG  
TTCCGCCCCGATTACCTTTCTCGCTGCGATTTTTTCTCATTGCAATCCTTTTTCTTCTCT  
TCGACTTAGAAATTGCACTTCTTCTCCCCCTCCCATGAGGGGACCAACTAGCATCCC  
CTCTGCTTACATTCACCTGAGCTACAGCTGTTCTATCCCTTCTAACCCTCGGCCTCAT  
TTACGAATGAATGCAGGGAGGCCTTGAATGGGCTGAATATGCTAAAAATTCTAATC  
CCAACACTCATGCTAATCCCAACAGCCTGACTACTCAAACCTAGCTGGCTGTGGCCC  
ATAACTTTGTTATATAGCTTTTGTATCTCCCTGATTAGCCTTTCGTGATTAAAAAATC

TCTCGGAAACCGGCTGATCCTCACTCAACCTATTTATAGCTACCGACGCCCTGTCAA  
CACCCCTCCTAGTTCTTACATGCTGGCTCCTCCCACTAATGATCTTGGCAAGCCAGA  
AACATACAGCCTCAGAACCCTGGGTCGGCAACGTATGTACATCACACTTCTCGCCT  
CCTTCAGTTTTTTCTGATTCTAGCATTTAGCGCCACTGAACTCGTAATATTCTACGTA  
ATATTTGAAGCAACCCTGATCCCCACACTTATTATTATTACCCGCTGAGGTAACCAA  
ACAGAACGCCTAAATGCAGGGACCTACTTCCTCTTCTATACACTAGCAGGTTCACTC  
CCTCTTCTTGTGCCCCTGCTCTTGCTCCAAAACACATCAGGGACCCTCTCACTATTGA  
CCCTCCATTACGGGGATCCTCTAACTATCAACTTATGCAGACAAATTATGGTGAGCA  
GGCTGCCTTCTAGCCTTCCTGGTTAAAATGCCACTTTACGGTGTTCACCTATGACTTC  
CTAAAGCACACGTCGAAGCCCCAATTGCAGGCTCAATAATCCTTGCAGCAGTTCTCC  
TTAAACTAGGGGGTTACGGCATAATCCGCATGATAACAATGCTTGAGCCTCTAACTA  
AGGAACTAAGCTACCCCTTCATTGTCTTTGCACTTTGGGGTGTAATTATAACTGGTTC  
AATTTGTCTACGCCAAACAGACCTTAAATCTCTAATTGCCTATTCATCTGTAAGTCAC  
ATGGGCCTGGTAGCCGGGGGAATTCTCATCCAATCTCCTTGAGGACTCACGGGGGC  
ACTTACACTTATAATTGCTCATGGTCTGACCTCCTCAGCCCTGTTCTGCCTAGCAAAC  
ACAACTATGAGCGGACTCACAGCCGTACAATAGTCCTGGCACGAGGGCTTCAAGT  
GGCACTACCCCTGATGGCCACTTGATGATTTATCTCCAGCCTAGCCAACTGGCCTT  
GCCACCACTACCCAACCTTATGGGAGAACTAATGATTATTACTTCTCTTTTTAACTGA  
TCCTGGTGAACCCTAGCATTAACGGGGTCCGGCACTCTTATTACAGCCGGTTACAGC  
CTCTACATATTCTTAATAACTCAACGAGGCCCCCTCCCAACGCACGTAATTGCACTC  
GAACCATCACACACCCGAGAACACCTTCTTATTGCCTTCATCTTATTCCTCTCATTCT  
CCTTGTGCTTAAGCCCGAGCTGATCTGAGGTTGGACTGCCTATGACCCCCACACACT  
TTGCCTTCTCCTCAGCCTTTTTTCTAGGTTTAAACAGGCCTGGCATTCCACCGGTTCCA  
CCTCCTCTCCGCCCTATTGTGCCTTGAAGGGATAATACTATCTCTATTTGTTGCCCTC  
TCCTTGTGAACACTCCAACCTAGACTCAACTAACTTTTCAGCATCTCCTATGCTCCTCC  
TTGCATTTTCAGCCTGCGAAGCAAGCGCCGGGCTCGCTCTTCTGGTTCGCCACTGCC  
GAACCCACGGAAGTGAACGACTACAAAGCCTAAATCTCCTCCAATGCTAAATGCAC  
CCCACCTCCCTAATGATCTCATCAAGCTTGGTTACAATCTTTGCATTACTAGCCTACC  
CTCTGATCACACGATTTCGTCCACACCCCGAGGGCCTCAATGAGCAACATCTCATG  
TCAAGACAGCTGTAAAAATAGCTTTCTTTGTCAGCCTCTTACCCCTCGCCCTATTCT  
AAACGAGGGTGCCGAGACAATCGTCACTAATTGAACCTGGATAAACACTAATACCT  
TTGACATCAACATTAGCCTAAAATTTGACTTTTATTTCGATTATTTTTACACCCATCGC  
CCTCTATGTTACTTGATCCATTCTGGAATTTGCATCATGGTACATGCACGCCGATCCA  
AACGTGAACCGCTTTTTTAAGTATCTTCTGACATTTTTAATTGCCATAATCATTCTAG  
TAACCGCAAACAACATGTTTCAACTCTTTATTGGTTGAGAAGGCGTCGGGATCATGT  
CATTCTCCTCATCGGCTGGTGATACGGACGGGGCCGACGCTAACACTGCGGCACTTC  
AAGCGGTTCTGTATAACCGGGTCGGGGACATCGGACTTATCTTCGCCATAGCTTGAA  
TAGCAACAAACCTGAACTCCTGAGAAATACAACAAATTTTTGCAACTTCCAAAGAC  
ATAGACTTAACCTACCCCTCCTCGGACTAATCGTTGCAGCAACTGGGAAATCAGCT  
CAGTTTGGACTTCACCCTTGACTCCCTCCGCTATGGAGGGTCTACACCGGTATCT  
GCCCTACTTCATTCTAGCACTATGGTCGTCGCCGGCATTTCCTGCTAGTCCGGATGA  
GTCCGCTCCTGGAAAATAACCCGACTGCCCTCACAACCTGTCTTTGCCTCGGGGCTC  
TCACGACACTATTTACTGCAACTTGTGCCCTTACCCAGAATGACATTAAAAAAATCG  
TCGCATTCTCTACATCCAGCCAGCTTGGACTCATGATGGTAACCATCGGACTAAACC  
AACCTCAACTAGCATTTCTTCACATCTGTACACATGCCTTCTTTAAAGCCATGCTATT  
TCTCTGCTCGGGGTCTATTATTCATAGCCTAAACGACGAACAAGACATCCGAAAAAT  
AGGAGGGATACACCACCTTGCACCTTTCACCTCATCTTGTCTAACAATTGGCAGCCT  
CGCACTTACGGGAACCCCTTCTTAGCCGGTTTCTTCTCCAAAGATGCCATCATCGA

AGCATTAACACATCCCACCTAAACGCCTGAGCCCTTACCCTTACCCTCCTGGCCAC  
ATCTTTTACAGCAATCTACAGCTTCCGAGTAATTTTCTTTGTGCCCATGGGCCATCCC  
CGATTTAGCCCATCTCCCCTATTAACGAAAACAACCCAGCAGTAATTAATCCGCTCA  
AACGACTAGCATGGGGCAGTATCATCGCAGGACTACTAATCACCTCAAATATCACA  
CCCCTAAAAACACCTGTTATGTCCATGCCGCCCTTCTGAAACTAGCCGCCCTGGCA  
GTTACGATCGTAGGCCTACTGGTTGCCATAGAACTTGCCATACTAACCAACAAACAA  
TTTAAATCAACCCCCCATCTTAACGTACACAACCTTCTCCAACATACTAGGCTTCTTCCC  
TGCCATTGTGCACCGCCTGACCCCTAAGTTAGGGCTCGTTCTCGGCCAAGACATTGC  
CAACCAAATAGTAGACCAAACCTGACTAGAAAAAGCAGGCCCCCAAAGCCATTGTAT  
CCTCCAACCTCCCCCTAGTCTCTTCTACAAGTAATATTTCAGCGAGGAATAATCAAGA  
CATACTACTCTCTTCCCTTTTAACACTAGCCCTTATAATCCCAACACTCATCCCCTAA  
TGACTTTTGTATATATTTAGTTTTATTTTCTCTTGTGTTGGGGTTGGTTGCAGTTGCT  
TCTAACCCGTCCCCCTACTTTGCTGCTTTAGGGTTGGTTGTGGTAGCTGGGATGGGGT  
GTGGTATTTTAGTCGGGCACGGGGGGGCCCTTTTTGTGCTTAGTTCTCTTTCTAATTTA  
CTTAGGCGGGATACTAGTTGTATTTGCATACTCAGCAGCGTTAGCTGCTGAGCCGTA  
CCCGGAAAGCTGGGGTAGCTGGTCGGTAATAGTTTACGGTTGTTTATGTGGCAGGGG  
TAGTGATAGTCTCTGCGTTGTTCTGAGGGGGGTGATATGAATCGTCTTGGGTCTTGGT  
AGATGAGTTGGCGGAGTTTTCTGTGTTCCGAGGCGATATTGGAGGGGTAGCTTTAAT  
GTACTCTTCTGGGGGGTGATTGTTAATTATTAGTGCGTGGGTGTTACTTCTTACGTTG  
TTTGTGGTCCTTGAGTTAACCGCGGTTTAAGCCGAGGGGCGTTGCGACGGTTT"/>

<sequence id="seq\_Pseudopleuronectes\_yokohamae\_KT224485"

spec="Sequence" taxon="Pseudopleuronectes\_yokohamae\_KT224485" totalcount="4"

value="ATGATACTAAGCTTCTTTGACCAATTTATGTCCCCCGTATTCCTGGGCATCCC  
ACTAATTGCACTAGCAATTACACTGCCTTGAACACTTTTCCCAGCCCCCGTATCCGTT  
GATTAAACAACCGCCTAATCTCCCTTCAAGGCTGGTTTATTAGCGGCTTTACCTCAC  
AACTCCTTCTTCCGCTAAACCCGGGAGGCCACAAATGAGCGCTTCTATTGCGCTCGC  
TAATCTTTTCTTTTTCTATTAACATGCTCGGACTCCTTCCGTACACATTTACACCTACC  
ACCAACTCTCACTCAACCTCGGGCTTGCAGTCCCACTCTGATTGGCAACTGTCATC  
ATGGTATGCGGAACCAACCAACAATTGCTTTAGGCCACCTTCTTCCAGAAGGAATC  
CTACCCTCCTGATCCCAGTACTAATTATCATCGAAACAATTAGCCTATTTATTCGACC  
CCTTGCTCTTGGTGTCCGACTTACAGCAAACCTCACAGCAGGCCATCTCCTCATTTCA  
GCTCATTGCAACAGCTGCCTTCGTCCTTCTCCCGCTTATACCTGTTGTTGCTATTTTA  
ACAACAACGGTTCTTTTCTCCTCACTCTTCTGGAAGTTGCCGTTGCTATAATTCAAG  
CCTATGTCTTTGTTCTACTTCTAAGTCTTTACCTACAAGAAAACGTTTAATGCCTCAA  
CTAAACCCCGCACCTTGATTTGCAATTTTGGTTTTCTCTTGAATAATCCTTTTAACTG  
TCATTCCCCCAAAGTTTTAGCTCACACTTACCCTAATGAGCCAACCTCCCAAAGCA  
CACAAAAACAAAACAGAACCTGAAACTGACCATGATACTAAGTGGCAATCACACG  
TTGATTTTTCTCGACCAATCACAAAGACATCGGCACCCTCTATCTTGTATTTGGTGCC  
TGAGCCGGAATAGTGGGAACAGGCCTAAGTCTGCTCATTGAGCAGAGCTAAGCCA  
ACCCGGGGCTCTCCTGGGAGACGACCAAATTTATAACGTAATCGTCACCGCACACG  
CCTTTGTAATAATCTTCTTTATAGTAATACCAATTATGATCGGAGGGTTCCGAAACT  
GACTTATTCCATTAATAATTGGGGCCCCCGATATGGCCTTCCCTCGAATAAATAACA  
TGAGCTTCTGACTTCTACCCCGTCCTTTCTCCTCCTTCTAGCCTCTTCAGGCGTTGA  
AGCTGGGGCAGGAACAGGATGAACCGTGTATCCCCCACTAGCTGGAAATCTAGCAC  
ACGCCGGAGCATCAGTAGACCTCACCATTTTCTCACTTCACCTTGCCGGAATTTTCAT  
CAATTCTAGGGGCAATCAACTTTATTACTACCATCATCAACATGAAACCAACAGCAG  
TCACTATGTACCAAATCCCCTATTTGTCTGGGCCGTAATAATCACCGCCGTTCTTCT  
TCTTCTTCCCTACCCGTCTGGCCGCTGGCATTACAATGCTGCTGACAGACCGCAA

CCTAAACACAACCTTCTTTGACCCTGCCGGAGGGGGTGACCCCATCCTCTACCAACA  
CCTATTCTGGTTCTTTGGTCATCCAGAAGTTTACATTTTAATTCTTCCAGGCTTCGGG  
ATGATTTCTCACATTGTTGCATATTATGCAGGTAAGAAAGAACCCTTTGGTTACATA  
GGAATAGTCTGGGCTATGATGGCTATCGGACTCCTGGGATTCATTGTATGAGCCAC  
CACATGTTTACAGTCGGAATAGATGTGGACACACGAGCCTATTTTACCTCTGCCACA  
ATAATTATTGCCATTCCAACCGGCGTAAAAGTTTTTAGCTGACTCGCAACCCTTCAT  
GGAGGAAGCATTAAATGAGAAACCCCACTCCTGTGGGCCCTAGGCTTTATTTTCCTA  
TTTACAGTGGGAGGTCTTACTGGTATTGTCTTAGCTAACTCGTCTCTTGACATTGTGC  
TTCATGACACATACTATGTAGTAGCCCACTTCCACTATGTCTTATCTATGGGGGCTGT  
ATTTGCAATCGTTGCCGCTTTCGTACACTGATTCCCCCTATTTACAGGCTATACTCTC  
CACTCCACATGAACAAAAATTCACTTTGGCCTAATGTTTGTAGGGGTAAACCTCACA  
TTCTTCCCCAACATTTCTGGGTCTCGCCGGAATGCCTCGGCGATATTCAGACTACC  
CGGACGCATACACCCTTTGAAATACTGTCTCATCGATCGGCTCACTAATGTCGCTCG  
TCGCTGTGATTTTATTTTGTATTATTGAGAAGCATTACGGCCAAACGAGAAGT  
CGGGGCAGTAGAACTAACTTCAACTAATATTGAATGACTTACGGCTGCCCTCCACC  
TTACCACACATTTGAGGAGCCCGCATTTCGTTCAAGTTCGTATAAAATAAATGGCACA  
TCCATCACAACCTGGGATTTCAAGACGCAGCTTCCCCCTTATAGAAGAACTACTTCA  
CTTCCATGACCACGCCTTAATAATTGTCATTCTCATCAGCACAATGGTACTTTATATC  
ATTGTGGCAATGGTCACGGCCCACTAACCGATAAGCTTGTGTTAGACTCTCAAGAA  
ATTGAAGTTATCTGAACAGTTCTCCAGCTATTATTCTTATTCTCATCGCCCTCCCGT  
CTCTCCGAATTTTATACCTAATAGACGAAATTAATGATCCTCACCTGACAATTAAG  
CCTTAGGTCACCAATGATACTGAAGCTACGAATACACAGACTACCAAGACCTCGGTT  
TTGACTCCTACATGGTCCCACTCAAGACCTAACCCCGGACAATTCCGACTACTAG  
AAGCAGACCACCGAATGGTAATTCCTGTAGAATCTCCAATTCGGGTCTTATCTCAG  
CTGAAGATGTCTTGCAATTCATGAGCAGTCCCCTCCCTGGGCGTAAAAGTAGACGCCG  
TACCTGGACGATTAAACCAAGCAACCTTTATTGTTAGCCGACCCGGCGTATTCTATG  
GTCAATGCTCTGAAATTTGCGGGGCAAACCACAGCTTTATGCCCGTCGTTGTAGAGG  
CAGTCCCACTTGACCACTTTGAGAACTGGTCTTCGCTAATAATTGAAGACGCCTATG  
GCCCCTCAAGCACACCCATACCACATAGTCGACCCGAGCCCATGACCCCTCACGGG  
GGCTATTGCTGCCCTATTGATAACATCTGGCCTTGCTATCTGATTCCACTTTCACTCC  
ACAACCCTAATAACTATTGGAACAATCCTTCTCACTCTAACAGTCTTTCATGATGA  
CGAGACGTCGTTGAGAAGGGACATTTCAAGGACACCACACCCCTCCCGTTCAAAA  
AGGCCTCCGGTACGGAATAATTCTATTTATTACATCAGAAGTCCTATTCTTCCTAGG  
CTTCTTCTGAGCCTTTTACCACTCAAGCCTAGCACCCACTCCCGACCTAGGGGGCTTT  
TGACCACCAGCAGGCATCACACCTTTAGACCCCTTCGAAGTCCCGCTTCTAAACACA  
GCAGTACTGCTTGCCCTCAGGCGTAACTGTTACATGGGCACATCACAGCATCATAGAA  
GGTAAACGAAAACAAGCTATTCAATCTCTCGCCCTAACAATCTTACTCGGGGGATAC  
TTCACCTTCCTCCAAGGCCTTGAGTACCACGAAGCCCCCTTCACCATCGCAGACGGG  
GTTTACGGTGCTACATTCTTTGTTGCCACCGGCTTCCACGGACTTCACGTCTTAATTG  
GGTCATCTTTCCTAGCCGTTTGTCTACTACGCCAAATTCTCCACCCTTTACATCAGA  
CCACCCTTTGGGTTTGAAGCAGCCGCATGATACTGACACTTCGTAGACGTCGTCTG  
ACTCTTCTCTATATCTCTATTTACTGATGAGGATCTTAATGGCCAATCTCCGTAAAT  
CTCACCCCTTCTTAAAATCGCAAACGATGCTTTAGTCGACCTCCCAGCCCCCTCGA  
ACATTTCTGTCTGATGAACTTTGGGTCTCTTTTAGGACTCTGCCTAGTGACCCAAAT  
CGTACCGGCTTATTTTTAGCCATACACTACACATCGGATATTGCTACTGCCTTCACC  
TCCGTTGCACACATCTGCCGGGACGTCAACTACGGCTGACTTATCCGAAGCATCCAT  
GCCAATGGCGCATCATTCTTTTTATCTGTATCTACCTTCACATCGGCCGGGGTCTCT  
ACTACGGCTCCTACCTATACAAAGAAACATGAACCATCGGGGTCGTCCTGCTGCTCC

TTGTAATGATAACCGCTTTCGTCGGATACGTCCTCCCTTGAGGACAAATGTCATTTTG  
AGGTGCAACCGTCATTACCAACCTACTATCTGCAGTACCTTATGTTGGAGGTACTCT  
TGTCCAGTGAATTTGAGGTGGCTTTTCTGTAGATAATGCCACCCTCACTCGGTTCTTT  
GCGTTCCACTTCCTCTTCCCTTTTATTATCGCAGCCGCAACAGTTATTCATCTTCTTTT  
TCTCCACGAAACTGGTTCAAACAATCCTACCGGCCTGAACTCGGATTCCGACAAAGT  
CCCCTTCCACCCCTACTTTACGTACAAAGATCTCTTGGCTTCGCAGTTCTTCTGACTG  
CACTGGCCTCCCTCGCCCTATTTTCCCCAAATCTTTTAGGAGACCCGGACAATTTTAC  
CCCCGCAAACCCGCTTGTTACACCTCCTCACATCAAGCCAGAATGATACTTCCTCTTT  
GCTTACGCCATTCTCCGCTCCATTCCAAACAAGCTTGGGGGCGTACTTGCCCTTCTAT  
TCTCGATTCTGGTTCTTATGCTCGTTCCCTTTTCTCCACACATCTAAACAACGAAGCTT  
AATGTTTCGTCCTGTAACACAATTCCTGTTCTGATCTTTAGTAGCTGACGTAATAATT  
CTGACTTGAATTGGAGGAATACCCGTAGAACACCCTTTCGTTATCATTGGACAAGTA  
GCATCCCTCATCTACTTCTCCCTTTTCCTGGTCCTAATCCCAACAGCAGGCTGAATGG  
AAAACAAAGTCCTTGGATGAAAATATGATTTCAACCCTCATTACGCATATTATTAAT  
CCACTAGCCTTTTATTGTACCCGTTTTGCTAGCCGTAGCATTCTTACCCTCCTTGAAC  
GAAAAGTGCTAGGCTATATACAACCTCCGAAAAGGGCCTAACATCGTAGGGCCTTAC  
GGCCTTCTTCAACCCATTGCTGACGGGGTGAACTATTTATCAAGGAACCCGTTTCGC  
CCTTCAACCGCCTCGCCTGTTCTGTTCCCTCCTAGCCCCCATACTCGCACTCACCTTGG  
CCCTGACCCTTTGAGCCCCCATGCCTTTTCCCTACCCCGTTATTGACCTTAACCTGGG  
TATCTTATTCATCCTGGCACTGTCTAGTCTTGCAGTTTATTCCATCCTTGGGTCAGGA  
TGAGCATCCAATTCAAAATATGCCCTAGTGGGTGCACTACGAGCTGTTGCCCAAACG  
ATCTCTTACGAAGTGAGCCTTGGGCTCATTTTACTCAACATCATTATCTTTACAGGAG  
GCTTCACGCTTCAGACCTTTAACACAGCCCAAGAAGCCATCTGACTGGTTGTGCCTG  
CCTGACCCCTAGCTGCCATGTGATACATTTCCACCCTTGCCGAAACAAACCGTGCAC  
CCTTCGACCTAACAGAGGGGGAGTCTGAACTTGTCTCAGGCTTTAACGTAGAATATG  
CAGGAGGCCCTTCGCTTTATTCTTTTTAGCTGAATACTCAAACATTCTCCTAATGAA  
TGCTCTATCCGCAACACTATTTCTGGGCGCCTCTCACATTCCGTCTATCCCAGAATTA  
ACCAGCATTAATATTATAACTAAAGCAGCTCTTCTCTCAGTTGTCTTTCTCTGGGTTT  
GAGCCTCATATCCACGGTTCCGTTACGACCAACTCATACACCTCATTTGAAAAAATT  
TCCTCCCCTAACAACCTAGCCCTGGTTATTTGACACTTAGCGCTCCCCATCGCATTCGC  
TGGTCTTCCACCACAACCTGTAAATGAACCCCTACATCTTGACCACCCTTCTATTTGGT  
TTGGGCCTAGGTACAACACTCACATTTGCAAGCTCGCACTGACTTCTCGCTTGAATG  
GGCCTCGAAATTAATACTAGCCATTATTCCACTAATGGCTCAACATCACCACCCA  
CGAGCAGTAGAAGCAACTACTAAGTATTTCTTAGCACAAGCCACGGCAGCCGCCAC  
ACTCCTGTTTGCAAGCACAACCAACGCTTGACTTACCGGCCAGTGGGACATCCAACA  
AATAACACACCCGTTACCCACAACAATAATTGTGATTGCCCTGGCACTAAAAATTGG  
ACTAGCACCAATGCACTCTTGACTCCCCGAAGTTCTTCAGGGCCTAGACCTTACCAC  
CGGATTAATTCTGTCCACGTGACAAAACTTGCCCCCTTTGCTCTCTTACTACAAATT  
CAAACAACAACCCACCCCGCTAATCATTATCGGTTTACTTTCTGCCCTTGTCGGTG  
GGTGAGGTGGTCTTAACCAAACACAGCTGCGTAAAATCCTGGCCTATTCTCGATTG  
CACACCTTGGCTGAATAATACTGATCCTTCAATTTTCACCACTCCTGAGTCTCCTCGC  
ACTCCTCACATATTTTCTATGACCTTTTACGATTCCTCATTTTCAAAGTCAACAAGG  
CCACCACTGTTAATGCACTCGCAATCTCCTGAGCAAAAACCCCTGCCCTCACAGCCC  
TCGCCCCCCTTGTTTTACTCTCCCTCGGTGGTCTTCCACCGCTTACCGGCTTCATACC  
CAAATGATTTATCCTCCAAGAGCTTACCAAACAGGATCTCCACCCCTCGCCACAATC  
GCTGCATTAACCTGCCCTGTTAAGCCTTTACTTCTACCTCCGCCTCTCGTATGCAATGA  
CCCTGACAATGTTCCCTAATAACCTCGTTGGTGTCACCCCTGACGGTTCTACTCCCC  
CCAATTCACCCTTCCCCTGGCCGTCTCAACCACAGCAACTACCCTTCTTCTGCCACTT

GCCCCTGCTGCTGTGGCACTCCTCATCACCTATGAGCCTTCTTCTAACCATCATTTCA  
ATTACCGCCCTCCTCTCAACGGTACTTGCCATTGTGTCTTTTTGACTTCCTCAAATTA  
CACCAGACCACGAGAACTGTCACCATAACGAGTGTGGCTTTGACCCCATGGGTTCG  
CCCGACTACCCTTTTCTACTGCGATTTTTTCTCATTGCAATCCTCTTTCTTCTATTGAC  
CTAGAAATTGCACTTCTCCTCCCCCTCCCATGAGGGGACCAACTAGCATCCCCCTCTG  
CTTACATTTATCTGAGCTACAGCTGTCCTCTCCCTTCTAACCCTCGGCCTCATTTACG  
AATGAATGCAGGGAGGCCTAGAATGGGCTGAATATGCTAAAAATTCTAATCCCAAC  
ACTCATGCTAATTCCAACGGCCTGACTACTCAAACCTAGCTGGCTATGACCCATAAC  
TTTGTTATATAGCTTTTGCATCTCCCTGGCTAGTCTTTCATGGTTAAAAAATCTTTCA  
GAAACCGGCTGATCCTCACTCAACCTATTCATGGCCACCGACTCCCTGTCAACACCC  
CTCCTGGTTCTTACATGCTGGCTCCTCCCACTAATGATCTTAGCAAGCCAGAAGCAT  
ACAGCCTCAGAACCCTCGGTCGGCAACGTATATACATTACACTTCTCGCCTCCTTC  
AGTTTTTTCTAATCCTAGCATTTAGCGCCACTGAACTCGTAATGTTCTACGTAATATT  
TGAAGCTACCCTGATCCCCACACTTATTATCATTACCCGCTGAGGTAATCAAACAGA  
ACGCCTAAATGCGGGAACCTATTTCTCTTCTATACACTGGCAGGCTCGCTCCCCCTT  
CTTGTTGCTTTGCTCTTGCTCCAGAACACATCCGGAACCCTGTCACTATTAACCCTCC  
ATTACGGAGACCCTCTGACTATCAACCTATGCCGACAAGTTATGGTGAGCAGGCTGC  
CTTCTAGCCTTCCTAGTTAAAATACCACTTTACGGTGTTCACCTATGACTCCCCAAAG  
CACACGTGAAGCCCCAATTGCAGGCTCAATAATCCTTGCAGCTGTTCTACTAAAC  
TAGGGGGTTACGGCATAATCCGCATAATAACAATGCTAGAGCCTCTAACTAAGGAA  
CTAAGCTACCCCTTCATTGTCTTTGCACTTTGAGGTGTAATTATAACTGGTTCAATTT  
GTCTACGCCAAACAGACCTTAAATCTCTAATTGCTTACTCATCTGTAAGCCACATGG  
GCCTGGTAGCCGGGGGAATTCTCATTCAATCGCCCTGAGGACTTACGGGAGCACTTA  
CACTTATAATTGCCCATGGTCTGACTTCCTCAGCCCTATTCTGCCTAGCAAACACAA  
ACTATGAGCGAACTCACAGCCGTACAATAGTCCTGGCACGGGGACTTCAAGTGGCA  
CTACCTCTTATAGCCACTTGATGGTTCATTTCCAGCCTGGCCAACCTGGCCTTGCCAC  
CACTACCCAACCTTATAGGAGAACTAATAATTATTACTTCTCTTTTTAACTGATCTTG  
ATGAACCCTGGCATTAAACAGGGTCCGGCACTCTCATTACGGCCGGTTACAGCCTCTA  
CATATTCCTAATAACACAACGAGGGCCCTCTCCCAACACACGTAATTGCACTTGAACC  
ATCACACACCCGAGAACATCTTCTTATTGCCTTCATCTCATCCCTCTCATTCTCCTTA  
TGCTCAAGCCCGAGCTGATCTGAGGTTGGACTGCCTATGACCCCCACACACTTTGCC  
TTCTCCTCAGCCTTTTTTCTAGGTTTAAACAGGCCTGGCATTCCACCGGTTCCACCTCC  
TCTCCGCCCTATTGTGCCTTGAAGGGATAATACTATCCCTATTTGTTGCCCTCTCCTT  
GTGAACACTCCAATAAGACTCAACTAACTTTTCAGCATCCCCCATGCTCCTCCTTGC  
ATTTTCAGCCTGTGAAGCAAGCGCCGGGCTCGCCCTTCTGGTCGCCACTGCCCCGAAC  
CCACGGGACTGACCGACTACAAAGCCTAAATCTCCTCCAATGCTAAATGCACCCAC  
CTCCCTAATGATCTCATCAAGCTTGGTTACAATCTTTGCATTACTAGCCTACCCTCTG  
GCCACTACAATTCGTCCCACACCCCGAGGGCCTCAATGAGCAACATCTCACGTCAAA  
ACAGCTGTAAAAATAGCCTTCTTTATCAGCCTCTTGCCCCTCGCTTTATTCCTTAACG  
AAGGCGCCGAAACAATCGTCACTAATTGAACCTGAATAAACACTAATACCTTCGAC  
ATCAACATTAGCCTAAAATTTGACTTTTATTCGATTATTTTTACACCAATTGCCCTCT  
ACGTTACCTGGTCCATTCTAGAATTTGCATCATGATACATGCACGCCGATCCAAACG  
TGAACCGCTTTTTTAAGTATCTTCTGACATTTTTAATTGCCATAATTATTCTAGTAAC  
CGCAAACAACATGTTCCAACCTTTTATCGGCTGAGAGGGTGTGCGGAATCATATCATT  
TCTCCTCATCGGATGATGATACGGACGAGCCGACGCTAACACTGCAGCACTTCAGGC  
AGTTCTATATAACCGGGTCGGGGACATTGGACTTATCTTCGCTATGGCTTGAATGGC  
AACAAACCTGAACTCCTGAGAAATACAACAAATCTTTGCAACCTCCAAAGACATAG  
ACTTAACTTACCCCTCCTCGGACTAATCGTTGCAGCAACTGGGAAATCAGCTCAGT

TTGGACTCCACCCTTGGCTACCCTCCGCTATGGAGGGTCCTACACCGGTATCTGCCC  
TACTTCATTCTAGCACTATAGTCGTTGCCGGCATTTCCTGCTAGTCCGAATGAGCCC  
ACTTCTGGAAAATAACCCGACTGCTCTCACAACCTGTCTCTGCCTCGGGGCTCTTAC  
GACACTATTCACTGCAACTTGTGCCCTTACGCAAAATGACATTAATAAAAAATCGTTGC  
ATTCTCTACATCCAGCCAACCTTGGCCTCATGATGGTAACATATCGGACTCAACCAACC  
CCAAC TAGCATTTCTGCACATCTGCACACATGCCTTCTTTAAAGCCATACTCTTTCTT  
TGCTCGGGGTCTATTATTCACAGCCTAAACGACGAACAAGACATCCGAAAAATAGG  
AGGAATACACCACCTTGCACCTTTCACATCATCTTGTCTAACAATTGGCAGCCTCGC  
ACTTACAGGGACCCCCCTTCTTGGCCGGTTTCTTTTCTAAAGACGCCATCATCGAAGC  
ATTAAACACATCCCACCTAAACGCCTGAGCCCTAACCCCTTACCCTCCTGGCCACATC  
TTTTACAGCAATCTACAGCTTCCGAGTAATTTTCTTTGTTCCCATGGGCCACCCCCGA  
TTTAGCCCTTCTCCCCCATTAACGAAAACAACCCAGCAGTAATTAACCCGCTCAAAC  
GACTAGCATGGGGCAGTATCATTGCAGGACTACTAATTACCTCAAATATTACACCCC  
TAAAAACGCCTGTCATATCCATGCCTCCCCTCCTAAACTAGCCGCCCTTGCAGTTA  
CAATCGTAGGCCTACTTGTAGCCATGGAAC TCGCCATGCTAACCAACAAGCAATTTA  
AATCAACCCCCATCTTAACGTACACAACCTTCTCCAACATACTAGGCTTTTTCCCTGCC  
ATTGTACATCGCCTAACCCCTAAATTAGGGCTCGTTCTCGGCCAAGACATCGCTAAT  
CAAATAGTGGACCAGACTTGGCTAGAAAAAGCAGGCCCCCAAAGCCATTGTATCCTC  
CAACCTCCCCCTGGTCTCCTCTACAAGTAATATTCAACGAGGAATAATCAAAACATA  
CCTACTCTCTTCCTTTTAACACTAGCCCTTATAATCCCAACACTTATTCCCTAATGAC  
TTTTGTTATGTATTTAGTTTTATTTCTCTTGTGTTGGGGTTGGTTGCAGTTGCTTCTA  
ACCCGTCCCCCTACTTTGCTGCTTTAGGATTGGTTGTGGTAGCTGGCATGGGGTGTG  
GTGTACTAGTCGGGCATGGGGGGCCCTTTTTGTCTTAGTTCTATTTCTAATCTACTT  
AGGTGGGATATTAGTTGTATTTGCATACTCAGCAGCGTTAGCTGCTGAGCCGTACCC  
GGAAAGCTGGGGTAGCTGGTCGGTAATAGTTTACGGTTGTCTATGTGGCGGGGGTA  
GTGTGGTTTCTGCGTTGTTCTGAGGGGGGTGATATGAATCGTCTTGGGTCTGGTAG  
ATGAGTTGGCGGAGTTTTCTGTGTTTCGAGGGGACATCGGAGGGGTAGCTTTAATAT  
ACTCTTCTGGGGGTTGGTTATTAATTATTAGTGCGTGGGTGTTACTTCTTACGCTGTT  
TGTGGTACTTGAGTTAACCGTGGCTTGAGCCGAGGGGCGTTGCGACAGTCT"/>

<sequence id="seq\_Pseudopleuronectes\_yokohamae\_KT878309"

spec="Sequence" taxon="Pseudopleuronectes\_yokohamae\_KT878309" totalcount="4"

value="ATGATACTAAGCTTCTTTGACCAATTTATGTCCCCCGTATTCCCTGGGCATCCC  
ACTAATTGCACTAGCAATTACACTGCCTTGAACACTTTTCCCAGCCCCCGTATCCGTT  
GATTAAACAACCGCCTAATCTCCCTTCAAGGCTGGTTTATTAGCGGCTTTACCTCAC  
AACTCCTTCTTCCGCTAAACCCGGGAGGCCACAAATGAGCGCTTCTATTGCGCTCGC  
TAATCTTTTCTTTTCTATTAACATGCTCGGACTCCTTCCGTACACATTTACACCTACC  
ACCAACTCTCACTCAACCTCGGGCTTGCAGTCCCACTCTGATTGGCAACTGTCATC  
ATGGTATGCGGAACCAACCAACAATTGCTTTAGGCCACCTTCTTCCAGAAGGAAGTC  
CTACCCTCCTGATCCCAGTACTAATTATCATCGAAACAATTAGCCTATTTATTCGACC  
CCTTGCTCTTGGTGTCCGACTTACAGCAAACCTCACAGCAGGCCATCTCCTCATTCA  
GCTCATTGCAACAGCTGCCTTCGTCCTTCTCCCGCTTATACCTGTTGTTGCTATTTTA  
ACAACAACGGTTCTTTTCCTCCTCACTCTTCTGGAAGTTGCCGTTGCTATAATTCAAG  
CCTATGTCTTTGTTCTACTTCTAAGTCTTTACCTACAAGAAAACGTTTAATGCCTCAA  
CTAAACCCCGCACCCCTGATTTGCAATTTTGGTTTTCTTGAATAATCCTTTTAACTG  
TCATTCCCCCAAAGTTTTAGCTCACACTTACCCTAATGAGCCAACCTCCCAAAGCA  
CACAAAAACAAAACAGAACCCTGAAACTGACCATGATACTAAGTGGCAATCACACG  
TTGATTTTTCTCGACCAATCACAAAGACATCGGCACCCTCTATCTTGTATTTGGTGCC  
TGAGCCGGAATAGTGGGAACAGGCCTAAGTCTGCTCATTGAGCAGAGCTAAGCCA



ACCCGGGGCTCTCCTGGGAGACGACCAAATTTATAACGTAATCGTCACCGCACACG  
CCTTTGTAATAATCTTCTTTATAGTAATACCAATTATGATCGGAGGGTTTCGGAAACT  
GACTTATTCCATTAATAATTGGGGCCCCCGATATGGCCTTCCCTCGAATAAATAACA  
TGAGCTTCTGACTTCTACCCCCATCCTTTCTCCTCCTTCTAGCCTCTTCAGGCGTTGA  
AGCTGGGGCAGGAACAGGATGAACCGTGTATCCCCCACTAGCTGGAAATCTAGCAC  
ACGCCGGAGCATCAGTAGACCTCACCATTTTCTCACTTCACCTTGCCGGAATTTTCAT  
CAATTCTAGGGGCAATCAACTTTATTACTACCATCATCAACATGAAACCAACAGCAG  
TCACTATGTACCAAATCCCACTATTTGTCTGGGCCGTACTAATCACCGCCGTTCTTCT  
TCTTCTTTCCCTACCCGTCTGGCCGCTGGCATTACAATGCTGCTGACAGACCGCAA  
CCTAAACACAACCTTCTTTGACCCTGCCGGAGGGGGTGACCCCATCCTCTACCAACA  
CCTATTCTGGTTCTTTGGTCATCCAGAAGTTTACATTTTAATTCTTCCAGGCTTCGGG  
ATGATTTCTCACATTGTTGCATATTATGCAGGTAAGAAAGAACCCTTTGGTTACATA  
GGAATAGTCTGGGCTATGATGGCTATCGGACTCCTGGGCTTCATTGTATGAGCCAC  
CACATGTTTACAGTCGGAATAGATGTGGACACACGAGCCTATTTTACCTCTGCCACA  
ATAATTATTGCCATTCCAACCGGCGTAAAAGTTTTTAGCTGACTCGCAACCCTTCAT  
GGAGGAAGCATTAAATGAGAAACCCCACTCCTGTGGGCCCTAGGCTTTATTTTCCTA  
TTTACAGTGGGAGGTCTTACTGGTATTGTCTTAGCTAACTCGTCTCTTGACATTGTGC  
TTCATGACACATACTATGTAGTAGCCCACTTCCACTATGTCTTATCTATGGGGGCTGT  
ATTTGCAATCGTTGCCGCTTTCGTACACTGATTCCCCCTATTTACAGGCTATACTCTC  
CACTCCACATGAACAAAAATTCACCTTTGGCCTAATGTTTGTAGGGGGTTAACCTCACA  
TTCTTCCCCCAACATTTCTGCGGTCTCGCCGGAATGCCTCGGCGATATTCAGACTACC  
CGGACGCATACACCCTTTGAAATACTGTCTCATCGATCGGCTCACTAATGTCGCTCG  
TCGCTGTGATTTTATTTTGTATTATTGAGAAGCATTACGGCCAAACGAGAAGT  
CGGGGCAGTAGAACTAACTTCAACTAATATTGAATGACTTTACGGCTGCCCTCCACC  
TTACCACACATTTGAGGAGCCCGCATTTCGTTCAAGTTCGTATAAAATAAATGGCACA  
TCCATCACAACCTGGGATTTACAGGACGCAGCTTCCCCCTTATAGAAGAACTACTTCA  
CTTCCATGACCACGCCTTAATAATTGTCATTCTCATCAGCACAATGGTACTTTATATC  
ATTGTGGCAATGGTCACGGCCCACTAACCGATAAGCTTGTGTTAGACTCTCAAGAA  
ATTGAAGTTATCTGAACAGTTCTCCAGCTATTATTCTTATTCTCATCGCCCTCCCGT  
CTCTCCGAATTTTATACCTAATAGACGAAATTAATGATCCTCACCTGACAATTAAAG  
CCTTAGGTCACCAATGATACTGAAGCTACGAATACACAGACTACCAAGACCTCGGTT  
TTGACTCCTACATGGTCCCAACTCAAGACCTAACCCCGGACAATTCCGACTACTAG  
AAGCAGACCACCGAATGGTAATTCCTGTAGAATCTCCAATTCGGGTCTTATCTCAG  
CTGAAGATGTCTTGCAATTCATGAGCAGTCCCCTCCCTGGGCGTAAAAGTAGACGCCG  
TACCTGGACGATTAAACCAAGCAACCTTTATTGTTAGCCGACCCGGCGTATTCTATG  
GTCAATGCTCTGAAATTTGCGGGGCAAACCACAGCTTTATGCCCGTCGTTGTAGAGG  
CAGTCCCCTTGACCACTTTGAGAACTGGTCTTCGCTAATAATTGAAGACGCCTATG  
GCCCCTCAAGCACACCCATACCACATAGTCGACCCGAGCCCATGACCCCTCACGGG  
GGCTATTGCTGCCCTATTGATAACATCTGGCCTTGCTATCTGATTCCACTTTCACTCC  
ACAACCCTAATAACTATTGGAACAATCCTTCTCACTCTAACAGTCTTTCAATGATGA  
CGAGACGTCGTTTCGAGAAGGGACATTTCAAGGACACCACACCCCTCCCGTTCAAAA  
AGGCCTCCGATACGGAATAATTCTATTTATTACATCAGAAGTCCTATTCTTCCTAGG  
CTTCTTCTGAGCCTTTTACCACTCAAGCCTAGCACCCACTCCCGACCTAGGGGGCTTT  
TGACCACCAGCAGGCATCACACCTTTAGACCCCTTCGAAGTCCCGCTTCTAAACACA  
GCAGTACTGCTTGCCCTCAGGCGTAACTGTTACATGGGCACATCACAGCATCATAGAA  
GGTAAACGAAAACAAGCTATTCAATCTCTCGCCCTAACAACTTACTCGGGGGGATAC  
TTCACCTTCTCCAAGGCCTTGAGTACCACGAAGCCCCCTTCACCATCGCAGACGGG  
GTTTACGGTGCTACATTCTTTGTTGCCACCGGCTTCCACGGACTTCACGTCTTAATTG

GGTCGTCTTTCCTAGCCGTTTGTCTACTACGCCAAATTCTCCACCACTTTACATCAGA  
CCACCACTTTGGGTTTGAAGCAGCCGCATGATACTGACACTTCGTAGACGTCGTCTG  
ACTCTTCCTCTATATCTCTATTTACTGATGAGGATCTTAATGGCCAATCTCCGTAAAT  
CTCACCCCCTTCTTAAAATCGCAAACGATGCTTTAGTCGACCTCCCAGCCCCCTCGA  
ACATTTCTGTCTGATGAACTTTGGGTCTCTTTTAGGACTCTGCCTAGTGACCCAAAT  
CGCTACCGGCTTATTTTTAGCCATACACTACACATCGGATATTGCTACTGCCTTCACC  
TCCGTTGCACACATCTGCCGGGACGTCAACTACGGCTGACTTATCCGAAGCATCCAT  
GCCAATGGCGCATCATTCTTTTTTATCTGTATCTACCTTCACATCGGCCGGGGTCTCT  
ACTACGGCTCCTACCTGTACAAAGAAACATGAACCATCGGAGTCGTCTGCTGCTCC  
TTGTAATGATAACCGCTTTCGTCTGGATACGTCTCCTCCCTTGAGGACAAATGTCATTTTG  
AGGTGCAACCGTCATTACCAACCTACTATCTGCAGTACCTTATGTTGGGGGTACTCT  
TGTCCAGTGAATTTGAGGTGGCTTTTCTGTAGATAATGCCACCCTCACTCGGTTCTTT  
GCGTTCCACTTCCTCTTCCCTTTCATTATCGCAGCCGCAACAGTTATTCATCTTCTTTT  
TCTCCACGAAACTGGTTCAAACAATCCTACCGGCCTGAACTCGGATTCCGACAAAGT  
CCCCTTCCACCCCTACTTTACGTACAAAGATCTCTTGGCTTCGCAGTTCTTCTGACTG  
CACTGGCCTCCCTCGCCCTATTTTCCCCAAATCTTTTAGGAGACCCGGACAATTTTAC  
CCCCGCAAACCCGCTTGTTACACCTCCTCACATCAAGCCAGAATGATACTTCCTCTTT  
GCTTACGCCATTCTCCGCTCCATTCCAAACAAGCTTGGGGGCGTACTTGCCCTTCTAT  
TCTCGATTCTGGTTCTTATGCTCGTTCCCTTTTCTCCACACATCTAAACAACGAAGCTT  
AATATTTTCGTCCTGTAACACAATTCCTGTTCTGATCTTTAGTAGCTGACGTAATAATT  
CTGACTTGAATTGGAGGAATACCCGTAGAACACCCCTTTCGTTATCATTGGACAAGTA  
GCATCCCTCATCTACTTCTCCCTTTTCCTGGTCCTAATCCCAACAGCAGGCTGAATGG  
AAAACAAAGTCCTTGATGAAAATATGATTTCAACCCTCATTACGCATATTATTAAT  
CCACTAGCCTTTATTGTACCCGTTTTGCTAGCCGTAGCATTCTTACCCTCCTTGAAC  
GAAAAGTGCTAGGCTATATACAACTCCGAAAAGGGCCTAACATCGTAGGGCCTTAC  
GGCCTTCTTCAACCCATTGCTGACGGGGTGAACTATTTATCAAGGAACCCGTTTCGC  
CCTTCAACCGCCTCGCCTGTTCTGTTCCCTCCTAGCCCCCATACTCGCACTCACCTTGG  
CTCTGACCCTTTGAGCCCCCATGCCTTTTCCCTACCCCGTTATTGACCTTAACCTGGG  
TATCTTATTCATCCTGGCACTGTCTAGTCTTGCAGTTTATTCCATCCTTGGGTCAGGA  
TGAGCATCCAATTCAAAATATGCCCTAGTGGGTGCACTACGAGCTGTTGCCCAAACG  
ATCTCTTACGAAGTGAGCCTTGGGCTCATTTTACTCAACATCATTATCTTTACAGGAG  
GCTTCACGCTTCAGACCTTTAACACAGCCCAAGAAGCCATCTGACTGGTTGTGCCTG  
CCTGACCCCTAGCTGCCATGTGATACATTTCCACCCTTGCCGAAACAAACCGTGCAC  
CCTTCGACCTAACAGAGGGGGAGTCTGAACTTGTCTCAGGCTTTAACGTAGAATATG  
CAGGAGGCCCTTCGCTTTATTCTTTTTAGCTGAATACTCAAACATTCTCCTAATGAA  
TGCTCTATCCGCAACACTATTTCTGGGCGCCTCTCACATTCCGTCTATCCCAGAATTA  
ACCAGCATTAATATTATAACTAAAGCAGCTCTTCTCTCAGTTGTCTTTCTCTGGGTTC  
GAGCCTCATATCCACGGTTCCGTTACGACCAACTCATACACCTCATTTGAAAAAATT  
TCCTCCCACTAACACTAGCCCTGGTTATTTGACACTTAGCGCTCCCCATCGCATTCGC  
TGGTCTTCCACCACAACCTGTAAATGAACCCCTACATCTTGACCACCCTTCTATTTGGT  
TTGGGCCTAGGTACAACACTCACATTTGCAAGCTCGCACTGACTTCTCGCTTGAATG  
GGCCTCGAAATTAATACTAGCCATTATTCCACTAATGGCTCAACATCACCACCCA  
CGAGCAGTAGAAGCAACTACTAAGTATTTCCCTAGCACAAGCCACGGCAGCCGCCAC  
ACTCCTGTTTGCAAGCACAAACCAACGCTTGACTTACCGGCCAGTGGGACATCCAACA  
AATAACACACCCGTTACCCACAACAATAATTGTGATTGCCCTAGCACTAAAAATTGG  
ACTAGACCAATGCACTCTTGACTCCCCGAAGTTCTTCAGGGCCTAGACCTTACCAC  
CGGATTAATTCTGTCCACGTGGCAAAAACCTTGCCCCCTTGCTCTCTTACTACAAATT  
CAAACAACAACCCACCCCGCTAATCATTATCGGTTTACTTTCTGCCCTTGTCGGTG

GGTGAGGTGGTCTTAACCAAACACAGCTGCGTAAAATCCTGGCCTATTCCTCGATTG  
CACACCTTGGCTGAATAATACTGATCCTTCAATTTTCACCACTCCTGAGTCTCCTCGC  
ACTCCTCACATATTTTCTATGACCTTTTCAGCATTCTCATTCTCAAAGTCAACAAGG  
CCACCACTGTTAATGCACTCGCAATCTCCTGAGCAAAAACCCCTGCCCTCACAGCCC  
TCGCCCCCCTTGTTTTACTCTCCCTCGGTGGTCTTCCACCGCTTACCGGCTTCATACC  
CAAATGATTTATCCTCCAAGAGCTTACCAAACAGGATCTCCACCCTCGCCACAATC  
GCTGCATTAAGTGGCCTGTTAAGCCTTTACTTCTACCTCCGCCTCTCGTATGCAATGA  
CCCTGACAATGTTCCCTAATAACCTCGTTGGTGTACCCCCCTGACGGTTCTACTCCCC  
CCAATTCACCCTTCCCCTGGCCGTCTCAACCACAGCAACTACCCTTCTTCTGCCACTT  
GCCCCTGCTGCTGTGGCACTCCTCATCACCTATGAGCCTTCTTCTAACCATCATTTCA  
ATTACCGCCCTCCTCTCAACGGTACTTGCCATTGTGTCTTTTTGACTTCCTCAAATTA  
CACCAGACCACGAGAACTGTCACCATACGAGTGTGGCTTTGACCCCATGGGTTCG  
CCCGACTACCCTTTTCACTGCGATTTTTTCTCATTGCAATCCTCTTTCTTCTATTGAC  
CTAGAAATTGCACTTCTCCTCCCCCTCCCATGAGGGGACCAACTAGCATCCCCTCTG  
CTTACATTTATCTGAGCTACAGCTGTCTCTCCCTTCTAACCCTCGGCCTCATTTACG  
AATGAATGCAGGGAGGCCTAGAATGGGCTGAATATGCTAAAAATTCTAATCCCAAC  
ACTTATGCTAATTCACACGGCCTGACTACTCAAACCTAGCTGGCTATGACCCATAAC  
TTTGTTATATAGCTTTTGTATCTCCCTGGCTAGTCTTTCATGGTTAAAAAATCTTTCA  
GAAACCGGCTGATCCTCACTCAACCTATTCATGGCCACCGACTCCCTGTCAACACCC  
CTCCTGGTTCTTACATGCTGGCTCCTCCCCTAATGATCTTAGCAAGCCAGAAGCAT  
ACAGCCTCAGAACCACTCGGTGCGCAACGTATATACATTACACTTCTCGCCTCCTTC  
AGTTTTTTCTAATCCTAGCATTTAGCGCCACTGAACTCGTAATGTTCTACGTAATATT  
TGAAGCTACCCTGATCCCCACACTTATTATCATTACCCGCTGAGGTAATCAAACAGA  
ACGCCTAAATGCGGGAACCTATTTCTCTTCTATACACTGGCAGGCTCGCTCCCCCTT  
CTTGTTGCTTTGCTCTTGCTCCAGAACACATCCGGAACCCTGTCACTATTAACCCTCC  
ATTACGGAGACCCTCTGACTATCAACCTATGCCGACAAGTTATGATGAGCAGGCTGC  
CTTCTAGCCTTCCTAGTTAAAATACCACTTTACGGTGTTCACCTATGACTCCCCAAAG  
CACACGTCGAAGCCCCAATTGCAGGCTCAATAATCCTTGCAGCTGTTCTACTTAAAC  
TAGGGGGTTACGGCATAATCCGCATAATAACAATGCTAGAGCCTCTAACTAAGGAA  
CTAAGCTACCCCTTCATTGTCTTTGCACTTTGAGGTGTAATTATAACCGGTTCAATTT  
GTCTACGCCAAACAGACCTTAAATCTCTAATTGCTTACTCATCTGTAAGCCACATGG  
GCCTGGTAGCCGGGGGAATTCTCATTCAATCGCCCTGAGGACTTACGGGAGCACTTA  
CACTTATAATTGCCCATGGTCTGACTTCCTCAGCCCTATTCTGCCTAGCAAACACAA  
ACTATGAGCGAACTCACAGCCGTACAATAGTCCTGGCACGGGGACTTCAAGTGGCA  
CTACCTCTTATAGCCACCTGATGGTTCATTTCCAGCCTGGCCAACCTGGCCTTGCCAC  
CACTACCCAACCTTATAGGAGAACTAATAATTATTACTTCTCTTTTTAACTGATCTTG  
ATGAACCCTGGCATTAAACAGGGTCCGGCACTCTCATTACGGCCGGTTACAGCCTCTA  
CATATTCCTAATAACACAACGAGGGCCCTCTCCAACACACGTAATTGCACTTGAACC  
ATCACACACCCGAGAACACCTTCTTATTGCCTTCATCTCATCCCTCTCATTCTCCTTG  
TGCTCAAGCCCGAGCTGATCTGAGGTTGGACTGCCTATGACCCCCACACACTTTGCC  
TTCTCCTCAGCCTTTTTTCTAGGTTTAAACAGGCCTGGCATTCCACCGGTTCCACCTCC  
TCTCCGCCCTATTGTGCCTTGAAGGGATAATACTATCCCTATTTGTTGCCCTCTCCTT  
GTGAACACTCCAAGTACTCAACTAACTTTTCAGCATCCCCCATGCTCCTCCTTGC  
ATTTTCAGCCTGTGAAGCAAGCGCCGGGCTCGCCCTTCTGGTCGCCACTGCCCGAAC  
CCACGGAAGTACCGACTACAAAGCCTAAATCTCCTCCAATGCTAAATGCACCCAC  
CTCCCTAATGATCTCATCAAGCTTGGTTACAATCTTTGCATTACTAGCCTACCCTCTG  
GCCACTACAATTCGTCCCACACCCCGAGGGCCTCAATGAGCAACATCTCACGTCAA  
ACAGCTGTAAAAATAGCCTTCTTTATCAGCCTCTTGCCCCTCGCTTTATTCTTAACG

AAGGCGCCGAAACAATCGTCACTAATTGAACCTGAATAAACACTAATACCTTCGAC  
ATCAACATTAGCCTAAAATTTGACTTTTATTCGATTATTTTTACACCAATTGCCCTCT  
ACGTTACCTGGTCCATTCTAGAATTTGCATCATGATACATGCACGCCGATCCAAACG  
TGAACCGCTTTTTTAAGTATCTTCTGACATTTTTAATTGCCATAATTATTCTAGTAAC  
CGCAAACAACATGTTCCAACCTCTTATCGGCTGAGAGGGTGTGCGGAATCATATCATT  
TCTCCTCATCGGATGATGATACGGACGAGCCGACGCTAACACTGCAGCCCTTCAGGC  
AGTTCTATATAACCGGGTTCGGGGACATTGGACTTATCTTCGCTATGGCTTGAATGGC  
AACAAACCTGAACTCCTGAGAGATACAACAAATCTTTGCAACCTCCAAAGACATAG  
ACTTAACCTACCCCCCTCCTCGGACTAATCGTTGCAGCAACTGGGAAATCAGCTCAGT  
TTGGACTCCACCCTTGGCTACCCTCCGCTATGGAGGGTCTACACCGGTATCTGCC  
TACTTCATTCTAGCACTATGGTCGTTGCCGGCATTTCCTGCTAGTCCGAATGAGCCC  
ACTTCTGGAAAATAACCCGACTGCTCTCACAACCTGTCTCTGCCTCGGGGCTCTTAC  
GACACTATTCAGTGAACCTTGTGCCCTTACGCAAAATGACATTAATAAAAAATCGTTGC  
ATTCTCTACATCCAGCCAACCTTGGCCTCATGATGGTAACTATCGGACTCAACCAACC  
CCAACCTAGCATTTCTGCACATCTGCACACATGCCTTCTTTAAAGCCATACTCTTTCTT  
TGCTCGGGATCTATTATTCACAGCCTAAACGACGAACAAGACATCCGAAAAATAGG  
AGGAATACACCACCTTGCACCTTTCACATCATCTTGTCTAACAATTGGCAGCCTCGC  
ACTTACAGGGACCCCCCTTCTTGGCCGTTTCTTTTCTAAAGACGCCATCATCGAAGC  
ATTAAACACATCCCACCTAAACGCCTGAGCCCTAACCTTACCCTCCTGGCCACATC  
TTTTACAGCAATCTACAGCTTCCGAGTAATTTTCTTTGTTCCCATGGGCCACCCCCGA  
TTTAGCCCTTCTCCCCCATTAACGAAAACAACCCAGCAGTAATTAACCCGCTCAAAC  
GACTAGCATGGGGCAGTATCATTGCAGGACTACTAATTACCTCAAATATTACACCCC  
TAAAAACGCCTGTCATATCCATGCCTCCCCTCCTAAAACCTAGCCGCCCTTGCAGTTA  
CAATCGTAGGCCTACTTGTAGCCATGGAACCTCGCCATACTAACCAACAAGCAATTTA  
AATCAACCCCCATCTTAACGTACACAACCTTCTCCAACATACTAGGCTTTTTCCCTGCC  
ATTGTACACCGCCTAACCCCTAAATTAGGGCTCGTTCTCGGCCAAGACATCGCTAAT  
CAAATAGTGGACCAGACTTGGCTAGAAAAAGCAGGCCCCCAAAGCCATTGTATCCTC  
CAACCTCCCCCTGGTCTCCTCTACAAGTAATATTCAACGAGGAATAATCAAAACATA  
CCTACTCTCTTCTTTTAACACTAGCCCTTATAATCCCAACACTTATTCCCTAATGAC  
TTTTGTTATGTATTTAGTTTTATTTCTCTTGTGTTGGGGTTGGTTGCAGTTGCTTCTA  
ACCCGTCCCCCTACTTTGCTGCTTTAGGATTGGTTGTGGTAGCTGGCATGGGGTGTG  
GTGTACTAGTCGGGCATGGGGGGCCCTTTTTGTCTTAGTTCTATTTCTAATCTACTT  
AGGTGGGATATTAGTTGTATTTGCATACTCAGCAGCGTTAGCTGCTGAGCCGTACCC  
GGAAAGCTGGGGTAGCTGGTCGGTAATAGTTTACGGTTGTCTATGTGGCGGGGGTA  
GTGTGGTTTCTGCGTTGTTCTGAGGGGGGTGATATGAATCGTCTTGGGTCCTGGTAG  
ATGAGTTGGCGGAGTTTTCTGTGTTTCGAGGGGACATCGGAGGGGTAGCTTTAATAT  
ACTCTTCTGGGGGTTGGTTATTAATTATTAGTGCGTGGGTGTTACTTCTTACGCTGTT  
TGTGGTACTTGAGTTAACCGTGGCTTGAGCCGAGGGGCGTTGCGACAGTCT"/>

<sequence id="seq\_Reinhardtius\_hippoglossoides\_AM749130" spec="Sequence"  
taxon="Reinhardtius\_hippoglossoides\_AM749130" totalcount="4"  
value="ATGATACTAAGCTTTTTTGACCAATTTATATCCCCAGTATACCTCGGTATTCC  
GCTAATTGCACTAGCAATTACCCTCCCCTGAATTCTGTTCCCAACCCCTCAAGCCGCT  
GATTAACAACCGTGTGCTAACACTTCAAGGATGATTTATTAGCCGCTTCACCTCAC  
AACTTCTTCTTCCCCTAAACCCCGGGGGCCACAAATGAGCAGTTTTATTTACCTCATT  
AATGTTTTTCTTTTCTATTAACATACTAGGACTCCTTCCATATACCTTCACACCAACA  
ACCAACTCTCCCTTAATATGGGCCTCGCAGTTCCCCTCTGATTAGCAACTGTCATTA  
TGGAATGCGAAATCAACCTACACATGCCCTAGGTCACCTCCTTCCAGAAGGCACCCC  
TACTGCTCTCATCCCTGTACTCATCATCATTGAAACAATTAGCCTATTTATTCGACCC

CTCGCTCTCGGTGTTGCGACTAACAGCGAATCTCACAGCAGGCCACCTCCTTATTCAA  
CTCATTGCAACAGCTGCCTTTGTCTTCTTCCGCTCATACCTGTTGTTGCTATCTTAA  
CAACGGTGGTCCTCTTCCTTCTTACTCTGCTAGAAGTCGCGGTGCGCATGATCCAAG  
CCTATGTCTTTGTTCTACTCTTAAGCCTATATCTACAAGAGAACGTTTAATGCCTCAA  
CTGAACCCCGCACCTGATTTGCAATTTTAGTTTTCTCTTGAATAATCTTTTTAACTG  
TTATTCCCCCAAAGTTTTAGCACATACTTACCCCAATGAACCTACCTCCCAAAGCA  
CACAAAAACAAAACAGAACCCTGAAACTGACCATGATACTAAGTGGCAATCACACG  
TTGATTTTTCTCGACCAATCACAAAGACATCGGCACCCTCTATCTCGTATTTGGTGCC  
TGAGCCGGTATAGTGGGAACAGGCCTAAGTCTGCTTATTCGGGCAGAACTAAGCCA  
ACCTGGGGCTCTCCTTGGAGACGACCAAATTTATAACGTAATCGTCACCGCACACGC  
CTTTGTAATAATCTTTTTTATAGTAATACCCATTATGATCGGGGGTTTCGGAACTGG  
CTTATTCCACTAATAATTGGAGCCCCAGATATGGCTTTCCTCGAATAAATAACATG  
AGTTTCTGACTTCTTCCCCCATCCTTCTTCTCCTCTTAGCCTCTTCAGGTGTTGAAGC  
TGGGGCAGGTACGGGGTGAACCGTTTATCCACCACTAGCTGGTAATCTGGCCACGC  
CGGAGCATCCGTTGACCTAACAATCTTCTCACTTCACCTTGCAGGGATTTCGTCAATT  
CTGGGGGCAATTAACCTTTATTACTACCATCATCAACATGAAACCCACAACAGTTACT  
ATGTACCAAATCCCATTATTTGTTTGGAGCCGTTCTAATTACCGCCGTACTTCTTCTTC  
TGTCCTTCCCGTCTTAGCCGCAGGGATTACAATGCTACTAACAGACCGCAACCTCA  
ACACAACCTTTTTTGACCCCGCCGGAGGTGGTGACCCCATCCTCTATCAACACCTAT  
TCTGATTCTTTGGCCACCCAGAGGTATATATTCTCATTCTTCCAGGCTTCGGAATAAT  
TTCCACATTGTTGCATACTATGCAGGTAAAAAGAACCTTTTGGTTACATAGGAAT  
AGTCTGAGCTATAATAGCCATTGGACTCCTGGGATTCAATTGTATGGGCCCATCACAT  
GTTTACAGTCGGGATAGACGTCGACACACGAGCCTACTTTACATCTGCCACAATAAT  
CATTGCAATCCCGACCGGCGTAAAAGTCTTTAGCTGACTCGCAACCCTCCACGGGGG  
AAGCATCAAATGAGAAACACCACTTCTTTGGGCCCTCGGCTTTATTTTCTCTTTACA  
GTAGGCGGTCTTACTGGCATTGTCTTGGCTAACTCCTCTCTTGACATTGTTCTGCATG  
ACACATACTATGTAGTAGCCCACTTCCACTATGTACTATCTATGGGTGCTGTATTTCG  
AATCGTTGCCGCCTTCGTCCACTGATTCCCACTATTTACAGGTTATACCCTCCACTCC  
ACATGAACAAAAATCCACTTCGGCCTGATATTTATTGGGGTCAATCTAACGTTCTTC  
CCCCAACACTTCCTGGGCCTAGCCGGAATGCCCCGACGATACTCAGACTACCCAGAC  
GCATATACCCTATGAAACACTGTCTCATCAATCGGATCCCTAATGTCGCTCGTCGCT  
GTAATCTTATTTTTGTTCATTATTTGAGAAGCATTTACAGCCAAACGAGAAGTTGGG  
GCAGTAGAACTTACTGCAACTAACATCGAATGACTTTACGGCTGCCCTCCACCCTAC  
CACACATTTGAAGAGCCCGCATTCGTCCAAGTTCGAATAAACTAAATGGCACATCCC  
TCACAACCTCGGATTTCAAGACGCAGCTTCACCCTTAATAGAAGAATACTTCACTTC  
CACGATCACGCCTTAATAATTGTAATTCTCATCAGCACGATAGTACTTTATATTATTG  
CGGCTATAGTTACAGCCAACTAACAGATAAACTTGTTCTAGATTCTCAAGAAATTG  
AAATTATCTGAACAGTTCTCCCAGCTGTTATTCTTATTCTCATCGCCCTACCATCTCT  
CCGAATTTTGTACTTAATAGACGAAATTAATGATCCCCACTTAACAATCAAAGCCAT  
GGGCCACCAGTGGTACTGAAGCTACGAATACACAGACTATGAAGACCTCGGTTTTG  
ACTCTTACATAATCCCCACACAAGACCTGACCCCTGGGCAGTTCCGACTACTTGAAG  
CAGATCACCGGATAGTAATCCCGGTAGAATCCCCTATTCGCGTTCTAATCTCAGCTG  
AAGATGTATTACATTCTGAGCAGTCCCCTCCCTGGGCGTAAAAGTTGACGCCGTAC  
CTGGACGATTAAATCAAGCAACCTTTATTGTTAGCCGGCCAGGCGTATTTTATGGTC  
AATGCTCTGAAATTTGCGGAGCAAACCATAGTTTTTATACCCATCGTTGTAGAAGCAG  
TCCCCCTTGAACACTTTGAAAACCTGGTCTTCACTAATAATTGAAGACGCCTATGGCC  
CATCAAGCACACCCATACCACATAGTCGACCCCAAGTCCATGACCCCTCACGGGGGCT  
ATTGCTGCCCTATTGATAACATCTGGCCTTGCTATCTGATTTCACTTCCATTCCACAA

CCCTTATAACTATTGGGACAGTCCTTCTCACCTTAACAATCTTCCAATGATGACGGG  
ACGTCGTACGAGAAGGCACATTTCAAGGACACCACACTCCCCCTGTTCAAATAGGC  
CTCCGATACGGAATAATCTTATTTATTACCTCAGAAGTTCTGTTCTTCTTAGGCTTCT  
TCTGAGCCTTTTACCACTCAAGCCTAGCACCTACTCCAGAACTAGGAGGCTTCTGAC  
CCCCAGCAGGCATTACCCCTTTAGACCCATTTGAAGTCCCGCTTCTTAACACAGCAG  
TCCTCCTTGCCCTCTGGTGTAAGTGTACCTGAGCACATCACAGCATTATAGAGGGTA  
AACGGAAACAACTATTCAATCTCTTGCCCTCACAATCTTACTCGGGGGTTACTTCA  
CTTTTCTCCAAGGCCTTGAGTATGTCGAAGCCCCCTTCACCATTGCAGACGGAGTTT  
ACGGTGCTACATTCTTTGTTGCCACCGGCTTCCACGGCCTCCACGTCTTAATCGGCAC  
CTCATTCTTAGCCGTTTGTCTGTTACGCCAAATCCTTCACCATTTTACATCAAACCAC  
CACTTTGGGTTTGAAGCAGCCGCATGATACTGACACTTCGTAGACGTCGTCTGACTT  
TTCCTCTATATCTCTATTTACTGATGAGGATCTTAATGGCCAGTCTACGTAAATCCCA  
CCCTCTTCTAAAAATCGCAAACGATGCTTTAGTTGACCTCCCAGCCCCCTCTAATATC  
TCCGTTTGGTGAAACTTTGGGTCTCTTCTAGGACTCTGTTTAGTAACCCAAATTGCTA  
CCGGCTTGTTTCTAGCCATACACTACACATCAGATATTGCTACTGCCTTCACCTCCGT  
GGCTCACATCTGCCGGGACGTCAACTACGGCTGACTTATCCGAAGCATTTCATGCCAA  
CGGCGCATCATTCTTTTTTCATTTGCATCTACCTACACATCGGCCGAGGGGCTCTACTAT  
GGCTCATACCTCTATAAAGAAACATGAACTATTGGAGTCGTCTCTCTCTCTCTGTA  
ATAATAACGGCCTTCGTTCGGATACGTCTCTCTCTCTCTCTCTCTCTCTCTCTCTCT  
GCAACCGTTATTACCAACCTCCTATCCGCCGTCCCCTATGTTGGCGACACCCTAGTC  
CAATGGATTTGAGGTGGTTTTTCTGTAGACAATGCTACCCTTACCCGGTTCTTTGCCT  
TCCACTTCCTTTTCCCCTTCATCATCGCCGCCGCAACAGTAATCCATCTACTATTTCT  
TCACGAAACTGGCTCAAATAATCCCACCGGCTTAAACTCAGACTCAGACAAGGTTCC  
CTTCCACCCTTACTTCACTTACAAAGACCTCTTGGTTTTTGCAGTGCTCCTCACTGCAT  
TAGCATCCCTCGCTTTGTTTTCTCCTAATCTTTTAGGAGACCCAGATAACTTTACCCC  
CGCAAATCCACTTGTTACACCCCCACACATTAAACCAGAGTGATACTTCCTCTTTGC  
TTACGCTATTCTCCGGTCCATCCCAAACAACTTGAGAGCGTTCTTGCCCTTTTATTT  
TCGATCTTAGTTCTCATGCTTGTCCCCTTCCTTCACACCTCTAAACAACGCAGCCTAA  
TGTTTCGCCCTCTAACGCAATTTTTGTTCTGGTCTCTGGTAGCAGACGTTATAATTCT  
AACTTGAATTGGAGGAATGCCCCGTAGAACACCCCTTCGTTATCATTGGACAAGTAGC  
ATCACTCCTTTACTTCGCCCTCTTTCTAGTCCTAATCCCAACAGCAGGTTTACTAGAG  
AATAAAGTCCTTGGAATGAAAATATGATTTCAACTCTCATTACCCATATTATTAACCC  
CCTAACCTTTATTGTACCTGTACTGCTAGCCGTAGCATTCTCACCCTCCTTGAACGG  
AAAGTCCTAGGCTACATACTCCGAAAAGGGCCTAACATCGTAGGGCCTTACGG  
CCTCCTTCAACCCATTGCTGACGGCGTAAACTCTTTATTAAAGAACCCGTTTCGGCC  
TTCCACCGCATCCCCCGTTCTGTTCCCTCCTGGCCCCCTATACTCGCACTCACACTGGCC  
CTAACCCCTTTGAGCCCCGATGCCTTTCCCGTACCCTGTTGTGGACCTTAACCTGGGTA  
TCCTTTTTATTCTAGCACTATCTAGCCTTGCAGTATACTCTATTCTTGGGTCTGGTTG  
AGCATCCAATTCAAATAACGCTTTAGTAGGAGCACTACGAGCTGTTGCACAAACAA  
TTTCTTACGAAGTTAGCCTAGGACTCATCCTCCTTAACATCATCATCTTTACCGGAGG  
ATTTACACTTCAGACCTTTAACACAGCCCAAGAGGCCATCTGACTAGTTGTACCCGC  
CTGACCCCTCGCTGCCATATGATACATCTCCACTCTTGCCGAAACAAACCGTGCACC  
CTTCGACCTAACAGAAGGGGAATCTGAACTTGTTTCAGGCTTCAACGTAGAAATACGC  
AGGAGGACCCTTCGCTTTGTTCTTTTTAGCCGAATACTCAAATATCCTCCTAATAAAT  
ACCCTGTCCGCAACATTATTTTTGGGCGCCTCCCACATTCCCTCTATCCCAGAATTAA  
CTAGCATTAATATTATAACTAAAGCAGCCCTTCTCTCAATTGTTTTTCTGTGAGTCCG  
AGCTTCGTACCCGCGATTCCGTTACGACCAACTTATGCACCTCATTGAAAGAACTT  
TCTTCCACTGACTTTAGCACTAGTTATTTGACACTTAGCGCTCCCTATTGCATTCGCT

GGTCTCCCACCACAACACTATAAATGAACCCCTACATCTTGACTACTCTTATATTTGGTT  
TGGGCCTAGGAACAACACTTACGTTTGCAAGCTCACACTGACTCCTCGCTTGAATAG  
GCCTCGAAATTAATACACTAGCCATTATTCCGCTAATAGCCCAACATCATCACCCCC  
GAGCAGTCGAAGCTACTACTAAATACTTTCTCGCACAAGCCACAGCAGCCGCTACCC  
TCTTGTTTGCAAGTACCACCAACGCATGACTAACAGGCCAATGAGACATCCAACAA  
ATAACACACCCCCCTCCCCACAACAATAATTGTTATTGCCCTAGCACTAAAAATTGGA  
CTAGCACCAATACACTCTTGACTTCCAGAAGTACTTCAAGGACTAGACCTTACCACC  
GGACTAATCCTCTCGACTTGACAAAACTTGACCCCTTTGCCCTATTACTACAAATT  
CAAGCAACAACCCCTACGCCTCTAATCATTATTGGTTTACTATCCACCCTCGTTGGGG  
GATGAGGTGGTCTCAATCAAACCTCAATTACGTAAAGTCCTGGCCTACTCCTCGATTG  
CCCATCTTGGCTGAATAATACTAATCATTTCAGTTTTTCACCCCTCCTCGCCCTCCTTGC  
CCTACTCACGTATTTTCTATGACTTTTTTCAGCATTCTAATCTTTAAAGTAAACAAGG  
CTACCCTGTCAATGCCCTCGCAATCTCATGAACAAAAACCCCTGCCCTCACAGCCC  
TAGCACCCCTAGTCTTATTGTCCCTTGGTGGCCTCCCTCCCCTTACCGGCTTCATACC  
CAAATGATTTATTCTTCAAGAGCTGACTAAGCAGGACCTCCCACCCTTGCTACCCTC  
GCCGCATTAACTGCCCTCTTAAGCCTTTACTTCTACTTGCGCCTCTCGTACGCGATAA  
CCCTGACAATGTTCCCTAACAACCTCGTCGGCGTTACCCCTGACGGTTCTATTCTCC  
CCAATTTACGCTTCCCCTCGCCATGTCCACTGCAGCAACCACCCTTCTTCTCCCACTA  
GCCCCTGCTGCTGTAGCACTACTCATAGCTTATGAGCCTTCTTCTAACCATCATTTC  
ATCGCCACCCTCCTCTCAACAGTACTTGCCATTGTATCCTTTTGACTCCCCCAAATTA  
CACCAGACCATGAAAAGCTATCACCATAACGAATGCGGCTTTGACCCGATAGGCTCT  
GCCCGACTACCTTTTTTCGCTGCGATTTTTTCTCATCGCCATCCTCTTTCTCCTGTTTGA  
CTTAGAGATTGCACTCCTCCTCCCCCTTCCCTGAGGAGACCAATTAGCATCGCCACT  
ACTCACATTCACTTGAGCTACAGCTGTCTAGCGCTTCTAACCCTTGGCCTCATTTAC  
GAATGAATGCAAGGAGGCCTAGAGTGAGCTGAATATGCTAAAAATCCTAATTCCAA  
CACTTATGCTAATCCCAACAGCCTGGTTACTCAAACCCAGCTGACTCTGGCCCATAA  
CCTTGATGTATAGCTTTTGCATCTCCTTAATTAGCCTTTCATGATTGAAGAACCTCTC  
AGAAACCGGCTGATCATCACTTAACCTCTTTATAGCCACCGACTCCCTATCAACCCC  
CCTCCTCGTTCTCACATGCTGACTGCTACCACTAATGATTTTGGCAAGCCAAAAACA  
CACAGCCTCAGAGCCTCTTGGTGCGCCAGCGCATGTACATTACACTTCTCGCCTCCTC  
CAGTTCTTCCTGATTCTAGCATTTAGCGCCACTGAGCTGGTAATGTTTTACGTAATAT  
TTGAAGCCACCCTCATCCCCACTCTGATTATTATTACCCGCTGAGGGAACCAACAG  
AACGCCTAAATGCAGGGACCTACTTTCTTTTTTACACATTGGCAGGCTCACTACCTCT  
TCTCGTTGCTTTACTTCTTCTCCAGAACACATCCGGCACCCCTGTGCTTGTTAACCCTA  
CACTATACAGACCCACTCACTCTCATCTTATGCAGACAAATTATGATGAGCAGGCTG  
TCTCTTAGCATTCCTCGTTAAATACCTCTCTATGGGGTCCACCTGTGACTCCCTAAA  
GCCCACGTTGAAGCCCCCATTGCAGGCTCAATGATCCTTGACGCGGTTCTCTTAAAA  
CTGGGAGGATATGGCATGATCCGCATAATAACAATATTAGAGCCTCTAACTAAGGA  
GCTAAGCTACCCCTTCATTGTCTTTGCACTTTGAGGGGTAATCATAACTGGCTCAATT  
TGTCTACGACAGACAGACCTTAAGTCCCTAATTGCCTACTCATCTGTAAGTCACATG  
GGCCTGGTGGCCGGGGGAATTCTTATTTCAGTCACCCTGGGGCTTAACAGGGGGCCCTT  
ACCCTAATAATTGCACACGGTCTTACCTCATCAGCCCTCTTCTGCCTAGCAAACACA  
AACTATGAACGAACCCACAGTCGAACGATAGTACTAGCACGAGGGCTTCAAGTAGC  
TCTACCATTGATGGCCACTTGATGATTTATTTCTAGCTTAGCCAACCTAGCCCTTCCA  
CCACTACCTAACCTCATAGGTGAACTAATAATTATTACTTCTCTATTCAACTGATCCT  
GGTGAACCTTAGCATTAAACGGGGGAGGCACTCTAATTACAGCTGGTTACTCCCTTT  
ATATGTTCTTAATAACTCAACGGGGGCTCTCCCAGCACATATCATTGCGCTTGAGC  
CATCTCACACCCGAGAACACCTCCTTATTGCCTTCATCTTATCCCCTTGATTCTCCTC

GTGCTTAAGCCCGAGCTGATCTGAGGTTGGACTGCCTATGACCCCCACACACTTTGC  
CTTCTCCTCAGCCTTTTCTTCTGGGTTTAACAGGCCTGGCATTTCACCGGTTCCACCTC  
CTTTCCGCTTTATTATGTCTTGAAGGAATAATATTATCCCTATTTATTGCCCTCTCCCT  
ATGGACACTCCAACCTTGACTCAACAACTTTTCAGCATCTCCTATGCTTCTACTTGCA  
TTTTCAGCCTGCGAAGCAAGCGCCGGCCTCGCCCTGCTAGTAGCCACTGCTCGAACC  
CACGGAACCGACCGACTACAAAGCCTAAATCTTCTCCAATGCTAAATGCACCCACC  
TCCCTAATGATTTTCGTCAAGCCTGATCACAATCTTTGCATTGCTAGCCTATCCCCTAG  
TCACCACAATACGACCCACGCCCCAAGAACCTCAGTGGGCTTCTACCCATGTTAAAA  
CAGCTGTAAAAATAGCTTTTCTTTGTTAGTCTGTTACCCCTGACCCTATTTCTTAACGA  
GGGTGCCGAGACAATCGTTACTAACTGAACCTGAATAAATACTAACTCCTTCGACAT  
CAACATTAGCCTAAAATTTGACTTCTACTCAATTATTTTTACCCCCATTGCCCTCTAC  
GTAACCTGGTCCATCCTAGAATTTGCATTATGATACATGCATGCAGACCCGAACATG  
AACCGCTTCTTCAAGTATCTACTGACATTTCTGATTGCCATAATCGTTCTCGTAACCG  
CAAACAATATGTTTCAACTATTCATCGGTTGAGAGGGTGTGGGGATCATATCGTTCC  
TCCTTATCGGGTGGTGGTTCGGACGGGCGGATGCTAACACTGCAGCACTTCAAGCAG  
TACTTTACAACCGGGTTGGGGACATCGGTCTTATCTTCGCCATGGCTTGAATAGCAG  
CAAACCTGAACTCCTGGGAAATGCAACAAATCTTTGTAACCTCCAAAGACATAGAC  
TTAACTTATCCTCTCCTCGGGCTCATCATCGCAGCAACCGGCAAGTCGGCTCAATTT  
GGTCTTCACCCCTGACTACCTCCGCTATGGAGGGTCTACACCGGTCTCTGCCCTA  
CTTCATTCTAGCACTATAGTCGTTGCCGGCATTTCCTGCTGGTCCGAATGAGCCCCC  
TCCTGGAAAACAACCAAACCTGCCCTCACAACCTGCCTGTGCCTCGGGGCCCTTACAA  
CACTGTTTACTGCAACCTGTGCCCTCACACAAAATGATATTAATAAAAAATCGTCGCAT  
TCTCCACATCAAGCCAGCTTGGACTTATGATGGTAACCATTGGACTAAACCAACCAC  
AACTAGCGTTTCTTCACATTTGCACACACGCTTTCTTCAAGGCCATGCTATTTTTATG  
CTCCGGATCTATTATTCATAGTCTTAATGACGAACAAGACATCCGAAAAATAGGAG  
GCATACACCACCTTGCACCTTTTACATCCTCTTGCCTAACTATTGGCAGTCTTGCCCT  
TACAGGGACCCCCTTCTTAGCTGGCTTCTTCTCTAAAGATGCTATCATCGAAGCACT  
AAACACATCCCACCTAAACGCCTGAGCCCTAACTTTAACCCCTCCTAGCCACCTCTTT  
CACAGCAATTTACAGCTTTTCGAGTAGTATTTTTTGTGCCCATGGGTACCCCCGGTTT  
AATCCCTCTCCCCCATCAACGAAAACAACCCAGCAGTGATTAACCCACTTAAGCGAT  
TAGCATGAGGAAGCATCGTTGCAGGCTTACTAATTACTTCTAACATCACACCCCTAA  
AAACCCCTGTTATATCTATACCCCCTCTCCTTAAACTAGCTGCTCTTGCAGTAACAAT  
CCTTGGCCTACTTGTTGCTATGGAACCTCGCCATGCTAACTAATAAGCAATATAAATC  
AATACCCGACACAACGTACACCACCTTCTCCACCTTGTTAGGCTTCTTCCCCGGAGTA  
ATGCACCGCCTAGCCCCTAAATTACTCTTCTTCTAGGCCAAAACGTTGCCAACCAA  
ACAGTAGATCAAACCTGGCTAGAAAAAATCGGCCCCCAAAGCCATTGAGTCCTCTAA  
CCGACCCCTGATCTCTTCTACAAGTAACATTCAGCGAGGAGTAATCAAGACATATCT  
CCCCTTTTCTCCTAACACTAGCCCTTATAATCCCCTATTTCATCGCCTAATGACTTT  
TGCTATATATTTAGTTTTATTTTCTCTCGTGTTAGGGTTAGTTGCAGTTGCTTCTAATC  
CATCTCCTTATTTTCGCTGCTTTGGGTTTGGTTGTAGTAGCTGGGATGGGGTGTGGTAT  
ATTAGTTGGGCATGGGGGGCCTTTTTTGTCACTAGTTTTGTTCTTAATTTACTTGGGC  
GGGATGCTAGTTGTATTTGCATACTCCGCAGCGTTAGCTGCTGAGCCGTATCCGGAG  
AGCTGGGGTAGTTGGTCGGTAATGGTTTATGGTAGTTTACACAGGAGGGGTAATGTA  
GTTTCTGGGCTGTTCTGAGGGGGGTGATACGAGTCGTCTTGGGTCCTAGCAGATGAG  
TTGGCGGAGTTCTCCGTGTTTCGGGGGGATATCGGAGGTGTAGCTTTAATATATTCT  
TCTGGGGGGTGGTTATTAATTATTAGCGCGTGGGTATTGCTTTTAACTTTGTTTGTGG  
TTCTCGAGTTGACCGGGGTATAAGTCGAGGGGCGTTGCGGCAGTTT"/>



<sequence id="seq\_Reinhardtius\_hippoglossoides\_AM749131" spec="Sequence"  
taxon="Reinhardtius\_hippoglossoides\_AM749131" totalcount="4"  
value="ATGATACTAAGCTTTTTTGACCAATTTATATCCCCAGTATACCTCGGTATTCC  
GCTAATTGCACTAGCAATTACCCTCCCCTGAATTCTGTTCCCAACCCCTCAAGCCGCT  
GATTAAACAACCGTGTGCTAACACTTCAAGGATGGTTTATTAGCCGCTTCACCTCAC  
AACTTCTTCTTCCCCTAAACCCCGGGGGCCACAAATGAGCAGTTTTATTACCTCATT  
AATGTTTTTCTTTTCTATTAACATACTAGGACTCCTTCCATATACCTTCACACCAACA  
ACCCAATCTCCCTTAATATGGGCCTCGCAGTTCCCCTCTGATTAGCAACTGTCATTA  
TGGAATGCGAAATCAACCTACACATGCCCTAGGTCACCTCCTTCCAGAAGGCACCCC  
TACTGCTCTCATCCCTGTACTCATCATCATTGAAACAATTAGCCTATTTATTCGACCC  
CTCGCTCTCGGTGTTGACTAACAGCGAATCTCACAGCAGGCCACCTCCTTATTCAA  
CTCATTGCAACAGCTGCCTTTGTCCTTCTTCCGCTCATACCTGTTGTTGCTATCTTAA  
CAACGGTGGTCCCTCTTCCCTTCTTACTCTGCTAGAAGTCGCGGTGCGCATGATCCAAG  
CCTATGTCTTTGTTCTACTCTTAAGCCTATATCTACAAGAGAACGTTTAATGCCTCAA  
CTGAACCCCGCACCCCTGATTTGCAATTTTAGTTTTCTTGAATAATCTTTTTAACTG  
TTATTCCCCCAAAGTTTTAGCACATACTTACCCCAATGAACCTACCTCCCAAAGCA  
CACAAAAACAAAACAGAACCCTGAAACTGACCATGATACTAAGTGGCAATCACACG  
TTGATTTTTCTCGACCAATCACAAAGACATCGGCACCCTCTATCTCGTATTTGGTGCC  
TGAGCCGGTATAGTGGGAACAGGCCTAAGTCTGCTTATTCGGGCAGAACTAAGCCA  
ACCTGGGGCTCTCCTTGGAGACGACCAAATTTATAACGTAATCGTCACCGCACACGC  
CTTTGTAATAATCTTTTTTATAGTAATACCCATTATGATCGGGGGTTTCGGAACTGG  
CTTATTCCACTAATAATTGGAGCCCCAGATATGGCTTTCCTTCGAATAAATAACATG  
AGTTTCTGACTTCTTCCCCCATCCTTCTTCTCCTCTTAGCCTCTTCAGGTGTTGAAGC  
TGGGGCAGGTACGGGGTGAACCGTTTATCCACCACTAGCTGGTAATCTGGCCCACGC  
CGGAGCATCCGTTGACCTAACAATCTTCTCACTTCACCTTGCAGGGATTTCTGTCAATT  
CTGGGGGCAATTAACCTTTATTACTACCATCATCAACATGAAACCCACAACAGTTACT  
ATGTACCAAATCCCATTATTTGTTTGAGCCGTTCTAATTACCGCCGTAATTCTTCTTC  
TGTCCCTTCCCGTCTTAGCCGCAGGGATTACAATGCTACTAACAGACCGCAACCTCA  
ACACAACCTTTTTTGACCCCGCCGGAGGTGGTGACCCCATCCTCTATCAACACCTAT  
TCTGATTCTTTGGCCACCCAGAGGTATATATTCTCATTCTTCCAGGCTTCGGAATAAT  
TTCCCACATTGTTGCATACTATGCAGGTAAAAAAGAACCTTTTGGTTACATAGGAAT  
AGTCTGAGCTATAATAGCCATTGGACTCCTGGGATTCATTGTATGGGCCCATCACAT  
GTTTACAGTCGGGATAGACGTCGACACACGAGCCTACTTTACATCTGCCACAATAAT  
CATTGCAATCCCGACCGGCGTAAAGTCTTTAGCTGACTCGCAACCCCTCCACGGGGG  
AAGCATCAAATGAGAAACGCCACTTCTTTGGGGCCCTCGGCTTTATTTTCTCTTTACA  
GTAGGGGGTCTTACTGGCATTGTCTTGGCTAACTCCTCTCTTGACATTGTTCTGCATG  
ACACATACTATGTAGTAGCCCACTTCCACTATGTACTATCTATGGGTGCTGTATTTCG  
AATCGTTGCCGCCTTCGTCCACTGATTCCCCTATTTACAGGTTATACCTCCACTCC  
ACATGAACAAAAATCCACTTCGGCCTGATATTTATTGGGGTCAATCTAACATTCTTC  
CCCCAACACTTCTTGGGCCTAGCCGGAATGCCCCGACGATACTCAGACTACCCAGAC  
GCATATACCCTTTGAAACACTGTCTCATCAATCGGATCCCTAATGTCGCTCGTCGCT  
GTAATCTTATTTTTGTTTATTATTTGAGAAGCATTTACAGCCAAACGAGAAGTTGGG  
GCAGTAGAACTTACTGCAACTAACATCGAATGACTTTACGGCTGCCCTCCACCCTAC  
CACACATTTGAAGAGCCCGCATTCGTCCAAGTTCGAATAAACTAAATGGCACATCCC  
TCACAACTCGGATTTCAAGACGCAGCTTCACCCTTAATAGAAGAACTACTTCACTTC  
CACGATCACGCCTTAATAATTGTAATTCTCATCAGCACGATAGTACTTTATATTATTG  
CGGCTATAGTTACAGCCAACTAACAGATAAACTTGTTCTAGATTCTCAAGAAATTG  
AAATTATCTGAACAGTTCTCCAGCTGTTATTCTTATTCTCATCGCCCTACCATCTCT

CCGAATTTTGTACTTAATAGACGAAATTAATGATCCCCACTTAACAATCAAAGCCAT  
GGGCCACCAGTGGTACTGAAGCTACGAATACACAGACTATGAAGACCTCGGTTTTG  
ACTCTTACATAATCCCTACACAAGACCTGACCCCTGGACAGTTCGACTACTTGAAG  
CAGATCACCGGATAGTAATCCCGGTAGAATCTCCTATTCGCGTTCTAATCTCAGCTG  
AAGATGTATTACATTCCTGAGCAGTCCCCTCCCTGGGCGTAAAAGTTGACGCCGTAC  
CTGGACGATTAAATCAAGCAACCTTTATTGTTAGCCGGCCAGGCGTATTTTATGGTC  
AATGCTCTGAAATTTGCGGAGCGAACCATAGTTTTTATACCCATCGTTGTAGAAGCAG  
TCCCCCTTGAACACTTTGAAAACCTGGTCTTCACTAATAATTGAAGACGCCTATGGCC  
CATCAAGCACACCCATACCACATAGTCGACCCCCAGTCCATGACCCCTCACGGGGGCT  
ATTGCTGCCCTATTGATAACATCTGGCCTTGCTATCTGATTTCACTTCCATTCCACAA  
CCCTTATAACTATTGGGACAGTCCTTCTCACCTTAACAATCTTCCAATGATGACGGG  
ACGTCGTACGAGAAGGCACATTTCAAGGACACCACACTCCCCCTGTTCAAATAGGC  
CTCCGATACGGAATAATCTTATTTATTACCTCAGAAGTTCTGTTCTTCTTAGGCTTCT  
TCTGAGCCTTTTACCACTCAAGCCTAGCACCTACTCCAGAACTAGGAGGCTTCTGAC  
CCCCAGCAGGCATTACCCCTTTAGACCCATTTGAAGTCCCGCTTCTTAACACAGCAG  
TCCTCCTTGCCCTCTGGTGTAACCTGTTACCTGAGCACATCACAGCATTATAGAGGGTA  
AACGGAAACAACTATTCAATCTCTTGCCCTCACAATCTTACTCGGGGGTTACTTCA  
CTTTTCTCCAAGGCCTTGAGTATGTGGAAGCCCCCTTCACCATTGCAGACGGAGTTT  
ACGGTGCTACATTCTTTGTTGCCACCGGCTTCCACGGCCTCCACGTCTTAATTGGCAC  
CTCATTCTTAGCCGTTTGTCTGTTACGCCAAATCCTTCACCATTTTACATCAAACCAC  
CACTTTGGGTTTGAAGCAGCCGCATGATACTGACACTTCGTAGACGTCGTCTGACTT  
TTCTCTATATCTCTATTTACTGATGAGGATCTTAATGGCCAGTCTACGTAAATCCCA  
CCCTCTTCTAAAAATCGCAAACGATGCTTTAGTTGACCTCCCAGCCCCCTCTAATATC  
TCCGTTTGGTGAACTTTGGGTCTCTTCTAGGACTCTGTTTAGTAACCCAAATTGCTA  
CCGGCTTGTTTCTAGCCATACACTATACATCAGATATTGCTACTGCCTTCACCTCCGT  
GGCTCACATCTGCCGGGACGTCAACTACGGCTGACTTATCCGAAGCATTTCATGCCAA  
CGGCGCATCATTCTTTTTTCATTTGCATCTACCTACACATCGGCCGAGGACTCTACTAT  
GGCTCATACCTCTATAAAGAAACATGAACTATTGGAGTCGTCCTCCTCCTCCTCGTA  
ATAATAACGGCCTTCGTTCGGATACGTCCTCCCTTGAGGACAAATGTCGTTTTGAGGT  
GCAACCGTTATTACCAACCTCCTATCCGCCGTCCCCTATGTTGGCAACACCCTAGTC  
CAATGGATTTGAGGTGGTTTTTCTGTAGACAATGCTACCCTTACCCGGTTCTTTGCCT  
TCCACTTCCTTTTCCCCTTCATCATCGCCGCCGCAACAGTAATTCATCTACTATTTCTT  
CACGAACTGGCTCAAATAATCCCACCGGCTTAACTCAGACTCAGACAAGGTTC  
CTTCCACCCTTACTTCACTTACAAAGACCTCTTGGTTTTGCAGTGCTCCTCACTGCAT  
TAGCATCCCTCGCTTTGTTTTTACCTAATCTTTTAGGAGACCCAGATAACTTTACCCC  
CGCAAATCCACTTGTTACACCCCCACACATTAAACCAGAGTGATACTTCCTCTTTGC  
TTACGCTATTCTCCGGTCCATCCCAAACAACTTGGAGGCGTTCTTGCCCTTTTATTT  
TCGATCTTAGTTCTCATGCTTGTCCCCTTCCTTCACACCTCTAAACAACGCAGCCTAA  
TGTTCCGCCCTCTAACGCAATTTTTGTTCTGTTCTGTTAGCAGACGTTATAATTCT  
AACTTGAATTGGAGGAATGCCCCGTAGAACACCCCTTCGTTATCATTGGACAAGTAGC  
ATCACTCCTTTACTTCGCCCTCTTTCTGGTCCTGATCCCAACAGCAGGTTTACTAGAG  
AATAAAGTCCTTGATGAAAATATGATTTCAACTCTCATTACCCATATTATTAACCC  
CCTAACCTTTATTGTACCTGTATTGCTAGCCGTAGCATTCTCACCCTCCTTGAACGA  
AAAGTCCTAGGCTACATACAACTCCGAAAAGGGCCTAACATCGTAGGGCCTTACGG  
CCTCCTTCAACCCATTGCTGACGGCGTAAAACCTCTTTATTAAAGAACCCGTTTCGGCC  
TTCCACCGCATCCCCCGTTCTGTTCTCCTGGCCCCCTATACTCGCACTCACACTGGCC  
CTGACCCTTTGAGCCCCGATGCCTTTCCCGTACCCTGTTGTGGACCTTAACCTGGGTA  
TCCTTTTTTATTCTAGCACTATCTAGCCTTGCAGTATACTCTATTCTTGGGTCTGGTTG

AGCATCCAATTCAAAATACGCTTTAGTAGGAGCACTGCGGGCTGTTGCACAAACAA  
TTTCTTACGAAGTTAGCCTAGGACTCATCCTCCTTAACATCATCATCTTTACCGGAGG  
ATTTACACTTCAGACCTTTAACACGGCCCAAGAGGCCATCTGACTAGTTGTACCCGC  
CTGACCCCTCGCTGCCATATGATACATCTCCACTCTTGCCGAAACAAACCGTGCACC  
CTTCGACCTAACAGAGGGGGAATCTGAACTTGTTTCAGGCTTCAACGTAGAATACGC  
AGGAGGGGCCCTTCGCTTTGTTCTTTTTAGCCGAATACTCAAATATCCTCCTAATAAAT  
ACTCTGTCCGCAACATTATTTTTGGGCGCCTCCCACATTCCCTCTATCCCAGAATTAA  
CTAGCATTAATATTATAACTAAAGCAGCCCTTCTCTCAATTGTTTTTCTGTGAGTCCG  
AGCTTCGTACCCGCGATTCCGTTACGACCAACTTATGCACCTCATTTGAAAGAACTT  
TCTTCCACTGACTTTAGCACTAGTTATTTGACACTTAGCGCTCCCTATTGCATTTCGT  
GGTCTCCCACCACAACATAAATGAACCCCTACATCTTGACCCTCTTATATTTGGTT  
TGGGCCTAGGAACAACACTTACGTTTGCAAGCTCACACTGACTCCTCGCTTGAATAG  
GCCTCGAAATTAATACACTAGCCATTATTCCTAATAGCCCAACATCATCACCCCC  
GAGCAGTCGAAGCTACTACTAAATACTTTCTCGCACAAGCCACAGCAGCCGCTACCC  
TCTTGTTTGCAAGTACCACCAACGCATGACTAACAGGCCAATGAGACATCCAACAA  
ATAACACACCCCCCTCCCCACAACAATAATTGTTATTGCCCTAGCACTAAAAATTGGA  
CTAGCACCAATACACTCTTGACTTCCAGAAGTGCTTCAAGGACTAGACCTCACCACC  
GGACTTATCCTCTCGACTTGACAAAACTTGACCCCTTTGCCCTATTACTACAAATTC  
AAGCAACAACCCTACGCCTCTAATCATTATTGGCTTGCTATCCACCCTCGTTGGAGG  
ATGAGGTGGTCTCAATCAAACCTCAATTACGTAAAGTCCTCGCCTACTCCTCGATTGC  
CCATCTTGGCTGAATAATACTAATCATTCAAGTTTTACCCCTCCTCGCCCTCCTTGCC  
CTACTCACGTATTTTCTATGACTTTTTTCAGCATTCTTAATCTTTAAAGTAAACAAGGC  
TACCACTGTCAATGCCCTCGCAATCTCATGAACAAAAACCCCTGCCCTCACAGCCCT  
AGCACCCCTAGTCTTATTGTCCCTTGGTGGCCTCCCTCCCCTTACCGGCTTCATACCC  
AAATGATTTATTCTTCAAGAACTGACTAAGCAAGACCTCCCACCCTTGCTACCCTCG  
CCGCATTAAGTCCCTCTTAAGCCTTTACTTCTACTTGCGCCTCTCGTACGCGATAAC  
CCTGACAATGTTCCCTAACAACTCGTCGGCGTTACCCCTGACGGTTCTATTCTCCC  
CAATTTACGCTTCCCCTCGCCATGTCCACTGCAGCAACCACCCTTCTTCTCCCACTAG  
CCCCTGCTGCTGTAGCACTACTCATAGCTTATGAGCCTTCTTCTAACCATCATTTCAA  
TCGCCACCCTCCTCTCAACAGTACTTGCCATTGTATCCTTTTGACTCCCCCAAATTAC  
ACCAGACCATGAAAAGCTATCACCATACGAATGCGGCTTTGACCCGATAGGCTCTG  
CCCGACTACCTTTTTTCGCTGCGATTTTTTCTCATCGCCATCCTCTTTCTCCTGTTGAC  
TTAGAGATTGCACTCCTCCTCCCCCTTCCCTGAGGAGACCAATTAGCATCGCCACTA  
CTCACATTCACTTGAGCTACAGCTGTCCTAGCGCTTCTAACCCTTGGCCTCATTACG  
AATGAATGCAAGGAGGCCTAGAGTGAGCTGAATATGCTAAAAATCCTAATTCCAAC  
ACTTATGCTAATCCCAACAGCCTGGTTACTCAAACCCAGCTGACTCTGGCCCAATAAC  
CTTGATGTATAGCTTTTGCATCTCCTTAATTAGCCTTTCATGATTGAAGAACCTCTCA  
GAAACCGGCTGATCATCACTTAACCTCTTTATAGCCACCGACTCCCTATCAACCCCC  
CTCCTCGTTCTCACATGCTGGCTGCTACCACTAATGATTTTGGCAAGCCAAAAACAC  
ACAGCCTCAGAGCCTCTTGGTCGCCAGCGCATGTACATTACACTTCTCGCCTCCTCC  
AGTTCTTCCTGATTCTAGCATTTAGCGCCACTGAGCTGGTAATGTTTTACGTAATATT  
TGAAGCCACCCTCATCCCCACTCTGATTATTATTACCCGCTGAGGGAACCAAACAGA  
ACGCCTAAATGCAGGGACCTACTTTCTTTTTTACACATTGGCAGGCTCACTACCCCTT  
CTCGTTGCTTTACTTCTTCTCCAGAACACATCCGGCACCCCTGTCGTTGCTAACCCTAC  
ACTATACAGACCCACTCACTCTCATCTTATGCAGACAAATTATGATGAGCAGGCTGT  
CTCTTAGCATTCCTCGTTAAATACCTCTCTATGGAGTCCACCTGTGACTCCCTAAAG  
CCCACGTTGAAGCCCCCATTGCAGGCTCAATGATCCTTGACGCGGTTCTCTTAAAC  
TGGGAGGATATGGCATGATCCGCATAATAACAATATTAGAGCCTCTAACTAAGGAG

CTAAGCTACCCCTTCATTGTCTTTGCACTTTGGGGGGTAATCATAACTGGCTCAATTT  
GTCTACGACAGACAGACCTTAAGTCCCTAATTGCCTACTCATCTGTAAGTCACATGG  
GCCTAGTGGCCGGGGGAATTCTTATTTCAGTCACCCTGGGGCTTAACAGGGGGCCCTTA  
CCCTAATAATTGCACACGGTCTTACCTCATCAGCCCTCTTCTGCCTAGCAAACACAA  
ACTATGAACGAACCCACAGTCGAACGATAGTACTAGCACGAGGGCTTCAAGTAGCT  
CTACCATTGATGGCCACTTGATGATTTATTTCTAGCTTAGCCAACCTAGCCCTTCCAC  
CACTACCTAACCTCATAGGTGAACATAATAATTATTACTTCTCTATTCAACTGATCCTG  
GTGAACTCTAGCATTAAACGGGGCAGGCACTCTAATTACAGCTGGTTACTCCCTTTA  
TATGTTCTTAATAACTCAACGGGGACCTCTCCCAGCACATATCATTGCGCTTGAGCC  
ATCTCACACCCGAGAACACCTCCTTATTGCCTTCATCTTATCCCCTTGATTCTCCTCG  
TGCTTAAGCCCGAGCTGATCTGAGGTTGGACTGCCTATGACCCCCACAACTTTGCC  
TTCTCCTCAGCCTTTCTTCTGGGTTTAACAGGCCTGGCATTTCACCGGTTCCACCTCC  
TTCCGCTTTATTATGTCTTGAAGGAATAATACTATCCCTATTTATTGCCCTCTCCCT  
ATGAACACTCCAACTTGACTCAACAACTTTTCAGCATCTCCTATGCTTCTACTTGCA  
TTTTTCAGCCTGCGAAGCAAGCGCCGGCCTCGCCCTGCTAGTAGCCACTGCTCGAACC  
CACGGAACCGACCGACTACAAAGCCTAAATCTTCTCCAATGCTAAATGCACCCCACC  
TCCCTAATGATTTTCGTCAAGCCTGATCACAATCTTTGCATTGCTAGCCTATCCCCTAG  
TCACCACAATACGACCCACGCCCCAAGAACCTCAGTGGGCTTCTACCCATGTTAAAA  
CAGCTGTAAAAATAGCTTTCTTTGTTAGTCTGTTACCCCTGACCCTATTTCTTAATGA  
GGGTGCCGAGACAATCGTTACTAACTGAACCTGAATAAATACTAACTCCTTCGACAT  
CAACATTAGCCTAAAATTTGACTTCTACTCAATTATTTTTACCCCCATTGCCCTCTAC  
GTAACCTGGTCCATCCTAGAATTTGCATTATGATACATGCATGCAGACCCAAACATA  
AACCGCTTCTTCAAGTATCTACTGACATTTCTGATTGCCATAATCGTTCTCGTAACCG  
CAAACAATATGTTTCAACTATTCATCGGTTGAGAGGGTGTGGGGATCATATCGTTCC  
TCCTTATCGGGTGGTGGTTCGGACGGGCGGATGCTAACACTGCAGCACTTCAAGCAG  
TACTTTATAACCGAGTTGGGGACATCGGTCTTATCTTCGCCATGGCTTGAATAGCAG  
CAAACCTAAACTCCTGGGAAATGCAACAAATCTTTGTAACCTCCAAAGACATAGAC  
TTAACTTATCCTCTCCTCGGGCTCATCATCGCAGCAACCGGCAAGTCGGCTCAATTT  
GGTCTTCACCCCTGACTACCCTCCGCTATGGAGGGTCCTACACCGGTCTCTGCCCTA  
CTTCATTCTAGCACTATAGTCGTTGCCGGCATTTCCTGCTGGTCCGAATGAGCCCCC  
TCCTGGAAAACAACCAAACCTGCCCTCACAACCTGCCTGTGCCTCGGGGCCCTTACAA  
CACTGTTTACTGCAACCTGTGCCCTCACACAAAATGATATTAAAAAAATCGTCGCAT  
TCTCCACATCAAGCCAGCTTGGACTTATGATGGTAACCATCGGACTAAACCAACCAC  
AACTAGCGTTTCTTACATTTGCACACACGCTTTCTTCAAGGCCATACTATTTTTATG  
CTCCGGATCTATTATTCATAGTCTTAATGACGAACAAGACATCCGAAAAATAGGAG  
GCATACACCACCTTGCGCCTTTTACATCCTCTTGCCCTAACTATTGGCAGTCTTGCCCT  
TACAGGGGCCCCCTTCTTAGCTGGCTTCTTCTCTAAAGATGCTATCATCGAAGCACT  
AAACACATCCCACCTAAACGCCTGAGCCCTAACTTTAACCCCTCCTAGCCACCTCTTT  
CACAGCAATTTACAGCTTTTCGAGTAGTATTTTTTTGTGCCCATGGGTACCCCCGGTTT  
AATCCCTCTCCCCCATCAACGAAAATAACCCAGCAGTGATTAACCCACTTAAGCGAT  
TAGCATGAGGAAGCATCGTTGCAGGCTTACTAATTACTTCTAACATTACACCCCTAA  
AAACCCCTGTTATATCTATAACCCCTCTCCTTAAACTAGCTGCTCTTGCAAGTAACAAT  
CCTTGGCCTACTTGTTGCTATGGAACCTCGCCATGCTAACTAATAAGCAATATAAATC  
AATACCCGACACAACGTACACCCTTCTCCACCTTGTTAGGCTTCTTCCCCGGAGTA  
ATGCACCGCCTAGCCCCTAAATTACTCTTCTTCTAGGCCAAAACGTTGCCAACCAA  
ACAGTAGATCAAACCTGGCTAGAAAAAATCGGCCCAAAGCCATTGAGTCCTCTAA  
CCGACCCCTGATCTCTTCTACAAGTAACATTCAGCGAGGAGTAATCAAGACATATCT  
CCCCTTTTCCTCCTGACACTAGCCCTTATAATCCCCTATTTCATCGCCTAATGACTTT

TGCTATATATTTAGTTTTATTTTCTCTCGTGTTAGGGTTAGTTGCAGTTGCTTCTAATC  
CATCTCCTTATTTTCGCTGCTTTGGGTTTGGTTGTAGTAGCTGGGATGGGGTGTGGTAT  
ATTAGTTGGGCATGGGGGGCCTTTTTTGTCACTAGTTTTGTTCTTAATTTACTTGGGT  
GGGATGCTAGTTGTATTTGCATACTCCGCAGCGTTAGCTGCTGAGCCGTATCCGGAG  
AGCTGGGGTAGTTGGTCGGTAATGGTTTATGGTAGTTTATACAGGAGGGGTAATGTA  
GTTTCTGGGCTGTTCTGAGGGGGGTGATACGAGTCGTCTTGGGTCCTAGCAGATGAG  
TTGGCGGAGTTCTCCGTGTTTCGGGGGGATATCGGAGGTGTAGCCTTAATATATTCT  
TCTGGGGGGTGGTTATTAATTATTAGTGCGTGGGTATTGCTTTTAACTTTGTTTGTGG  
TTCTCGAGTTGACCGGGGTATAAGTCGAGGGGCGTTGCGGCAGTTT"/>

<sequence id="seq\_Reinhardtius\_hippoglossoides\_AM749132" spec="Sequence"  
taxon="Reinhardtius\_hippoglossoides\_AM749132" totalcount="4"  
value="ATGATACTAAGCTTTTTTGACCAATTTATATCCCCAGTATACCTCGGTATTCC  
GCTAATTGCACTAGCAATTACCCTCCCCTGAATTCTGTTCCCAACCCCTCAAGCCGCT  
GATTAACAACCGTGTGCTAACACTTCAAGGATGGTTTATTAGCCGCTTCACCTCAC  
AACTTCTTCTTCCCCTAAACCCCGGGGGCCACAAATGAGCAGTTTTATTACCTCATT  
AATGTTTTTCTTTTCTATTAACATACTAGGACTCCTTCCATATACCTTCACACCAACA  
ACCCAACCTCTCCCTTAATATGGGCCTCGCAGTTCCCCTCTGATTAGCAACTGTCATTA  
TGGAATGCGAAATCAACCTACACATGCCCTAGGTCACCTCCTTCCAGAAGGCACCCC  
TACTGCTCTCATCCCTGTACTCATCATCATTGAAACAATTAGCCTATTTATTCGACCC  
CTCGCTCTCGGTGTTGACTAACAGCGAATCTCACAGCAGGCCACCTCCTTATTCAA  
CTCATTGCAACAGCTGCCTTTGTCTTCTTCCGCTCATACTGTTGTTGCTATCTTAA  
CAACGGTGGTCCTCTTCCTTCTTACTCTGCTAGAAGTCGCGGTGCGCATGATCCAAG  
CCTATGTCTTTGTTCTACTCTTAAGCCTATATCTACAAGAGAACGTTTAATGCCTCAA  
CTGAACCCCGCACCCCTGATTTGCAATTTTAGTTTTCTCTTGAATAATCTTTTTAACTG  
TTATTCCCCCAAAGTTTTAGCACATACTTACCCCAATGAACCTACCTCCCAAAGCA  
CACAAAAACAAAACAGAACCCCTGAACTGACCATGATACTAAGTGGCAATCACACG  
TTGATTTTTCTCGACCAATCACAAAGACATCGGCACCCTCTATCTCGTATTTGGTGCC  
TGAGCCGGTATAGTGGGAACAGGCCTAAGTCTGCTTATTCGGGCAGAACTAAGCCA  
ACCTGGGGCTCTCCTTGGAGACGACCAAATTTATAACGTAATCGTCACCGCACACGC  
CTTTGTAATAATCTTTTTTATAGTAATACCCATTATGATCGGGGGTTTCGGAACTGG  
CTTATTCCACTAATAATTGGAGCCCCAGATATGGCTTTCCTCGAATAAATAACATG  
AGTTTCTGACTTCTTCCCCCATCCTTTCTTCTCCTCTTAGCCTCTTCAGGTGTTGAAGC  
TGGGGCAGGTACGGGGTGAACCGTTTATCCACCACTAGCTGGTAATCTGGCCACGC  
CGGAGCATCCGTTGACCTAACAATCTTCTCACTTCACCTTGCAGGGATTTCGTCAATT  
CTGGGGGCAATTAACCTTTATTACTACCATCATCAACATGAAACCCACAACAGTTACT  
ATGTACCAAATCCCATTATTTGTTTGAGCCGTTCTAATTACCGCCGTAATTCTTCTTC  
TGTCCCTTCCCGTCTTAGCCGCAGGGATTACAATGCTACTAACAGACCGCAACCTCA  
ACACAACCTTTTTTGACCCCGCCGGAGGTGGTGACCCCATCCTCTATCAACACCTAT  
TCTGATTCTTTGGCCACCCAGAGGTATATATTCTCATTCTTCCAGGCTTCGGAATAAT  
TTCCACATTGTTGCATACTATGCAGGTAAAAAAGAACCTTTTGGTTACATAGGAAT  
AGTCTGAGCTATAATAGCCATTGGACTCCTGGGATTCATTGTATGGGCCCATCACAT  
GTTTACAGTCGGGATAGACGTCGACACACGAGCCTACTTTACATCTGCCACAATAAT  
CATTGCAATCCCGACCGGCGTAAAAGTCTTTAGCTGACTCGCAACCCCTCCACGGGGG  
AAGCATCAAATGAGAAACGCCACTTCTTTGGGGCCCTCGGCTTTATTTTCTCTTTACA  
GTAGGGGGTCTTACTGGCATTGTCTTGGCTAACTCCTCTCTTGACATTGTTCTGCATG  
ACACATACTATGTAGTAGCCCACTTCCACTATGTACTATCTATGGGTGCTGTATTTCG  
AATCGTTGCCGCCTTCGTCCACTGATTCCCACTATTTACAGGTTATACCCTCCACTCC  
ACATGAACAAAAATCCACTTCGGCCTGATATTTATTGGGGTCAATCTAACATTCTTC

CCCCAACACTTCCTGGGCCTAGCCGGAATGCCCCGACGATACTCAGACTACCCAGAC  
GCATATACCCTTTGAAACACTGTCTCATCAATCGGATCCCTAATGTCGCTCGTCGCT  
GTAATCTTATTTTTGTTTATTATTTGAGAAGCATTTACAGCCAAACGAGAAGTTGGG  
GCAGTAGAACTTACTGCAACTAACATCGAATGACTTTACGGCTGCCCTCCACCCTAC  
CACACATTTGAAGAGCCCCGCATTCGTCCAAGTTCGAATAAACTAAATGGCACATCCC  
TCACAACCTCGGATTTCAAGACGCAGCTTCACCCTTAATAGAAGAACTACTTCACTTC  
CACGATCACGCCTTAATAATTGTAATTCTCATCAGCACGATAGTACTTTATATTATTG  
CGGCTATAGTTACAGCCAACTAACAGATAAACTTGTTCTAGATTCTCAAGAAATTG  
AAATTATCTGAACAGTTCTCCCAGCTGTTATTCTTATTCTCATCGCCCTACCATCTCT  
CCGAATTTTGTACTTAATAGACGAAATTAATGATCCCCACTTAACAATCAAAGCCAT  
GGGCCACCAGTGGTACTGAAGCTACGAATACACAGACTATGAAGACCTCGGTTTTG  
ACTCTTACATAATCCCTACACAAGACCTGACCCCCGGACAGTTCCGACTACTTGAAG  
CAGATCACCGGATAGTAATCCCGGTAGAATCTCCTATTTCGCGTTCTAATCTCAGCTG  
AAGATGTATTACATTCCTGAGCAGTCCCCTCCCTGGGCGTAAAAGTTGACGCCGTAC  
CTGGACGATTAAATCAAGCAACCTTTATTGTTAGCCGGCCAGGCGTATTTTATGGTC  
AATGCTCTGAAATTTGCGGAGCGAACCATAGTTTTTATACCCATCGTTGTAGAAGCAG  
TCCCCCTTGAACACTTTGAAAACCTGGTCTTCACTAATAATTGAAGACGCCTATGGCC  
CATCAAGCACACCCATAACCACATAGTCGACCCCAGTCCATGACCCCTCACGGGGGCT  
ATTGCTGCCCTATTGATAACATCTGGCCTTGCTATCTGATTTCACTTCCATTCCACAA  
CCCTTATAACTATTGGGACAGTCCTTCTCACCTTAACAATCTTCCAATGATGACGGG  
ACGTCGTACGAGAAGGCACATTTCAAGGACACCACACTCCCCCTGTTCAAATAGGC  
CTCCGATACGGAATAATCTTATTTATTACCTCAGAAGTTCTGTTCTTCTTAGGCTTCT  
TCTGAGCCTTTTACCACTCAAGCCTAGCACCTACTCCAGAACTAGGAGGCTTCTGAC  
CCCCAGCAGGCATTACCCCTTTAGACCCATTTGAAGTCCCGCTTCTTAACACAGCAG  
TCCTCCTTGCCCTCTGGTGTAACCTGTTACCTGAGCACATCACAGCATTATAGAGGGTA  
AACGGAAACAACTATTCAATCTCTTGCCCTCACAATCTTACTCGGGGGTTACTTCA  
CTTTTCTCCAAGGCCTTGAGTATGTCGAAGCCCCCTTCACCATTGCAGACGGAGTTT  
ACGGTGCTACATTCTTTGTTGCCACCGGCTTCCACGGCCTCCACGTCTTAATTGGCAC  
CTCATTCTTAGCCGTTTGTCTGTTACGCCAAATCCTTCACCATTTTACATCAAACCAC  
CACTTTGGGTTTGAAGCAGCCGCATGATACTGACACTTCGTAGACGTCGTCTGACTT  
TTCCTCTATATCTCTATTTACTGATGAGGATCTTAATGGCCAGTCTACGTAAATCCCA  
CCCTCTTCTAAAAATCGCAAACGATGCTTTAGTTGACCTCCCAGCCCCCTCTAATATC  
TCCGTTTGGTGAACTTTGGGTCTCTTCTAGGACTCTGTTTAGTAACCCAAATTGCTA  
CCGGCTTGTTTCTAGCCATACACTATACATCAGATATTGCTACTGCCTTCACCTCCGT  
GGCTCACATCTGCCGGGACGTCAACTACGGCTGACTTATCCGAAGCATTTCATGCCAA  
CGGCGCATCATTCTTTTTTCATTTGCATCTACCTACACATCGGCCGAGGACTCTACTAT  
GGCTCATACCTCTATAAAGAAACATGAACTATTGGAGTCGTCCTCCTCCTCCTCGTA  
ATAATAACGGCCTTCGTCGGATACGTCCCTCCCTTGAGGACAAATGTCGTTTTGAGGT  
GCAACCGTTATTACCAACCTCCTATCCGCCGTCCCCTATGTTGGCAACACCCTAGTC  
CAATGGATTTGAGGTGGTTTTTCTGTAGACAATGCTACCCTTACCCGGTTCTTTGCCT  
TCCACTTCCTTTTCCCCTTCATCATCGCCGCCGCAACAGTAATTCATCTACTATTTCTT  
CACGAAACTGGCTCAAATAATCCCACCGGCTTAACTCAGACTCAGACAAGGTTC  
CTTCCACCCTTACTTCACTTACAAAGACCTCTTGGTTTTTGAGTGCTCCTCACTGCAT  
TAGCATCCCTCGCTTTGTTTTACCTAATCTTTTAGGAGACCCAGATAACTTTACCCC  
CGCAAATCCACTTGTTACACCCCCACACATTAAACCAGAGTGATACTTCCTCTTTGC  
TTACGCTATTCTCCGGTCCATCCCAAACAACTTGAGAGGCGTTCTTGCCCTTTTATTT  
TCGATCTTAGTTCTCATGCTTGTCCTTCCTTCACACCTCTAAACAACGCAGCCTAA  
TGTTCCGCCCTCTAACGCAATTTTTGTTCTGGTCTCTGGTAGCAGACGTTATAATTCT

AACTTGAATCGGAGGAATGCCCCGTAGAACACCCCCTTCGTTATCATTGGACAAGTAGC  
ATCACTCCTTTACTTCGCCCTCTTTCTAGTCCTGATCCCAACAGCAGGTTTACTAGAG  
AATAAAGTCCTTGGATGAAAATATGATTTCAACTCTCATTACCCATATTATTAACCC  
CCTAACCTTTATTGTACCTGTATTGCTAGCCGTAGCATTCCCTACCCTCCTTGAACGG  
AAAGTCCTAGGCTACATACTCCGAAAAGGGCCTAACATCGTAGGGCCTTACGG  
CCTCCTTCAACCCATTGCTGACGGCGTAAAACTCTTTATTAAAGAACCCGTTCCGCC  
TTCCACCGCATCCCCCGTTCTGTTCCCTCGGCCCTATACTCGCACTCACACTGGCC  
CTAACCCCTTTGAGCCCCGATGCCTTTCCCGTACCCTGTTGTGGACCTTAACCTCGGTA  
TCCTTTTTATTCTAGCACTATCTAGCCTTGCAGTATACTCTATTCTTGGGTCTGGTTG  
AGCATCCAATTCAAAATACGCTTTAGTAGGAGCACTGCGGGCTGTTGCACAAACAA  
TTTCTTACGAAGTTAGCCTAGGACTCATCCTCCTTAACATCATCATCTTTACCGGAGG  
ATTTACACTTCAGACCTTTAACACGGCCCAAGAGGCCATCTGACTAGTTGTACCCGC  
CTGACCCCTCGCTGCCATATGATACATCTCCACTCTTGCCGAAACAAACCGTGCACC  
CTTCGACCTAACAGAGGGGGAATCTGAACTTGTTTCAGGCTTCAACGTAGAATACGC  
AGGAGGGGCCCTTCGCTTTGTTCTTTTTAGCCGAATACTCAAATATCCTCCTAATAAAT  
ACCCTGTCCGCAACATTATTTTTGGGCGCCTCCCACATTCCCTCTATCCCAGAATTAA  
CTAGCATTAATATTATAACTAAAGCAGCCCTTCTCTCAATTGTTTTTCTGTGAGTCCG  
AGCTTCGTACCCGCGATTCCGTTACGACCAACTTATGCACCTCATTTGAAAGAACTT  
TCTTCCACTGACTTTAGCACTAGTTATTTGACACTTAGCGCTCCCTATTGCATTGCT  
GGTCTCCCACCACAACATAAATGAACCCCTACATCTTGACCACTCTTATATTTGGTT  
TGGGCCTAGGAACAACACTTACGTTTGCAAGCTCACACTGACTCCTCGCTTGAATAG  
GCCTCGAAATTAATACACTAGCCATTATTCCACTAATAGCCCAACATCATCACCCCC  
GAGCAGTCGAAGCTACTACTAAATACTTTCTCGCACAAGCCACAGCAGCCGCTACCC  
TCTTGTTTGCAAGTACCACCAACGCATGACTAACAGGCCAATGAGACATCCAACAA  
ATAACACACCCCCTCCCCACAACAATAATTGTTATTGCCCTAGCACTAAAAATTGGA  
CTAGCACCAATACACTCTTGACTTCCAGAAGTGCTTCAAGGACTAGACCTCACCACC  
GGACTTATCCTCTCGACTTGACAAAAACTTGACCCCTTTGCCCTATTACTACAAATTC  
AAGCAACAACCCTACGCCTCTAATCATTATTGGCTTGCTATCCACCCTCGTTGGAGG  
ATGAGGTGGTCTCAATCAAACCTCAATTACGTAAAGTCCTCGCCTACTCCTCGATTGC  
CCATCTTGGCTGAATAATACTAATCATTACGTTTTACCCCTCCTCGCCCTCCTTGCC  
CTACTCACGTATTTTCTATGACTTTTTTCAGCATTCTAATCTTTAAAGTAAACAAGGC  
TACCACTGTCAATGCCCTCGCAATCTCATGAACAAAAACCCCTGCCCTCACAGCCTT  
AGCACCCCTAGTCTTATTGTCCCTTGGTGGCCTCCCTCCCCTTACCGGCTTCATACCC  
AAATGATTTATTCTTCAAGAGCTGACTAAGCAAGACCTCCCACCCTTGCTACCCTCG  
CCGCATTAACCTGCCCTCTTAAGCCTTTACTTCTACTTGCGCCTCTCGTACGCGATAAC  
CCTGACAATGTTCCCTAACAACTCGTCGGCGTTACCCCTGACGGTTCTATTCTCCC  
CAATTTACGCTTCCCCTCGCCATGTCCACTGCAGCAACCACCCTTCTTCTCCCACTAG  
CCCCTGCTGCTGTAGCACTACTCATAGCTTATGAGCCTTCTTCTAACCATCATTTCAA  
TCGCCACCCTCCTCTCAACAGTACTTGCCATTGTATCCTTTTGACTCCCCCAAATTAC  
ACCAGACCATGAAAAGCTATCACCATACGAATGCGGCTTTGACCCGATAGGCTCTG  
CCCGACTACCTTTTTTCGCTGCGATTTTTTCTCATCGCCATCCTCTTTCTCCTGTTGAC  
TTAGAGATTGCACTCCTCCTCCCCCTTCCCTGAGGAGACCAATTAGCATCGCCACTA  
CTCACATTCACTTGAGCTACAGCTGTCCTAGCGCTTCTAACCCTTGGCCTCATTTACG  
AATGAATGCAAGGAGGCCTAGAGTGAGCTGAATATGCTAAAAATCCTAATTCCAAC  
ACTTATGCTAATCCCAACAGCCTGGTTACTCAAACCCAGCTGACTCTGGCCCATAAC  
CTTGATGTATAGCTTTTGCATCTCCTTAATTAGCCTTTCATGATTGAAGAACCTCTCA  
GAAACCGGCTGATCATCACTTAACCTCTTTATAGCCACCGACTCCCTATCAACCCCC  
CTCCTCGTTCTCACATGCTGACTGCTACCACTAATGATTTTGGCAAGCCAAAAACAC

ACAGCCTCAGAGCCTCTTGGTCGCCAGCGCATGTACATTACACTTCTCGCCTCCTCC  
AGTTCTTCCTGATTCTAGCATTTAGCGCCACTGAGCTGGTAATGTTTTACGTAATATT  
TGAAGCCACCCTCATCCCCACTCTGATTATTATTACCCGCTGAGGGAACCAAACAGA  
ACGCCTAAATGCAGGGACCTACTTTCTTTTTTACACATTGGCAGGCTCACTACCCCTT  
CTCGTTGCTTTACTTCTTCTCCAGAACACATCCGGCACCCCTGTCGTTGCTAACCCCTAC  
ACTATACAGACCCACTCACTCTCATCTTATGCAGACAAATTATGATGAGCAGGCTGT  
CTCTTAGCATTCCTCGTTAAAATACCTCTCTATGGAGTCCACCTGTGACTCCCTAAAG  
CCCACGTTGAAGCCCCCATTGCAGGCTCAATGATCCTTGCAGCGGTTCTCTTAAAC  
TGGGAGGATATGGCATGATCCGCATAATAACAATATTAGAGCCTCTAACTAAGGAG  
CTAAGCTACCCCTTCATTGTCTTTGCACTTTGGGGGGTAATCATAACTGGCTCAATTT  
GTCTACGACAGACAGACCTTAAGTCCCTAATTGCCTACTCATCTGTAAGTCACATGG  
GCCTAGTGGCCGGGGGAATTCTTATTCAGTCACCCTGGGGCTTAACAGGGGGCCCTTA  
CCCTAATAATTGCACACGGTCTTACCTCATCAGCCCTCTTCTGCCTAGCAAACACAA  
ACTATGAACGAACCCACAGTCGAACGATAGTACTAGCACGAGGGCTTCAAGTAGCT  
CTACCATTGATGGCCACTTGATGATTTATTTCTAGCTTAGCCAACCTAGCCCTTCCAC  
CACTACCTAACCTCATAGGTGAACTAATAATTATTACTTCTCTATTCAACTGATCCTG  
GTGAACTCTAGCATTAACCGGGGCAGGCACTCTAATTACAGCTGGTTACTCCCTTTA  
TATGTTCTTAATAACTCAACGGGGACCTCTCCCAGCACATATCATTGCGCTTGAGCC  
ATCTCACACCCGAGAACACCTCCTTATTGCCTTCATCTTATCCCTTGATTCTCCTCG  
TGCTTAAGCCCGAGCTGATCTGAGGTTGGACTGCCTATGACCCCCACACACTTTGCC  
TTCTCCTCAGCCTTTCTTCTGGGTTTAACAGGCCTGGCATTTCACCGGTTCCACCTCC  
TTCCGCTTTATTATGTCTTGAAGGAATAATACTATCCCTATTTATTGCCCTCTCCCT  
ATGAACACTCCAACTTGACTCAACAACTTTTCAGCATCTCCTATGCTTCTACTTGCA  
TTTTCAGCCTGCGAAGCAAGCGCCGGCCTCGCCCTGCTAGTAGCCACTGCTCGAACC  
CACGGAACCGACCGACTACAAAGCCTAAATCTTCTCCAATGCTAAATGCACCCACC  
TCCCTAATGATTTTCGTCAAGCCTGATCACAATCTTTGCATTGCTAGCCTATCCCCTAG  
TCACCACAATACGACCCACGCCCCAAGAACCTCAGTGGGCTTCTACCCATGTTAAAA  
CAGCTGTAAAAATAGCTTTCTTTGTTAGTCTGTTACCCCTGACCCTATTTCTTAATGA  
GGGTGCCGAGACAATCGTTACTAACTGAACCTGAATAAAATACTAACTCCTTCGACAT  
CAACATTAGCCTAAAATTTGACTTCTACTCAATTATTTTTTACCCCCATTGCCCTCTAC  
GTAACTTGGTCCATCCTAGAATTTGCATTATGATACATGCATGCAGACCCAAACATA  
AACCGCTTCTTCAAGTATCTACTGACATTTCTGATTGCCATAATCGTTCTCGTAACCG  
CAAACAATATGTTTCAACTATTCATCGGTTGAGAGGGTGTGGGGATCATATCGTTCC  
TCCTTATCGGGTGGTGGTTCGGACGGGCGGATGCTAACACTGCAGCACTTCAAGCAG  
TACTTTATAACCGAGTTGGGGACATCGGTCTTATCTTCGCCATGGCTTGAATAGCAG  
CAAACCTAAACTCCTGGGAAATGCAACAAATCTTTGTAACCTCCAAAGACATAGAC  
TTAACTTATCCTCTCCTCGGGCTCATCATCGCAGCAACCGGCAAGTCGGCTCAATTT  
GGTCTTCACCCCTGACTACCTCCGCTATGGAGGGTCTACACCGGTCTCTGCCCTA  
CTTCATTCTAGCACTATAGTCGTTGCCGGCATTTTCTGCTGGTCCGAATGAGCCCCC  
TCCTGGAAAACAACCAAACCTGCCCTCACAACCTGCCTGTGCCTCGGGGGCCCTTACAA  
CACTGTTTACTGCAACCTGTGCCCTCACACAAAATGATATTAAAAAATCGTCGCAT  
TCTCCACATCAAGCCAGCTTGGACTTATGATGGTAACCATCGGACTAAACCAACCAC  
AACTAGCGTTTCTTCACATTTGCACACACGCTTTCTTCAAGGCCATGCTATTTTTATG  
CTCCGGATCTATTATTCATAGTCTTAATGACGAACAAGACATCCGAAAAATAGGAG  
GCATACACCACCTTGCGCCTTTTACATCCTCTTGCCTAACTATTGGCAGTCTTGCCCT  
TACAGGGACCCCTTCTTAGCTGGCTTCTTCTCTAAAGATGCTATCATCGAAGCACT  
AAACACATCCCACCTAAACGCCTGAGCCCTAACTTTAACCCCTCCTAGCCACCTCTTT  
CACAGCAATTTACAGCTTTCGAGTAGTATTTTTTGTGCCCATGGGCCACCCCCGGTTT



AATCCCTCTCCCCCATCAACGAAAATAACCCAGCAGTGATTAACCCACTTAAGCGAT  
TAGCATGAGGAAGCATCGTTGCAGGCTTACTAATTACTTCTAACATTACACCCCTAA  
AAACCCCTGTTATATCTATACCCCTCTCCTTAACTAGCTGCTCTTGCAGTAACAAT  
CCTTGGCCTACTTGTTGCTATGGAACCTCGCCATGCTAACTAATAAGCAATATAAATC  
AATACCCGACACAACGTACACCACTTCTCCACCTTGTTAGGCTTCTTCCCCGGAGTA  
ATGCACCGCCTAGCCCCTAAATTACTTCTTCTCCTAGGCCAAAACGTTGCCAACCAA  
ACAGTAGATCAAACCTGGCTAGAAAAAATCGGCCCCAAAGCCATTGAGTCCTCTAA  
CCGACCCCTGATCTCTTCTACAAGTAACATTCAGCGAGGAGTAATCAAGACATATCT  
CCCCTTTTCTCCTGACACTAGCCCTTATAATCCCCTATTTCATCGCCTAATGACTTT  
TGCTATATATTTAGTTTTATTTTCTCTCGTGTTAGGGTTAGTTGCAGTTGCTTCTAATC  
CATCTCCTTATTTTCGCTGCTTTGGGTTTGGTTGTAGTAGCTGGGATGGGGTGTGGTAT  
ATTAGTTGGGCATGGGGGGCCTTTTTTGTCACTAGTTTTTGTCTTAATTTACTTGGGT  
GGGATGCTAGTTGTATTTGCATACTCCGCAGCGTTAGCTGCTGAGCCGTATCCGGAG  
AGCTGGGGTAGTTGGTCGGTAATGGTTTATGGTAGTTTATACAGGAGGGGTAATGTA  
GTTTCTGGGCTGTTCTGAGGGGGGTGATACGAGTCGTCTTGGGTCCTAGCAGATGAG  
TTGGCGGAGTTCTCCGTGTTTCGGGGGGATATTGGAGGTGTAGCTTTAATATATTCTT  
CTGGGGGGTGGTTATTAATTATTAGTGCGTGGGTATTGCTTTTAACTTTGTTTGTGGT  
TCTCGAGTTGACCGGGGTATAAGTCGAGGGGGCGTTGCGGCAGTT"/>

<sequence id="seq\_Reinhardtius\_hippoglossoides\_AM749133" spec="Sequence"  
taxon="Reinhardtius\_hippoglossoides\_AM749133" totalcount="4"  
value="ATGATACTAAGCTTTTTTGACCAATTTATATCCCCAGTATACCTCGGTATTCC  
GCTAATTGCACTAGCAATTACCCTCCCCTGAATTCTGTTCCCAACCCCTCAAGCCGCT  
GATTAAACAACCGTGTGCTAACACTTCAAGGATGGTTTATTAGCCGCTTCACCTCAC  
AACTTCTTCTTCCCCTAAACCCCGGGGGCCACAAATGAGCAGTTTTATTTACCTCATT  
AATGTTTTTCTTTTCTATTAACATACTAGGACTCCTTCCATATACCTTCACACCAACA  
ACCCAATCTCCCTTAATATGGGCCTCGCAGTTCCCCTCTGATTAGCAACTGTCATTA  
TGGAATGCGAAATCAACCTACACATGCCCTAGGTCACCTCCTTCCAGAAGGCACCCC  
TACTGCTCTCATCCCTGTACTCATCATCATTGAAACAATTAGCCTATTTATTCGACCC  
CTCGCTCTCGGTGTTTCGACTAACAGCGAATCTCACAGCAGGCCACCTCCTTATTCAA  
CTCATTGCAACAGCTGCCTTTGTCCTTCTTCCGCTCATACCTGTTGTTGCTATCTTAA  
CAACGGTGGTCCTCTTCTTCTTACTCTGCTAGAAGTCGCGGTGCGCATGATCCAAG  
CCTATGTCTTTGTTCTACTCTTAAGCCTATATCTACAAGAGAACGTTTAATGCCTCAA  
CTGAACCCCGCACCCCTGATTTGCAATTTTAGTTTTCTTGAATAATCTTTTTAACTG  
TTATTCCCCCAAAGTTTTAGCACATACTTACCCCAATGAACCTACCTCCCAAAGCA  
CACAAAAACAAAACAGAACCCTGAAACTGACCATGATACTAAGTGGCAATCACACG  
TTGATTTTTCTCGACCAATCACAAAGACATCGGCACCCTCTATCTCGTATTTGGTGCC  
TGAGCCGGTATAGTGGGAACAGGCCTAAGTCTGCTTATTCGGGCAGAACTAAGCCA  
ACCTGGGGCTCTCCTTGGAGACGACCAAATTTATAACGTAATCGTCACCGCACACGC  
CTTTGTAATAATCTTTTTTATAGTAATACCCATTATGATCGGGGGTTTCGGAACTGG  
CTTATTCCACTAATAATTGGAGCCCCAGATATGGCTTTCCTCGAATAAATAACATG  
AGTTTCTGACTTCTTCCCCCATCCTTCTTCTCCTCTTAGCCTCTTCAGGTGTTGAAGC  
TGGGGCAGGTACGGGGTGAACCGTTTATCCACCACTAGCTGGTAATCTGGCCCCACGC  
CGGAGCATCCGTTGACCTAACAATCTTCTCACTTCACCTTGCAGGGATTTTCGTCAATT  
CTGGGGGCAATTAACCTTTATTACTACCATCATCAACATGAAACCCACAACAGTTACT  
ATGTACCAAATCCCATTATTTGTTTGGAGCCGTTCTAATTACCGCCGTAATTCTTCTTC  
TGTCCCTTCCCGTCTTAGCCGCAGGGATTACAATGCTACTAACAGACCGCAACCTCA  
ACACAACCTTTTTTGAACCCGCGGAGGTGGTGACCCCATCCTCTATCAACACCTAT  
TCTGATTCTTTGGCCACCCAGAGGTATATATTCTCATTCTTCCAGGCTTCGGAATAAT

TTCCACATTGTTGCATACTATGCAGGTAAAAAAGAACCTTTTGGTTACATAGGAAT  
AGTCTGAGCTATAATAGCCATTGGACTCCTGGGATTCATTGTATGGGCCCATCACAT  
GTTTACAGTCGGGATAGACGTCGACACACGAGCCTACTTTACATCTGCCACAATAAT  
CATTGCAATCCCGACCGGCGTAAAAGTCTTTAGCTGACTCGCAACCCTCCACGGGGG  
AAGCATCAAATGAGAAACGCCACTTCTTTGGGGCCCTCGGCTTTATTTTCTCTTTACA  
GTAGGGGGTCTTACTGGCATTGTCTTGGCTAACTCCTCTCTTGACATTGTTCTGCATG  
ACACATACTATGTAGTAGCCCACTTCCACTATGTACTATCTATGGGTGCTGTATTCGC  
AATCGTTGCCGCCTTCGTCCACTGATTCCCACTATTTACAGGTTATACCCTCCACTCC  
ACATGAACAAAAATCCACTTCGGCCTGATATTTATTGGGGTCAATCTAACATTCTTC  
CCCCAACACTTCCTGGGCCTAGCCGGAATGCCCCGACGATACTCAGACTACCCAGAC  
GCATATACCCTTTGAAACACTGTCTCATCAATCGGATCCCTAATGTCGCTCGTCGCT  
GTAATCTTATTTTTGTTTATTATTTGAGAAGCATTTACAGCCAAACGAGAAGTTGGG  
GCAGTAGAACTTACTGCAACTAACATCGAATGACTTTACGGCTGCCCTCCACCCTAC  
CACACATTTGAAGAGCCCGCATTCGTCCAAGTTTGAATAAACTAAATGGCACATCCC  
TCACAACCTCGGATTTCAAGACGCAGCTTCACCCTTAATAGAAGAACTACTTCACTTC  
CACGATCACGCCTTAATAATTGTAATTCTCATCAGCACGATAGTACTTTATATTATTG  
CGGCTATAGTTACAGCCAACTAACAGATAAACTTGTCTAGATTCTCAAGAAATTG  
AAATTATCTGAACAGTTCTCCAGCTGTTATTCTTATTCTCATCGCCCTACCATCTCT  
CCGAATTTTGTACTTAATAGACGAAATTAATGATCCCCACTTAACAATCAAAGCCAT  
GGGCCACCAGTGGTACTGAAGCTACGAATACACAGACTATGAAGACCTCGGTTTTG  
ACTCTTACATAATCCCTACACAAGACCTGACCCCTGGACAGTTCCGACTACTTGAAG  
CAGATCACCGGATAGTAATCCCGGTAGAATCTCCTATTCGCGTTCTAATCTCAGCTG  
AAGATGTATTACATTCCTGAGCAGTCCCCTCCCTGGGCGTAAAAGTTGACGCCGTAC  
CTGGACGATTAAATCAAGCAACCTTTATTGTTAGCCGGCCAGGCGTATTTTATGGTC  
AATGCTCTGAAATTTGCGGAGCGAACCATAGTTTTATACCCATCGTTGTAGAAGCAG  
TCCCCCTTGAACACTTTGAAAACCTGGTCTTCACTAATAATTGAAGACGCCTATGGCC  
CATCAAGCACACCCATACCACATAGTCGACCCCAGTCCATGACCCCTCACGGGGGCT  
ATTGCTGCCCTATTGATAACATCTGGCCTTGCTATCTGATTTCACTTCCATTCCACAA  
CCCTTATAACTATTGGGACAGTCCTTCTCACCTTAACAATCTTCCAATGATGACGGG  
ACGTCGTACGAGAAGGCACATTTCAAGGACACCACACTCCCCCTGTTCAAATAGGC  
CTCCGATACGGAATAATCTTATTTATTACCTCAGAAGTTCTGTTCTTCTTAGGCTTCT  
TCTGAGCCTTTTACCACTCAAGCCTAGCACCTACTCCAGAACTAGGAGGCTTCTGAC  
CCCCAGCAGGCATTACCCCTTTAGACCCATTTGAAGTCCCGCTTCTTAACACAGCAG  
TCCTCCTTGCTCTGGTGTAACCTGTTACCTGAGCACATCACAGCATTATAGAGGGTA  
AACGGAAACAACTATTCAATCTCTTGCCCTCACAATCTTACTCGGGGGTACTTCA  
CTTTTCTCCAAGGCCTTGAGTATGTCGAAGCCCCCTTACCATTGCAGACGGAGTTT  
ACGGTGCTACATTCTTTGTTGCCACCGGCTTCCACGGCCTCCACGTCTTAATTGGCAC  
CTCATTCTTAGCCGTTTGTCTGTTACGCCAAATCCTTACCATTTTACATCAAACCAC  
CACTTTGGGTTTGAAGCAGCCGCATGATACTGACACTTCGTAGACGTCGTCTGACTT  
TTCCTCTATATCTCTATTTACTGATGAGGATCTTAATGGCCAGTCTACGTAAATCCCA  
CCCTCTTCTAAAAATCGCAAACGATGCTTTAGTTGACCTCCCAGCCCCCTCTAATATC  
TCCGTTTGGTGAAACTTTGGGTCTCTTCTAGGACTCTGTTTAGTAACCCAAATTGCTA  
CCGGCTTGTCTTAGCCATACACTATACATCAGATATTGCTACTGCCTTCACCTCCGT  
GGCTCACATCTGCCGGGACGTCAACTACGGCTGACTTATCCGAAGCATTATGCCAA  
CGGCGCATCATTCTTTTTTCAATTTGCATCTACCTACACATCGGCCGAGGACTCTACTAT  
GGCTCATACCTCTATAAAGAAACATGAACTATTGGAGTCGTCTCTCTCTCTCGTA  
ATAATAACGGCCTTCGTGCGATACGTCTCCCTTGAGGACAAATGTCGTTTTGAGGT  
GCAACCGTTATTACCAACCTCCTATCCGCCGTCCCCTATGTTGGCAACACCCTAGTC

CAATGGATTTGAGGTGGTTTTTCTGTAGACAATGCTACCCTTACCCGGTTCTTTGCCT  
TCCACTTCCTTTTCCCCTTCATCATCGCCGCCGCAACAGTAATTCATCTACTATTTCTT  
CACGAAACTGGCTCAAATAATCCCACCGGCTTAAACTCAGACTCAGACAAGGTTC  
CTTCCACCCTTACTTCACTTACAAAGACCTCTTGGTTTTGCAGTGCTCCTCACTGCAT  
TAGCATCCCTCGCTTTGTTTTACCTAATCTTTTAGGAGACCCAGATAACTTTACCCC  
CGCAAATCCACTTGTTACACCCCCACACATTAAACCAGAGTGATACTTCCTCTTTGC  
TTACGCTATTCTCCGGTCCATCCCAAACAACTTGGAGGCGTTCTTGCCCTTTTATTT  
TCGATCTTAGTTCTCATGCTTGTCCTTTCCTTCACACCTCTAAACAACGCAGCCTAA  
TGTTCCGCCCTCTAACGCAATTTTTGTTCTGGTCTCTGGTAGCAGACGTTATAATTCT  
AACTTGAATTGGAGGAATGCCCCGTAGAACACCCCTTCGTTATCATTGGACAAGTAGC  
ATCACTCCTTTACTTCGCCCTCTTTCTGGTCTGATCCCAACAGCAGGTTTACTAGAG  
AATAAAGTCCTTGGATGAAAATATGATTTCAACTCTCATTACCCATATTATTAACCC  
CCTAACCTTTATTGTACCTGTATTGCTAGCCGTAGCATTCTCACCCTCCTTGAACGA  
AAAGTCCTAGGCTACATACTCCGAAAAGGGCCTAACATCGTAGGGCCTTACGG  
CCTCCTTCAACCCATTGCTGACGGCGTAAAACTCTTTATTAAAGAACCCGTTCCGGCC  
TTCCACCGCATCCCCCGTTCTGTTCTCCTGGCCCCCTATACTCGCACTCACACTGGCC  
CTGACCCTTTGAGCCCCCATGCCTTTCCCGTACCCTGTTGTGGACCTTAACCTGGGTA  
TCCTTTTTATTCTAGCACTATCTAGCCTTGCAGTATACTCTATTCTTGGGTCTGGTTG  
AGCATCCAATTCAAATAACGCTTTAGTAGGAGCACTGCGGGCTGTTGCACAAACAA  
TTTCTTACGAAGTTAGCCTAGGACTCATCCTCCTTAACATCATCATCTTTACCGGAGG  
ATTTACACTTCAGACCTTTAACACGGCCCAAGAGGCCATCTGACTAGTTGTACCCGC  
CTGACCCCTCGCTGCCATATGATACATCTCCACTCTTGCCGAAACAAACCGTGCACC  
CTTCGACCTAACAGAGGGGGAATCTGAACTTGTTTCAGGCTTCAACGTAGAATACGC  
AGGAGGGCCCTTCGCTTTGTTCTTTTTAGCCGAATACTCAAATATCCTCCTAATAAAT  
ACTCTGTCCGCAACATTATTTTTGGGCGCCTCCCACATTCCCTCTATCCCAGAATTAA  
CTAGCATTAAATATTATAACTAAAGCAGCCCTTCTCTCAATTGTTTTTCTGTGAGTCCG  
AGCTTCGTACCCGCGATTCCGTTACGACCAACTTATGCACCTCATTGAAAGAACTT  
TCTTCCACTGACTTTAGCACTAGTTATTTGACACTTAGCGCTCCCTATTGCATTCGCT  
GGTCTCCCACCACAACATAAATGAACCCCTACATCTTGACCCTCTTATATTTGGTT  
TGGGCCTAGGAACAACACTTACGTTTGCAAGCTCACACTGACTCCTCGCTTGAATAG  
GCCTCGAAATTAATACACTAGCCATTATTCCACTAATAGCCCAACATCATCACCCCC  
GAGCAGTCGAAGCTACTACTAAATACTTTCTCGCACAAGCCACAGCAGCCGCTACCC  
TCTTGTTTGCAAGTACCACCAACGCATGACTAACAGGCCAATGAGACATCCAACAA  
ATAACACACCCCCTCCCCACAACAATAATTGTTATTGCCCTAGCACTAAAAATTGGA  
CTAGCACCAATACACTCTTGACTTCCAGAAGTGCTTCAAGGACTAGACCTCACCACC  
GGACTTATCCTCTCGACTTGACAAAACTTGACCCCTTTGCCCTATTACTACAAATTC  
AAGCAACAACCCTACGCCTCTAATCATTATTGGCTTGCTATCCACCCTCGTTGGAGG  
ATGAGGTGGTCTCAATCAAACCTCAATTACGTAAAGTCCTCGCCTACTCCTCGATTGC  
CCATCTTGGCTGAATAATACTAATCATTCAAGTTTTACCCCTCCTCGCCCTCCTTGCC  
CTACTCACGTATTTTCTATGACTTTTTTCAGCATTCTAATCTTTAAAGTAAACAAGGC  
TACCACTGTCAATGCCCTCGCAATCTCATGAACAAAAACCCCTGCCCTCACAGCCCT  
AGCACCCCTAGTCTTATTGTCCCTTGGTGGCCTCCCTCCCCTTACCGGCTTCATACCC  
AAATGATTTATTCTTCAAGAAGTACTAAGCAAGACCTCCCACCCTTGCTACCCTCG  
CCGCATTAAGTCCCTCTTAAGCCTTTACTTCTACTTGCGCCTCTCGTACGCGATAAC  
CCTGACAATGTTCCCTAACAACCTCGTCGGCGTTACCCCTGACGGTTCTATTCTCCC  
CAATTTACGCTTCCCCTCGCCATGTCCACTGCAGCAACCACCCTTCTTCTCCCACTAG  
CCCCTGCTGCTGTAGCACTACTCATAGCTTATGAGCCTTCTTCTAACCATCATTTCAA  
TCGCCACCCTCCTCTCAACAGTACTTGCCATTGTATCCTTTTGACTCCCCCAAATTAC

ACCAGACCATGAAAAGCTATCACCATACGAATGCGGCTTTGACCCGATAGGCTCTG  
CCCGACTACCTTTTTTCGCTGCGATTTTTTCTCATCGCCATCCTCTTTCTCCTGTTGAC  
TTAGAGATTGCACTCCTCCTCCCCCTTCCCTGAGGAGACCAATTAGCATCGCCACTA  
CTCACATTCACTTGAGCTACAGCTGTCCTAGCGCTTCTAACCCTTGGCCTCATTACG  
AATGAATGCAAGGAGGCCTAGAGTGAGCTGAATATGCTAAAAATCCTAATTCCAAC  
ACTTATGCTAATCCCATCAGCCTGGTTACTCAAACCCAGCTGACTCTGGCCCATAAC  
CTTGATGTATAGCTTTTGCATCTCCTTAATTAGCCTTTCATGATTGAAGAACCTCTCA  
GAAACCGGCTGATCATCACTTAACCTCTTTATAGCCACCGACTCCCTATCAACCCCC  
CTCCTCGTTCTCACATGCTGGCTGCTACCACTAATGATTTTGGCAAGCCAAAAACAC  
ACAGCCTCAGAGCCTCTTGGTCGCCAGCGCATGTACATTACACTTCTCGCCTCCTCC  
AGTTCTTCTGATTCTAGCATTTAGCGCCACTGAGCTGGTAATGTTTTACGTAATATT  
TGAAGCCACCCTCATCCCCACTCTGATTATTATTACCCGCTGAGGGAACCAAACAGA  
ACGCCTAAATGCAGGGACCTACTTTCTTTTTTACACATTGGCAGGCTCACTACCCCTT  
CTCGTTGCTTTACTTCTTCTCCAGAACACATCCGGCACCCCTGTCGTTGCTAACCCTAC  
ACTATACAGACCCACTCACTCTCATCTTATGCAGACAAATTATGATGAGCAGGCTGT  
CTCTTAGCATTCCTCGTTAAAATACCTCTCTATGGAGTCCACCTGTGACTCCCTAAAG  
CCCACGTTGAAGCCCCCATTGCAGGCTCAATGATCCTTGCAGCGGTTCTCTTAAAC  
TGGGAGGGTATGGCATGATCCGCATAATAACAATATTAGAGCCTCTAACTAAGGAG  
CTAAGCTACCCCTTCATTGTCTTTGCACTTTGGGGGGTAATCATAACTGGCTCAATTT  
GTCTACGACAGACAGACCTTAAGTCCCTAATTGCCTACTCATCTGTAAGTCACATGG  
GCCTAGTGGCCGGGGGAATTCTTATTCAGTTACCCTGGGGCTTAACAGGGGGCCCTTA  
CCCTAATAAATTGCACACGGTCTTACCTCATCAGCCCTCTTCTGCCTAGCAAACACAA  
ACTATGAACGAACCCACAGTCGAACGATAGTACTAGCACGAGGGCTTCAAGTAGCT  
CTACCATTGATGGCCACTTGATGATTTATTTCTAGCTTAGCCAACCTAGCCCTTCCAC  
CACTACCTAACCTCATAGGTGAACATAATAATTACTTCTCTATTCAACTGATCCTG  
GTGAACCTAGCATTAACCGGGGCAGGCACTCTAATTACAGCTGGTTACTCCCTTA  
TATGTTCTTAATAACTCAACGGGGACCTCTCCCAGCACATATCATTGCGCTTGAGCC  
ATCTCACACCCGAGAACACCTCCTTATTGCCTTCATCTTATCCCCCTTGATTCTCCTCG  
TGCTTAAGCCCGAGCTGATCTGAGGTTGGACTGCCTATGACCCCCACACACTTTGCC  
TTCTCCTCAGCCTTTCTTCTGGGTTTAACAGGCCTGGCATTTCACCGGTTCCACCTCC  
TTTCCGCTTTATTATGTCTTGAAGGAATAATACTATCCCTATTTATTGCCCTCTCCCT  
ATGAACACTCCAACTTGACTCAACAACTTTTCAGCATCTCCTATGCTTCTACTTGCA  
TTTTCAGCCTGCGAAGCAAGCGCCGGCCTCGCCCTGCTAGTAGCCACTGCTCGAACC  
CACGGAACCGACCGACTACAAAGCCTAAATCTTCTCCAATGCTAAATGCACCCACC  
TCCCTAATGATTTTCGTCAAGCCTGATCACAATCTTTGCATTGCTAGCCTATCCCCTAG  
TCACCACAATACGACCCACGCCCCAAGAACCTCAGTGGGCTTCTACCCATGTTAAAA  
CAGCTGTAAAAATAGCTTTCTTTGTTAGTCTGTTACCCCTGACCCTATTTCTTAATGA  
GGGTGCCGAGACAATCGTTACTAACTGAACCTGAATAAATACTAACTCCTTCGACAT  
CAACATTAGCCTAAAATTTGACTTCTACTCAATTATTTTTACCCCCATTGCCCTCTAC  
GTAACCTTGGTCCATCCTAGAATTTGCATTATGATACATGCATGCAGACCCAAACATA  
AACCGCTTCTTCAAGTATCTACTGACATTTCTGATTGCCATAATCGTTCTCGTAACCG  
CAAACAATATGTTTCAACTATTCATCGGTTGAGAGGGTGTGGGGATCATATCGTTCC  
TCCTTATCGGGTGGTGGTTCGGACGGGGCGGATGCTAACACTGCAGCACTTCAAGCAG  
TACTTTATAACCGAGTTGGGGACATCGGTCTTATCTTCGCCATGGCTTGAATAGCAG  
CAAACCTAAACTCCTGGGAAATGCAACAAATCTTTGTAACCTCCAAAGACATAGAC  
TTAACTTATCCTCTCCTCGGGCTCATCATCGCAGCAACCGGCAAGTCGGCTCAATTT  
GGTCTTCACCCCTGACTACCTCCGCTATGGAGGGTCTACACCGGTCTCTGCCCTA  
CTTCATTCTAGCACTATAGTCGTTGCCGGCATTTCCTGCTGGTCCGAATGAGCCCCC

TCCTGGAAAACAACCAAACCTGCCCTCACAAACCTGCCTGTGCCTCGGGGGCCCTTACAA  
CACTGTTTACTGCAACCTGTGCCCTCACACAAAATGATATTAATAAAAAATCGTCGCAT  
TCTCCACATCAAGCCAGCTTGGACTTATGATGGTAACCATCGGACTAAACCAACCAC  
AACTAGCGTTTCTTCACATTTGCACACACGCTTTCTTCAAGGCCATGCTATTTTTATG  
CTCCGGATCTATTATTCATAGTCTTAATGACGAACAAGACATCCGAAAAATAGGAG  
GCATACACCACCTTGCGCCTTTTACATCCTCTTGCCCTAACTATTGGCAGTCTTGCCCT  
TACAGGGACCCCCCTTCTTAGCTGGCTTCTTCTCTAAAGATGCCATCATCGAAGCACT  
AAACACATCCCACCTAAACGCCTGAGCCCTAACTTTAACCCCTCTAGCCACCTCTTT  
CACAGCAATTTACAGCTTTCGAGTAGTATTTTTTTGTGCCCATGGGTCACCCCCGGTTT  
AATCCCTCTCCCCCATCAACGAAAATAAACCAGCAGTGATTAACCCACTTAAGCGAT  
TAGCATGAGGAAGCATCGTTGCAGGCTTACTAATTACTTCTAACATTACACCCCTAA  
AAACCCCTGTTATATCTATACCCCTCTCCTTAAACTAGCTGCTCTTGCAAGTAACAAT  
CCTTGGCCTACTTGTTGCTATGGAACCTCGCCATGCTAACTAATAAGCAACATAAATC  
AATACCCGACACAACGTACACCCTTCTCCACCTTGTTAGGCTTCTTCCCCGGAGTA  
ATGCACCGCCTAGCCCCCTAAATTACTCTTCTTCTAGGCCAAAACGTTGCCAACCAA  
ACAGTAGATCAAACCTGGCTAGAAAAAATCGGCCCAAAGCCATTGAGTCCTCTAA  
CCGACCCCTGATCTCTTCTACAAGTAACATTCAGCGAGGAGTAATCAAGACATATCT  
CCCCTTTTCTCCTGACACTAGCCCTTATAATCCCCTATTTCATCGCCTAATGACTTT  
TGCTATATATTTAGTTTTATTTTCTCTCGTGTTAGGGTTAGTTGCAGTTGCTTCTAATC  
CATCTCCTTATTTGCTGCTTTGGGTTTGGTTGTAGTAGCTGGGATGGGGTGTGGTAT  
ATTAGTTGGGCATGGGGGGCCTTTTTTGTCACTAGTTTTTGTCTTAATTTACTTGGGT  
GGGATGCTAGTTGTATTTGCATACTCCGCAGCGTTAGCTGCTGAGCCGTATCCGGAG  
AGCTGGGGTAGTTGGTCGGTAATGGTTTATGGTAGTTTATACAGGAGGGGTAATGTA  
GTTTCTGGGCTGTTCTGAGGGGGGTGATACGAGTCGTCTTGGGTCCTAGCAGATGAG  
TTGGCGGAGTTCTCCGTGTTTCGGGGGGATATCGGAGGTGTAGCCTTAATATATTCT  
TCTGGGGGGTGGTTATTAATTATTAGTGCGTGGGTATTGCTTTTAACTTTGTTTGTGG  
TTCTCGAGTTGACCGGGGTATAAGTCGAGGGGCGTTGCGGCAGTTT"/>

<sequence id="seq\_Verasper\_moseri\_EF025506" spec="Sequence"

taxon="Verasper\_moseri\_EF025506" totalcount="4"

value="ATGATATTAAGCTTCTTTGACCAATTTATATCCCCAGTATGCCTTGGCATCCC  
ACTAATTGCACTAGCAATTAGCCTACCCTGAATTTTTTTTCCCGGCCCCCCTAAACCGTT  
GATTAACAACCGCGTGCTAACACTTCAAGGCTGATTTATGAGCAACTTCGCCTCAC  
AACTCCTTTTACCCCTAAACCCTGGTGGTCACAAGTGAGCAATTCTATTTACCTCACT  
AATGTTTTTTTTTCTATTAATACTGGGTCTCCTCCCATATACCTTCACACCAACA  
ACTCAACTCTCGCTTAACCTAGGCTTCGCAGTTCCCCTCTGATTAGCAACTGTCATTA  
TGGAATACGTAATCAACCAACACATGCACTGGGACACCTTCTTCCAGAAGGCACCC  
CTACTGCCCTCATTCCTGTACTTATTATCATCGAGACAATTAGCCTATTCATTCGCCC  
CCTCGCTCTCGGTGTTGACTCACAGCAAATCTCACAGCGGGCCACTTACTCATTCA  
ACTCATTGCAACGGCTGCCTTCGTCCTTCTTCCCCTAATAACCGTTGTTGCTATCTTA  
ACAACAGTAGTCCTCTTCTCCTGACTCTACTAGAAATTGCCGTTGCCATGATTCAA  
GCCTATGTCTTCGTCCTACTCCTAAGCCTCTACCTACAAGAAAACGTTTAATGCCTCA  
ACTAAACCCACACCCCTGATTTGCAATTTTAGTTTTCTCTTGAATAATCTTCCTAGTT  
GTAATTCCCCCAAAAATTTTAGCACACGTCTACCCTAATGAACCCACCTCCCAAAGC  
ACACAAAAATAAAACAGAACCCTGAACTGACCATGATATTAAGTGGCAATCACAC  
GATGATTTTTCTCGACCAATCACAAAGACATCGGCACCCTCTATCTCGTATTTGGTG  
CCTGAGCCGGAATAGTGGGGACAGGCCTAAGTCTACTCATTCGAGCAGAACTAAGC  
CAACCCGGGGCTCTCTTGGGGGACGACCAAATTTATAACGTAATCGTCACCGCACAC  
GCCTTTGTAATAATCTTCTTTATAGTTATACCCATTATGATCGGAGGATTGCGGAACT

GACTTATCCCCTTAATAATTGGAGCTCCAGACATGGCCTTCCCTCGAATGAATAACA  
TGAGCTTCTGACTTCTTCCCCCTCATTTCTTCTACTCCTAGCCTCTTCAGGTGTTGAA  
GCTGGGGCAGGAACAGGGTGGACCGTTTATCCTCCACTAGCTGGCAATTTAGCCCAC  
GCCGGGGCCTCCGTAGACCTAACAAATCTTTTCACTTCACCTTGCAGGAATTTTCATCA  
ATTCTGGGAGCAATTAACCTTTATTACTACTATCATCAACATAAAACCTACGACAGTA  
ACTATATACCAAATTCCATTATTTGTCTGAGCCGTAATAATTACAGCCGTTCTACTTC  
TTCTTTCCCTTCCCGTCTTAGCCGCAGGTATTACAATACTACTAACAGACCGAAACCT  
TAACACAACCTTCTTTGACCCCGCCGGAGGGGGTGACCCCATCCTCTATCAACATTT  
ATTCTGATTCTTTGGCCACCCGGAAGTATATATTCTCATTCTTCCAGGTTTCGGAATA  
ATTTCTCACATCGTAGCATACTACTCAGGTAAGAAAGAACCTTTTGGTTATATAGGA  
ATAGTCTGAGCTATGATAGCCATTGGACTCCTCGGATTTATTGTATGGGCCCATCAC  
ATGTTACAGTCGGGATAGATGTAGACACACGAGCCTATTTTACCTCTGCCACAATA  
ATCATTGCGATTCCAACCGGCGTAAAAGTCTTTAGTTGACTCGCAACCCTTCATGGA  
GGAAGCATTAATGAGAAACACCACTTCTTTGGGCTCTGGGCTTTATTTTCCTGTTTA  
CAGTAGGAGGACTTACCGGCATTGTCTTAGCTAATTCCTCTCTTGATATTGTCCTGCA  
TGACACATACTATGTGGTAGCCCACTTCCACTATGTTCTATCTATGGGGGCTGTATTT  
GCAATCGTTGCTGCCTTCGTCCACTGATTCCCATTTTTCAGGCTATACCCTTCACT  
CTACATGAACAAAAATTCACTTCGGCCTGATGTTTATTGGGGTTAATCTAACGTTCTT  
TCCCCAACACTTCCTAGGTCTGGCCGGAATACCTCGACGGTACTCAGACTACCCAGA  
CGCTTACACCCTTTGAAATACTGTCTCATCAATCGGATCTCTAATGTCGCTCCTCGCT  
GTAATTTTATTTTATTTATTATTTGAGAAGCATTTACAGCCAAACGAGAAGTTAGC  
GCAGTAGAACTAACTACAATAATATTGAATGACTTTACGGCTGCCCCCACCTTAC  
CACACATTTGAAGAGCCCGCATTTGTTCAAGTCCGAATAAGCTAAATGGCCCATCCC  
TCACAACTTGGATTCCAAGACGCAGCTTCACCCTTAATAGAAGAACTACTTCACTTC  
CACGATCACGCCTTAATAATTGTAATTCTTATCAGCACGATAGTACTATATATTATTG  
CGGCTATAGTCACAGCGAACTTACAGATAAACTTGTTCTAGACTCCCAAGAAATTG  
AGATCATCTGAACAGTTCTCCCAGCTGTTATTCTTATCCTCATTGCCCTACCATCCGT  
CCGGATTTTATACTTAATAGACGAAATTAATGACCCTCACCTGACAATTAAAGCCTT  
AGGCCATCAGTGGTACTGAAGTTACGAGTATACAGACTACGAAGACCTCGGTTTTG  
ACTCTTACATAATTCCTACACAGGACCTTACCCCGGACAATTCCGACTTCTAGAGG  
CAGACCACCGAATAGTAATCCCCGTGGAATCTCCAATTCGTGTTCTTATTACAGCTG  
AAGATGTCCTGCATTCTGAGCAGTCCCCTCGCTGGGCGTAAAAGTCGACGCCGTGC  
CTGGTTCGGTTAAACCAAGCAACCTTTATTGTCAGCCGACCAGGCGTATACTTCGGAC  
AATGCTCTGAAATCTGCGGGGCAAACCATAGTTTTATGCCCATCGTTGTAGAAGCAG  
TCCCCCTTGAGCACTTCGAAAACCTGGTCTTCCCTAATAATTGAAGATGCCTATGGCC  
CATCAAGCACACCCATACCACATAGTCGACCCCAGCCCATGACCCCTCACGGGGGC  
TATCGCTGCCCTATTGATAACATCTGGCCTTGCTATCTGATTTCACTTCCATTCCACT  
GTTTTAATAACTATCGGAACAATCCTACTTATTTTAAACAATCTTCCAGTGATGGCGA  
GACGTCGTACGAGAGGGGCAGTTTCAAGGACACCACACTCTTCCTGTTCAAAAAGG  
CCTCCGGTATGGTATAATCCTATTTATTACCTCAGAAGTTCTATTCTTCCTAGGCTTC  
TTCTGAGCCTTCTACCACTCGAGCCTAGCACCCACCCCTGAATTAGGAGGCTTTTGA  
CCACCAGCAGGCATTACACCCCTAGACCCATTTGAAGTCCCACTTCTTAATACAGCA  
GTCCTCCTTGCTTCTGGCGTGACTGTTACCTGAGCACATCACAGCATCATAGAGGGT  
AAACGAAAACAAGCTATCCACTCTCTTGCTCTTACAATTTTACTTGGGGGATACTTC  
ACTTTTCTTCAAGCCCTTGAATATCACGAAGCTCCCTTCACTATTGCAGACGGAGTTT  
ACGGTGCTACATTCTTTGTTGCCACTGGCTTCCACGGACTACACGTCTTAATTGGCTC  
ATCATTCTTAGCCGTTTGTGTTGTACGCCAAATCTCCACCATTTTACATCAAACCAC  
CACTTTGGATTTGAAGCAGCCGCATGGTACTGACACTTCGTAGACGTCGTCTGACTC

TTCCTGTACATCTCTATTTACTGATGAGGATCTTAATGGCCAGCCTACGCAAATCCC  
ACCCCTTCTAAAAATCGCAAACGATGCTTTAATTGACCTCCCTGCCCCCTCTAATAT  
CTCTGTTTGATGAACTTTGGGTCTCTTCTGGGACTTTGCCTGGCTACTCAAATTGTG  
ACCGGCTTATTTTTAGCCATACACTATACGTCAGACATTGCTACTGCCTTCACCTCTA  
TTGCACATATCTGCCGGGACGTTAACTACGGTTGGCTTATCCGAAGCATTTCATGCCA  
ATGGCGCATCATTCTTTTTCATTTGTATTTACCTTCATATCGGTCGAGGTCTATATTA  
TGGCTCCTACCTCTATAAAGAAACATGAACTATCGGAGTTGTCCTGCTTCTTCTCGTA  
ATAATGACAGCTTTCGTTGGATACGTTCTCCCTTGGGGACAAATGTCGTTTTGAGGT  
GCAACCGTTATTACCAATCTTCTGTCCGCCATCCCTTATGTCGGTAACACCCTCGTCC  
AATGAATCTGGGGTGGCTTCTCCGTAGACAATGCTACCCTCACCCGGTTCTTTGCCTT  
CCACTTCCTTTTCCCCTTTATTATCGCAGCCGCAACAGTGATCCATCTTCTCTTCCTTC  
ACGAAACTGGCTCAAACAACCCACCGGGTTAAATTCAGATTCTGACAAGGTCCCTT  
TCCACCCTTACTTCACTTACAAGGACCTCTTGGCTTTGCAATCCTTCTTGCTGCACTA  
ACATCCCTTGCCCTGTTTTCCCCAAACCTTTTAGGGGACCCAGACAACCTTTACCCCTG  
CAAATCCACTTGTTACTCCCCACATATCAAGCCAGAATGATACTTCCTTTTTTGCTTA  
CGCTATCCTCCGCTCCATCCCAAACAAGCTTGGAGGCGTACTTGCCCTTTTATTTTCG  
ATTTTAGTCTTAATGCTCGTCCCCCTTCTCCATACCTCTAAACAGCGAAGCCTAATAT  
TCCGCCCTCTAACACAATTCTTATTCTGGTCATTAGTAGCAGACGTTATAATTCTAAC  
TTGAATTGGAGGCATACCTGTAGAACACCCCTTCGTCATCATTGGACAAGTAGCATC  
ACTCCTTTATTTTCGCTCTCTTCCTGGTCCTGATCCCAACAGCAGGTTGACTAGAGAAC  
AAAGTCCTCGGATGAAAATATGATTTCAACTCTCATTACGCATATTATCAACCCACT  
AACCTTTATTGTACCCGTATTGCTGGCCGTAGCATTTCCTTACCCTCCTTGAACGGAAA  
GTACTAGGCTACATACAACCTCCGTAAAGGGCCAAACATCGTAGGACCTTACGGTCTC  
CTCCAACCCATTGCTGACGGCCTAAAACTCTTTATTAAAGAACCCGTTTCGACCTTCA  
ACCGCATCCCCTATCTTGTTCCCTAGCCCCAATGCTCGCACTTACACTAGCCCTTA  
CCCTTTGAGCCCCCATACTTTCCCATACCCCGTCGTAGATCTTAACCTCGGTATTTT  
ATTTATTCTAGCACTGTCTAGCCTTGCAGTGTACTCTATTCTGGGGTCCGGCTGGGCA  
TCCAATTCAAAATATGCCTTAGTGGGAGCACTTCGGGGCCGTTGCACAAACCATTTCC  
TACGAAGTCAGCCTAGGACTCATCTTACTAAATATCATTATCTTTACTGGGGGCTTC  
ACGCTCCAGACCTTTAATACAGCCCAAGAGGCCATCTGACTGGTAGTGCCTGCTTGA  
CCCCTAGCTGCCATATGATACATCTCCACTCTTGCCGAAACAAACCGTGCACCCTTC  
GACCTGACAGAGGGTGAATCCGAACCTTGTTTCAGGCTTCAACGTAGAATACGCAGG  
CGGACCCTTCGCCCTATTCTTTTTAGCCGAATATTCCAACATCCTCCTAATAAATACT  
CTGTCCGCGACACTATTTTTGGGCGCCTCTCACATTCCATCTATCCCCGAATTAACCA  
GCATCAATATTATAACTAAAGCAGCCCTTCTATCAATCGTCTTCCTATGGGTCCGAG  
CTTCCTACCCCCGATTCCGTTATGACCAGCTCATAACCTCATCTGAAAAAACTTCCT  
CCCCCTAACTTTAGCTCTGGTTATTTGACACTTAGCGCTTCCCATCGCACTCGCTGGG  
CTCCCCCACAACCTGTAAATGAACCCCTACATCTTCGCCACCCTTCTATTTGGTTTGG  
GCTTAGGTACAACACTCACGTTTGCAAGCTCACACTGGCTCCTCGCTTGAATGGGCC  
TTGAAATTAATACACTAGCCATCATCCCCCTAATAGCCCAACATCACCACCCACGAG  
CAGTTGAAGCTACTACTAAGTATTTTCTCGCACAAGCCACAGCAGCCGCCACCCTCC  
TGTTTGCGAGTACTACCAACGCTTGACTACCGGCCAATGGGATATTCAACAGATGA  
CACACCCGCTCCCCACAACCTATAATTGTTATTGCCCTAGCACTAAAAATTGGACTAG  
CACCAATACACTCTTGACTTCCAGAGGTTCTTCAAGGACTAGACCTCACCCTGGAC  
TAATCCTCTCGACCTGACAAAACTTGCCCCCTTTACCCTCTTGTTGCAGATTCAAAC  
AACAAATCCTGTACCCCTAATCATTATTGGCTTGCTTTCTACCCTCGTTGGCGGCTGAG  
GTGGCCTTAACCAAACCCAATTACGTAAAATCCTTGCCATATCCTCAATCGCTCACC  
TTGGCTGAATAGTACTGGTTCTTCAATTTTCACCACTCCTCAGTCTCCTCACCTCCT

CACGTACTTTCAATGACTTTTTCAACATTCTGGTCTTCAAAGTAAACAAGGCTACC  
ACTGTCAATACCCTCGCGATCTCGTGAACGAAACTCCCGTCCTCACAGCCCTGGCA  
CCTCTGGTTTTATTATCTCTGGGCGGCCTTCCCCCTCTTACCGGCTTCATACCCAAGT  
GACTTATTCTCCAAGAATTGACTAAGCAAGACCTCCCACACTTGCCACCCTCGCTGC  
ATTAAGTGCCCTCCTGAGTCTTTACTTCTACTTGCGTCTTTCGTACGCAATAACCCTC  
ACAATATCCCCTAACAACCTCATTGGTATTACTCCCTGACGATTCTACTCCCCCAGT  
TTAACTCCCCCTCGCCGTATCCACTGCAGCAGCCACACTTCTCCTCCCACTAGCACC  
AGCTGCCGTGGCACTACTCATCACCTATGAGCCTCCTTCTAACCATCCTTTCAATTGC  
TACTCTCCTCTCAACAGTACTTGCCATTGTATCCTTTTGACTACCCCAAATTATGCCA  
GACCATGAGAAGCTGTCACCATATGAATGCGGCTTTGACCCTATGGGCTCCGCCCGA  
CTACCTTTTTCACTGCGATTTTTTCTCATTGCCATCCTTTTTCTTCTCTTCGACCTAGA  
AATTGCACTCCTCCTCCCCCTCCCCTGAGGGGACCAACTAGCATCACCCCTACTTAC  
ATCACTTGAGCTACAGCTGTCTAGCCCTCCTAACCCTTGGCCTCATTTATGAATGA  
GTACAAGGAGGCTTAGAATGAGCTGAATATGCTAAAAATTCTTATTCCAACACTCAT  
ACTTATTCCAACAGCCTGATTACTTAAACCCAGCCGACTCTGGCCGATTACCTTAAT  
GTATAGCTTTTGCATCTCCTTGCTTAGCCTCTCGTGACTAAAAAACCTCTCAGAAACC  
GGCTGGTCGTCACTCAACCTATTTATGGCCACCGACTCCCTATCAACCCCCCTCCTCG  
TTCTTACATGCTGACTACTACCACTAATAATCTTAGCAAGTCAAAGCACACAACCT  
CAGAACCCCTAAACCGCCAACGCATATACATTACACTTCTTGCTTCCTCCAGTTCTTC  
CTAATTCTAGCATTTAGCGCCACAGAACTAGTGATGTTCTACGTAATATTTGAGGCC  
ACCCTCATCCCCACACTAATCATTATCACCCGCTGGGGAAACCAAACAGAACGCTTA  
AATGCGGGGACCTATTTTCTTCTACACATTAGCAGGCTCACTTCCTCTCCTCGTTG  
CTTTACTCCTGCTTCAAATAACATCCGGCACCTTGCTTTTATTAACCCTCCATTACAC  
AAATCCCCTCGCTCTCATCTTACGCAGACAAATTATGATGAGCAGGCTGTCTTCTAG  
CATTTCTAGTTAAAATACCCCTCTATGGAGTCCACCTCTGACTTCCTAAAGCCCACGT  
TGAAGCCCCAATTGCAGGCTCAATGATCCTTGACGAGTTCCTTCTAAAACTAGGAGG  
ATACGGCATGATCCGAATAATAACAATGCTAGAACCTCTAACTAAGGAACCTAAGCT  
ACCCATTCAATTGTCTTTGCACTTTGAGGGGTTATTATGACCGGCTCAATTTGCCTACG  
ACAAACGGACCTCAAATCCCTGATTGCCTACTCATCTGTAAGCCACATGGGCCTGGT  
GGCTGGAGGCATTCTTATTCAGTCACCCTGAGGCTTAACGGGGGGCCCTTACCCTTAT  
AATCGCACATGGTCTTACCTCATCAGCCCTGTTCTGCCTGGCAAACACAACTATGA  
GCGAACCCATAGCCGGACGATAGTCCTAGCACGAGGCCTTCAAGTAGCTCTACCCCT  
AATAGCCACTTGATGGTTTATTTCTAGCCTAGCCAACCTAGCTCTTCCTCCTCTGCCC  
AATCTTATGGGTGAACTAATAATTATTACTTCCCTATTCAACTGATCCTGATGAACCC  
TAGTACTAACGGGCGGGGGCACCTTAATTACAGCTGGTTATTCCCTTTATATATTCTT  
AATAACCCAACGAGGGCCCTCTCCCGACACATATTATTGCACTTGAACCCTCTCATAC  
CCGAGAACACCTTCTTATTGCCTCCACCTAGTCCCCCTAATTCTGCTCGTTCTTAAGC  
CCGAACCTGATCTGAGGTTGGACTGCCTATGACCCCCACACACTTTGCCTTCTCCTCA  
GCCTTTTTTCTAGGTTTAACAGGCCTGGCATTCCACCGGTTCCACCTCCTCTCCGCC  
TGTTATGCCTTGAAGGAATAATGTTATCCCTGTTTATTGCTCTCTCCCTATGAACACT  
CCAACCTCGACTCAACCAACTTCTCAGCATCTCCTATGCTCCTACTTGCAATTTTCAGCC  
TGTGAGGCAAGCGCCGGCCTCGCCCTACTGGTAGCCACCGCTCGAACCCACGGAAC  
CGACCGACTACAAAGCCTAAATCTTCTCCAATGCTAAATGTACCCTACCTCCCTAAT  
GATTTCTCAAGCCTAATCACAATCTTTGCACTACTGGCTTATCCTCTAGTTACTACG  
ATTCAACCTGCACCTCGAGACCCTCAATGGGCTTCTACCCATGTCAAAACAGCTGTA  
AAAATAGCCTTCTTTGTCAGCCTATTACCCCTGGCCCTCTTTCTCCATGAAGGTGCCG  
AGACAATCATTACTAACTGAACCTGAATAAACACTAATTCCTTCAACATCACTATCA  
GCCTAAAATTTGACTTCTACTCAATTATTTTTACACCCATTGCCCTTTACGTTACTTG



ATCCATTTTAGAATTCGCATCATGGTACATGCACGCAGACCCACAAATGAACCGCTT  
CTTTAAATACCTCCTGACATTTCTGATTGCCATGATTATCCTGGTAACTGCAAACAAC  
ATATTCCAACATTTTATCGGTTGAGAGGGTGTGGGAATTATGTCATTTCTCCTTATCG  
GATGGTGGTTCGGACGGGCAGATGCTAACACCGCAGCGCTTCAAGCAGTACTCTAT  
AACCGTGTGGGAGATATCGGACTTATCTTCGCTATGGCTTGAATAGCAGCAAACCTA  
AACTCCTGGGAAATACAACAAGTCTTTGCAGCCTCTAAGGACATAGACTTAACCTAC  
CCTCTCCTCGGGCTAATTATCGCAGCGACTGGCAAATCAGCCCAGTTTGGACTTCAC  
CCCTGACTACCCTCCGCTATGGAGGGTCCCACACCGGTCTCTGCCCTACTTCACTCTA  
GCACCATAGTCGTTGCCGGCATTTCCTGCTAGTACGAATGAGCCCCCTTTTGAAAA  
ACAACCCAACAGCCCTCACAACCTGCCTCTGCCTCGGAGCCCTCACAACATTATTTA  
CCGCAACCTGTGCCCTCACACAAAATGATATCAAGAAAATCATCGCATTTTCTACAT  
CCAGCCAGCTCGGACTCATAATGGTAACCATCGGACTAAACCAACCGCAACTAGCA  
TTCTGACATTTGCACACACGCCTTCTTCAAAGCCATACTATTCTTGTGCTCCGGAT  
CTATTATCCACAGCCTGAATGACGAACAAGACATTCGAAAAATGGGGGGCATAACAC  
CACCTTGCGCCTTATTCATCCTCCTGCCTAACTATTGGCAGCCTCGCCCTCACAGGGA  
CCCCCTTCTTGGCTGGTTTCTTCTCTAAAGATGCCATTATCGAAGCATTAAACACATC  
CCACCTGAACGCCTGAGCCCTCACCTTAACCCTTCTAGCTACCTCTTTCACAGCAATT  
TACAGCTTTTCGAGTAATATTCTTTGTTCCCATAGGCTACCCCCGATTCACTGCCTTTC  
CCCAATCAACGAAAACAATCCAGCAGTAATCAACCCACTTAAACGACTAGCATGAG  
GGAGCATCATTGCAGGCTTACTTATTACCTCTAACATTACACCCCTAAAAACCCCTA  
TTATGTCTATACCCCTCTCCTTAACTAGCTGCTCTTGCAGTTACAATTGCTGGCCT  
ACTTGTGGCCATAGAACTCGCCATATTAACTAATAAGCAATACAAACCGATACCCG  
GCACAATATTCACCACTTCTCCGCCTTACTAGGCTTCTTCCCCGGAGTTATGCATCGC  
CTAACCCCTGTACTAGTCTTCTTTATAGGCCAAGACGTTGCCAACCACAGTAGAT  
CAAACCTGACTAGAAAAACGGGCCCCAAAGCCATCGAGTCTCTAACAAACCCCT  
GGTCTCTTCTACAAGTAACATCCAACGAGGAGTAATCAAAACATATCTCCCCTCTTC  
CTTCTAACACTAGCCCTTATAATCCCAATATTTATTACCTAATGACTTTTGTATGTA  
CTTAGTTTTATTTTCTTTTGTGTTAGGGTTAGTTGCAGTTGCTTCTAATCCGTCTCCTT  
ATTTTGCTGCTTTGGGTTTGGTTGTGGTAGCTGGTATGGGATGTGGTGTACTAGTTGG  
GCATGGGGGGCCTTTTTATCATTAGTTTTATTCTTAATTTATTTGGGCGGGATGTTA  
GTTGTATTTGCATATTCAGCAGCATTAGCTGCTGAGCCGTACCCGGAGAGCTGGGGT  
AGTTGGTCGGTACTGGTTTATGGTCGTTTACACAGGAGGGGTAATGTAGTCTCAGGG  
TTGTTTTGAGGGGGGTGGTATGAATCGTCTTGGGTTTTAGCAGACGAGCTCGCGGAG  
TTTTCCGTGTTTCGGGGGGATATTGGAGGTGTTGCCTTAATATACTCTTCTGGGGGGT  
GGTTGCTAATCATTAGTGCGTGGGTACTACTCTTAACCCTATTTGTAGTTCTTGAGTT  
AACCGGGGAATAAGTCGAGGAGCGCTGCGGCGGTTA"/>

<sequence id="seq\_Verasper\_moseri\_LC583747" spec="Sequence"

taxon="Verasper\_moseri\_LC583747" totalcount="4"

value="ATGATATTAAGCTTCTTTGACCAATTTATATCCCCAGTATGCCTTGGCATCCC  
ACTAATTGCACTAGCAATTAGCCTACCCTGAATTTTTTTTCCCGGCCCCCAAACCGTT  
GATTAAACAACCGCGTGCTAACACTTCAAGGCTGATTTATGAGCAACTTCGCCTCAC  
AACTCCTTTTACCCCTAAACCCTGGTGGTCACAAGTGAGCAATTCTATTTACCTCACT  
AATGTTTTTTTTTCTATTAATACTGGGTCTCCTCCCATATACCTTCACACCAACA  
ACTCAACTCTCGCTTAACCTAGGCTTCGCAGTTCCCCTCTGATTAGCAACTGTCATTA  
TGGAATACGTAATCAACCAACACATGCACTGGGACACCTTCTTCCAGAAGGCACCC  
CTACTGCCCTCATTCCTGTACTTATTATCATCGAGACAATTAGCCTATTCATTGCCCC  
CCTCGCTCTCGGTGTTTCGACTTACAGCAAATCTCACAGCGGGCCACTTACTCATTCA  
ACTCATTGCAACGGCTGCCTTCGTCTTCTTCCCCTAATACCCGTTGTTGCTATCTTA

ACAACAGTAGTCCTCTTCCTCCTGACTCTACTAGAAATTGCCGTTGCCATGATTCAA  
GCCTATGTCTTCGTCCTACTCCTAAGCCTCTACCTACAAGAAAACGTTTAAATGCCTCA  
ACTAAACCCACACCCCTGATTTGCAATTTTAGTTTTCTCTTGAATAATCTTCCTAGTT  
GTAATTCCCCCAAAAATTTTAGCACACGTCTACCCTAATGAACCCACCTCCCAAAGC  
ACACAAAAATAAAACAGAACCCTGAAACTGACCATGATATTAAGTGGCAATCACAC  
GATGATTTTTCTCGACCAATCACAAGACATCGGCACCCTCTATCTCGTATTTGGTG  
CCTGAGCCGGAATAGTGGGGACAGGCCTAAGTCTACTCATTCGAGCAGAACTAAGC  
CAACCCGGGGCTCTCTTGGGGGACGACCAAATTTATAACGTAATCGTCACCGCACAC  
GCCTTTGTAATAATCTTCTTTATAGTTATACCCATTATGATCGGAGGATTCGGGAACT  
GACTTATCCCCTTAATAATTGGAGCTCCAGACATGGCCTTCCCTCGAATGAATAACA  
TGAGCTTCTGACTTCTTCCCCCTCATTCTTCTACTCCTAGCCTCTTCAGGTGTTGAA  
GCTGGGGCAGGAACAGGGTGGACCGTTTATCCTCCACTAGCTGGCAATTTAGCCCAC  
GCCGGGGCCTCCGTAGACCTAACAATCTTTTCACTTCACCTTGCAGGAATTTTCATCA  
ATTCTGGGAGCAATTAACCTTTATTACTACTATCATCAACATAAAACCTACGACAGTA  
ACTATATACCAAATTCCATTATTTGTCTGAGCCGTACTAATTACAGCCGTTCTACTTC  
TTCTTTCCCTTCCCGTCTTAGCCGCAGGTATTACAATACTACTAACAGACCGAAACCT  
TAACACAACCTTCTTTGACCCCGCCGGAGGGGGTGACCCCATCCTCTATCAACATTT  
ATTCTGATTCTTTGGCCACCCGGAAGTATATATTCTCATTCTTCCAGGTTTCGGAATA  
ATTTCTCACATCGTAGCATACTACTCAGGTAAGAAAGAACCTTTTGGTTATATAGGA  
ATAGTCTGAGCTATGATAGCCATTGGACTCCTCGGATTTATTGTATGGGCCCATCAC  
ATGTTACAGTCGGGATAGATGTAGACACACGAGCCTATTTTACCTCTGCCACAATA  
ATCATTGCGATTCCAACCGGCGTAAAAGTCTTTAGTTGACTCGCAACCCTTCATGGA  
GGAAGCATTAATGAGAAACACCCTTCTTTGGGCTCTGGGCTTTATTTTCCTGTTTA  
CAGTAGGAGGACTTACCGGCATTGTCTTAGCTAATTCCTCTCTTGATATTGTCCTGCA  
TGACACATACTATGTGGTAGCCACTTCCACTATGTTCTATCTATGGGGGCTGTATTT  
GCAATCGTTGCTGCCTTCGTCCACTGATTCCCATTATTTTCAGGCTATACCCTTCACT  
CTACATGAACAAAAATTCCTTCGGCCTGATGTTTATCGGGGTAAATCTAACGTTCT  
TTCCCCAACACTTCCTAGGTCTGGCCGGAATACCTCGACGGTACTCAGACTACCCAG  
ACGCTTACACCCTTTGAAATACTGTCTCATCAATCGGATCTCTAATGTCGCTCCTCGC  
TGTAATTTTATTTTATTTATTATTGAGAAGCATTTACAGCCAAACGAGAAGTTAGC  
GCAGTAGAACTAACTACAATAATATTGAATGACTTTACGGCTGCCCCCACCTTAC  
CACACATTTGAAGAGCCCGCATTTGTTCAAGTCCGAATAAGCTAAATGGCCCATCCC  
TCACAACCTTGGATTCCAAGACGCAGCTTCACCCTTAATAGAAGAACTACTTCACTTC  
CACGATCACGCCTTAATAATTGTAATTCTTATCAGCACGATAGTACTATATATTATTG  
CGGCTATAGTCACAGCGAACTTACAGATAAACTTGTTCTAGACTCCCAAGAAATTG  
AGATCATCTGAACAGTTCTCCCAGCTGTTATTCTTATCCTCATTGCCCTACCATCCGT  
CCGGATTTTATACTTAATAGACGAAATTAATGACCCTCACCTGACAATTAAAGCCTT  
AGGCCATCAGTGGTACTGAAGTTACGAGTATACAGACTACGAAGACCTCGGTTTTG  
ACTCTTACATAATTCCTACACAGGACCTTACCCCGGACAATTCCGACTTCTAGAGG  
CAGACCACCGAATAGTAATCCCCGTGGAATCTCCAATTCGTGTTCTTATTACAGCTG  
AAGATGTCCTGCATTCTGAGCAGTCCCCTCGCTGGGCGTAAAAGTCGACGCCGTGC  
CTGGTCGGTTAAACCAAGCAACCTTTATTGTCAGCCGACCAGGCGTATACTTCGGAC  
AATGCTCTGAAATCTGCGGGGCAAACCATAGTTTTATGCCCATCGTTGTAGAAGCAG  
TCCCCCTTGAGCACTTCGAAAACCTGGTCTTCCCTAATAATTGAAGATGCCTATGGCC  
CATCAAGCACACCCATACCACATAGTCGACCCCAGCCCATGACCCTCACGGGGGC  
TATCGCTGCCCTATTGATAACATCTGGCCTTGCTATCTGATTTCACTTCCATTCCACT  
GTTTTAATAACTATCGGAACAATCCTACTTATTTTAAACAATCTTCCAGTGATGGCGA  
GACGTCGTACGAGAGGGCACATTTCAAGGACACCACACTCTTCCTGTTCAAAAAGG

CCTCCGGTATGGTATAATCCTATTTATTACCTCAGAAGTTCTATTCTTCCTAGGCTTC  
TTCTGAGCCTTCTACCACTCGAGCCTAGCACCCACCCCTGAATTAGGAGGCTTTTGA  
CCACCAGCAGGCATTACACCCCTAGACCCATTTGAAGTCCCCTTCTTAATACAGCA  
GTCCTCCTTGCTTCTGGCGTGTCTGTTACCTGATCACATCACAGCATCATAGAGTGTA  
AACGAAAACAAGCTATCCACTCTCTTGCCCTTACAATTTTACTTGGGGGATACTTCA  
CTTTTCTTCAGGCTCTTGAATATCACGAAGCTCCCTTCACTATTGCTGACGGAGTTTA  
CGGTGCTACATTCTTTGTTGCCACTGGCTTCCACGGACTACACGTCTTAATTGGCTCA  
TCATTCTTAGCCGTTTGTGTTACGCCAAATTCTCCACCATTTTACATCAAACCACC  
ACTTTGGATTTGAAGCAGCCGCATGGTACTGACACTTCGTAGACGTCGTCTGACTCT  
TCCTGTACATCTCTATTTACTGATGAGGATCTTAATGGCCAGCCTACGCAAATCCCA  
CCCCCTTCTAAAAATCGCAAACGATGCTTTAATTGACCTCCCTGCCCCCTCTAATATC  
TCTGTTTGATGAACTTTGGGTCTCTTCTGGGACTTTGCCTGGCTACTCAAATTGTGA  
CCGGCTTATTTTTAGCCATACACTATACGTCAGACATTGCTACTGCCTTCACCTCTAT  
TGCACATATCTGCCGGGACGTTAACTACGGTTGGCTTATCCGAAGCATTTCATGCCAA  
TGGCGCATCATTCTTTTTTCAATTTGTATTTACCTTCATATCGGTTCGAGGTCTATATTAT  
GGCTCCTACCTCTATAAAGAAACATGAACTATCGGAGTTGTCCTGCTTCTTCTCGTA  
ATAATGACAGCTTTCGTTGGATACGTTCTCCCTTGGGGACAAATGTCGTTTTGAGGT  
GCAACCGTTATTACCAATCTTCTGTCCGCCATCCCTTATGTCGGTAACACCCTCGTCC  
AATGAATCTGGGGTGGCTTCTCCGTAGACAATGCTACCCTCACCCGGTTCTTTGCCTT  
CCACTTCCTTTTCCCCTTTATTATCGCAGCCGCAACAGTGATCCATCTTCTCTTCCTTC  
ACGAAACTGGCTCAAACAACCCACCGGGTTAAATTCAGATTCTGACAAGGTCCCTT  
TCCACCCTTACTTCACTTACAAGGACCTCTTGGCTTTGCAATCCTTCTTGCTGCACTA  
ACATCCCTTGGCCTGTTTTCCCCAAACCTTTTAGGGGACCCAGACAACCTTTACCCCTG  
CAAATCCACTTGTTACTCCCCCACATATCAAGCCAGAATGATACTTCCTTTTTTGCTTA  
CGCTATCCTCCGCTCCATCCCAAACAAGCTTGGAGGCGTACTTGCCCTTTTATTTTCG  
ATTTTAGTCCTAATGCTCGTCCCCCTTCTCCATACCTCTAAACAGCGAAGCCTAATAT  
TCCGCCCTCTAACACAATTCTTATTCTGGTCACTAGTAGCAGACGTTATAATTCTAAC  
TTGAATTGGAGGCATACCTGTAGAACACCCCTTCGTCATCATTGGACAAGTAGCATC  
ACTCCTTTATTTTCGCTCTCTTCCTGGTCCTGATCCCAACAGCAGGTTGACTAGAGAAC  
AAAGTCCTCGGATGAAAATATGATTTCAACTCTCATTACGCATATTATCAACCCACT  
AACCTTTATTGTACCCGTATTGCTGGCCGTAGCATTCCTTACCCTCCTTGAACGGAAA  
GTACTAGGCTACATACAACCTCCGTAAAGGGCCAAACATCGTAGGACCTTACGGTCTC  
CTCCAACCCATTGCTGACGGCCTAAACTCTTTATTAAAGAACCCGTTTCGACCTTCA  
ACCGCATCCCCCATCTTGTTCCCTCCTAGCCCCAATGCTCGCACTTACACTAGCCCTTA  
CCCTTTGAGCCCCCATACCTTTCCCATACCCCGTCGTAGATCTTAACCTCGGTATTTT  
ATTTATTCTAGCACTGTCTAGCCTTGCAGTGTACTCTATTCTGGGGTCCGGCTGGGCA  
TCCAATTCAAAATATGCCTTAGTGGGAGCACTTCGGGCGGTTGCACAAACCATTTCC  
TACGAAGTCAGCCTAGGACTCATCTTACTAAATATCATTATCTTTACTGGGGGGCTTC  
ACGCTCCAGACCTTTAATACAGCCCAAGAGGCCATCTGACTGGTAGTGCCTGCTTGA  
CCCCTAGCTGCCATATGATACATCTCCACTCTTGCCGAAACAAACCGTGCACCCTTC  
GACCTGACAGAGGGTGAATCCGAACCTTGTTTCAGGCTTCAACGTAGAATACGCAGG  
CGGACCCTTCGCCCTATTCTTTTTAGCCGAATATTCCAACATCCTCCTAATAAATACT  
CTGTCCGCGACACTATTTTTGGGGCGCCTCTCACATTCCATCTATCCCCGAATTAACCA  
GCATCAATATTATAACTAAAGCAGCCCTTCTATCAATCGTCTTCCTATGGGTCCGAG  
CTTCCTACCCCCGATTCCGTTATGACCAGCTCATACACCTCATCTGAAAAAACTTCCT  
CCCCCTAACTTTAGCTCTGGTTATTTGACACTTAGCGCTTCCCATCGCACTCGCTGGG  
CTCCCCCCCACAACGTAAATGAACCCCTACATCTTCGCCACCCTTCTATTTGGTTTGG  
GCTTAGGTACAACACTCACGTTTGCAAGCTCACACTGGCTCCTCGCTTGAATGGGCC

TTGAAATTAATACACTAGCCATCATCCCCCTAATAGCCCAACATCACCACCCACGAG  
CAGTTGAAGCTACTACTAAGTATTTTCTCGCACAAGCCACAGCAGCCGCCACCCTCC  
TGTTTGCGAGTACTACCAACGCTTGACTCACCGGCCAATGGGATATTCAACAGATGA  
CACACCCGCTCCCCACAACATAATTGTTATTGCCCTAGCACTAAAAATTGGACTAG  
CACCAATACACTCTTGACTTCCAGAGGTTCTTCAAGGACTAGACCTCACCCTGGAC  
TAATCCTCTCGACCTGACAAAACTTGCCCCCTTTGCCCTCTTGTTGCAGATTCAAAC  
AACAAATCCTGTGCCCCTAATCATTATTGGCTTGCTTTCTACCCTCGTTGGCGGCTGAG  
GTGGCCTTAACCAAACCCAATTACGTAAAATCCTTGCCTATTCCTCAATCGCTCACC  
TTGGCTGAATAGTACTGGTTCTTCAATTTTCACCCTCCTCAGTCTCCTCACCCTCCT  
CACGTACTTTCAATGACTTTTTCAACATTCTTGGTCTTCAAAGTAAACAAGGCTACC  
ACTGTCAATACCCTCGCGATCTCGTGAACGAAAACCTCCCGTCCTCACAGCCCTGGCA  
CCTCTGGTTTTATTATCTCTGGGCGGCCTTCCCCCTCTTACCGGCTTCATACCCAAGT  
GACTTATTCTCCAAGAATTGACTAAGCAAGACCTCCCACACTTGCCACCCTCGCTGC  
ATTAAGTGCCCTCCTGAGTCTTTACTTCTACTTGCCTCTCTCGTACGCAATAACCCTC  
ACAATATCCCCTAACAACCTCATTGGTATTACTCCCTGACGATTCTACTCCCCCAGT  
TTACACTCCCCCTCGCCGTATCCACTGCAGCAGCCACACTTCTCCTCCCCTAGCACC  
AGCTGCCGTGGCACTACTCATCACCTATGAGCCTCCTTCTAACCATCCTTTCAATTGC  
TACTCTCCTCTCAACAGTACTTGCCATTGTATCCTTTTGACTACCCCAAATTATGCCA  
GACCATGAGAAGCTGTCACCATATGAATGCGGCTTTGACCCTATGGGCTCCGCCCGA  
CTACCTTTTTTCACTGCGATTTTTTCTCATTGCCATCCTTTTTTCTTCTTCGACCTAGA  
AATTGCACTCCTCCTCCCCCTCCCCTGAGGGGACCAACTAGCATCACCCCTACTTAC  
ATTCATTGAGCTACAGCTGTCTAGCCCTCCTAACCCTTGGCCTCATTTATGAATGA  
GTACAAGGAGGCTTAGAATGAGCTGAATATGCTAAAAATTCTTATTCCAACACTCAT  
ACTTATTCCAACAGCCTGATTACTTAAACCCAGCCGACTCTGGCCGATTACCTTAAT  
GTATAGCTTTTGCATCTCCTTGCTTAGCCTCTCGTGACTAAAAAACCTCTCAGAAACC  
GGCTGGTCGTCACTCAACCTATTTATGGCCACCGACTCCCTATCAACCCCCCTCCTCG  
TTCTTACATGCTGACTACTACCACTAATAATCTTAGCAAGTCAAAAGCACACAACCT  
CAGAACCCCTAAACCGCCAACGCATATACATTACACTTCTTGCTTCCTCCAGTTCTTC  
CTAATTCTAGCATTTAGCGCCACAGAACTAGTGATGTTCTACGTAATATTTGAGGCC  
ACCCTCATCCCCACACTAATCATTATCACCCGCTGGGGGAACCAAACAGAACGCTTA  
AATGCGGGGACCTATTTTCTCTTCTACACATTAGCAGGCTCACTTCCTCTCCTCGTTG  
CTTTACTCCTGCTTCAAAATACATCCGGCACCTTGCTTTTATTAACCCTCCATTACAC  
AAATCCCCTCGCTCTCATCTTACGCAGACAAATTATGATGAGCAGGCTGTCTTCTAG  
CATTTCTAGTTAAAATACCCCTCTATGGAGTCCACCTCTGACTTCCTAAAGCCCACGT  
TGAAGCCCCAATTGCAGGCTCAATGATCCTTGCAGCAGTTCTTCTAAAACTAGGAGG  
ATACGGCATGATCCGAATAATAACAATGCTAGAACCTCTAACTAAGGAACCTAAGCT  
ACCCATTCAATTGTCTTTGCACTTTGAGGGGTTATTATGACCGGCTCAATTTGCCTACG  
ACAAACGGACCTCAAATCCCTGATTGCCTACTCATCTGTAAGCCACATGGGCCTGGT  
GGCTGGAGGCATTCTTATTCAAGTACCCTGAGGCTTAACGGGGGGCCCTTACCCTTAT  
AATCGCACATGGTCTTACCTCATCAGCCCTGTTCTGCCTGGCAAACACAACTATGA  
GCGAACCATAGCCGGACGATAGTCCTAGCACGAGGCCTTCAAGTAGCTCTACCCCT  
AATAGCCACTTGATGGTTTATTTCTAGCCTAGCCAACCTAGCTCTTCCTCCTCTGCC  
AATCTTATGGGTGAACTAATAATTATTACTTCCCTATTCAACTGATCCTGATGAACCC  
TAGTACTAACGGGCGGGGGCACTTTAATTACAGCTGGTTATTCCTTTATATATTCTT  
AATAACCCAACGAGGCCCTCTCCCGACACATATTATTGCACTTGAACCCTCTCATAC  
CCGAGAACACCTTCTTATTGCCTCCACCTAGTCCCCCTAATTCTGCTCGTTCTTAAGC  
CCGAACCTGATCTGAGGTTGGACTGCCTATGACCCCCACACACTTTGCCTTCTCCTCA  
GCCTTTTTTCTAGGTTTAACAGGCCTGGCATTCCACCGGTTCCACCTCCTCTCGCCC

TGTTATGCCTTGAAGGAATAATGTTATCCCTGTTTATTGCTCTCTCCCTATGAACACT  
CCAACCTCGACTCAACCAACTTCTCAGCATCTCCTATGCTCCTACTTGCATTTTCAGCC  
TGTGAGGCAAGCGCCGGCCTCGCCCTACTGGTAGCCACCGCTCGAACCCACGGAAC  
CGACCGACTACAAAGCCTAAATCTTCTCCAATGCTAAATGTACCCTACCTCCCTAAT  
GATTTCTCTCAAGCCTAATCACAATCTTTGCACTACTGGCTTATCCTCTAGTTACTACG  
ATTCAACCTGCACCTCGAGACCCTCAATGGGCTTCTACCCATGTCAAAACAGCTGTA  
AAAATAGCCTTCTTTGTCAGCCTATTACCCCTGGCCCTCTTTCTCCATGAAGGTGCCG  
AGACAATCATTACTAACTGAACCTGAATAAACACTAATTCCTTCAACATCACTATCA  
GCCTAAAATTTGACTTCTACTCAATTATTTTTACACCCATTGCCCTTTACGTTACTTG  
ATCCATTTTAGAATTCGCATCATGGTACATGCACGCAGACCCACAAATGAACCGCTT  
CTTTAAATACCTCCTGACATTTCTGATTGCCATGATTATCCTGGTAACTGCAAACAAC  
ATATTCCAACCTATTTATCGGTTGAGAGGGTGTGGGAATTATGTCATTTCTCCTTATCG  
GATGGTGGTTCGGACGGGCAGATGCTAACACCGCAGCGCTTCAAGCAGTACTCTAT  
AACCGTGTGGGAGATATCGGACTTATCTTCGCTATGGCTTGAATAGCAGCAAACCTA  
AACTCCTGGGAAATACAACAAGTCTTTGCAGCCTCTAAGGACATAGACTTAACCTAC  
CCTCTCCTCGGGCTAATTATCGCAGCGACTGGCAAATCAGCCCAGTTTGGACTTCAC  
CCCTGACTACCTCCGCTATGGAGGGTCCCACACCGGTCTCTGCCCTACTTCACTCTA  
GCACCATAGTCGTTGCCGGCATTTCCTGCTAGTACGAATGAGCCCCCTTTTGGA  
ACAACCCAACAGCCCTCACAACCTTGCTCTGCCTCGGAGCCCTCACAACATTATTTA  
CCGCAACCTGTGCCCTCACACAAAATGATATCAAGAAAATCATCGCATTTTCTACAT  
CCAGCCAGCTCGGACTCATAATGGTAACCATCGGACTAAACCAACCGCAACTAGCA  
TTCCTGCACATTTGCACACACGCCTTCTTCAAAGCCATACTATTCTTGTGCTCCGGAT  
CTATTATCCACAGCCTGAATGACGAACAAGACATTCGAAAAATGGGGGGCATAAC  
CACCTTGCGCCTTATTCATCCTCCTGCCTAACTATTGGCAGCCTCGCCCTCACAGGGA  
CCCCCTTCTTGGCTGGTTTCTTCTCTAAAGATGCCATTATCGAAGCATTAAACACATC  
CCACCTGAACGCCTGAGCCCTCACCTTAACCCTTCTAGCTACCTCTTTCACAGCAATT  
TACAGCTTTTCGAGTAATATTCTTTGTTCCCATAGGCTACCCCCGATTCACTGCCTTTC  
CCCAATCAACGAAAACAATCCAGCAGTAATCAACCCACTTAAACGACTAGCACGAG  
GGAGCATCATTGCAGGCTTACTTATTACCTCTAACATTACACCCCTAAAAACCCCTA  
TTATGTCTATACCCCTCTCCTTAAACTAGCTGCTCTTGCAGTTACAATTGCTGGCCT  
ACTTGTGGCCATAGAACTCGCCATATTAATAAAGCAATACAAACCGATACCCG  
GCACAATATTCACCACTTCTCCGCCTTACTAGGCTTCTTCCCCGGAGTTATGCATCGC  
CTAACCCCTGTACTAGTCTTCTTTATAGGCCAAGACGTTGCCAACCACAGTAGAT  
CAAACCTGACTAGAAAAACGGGCCCCAAAGCCATCGAGTCCTCTAACAAACCCCT  
GGTCTCTTCTACAAGTAACATCCAACGAGGAGTAATCAAAACATATCTCCCCTCTTC  
CTTCTAACACTAGCCCTTATAATCCCAATATTTATTACCTAATGACTTTTGTATGTA  
CTTAGTTTTATTTCTTTTGTGTTAGGGTTAGTTGCAGTTGCTTCTAATCCGTCTCCTT  
ATTTTGCTGCTTTGGGTTTGGTTGTGGTAGCTGGTATGGGATGTGGTGTACTAGTTGG  
GCATGGGGGGCCTTTTTTATCATTAGTTTTATTCTTAATTTATTTGGGCGGGATGTTA  
GTTGTATTTGCATATTCAGCAGCATTAGCTGCTGAGCCGTACCCGGAGAGCTGGGGT  
AGTTGGTCGGTACTGGTTTATGGTCGTTTACACAGGAGGGGTAATGTAGTCTCAGGG  
TTGTTTTGAGGGGGGTGGTATGAATCGTCTTGGGTTTTAGCAGACGAGCTCGCGGAG  
TTTTCCGTGTTTCGGGGGGATATTGGAGGTGTTGCCTTAATATACTCTTCTGGGGGGT  
GGTTGCTAATCATTAGTGCCTGGGTACTACTCTTAACCCTATTTGTAGTTCTTGAGTT  
AACCGGGGAATAAGTCGAGGAGCGCTGCGGCGGTTA"/>

<sequence id="seq\_Verasper\_variegatus\_DQ403797" spec="Sequence"  
taxon="Verasper\_variegatus\_DQ403797" totalcount="4"  
value="ATGGTATTAAGCTTCTTTGACCAATTTATATCCCCAGTATGCCTTGGCATCCC

ACTAATTGCACTAGCAATTAGCCTGCCCTGAATTTTTTTTCCCAGCCCCAAAAACCGT  
TGATTAAACAACCGCCTGTAAACCCTTCAAGGCTGATTTATGAGCAACTTCACCTCA  
CAACTCCTTTTACCCCTAAACCCCGGTGGTCACAAGTGAGCAATTCTGTTTACCTCA  
CTAATGTTTTTTTCTTCTATCAATATACTGGGTCTCCTTCCATACACCTTTACACCAA  
CAACTCAACTCTCCCTAAACCTAGGCTTCGCAGTGCCCTCTGATTAGCAACTGTCA  
TTATGGGATACGCAATCAACCAACACATGCACTAGGACACCTTCTTCCAGAAGGTAC  
GCCCCGCTGCCCTCATTCCCGTACTTATTATTATCGAAACAATTAGCCTATTCATTTCGC  
CCCCCTCGCTCTCGGTGTTGACTTACAGCAAATCTCACGGCAGGCCACTTACTCATT  
CAACTCATTGCAACAGCTGCCTTTGTCCTTCTTCCCCTAATACCCGTTGTTGCTGTCC  
TAACAACAGTAGTCCTCTTCTCCTGACTCTGCTAGAAATCGCCGTTGCCATGATTC  
AAGCCTATGTCTTCGTCTACTCCTAAGCCTTTACCTACAAGAAAACGTTTAATGCCT  
CAACTGAACCCCGCACCCCTGATTTGCAATTTTAGTTTTCTCTTGAATAATCTTCCTAG  
TTGTAATCCCCCCTAAAATTTTAGCACACATCTACCCTAATGAGCCCACCTCCCAAA  
GCACACAAAAATAAAACAGAATCCTGAAACTGACCATGGTATTAAGTGGCAATCAC  
ACGTTGATTTTTTCTCGACCAATCACAAAGACATCGGCACCCTCTATCTCGTATTTGGT  
GCCTGAGCCGGAATAGTGGGGACAGGCCTTAGTCTACTTATTCGAGCAGAACTAAG  
CCAACCCGGGGCTCTCTTGGGGGACGACCAGATTTATAACGTAATCGTCACCGCACA  
CGCCTTTGTAATAATCTTCTTTATAGTTATACCCATTATGATCGGAGGATTCGGAAAC  
TGACTTATTCCATTAATAATTGGAGCCCCAGACATGGCCTTCCCTCGAATGAATAAC  
ATGAGCTTCTGACTTCTTCCCCCCTCATTTCTTCTACTCCTAGCCTCTTCAGGTGTTGA  
AGCTGGGGCAGGAACAGGGTGAACCGTTTATCCTCCACTAGCTGGCAATTTAGCCC  
ACGCCGGGGCCTCCGTAGACCTAACAATCTTTTCACTTCACCTTGCAGGAATTTTCAT  
CAATTCTGGGAGCAATTAACCTTTATTACTACTATCATCAACATAAAACCTACGACAG  
TAACTATGTACCAAATCCCGTTATTTGTCTGAGCCGTACTAATTACAGCCGTCCTACT  
TCTTCTTTCCCTTCCCGTCTTAGCCGCAGGAATTACAATGCTACTGACGGACCGAAA  
CCTTAACACGACCTTCTTTGACCCTGCCGGAGGGGGTGACCCTATCCTCTATCAACA  
TTTATTCTGATTCTTTGGTCACCCGGAAGTATATATCCTCATTCTTCCAGGTTTCGGA  
ATAATTTCTCACATCGTAGCATACTATTCAGGTAAGAAAGAACCTTTTGGTTATATG  
GGGATGGTGTGAGCTATAATGGCCATCGGACTCCTCGGATTTATCGTATGGGCCCAT  
CACATGTTACAGTCGGTATAGATGTAGACACACGAGCCTATTTTACCTCTGCCACA  
ATAATTATTGCGATTCCAACCGGCGTAAAAGTCTTTAGTTGGCTCGCAACCCTTCAT  
GGGGGAAGCATTAAATGAGAGACACCCTTCTTTGGGCGCTGGGCTTTATTTTCCTG  
TTTACAGTAGGAGGACTAACCGGCATTGTCTTAGCTAATTCTTCTCTTGATATTGTCC  
TACATGATACATACTATGTAGTAGCTCACTTCCACTATGTTCTATCCATAGGAGCTGT  
ATTTGCAATCGTTGCTGCCTTCGTCCACTGATTCCCATTATTTTTCGGGCTATACCCTT  
CACTCTACATGAACAAAAATTCACTTCGGCCTGATGTTTATTGGGGTCAATCTAACA  
TTCTTCCCCCAACACTTCCTAGGTCTGGCCGGAATACCTCGACGGTACTCAGACTAC  
CCAGACGCTTACACCCTTTGAAATACTGTCTCATCAATTGGATCCCTAATGTCGCTTA  
TCGCTGTAATTTTATTTTATTTTATTATTTGAGAAGCATTTACAGCCAAACGAGAAGT  
TAGCGCAGTAGAACTAACTTCAACTAATATTGAATGACTCTACGGCTGCCCCCACC  
TTATCACACATTTGAAGAACCCGCATTTGTTCAAGTTCGAATTAATAATGGCTCA  
TCCCTCACAACCTCGGATTTCAAGACGCAGCTTCACCCTTAATAGAAGAACTACTTCA  
CTTCCACGACCACGCCTTAATAGTTGTTATTCTTATTAGCACGATAGTACTATATATT  
ATTGCCGCTATAGTCACAGCGGAACCTTACAGATAAACTTGTTCTAGACTCCCAAGAA  
ATTGAAATCATCTGAACAGTTCTCCAGCTGTGATTCTCATTCTTATTGCCCTACCAT  
CCCTCCGAATTTTATACTTGATAGACGAAATTAATGACCCTCACTTGACAATTAAG  
CCATCGGCCATCAATGATACTGAAGTTACGAGTACACAGACTACGAAGACCTCGGT  
TTTGACTCTTACATAATTCCTACACAGGACCTTACTCCCGGGCAATTCGACTTCTAG

AGACAGACCACCGAATAGTAATCCCCGTAGAATCTCCAATTCGTGTTCTTATCTCAG  
CTGAAGATGTCCTTCATTCCTGAGCAGTCCCCTCACTGGGCGTAAAAGTTGACGCCG  
TGCCTGGTTCGCTTAAACCAAGCGACCTTTATCGTCAGCCGACCAGGCGTATACTTCG  
GACAATGCTCTGAAATCTGCGGGGCAAACCATAGTTTCATACCCATCGTTGTAGAAG  
CAGTCCCCCTTAAGCACTTTGAAAACCTGGTCTTCCCTAATAATTGAAGATGCCTATG  
GCCATCAAGCACACCCATACCACATAGTCGACCCCAGCCCATGACCCCTCACAGG  
GGCTATCGCTGCCTTACTGATAACATCTGGCCTTGCTATCTGATTTCACTTCCACTCC  
ACTGTCTTAATAACTATCGGAACAATCCTACTTACTTTAACAATCTTCCAATGGTGA  
CGAGACGTCGTACGAGAGGGGCACATTTACAGGGACACCACACTCTTCCTGTCCAAAA  
AGGCCTCCGATATGGTATAATCCTATTTATTACCTCAGAAGTTCTATTTTTCTAGGC  
TTTTTCTGAGCCTTCTACCACTCAAGCCTGGCACCCACCCCTGAACTAGGAGGCTTTT  
GACCACCAGCAGGCATTACACCCCTAGACCCGTTTGAAGTCCCCTTCTTAACACAG  
CAGTCCCTCCTTGCTTCTGGCGTGACTGTTACCTGAGCACATCACAGCATCATAGAGG  
GTAAACGAAAACAAGCTATTCAGGCCCTTGCTCTTACAATCTTACTTGGGGGGTACT  
TCACTTTTCTCCAAGCCCTCGAATATCACGAAGCCCCCTTCACTATTGCAGACGGGG  
TTTATGGTGCTACATTTTTTTGTTGCCACTGGCTTCCACGGACTACACGTCTTAATCGG  
CTCATATTCTTAGCCGTTTGTGTTGTTACGCCAAATTCTCCACCATTTTACATCAAAC  
CACCCTTTGGATTTGAAGCAGCCGCATGGTACTGACACTTCGTAGACGTCGTCTGA  
CTCTTCCTCTACATCTCTATTTACTGATGAGGATCTTAATGGCCAGTCTACGCAAATC  
TCACCCCTTCTAAAAATCGCAAACGATGCTTTAGTTGACCTCCCTGCCCCCTCTAAT  
ATCTCTGTTTGATGGAACCTTGGGTCCCTTCTAGGACTTTGCTTGGTTACTCAAATTG  
TAACCGGCTTATTTCTAGCCATACATTACACATCAGACATTGCTACTGCTTTTACCTC  
CGTCGCACATATCTGCCGAGACGTTAACTACGGTTGACTCGTCCGAAGCATCCATGC  
CAACGGCGCATCATTTTTTTTCACTTGTATTTACCTTCATATCGGCCGAGGCCTATAC  
TATGGCTCCTACCTCTATAAAGAAACATGAAATATCGGAGTTGTCCTCCTCCTCCTC  
GTAATAATAACAGCTTTCGTTGGATACGTCCTCCCTTGAGGACAAATATCGTTTTGA  
GGTGCAACCGTTATTACCAATCTTCTGTCCGCCGTCCCTTATGTCGGCAACACCCTTG  
TCCAATGAATCTGAGGTGGCTTTTCCGTAGACAATGCTACCCTCACCCGGTTCTTTGC  
ATTCCACTTCCTCTTCCCATTTATTATCGCAGCCGCAACGGTGATTCATCTTCTCTTC  
CTTCACGAAACTGGCTCAAATAACCCACCCGGGTTGACTTCAGATTCCGACAAGGTC  
CCTTTCCACCCTTACTTCACTTACAAGGACCTCTTGGCTTTGCAGTCCTTCTTGCTGC  
ACTAGCATCCCTTGCCCTGTTTTCCCCGAACCTTTTAGGAGACCCAGACAACCTTACC  
CCCGCAAATCCACTTGTTACTCCTCCACATATCAAGCCAGAATGATACTTCCTCTTTG  
CTTACGCTATCCTCCGCTCCATCCCAAACAACTTGGAGGCGTACTTGCCCTTTTGTT  
TTCGATCTTAGTTCTAATACTCGTCCCTCTTCTACATACCTCTAAACAGCGAAGTCTC  
ATATTCCGCCCTCTAACACAATTCTTATTCTGATCATTAGTCGCAGACGTTATAATTC  
TAACTTGAATTGGGGGAATACCCGTAGAGCACCCCTTCGTCATCATTGGTCAAATAG  
CATCACTCCTTTATTTCTCACTCTTCCTTATCCTAATCCCAGCAGCAGGTTGACTGGA  
GAACAAAGTGCTCGGATGAAAATATGATTTCAACTCTCATTACGCATATTATTAATC  
CATTAACTTTATTGTACCCGTATTGCTAGCCGTAGCATTCCCTTACCCTCCTTGAACG  
AAAAGTACTAGGCTACATACAACCTCCGAAAAGGACCAAACATCGTAGGGCCTTACG  
GTCTCCTCCAACCCATTGCTGACGGCGTAAACTCTTTATTAAAGAACCCGTTTCGAC  
CTTCAACCGCATCCCCCATCTTGTTCCCTCCTAGCCCCAATGCTCGCACTTACACTAGC  
CCTTGCCCTTTGAGCCCCTATACCTTTCCCATATCCTGTTGTAGATCTTAACCTCGGT  
ATTTTATTTATTCTGGCACTATCTAGCCTCGCAGTATACTCTATTTTGGGGTCCGGCT  
GAGCATCCAATTCAAATATGCCTTAGTTGGGGCACTTCGGGCGGTTGCACAAACCA  
TTTCCTACGAAGTCAGCCTGGGACTCATCTTACTTAATATTATTATCTTTACCGGGGG  
CTTTACACTCCAGACCTTTAACACAGCACAAAGAGGCCATCTGACTAGTACTGCCTGC

TTGACCCCTAGCTGCCATGTGATTTCATCTCCACTCTTGCCGAAACAAACCGTGCTCC  
CTTCGACCTGACAGAGGGTGAATCCGAACTTGTCTCAGGCTTCAACGTAGAGTACGC  
AGGCGGGGCCCTTCGCCCTATTCTTTCTGGCCGAGTATTCAAACATCCTCCTAATAAA  
TACTCTGTCCGCGACACTATTTTTGGGCGCCTCTCACATTCCGTCTATCCCCGAATTA  
ACCAGCATCAATATTATAACTAAAGCAGCCCTTCTATCAATCGTCTTCCTGTGGGCC  
CGAGCTTCCTACCCCCGATTCCGTTATGACCAGCTCATAACCTCATCTGAAAAAAC  
TTCTCCCACTAACTTTAGCTCTGGTTATTTGACATTTAGCGCTTCCCATCGCATTTCG  
CTGGGCTTCCCCCACAACCTGTAAATGAACCCCTACATCTTGACCACCCTTCTATTTGG  
TTAGGCTTGGGTACAACACTCACGTTTGCAAGCTCACACTGGCTCCTCGCTTGAT  
GGGCCTTGAGATTAATACACTAGCCATCATCCCCCTAATAGCCCACCATCACCACCC  
ACGAGCAGTTGAAGCTACTACTAAATATTTCTCGCACAAGCCACAGCAGCCGCCA  
CCCTCCTGTTTGCGAGTACTACTAACGCTTGACTCACCGGCCAATGGGATGTTCAAC  
AAATGACACACCCACTTCCCACAACCTATAATTGTTATTGCCCTAGCACTAAAAATTG  
GACTAGCACCAATGCACTCTTGACTCCCGGAAGTTCTTCAAGGACTAGACCTCACCA  
CTGGACTAATCCTCTCAACCTGACAAAAACTTGCCCCCTTTACCCTTTTGTACAAAT  
CCAGATAACAATCCTATGCCCCTAATCATTATTGGCTTACTTTCTACCCTCATTGGCG  
GCTGAGGTGGCCTCAACCAAACCCAATTACGTAAGATCCTTGCCCTATTCTCAATCG  
CTCACCTTGGCTGAATAGTACTGATTCTTCAATTTTCACCACTCCTCAGTCTCCTCAC  
CCTCCTCACGTACTTTCCATGACTTTTTCAACATTCCTAATCTTCAAAGTAAACAAGG  
CTACCACTATCAATACCCTCGCAATCTCGTGAACAAAACTCCTGTCCTCACAGCCC  
TAGCACCTCTCGTCTTATTATCTCTGGGCGGCCTTCCCCCTCTAACCGGCTTCATACC  
CAAATGATTTATTCTCCAAGAATTAACCTAAGCAAGACCTCCCACGCTTGCCACCCTC  
ACTGCATTAACTGCCCTCCTGAGTCTTTACTTCTACTTACGTCTCTCATACGCAATAA  
CCCTCACAAATGTTCCCTAACAACCTCATTGGTATTACTCCCTGACGATTCTACTCCCC  
CCAATCAACCCTCCCCCTCGCCGTATCCACTGCAGCAACCACACTTCTCCTCCCACT  
AGCACCACTGCCCCTAGCACTACTCATCACCTATGAGCCTCCTTCTAACCATCCTTTC  
AATTGCTTCCCTCCTCTCAACAGTACTTGCCATTGTATCCTTTTGACTACCCCAAATT  
ATTCCAGACCATGAAAAGCTATCACCATATGAATGCGGCTTTGACCCTATGGGGTCC  
GCCCAGTACCTTTTTCACTGCGATTTTTTCTCATTGCCATCCTTTTTCTTCTCTCGA  
CCTAGAGATTGCTCTCCTCCTCCCCCTCCCCTGAGGAGACCAACTAGCTTCACCATT  
GCTTACATTCACCTGAGCTACAGCTGTCCTAGCCCTCCTAACCCTTGGCCTCATTTAT  
GAATGAGTTCAAGGAGGCTTAGAATGGGCTGAATATGCTAAAAATTCTTATTCCAAC  
ACTTATACTTATTCCAACAGCCTGGTTGCTCAAACCCAGCCAACTCTGACCCATTAC  
CTTAATGTATAGCTTTTGCATCTCCTTACTTAGCCTCTCGTGACTAAAAAACCTCTCA  
GAAACCGGCTGATCGTCACTCAACCTATTTATGGCCACCGACCCCCTATCAAAACCT  
CTCCTCGTTCTTACATGCTGACTGCTCCCCTAATGATCTTAGCAAGTCAGAAACAC  
ACAGCCTCAGAGCCCCCTCAACCGCCAGCGCATGTACATCACGCTTCTCTCTTCTCCTCC  
AGTTCTTCTAATTCTAGCATTTAGCGCCACAGAACTAGTAATGTTCTACGTAATATT  
TGAAGCTACCCTCATCCCCACACTAATCATTATTACCCGCTGGGGAAACCAAACAGA  
ACGCTTAAATGCAGGAACCTATTTTCTTCTACACATTAGCAGGCTCACTTCCTCTC  
CTCGTTGCTTTACTTCTACTTCAAAATTCATCCGGCACCTTATCTTTATTAACCCTCC  
ATTACACAAACCCCCCTCGCTCTCATCTTACGCAGACAAATTATGATGAGCAGGCTGT  
CTTCTAGCATTTCTAGTTAAAATGCCCTCTATGGAGTCCACCTCTGACTTCCTAAGG  
CCCACGTTGAAGCCCCAATTGCAGGCTCAATAATCCTTGACGCGGTCTTCTAAAAC  
TAGGAGGGTACGGCATAATCCGCATAATGACAATGCTAGAACCTCTAACTAAGGAA  
CTAAGCTACCCATTATTGTCTTTGCACTTTGAGGGGTATTATGACCGGCTCAATTT  
GCCTGCGACAAACGGACCTCAAATCCCTAATTGCCTACTCATCTGTAAGCCACATGG  
GTCTAGTGGCCGGGGGCATTCTTATTCAATCACCTGGGGCTTAACGGGGGCCCTTA



CCCTTATGATCGCACATGGTCTTACCTCATCAGCCCTCTTCTGCCTGGCAAACACAA  
ACTATGAACGAACCCATAGCCGGACGATAGTCCTAGCACGGGGCCTTCAAGTAGCT  
CTACCCCTGATAGCCACTTGATGGTTTATTTCTAGCCTGGCCAACCTGGCTCTTCCTC  
CCCTACCCAATCTCATGGGTGAACTAATAATTATCACTTCCCTGTTCAACTGATCCTG  
ATGAACCCTGGTATTAACGGGTGGGGGTACTTTAATTACAGCTGGTTATTCCCTCTA  
CATATTCTTAATAACCCAACGAGGCCCTCTCCCAACACATGTTATTGCACTTGAACC  
CTCTCATACCCGAGAACACCTTCTTATTGCCTTCACCTAGTCCCCCTAATTCTACTCG  
TTCTTAAGCCCGAACTGATCTGAGGTGGACTGCCTATGACCCCCACACACTTTGCC  
TTCTCCTCAGCCTTTTTTCTAGGTTTAACAGGCCTGGCATTCCACCGGTTCCACCTCC  
TCTCCGCCCTATTATGCCTTGAAGGAATAATATTATCCCTGTTTATTGCTCTCTCCCT  
GTGGACACTCCAGCTTGACTCAACCAACTTCTCAGCATCTCCTATGCTCCTACTTGCA  
TTTTCAGCCTGTGAAGCAAGCGCCGGCCTCGCCCTTCTGGTAGCCACCGCTCGAACC  
CACGGAACCGACCGACTACAAAGCCTAAACCTTCTACAATGCTAAATGTACTCTACC  
TCCCTCATGATTTCCCTCAAGCCTGATTACGATCTTTGCACTACTGGCTTATCCTCTCA  
TTACTACGATTGAGCCTGCACCTCAAACCCCTCAATGAGCTTCTACCCATGTCAAAA  
CAGCTGTAAAAATAGCCTTCTTTGTTAGCCTTTTACCCCTCGCCCTCTTTCTCCATGA  
AGGTGCCGAAACAATCATTTCTGACTGAACCTGAATAAACTAACTCCTTCAACAT  
TACTATCAGCCTAAAATTTGACTTCTACTCAATTATTTTCACACCCATTGCCCTTTAC  
GTTACTTGGTCCATTTTAGAATTCGCATCATGATATATGCATGCAGACCCACAAATG  
AACCGCTTCTTTAAATACCTCCTGACATTTCTGATTGCCATGATTATCCTAGTAACCG  
CAAACAACATATTCCAACATTTATCGGTTGGGAAGGTGTGGGAATTATATCATTTTC  
TCCTTATCGGGTGGTGGTTCGGACGGGCAGATGCTAACACCGCTGCACTCCAAGCAG  
TGCTCTATAACCGTGTGGGGGATATCGGGCTTATCTTTGCTATGGCTTGAATAGCAG  
CAAACCTAACTCCTGGGAAATAACAACAAGTCTTTGCAGCCTCTAAAAACATAGAC  
TTAACCTACCCCTCCTCGGACTAATCATCGCAGCAACTGGCAAATCAGCCCAATTT  
GGACTGCACCCCTGGCTGCCCTCCGCTATGGAGGGGCCCCACACCGGTCTCTGCCCTA  
CTTCACTCTAGCACCATAGTCGTTGCCGGCATTTTTCCTGCTAGTACGAATGAGCCCC  
CTTATGGAGAACAACCCAACAGCCCTCACAACTTGCCTATGCCTCGGAGCCCTCACA  
ACATTTTTTACCGCAACCTGTGCCCTCACACAAAATGACATTAAAAAAATCATCGCA  
TTTTCTACATCCAGCCAGCTCGGACTCATAATGGTAACCATTTGGGCTAAACCAACCA  
CAACTAGCATTTCCTCCACATTTGCACACACGCCTTCTTCAAAGCCATACTATTTTTAT  
GCTCCGGATCTATTATTCACAGCCTAAATGACGAACAAGACATTCGAAAAATAGGG  
GGCATAACCCACCTTGCGCCTTATTCATCCTCCTGCCTAACTATTGGCAGCCTTGCCC  
TCACAGGAACCCCTTCTTGGCTGGTTTCTTCTCTAAAGATGCCATTATCGAAGCATT  
AAACACATCTCACCTGAACGCCTGAGCCCTCACCTTAACTCTCCTAGCCACCTCTTTC  
ACAGCAATTTACAGCTTTCGAGTAATATTCTTTGTGCCTATGGGCTACCCCGATTG  
CTGCCTCTCCCCAATCAACGAAAATAACCCAGCAGTAATCAACCCACTCAAGCGCCT  
AGCATGAGGAAGCATCATTGCAGGCTTACTTATTACCTCTAACATTACACCCCTAAA  
AACCCCTATTATATCTATACCCCTCTCCTTAAACTAGCTGCTCTTGCAGTTACAATT  
GCTGGCCTGCTTGTGGCCATAGAGCTCGCCGCATTAAGTAGTAAACATTACGAACCA  
ATGCCCCGACACAATATTCATCACTTCTCCACCTTACTAGGCTTCTTCCCCGGGGTTAT  
GCATCGCCTAACCCCATACTAGCCTTCTTCATAGGCCAAAACGTTGCCAACCACAA  
AGTAGATCAAACCTGATTAGAAAAGACAGGCCCCAAAGCCATCGAATCCTCTAACA  
AACCTCTGATTTCTCTACAAGTAACATCCAACGAGGACTGATCAAAACATACCTCC  
CCTCTTCCTTCTAACGCTAGCCCTCATAGTCCCAATATTTATTACCTAATGACTTTTG  
TTATGTATTTAGTTTTATTTTCTTGTGTTAGGGTTAGTTGCGGTTGCTTCTAATCCG  
TCTCCTTATTTGCTGCTTTAGGTTTAGTTGTGGTAGCTGGTATGGGGTGTGGTGTGC  
TAGTCGGGCATGGGGGGCCTTTTTTATCATTAGTTTTATTCTTAATTTATTTGGGCGG

GATGTTGGTTGTATTTGCATATTCAGCAGCGTTAGCTGCCGAGCCGTATCCGGAGAG  
CTGGGGTAGTTGATCGGTGCTGGTTTATGGTTATTTACATAGGAGGAGTAATGTCGT  
TTCAGGGTTGTTTTGAGGGGGGTGGTACGAATCGTCTTGGGTTTTAGCAGACGAGTT  
GGGGGAGTTTTCCGTGTTTCGGGGTGATATTGGGGGTGTTGCTTTAATACTCCTCT  
GGGGGGTGGTTGTTAATTATTAGTGCGTGGGTGCTACTTTAACTTTATTTGTAGTTC  
TTGAGCTGACCGCGGGATAAGTCGAGGAGCGTTGCGGCGGTTA"/>

<sequence id="seq\_Verasper\_variegatus\_MK210571" spec="Sequence"  
taxon="Verasper\_variegatus\_MK210571" totalcount="4"  
value="ATGGTATTAAGCTTCTTTGACCAATTTATATCCCCAGTATGCCTTGGCATCCC  
ACTAATTGCACTAGCAATTAGCCTGCCCTGAATTTTTTTCCCAGCCCCAAAAACCGT  
TGATTAAACAACCGCCTGTTAACCCCTCAAGGCTGATTTATGAGCAACTTCACCTCA  
CAACTCCTTTTACCCCTAAACCCCGGTGGTCACAAGTGAGCAATTCTGTTTACCTCA  
CTAATGTTTTTTTCTTCTATCAATATACTGGGTCTCCTTCCATACACCTTTACACCAA  
CAACTCAACTCTCCCTAAACCTAGGCTTCGCAGTGCCCTCTGATTAGCAACTGTCA  
TTATGGGATACGCAATCAACCAACACATGCACTAGGACACCTTCTTCCAGAAGGTAC  
GCCCCGTGCCCTCATTCCCGTACTTATTATTATCGAAACAATTAGCCTATTTCATTGCG  
CCCCTCGCTCTCGGTGTTGACTTACAGCAAATCTCACGGCAGGCCACTTACTCATT  
CAACTCATTGCAACAGCTGCCTTTGTCCTTCTTCCCCTAATACCCGTTGTTGCTGTCC  
TAACAACAGTAGTCCTCTTCCCTCCTGACTCTGCTAGAAATCGCCGTTGCCATGATTC  
AAGCCTATGTCTTCGTCCTACTCCTAAGCCTTTACCTACAAGAAAACGTTTAATGCCT  
CAACTGAACCCCGCACCCCTGATTTGCAATTTTAGTTTTCTCTTGAATAATCTTCCTAG  
TTGTAATCCCCCCTAAAATTTTAGCACACATCTACCCTAATGAGCCCACCTCCCAA  
GCACACAAAAATAAAACAGAATCCTGAAACTGACCATGGTATTAAGTGGCAATCAC  
ACGTTGATTTTTCTCGACCAATCACAAAGACATCGGCACCCTCTATCTCGTATTTGGT  
GCCTGAGCCGGAATAGTGGGGACAGGCCTTAGTCTACTTATTCGAGCAGAACTAAG  
CCAACCCGGGGCTCTCTTGGGGGACGACCAGATTTATAACGTAATCGTCACCGCACA  
CGCCTTTGTAATAATCTTCTTTATAGTTATACCCATTATGATCGGAGGATTTCGGAAAC  
TGACTTATTCCATTAATAATTGGAGCCCCAGACATGGCCTTCCCTCGAATGAATAAC  
ATGAGCTTCTGACTTCTTCCCCCTCATTTCTTCTACTCCTAGCCTCTTCAGGTGTTGA  
AGCTGGGGCAGGAACAGGGTGAACCGTTTATCCTCCACTAGCTGGCAATTTAGCCC  
ACGCCGGGGCCTCCGTAGACCTAACAATCTTTTCACTTCACCTTGCAGGAATTTTCAT  
CAATTCTGGGAGCAATTAACCTTTATTACTACTATCATCAACATAAAACCTACGACAG  
TAACTATGTACCAAATCCCGTTATTTGTCTGAGCCGTACTAATTACAGCCGTCCTACT  
TCTTCTTTCCCTTCCCGTCTTAGCCGCAGGAATTACAATGCTACTGACGGACCGAAA  
CCTTAACACGACCTTCTTTGACCCTGCCGGAGGGGGTGACCCTATCCTCTATCAACA  
TTTATTCTGATTCTTTGGTCAACCCGGAAGTATATATCCTCATTCTTCCAGGTTTCGGA  
ATAATTTCTCACATCGTAGCATACTATTCAGGTAAGAAAGAACCTTTTGGTTATATG  
GGGATGGTGTGAGCTATAATGGCCATCGGACTCCTCGGATTTATCGTATGGGCCCAT  
CACATGTTACAGTCGGTATAGATGTAGACACACGAGCCTATTTTACCTCTGCCACA  
ATAATTATTGCGATTCCAACCGGCGTAAAAGTCTTTAGTTGGCTCGCAACCCTTCAT  
GGGGGAAGCATTAAATGAGAGACACCACTTCTTTGGGCGCTGGGCTTTATTTTCCTG  
TTTACAGTAGGAGGACTAACC GGCAATTGTCTTAGCTAATTCTTCTCTTGATATTGTCC  
TACATGATACATACTATGTAGTAGCTCACTTCCACTATGTTCTATCCATAGGAGCTGT  
ATTTGCAATCGTTGCTGCCTTCGTCCACTGATTCCCCTATTTTCGGGCTATACCCTT  
CACTCTACATGAACAAAAATTCACTTCGGCCTGATGTTTATTGGGGTCAATCTAACA  
TTCTTCCCCCAACACTTCCTAGGTCTGGCCGGAATACCTCGACGGTACTCAGACTAC  
CCAGACGCTTACACCCTTTGAAATACTGTCTCATCAATTGGATCCCTAATGTCGCTTA  
TCGCTGTAATTTTATTTTATTTATTATTTGAGAAGCATTTACAGCCAAACGAGAAGT

TAGCGCAGTAGAACTAACTTCAACTAATATTGAATGACTCTACGGCTGCCCCCACC  
TTATCACACATTTGAAGAACCCGCATTTGTTCAAGTTCGAATTAATAATGGCTCA  
TCCCTCACAACCTCGGATTTCAAGACGCAGCTTCACCCTTAATAGAAGAACTACTTCA  
CTTCCACGACCACGCCTTAATAGTTGTTATTCTTATTAGCACGATAGTACTATATATT  
ATTGCCGCTATAGTCACAGCGGAACTTACAGATAAACTTGTCTAGACTCCCAAGAA  
ATTGAAATCATCTGAACAGTTCTCCAGCTGTGATTCTCATTCTTATTGCCCTACCAT  
CCCTCCGAATTTTATACTTGATAGACGAAATTAATGACCCTCACTTGACAATTAAAG  
CCATCGGCCATCAATGATACTGAAGTTACGAGTACACAGACTACGAAGACCTCGGT  
TTGACTCTTACATAATTCCTACACAGGACCTTACTCCCGGGCAATTCGACTTCTAG  
AGACAGACCACCGAATAGTAATCCCCGTAGAATCTCCAATTCGTGTTCTTATCTCAG  
CTGAAGATGTCCTTCATTCCTGAGCAGTCCCCTCACTGGGCGTAAAAGTTGACGCCG  
TGCCTGGTCGCTTAAACCAAGCGACCTTTATCGTCAGCCGACCAGGCGTATACTTCG  
GACAATGCTCTGAAATCTGCGGGGCAAACCATAGTTTCATACCCATCGTTGTAGAAG  
CAGTCCCCCTTAAGCACTTTGAAAACCTGGTCTTCCCTAATAATTGAAGATGCCTATG  
GCCCATCAAGCACACCCATACCACATAGTCGACCCCAGCCCATGACCCCTCACAGG  
GGCTATCGCTGCCTTACTGATAACATCTGGCCTTGCTATCTGATTTCACTTCCACTCC  
ACTGTCTTAATAACTATCGGAACAATCCTACTTACTTTAACAATCTTCCAATGGTGA  
CGAGACGTCGTACGAGAGGGGCACATTTACAGGGACACCACACTCTTCCTGTCCAAAA  
AGGCCTCCGATATGGTATAATCCTATTTATTACCTCAGAAGTTCTATTTTTCTAGGC  
TTTTTCTGAGCCTTCTACCACTCAAGCCTGGCACCCACCCCTGAACTAGGAGGCTTTT  
GACCACCAGCAGGCATTACACCCCTAGACCCGTTTGAAGTCCCCTTCTTAACACAG  
CAGTCCCTCCTTGCTTCTGGCGTGACTGTTACCTGAGCACATCACAGCATCATAGAGG  
GTAAACGAAAACAAGCTATTCAGGCCCTTGCTCTTACAATCTTACTTGGGGGGTACT  
TCACTTTTCTCCAAGCCCTCGAATATCACGAAGCCCCCTTCACTATTGCAGACGGGG  
TTTATGGTGCTACATTTTTTTGTTGCCACTGGCTTCACGGACTACACGTCTTAATCGG  
CTCATCATTCTTAGCCGTTTGTGTTGTTACGCCAAATTCTCCACCATTTTACATCAAAC  
CACCCTTTGGATTTGAAGCAGCCGCATGGTACTGACACTTCGTAGACGTCGTCTGA  
CTCTTCCTCTACATCTCTATTTACTGATGAGGATCTTAATGGCCAGTCTACGCAAATC  
TCACCCCTTCTAAAAATCGCAAACGATGCTTTAGTTGACCTCCCTGCCCCCTCTAAT  
ATCTCTGTTTGATGGAACCTTTGGGTCCCTTCTAGGACTTTGCTTGGTACTCAAATTG  
TAACCGGCTTATTTCTAGCCATACATTACACATCAGACATTGCTACTGCTTTTACCTC  
CGTCGCACATATCTGCCGAGACGTAACTACGGTTGACTCGTCCGAAGCATCCATGC  
CAACGGCGCATCATTTTTTTTCAATTTGTATTTACCTTCATATCGGCCGAGGCCTATAC  
TATGGCTCCTACCTCTATAAAGAAACATGAAATATCGGAGTTGTCCTCCTCCTCCTC  
GTAATAATAACAGCTTTCGTTGGATACGTCCTCCCTTGAGGACAAATATCGTTTTGA  
GGTGCAACCGTTATTACCAATCTTCTGTCCGCCGTCCTTATGTCGGCAACACCCTTG  
TCCAATGAATCTGAGGTGGCTTTTCCGTAGACAATGCTACCCTCACCCGGTTCTTTGC  
ATTCCACTTCCTCTTCCCATTTATTATCGCAGCCGCAACGGTGATTCATCTTCTCTTC  
CTTCACGAAACTGGCTCAAATAACCCACCCGGGTGACTTCAGATTCCGACAAGGTC  
CCTTTCCACCCTTACTTCACTTACAAGGACCTCTTGGCTTTGCAGTCCTTCTTGCTGC  
ACTAGCATCCCTTGCCCTGTTTTCCCCGAACCTTTTAGGAGACCCAGACAACTTTACC  
CCCGCAAATCCACTTGTTACTCCTCCACATATCAAGCCAGAATGATACTTCCTCTTTG  
CTTACGCTATCCTCCGCTCCATCCCAAACAACTTGGAGGCGTACTTGCCCTTTTGTT  
TTCGATCTTAGTTCTAATACTCGTCCCTCTTCTACATACCTCTAAACAGCGAAGTCTC  
ATATTCCGCCCTCTAACACAATTCTTATTCTGATCATTAGTCGCAGACGTTATAATTC  
TAACTTGAATTGGGGGAATACCCGTAGAGCACCCCTTCGTCATCATTGGTCAAATAG  
CATCACTCCTTTATTTCTCACTCTTCCTTATCCTAATCCCAGCAGCAGGTTGACTGGA  
GAACAAAGTGCTCGGATGAAAATATGATTTCAACTCTCATTACGCATATTATTAATC

CATTAACCTTTATTGTACCCGTATTGCTAGCCGTAGCATTCCCTTACCCTCCTTGAACG  
AAAAGTACTAGGCTACATACAACCTCCGAAAAGGACCAAACATCGTAGGGCCTTACG  
GTCTCCTCCAACCCATTGCTGACGGCGTAAAACTCTTTATTAAAGAACCCGTTTCGAC  
CTTCAACCGCATCCCCCATCTTGTTCCCTCCTAGCCCCAATGCTCGCACTTACACTAGC  
CCTTACCCTTTGAGCCCCCTATACCTTTCCCATATCCTGTTGTAGATCTTAACCTCGGT  
ATTTTATTTATTCTGGCACTATCTAGCCTCGCAGTATACTCTATTTTGGGGTCCGGCT  
GAGCATCCAATTCAAAATATGCCTTAGTTGGGGCACTTCGGGGCCGTTGCACAAACCA  
TTTCCTACGAAGTCAGCCTGGGACTCATCTTACTTAATATTATTATCTTTACCGGGGG  
CTTTACACTCCAGACCTTTAACACAGCACAAGAGGCCATCTGACTAGTACTGCCTGC  
TTGACCCCTAGCTGCCATGTGATTTCATCTCCACTCTTGCCGAAACAAACCGTGCTCC  
CTTCGACCTGACAGAGGGTGAATCCGAACCTGTCTCAGGCTTCAACGTAGAGTACGC  
AGGCGGGCCCTTCGCCCTATTCTTTCTGGCCGAGTATTCAAACATCCTCCTAATAAA  
TACTCTGTCCGCGACACTATTTTTGGGGCGCCTCTCACATTCCGTCTATCCCCGAATTA  
ACCAGCATCAATATTATAACTAAAGCAGCCCTTCTATCAATCGTCTTCCTGTGGGCC  
CGAGCTTCCTACCCCCGATTCCGTTATGACCAGCTCATAACCTCATCTGAAAAAAC  
TTCCTCCCCTAACTTTAGCTCTGGTTATTTGACATTTAGCGCTTCCCATCGCATTTCG  
CTGGGCTTCCCCCACAACCTGTAAATGAACCCCTACATCTTGACCACCCTTCTATTTGG  
TTTAGGCTTGGGTACAACACTCACGTTTGCAAGCTCACACTGGCTCCTCGCTTGGAT  
GGGCCTTGAGATTAATACACTAGCCATCATCCCCCTAATAGCCCACCATCACCACCC  
ACGAGCAGTTGAAGCTACTACTAAATATTTCTCGCACAAGCCACAGCAGCCGCCA  
CCCTCCTGTTTGCGAGTACTACTAACGCTTGACTCACCGGCCAATGGGATGTTCAAC  
AAATGACACACCCACTTCCCACAACCTATAATTGTTATTGCCCTAGCACTAAAAATTG  
GACTAGCACCAATGCACTCTTGACTCCCGGAAGTTCTTCAAGGACTAGACCTCACCA  
CTGGACTAATCCTCTCAACCTGACAAAAACTTGCCCCCTTTACCCTTTTGTTACAAAT  
CCAGATAACAATCCTATGCCCCCTAATCATTATTGGCTTACTTTCTACCCTCATTGGCG  
GCTGAGGTGGCCTCAACCAAACCCAATTACGTAAGATCCTTGCCCTATTCCTCAATCG  
CTCACCTTGGCTGAATAGTACTGATTCTTCAATTTTACCACCTCCTCAGTCTCCTCAC  
TCTCCTCACGTACTTTCCATGACTTTTTCAACATTCCTAATCTTCAAAGTAAACAAGG  
CTACCCTATCAATACCCTCGCAATCTCGTGAACAAAACTCCTGTCTCCTCACAGCCC  
TAGCACCTCTCGTCTTATTATCTCTGGGCGGCCTTCCCCCTCTAACCGGCTTCATACC  
CAAATGATTTATTCTCCAAGAATTAATAAGCAAGACCTCCCACGCTTGCCACCCTC  
ACTGCATTAACCTGCCCTCCTGAGTCTTTACTTCTACTTACGTCTCTCATACGCAATAA  
CCCTCACAATGTTCCCTAACAACCTCATTGGTATTACTCCCTGACGATTCTACTCCCC  
CCAATCAACCCTCCCCCTCGCCGTATCCACTGCAGCAACCACACTTCTCCTCCCCT  
AGCACCTGCTGCCCTAGCACTACTCATCACCTATGAGCCTCCTTCTAACCATCCTTTC  
AATTGCTTCCCTCCTCTCAACAGTACTTGCCATTGTATCCTTTTGACTACCCCAAATT  
ATTCCAGACCATGAAAAGCTATCACCATATGAATGCGGCTTTGACCCTATGGGGTCC  
GCCCCGACTACCTTTTTTCACTGCGATTTTTTCTCATTGCCATCCTTTTTCTTCTTCGA  
CCTAGAGATTGCTCTCCTCCTCCCCCTCCCCTGAGGAGACCAACTAGCTTCACCATT  
GCTTACATTCACCTGAGCTACAGCTGTCTTAGCCCTCCTAACCCTTGGCCTCATTTAT  
GAATGAGTTCAAGGAGGCTTAGAATGGGCTGAATATGCTAAAAATTCTTATTCCAAC  
ACTTATACTTATTCCAACAGCCTGGTTGCTCAAACCCAGCCAACTCTGACCCATTAC  
CTTAATGTATAGCTTTTGCATCTCCTTACTTAGCCTCTCGTGACTAAAAAACCTCTCA  
GAAACCGGCTGATCGTCACTCAACCTATTTATGGCCACCGACCCCCTATCAAAACCT  
CTCCTCGTTCTTACATGCTGACTGCTCCCCTAATGATCTTAGCAAGTCAGAAACAC  
ACAGCCTCAGAGCCCCCTCAACCGCCAGCGCATGTACATCACGCTTCTCTCTTCCCTCC  
AGTTCTTCCCTAATTCTAGCATTTAGCGCCACAGAACTAGTAATGTTCTACGTAATATT  
TGAAGCTACCCTCATCCCCACACTAATCATTATTACCGCTGGGGAAACCAAACAGA

ACGCTTAAATGCAGGAACCTATTTTCTCTTCTACACATTAGCAGGCTCACTTCCTCTC  
CTCGTTGCTTTACTTCTACTTCAAAATTCATCCGGCACCTTATCTTTATTAACCCCTCC  
ATTACACAAACCCCCCTCGCTCTCATCTTACGCAGACAAATTATGATGAGCAGGCTGT  
CTTCTAGCATTTCTAGTTAAATGCCCTCTATGGAGTCCACCTCTGACTTCCTAAGG  
CCCACGTTGAAGCCCCAATTGCAGGCTCAATAATCCTTGCAGCGGTCCTTCTAAAC  
TAGGAGGGTACGGCATAATCCGCATAATGACAATGCTAGAACCTCTAACTAAGGAA  
CTAAGCTACCCATTTCATTGTCTTTGCACTTTGAGGGGTTATTATGACCGGCTCAATTT  
GCCTGCGACAAACGGACCTCAAATCCCTAATTGCCTACTCATCTGTAAGCCACATGG  
GTCTAGTGGCCGGGGGCATTCTTATTCAATCACCCCTGGGGCTTAACGGGGGGCCCTTA  
CCCTTATGATCGCACATGGTCTTACCTCATCAGCCCTCTTCTGCCTGGCAAACACAA  
ACTATGAACGAACCCATAGCCGGACGATAGTCCTAGCACGGGGCCTTCAAGTAGCT  
CTACCCCTGATAGCCACTTGATGGTTTATTTCTAGCCTGGCCAACCTGGCTCTTCCTC  
CCCTACCCAATCTCATGGGTGAACATAATAATTACTTCCCTGTTCAACTGATCCTG  
ATGAACCCTGGTATTAACGGGTGGGGGTACTTTAATTACAGCTGGTTATTCCCTCTA  
CATATTCTTAATAACCCAACGAGGGCCCTCTCCCAACACATGTTATTGCACTTGAACC  
CTCTCATACCCGAGAACACCTTCTTATTGCCTTCACCTAGTCCCCCTAATTCTACTCG  
TTCTTAAGCCCGAACTGATCTGAGGTTGGACTGCCTATGACCCCCACACACTTTGCC  
TTCTCCTCAGCCTTTTTTCTAGGTTTAACAGGCCTGGCATTCCACCGGTTCCACCTCC  
TCTCCGCCCTATTATGCCTTGAAGGAATAATATTATCCCTGTTTATTGCTCTCTCCCT  
GTGGACACTCCAGCTTGACTCAACCAACTTCTCAGCATCTCCTATGCTCCTACTTGCA  
TTTTCAGCCTGTGAAGCAAGCGCCGGCCTCGCCCTTCTGGTAGCCACCGCTCGAACC  
CACGGAACCGACCGACTACAAAGCCTAAACCTTCTACAATGCTAAATGTACTCTACC  
TCCCTCATGATTTCTCAAGCCTGATTACGATCTTTGCACTACTGGCTTATCCTCTCA  
TACTACGATTCAGCCTGCACCTCAAAACCCCTCAATGAGCTTCTACCCATGTCAAAA  
CAGCTGTAAAAATAGCCTTCTTTGTTAGCCTTTTACCCCTCGCCCTCTTTCTCCATGA  
AGGTGCCGAAACAATCATTTCTGACTGAACCTGAATAAACACTAACTCCTTCAACAT  
TACTATCAGCCTAAAATTTGACTTCTACTCAATTATTTTCACACCCATTGCCCTTTAC  
GTTACTTGGTCCATTTTAGAATTTCGCATCATGATATATGCATGCAGACCCACAAATG  
AACCGCTTCTTTAAATACCTCCTGACATTTCTGATTGCCATGATTATCCTAGTAACCG  
CAAACAACATATTCCAACATTTATCGGTTGGGAAGGTGTGGGAATTATATCATTTTC  
TCCTTATCGGGTGGTGGTTCGGACGGGCAGATGCTAACACCGCTGCACTCCAAGCAG  
TGCTCTATAACCGTGTGGGGGATATCGGGCTTATCTTTGCTATGGCTTGAATAGCAG  
CAAACCTAAACTCCTGGGAAATACAACAAGTCTTTGCAGCCTCTAAAAACATAGAC  
TTAACCTACCCCTCCTCGGACTAATCATCGCAGCAACTGGCAAATCAGCCCAATTT  
GGACTGCACCCCTGGCTGCCCTCCGCTATGGAGGGGCCCCACACCGGTCTCTGCCCTA  
CTTCACTCTAGCACCATAGTCGTTGCCGGCATTTTCTGCTAGTACGAATGAGCCCC  
CTTATGGAGAACAACCCAACAGCCCTCACAACCTTGCTATGCCTCGGAGCCCTCACA  
ACATTTTTTACCGCAACCTGTGCCCTCACACAAAATGACATTAAAAAAATCATCGCA  
TTTTCTACATCCAGCCAGCTCGGACTCATAATGGTAACCATTTGGGCTAAACCAACCA  
CAACTAGCATTCCTCCACATTTGCACACACGCCTTCTTCAAAGCCATACTATTTTTAT  
GCTCCGGATCTATTATTCACAGCCTAAATGACGAACAAGACATTGAAAAATAGGG  
GGCATACACCACCTTGCGCCTTATTCATCCTCCTGCCTAACTATTGGCAGCCTTGCCC  
TCACAGGAACCCCTTCTTGGCTGGTTTCTTCTCTAAAGATGCCATTATCGAAGCATT  
AAACACATCTCACCTGAACGCCTGAGCCCTCACCTTAACTCTCCTAGCCACCTCTTTC  
ACAGCAATTTACAGCTTTCGAGTAATATTCTTTGTGCCTATGGGCTACCCCCGATTG  
CTGCCTCTCCCCAATCAACGAAAATAACCCAGCAGTAATCAACCCACTCAAGCGCCT  
AGCATGAGGAAGCATCATTGCAGGCTTACTTATTACCTCTAACATTACACCCCTAAA  
AACCCCTATTATATCTATACCCCTCTCCTTAAACTAGCTGCTCTTGCAGTTACAATT

GCTGGCCTGCTTGTGGCCATAGAGCTCGCCGCATTAAGTAGTAAACATTACGAACCA  
ATGCCCCGACACAATATTCATCACTTCTCCACCTTACTAGGCTTCTTCCCCGGGGTTAT  
GCATCGCCTAACCCCCATACTAGCCTTCTTCATAGGCCAAAACGTTGCCAACCAAAC  
AGTAGATCAAACCTGATTAGAAAAGACAGGCCCAAAGCCATCGAATCCTCTAACA  
AACCTCTGATTTCTCTACAAGTAACATCCAACGAGGACTGATCAAAACATACCTCC  
CCTCTTCTTCTAACGCTAGCCCTCATAGTCCCAATATTTATTACCTAATGACTTTTG  
TTATGTATTTAGTTTTATTTTCTCTTGTGTTAGGGTTAGTTGCGGTTGCTTCTAATCCG  
TCTCCTTATTTTGCTGCTTTAGGTTTAGTTGTGGTAGCTGGTATGGGGTGTGGTGTGC  
TAGTCGGGCATGGGGGGCCTTTTTTATCATTAGTTTTATTCTTAATTTATTTGGGCGG  
GATGTTGGTTGTATTTGCATATTCAGCAGCGTTAGCTGCCGAGCCGTATCCGGAGAG  
CTGGGGTAGTTGATCGGTGCTGGTTTATGGTTATTTACATAGGAGGAGTAATGTCGT  
TTCAGGGTTGTTTTGAGGGGGGTGGTACGAATCGTCTTGGGTTTTAGCAGACGAGTT  
GGGGGAGTTTTCCGTGTTTCGGGGTGATATTGGGGGTGTTGCTTTAATACTCCTCT  
GGGGGGTGGTTGTTAATTATTAGTGCGTGGGTGCTACTTTAACTTTATTTGTAGTTC  
TTGAGCTGACCGCGGGATAAGTCGAGGAGCGTTGCGGCGGTTA"/>

</data>

<data

id="Fl26seq-pt8-11401-123ps4"

spec="Alignment"

name="alignment">

<sequence id="seq\_Cleisthenes\_herzensteini\_KT2238281" spec="Sequence"  
taxon="Cleisthenes\_herzensteini\_KT223828" totalcount="4"  
value="ATGATACTAAGCTTCTTTGACCAATTTATGTCCCCCGTATTCCTTGGTATCCC  
CCTAATTGCGCTAGCAATTACGCTGCCCTGAACCCTATTCCCAGCCCCTGTCTTCGCT  
GATTAAACAACCGTATAGTTTCACTTCAAGGGTGATTTATTAGCGGTTTTACATCTC  
AACTTCTTCTCCCACTAAACCCCGCCGGACACAAATGAGCTATCTTATTTGCCTCACT  
AATCTTTCTCTCTCTATCAATATGCTCGGACTCCTACCGTACACATTTACACCCACC  
ACTCAACTCTCACTTAACCTTGGCCTCGCAGTCCCACTCTGATTGGCAACTGTAATTA  
TGGTATGCGGAATCAACCGACAGTCGCTCTAGGCCACCTCCTTCCAGAAGGGACCCC  
CACCCCTCTCATCCCCGTCTTAATCATTATCGAAACAATTAGCCTATTTATTCGACCT  
CTCGCCCTTGGTGTTGCACTTACAGCAAATCTTACAGCTGGCCACCTGCTCATTCAA  
CTCATTGCAACAGCTGCCTTCGTCCTTCTTCCGCTCATGCCTGTGGTTGCTATTCTAA  
CAGCAACAGTTCTCTTTCTCCTCACTCTCCTAGAAGTTGCCGTTGCTATAATTCAGGC  
CTATGTCTTCGTTTTACTCCTGAGTCTTTACCTACAAGAAAACGTCTAATGCCCCAAC  
TGAATCCCGCACCCCTGATTTGCAATTTTGGTTTTCTCTTGAATAATCCTTTTAACTGT  
TATTCCCCCAAAAGTTTTAGCTCATACTTACCCCAACGAGCCAACCTCTCAAAGCAC  
ACAAAAACAAAACAGAACCCTGAAACTGACCATGATACTAAGTGGCAATCACACGT  
TGATTTTTCTCGACCAATCACAAAGACATCGGCACCCCTCTATCTCGTATTTGGTGCCT  
GAGCCGGAATAGTGGGGACAGGCCTAAGTCTACTCATTGAGCAGAACTCAGCCAA  
CCTGGGGCTCTCCTGGGAGACGATCAGATCTATAACGTGATCGTTACCGCACACGCC  
TTTGTAATAATCTTCTTTATAGTAATACCAATTATGATTGGAGGATTTGGGAACTGA  
CTTATCCCTCTAATGATCGGGGCCCTGACATGGCTTTCCCCCGGATAAACAACATG  
AGTTTCTGACTTTTACCCCATCTTTTCTCCTTCTCTTAGCCTCTTCAGGCGTAGAAG  
CCGGGGCTGGGACTGGGTGAACCGTATATCCTCCGCTGGCTGGAAATTTAGCACAC  
GCCGGAGCGTCCGTAGACCTCACAAATCTTCTCCCTTCACCTTGCCGGGATTTTCATCA

ATCCTGGGGGCAATCAACTTTATTACCACCATTATCAATATGAAACCTACAGCGGTT  
ACTATATAACCAAATTCCACTATTTCGTGTGGGCAGTACTAATCACAGCCGTTCTTCTTC  
TCCTTTCCCTTCCAGTCTTAGCCGCTGGCATCACAATGCTGCTCACAGACCGTAACCT  
AAACACAACCTTTCTTTGACCCCGCCGGAGGAGGTGACCCCATCCTCTATCAACACCT  
ATTCTGATTCTTTGGCCACCCAGAGGTATACATTTTAATTCTTCCCGGCTTCGGAATG  
ATTTCCACATTGTTGCATACTATGCAGGTAAGAAAGAACCCTTTGGCTACATGGGC  
ATAGTCTGGGCTATGATAGCTATCGGACTGCTGGGCTTCATCGTATGGGCCCATCAC  
ATGTTTACGGTTGGAATAGATGTGGACACACGAGCCTACTTTACTTCTGCCACAATG  
ATTATCGCCATCCCAACAGGCGTTAAAGTCTTTAGCTGACTCGCAACCCTTCATGGA  
GGAAGCATTAATGAGAAACCCCGCTTCTGTGGGCTCTCGGCTTCATTTTCCTATTT  
ACAGTAGGCGGCCTTACTGGTATTGTTTTAGCTAACTCCTCTCTAGACATCGTTCTTC  
ACGACACATACTATGTAGTAGCCCACTTCCACTATGTACTATCTATGGGTGCTGTGT  
TTGCAATCGTTGCCGCCTTCGTACACTGATTCCCCCTTTTTACAGGATATACCCTTCA  
CTCCGCATGAACAAAAATCCACTTTGGCCTTATATTTGTAGGAGTTAATCTTACATTC  
TTCCCCCAGCACTTTCCTTGGCCTGGCCGGAATGCCTCGACGGTACTCGGACTACCCA  
GATGCATACACCCTTTGAAATACTGTCTCATCGATCGGGTCACTAATGTCCCTCGTC  
GCTGTGATTTTATTTTTGTTTATTATTTGAGAAGCATTACAGCCAAACGAGAAGTC  
GGAGCAGTAGAATTAACCTCAACTAATATTGAATGACTTTACGGCTGCCCCCACC  
TACCACACATTTGAGGAGCCCGCATTCGTTCAAGTTCGTATAAACTAAATGGCACAT  
CCGTCACAACCTGGGGTTTCAGGACGCAGCTTCCCCCCTAATAGAAGAACTACTTCAC  
TTCCACGATCACGCCTTAATAATTGTCATTCTCATCAGCGCAATAGTGCTTTATATTA  
TTGTGGCAATGGTCACGGCCAACTAACCGACAACTTGTATTAGATTCTCAAGAAA  
TTGAAGTAATCTGGACAGTTCTCCCAGCTATTATCCTAATTCTCATCGCCCTGCCGTC  
TCTCCGCATTTTATACTTAATGGACGAAATTAACGACCCCCACCTAACAATCAAAGC  
CTTAGGCCACCAATGATACTGAAGCTACGAATATACAGACTACCAAGACCTTGTTTT  
TGACTCCTATATGATTCCAACACAAGACCTAACCCCTGGGCAATTCCGACTGCTTGA  
AGCAGACCACCGAATGGTAATTCCCGTCGAATCCCCAATTTCGAGTCCTTATTTACGC  
TGAAGATGTCTTACATTCTGAGCAGTCCCCCTCGCTCGGCGTAAAAGTTGATGCTGT  
GCCTGGCCGATTAAACCAAGCAACCTTTATTGTTAGCCGACCGGGCGTCTTCTACGG  
CCAATGCTCTGAGATTTGCGGGGCGAACCATAGTTTTATACCCGTCGTTGTAGAAGC  
AGTCCCCTTGACCACTTTGAAGACTGGTCTTCGCTAATAATTGAAGACGCCTATGG  
CCCCTCAAGCGCACCCGTACCACATAGTTGACCCTAGCCCATGACCCCTCACGGGGG  
CTATCGCTGCCCTATTGATAACATCTGGCCTTGCTATCTGATTCCACTTCCACTCTAC  
CACCCTAATAACTATTGGGACAATTCTTCTTACTTTAACAGTCTTCCAGTGATGACG  
AGATGTTATTCGAGAAGGAACATTTCAAGGACACCACACCCCTCCGGTTCAAAAAG  
GCCTCCGATACGGTATAATCCTTTTTTATTACCTCAGAAGTCCTATTTTTCTTAGGCTT  
CTTCTGGGCTTTTTTACCACTCAAGCCTCGCACCAACCCCGAGCTAGGGGGTTTCTG  
ACCCCCCGCAGGTATTACCCCTCTAGACCCATTTGAAGTCCCCTTCTTAACACAGC  
AGTACTGCTTGCCTCTGGCGTAACTGTTACATGAGCACACCACAGCATTATGGAGGG  
TGAACGAAAACAAGCTATCCAATCTCTTGCTCTACAATCTTACTCGGGGGGTACTT  
CACCTTCCTACAAGGCCTTGAATACCACGAAGCTCCATTCACCATTGCAGACGGAGT  
GTACGGTGCCACATTCTTTGTTGCCACTGGCTTCCACGGACTTCACGTTTTAATTGGC  
ACCTCTTTCTTAGCCGTTTGTCTGTTACGCCAAGTACTTCACCACTTTACATCCGACC  
ACCATTTTGGCTTTGAGGCAGCCGCATGATACTGACACTTTGTAGACGTTGTCTGAC  
TCTTCCTCTATATCTCTATCTACTGATGAGGATCTTAATGGCCAATCTCCGTAAATCC  
CACCCCTTCTTAAATCGCAAATGATGCTGTAGTGGACCTCCAGCCCCCTCCAAC  
ATCTCTGTCTGATGAAACTTCGGGTCTCTCTTGGGGCTCTGCTTAGTAACTCAGATCG  
CTACCGGCTTATTCTTAGCCATACACTACACATCAGATATTGCTACTGCCTTCACATC

CGTTGCACACATCTGTCTGAGATGTAACTACGGCTGACTTATCCGAAGCATTTCATGC  
CAATGGCGCATCATTCTTTTTTCATTTGCATTTACCTTCACATCGGCCGTGGTCTCTAC  
TATGGTTCCTACCTTTATAAAGAAACATGAACTATCGGTGTTGTACTTCTCCTCCTCG  
TAATAATGACCGCTTTCGTTGGATACGTCTCCCTTGAGGACAAATGTCATTTTGAG  
GTGCAACCGTCATTACCAACCTTCTGTCTGCAGTCCCCTATGTTGGGGGCTCCCTCGT  
CCAATGAATCTGAGGCGGCTTTTCTGTAGATAACGCCACACTCACCCGCTTCTTTGC  
ATTCCACTTCCTTTTCCCCTTCATTATCGCAGCCGCCACAGTAATTCATCTACTTTTCC  
TCCACGAGACTGGCTCAAACAACCCACCGGATTAAACTCAAACCTCCGATAAAGTC  
CCATTCCACCCCTACTTCACATACAAAGACCTTTTGGCTTTGCAGTCCTTCTTACAGC  
CCTGGCCTCCCTTGCCCTATTCTCCCCCAACCTTCTAGGAGATCCTGACAACCTTTACT  
CCTGCAAACCCACTTGTTACACCCCCACACATTAAGCCAGAGTGATATTTCTTATTT  
GCCTACGCCATTCTCCGCTCCATCCCAAACAAGCTTGGGGGTGTAATTGCCCTTTTAT  
TCTCCATCCTAGTCCTTATACTTGTCCCCTTCCTACACACTTCCAAACAACGTAGTCT  
CATGTTCCGCCCTGTAACACAGTTTTTTGTTCTGATCCTTAGTAGCTGACGTAATAATT  
CTGACTTGAATTGGAGGAATACCCGTAGAGCACCTTTTGTAATCATTGGTCAAGTA  
GCATCTCTTATTTACTTCTCCCTCTTCCTAGTCCTTATTCCAACAGCAGGTTGAATGG  
AAAACAAAGTCCTTGGATGAACTATGATTTCAACCCTCATTACGCATATTATTAAC  
CCACTAGCCTTTATTGTACCCGTCTTGTTAGCCGTAGCATTCCTAACCCTCCTTGAAC  
GAAAAGTGCTAGGCTACATGCAACTACGAAAAGGTCCTAACATCGTTGGGCCTTAC  
GGCCTCCTTCAACCTATTGCTGACGGCGTAAACTTTTCATCAAGGAACCCGTTTCGC  
CCTTCAACCTCCTCACCAGTCTTATTCCTTTTATCACCCATACTCGCACTTACCCTAG  
CCCTTGCACTCTGAGCACCTATACCCTTCCCGTACCCTGTCGTAGACCTTAACCTCGG  
TATTTTGTATTATTCTAGCCCTATCTAGCCTTGCAGTATACTCCATCCTCGGGTCAGGC  
TGAGCATCCAATTCAAATATGCTCTAATGGGAGCACTCCGTGCTGTTGCACAAACA  
ATTTCTTACGAAGTTAGCCTTGGTCTCATCTTACTCAGCATCATTATCTTTGCAGGAG  
GCTTCACACTCCAAACCTTCAACACAGCCCAAGAAGCTATCTGACTAGTAGTACCTG  
CATGACCCCTGGCTGCCATATGATACATCTCCACCCTCGCCGAAACAAACCGTGCAC  
CCTTCGACCTAACAGAGGGGGAGTCTGAACTCGTCTCAGGCTTCAACGTAGAGTAC  
GCAGGAGGGCCCTTCGCTTTGTTCTTTTGGCCGAATATTCAAATATTCTCCTAATAA  
ACACACTGTCCGCAACACTATTTTTAGGCGCTTCACACATTCCAAACATCCCAGAAT  
TAACAAGCATCAACTTGATAACTAAAGCAGCCCTCCTATCAGTTGTTTTTCTCTGAG  
TCCGAGCTTCGTACCCGCGGTTCCGTTACGACCAACTTATGCACCTTATTTGAAAAA  
ATTTTCTCCCACTAACACTGGCGCTGGTTATTTGACACTTAGCGCTCCCTATTGCATT  
CGCTGGCCTTCCACCTCAGCTGTAAATGAACCCCTACATCTTGTCCACCCTTCTATTT  
GGTTTGGGCCTAGGTACAACACTCACATTTGCAAGCTCACACTGGCTTCTCGCATGA  
ATGGGCCTTGAGATTAATACTAGCCATTGTCCCACTAATAGCCCAACATAATCAC  
CCTCGGGCAGTCGAAGCCACTACTAAATACTTCCTGGCACAAGCCACAGCAGCCGC  
CACTCTCCTGTTTGCAAGCACCAACGCTTGAATCACCGGCCAATGAGATATTCA  
ACAGATAACCCACCCACTCCCCACAACCATAGTTGTAATTGCTCTAGCACTAAAAAT  
CGGACTAGCACCTATACACTCTTGACTTCCCGAAGTCCTTCAGGGCTTAAACCTCAC  
CACTGGTCTTATTTTGTCAACCTGACAAAAGCTTGCACCATTGTCCTATTGCTACAA  
ATTCAAACAACAACCCACCCCTCTAATCATCATTGGCCTTCTCTCTGCCCTTATTGG  
CGGCTGAGGTGGCCTCAACCAAACCTCAGCTACGCAAAGTCCTTGCCTACTCCTCAAT  
CGCTCACCTTGGCTGAATAATACTTATTCTTCAATTTTCACCTCTCCTGAGCCTCCTT  
GCACTCCTGACATATCTTCTATGACCTTCTCAGCCTTCCTTATCTTCAAAGTAAACAA  
AGCCACTACCGTTAATGCACTCGCAATCTCTTGAGCCAAAACCTCCCGCCCTTACAGC  
CCTCGCACCCCTTGTTTTACTCTCCCTCGGAGGCCTCCCACCACTAACAGGCTTCATA  
CCAAAATGATTTATTCTTCAAGAACTCACTAAACAAGACCTGCCACACTTGCTACCC



TCGCTGCATTAACCGCACTCTTAAGCCTCTACTTCTACCTCCGACTCTCATATGCTAT  
GACCCTAACAATATTCCCCAATAACCTCATTGGCATGACCCCCTGACGATTCTCCAC  
CCCCAATTCACCCTTCCCCTCGCCATTTCCACTGCGGCAACTACGCTTCTCCTCCCA  
TTAGCACCTGCTGCCGTAGCTCTCCTCATAGCCTATGAGCCTTCTTCTAACCATCATT  
TCAATTACCGCCCTCCTCTCAACAGTTCTTGCCATTGTATCCTTTTGACTCCCCCAA  
TTACACCAGACTATGAAAACTGTCACCATACGAGTGTGGCTTTGACCCCATTGGTT  
CCGCCCCGACTACCTTTCTCAATGCGATTTTTTCTCATCGCTATCCTCTTTCTTCTCTC  
GACTTAGAAATTGCCCTTCTCCTCCCTCTCCCCTGAGGTGATCAATTGACATCCCCC  
TACTTACATTTACCTGAGCCACAGTGGTTCTATCACTCCTAACCCTTGGCCTCATCTA  
TGAGTGAGTGCAAGGAGGCCTAGAATGGGCTGAATATGCTAAAAATTCTAATCCCA  
ACACTTATGCTAATTCCAACAGCCTGACTACTTAAACCTAGCTGGCTTTGACTCATA  
ACTCTGTTATATAGCTTTTGCATCTCCCTAGCTAGCCTTTCATGATTAAAGAACCTCT  
CGGAAACCGGCTGAACCTCACTCAACCTATTTATAGCCACCGACTCCTTGTCAACAC  
CACTTCTCGTTCTAACATGTTGACTACTTCCCCTAATAATCTTGGCAAGCCAAAAAC  
ACACAGCCTCAGAGCCCCTGAATCGGCAGCGCATATACATCTCACTTCTCGCCTCCT  
CCAGTTTTTCCTGATCCTAGCATTTCAGCGCCACAGAACTAGTAATGTTCTACGTAAT  
ATTTGAAGCTACCCTTATCCCCACACTGATTATTATTACCCGCTGAGGTAACCAAAC  
AGAGCGCCTAAACGCAGGAACCTACTTCCTCTTTTATACACTAGCAGGCTCACTTCC  
CCTTCTTGTTGCCTTACTCTTACTCCAAAATACATCCGGAACCTCTCTCATTATTAACA  
CTCCACTATACAGACCCACTTGCTGTCATCCTATGCAGACAAATTATGGTGAGCCGG  
ATGTCTGCTAGCTTTCCTGGTTAAAATACCACTTTACGGTGTTCACCTGTGACTTCCA  
AAAGCACACGTTGAAGCCCCAATTGCAGGCTCAATAATTTTTGCAGCAGTTTTGCTT  
AAGCTGGGAGGTTACGGCATAATCCGCATAATAACAATACTAGAGCCCCTAACTAA  
AGAATAAGCTACCCATTCAATTATCTTCGCACTTTGAGGTGTAATCATAACTGGCTC  
AATTTGTCTACGACAAACCGACCTTAAGTCGTTAATTGCCTATTCTCTGTAGCCAC  
ATGGGCCTCGTAGCCGGAGGAATTCTCATTCAATCCCCCTGAGGTCTCACGGGGGCA  
CTAACACTTATGATTGCTCACGGCCTTACCTCCTCAGCCCTATTCTGCCTAGCAAATA  
CAAATAATGAGCGGACTCACAGCCGCACAATAGTTTTGGCACGAGGACTGCAAGTA  
GCACTGCCCCCTAATAGCCACCTGATGATTCGTTTCAAGTCTAGCCAACCTAGCCCTA  
CCACCACTACCCAACCTCATGGGGGAGCTAATAATTATCACCTCCCTCTTTGACTGA  
TCCTGGTGAACGCTCGCACTAACAGGGTCCGGAACCCTCATTACCGCTGGCTACAGC  
CTCTATATGTTCTTAATAACTCAACGAGGCCCTCTCCCAACACATGTGATTGCACTTG  
AACCCTCACACACCCGAGAACATCTCCTTATTGCCTTCACCTTATTCCTCTTGTGCTT  
CTCGTACTTAAACCCGAGCTGATCTGAGGCTGAACTGCCTATGACCCCAACACACTT  
TGCTTTCTCCTCAGCCTTTTTTTCTAGGTTCAACAGGCCTGGCATTCCACCGGTCCCAC  
CTCCTTTCCGCACTACTGTGCCTTGAAGGTATAATACTGTCCCTATTTATTGGCCTTT  
CCCTCTGAACGCTGCAACTAGACTCAACCAACTTTTCAGCATCCCCGCTACTTCTACT  
CGCATTTTTCAGCCTGTGAAGCAAGCGCCGGGCTCGCTCTTCTGGCAGCCACTGCCCCG  
AACCCACGGAACCTGACCGACTACAAAGCTTAAACCTCCTCCAATGCTAAATGCACC  
CCACCTCCCTAATGATCTCATCAAGCTTGATTACAATCTTTGCATTACTAGCCTACCC  
CCTGGCCACCACCTTTCGTCTACACCTCAGGGGCCTCAATGAGCTACATCTCATGT  
CAAAACAGCTGTAAAGATAGCTTTCTTTGTTAGCCTCCTGCCCCTCGCCCTATTCTT  
AATGAGGGGGCCGAGACAATTGTTACTAACTGAGCCTGAATAAACACTAACACCTT  
CAACATCAACATTAGCCTTAAATTTGACTTTTATTCCATTATTTTTACACCAATTGCC  
CTCTACGTTACTTGATCCATTCTGGAGTTCGCCTCATGATACATACACGCTGACCCAC  
ACGTAAACCGCTTTCTTAAGTACCTTCTAACCTTTCTTATTGCCATAATCATCCTAGT  
AACTGCAAACAATATATTTCAACTCTTTATTGGCTGAGAGGGCGTAGGGATCATGTC  
CTTCCTCCTCATCGGGTGATGATACGGACGCGCAGACGCCAATACTGCAGCACTTCA

AGCAGTACTATATAACCGAGTCGGAGACATCGGACTAATCTTCGCCATAGCTTGAAT  
AGCAACAAACCTGAACTCCTGAGAAATACAACAAATCTTCGCAACTTCTAAAGACA  
TGGACTTAACATATCCCCTCATTGGGCTAATCATCGCAGCAACCGGGAAGTCAGCTC  
AATTTGGGCTCCACCCTTGTTACCATCGGCCATGGAAGGTCCTACACCGGTATCTG  
CCCTACTTCATTCTAGCACAATAGTCGTGGCCGGCATCTTCCTGCTGGTACGAATGA  
GCCACTTCTGGAAAACAACCCAATTGCCCTAACAACCTGTCTCTGTCTCGGAGCCC  
TCACAACCTATTCACTGCAACCTGCGCTTTAACACAAAATGACATTAATAAAAAATCG  
TCGCATTTTCTACATCCAGCCAGCTTGGACTCATGATAGTAACCATCGGACTAAACC  
AACCACAACCTAGCATTTCTACACATCTGTACACACGCCTTCTTTAAAGCCATACTAT  
TTCTTTGCTCAGGGTCTATTATTCATAGCCTCAACGACGAGCAAGACATCCGAAAAA  
TGGGAGGCATACACCACCTTGCGCCCTTTACATCATCTTGTTTAAACAATCGGGAGCC  
TCGCACTTACGGGCACCCCCTTCTTAGCTGGTTTCTTCTCTAAAGATGCCATCATCGA  
AGCATTAACACCTCCCATTAAACGCCTGAGCCCTAACCCCTTACCCTCCTGGCCAC  
CTCTTTTACAGCAATCTACAGCTTCCGTGTAGTCTTCTTTGTGCCTATAGGCCACCCC  
CGATTTAACCCATATCCCCTATCAACGAAAACAACCCCGCAGTAATTAACCCACTTA  
AGCGCCTGGCATGGGGGAGTATCATTGCAGGACTCCTAATTACCTCAAATATCACAC  
CCCTAAAAACCCCAGTGATGTCCATGCCTCCCCTCCTAAACTAGCTGCCCTTGCAG  
TTACAATCATCGGCCTACTTGTTGCCATAGAAGTTGCCATGTTAACCAACAAACAAT  
TTAAATCAACCCCTATCTTAACGTACACAACCTTCTCTAATATGCTAGGCTTTTTCCCT  
GCCATTGTACACCGACTAACCCCTAAACTAGGCCTCGTTCTCGGCCAAGACATCGCC  
AACCAAATAGTGGATCAAACCTGATTAGAGAAAGCAGGCCCCAAAGCCGTTGTATC  
TTCAACCTCCCCTAGTCTCTACAGCAAGCAACATCCAACGAGGAATAATCAAAAC  
CTATCTGCCCTCTTCCTTTTAACACTCGCCCTTATTGTCGCAACGTCCTCGCACAAAT  
GGCTTTTGTTATATATTTTATTTTATTTTCTTCGTGCTGGGGTTAGTTGCAGTTGCTT  
CTAATCCATCCCCCTACTATGCCGCTTACGGCTTAGTTGTGGTAGCTGGGATGGGGT  
GTAGTGTGTTAATTGGGCATGGGGCTCCTTTCTTATTTATAATTCTATTCCCTAATTTA  
TCTGGGCGGGATGTTGGTTGTGTTTGCATTTCGAGTAGCGATAGCTTCTGAGCCGCA  
TCCGTTGGTTGAAATTCTTGGGCAGTATTGGGTTACGCTTGTTTACATGGCAGCTA  
CCGTGCAGTTGCGGGGGTACTTCGAGGGGGATGGTATGAGTCGTCTTGGGTGACAG  
TAGATGGATTTGGGGGAGACTGAGCTGTTTCGGGGTGATCTCGGTGGGGTGGCCATG  
GTATATGGTTCTGGGGGAGGGCTTCTAGTTATTAGTGCGGGGGTATTGCTTTTAAACG  
CTTTTGTGGTCCTTGAGTTAGCCGGCCCATGTGCCGAGGGACGTTGCGACAATAA"/>

<sequence id="seq\_Hippoglossoides\_platessoides\_MN1228251"  
spec="Sequence" taxon="Hippoglossoides\_platessoides\_MN122825" totalcount="4"  
value="ATGATACTAAGCTTCTTTGACCAATTTATGTCTCCCGTATTCCCTTGGCATCCC  
CCTAATTGCCCTAGCAATTACACTGCCCTGAACCCTATTCCCTGCCCTGTCTTCGCT  
GATTAAACAACCGTATAGTCTCACTTCAAGGGTGGTTTATTAGCGGCTTTACGTCTC  
AACTTCTTCTCCCCCTAAATCCAGCCGGGCACAAATGAGCGATTTTGTTCGCCTCAC  
TAATCTTTTCTTTTCTATTAACATGCTCGGACTCCTTCCGTATACATTTACACCTACA  
ACTCAACTCTCGCTTAACCTCGGCCTTGCAGTCCCACTCTGACTGGCAACTGTCATTA  
TGGTATACGGAACCAACCAACAGTCGCACTAGGCCACCTTCTTCCAGAAGGGACTC  
CCACCCCTCTCATCCCGGTACTAATTATTATCGAAACAATTAGCCTCTTTATCCGACC  
TCTCGCTCTCGGTGTTTCGGCTTACAGCAAATCTTACAGCTGGCCACCTGCTCATCCA  
ACTCATTGCAACAGCTGCCTTCGTTCTTCTTCCGCTTATGCCTGTTGTTGCTATTTTAA  
CAACAACAGTTCTCTTTCTCCTCACTCTCCTAGAAGTTGCAGTTGCTATAATTCAAGC  
CTATGTCTTTGTTTTACTACTAAGCCTTTACCTACAAGAGAACGTCTAATGCCCCAAC  
TGGACCCCGCACCCCTGATTTGCAATTTTGGTTTTCTCTTGAATAATCCTTTTAACTGT

TATTCCCCCAAAGTTTTAGCTCACACTTACCCAAATGAGCCAACCTCCCAAAGCAC  
ACAAAAACAAAACAGAACCTGAAACTGACCATGATACTAAGTGGCAATCACACGT  
TGATTTTTCTCGACCAATCACAAAGACATCGGCACCCTCTATCTCGTATTTGGTGCCT  
GAGCCGGAATAGTGGGGACAGGCCTAAGTCTGCTCATTCGAGCAGAACTCAGCCAA  
CCCGGGGCTCTCCTGGGAGACGATCAAATTTATAACGTGATCGTTACCGCACACGCC  
TTTGTAAATAATCTTCTTTATAGTAATACCAATTATGATCGGAGGGTTCGGAAACTGA  
CTTATCCCACTAATGATCGGAGCCCCTGATATGGCTTTCCTCGGATAAATAACATG  
AGCTTCTGACTTCTACCCCCATCATTTCTTCTCCTCTTGGCCTCTTCAGGCGTAGAAG  
CCGGGGCTGGTACTGGTTGAACCGTGTATCCTCCCCTTGCTGGAAATCTGGCACACG  
CCGGAGCGTCCGTAGATCTCACAATTTTCTCTCTTCACCTTGCCGGAATTCATCAAT  
CCTGGGAGCAATCAACTTTATTACCACCATCATCAACATGAAACCTACGGCGGTAC  
TATATACCAAATCCCCTATTCTGTGTGAGCCGTAATAATTACGGCAGTTCTTCTTCTC  
CTTTCCTTCCGGTCTTAGCCGCTGGCATCACAATGCTACTAACAGACCGCAACCTA  
AACACAACCTTTCTTTGACCCTGCCGGAGGGGGTGATCCCATCCTCTACCAGCATCTA  
TTTTGATTCTTTGGTCACCCAGAGGTATACATTTTAATTCTTCTGCTTCGGAATGA  
TTTCTCACATTGTTGCATACTATGCAGGTAAGAAAGAACCCTTCGGCTACATAGGAA  
TAGTCTGGGCTATGATAGCTATTGGACTTCTGGGCTTCATCGTATGGGCCCCATCACA  
TGTTTACAGTTGGTATGGATGTGGACACACGTGCCTACTTTACTTCTGCCACAATAA  
TTATTGCCATCCCAACCGGCGTAAAAGTCTTTAGCTGACTCGCAACCCTCCATGGGG  
GAAGCATCAAGTGAGAAACCCCGCTTCTGTGGGCTCTAGGCTTTATTTTCCTATTTA  
CAGTGGGGGGCCTTACTGGCATTGTCTTAGCTAATTCCTCTCTCGACATCGTTCTCCA  
TGACACATACTATGTAGTAGCCCACTTCCATTATGTACTATCTATGGGTGCTGTATTT  
GCAATCGTTGCTGCCTTCGTACACTGATTCCCCCTATTACAGGCTACACCCTTCACT  
CCGCATGAACAAAAATCCACTTTGGCCTAATGTTTGTAGGAGTTAACCTCACATTCT  
TCCCCCAGCATTTTCTTGGCCTGGCCGGAATACCTCGACGGTACTCCGACTACCCGG  
ATGCATATACCCTTTGAAACACTGTCTCATCAATCGGGTCACTAATGTCCCTCGTTGC  
TGTAATTTTATTTTGTATTATTGAGAAGCATTTACAGCCAAACGAGAAGTCGG  
AGCAGTAGAACTTACTTCAACTAATATTGAATGACTTTACGGCTGCCCCCACCCTA  
CCACACATTTGAGGAGCCCGCATTCGTCCAAGTTCGTATAAACTAAATGGCACATCC  
GTCACAACCTGGGGTTTCAGGACGCAGCTTCCCCCCTAATAGAAGAACTACTTCACTT  
CCATGATCACGCCTTAATAATTGTTATTCTCATCAGCGCAATAGTACTTTATATTATT  
GTGGCAATGGTCACGGCCAACTAACCGACAAACTTGTCTTAGATTCTCAAGAAATT  
GAAGTAATCTGGACAGTTCTCCAGCTATTATTCTAATTCTCATCGCCCTCCCGTCTC  
TCCGCATTTTATATTTAATGGACGAAATTAACGACCCCCACCTAACAATTAAAGCGT  
TAGGCCACCAATGATACTGAAGCTACGAATACACAGACTACCAAGACCTTGGTTTTG  
ACTCCTACATGATTCCAACACAAGACCTAACCCCTGGTCAGTTCCGACTACTCGAAG  
CAGACCATCGAATAGTAATTCCTGTAGAATCCCCAATTCGAGTCCTTATCTCAGCTG  
AAGATGTTCTGCACTCCTGAGCAGTCCCCTCCCTGGGCGTGAAAGTTGATGCTGTGC  
CTGGACGACTAAACCAAGCAACCTTTATTGTTAGCCGACCAGGCGTATTCTACGGCC  
AATGCTCTGAGATTTGCGGGGGCAAACCATAGTTTTATACCCGTCGTTGTAGAGGCAG  
TCCCCTTGACCACTTTGAGGACTGGTCTTCGCTAATAATTGAAGACGCCTATGGCC  
CCTCAAGCGCACCCCTACCATATAGTCGACCCTAGCCCATGACCCCTCACGGGGGCT  
ATCGCTGCCCTATTGATAACATCTGGCCTTGCTATCTGATTCCACTTCCACTCTACCA  
CCCTAATAACTATCGGAACAATCCTTCTTATTTTGACAGTCTTCCAGTGATGACGAG  
ATGTCGTTTCGGGAGGGCACGTTTCAAGGACACCACACTCCCCCGTACAAAAAGGC  
CTCCGATACGGTATAATCCTATTTATTACCTCAGAAGTCCTATTTTTCTTAGGCTTCT  
TCTGGGCTTTTTACCACTCAAGCCTAGCACCTACCCCGACCTGGGCGGTTTCTGAC  
CACCCGCAGGCATTACCCCATAGACCCGTTTGAAGTCCCCTTCTTAACACAGCAG

TCCTTCTTGCCTCTGGCGTAACTGTTACATGAGCACATCACAGTATCATAGAAGGTG  
AGCGAAAACAAGCTATCCAATCTCTCGCTCTTACAATCTTGCTCGGTGGATACTTCA  
CCTTCCTCCAAGGCCTTGAATACCACGAAGCCCCCTTCACCATTGCAGACGGAGTTT  
ACGGTGCCACATTCTTTGTTGCAACCGGCTTCCACGGACTTCACGTCTTGGTTGGCTC  
CTCTTTTTTAGCCGTTTGTCTATTACGTCAAATCCTACACCATTTTACATCCGACCAC  
CATTTTGGCTTTGAGGCAGCCGCATGGTACTGACACTTTGTAGACGTCTGTCTGACTC  
TTCTCTATATCTCTATTTACTGATGAGGATCTTAATGGCCAACCTCCGTAAATCCCA  
CCCCCTTCTTAAAATCGCAAACGATGCTTTAGTCGACCTTCCAGCCCCCTCCAACAT  
CTCTGTCTGGTGAACTTCGGGTCTCTCTTAGGACTCTGTTTAGTGACCCAGATCGCT  
ACCGGCTTATTCTTAGCCATACACTATACATCAGATATTGCTACTGCCTTTACCTCTG  
TTGCACACATTTGCCGAGACGTCAACTACGGCTGACTTATCCGAAGCATTCATGCCA  
ATGGCGCATCATTCTTTTTCATTTGCATTTACCTCCATATCGGCCGTGGCCTATACTA  
TGGCTCCTACCTCTATAAGGAGACATGAACTATTGGTGTGTTCTACTTCTTCTAGTA  
ATAATGACCGCTTTCGTTGGATACGTCCTCCCTTGAGGACAAATGTCGTTTTGAGGT  
GCAACCGTCATTACCAACCTTCTGTCTGCGGTCCCCTATGTTGGAGGCTCCCTCGTCC  
AATGAATTTGGGGCGGCTTTTCTGTAGATAACGCCACCCTTACCCGATTCTTTGCATT  
CCACTTCCTTTTCCCATTCATCATCGCAGCCGCTACAGTGATTCATCTACTTTTCCTC  
CATGAAACTGGTTCAAATAACCCACCGGACTAAACTCAAACCTCCGATAAAGTCCC  
GTTCCACCCTTACTTCACGTACAAAGACCTTCTGGCTTTGCAGTCCTTCTTACTGCTC  
TGGCCTCCCTCGCTCTCTTCTCCCCAAATCTTTTAGGAGACCCTGACAACTTTACCCC  
TGCAAACCCGCTTGTTACACCCCCACACATCAAGCCCGAATGATACTTCCTATTTGC  
CTACGCCATTCTCCGCTCCATCCCAAACAAGCTTGAGGCGTACTTGCCCTGCTATT  
CTCTATCCTTGTTCTTATGCTTGTCCTTCCCTTACACTTCCAAACAGCGGAGCCTC  
ATGTTCCGCCCTATAACACAGTTTCTGTTCTGGTCTTTAGTAGCTGACGTAATAATTC  
TGACTTGAATTGGAGGGATACCCGTAGAGCACCCTTTCGTTATCATTGGCCAAGTAG  
CATCCCTTATCTACTTCTCCCTCTTCCTAGTCCTTATCCCAACAGCAGGCTGAATGGA  
AAACAAAGTCCTCGGATGAACTATGATTTCAACCCTCATTACGCATATTATTAACC  
CACTAGCCTTTATTGTCCCGGTCTTGTTAGCCGTAGCATTCCCTTACCCTCCTTGAACG  
AAAAGTGCTAGGCTACATACAACTCCGAAAAGGTCCTAACATCGTTGGGCCTTACG  
GCCTCCTTCAACCTATTGCTGACGGCGTAAACTCTTCATTAAAGAACCCGTCCGTC  
CTTCGACCTCCTCACCAGTTTTATTCTCTTATCACCCATGCTCGCACTTACACTGGC  
TCTTGCACTTTGAGCCCCATACCTTTCCCGTACCCCGTCGTGGACCTTAACCTAGGC  
ATTTTATTTATTCTAGCCCTGTCTAGCCTTGCGGTATACTCCATCCTCGGGTCAGGCT  
GAGCATCTAATTCAAAATATGCTCTAATGGGGGCACTGCGTGCTGTTGCACAAACAA  
TTTCTTACGAAGTTAGCCTGGGGCTCATCTTACTCAGCATCATTATCTTTGCAGGAGG  
CTTCACCCTCCAAACCTTTAATACAGCCCAAGAAGCTATTTGACTGGTAGTACCCGC  
CTGACCGCTCGCCGCCATGTGATACATCTCCACCCTTGCCGAAACAAACCGTGCACC  
CTTCGATCTAACGGAGGGGGAGTCTGAACTCGTCTCGGGCTTCAACGTAGAGTACGC  
AGGAGGACCTTTCGCTTTGTTCTTTTTAGCCGAATATTCAAACATTCTCCTAATAAAT  
ACACTGTCCGCAACACTATTTTTAGGCGCCTCACACATCCCAAACATCCCAGAACTA  
ACAAGTATTAACCTTAATAACTAAAGCAGCCCTTCTATCCGTTGTTTTTCTCTGAGTCC  
GAGCCTCGTACCCACGATTCCGTTACGACCAGCTTATGCACCTCATTTGAAAAAACT  
TTCTTCCATTAACACTGGCCCTGGTTATTTGACACTTAGCGCTCCCTATTGCATTCGC  
TGGCCTCCCACCTCAGCTGTAGATGAACCCCTACATCTTGTCACCCTTCTATTTGGT  
TTGGGCCTAGGTACAACACTCACATTTGCAAGCTCGCACTGACTTCTCGCGTGAATG  
GGCCTTGAGATTAATACTAGCCATTATCCCACTAATAGCGCAACACCACCACCCT  
CGGGCTGTGCAAGCCACTACTAAATACTTCCTAGCACAAGCCACAGCAGCCGCCAC  
CCTCCTATTTGCAAGCACCACCAACGCTTGATCACCAGGCGAGTGAGATATTCAACA

AATAACGCACCCCCTCCCCACGACAATGGTTGTAATTGCCCTCGCACTAAAAATCGG  
ACTAGCACCTATACACTCTTGACTCCCCGAAGTTCTTCAGGGCCTAAGCCTCACCAC  
CGGTCTTATTTTGTCAACCTGACAAAAGCTTGCACCTTTTGCTCTGCTACTACAAATT  
CAAACAACAATCCCACCCCTCTGATTATTATTGGCCTTCTCTCTGCACTTGTTGGGGG  
CTGAGGTGGCCTCAACCAAACCCAACTGCGCAAAGTCCTTGCCTATTCTCAATCGC  
TCACCTTGGCTGAATAATACTCATCCTTCAATTCTCACCCCTCCTGAGCCTCCTTGCA  
CTCCTAACATAATTTTCTATGACCTTTTCAGCCTTCCTCATCTTCAAGGTAAACAAGGC  
CACCCTGTCAACGCACTCGCGATCTCCTGAGCAAAAGCTCCCGCCCTCACAGCCCT  
AGCACCTCTCGTCTTACTTTCCCTGGGGGGTCTTCCACCACTAACAGGCTTTATACCA  
AAATGGTTTATTCTTCAGGAGCTAACTAAACAAGATCTGCCACGCTTGCTACCCTTG  
CTGCACTAACTGCCCTCTTAAGCCTTTACTTCTACCTACGCCTCTCGTATGCTATGAC  
CCTTACGATATTCCCGAATAACCTCGTTGGCATGACCCCTGACGATTTTCCACCCCC  
CAATTCCTCTCCCCCTCGCAGTTTCCACTGCAGCAACCACTCTTCTCCTGCCATTAG  
CACCTGCTGCCGTAGCACTCCTCGTCACCTATGAGCCTTCTTCTAACCATCATTTCAA  
TTACCACCCCTCCTTTCAACGGTACTTGCCATTGTGTCTTTCTGACTCCCCCAAATTAC  
GCCGGACTATGAAAACTGTCACCATACGAATGTGGCTTTGACCCCATTTGGTTCCGC  
CCGACTACCTTTTTCAATGCGATTTTTTCTCATCGCCATCCTCTTTCTCCTCTTCGACT  
TAGAAATTGCACTTCTTCTCCCCCTTCCCTGGGGTGACCAACTAGCCTCCCCCTACT  
TACCTTTACCTGAGCTGCAGCAGTCCTATCGCTTCTGACCCTTGGCCTCATCTACGAG  
TGAGTGCAAGGAGGCCTAGAATGAGCTGAATATGCTAAAGATTTTAATTCCAACAC  
TTATGTTAATTCCAACAGCCTGACTACTTAAGCCTAGCTGACTTTGACCCATAACTTT  
ATTGTATAGCTTCTGCATCTCCTTGATTAGCCTTTCATGATTAAAGAACCTCTCGGAA  
ACCGGCTGATCCTCACTCAACCTATTTATAGCCACCGACTCCTTATCAACACCCCTCC  
TTGTTCTAACATGTTGACTACTTCCCCTGATAATCCTAGCAAGCCAGAAACACACGG  
CCTCGGAACCCCTCGGTCGACAGCGCATGTATATTTCACTTCTCGCCTCCTCCAATTT  
TTCTGATTCTAGCATTTAGCGCCACAGAACTCGTGATATTCTACGTAATATTTGAA  
GCCACCCTCATTCCCACACTGATCATTATTACCGCTGAGGTAATCAAACAGAACGC  
CTAAATGCGGGGACCTACTTCCTCTTTTATACATTAGCAGGCTCACTTCCTCTTCTTG  
TTGCTTTACTTTTACTACAAAATACATCCGGAACCTCTCTCATTATTGACACTCCACTA  
TACGGACCCGCTTGCTGTCTATGTCAGACAAATTATGATGAGCCGGATGTCTCC  
TGGCTTTCCTCGTTAAAATACCACTTTATGGTGTTCACCTCTGACTCCCTAAAGCTCA  
CGTTGAAGCTCCAATTGCAGGCTCAATAATCCTTGCAGCGGTTTTACTTAAACTAGG  
GGGTTACGGCATAATCCGCATAATAACAATACTAGAACCCCTAACCAAAGAGTTAA  
GCTACCCCTTTATTATCTTTGCACTCTGAGGTGTAATCATAACTGGCTCGATTTGCCT  
ACGACAAACGGACCTCAAGTCGTTAATTGCCTACTCCTCTGTTAGCCACATAGGCCT  
CGTGGCCGGAGGGATTCTCATTCAATCACCTGAGGACTGACAGGAGCACTCACAC  
TTATAATTGCACACGGCCTTACTTCCTCCGCCTTATTCTGCCTAGCAAATACAACTA  
TGAACGAACTCATAGCCGCACTATGGTTTTAGCGCGAGGACTTCAAGTGGCCCTACC  
TCTAATAGCCACTTGATGATTCTCGAGTCTAGCCAACCTAGCCTTACCACCACT  
ACCTAACCTTATGGGGGAACCTAATAATTATTACCTCTCTTTTTGACTGATCCTGATGA  
ACGCTCGCACTTACAGGGTCCGGAACCTCTTATTACCGCTGGCTACAGCCTTTACATA  
TTCTTAATGACACAACGAGGCCCTCTCCCGACACATGTAATTGCGCTTGAACCCTCG  
CACACCCGAGAACATCTTCTTATTGCCTTACCTTATCCCTCTTGTTCTTCTTGTGCTT  
AAGCCCGAGCTGATCTGGGGTTGAACTGCCTATGACCCCAACACACTTTGCCTTCTC  
CTCAGCCTTTTTTCTAGGTTTAACAGGCCTGGCATTCCACCGGTCCCACCTCCTTTCC  
GCACTATTGTGTCTTGAAGGAATAATGTTGTCCCTGTTTGTGTCCTCTCCCTGTGAA  
CGCTGCAACTAGACTCAACTAACTTTTCAGCATCTCCACTACTTCTGCTTGCATTCTC  
AGCCTGTGAAGCAAGCGCCGACTAGCCCTTCTGGTAGCCACTGCCCCGAACCCACG

GAACTGACCGACTACAAAGCCTAAACCTCCTCCAATGCTAAATGCACCCCCACCTCCC  
TAATGATCTCATCAAGCTTGATTACAATCTTTGCATTACTAGCCTACCCACTGGTCAC  
CACGTTCCATCCTACGCCTCGAGGGCCTCAATGAGCTACATCCCATGTCAAAACAGC  
TGTA AAAATAGCTTTCTTTGTTAGCCTCTTACCCCTCGCCCTATTCCTTAATGAAGGC  
GCCGAGACGATTGTTACTAACTGAGCCTGAATAAACACTAACACTTTCAACATCAAC  
ATTAGCTTAAAATTTGACTTTTATTCGATTATTTTTACACCAATTGCTCTTTACGTTAC  
TTGGTCCATTCTAGAGTTCGCCTCATGATACATGCACGCTGATCCACACGTGAACCG  
CTTTTTTAAGTACCTTCTAACCTTTCTTATTGCTATAATTATTCTCGTAACTGCAAAC  
AACATATTTCAACTATTCATCGGATGAGAGGGGCGTGGGGATCATATCGTTCCCTCCTC  
ATCGGGTGGTGGTACGGACGAGCGGACGCTAATACTGCAGCACTTCAAGCAGTACT  
GTACAACCGAGTGGGGGATATTGGACTTATCTTCGCCATGGCCTGAATGGCAACAA  
ACCTAAACTCCTGGGAAATACAACAAATCTTTGCAACCTCTAAGGATATGGACTTAA  
CCTATCCCCTCATCGGACTAATCATCGCGGCAACCGGGAAGTCAGCTCAATTTGGGC  
TCCACCCTTGTTGCCCCTCAGCTATGGAAGGTCCTACACCGGTATCTGCCCTACTTCA  
CTCTAGCACTATGGTCGTAGCCGGCATCTTCCTGCTAGTGCGAATAAGCCCGCTTCT  
GGAGAATAACCCGGTCGCCCTCACAACCTGCCTCTGCCTCGGGGCCTTAACGACCCT  
GTTCACTGCAACCTGTGCCCTTACGCAAAATGACATTAAAAAAATCGTCGCATTTTC  
TACATCTAGCCAACCTAGGGCTCATAATGGTAACCATTTGGATTAAACCAACCACAAC  
AGCATTTCTACACATCTGTACACACGCCTTCTTTAAAGCCATGCTGTTTTCTTTGCTCG  
GGATCTATTATTCACAGCCTAAACGACGAACAGGACATCCGAAAAATGGGGGGCAT  
ACACCACCTTGCACCTTTTACATCTTCTTGCCCTAACAAATTGGCAGCCTCGCACTTACA  
GGAACCCCTTCTTAGCTGGTTTTCTTCTCTAAAGATGCCATCATCGAAGCATTAAAC  
ACCTCCCATTTAAACGCCTGAGCCCTAACCTAACCTCCTGGCCACATCTTTTACA  
GCAATCTACAGCTTCCGCGTAATTTTCTTTGTGCCTATGGGCCACCCCGATTCAACC  
CATCTCCCCTATTAACGAAAAACAACCCCGCAGTAATTAACCTCTTAAACGCCTAGC  
ATGAGGCAGTATTATCGCAGGACTCCTAATTACCTCAAATATTACACCCCTGAAAAC  
CCCTGTAATGTCCATGCCTCCCCTCCTAAACTAGCTGCCCTTGCGAGTTACAATCGTG  
GGCCTACTTGTTGCCATGGAAGTACCATATTAACCAATAAGCAATTTAAATCAACC  
CCTATCTTAACGTACACAACCTTCTCTAACATATTAGGGTTTTTCCCTGCCATTGTACA  
CCGCCTAACCCCTAAGCTAGGGCTCGTTCTTGGTCAGGACATCGCCAACCAGATGGT  
AGATCAAACCTGACTAGAGAAGGCAGGTCCCAAAGCCATTGTATCCTTCAATCTACC  
CTTAGTTTCTACAACAAGCAACATTCAACGAGGAATAATCAAAACCTATCTACCCTT  
TTCCTTTTAACTAGCCCTTATTGTGCGAACGTCCCTCGCACAATGGCTTTTGTTAT  
ATATTTTATTTTATTTTCTTCGTGCTAGGGTTAGTTGCAGTTGCTTCTAACCCGTCGC  
CCTACTATGCCGCTTATGGTTTAGTTGTGGTAGCTGGGATGGGGTGTAGTGTACTAA  
TTGGGCATGGGGCGCCTTTTTTGTCCATGATTTTATTTCTAATTTATCTGGGCGGGAT  
GTTGGTTGTATTTGCATTCGCAGTTGCGATGGCTTCTGAGCCGCATCCAGTTGGTTGG  
AATTCCTGGGCTGTGTTGGGTTACGCTTGTTTACATGGCAGCGGTAGTGCAGTTGCT  
GGGGCGCTCTGAGGGGGGTGATATGAATCGTCTTGGGTGACAGTAGATGGGTTTGG  
GGAGACTGAGGTATTTTCGGGGGGATCTCGGCGGGGTGGCCATGGTTTATGGCTCTG  
GGGGAGGGTTGTTGGTTATTAGTGCAGGGGTATTGCTTTTAAACGCTGCTTGTAGTGC  
TTGAGTTAGCCGGCCCATGTGCCGAGGGACGTTGCGACAATAA"/>

<sequence id="seq\_Hippoglossus\_hippoglossus\_AM7491221" spec="Sequence"  
taxon="Hippoglossus\_hippoglossus\_AM749122" totalcount="4"  
value="ATGATACTAAGCTTCTTTGACCAATTTATATCCCCTTCATACCTCGGCATTCC  
ACTAATTGCACTAGCGATTAGCCTGCCTTGAATTCTGTTCCCAACCCCTCAAGCCGC  
TGATTAAACAACCGCGTGCTAACACTTCAGGGGTGATTTATTAGCCGCTTCACCTCA  
CAACTTCTTCTACCCCTAAACCCTGGGGGCCACAAGTGGGCAGTTCTATTCACCTCG

TTAATGTTTTCTTTTCTATCAACATGCTAGGACTCCTTCCATACACCTTCACACCAA  
CAACCCAACTCTCCCTTAACATGGGCCTCGCAGTACCCCTTTGATTGGCAACTGTCA  
TTATGGGATACGAAATCAACCAACGCATGCCCTAGGCCACCTTCTTCCAGAAGGCAC  
CCCCACTGCCCTCATCCCTGTACTTATTATCATTGAAACAATTAGCCTATTCATTCTGA  
CCCTTAGCTCTCGGTGTCCGACTAACAGCAAATCTCACAGCAGGCCACCTCCTTATT  
CAACTCATTGCAACAGCTGCCTTCGTCCTTCTTCCCCTCATACCTGTTGTGCTATCT  
TAACAACGGTGGTCTCTTCTCCTCACTCTACTAGAAGTAGCCGTTGCCATGATTC  
AAGCTTATGTCTTTGTTCTACTCCTAAGCCTATACCTACAAGAGAACGTTTAATGCCT  
CAACTGAACCCCGCACCCCTGATTTGCAATTTTAGTTTTCTCTTGAATAATCTTTTTAA  
CTGTTATTCCCCCAAAGTTTTAGCACACACCTATCCCAATGAACCCACCTCCCAAA  
GCACACAAAAACAAAACAGAGCCCTGAAACTGACCATGATACTAAGTGGCAATCAC  
ACGTTGATTTTTCTCGACCAATCACAAAGACATCGGCACCCTCTATCTCGTATTTGGT  
GCCTGAGCCGGAATAGTGGGGACAGGCCTAAGTCTGCTTATTCGGGCAGAACTAAG  
CCAACCCGGGGCTCTCCTGGGAGACGACCAAATTTATAATGTGATCGTCACCGCACA  
CGCCTTTGTAATAATCTTTTTTATAGTAATACCCATTATGATTGGGGGGTTTCGGAAAC  
TGGCTTATTCCACTAATAATTGGGGCCCCAGACATGGCGTTCCCTCGAATGAATAAT  
ATGAGTTTCTGACTTCTTCCCCCTCCTTCTCCTCCTCTTAGCCTCTTCAGGTGTTGA  
AGCCGGAGCAGGTACCGGATGAACCGTGTACCCCCCACTAGCTGGCAATTTAGCCC  
ACGCCGGGGCATCCGTAGACCTGACAATCTTCTCACTTCACCTTGCAGGAATTTTCAT  
CAATTCTGGGGGCAATTAACCTTTATTACTACCATCATTAACATGAAACCCACAACAG  
TCACTATGTACCAAATCCCGTTATTTGTTTGAGCCGTTCTTATTACAGCCGTACTTCT  
TCTTCTGTCCCTGCCCGTTTTAGCCGCAGGGATTACAATGCTACTAACAGACCGCAA  
CCTTAACACGACCTTCTTTGACCCTGCCGGAGGAGGTGACCCCATTTCTTACCAACA  
CCTATTCTGATTCTTTGGCCACCCAGAGGTATACATTCTTATCCTCCCAGGCTTCGGA  
ATAATTTCTCACATTGTTGCATACTATGCAGGTAAGAAAGAACCTTTTGGCTACATG  
GGGATAGTCTGAGCTATAATGGCCATTGGACTCCTGGGCTTCATTGTCTGGGCCCCAT  
CACATATTTACAGTCGGAATAGACGTAGATACACGAGCCTACTTTACCTCTGCCACA  
ATAATCATTGCGATTCCAACCTGGCGTAAAAGTCTTTAGCTGACTCGCAACCCTCCAT  
GGGGGAAGCATTAAATGAGAAACGCCCTTCTATGAGCCCTCGGCTTTATTTTCCTC  
TTTACAGTAGGCGGTCTCACTGGCATTGTCTTAGCTAACTCCTCTCTCGATATTGTTT  
TGCATGACACATACTATGTAGTCGCCCACTTCCACTATGTACTATCTATGGGTGCTGT  
ATTTGCAATCGTTGCCGCCTTCGTCCATTGATTTCCGTTATTTACAGGCTATACCCTT  
CACTCCACATGAACAAAAATCCACTTCGGCCTGATGTTTATTGGGGTCAATCTAACA  
TTCTTCCCTCAACATTTTCTGGGCCTGGCTGGGATACCCCGACGGTACTCAGACTAC  
CCAGACGCATACACCCTTTGAAACACTGTTTCATCAATTGGGTCCCTAATGTCCCTC  
GTTGCTGTAATTTTATTCTTATTTCATTATTTGAGAAGCATTTACAGCCAAACGAGAA  
GTCGGAGCAGTAGAACTAACTGCAACTAACATTGAATGACTTTACGGCTGCCCTCCC  
CCCTACCACACATTTGAAGAGCCCGCATTTCGTACAAGTTCGTATAAACTAAATGGCA  
CATCCCTCACAACTCGGATTTCAAGACGCAGCTTCACCCTTAATAGAAGAACTACTT  
CACTTCCACGACCACGCCTTAATAATTGTAATTCTCATTAGCACAAATGGTACTTTATA  
TTATTGCGGCTATAGTCACAGCCAACTAACAGATAAACTTGTACTAGACTCTCAAG  
AAATTGAAATTATCTGAACAGTTCTCCAGCTGTTATTCTTATCCTTATCGCCCTACC  
ATCCATCCGAATTTTGTACTTAATAGACGAAATTAATGACCCCCACCTTACAATCAA  
AGCCATCGGCCACCAATGATACTGAAGCTACGAATACACAGACTACGAAGACCTCG  
GTTTTGACTCATACATAATCCCCACACAAGACCTGACCCCCGGACAATTCCGACTAC  
TAGAAGCAGACCACCGAATAGTAATCCCAGTAGAATCTCCAATTTCGCGTTTTAATCT  
CGGCTGAAGATGTCTTACATTCTTGGGCAGTCCCCTCTCTAGGCGTAAAAGTTGACG  
CCGTACCTGGACGATTGAACCAAGCAACCTTTATTGTTAGCCGACCAGGCGTATTTT

TCGGACAATGTTCTGAAATTTGCGGGGCTAACCATAGTTTTATACCCATTGTTGTAG  
AAGCAGTCCCCCTTGAACACTTTGAGAAGTGGTCTTCACTAATAATTGAAGACGCCT  
ATGGCCCATCAAGCACACCCATACCACATAGTCGACCCCAGCCCATGACCCCTAAC  
AGGGGCTATTGCTGCCCTATTGATAACATCTGGCCTTGCTATCTGATTCCACTTCCAC  
TCCACAACCCTAATAACTATTGGGACAATCCTTCTCACCTTAACAATCTTCCAATGA  
TGACGGGACGTCGTACGAGAAGGCACATTTCAAGGACACCACACTCCCCCGTTCA  
AAAAGGCCTCCGATATGGGATAATTTTATTTATTACCTCAGAAGTCCTATTCTTCTTA  
GGCTTCTTCTGAGCCTTTTACCCTCAAGCCTAGCACCTACCCCTGAGCTAGGCGGC  
TTCTGACCACCAGCAGGCATTACTCCCTTAGACCCATTTGAAGTCCCCTTCTTAAC  
ACAGCAGTCCTGCTCGCCTCTGGCGTAAGTGTACCTGAGCACATCACAGCATTATG  
GAGGGTAAACGAAAACAACTATTCAATCTCTTGCTCTTACAATCTTACTCGGGGGG  
TACTTCACTTTCCTTCAAGGCCTAGAGTATCACGAAGCCCCCTTACCATTGCAGAC  
GGAGTTTACGGCGCTACATTCTTTGTTGCCACCGGCTTCCACGGATTACACGTCTTA  
ATTGGCACATCATTCTTAGCCGTTTGTCTATTACGCCAGATTCTTACCATTTCACAT  
CAAACCACCACTTTGGGTTTGAAGCAGCCGCATGATACTGACACTTCGTAGACGTCG  
TCTGACTTTTCCTCTATATCTCTATTTACTGATGAGGATCTTAATGGCCAGTCTACGT  
AAATCCCACCCTCTTCTAAAAATCGCAAACGATGCTTTAGTCGACCTCCCCGCCCCC  
TCTAATATCTCGGTTTGATGGAACCTTGGGTCTCTTTTAGGACTCTGTTTAATTACCC  
AAATTGCGACCGGCTTATTTCTAGCCATACACTACACATCAGACATTGCTACTGCCT  
TCACCTCCGTGGCCACATCTGTCGAGACGTCAACTACGGCTGACTTATCCGAAGCA  
TTCATGCCAACGGCGCATCATTCTTTTTCATTTGCCTCTACCTTCATATTGGCCGAGG  
ACTATACTATGGCTCTTACCTCTATAAAGAAACATGAAGTGTGGGGTTATTCTTCTC  
CTTCTCGTAATAATAACAGCCTTCGTTGGATACGTCCTCCCTTGAGGACAAATGTCTG  
TTTTGAGGTGCAACCGTTATTACCAACCTTCTATCTGCCGTCCCCTACGTCGGAAAC  
ACCCTAGTCCAATGAATCTGAGGGGGTTTTTCTGTAGACAATGCTACCCTCACCCGG  
TTCTTTGCCTTCCACTTTCTCTTCCCCTTCATCATCGCTGCCGCAACATTAATTCATCT  
ACTCTTTCTTCACGAGACTGGCTCAAACAACCCACCGGGCTAAACTCAGACTCCGA  
CAAAGTTCCCTTTCACCCCTACTTCACTTACAAAGACCTCTTGGCTTTGCAGTACTTC  
TACTGCATTAGCATCCCTAGCCCTATTTTCCCCAAATCTCTTAGGAGACCCAGATA  
ACTTTACCCCTGCAAATCCGCTTGTTACTCCCCCACACATTAAGCCAGAGTGATACT  
TCCTGTTTGCCTATGCTATTCTACGCTCCATTCCAAACAACTTGGAGGAGTACTTGC  
CCTTTTATTCTCCATCTTAGTTCTTATGCTCGTCCCTTTCCTTCATACCTCTAAACAAC  
GAAGCCTAATATTCCGTCCCCTAACACAATTCTTGTTTTGGTCTTTAGTAGCAGACGT  
TATGATTCTAACTTGAATTGGAGGGGATGCCCGTAGAACACCCCTTCGTCATCATTGG  
ACAAGTAGCGTCTCTCCTCTACTTCTCCCTCTTCCTAGTCCTGATCCCAACAGCAGGT  
TGACTAGAGAATAAAGTCCTTGGATGAAAATATGATTTCAACTCTCATTACTCATAT  
TATCAACCCACTAACCTTTATTGTGCCTGTATTGCTAGCCGTAGCATTCCCTCACCCCTC  
CTTGAACGAAAAGTGCTAGGCTACATACTACGAAAAGGGCCAAACATTGTTGG  
GCCTTACGGCCTCCTTCAACCTATTGCTGATGGCGTAAACTCTTTATTAAAGAACC  
CATTCGACCTTCAACCGCATCACCCGTCTTATTCCTCGTGGCCCCCTATGCTCGCTCTC  
ACACTAGCCCTAACCTTTGAGCCCCCATACTTTCCCGTACCCTGTCGTGGACCTTA  
ACCTAGGTATTTTATTTATTCTAGCTCTATCTAGCCTTGCAGTATATTCTATTCTGGG  
CTCCGGCTGAGCATCTAATTCAAAATATGCCCTAGTAGGGGCACTGCGGGCTGTCTGC  
ACAAACGATTTCTTACGAAGTTAGCCTTGGACTCATCTTACTAAACATTATCATCTTC  
ACCGGGGGCTTCACACTCCAAACCTTTAACACAGCCCAAGAGGCCATTTGACTGGTA  
GTGCCCGCTTGACCGCTGGCTGCCATATGATATATCTCCACTCTTGCCGAAACAAAC  
CGTGACCCCTTCGACTTAACAGAAGGAGAATCTGAAGTGTCTCGGGCTTCAACGTA  
GAGTACGCAGGGGGACCCTTCGCCTTGTTCTTCTTAGCCGAATATTCAAATATTCTC



CTAATAAATACCCTGTCCGCTACACTATTTTTAGGGGCCTCCCACATCCCATCTATCC  
CGGAATTAAGTAGTATTAATATTATGACTAAAGCAGCCCTTCTATCAATTGTCTTCCT  
GTGGGTCCGGGCTTCGTACCCGCGATTCCGTTACGACCAACTTATGCACCTCATTG  
AAAAAACTTTCTTCCACTGACTTTGGCACTAGTTATCTGACACTTGGCGCTCCCTATT  
GCATTGCTGGTCTCCCACCACAGCTATAGATGAACCCCTACATCTTGACCACTCTT  
CTATTTGGTTTGGGCCTTGGAACAACACTCACGTTTGCAAGCTCACACTGGCTCCTC  
GCTTGAATAGGACTTGAGATTAATACACTAGCCATTATTCCCCTAATAGCCCAACAC  
CACCACCCCGGGCAGTCGAAGCTACTACTAAATACTTTCTCGCACAAGCCACAGCA  
GCCGCCACCCTCCTGTTTGCAAGCACTACCAACGCTTGACTCACAGGCCAGTGGGAT  
ATTCAACAGATAACACATCCCCTCCCCACAACAATGATTGTTATTGCCCTCGCGCTA  
AAGGTCGGACTGGCACCAATGCACTCTTGACTCCCCGAAGTACTCCAAGGGCTAGA  
CCTGACCACCGGGCTCATCCTCTCAACCTGACAAAACTTGACCCCTTTGCCCTCTT  
ACTACAGATTCAGACAACAACCCTACGCCTCTAATCATTATTGGCTTACTATCCACT  
CTCGTTGGTGGCTGAGGTGGTCTCAACCAAACCCAGCTGCGCAAGGTCTCGCCTAC  
TCCTCAATTGCCACCTTGCTGAATAATGCTGATCCTTCAATTTTCACCCCTCCTTG  
CCCTTCTCACCCCTCCTCACGTACTTTCTATGACTTTCTCAGCATTCTTAATTTTTAAAG  
TAAACAAAGCGACCACCGTCAATGCCCTCGCCATCTCGTGAACAAAACTCCTGCCC  
TCACAGCCCTAGCACCCCTGGTTTTACTTTCTCTCGGCGGCCTTCTCCCCTTACCGG  
CTTCATGCCCAAGTGATTCATTCTTCAGGAAGTACTAAACAAGACCTTCCGCACTT  
GCCACCCTCGCCGCTTTAACTGCCCTCTTGAGTCTCTACTTCTACTTGCGCCTCTCGT  
ATGCAATAACCCCTCACAATATTCCCCAACAACTAATTGGTGTCACTCCCTGACGAT  
TCTACTCCCCCAATTTACACTTCCCCTCGCCGTCTCCACTGCAGCAACCACCCTTCT  
TCTCCCACTAGCCCCCGCTGCCGTAGCACTACTGGTCACCTATGAGCCTTCTCCTAAC  
CATCATTTTCGATTGCCACCCTCCTCTCGACAGTACTAGCCCTTGTATCCTTTTGATTA  
CCCCAAATTACACCAGACCACGAAAAGCTATCGCCGTACGAGTGGCGCTTTGACCC  
GATAGGATCCGCCCCGGCTGCCTTTTTCACTGCGGTTTTTCTCATCGCCATCCTCTTT  
CTTCTCTTCGATTTAGAAATTGCTCTCCTCCTCCTCCTTCCATGAGGAGACCAACTAG  
CATCGCCACTACTGACGTTACCTGAGCTACAGCTGTCCTAGCCCTTCTAACCCTCG  
GCCTCATTTACGAATGAATGCAAGGAGGTCTAGAATGGGCTGAATATGCTAAAAGT  
CCTAATCCCAACACTTATGCTAATCCCAACAGCCTGGTTACTCAAACCCAGCTGACT  
CTGGCCCATGACTTTAATGTATAGCTTTTGCACTCTCCTTGGTTAGCCTTTCATGACTA  
AAGAACCTCTCAGAAACCGGCTGATCGTCACTTAGCCTCTTTATAGCTACCGACTCC  
CTATCAACCCCCCTCCTCGTTCTTACATGCTGATTACTCCCACTAATAATTTTGGCAA  
GCCAAAAACACACAGCCTTAGAACCTCTTAGTCGCCAGCGCATGTACATCACACTTC  
TCGCCTCCTCCAGTTTTTCCTAATCCTAGCATTTAGCGCCACCGAACTGGTGATGTTT  
TACGTAATATTTGAAGCCACCCTCATCCCCACGCTAATCATTATCACCCGCTGAGGA  
AACCAAACAGAACGTCTAAACGCAGGAACCTACTTTCTCTTCTATACATTAGCGGGC  
TCACTCCCTCTTCTCGTTGCTTTACTCCTACTCCAAAACACATCCGGCACCCCTGTCGC  
TGTTAACCCTTCACTATACGGACCCGCTCGCTCTCGTCTTATGCAGACAACTATGA  
TGAGCAGGCTGTCTTTTAGCATTCTGTTAAAATAACCCCTCTACGGGGTCCACCTA  
TGGCTCCCTAAAGCCCATGTTGAAGCCCCAATTGCAGGCTCAATAATCCTTGCAGCG  
GTTCTACTGAAGCTAGGGGGATACGGCATAATCCGCATAATAACAATATTGGAACC  
TCTAACTAAGGAGTTAAGCTACCCCTTCATTGTCTTTGCACTTTGAGGGGTAAATTATA  
ACTGGGTCAATTTGTCTACGCCAGACAGACCTTAAGTCCCTAATTGCCTACTCCTCA  
GTCAGCCACATAGGCCTAGTGGCTGGAGGAATTCTTATCCAATCACCCCTGGGGCTTA  
ACAGGGGCTCTTACCCTCATAATTGCACACGGGCTTACTTCATCAGCCCTCTTCTGCT  
TAGCAAACACAACTATGAACGAACCCACAGTCGAACGATAGTCCTGGCGCGAGGA  
CTTCAAGTAGCCCTACCACTAATAGCCACTTGATGATTTATTTCTAGCTTGGCCAACC

TAGCTCTGCCACCACTACCCAACCTCATGGGGGAGCTGATAATTATCACTTCTTTATT  
CAACTGGTCCTGATGAACTCTGGCATTAAACCGGTGCAGGCACTCTAATCACAGCTGG  
TACTCCCTTTACATATTCTTAATAACTCAGCGGGGCCCTCTCCCAACACATGTCATT  
GCACTTGAGCCATCTCACACCCGAGAACACCTTCTTATTGCCTTCACCTCATCCCCTT  
AATTCTACTCGTACTTAAGCCCCGAGCTGATCTGAGGCTGAACTGCCTATGACCCCCA  
CACACTTTGCCTTCTCCTCAGCCTTTCTTCTGGGTTTAACAGGCCTGGCATTCCACCG  
GTTTCACCTCCTTTCCGCCCTATTGTGCCTTGAAGGAATAATACTATCCCTATTTATT  
GCTCTCTCCCTATGAACGCTCCAACCTTGACTCAACCAACTTTTCAGCATCTCCAATAC  
TTCTGCTTGCATTTTTCAGCCTGCGAAGCAAGCGCCGGCCTCGCCCTATTAGTAGCCA  
CTGCTCGAACCCACGGGACCGACCGATTACAAAGCCTAAATCTTCTCCAATGCTAAA  
TGTACCCACCTCCCTAATGATTTTCATCGAGCCTGATCACAATCTTTGCGTTACTAGC  
CTATCCTTTAATCACCACGATCCGCCCTACACCTCGGGACCCTCAATGGGCTACCAC  
CCATGTCAAAACAGCTGTAAAAATAGCTTTCTTTGTTAGTCTGCTGCCTCTGACCCTA  
TTTCTTAATGAGGGGCGCAGAAACAATCGTTACTAACTGAACCTGAATAAATACCAAC  
TCCTTCAATGTCAGCATTAGCTTGAAATTTGATTTCTACTCAATTATTTTTACACCCA  
TTGCCCTCTACGTAACCTTGATCCATCCTGGAGTTCGCATCATGGTATATGCACGCAG  
ACCCACACATGAACCGCTTCTTTAAGTACCTCCTGACGTTTCTGATTGCCATAATCGT  
CCTAGTAACTGCAAACAATATGTTTCAACTATTTATCGGTTGAGAGGGCGTGGGGAT  
CATATCGTTCTTACTTATTGGATGGTGGTTCGGACGGGCGGATGCTAACACTGCAGC  
GCTTCAAGCAGTACTTTACAACCGAGTAGGGGACATCGGGCTTATCTTCGCCATGGC  
TTGAATAGCAGCAAACCTAAACTCCTGGGAGATGCAACAAATCTTTGCAACCACCA  
AAGACATAGACTTAACCTACCCTCTTCTCGGACTCATCATTGCAGCAACTGGCAAAT  
CGGCTCAATTCGGACTTCACCCTTGACTACCCTCCGCTATGGAGGGTCCCACACCGG  
TCTCTGCCCTACTTCATTCTAGCACTATGGTCGTTGCCGGCATTTTTTCTGCTAGTACG  
AATAAGCCCGCTACTGGAAAACAACCAAACCGCCCTCACAACTGCCTATGCCTCG  
GAGCTCTTACAACACTATTCACTGCAACCTGTGCCCTCACGCAAAATGATATTAAAA  
AAATCGTCGCATTCTCTACATCCAGCCAGCTTGGGCTTATAATGGTAACCATTGGTC  
TAAACCAGCCACAACCTAGCATTTCTTCACATCTGTACACATGCCTTCTTCAAGGCCA  
TACTATTTTTATGCTCCGGATCTATTATCCACAGCCTAAATGATGAACAAGATATCC  
GGAAAATAGGGGGCATAACCCACCTTGCACCTTTCACATCCTCTTGCCTAACTATTG  
GCAGCCTCGCCCTCACAGGAACCCCTTCTTGGCTGGCTTCTTCTCTAAAGATGCCA  
TCATCGAAGCATTAAACACATCCCACCTAAACGCCTGAGCCCTAACCTTAACCCTCC  
TAGCCACCTCTTTCACAGCAATCTACAGCTTTCGAGTAGTATTTTTGTACCCATGGG  
CCACCCCGATTAGTCCCTCTCTCCGATCAACGAAAACAACCCAGCAGTGATTAAC  
CCACTTAAGCGACTAGCATGGGGGAGTATCGTTGCAGGCTTACTAATTACCTCTAAT  
ATTACACCTTGAAAACCCCTGTCATATCTATACCTCCCCTCCTTAACTAGCTGCTC  
TTGCAGTCACAATCATCGGCCTTCTTGTTGCTATAGAGCTCGCCATGTTAACCAACA  
AACAAATATGAGCCAATACCCAACACGACATACACCCTTCTCTGCCTTATTAGGCTT  
CTTCCCCGGGGTTATACACCGCCTAACCCCTGTATTGCTCTTCTTCTAGGCCAAAAC  
ATTGCTAACCAACAGTAGATCAGACATGATTAGAAAAAACGGGCCCCAAAGCCAT  
TGAAGCCGCTAACCGACCTCTCGTCTCCTCTACAAGTAACATTCAACGGGGGGTAAT  
CAAAACATATCTCCCCTCTTCTCCTTACACTAGCCCTTATAATCCCCCTATTCATCA  
CCTAATGACTTTCGCTATATATTTAGTTTTATTTTCTCTTGTGTTGGGGTTAGTTGCAG  
TTGCTTCTAATCCGTCCCCTTATTTTGCTGCTTTGGGTTTGGTTGTGGTAGCTGGCAT  
GGGGTGTGGTATATTAGTCGGGCATGGAGGGCCCTTTTTGTCACTAGTCTTGTTCTTA  
ATTTACTTAGGCGGGATGTTAGTTGTATTTGCATATTCAGCAGCGTTAGCTGCTGAG  
CCGTACCCAGAGAGCTGGGGTAGTTGGTCGGTAATGGTATACGGTTGTCTACACAG  
GGGGAGTATTATAGTTTCCGGGCTGTTTTGAGGGGGGTGGTATGAATCTTCTTGGGT

TCTAGCAGATGAGTTAGGGGAGTTTTCCGTGTTTCGAGGTGATATTGGAGGGGTAGC  
CTTAATATACTCTTCTGGGGGGTGGTTGTTAATTACTAGTGCATGGGTATTGCTTTTA  
ACTTTATTTGTAGTCCTTGAGTTAACCAGGGGTATGAGTCGAGGGGGCGTTGCGACGGT  
TT"/>

<sequence id="seq\_Hippoglossus\_hippoglossus\_AM7491231" spec="Sequence"  
taxon="Hippoglossus\_hippoglossus\_AM749123" totalcount="4"  
value="ATGATACTAAGCTTCTTTGACCAATTTATATCCCCTTCATACCTCGGCATTCC  
ACTAATTGCACTAGCGATTAGCCTGCCTTGAGTTCTGTTCCCAACCCCTCAAGCCGC  
TGATTAAACAACCGCGTGCTAACACTTCAAGGGTGATTTATTAGCCGCTTCACCTCA  
CAACTTCTTCTACCCCTAAACCCTGGGGGGCCACAAGTGGGCAGTTCTATTACCTCG  
TTAATGTTTTCTTTTCTATCAACATGCTAGGACTCCTTCCATACACCTTCACACCAA  
CAACCCAACTCTCCCTTAACATGGGCCTCGCAGTACCCCTTTGATTGGCAACTGTCA  
TTATGGGATACGAAATCAACCAACGCATGCCCTAGGCCACCTTCTTCCAGAAGGCAC  
CCCCACTGCCCTCATCCCTGTACTTATTATCATTGAAACAATTAGCCTATTTCATTGCA  
CCCTTAGCTCTCGGTGTCCGACTAACAGCAAATCTCACAGCAGGCCACCTCCTCATT  
CAACTCATTGCAACGGCTGCCTTCGTCCTTCTTCCCCTCATACCTGTTGTGCTATCT  
TAACAACGGTGCTCCTCTTCCCTCCTCACTCTACTAGAAGTAGCCGTTGCCATGATTC  
AAGCTTATGTCTTTGTTCTACTCCTAAGCCTATATCTACAAGAGAACGTTTAATGCCT  
CAACTGAACCCCGCACCCCTGATTTGCAATTTTAGTTTTCTCTTGAATAATCTTTTTAA  
CTGTTATTCCCCCAAAGTTTTAGCACACACCTATCCCAATGAACCCACCTCCCAAA  
GCACACAAAAACAAAACAGAGCCCTGAAACTGACCATGATACTAAGTGGCAATCAC  
ACGTTGATTTTTCTCGACCAATCACAAAGACATCGGCACCCTCTATCTCGTATTTGGT  
GCCTGAGCCGGAATAGTGGGGACAGGCCTAAGTCTGCTTATTCGGGCAGAACTAAG  
CCAACCCGGGGCTCTCCTGGGAGACGACCAAATTTATAATGTGATCGTCACCGCACA  
CGCCTTTGTAATAATCTTTTTTATAGTAATACCCATTATGATTGGGGGGTTCGGAAAC  
TGGCTTATTCCACTAATAATTGGGGCCCCAGACATGGCGTTCCCTCGAATGAATAAT  
ATGAGTTTCTGACTTCTTCCCCCTCCTTTCTCCTCCTCTTAGCCTCTTCAGGTGTTGA  
AGCCGGAGCAGGTACCGGATGAACCGTGTACCCCCCACTAGCTGGCAATTTAGCCC  
ACGCCGGGGCATCCGTAGACCTGACAATCTTCTCACTTCACCTTGCAGGAATTTTCAT  
CAATTCTGGGGGCAATTAACCTTTATTACTACCATCATTAACATGAAACCCACAACAG  
TCACTATGTACCAAATCCCGTTATTTGTTTGAGCCGTTCTTATTACAGCCGTACTTCT  
TCTTCTGTCCCTGCCCGTTTTAGCCGCAGGGATTACAATGCTACTAACAGACCGCAA  
CCTTAACACGACCTTCTTTGACCCTGCCGGAGGAGGTGACCCCATTTCTTACCAACA  
CCTATTCTGATTCTTTGGCCACCCAGAGGTATACATTCTTATTCTCCCAGGCTTCGGA  
ATAATTTCTCACATTGTTGCATACTATGCAGGTAAGAAAGAACCTTTTGGCTACATG  
GGGATAGTCTGAGCTATAATAGCCATTGGACTCCTGGGCTTCATTGTCTGGGCCCCAT  
CACATGTTTACAGTCGGAATAGACGTAGATACACGAGCCTACTTTACCTCTGCCACA  
ATAATCATTGCGATTCCAACCTGGCGTAAAAGTCTTTAGCTGACTCGCAACCCTCCAT  
GGGGGAAGCATTAAATGAGAAACGCCCTTCTATGAGCCCTCGGCTTTATTTTCCTC  
TTTACAGTAGGCGGTCTCACTGGCATTGTCTTAGCTAACTCCTCTCTCGATATTGTTT  
TGCATGACACATACTATGTAGTCGCCCACTTCCACTATGTACTATCTATGGGTGCTGT  
ATTTGCAATCGTTGCCGCCTTCGTCCATTGATTTCCGTTATTTACAGGCTATACCCTT  
CACTCCACATGAACAAAAATCCACTTCGGCCTGATGTTTATTGGGGTCAATCTAACA  
TTCTTCCCTCAACATTTTCTGGGCCTGGCTGGGATACCCCGACGGTACTCAGACTAC  
CCAGACGCATACACCCTTTGAAACACTGTTTCATCAATTGGGTCCCTAATGTCCCTC  
GTTGCTGTAAATTTTATTCTTATTTCATTATTTGAGAAGCATTTACAGCCAAACGAGAA  
GTCGGAGCAGTAGAACTAACTGCAACTAACATTGAATGACTTTACGGCTGCCCTCCC  
CCCTACCACACATTTGAAGAGCCCCGCATTCGTACAAGTTCGTATAAACTAAATGGCA

CATCCCTCACAACTCGGATTTCAAGACGCAGCTTCACCCTTAATAGAAGAACTACTT  
CACTTCCACGACCACGCCTTAATAATTGTAATTCTCATTAGCACAAATGGTACTTTATA  
TTATTGCGGCTATAGTCACAGCCAACTAACAGATAAACTTGTACTAGACTCTCAAG  
AAATTGAAATTATCTGAACAGTTCTCCAGCTGTTATTCTTATCCTTATCGCCCTACC  
ATCCATCCGAATTTTGTACTTAATAGACGAAATTAATGACCCCCACCTTACAATCAA  
AGCCATCGGCCACCAATGATACTGAAGCTACGAATACACAGACTACGAAGACCTCG  
GTTTTGACTCATACATAATCCCCACACAAGACCTGACCCCTGGACAATTCCGACTAC  
TAGAAGCAGACCACCGAATAGTAATCCCAGTAGAATCTCCAATTCGCGTTTTAATCT  
CGGCTGAAGATGTCTTACATTCCCTGGGCAGTCCCCTCTCTAGGCGTAAAAGTTGACG  
CCGTACCTGGACGATTGAACCAAGCAACCTTTATTGTTAGCCGACCAGGCGTATTTT  
TCGGACAATGTTCTGAAATTTGCGGGGCTAACCATAGTTTTATACCCATTGTTGTAG  
AAGCAGTCCCCCTTGAACACTTTGAGAACTGGTCTTCACTAATAATTGAAGACGCCT  
ATGGCCCATCAAGCACACCCATACCACATAGTCGACCCCAGCCCATGACCCCTAAC  
AGGGGCTATTGCTGCCCTATTGATAACATCTGGCCTTGCTATCTGATTCCACTTCCAC  
TCCACAACCCTAATAACTATTGGGACAATCCTTCTCACCTTAACAATCTTCCAATGA  
TGACGGGACGTCGTACGAGAAGGCACATTTCAAGGACACCACACTCCCCCGTTCA  
AAAAGGCCTCCGATATGGGATAATTTTATTATTACCTCAGAAGTCCTATTCTTCTTA  
GGCTTCTTCTGAGCCTTTTACCCTCAAGCCTAGCACCTACCCCTGAGCTAGGCGGC  
TTCTGACCACCAGCAGGCATTACTCCCTTAGACCCATTTGAAGTCCCCTTCTTAAC  
ACAGCAGTCCTGCTCGCCTCTGGCGTAACTGTTACCTGAGCACATCACAGCATTATG  
GAGGGTAAACGAAAACAACTATTCAATCTCTTGCTCTTACAATCTTACTCGGGGGG  
TACTTCACTTTTCTTCAAGGCCTAGAGTATCACGAAGCCCCCTTACCATTGCAGAC  
GGAGTTTACGGCGCTACATTCTTTGTTGCCACCGGCTTCCACGGATTACACGTCTTA  
ATTGGCACATCATTCTTAGCCGTTTGTCTATTACGCCAGATTCTTCACCATTTCACAT  
CAAACCACCACTTTGGGTTTGAAGCAGCCGCATGATACTGACACTTCGTAGACGTCG  
TCTGACTTTTCTCTATATCTCTATTTACTGATGAGGATCTTAATGGCCAGTCTACGT  
AAATCCCACCCTCTTCTAAAAATCGCAAACGATGCTTTAGTCGACCTCCCCGCCCCC  
TCTAATATCTCGGTTTGATGGAACCTTTGGGTCTCTTTTAGGACTATGTTTAATTACCC  
AAATTGCGACCGGCTTATTTCTAGCCATACACTACACATCAGACATTGCTACTGCCT  
TCACCTCCGTGGCCACATCTGTCTGAGACGTCAACTACGGCTGACTTATCCGAAGCA  
TTCATGCCAACGGCGCATCATTCTTTTTTCATTTGCCTCTACCTTCATATTGGCCGAGG  
ACTATACTATGGCTCTTACCTCTATAAAGAAACATGAACCTGTTGGGGTTATTCTTCTC  
CTTCTCGTAATAATAACAGCCTTCGTTGGATACGTCCTCCCTTGAGGACAAATGTCTG  
TTTTGAGGTGCAACCGTTATTACCAACCTTCTATCTGCCGTCCCCCTACGTCGGAAC  
ACCCTGGTCCAATGGATCTGAGGGGGTTTTTCTGTAGACAATGCTACCCTCACCCGG  
TTCTTTGCCTTCCACTTTCTCTTCCCCTTCATCATCGCTGCCGCAACATTAATTCATCT  
ACTCTTTCTTCACGAGACTGGCTCAAACAACCCACCGGACTAAACTCAGACTCCGA  
CAAAGTTCCCTTTCACCCCTACTTCACTTACAAAGACCTCTTGGCTTTGCAGTACTTC  
TACTGCATTAGCATCCCTAGCCCTATTTTCCCCAAATCTCTTAGGAGACCCAGATA  
ACTTTACCCCTGCAAATCCGCTTGTTACTCCCCACACATTAAGCCAGAGTGATACT  
TCCTGTTTGCCTATGCTATTCTACGCTCCATTCCAAACAACTTGGAGGAGTACTTGC  
CCTTTTATTCTCCATCTTAGTTCTTATGCTCGTCCCTTTCCTTCATACCTCTAAACAAC  
GAAGCCTAATATTCCGTCCCCTAACACAATTCTTGTTTTGGTCTTTAGTAGCAGACGT  
TATGATTCTAACTTGAATTGGAGGGATGCCCGTAGAGCACCCCTTCGTCATCATTGG  
ACAAGTAGCGTCTCTCCTTTACTTCTCCCTCTTCCTAGTCCTGATCCCAACAGCAGGT  
TGACTAGAGAATAAAGTCCTTGGATGAAAATATGATTTCAACTCTCATTACTCATAT  
TATCAACCCACTAACCTTTATTGTGCCTGTATTGCTAGCCGTAGCATTCCTCACCCCTC  
CTTGAACGAAAAGTGCTAGGCTACATACAACTACGAAAAGGGCCAAACATTGTTGG

GCCTTACGGCCTCCTTCAACCTATTGCTGATGGCGTAAAACTCTTTATTAAAGAACC  
CATTCGACCTTCAACCGCATCACCCGTCCTATTCCTCGTGGCCCCCTATGCTCGCTCTC  
ACACTAGCCCTAACCCTTTGAGCCCCCATACTTTCCCGTACCCTGTCGTGGACCTTA  
ACCTAGGTATTTTATTATTCTAGCTCTATCTAGCCTTGCAGTGTATTCTATTCTGGG  
CTCCGGCTGAGCATCTAATTCAAAATATGCCCTAGTAGGGGGCACTGCGGGCTGTCGC  
ACAAACAATTTCTTACGAAGTTAGCCTTGGACTCATCTTACTAAACATTATCATCTTC  
ACCGGGGGCTTCACACTCCAAACCTTTAACACAGCCCCAAGAGGCCATTTGACTGGTA  
GTGCCCCGCTTGACCGCTGGCTGCCATATGATATATCTCCACTCTTGCCGAAACAAAC  
CGTGACCCCTTCGACTTAACAGAAGGGGAATCTGAACTTGTCTCGGGCTTCAACGTA  
GAGTACGCAGGGGGGACCCTTCGCCTTGTTCTTCTTAGCCGAATATTCAAATATTCTC  
CTAATAAATACCCTGTCCGCTACACTATTTTTAGGGGGCTCCACATCCCATCTATCC  
CGGAATTAAGTAGTATCAATATTATGACTAAAGCAGCCCTTCTATCAATTGTCTTCCT  
GTGGGTCCGAGCTTCGTACCCGCGATTCCGTTACGACCAACTTATGCACCTCATTG  
AAAAAACTTTCTTCCACTGACTTTGGCACTAGTTATCTGACACTTGGCGCTCCCTATT  
GCATTTCGCTGGTCTCCCAACCACAACCTATAGATGAACCCCTACATCTTGACCACTCTT  
CTATTTGGTTTGGGCCTTGGAACAACACTCACGTTTGCAAGCTCACACTGGCTCCTC  
GCTTGAATAGGACTTGAGATTAATACACTAGCCATTATTCCCCTAATAGCCCAACAC  
CACCACCCCCGGGCAGTCGAAGCTACTACTAAATACTTTCTCGCACAAGCCACAGCA  
GCCGCCACCCTCCTGTTTGCAAGCACTACCAACGCTTGACTCACAGGCCAATGGGAT  
ATTCAACAGATAACACATCCCCCTCCCCACAACAATGATTGTTATTGCCCTCGCGCTA  
AAAGTCGGACTGGCACCAATGCACTCTTGACTCCCCGAAGTACTCCAAGGGCTAGA  
CCTGACCACCGGGCTCATCCTCTCGACCTGACAAAACTTGACCCCTTGCCCTCTT  
ACTACAAATTCAAACAACAACCCTACCCCTCTAATCATTATTGGCTTACTATCCACT  
CTCGTTGGTGGCTGAGGTGGTCTCAACCAAACCCAGCTGCGCAAGGTCCTCGCCTAC  
TCCTCAATTGCCCACCTTGCTGAATAATGCTGATCCTTCAATTTTACCCCTCCTTG  
CCCTTCTCACCCCTCCTCACGTACTTTCTATGACTTTCTCAGCATTCTTAATTTTAAAG  
TAAACAAAGCGACCACCGTCAATGCCCTCGCCATCTCGTGAACAAAACTCCTGCCC  
TCACAGCCCTAGCACCCCTGGTTTTACTTTCTCTCGGCGGCCTTCCTCCCCCTTACCGG  
CTTCATGCCCAAGTGATTCACTTTCAGGAAGTACTAAACAAGACCTTCCGCACTT  
GCCACCCTCGCCGCTTTAACTGCCCTCTTGAGTCTCTACTTCTACTTGGCGCTCTCGT  
ATGCAATAACCCTCACAATATTCCCCAACAACTAATTGGTGTCACTCCCTGACGAT  
TCTACTCCCCCAATTTACACTTCCCCTCGCCGTCTCCACTGCAGCAACCACCCTTCT  
TCTCCCACTAGCCCCCGCTGCCGTAGCACTACTGGTCACCTATGAGCCTTCTCCTAAC  
CATCATTTTCGATTGCCACCCTCCTCTCGACAGTACTAGCCCTTGATCCTTTTGATTA  
CCCCAAATTACACCAGACCACGAAAAGCTATCGCCGTACGAGTGCGGCTTTGACCC  
GATAGGATCCGCCCGGCTGCCTTTTTCACTGCGGTTTTTCTCATCGCCATCCTCTTT  
CTTCTCTTCGATTTAGAAATTGCTCTCCTCCTCCCTCTTCCATGAGGAGACCAACTAG  
CATCGCCACTACTGACGTTACCTGAGCTACAGCTGTCCTAGCCCTTCTAACCCTCG  
GCCTCATTTACGAATGAATGCAAGGAGGTCTAGAATGGGCTGAATATGCTAAAAGT  
CCTAATCCCAACACTTATGCTAATCCCAACAGCCTGGTTACTCAAACCCAGCTGACT  
CTGGCCCATGACTTTAATGTATAGCTTTTGCATCTCCTTGGTTAGCCTTTCATGACTA  
AAGAACCTCTCAGAAACCGGCTGATCGTCACTTAGCCTCTTTATAGCTACCGACTCC  
CTATCAACCCCCCTCCTCGTTCTTACATGCTGATTACTCCCACTAATAATTTTGGCAA  
GCCAAAAACACACAGCCTTAGAACCTCTTAGTCGCCAGCGCATGTACATCACACTTC  
TCGCCTCCTCCAGTTTTTCTAATCCTAGCATTTAGCGCCACCGAACTGGTGATGTTT  
TACGTAATATTTGAAGCCACCCTCATCCCCACGCTAATCATTATCACCCGCTGAGGA  
AACCAAACAGAACGTCTAAACGCAGGAACCTACTTTCTCTTCTATACATTAGCGGGC  
TCACTCCCTCTTCTCGTTGCTTTACTCCTACTCCAAAACACATCCGGCACCCCTGTCGC

TGTTAACCCTTCACTATACGGACCCGCTCGCTCTCGTCTTATGCAGACAAACTATGA  
TGAGCAGGCTGTCTTTTAGCATTCTGGTTAAAATACCCCTCTACGGGGTCCACCTA  
TGGCTCCCTAAAGCCCATGTTGAAGCCCCAATTGCAGGCTCAATAATCCTTGCAGCG  
GTTCTACTGAAGCTAGGGGGATACGGCATAATCCGCATAATAACAATATTGGAACC  
TCTAACTAAGGAGTTAAGCTACCCCTTCATTGTCTTTGCACTTTGAGGGGTAAATTATA  
ACTGGGTCAATTTGTCTACGCCAGACAGACCTTAAGTCCCTAATTGCCTACTCCTCA  
GTCAGCCACATAGGCCTAGTGGCTGGAGGAATTCTTATCCAATCACCCCTGGGGCTTA  
ACAGGGGCTCTTACCCTCATAATTGCACACGGGCTTACTTCATCAGCCCTCTTCTGCT  
TAGCAAACACAACTATGAACGAACCCACAGTCGAACGATAGTCCTGGCGCGAGGA  
CTTCAAGTAGCCCTACCACTAATAGCCACTTGATGATTTATTTCTAGCTTGGCCAACC  
TAGCTCTGCCACCACTACCCAACCTCATGGGGGAGCTGATAATTATCACTTCTTTATT  
CAACTGGTCCTGATGAACTCTGGCATTAAACGGGTGCAGGCACTCTAATCACAGCTGG  
TACTCCCTTTACATATTCTTAATAACTCAGCGGGGGCCCTCTCCCAACACATGTCATT  
GCACTTGAGCCATCTCACACCCGAGAACACCTTCTTATTGCCTTCACCTCATCCCCTT  
AATTCTACTCGTACTTAAGCCCGAGCTGATCTGAGGCTGAACTGCCTATGACCCCCA  
CACACTTTGCCTTCTCCTCAGCCTTTCTTCTGGGTTTAACAGGCCTGGCATTCCACCA  
GTTTCACCTCCTTTCCGCCCTATTGTGCCTTGAAGGAATAATACTATCCCTATTTATT  
GCTCTCTCCCTATGAACGCTCCAACCTTGACTCAACCAACTTTTCAGCATCTCCAATAC  
TTCTGCTTGCATTTTTCAGCCTGCGAAGCAAGCGCCGGCCTCGCCCTATTAGTAGCCA  
CTGCTCGAACCCACGGGACCGACCGATTACAAAGCCTAAATCTTCTCCAATGCTAAA  
TGTACCCACCTCCCTAATGATTTTCATCGAGCCTGATCACAATCTTTGCGTTACTAGC  
CTATCCTTTAATCACCACGATCCGCCCTGCACCTCGGGACCCTCAATGGGCTACCAC  
CCATGTCAAAACAGCTGTAAAAATAGCTTTCTTTGTTAGTCTGCTGCCTCTGACCCTA  
TTTCTTAATGAGGGCGCAGAAACAATCGTTACTAACTGAACCTGAATAAATACCAAC  
TCCTTCAATGTCAGCATTAGCTTGAAATTTGATTTCTACTCAATTATTTTTACACCCA  
TTGCCCTCTACGTAACCTTGATCCATCCTGGAGTTCGCATCATGGTATATGCACGCAG  
ACCCACACATGAACCGCTTCTTTAAATACCTCCTGACGTTTCTGATTGCCATAATCGT  
CCTAGTAACTGCAAACAATATGTTTCAACTATTTATCGGTTGAGAGGGCGTGGGGAT  
CATATCGTTCTTACTTATTGGATGGTGGTTCGGACGGGCGGATGCTAACACTGCAGC  
GTTCAAGCAGTACTTTACAACCGAGTAGGGGACATCGGGCTTATCTTCGCCATGGC  
TTGAATAGCAGCAAACCTAACTCCTGGGAGATGCAACAAATCTTTGCAACCACCA  
AAGACATAGACTTAACCTACCCTCTTCTCGGGCTCATCATTGCAGCAACTGGCAAAT  
CGGCTCAATTCGGACTTCACCCTTGACTACCCTCCGCTATGGAGGGTCCCACACCGG  
TCTCTGCCCTACTTCATTCTAGCACTATGGTCGTTGCCGGCATTCTTCTGCTAGTACG  
AATAAGCCCGCTACTGGAAAACAACCAAACCGCCCTCACAACCTGCCTATGCCTCG  
GAGCTCTTACAACACTATTCCTGCAACCTGTGCCCTCACGCAAAATGATATTAAAA  
AAATCGTCGCATTCTCTACATCCAGCCAGCTTGGGCTTATAATGGTAACCATTGGTC  
TAAACCAGCCACAACCTAGCGTTTCTTCACATCTGTACACATGCCTTCTTCAAGGCCA  
TACTATTTTTATGCTCCGGATCTATTATCCACAGCCTAAATGATGAACAAGATATCC  
GGAAAATAGGGGGCATAACCCACCTTGACCTTTTACATCCTCTTGCCCTAACTATTG  
GCAGCCTCGCCCTCACAGGAACCCCTTCTTGGCTGGCTTCTTCTCTAAAGATGCCA  
TCATCGAAGCATTGAACACATCCCACCTAAACGCCTGAGCCCTAACCTTAACCCTCC  
TAGCCACCTCTTTCACAGCAATCTACAGCTTTCGAGTAGTATTTTTTTGTACCCATGGG  
CCACCCCCGATTTAGTCCCTCTCTCCGATCAACGAAAACAACCCAGCAGTGATTAAC  
CCACTTAAGCGACTAGCATGGGGGAGTATCGTTGCAGGCTTACTAATTACCTCTAAT  
ATTACACCCTTGAAAACCCCTGTCATATCTATACTCCCTCCTTAACTAGCTGCTC  
TTGCAGTCACAATCATCGGCCTTCTTGTTGCTATAGAGCTCGCCATGTTAACCAACA  
AACAAATATGAGCCAATACCCAACACGACATACACCCTTCTCTGCCTTATTAGGCTT

CTTCCCCGGGGTTATACACCGCCTAACCCCTGTATTGCTCTTCTTCTTAGGCCAAAAC  
ATTGCTAACCACAGTAGATCAGACATGACTAGAAAAACGGGGCCCCAAAGCCAT  
TGAAGCCGCTAACCGACCTCTCGTCTCCTCTACAAGTAACATTCAACGGGGGGTAAT  
CAAAACATATCTCCCCTCTTCCTCCTTACACTAGCCCTTATAATCCCCCTATTTCATCA  
CCTAATGACTTTCGCTATATATTTAGTTTTATTTTCTCTTGTGTTGGGGTTAGTTGCAG  
TTGCTTCTAACCCGTCCCCTTATTTTGTGCTTTGGGTTTGGTTGTGGTAGCTGGCAT  
GGGGTGTGGTATATTAGTCGGGCATGGAGGGCCCTTTTTGTCACTAGTCTTGTTCTTA  
ATTTACTTAGGCGGGATGTTAGTTGTATTTGCATATTCAGCAGCGTTAGCTGCTGAG  
CCGTATCCAGAGAGCTGGGGTAGTTGGTTCGGTAATGGTATACGGTTGTCTACACAGG  
AGGAGTATTATAGTTTCCGGGCTGTTTTGAGGGGGGTGGTATGAATCTTCTTGGGTT  
CTAGCAGATGAGTTAGGGGAGTTTTCCGTGTTTCGAGGTGATATTGGAGGGGTAGCC  
TTAATATACTCTTCTGGGGGGTGGTTGTTAATTACTAGTGCATGGGTATTGCTCTTAA  
CTTTATTTGTAGTCCTTGAGTTAACCGGGGTATGAGTCGAGGGGGCGTTGCGACGGTT  
T"/>

<sequence id="seq\_Hippoglossus\_hippoglossus\_AM7491241" spec="Sequence"  
taxon="Hippoglossus\_hippoglossus\_AM749124" totalcount="4"  
value="ATGATACTAAGCTTCTTTGACCAATTTATATCCCCTTCATACCTCGGCATTCC  
ACTAATTGCACTAGCGATTAGCCTGCCTTGAATTCTGTTCCCAACCCCTCAAGCCGC  
TGATTAAACAACCGCGTGCTAACACTTCAGGGGTGATTTATTAGCCGCTTCACCTCA  
CAACTTCTTCTACCCCTAAACCCTGGGGGCCACAAGTGGGCAGTTCTATTACCTCG  
TTAATGTTTTCTTTTTCTATCAACATGCTAGGACTCCTTCCATACACCTTCACACCAA  
CAACCCAACTCTCCCTTAACATGGGCCTCGCAGTACCCCTTTGATTGGCAACTGTCA  
TTATGGGATACGAAATCAACCAACGCATGCCCTAGGCCACCTTCTTCCAGAAGGCAC  
CCCCACTGCCCTCATCCCTGTACTTATTATCATTGAAACAATTAGCCTATTCATTGCA  
CCCTTAGCTCTCGGTGTCCGACTAACAGCAAATCTCACAGCAGGCCACCTCCTTATT  
CAACTCATTGCAACAGCTGCCTTCGTCCTTCTTCCCCTCATACTGTTGTCGCTATCT  
TAACAACGGTGGTCCTCTTCCCTCACTCTACTAGAAGTAGCCGTTGCCATGATTC  
AAGCTTATGTCTTTGTTCTACTCCTAAGCCTATACCTACAAGAGAACGTTTAATGCCT  
CAACTGAACCCCGCACCCCTGATTTGCAATTTTAGTTTTCTCTTGAATAGTCTTTTTAA  
CTGTTATTCCCCCAAGGTTTTAGCACACACCTATCCCAATGAACCCACCTCCCAAA  
GCACACAAAAACAAAACAGAGCCCTGAAACTGACCATGATACTAAGTGGCAATCAC  
ACGTTGATTTTTCTCGACCAATCACAAAGACATCGGCACCCTCTATCTCGTATTTGGT  
GCCTGAGCCGGAATAGTGGGGACAGGCCTAAGTCTGCTTATTCGGGCAGAACTAAG  
CCAATCCGGGGCTCTCCTGGGAGACGACCAAATTTATAATGTGATCGTCACCGCACA  
CGCCTTTGTAATAATCTTTTTTATAGTAATACCCATTATGATTGGGGGGTTTCGGAAAC  
TGGCTTATTCCACTAATAATTGGGGCCCCAGACATGGCGTTCCCTCGAATGAATAAT  
ATGAGTTTCTGACTTCTTCCCCCTCCTTCTCCTCCTCTTAGCCTCTTCAGGTGTTGA  
AGCCGGAGCAGGTACCGGATGAACCGTGTACCCCCCACTAGCTGGCAATTTAGCCC  
ACGCCGGGGCATCCGTAGACCTGACAATCTTCTCACTTCACCTTGCAGGAATTTCTT  
CAATTCTGGGGGCAATTAACCTTTATTACTACCATCATTAACATGAAACCCACAACAG  
TCACTATGTACCAAATCCCGTTATTTGTTTGAGCCGTTCTTATTACAGCCGTACTTCT  
TCTTCTGTCCCTGCCCGTTTTAGCCGCAGGGATTACAATGCTACTAACAGACCGCAA  
CCTTAACACGACCTTCTTTGACCCTGCCGGAGGAGGTGACCCCATCTCTACCAACA  
CCTATTCTGATTCTTTGGTCACCCAGAGGTATACATTCTTATCCTCCCAGGCTTCGGA  
ATAATTTCTCACATTGTTGCATACTATGCAGGTAAGAAAGAACCTTTTGGCTACATG  
GGGATAGTCTGAGCTATAATGGCCATTGGACTCCTGGGCTTCATTGTCTGGGCCCAT  
CACATATTTACAGTCGGAATAGACGTAGATACACGAGCCTACTTTACCTCTGCCACA  
ATAATCATTGCAATTCCAACCTGGCGTAAAAGTCTTTAGCTGACTCGCAACCCCTCCAT

GGGGGAAGCATTAAATGAGAAACGCCCCCTTCTATGAGCCCTCGGCTTTATTTTCCTC  
TTTACAGTAGGCGGTCTCACTGGCATTGTCTTAGCTAACTCCTCTCTCGATATTGTTT  
TGCATGACACATACTATGTAGTCGCCCCACTTCCACTATGTACTATCTATGGGTGCTGT  
ATTTGCAATCGTTGCCGCCTTCGTCCATTGATTTCCGTTATTTACAGGCTATACCCTT  
CACTCCACATGAACAAAAATCCACTTCGGCCTGATGTTTATTGGGGTCAATCTAACA  
TTCTTCCCTCAACATTTTCTGGGCCTGGCTGGGATACCCCGACGGTACTCAGACTAC  
CCAGACGCATACACCCTTTGAAACACTGTTTCATCAATTGGGTCCCTAATGTCCCTC  
GTTGCTGTAATTTTATTCTTATTCATTATTTGAGAAGCATTTACAGCCAAACGAGAA  
GTCGGAGCAGTAGAACTAACTGCAACTAACATTGAATGACTTTACGGCTGCCCTCCC  
CCCTACCACACATTTGAAGAGCCCGCATTCGTACAAGTTCGTATAAACTAAATGGCA  
CATCCCTCACAACTCGGATTTCAAGACGCAGCTTCACCCTTAATAGAAGAACTACTT  
CACTTCCACGACCACGCCTTAATAATTGTAATTCTCATTAGCACAATGGTACTTTATA  
TTATTGCGGCTATAGTCACAGCCAACTAACAGATAAACTTGTACTAGACTCTCAAG  
AAATTGAAATTATCTGAACAGTTCTCCCAGCTGTTATTCCTATCCTTATCGCCCTACC  
ATCCATCCGAATTTTGTACTTAATAGACGAAATTAATGACCCCCACCTTACAATCAA  
AGCCATCGGCCACCAATGATACTGAAGCTACGAATACACAGACTACGAAGACCTCG  
GTTTTGACTCATACATAATCCCCACACAAGACCTGACCCCGGACAATTCCGACTAC  
TAGAAGCAGACCACCGAATAGTAATCCCAGTAGAATCTCCAATTCGCGTTTTAATCT  
CGGCTGAAGATGTCTTACATTCCCTGGGCAGTCCCCTCTCTAGGCGTAAAAGTTGACG  
CCGTACCTGGACGATTGAACCAAGCAACCTTTATTGTTAGCCGACCAGGCGTATTTT  
TCGGACAATGTTCTGAAATTTGCGGGGCTAACCATAGTTTTATACCCATTGTTGTAG  
AAGCAGTCCCCCTTGAACACTTTGAGAAGTGGTCTTCACTAATAATTGAAGACGCCT  
ATGGCCCATCAAGCACACCCATACCACATAGTCGACCCAGCCCATGACCCCTAAC  
AGGGGCTATTGCTGCCCTATTGATAACATCTGGCCTTGCTATCTGATTCCACTTCCAC  
TCCACAACCCTAATAACTATTGGGACAATCCTTCTCACCTTAACAATCTTCCAATGA  
TGACGGGACGTCGTACGAGAAGGCACATTTCAAGGACACCACACTCCCCCGTTCA  
AAAAGGCCTCCGATATGGGATAATTTTATTTATTACCTCAGAAGTCCTATTCTTCTTA  
GGCTTCTTCTGAGCCTTTTACCCTCAAGCCTAGCACCTACCCCTGAGCTAGGCGGC  
TTCTGACCACCAGCAGGCATTACTCCCTTAGACCCATTTGAAGTCCCACTTCTTAAC  
ACAGCAGTCCTGCTCGCCTCTGGCGTAACTGTTACCTGAGCACATCACAGCATTATG  
GAGGGTAAACGAAAACAACTATTCAATCTCTTGCTCTTACAATCTTACTCGGGGGG  
TACTTCACTTTCCTTCAAGGCCTAGAGTATCACGAAGCCCCCTTACCATTGCAGAC  
GGGGTTTACGGCGCTGCATTCTTTGTTGCCACCGGCTTCCACGGATTACACGTCTTA  
ATTGGCACATCATTCTTAGCCGTTTGTCTATTACGCCAGATTCTTCACCATTTACAT  
CAAACCACCACTTTGGGTTTGAAGCAGCCGCATGATACTGACACTTCGTAGACGTCG  
TCTGACTTTTTCTCTATATCTCTATTTACTGATGAGGATCTTAATGGCCAGTCTACGT  
AAATCCCACCCTCTTCTAAAAATCGCAAACGATGCTTTAGTCGACCTCCCCGCCCCC  
TCTAATATCTCGGTTTGATGGAACTTTGGGTCTCTTTTAGGACTCTGTTTAATTACCC  
AAATTGCGACCGGCTTATTTCTAGCCATACACTACACATCAGACATTGCTACTGCCT  
TCACCTCCGTGGCCACATCTGTGAGACGTCAACTACGGCTGACTTATCCGAAGCA  
TTCATGCCAACGGCGCATCATTCTTTTTCATTTGCCTCTACCTTCATATTGGCCGAGG  
ACTATACTATGGCTCTTACCTCTATAAAGAAACATGAAGTGTGGGGTTATTCTTCTC  
CTTCTCGTAATAATAACAGCCTTCGTTGGATACGTCCTCCCTTGAGGACAAATGTGCG  
TTTTGAGGTGCAACCGTTATTACCAACCTTCTATCTGCCGTCCCCTACGTCGGAAAC  
ACCCTAGTCCAATGAATCTGAGGGGGTTTTTCTGTAGACAATGCTACCCTCACCCGG  
TTCTTTGCCTTCCACTTTCTTCCCCCTTCATCATCGCTGCCGCAACATTAATTCATCT  
ACTCTTTCTTCACGAGACTGGCTCAAACAACCCACCCGGGCTAAACTCAGACTCCGA  
CAAAGTTCCTTTCACCCCTACTTCACTTACAAAGACCTCTTGGCTTTGCAGTACTTC



TTACTGCATTAGCATCCCTAGCCCTATTTTCCCCAAATCTCTTAGGAGACCCAGATA  
ACTTTACCCCTGCAAATCCGCTTGTTACTCCCCACACATTAAGCCAGAGTGATACT  
TCCTGTTTGCCTATGCTATTCTACGCTCCATTCCAAACAACTTGGAGGAGTACTTGC  
CCTTTTATTCTCCATCTTAGTTCTTATGCTCGTCCCTTTTCCTTCATACCTCTAAACAAC  
GAAGCCTAATATTCCGTCCCCTAACACAATTCTTGTTTTGGTCTTTAGTAGCAGACGT  
TATGATTCTAACTTGAATTGGAGGGATGCCCGTAGAACACCCCTTCGTCATCATTGG  
ACAAGTAGCGTCTCTCCTTTACTTCTCCCTCTTCCTAGTCCTGATCCCAACAGCAGGT  
TGACTAGAGAATAAAGTCCTTGGATGAAAATATGATTTCAACTCTCATTACTCATAT  
TATCAACCCACTAACCTTTATTGTGCCTGTATTGCTAGCCGTAGCATTTCCTCACCCCTC  
CTTGAACGAAAAGTGCTAGGCTACATACAACTACGAAAAGGGCCAAACATTGTTGG  
GCCTTACGGCCTCCTTCAACCTATTGCTGATGGCGTAAAACTCTTTATTAAAGAACC  
CATTCGACCTTCAACCGCATCACCCGTCCTATTTCCTCGTAGCCCCTATGCTCGCTCTC  
ACACTAGCCCTAACCCCTTTGAGCCCCCATACCTTTCCCGTACCCTGTCGTGGACCTTA  
ACCTAGGTATTTTATTTATTCTAGCTCTATCTAGCCTTGCAGTATATTCTATTCTGGG  
CTCCGGCTGAGCATCTAATTCAAATATGCCCTAGTAGGGGCACTGCGGGCTGTCGC  
ACAAACAATTTCTTACGAAGTTAGCCTTGGACTCATCTTACTAAACATTATCATCTTC  
ACCGGGGGCTTCACACTCCAAACCTTTAACACAGCCCAAGAGGCCATTTGACTGGTA  
GTGCCCGCTTGACCGCTGGCTGCCATATGATATATCTCCACTCTTGCCGAAACAAAC  
CGTGCACCCCTTCGACTTAACAGAAGGAGAATCTGAACCTTGCTCGGGCTTCAACGTA  
GAGTACGCAGGGGGACCCCTTCGCCTTGTTCTTCTTAGCCGAATATTCAAATATTCTC  
CTAATAAATACCCTGTCCGCTACACTATTTTTAGGGGCCTCCCACATCCCATCTATCC  
CGGAATTAAGTAGTATCAATATTATGACTAAAGCAGCCCTTCTATCAATTGTCTTCCT  
GTGGGTCCGAGCTTCGTACCCGCGATTCCGTTACGACCAACTTATGCACCTCATTTG  
AAAAAACTTTCTTCCACTGACTTTGGCACTAGTTATCTGACACTTGGCGCTCCCTATT  
GCATTGCTGGTCTCCCACCACAACCTATAGATGAACCCCTACATCTTGACCACTCTT  
CTATTTGGTTTGGGCCTTGAACAACACTCACGTTTGCAAGCTCACACTGGCTCCTC  
GCTTGAATAGGACTTGAGATTAATACTAGCCATTATTCCCCTAATAGCCCAACAC  
CACCACCCCGGGCAGTCGAAGCTACTACTAAATACTTTCTCGCACAAGCCACAGCA  
GCCGCCACCCTCCTGTTTGCAAGCACTACCAACGCTTGACTCACAGGCCAGTGGGAT  
ATTCAACAGATAACACATCCCCTCCCCACAACAATGATTGTTATTGCCCTCGCGCTA  
AAGGTCGGACTGGCACCAATGCACTCTTGACTCCCCGAAGTACTCCAAGGGCTAGA  
CCTGACCACCGGGCTCATCCTCTCAACCTGACAAAACTTGACCCCTTTGCCCTCTT  
ACTACAAATTCAAACAACAACCCTACGCCTCTAATCATTATTGGCTTACTATCCACT  
CTCGTTGGTGGCTGAGGTGGTCTCAACCAAACCCAGCTGCGCAAGGTCTCGCCTAC  
TCCTCAATTGCCCACCTTGGCTGAATAATGCTCATCCTTCAATTTTCACCCCTCCTTG  
CCCTTCTCACCCCTCCTCACGTACTTTCTATGACTTTCTCAGCATTCTTAATTTTTAAAG  
TAAACAAAGCGACCACCGTCAATGCCCTCGCCATCTCGTGAACAAAACTCCTGCCC  
TCACAGCCCTAGCACCCCTGGTTTTACTTTCTCTCGGCGGCCTTCCTCCCCTTACCGG  
CTTCATGCCCAAGTGATTCACTTTCAGGAAGTACTAAACAAGACCTTCCGCACTT  
GCCACCCTCGCCGCTTTAACTGCCCTCTTGAGTCTCTACTTCTACTTGCGCCTCTCGT  
ATGCAATAACCCTCACAATATTCCCCAACAACTAATTGGTGTCACTCCCTGACGAT  
TCTACTCCCCCAATTTACACTTCCCCTCGCCGTCTCCACTGCAGCAACCACCCTTCT  
TCTCCCACTAGCCCCCGCTGCCGTAGCACTACTGGTCACCTATGAGCCTTCTCCTAAC  
CATCATTTTCGATTGCCACCCTCCTCTCGACAGTACTAGCCCTTGATCCTTTTGATTA  
CCCCAAATTACACCAGACCACGAAAAGCTATCGCCGTACGAGTGCGGCTTTGACCC  
AATAGGATCCGCCCCGGCTGCCTTTTTCACTGCGGTTTTCTCATCGCCATCCTCTTT  
CTTCTCTTCGATTTAGAAATTGCTCTCCTCCTCCCTCTTCCATGAGGAGACCAACTAG  
CATCGCCACTACTGACGTTACCTGAGCTACAGCTGTCCTAGCCCTTCTAACCCCTTG

GCCTCATTTACGAATGAATGCAAGGAGGTCTAGAATGGGCTGAATATGCTAAAAGT  
CCTAATCCCAACACTTATGCTAATCCCAACAGCCTGGTTACTCAAACCCAGCTGACT  
CTGGCCCATGACTTTAATGTATAGCTTTTGCATCTCCTTGGTTAGCCTTTCATGACTA  
AAGAACCTCTCAGAAACCGGCTGATCGTCACTTAGCCTCTTTATAGCTACCGACTCC  
CTATCAACCCCCCTCCTCCTTCTTACATGCTGATTACTCCCCTAATAATTTTGGCAA  
GCCAAAAACACACAGCCTTAGAACCTCTTAGTCGCCAGCGCATGTACATCACACTTC  
TCGCCTCCTCCAGTTTTTTCCTAATCCTAGCATTTAGCGCCACCGAACTGGTAATGTTT  
TACGTAATATTTGAAGCCACCCTCATCCCCACGCTAATCATTATCACCCGCTGAGGA  
AACCAAACAGAACGTCTAAACGCAGGAACCTACTTTCTCTTCTATACATTAGCGGGC  
TCACTCCCTCTTCTCGTTGCTTTACTCCTACTCCAAAACACATCCGGCACCCCTGTGCG  
TGTTAACCCCTTCACTATACGGACCCGCTCGCTCTCGTCTTATGCAGACAAACTATGA  
TGAGCAGGCTGTCTTTTAGCATTCCTGGTTAAAATACCCCTCTACGGGGTCCACCTA  
TGGCTCCCTAAAGCCCATGTTGAAGCCCCAATTGCAGGCTCAATAATCCTTGCAGCG  
GTTCTACTGAAGCTAGGGGGATACGGCATGATCCGCATAATAACAATATTGGAACC  
TCTAACTAAGGAGTTAAGCTACCCCTTCATTGTCTTTGCACTTTGAGGGGTAAATTATA  
ACTGGGTCAATTTGTCTACGCCAGACAGACCTTAAGTCCCTAATTGCCTACTCCTCA  
GTCAGCCACATAGGCCTAGTGGCTGGAGGAATTCTTATCCAATCACCCCTGGGGCTTA  
ACAGGGGCTCTTACCCTCATAATTGCACACGGGCTTACTTCATCAGCCCTCTTCTGCT  
TAGCAAACACAACTATGAACGAACCCACAGTCGAACGATAGTCCTGGCGCGAGGA  
CTTCAAGTAGCCCTACCACTAATAGCCACTTGATGATTTATTTCTAGCTTGGCCAACC  
TAGCTCTGCCACCACTACCCAACCTCATGGGGGAGCTGATAATTATCACTTCTTTATT  
CAACTGGTCCTGATGAACCTCTGGCATTAAACCGGTGCAGGCACTCTAATCACAGCTGG  
TACTCCCTTTACATATTCTTAATAACTCAGCGGGGGCCCTCTCCCAACACATGTCATT  
GCACTTGAGCCATCTCACACCCGAGAACACCTTCTTATTGCCTTCACCTCATCCCCTT  
AATTCTACTCGTACTTAAGCCCGAGCTGATCTGAGGCTGAACCTGCCCATGACCCCCA  
CACACTTTGCCTTCTCCTCAGCCTTTCTTCTGGGTTTAAACAGGCCTGGCATTCCACCG  
GTTTCACCTCCTTTCCGCCCTATTGTGCCTTGAAGGAATAATACTATCCCTATTTATT  
GCTCTCTCCCTATGAACGCTCCAACCTTGACTCAACCAACTTTTCAGCATCTCCAATAC  
TTCTGCTTGCATTTTCAGCCTGCGAAGCAAGCGCCGGCCTCGCCCTATTAGTAGCCA  
CTGCTCGAACCCACGGGACCGACCGATTACAAAGCCTAAATCTTCTCCAATGCTAAA  
TGTACCCACCTCCCTAATGATTTTCATCGAGCCTGATCACAATCTTTGCGTTACTAGC  
CTATCCTTTAATCACACGATCCGCCCTACACCTCGGGACCCCTCAATGGGCTACCAC  
CCATGTCAAAACAGCTGTAAAAATAGCTTTCTTTGTTAGTCTGCTGCCTCTGACCCTA  
TTTCTTAATGAGGGCGCAGAAACAATCGTTACTAACTGAACCTGAATAAATACCAAC  
TCCTTCAATGTCAGCATTAGCTTGAAATTTGATTTCTACTCAATTATTTTTACACCCA  
TTGCCCTCTACGTAACCTTGATCCATCCTGGAGTTCGCATCATGGTATATGCACGCAG  
ACCCACACATGAACCGCTTCTTTAAATACCTCCTGACGTTTCTGATTGCCATAATCGT  
CCTAGTAACTGCAAACAATATGTTTCACTATTTATCGGTTGAGAGGGCGTGGGGAT  
CATATCGTTCTTACTTATTGGATGGTGGTTCGGACGGGCGGATGCTAACACTGCAGC  
GCTTCAAGCAGTACTTTACAACCGAGTAGGGGACATCGGGCTTATCTTCGCCATGGC  
TTGAATAGCAGCAAACCTAAACTCCTGGGAGATGCAACAAATCTTTGCAACCACCA  
AAGACATAGACTTAACCTACCCTCTTCTCGGACTCATCATTGCAGCAACTGGCAAAT  
CGGCTCAATTCGGACTTCACCCTTGACTACCCTCCGCTATGGAGGGTCCCACACCGG  
TCTCTGCCCTACTTCATTCTAGCACTATGGTCGTTGCCGGCATTTTTCTGCTAGTACG  
AATAAGCCCGCTACTGGAAAACAACCAAACCGCCCTCACAACCTGCCTATGCCTCG  
GAGCTCTTACAACACTATTCACTGCAACCTGTGCCCTCACGCAAAATGATATTAAAA  
AAATCGTCGCATTCTCTACATCCAGCCAGCTTGGGCTTATAATGGTAACCATTGGTC  
TAAACCAGCCACAACCTAGCATTTCTTCACATCTGTACACATGCCTTCTTCAAGGCCA

TACTATTTTTATGCTCCGGATCTATTATCCACAGCCTAAATGATGAACAAGATATCC  
GGAAAATAGGGGGGCATACACCACCTTGACCTTTCACATCCTCTTGCCTAACTATTG  
GCAGCCTCGCCCTCACAGGAACCCCTTCTTGGCTGGCTTCTTCTCTAAAGATGCCA  
TCATCGAAGCATTGAACACATCCACCTAAACGCCTGAGCCCTAACCTTAACCCTCC  
TAGCCACCTCTTTCACAGCAATCTACAGCTTTCGAGTAGTATTTTTTGTACCCATGGG  
CCACCCCGATTAGTCCCTCTCTCCGATCAACGAAAACAACCCAGCAGTGATTAAC  
CCACTTAAGCGACTAGCATGGGGGAGTATCGTTGCAGGCTTACTAATTACCTCTAAT  
ATTACACCCTTGAAAACCCCTGTCATATCTATACCTCCCCTCCTTAAACTAGCTGCTC  
TTGCAGTCACAATCATCGGCCTTCTTGTTGCTATAGAGCTCGCCATGTTAACCAACA  
AACAATATGAGCCAATACCCAACACGACATACACCACCTTCTCTGCCTTATTAGGCTT  
CTTCCCCGGGGTTATACACCGCCTAACCCCTGTATTGCTCTTCTTCCTAGGCCAAAAC  
ATTGCTAACCAAACAGTAGATCAGACATGATTAGAAAAAACGGGCCCCAAAGCCAT  
TGAAGCCGCTAACCGACCTCTCGTCTCCTCTACAAGTAACATTCAACGGGGGGTAAT  
CAAAACATATCTCCCCTCTTCCTCCTTACACTAGCCCTTATAATCCCCCTATTTCATCA  
CCTAATGACTTTTCGCTATATATTTAGTTTTATTTTCTCTTGTGTTGGGGTTAGTTGCAG  
TTGCTTCTAATCCGTCCCCTTATTTTGCTGCTTTGGGTTTGGTTGTGGTAGCTGGCAT  
GGGGTGTGGTATATTAGTCGGGCATGGAGGGCCCTTTTTGTCACTAGTCTTGTCTTA  
ATTTACTTAGGCGGGATGTTAGTTGTATTTGCATATTCAGCAGCGTTAGCTGCTGAG  
CCGTACCCAGAGAGCTGGGGTAGTTGGTCGGTAATGGTATACGGTTGTCTACACAG  
GGGGAGTATTATAGTTTCCGGGCTGTTTTGAGGGGGGTGGTATGAATCTTCTTGGGT  
TCTAGCAGATGAGTTAGGGGAGTTTTCCGTGTTTCGAGGTGATATTGGAGGGGTAGC  
CTTAATATACTCTTCTGGGGGGTGGTTGTTAATCACTAGTGCATGGGTATTGCTTTTA  
ACTTTATTTGTAGTCCTTGAGTTAACCGGGGTATGAGTCGAGGGGCGTTGCGACGGT  
TT"/>

<sequence id="seq\_Hippoglossus\_stenolepis\_AM7491261" spec="Sequence"  
taxon="Hippoglossus\_stenolepis\_AM749126" totalcount="4"  
value="ATGATACTAAGCTTCTTTGACCAATTTATATCCCCTTCATACCTCGGCATCCC  
ACTAATTGCTCTAGCGATTAGCCTGCCTTGAATTCTGTTCCCAACCCCGCAAGCCGC  
TGATTAAACAACCGCGTACTAACGCTTCAAGGGTGATTTATTAGCCGCTTCACCTCG  
CAACTTCTTCTACCCCTAAACCCCGGAGGCCACAAGTGGGCAGTTCTATTACCTCG  
TTAATGTTTTCTTTTCTATCAACATACTAGGACTCCTTCCATACACCTTCACACCAA  
CGACCCAACCTCTCCCTTAATATAGGCCTCGCAGTACCCCTTTGATTAGCAACTGTCA  
TTATGGGATACGAAATCAACCAACGCATGCCCTAGGCCACCTTCTTCCAGAAGGCAC  
CCCCACTGCCCTCATCCCTGTACTTATTATCATTGAAACAATTAGCCTATTCATTGCA  
CCCCTCGCTCTCGGTGTCCGACTAACAGCAAATCTCACAGCAGGCCACCTCCTTATT  
CAACTCATTGCAACAGCTGCCTTCGTCCTTCTTCCCCTCATACTGTTGTTGCTATCT  
TAACAACGGTGGTCCTCTTCCTCCTCACCTACTAGAAGTAGCCGTTGCCATGATTC  
AAGCTTATGTCTTTGTTCTACTCCTAAGCCTATATCTACAAGAGAACGTTTAATGCCT  
CAACTGAACCCCGCACCTGATTTGCAATTTTAGTTTTCTCTTGAATAATCTTTTTAA  
CTGTTATTCCCCCAAAGTTTTAGCACACACCTATCCTAATGAACCCACCTCCCAA  
GCACACAAAAACAAAACAGAGCCCTGAAACTGACCATGATACTAAGTGGCAATCAC  
ACGTTGATTTTTCTCGACCAATCACAAAGACATCGGCACCCTCTATCTCGTATTTGGT  
GCCTGAGCCGGAATAGTGGGGACAGGCCTAAGTCTGCTTATTCGGGCAGAACTAAG  
CCAACCCGGGGCTCTCCTGGGAGACGACCAAATTTATAATGTAATCGTCACCGCACA  
CGCCTTTGTAATAATCTTTTTTATAGTAATACCCATTATGATTGGGGGGTTTCGGAAAC  
TGGCTTATTCCACTAATAATTGGGGCCCCAGATATGGCGTTCCCTCGAATGAATAAC  
ATGAGTTTCTGACTTCTTCCCCCTCCTTTCTCCTCCTCTTAGCCTCTTCAGGTGTTGA  
AGCCGGAGCAGGTACCGGATGAACCGTATACCCCCCACTAGCTGGCAATTTAGCCC

ACGCCGGGGCATCCGTAGACCTGACAATCTTCTCACTTCACCTTGCAGGAATTTTCAT  
CAATTCTGGGGGCAATTAACCTTTATTACTACTATCATTAACATGAAACCCACAACAG  
TCACTATGTACCAAATCCCCTTATTTGTTTGAGCCGTTCTTATTACAGCCGTACTTCT  
TCTTCTATCCCTGCCCCGTTTTAGCCGCAGGAATTACAATACTACTGACAGACCGCAA  
CCTTAACACGACCTTCTTTGACCCTGCCGGAGGAGGTGACCCCATCCTCTACCAGCA  
CCTATTCTGATTCTTTGGTCACCCAGAGGTATACATTCTTATTCTCCCGGGCTTCGGA  
ATAATTTCTCACATTGTTGCATACTATGCAGGTAAGAAAGAACCTTTTGGCTACATG  
GGGATAGTCTGAGCCATAATGGCCATTGGACTCCTGGGGTTCATTGTCTGGGCCC  
CACATATTTACAGTCGGAATAGATGTAGATACACGAGCCTACTTTACCTCTGCCACA  
ATAATCATTGCGATTCCAACCTGGCGTAAAAGTCTTTAGCTGACTCGCAACCCTCCAT  
GGAGGAAGCATTAAATGAGAAACACCCCTTCTATGAGCCCTCGGCTTTATTTTTCTC  
TTTACAGTAGGCGGTCTCACTGGCATCGTCTTAGCTAACTCCTCTCTCGATATTGTT  
TGCATGACACATACTATGTAGTCGCTCACTTCCACTATGTACTATCTATGGGTGCTGT  
ATTTGCAATCGTTGCCGCCTTCGTCCACTGGTTTCCATTATTTACAGGCTATACCCTT  
CACTCCACATGAACAAAAATCCACTTCGGCCTGATATTTATTGGAGTCAATCTAACA  
TTCTTCCCCAACATTTTCTGGGCCTGGCCGGAATACCCCGACGGTACTCAGACTAC  
CCAGATGCATACACCCTTTGAAACACTGTTTCATCAATCGGGTCCCTAATGTCCCTC  
GTTGCTGTAATTTTATTTTTATTTCATTATTTGAGAAGCATTACAGCCAAACGAGAAG  
TCGGAGCAGTAGAACTAACTGCAACTAACATTGAATGACTTTACGGCTGCCCTCCGC  
CCTACCACACATTTGAAGAGCCCCGCATTCGTACAAGTTCGTATAAACTAAATGGCAC  
ATCCCTCACAACCTCGGATTTCAAGACGCAGCTTCACCCTTAATAGAAGAACTACTTC  
ACTTCCACGACCACGCCTTAATAATTGTAATTCTCATTAGCACAAATAGTACTTTATAT  
TATTGCGGCTATAGTCACAGCCAACTAACAGATAAACTTGTACTAGACTCTCAAGA  
AATTGAAATTATCTGAACAGTTCTCCCAGCTGTTATTCTTATCCTTATCGCCCTACCA  
TCCATCCGAATTTTGTACTTAATAGACGAAATTAATGACCCCCACCTGACAATTA  
GCCATTGGCCACCAGTGATACTGAAGCTACGAATACACAGACTACGAAGACCTCGG  
TTTTGACTCATAATAATCCCCACACAAGACCTGACCCCGGACAATTCCGACTACT  
AGAAGCAGACCACCGAATAGTAATCCCGGTAGAATCCCCAATTCGCGTTTTAATCTC  
GGCTGAAGATGTCTTACATTCCCTGGGCAGTCCCCTCTCTAGGCGTAAAAGTTGACGC  
CGTACCTGGACGATTGAACCAAGCAACCTTTATTGTTAGCCGACCAGGCGTATTTTT  
CGGACAATGTTCTGAGATTTGCGGGGCTAACCATAGTTTTATACCCATTGTTGTAGA  
AGCAGTCCCCCTTGAACACTTTGAGAACTGGTCTTCACTAATAATTGAAGACGCCTA  
TGGCCCATCAAGCACACCCATAACACATAGTCGACCCAGCCCATGACCCCTAACA  
GGGGCTATTGCTGCCCTATTGATAACATCTGGCCTTGCTATCTGATTCCACTTCCACT  
CCACAACCCTGATAACTATTGGGACAATCCTTCTCACCTTAACAATCTTCCAATGAT  
GACGGGACGTCGTACGGGAAGGCACATTTCAAGGACACCACACTCCCCCGTTCAA  
AAAGGCCTCCGATATGGAATAATTTTATTTATTACCTCAGAAGTCCTATTCTTCTTAG  
GCTTCTTCTGAGCCTTTTACCATTCAAGCCTAGCACCTACCCCTGAACTAGGCGGCTT  
CTGACCACCGGCAGGCATTACTCCCTTAGACCCCTTTGAAGTCCCACTTCTTAACAC  
AGCAGTCCTGCTTGCCTCTGGCGTAACTGTTACCTGAGCACACCACAGCATTATAGA  
GGGTAAACGAAAACAACTATTCAATCTCTTGCTCTTACAATCTTACTCGGGGGGTA  
CTTCACTTTCCCTTCAAGGCCTAGAGTATCACGAAGCCCCCTTACCATTGCAGACGG  
AGTTTACGGCGCTACATTCTTTGTTGCCACCGGCTTCCACGGACTACACGTCTTAATT  
GGCACGTCAATTCTTAGCCGTTTGTCTATTACGCCAAATTCTTACCATTTACATCAA  
ACCACCACTTTGGGTTTGAAGCAGCCGCATGATACTGACACTTCGTAGACGTCGTCT  
GACTTTTCTCTATATCTCTATTTACTGATGAGGATCTTAATGGCCAGTCTACGTAAA  
TCCCACCCTCTTCTAAAAATCGCAAACGATGCTTTAGTCGACCTCCCAGCCCCCTCT  
AATATCTCTGTTTGATGAAACTTTGGGTCTCTTTTAGGACTCTGTTTAATTACCCAAA

TTGCAACCGGCTTATTTCTAGCCATACACTACACATCAGACATTGCTACTGCCTTCAC  
CTCCGTAGCCACATCTGTCGAGACGTCAACTACGGCTGACTTATCCGAAGCATTCA  
TGCCAACGGCGCATCATTCTTTTTTCATTTGCCTCTACCTTCATATTGGCCGAGGTCTA  
TACTATGGCTCTTACCTCTATAAAGAAACATGAACTGTTGGGGTTATTCTCCTCCTTC  
TCGTAATAATAACAGCCTTCGTTGGATACGTCCTCCCTTGAGGACAAATGTCGTTTT  
GAGGTGCAACCGTTATTACCAACCTTCTATCTGCCGTCCCCTACGTCGGAAACACCC  
TGGTCCAATGGATCTGAGGTGGTTTTTCTGTAGACAATGCTACCCTCACCCGGTTCTT  
TGCCTTCCACTTTCTCTTCCCCTTCATCATCGCTGCCGCAACGTTAATTCATCTACTCT  
TTCTTCACGAACTGGCTCAAACAACCCAACCGGGCTAAACTCAGACTCCGACAAA  
GTTCCCTTTACCCCTACTTCACTTACAAGGACCTCTTGGCTTTGCAGTCCTTCTTAC  
TGCATTAGCATCCCTAGCCCTATTTTCCCCAAATCTCTTAGGAGACCCAGATAACTTT  
ACCCCTGCAAATCCGCTTGTTACTCCCCCACACATTAAGCCAGAGTGATACTTCCTG  
TTTGCCTATGCTATTCTCCGCTCCATCCCAAACAACTTGAGGAGTACTTGCCCTTT  
TATTCTCAATCTTAGTTCTTATGCTCGTCCCCTTCCTTCATACCTCTAAACAACGAAG  
CCTGATATTCCGTCCCCTAACACAATTTTTGTTCTGATCTTTAGTAGCAGACGTTATG  
ATTCTAACTTGAATTGGAGGAATGCCCGTAGAACACCCCTTCGTTATCATTGGGCAA  
GTAGCGTCTCTCCTTTACTTCTCCCTCTTCCTAGTCCTGATCCCAACAGCAGGTTGAC  
TAGAGAATAAAGTCCTTGGATGAAAATATGATTTCAACTCTCATTACGCATATTATC  
AACCCACTAACCTTTATTGTACCTGTATTGCTAGCCGTAGCATTCCCTACCCTCCTTG  
AACGAAAAGTGCTAGGCTACATACAACCTCCGAAAAGGGCCAAACATCGTAGGGCCT  
TACGGCCTCCTTCAACCTATTGCTGATGGTGTAACCTCTTTATTAAAGAACCCATTC  
GACCTTCGACCGCATCACCCGTCCTATTCCTCCTGGCCCCCTATGCTCGCTCTCACACT  
AGCCCTAACCTTTGAGCCCCCATACCTTTCCCGTACCCTGTCTGGACCTTAACCTA  
GGTATTTTATTTATTCTAGCCCTATCTAGCCTTGCAGTATATTCTATTCTGGGCTCCG  
GCTGAGCATCTAATTCAAATATGCCCTAGTAGGGGCACTGCGGGCTGTCGCACAA  
ACAATTTCTTACGAAGTCAGCCTTGGACTCATCTTGCTAAACATTATCATCTTTACCG  
GAGGCTTCACACTTCAAACCTTTAACACAGCCCAAGAGGCCATTTGACTAGTAGTGC  
CCGCTTGACCACTGGCTGCCATATGATATATCTCCACTCTTGCCGAAACAAACCGTG  
CACCTTCGACTTAACAGAAGGAGAGTCTGAACTTGTCTCGGGCTTCAACGTAGAGT  
ACGCAGGCGGACCCTTCGCCTTGTTCTTCTTGGCCGAATATTCAAATATTCTCCTAAT  
AAATACCCTGTCCGCTACACTATTTTTAGGGGCTCCACATTCCATCTATCCCAGA  
ATTAACCAGTATCAATATTATGACTAAAGCAGCCCTTCTGTCAATTGTCTTCCTATGA  
GTCCGAGCTTCGTACCCGCGATTCCGTTACGACCAACTTATGCACCTCATTGAAAA  
AACTTTCTTCCACTGACTTTGGCACTAGTTATCTGACACTTGGCGCTCCCTATTGCAT  
TCGCTGGTCTCCACCACTATAGATGAACCCCTACATCTTGACCACTCTTCTATT  
TGGTTTGGGCCTAGGAACAACACTCACGTTTGCAAGCTCACACTGGCTTCTCGCTTG  
AATAGGACTTGAGATTAATACTAGCCATTATTCCCCTAATAGCCCAACATCACCA  
CCCCCGGGCAGTCGAAGCTACCACTAAGTACTTTCTCGCACAAGCCACAGCAGCCG  
CCACCCTCCTGTTTGGCAGTACTACCAACGCTTGACTCACAGGCCAATGGGACATTC  
AACAGATAACACACCCCCTCCCAACAACAATGATTGTTATTGCCCTCGCACTAAAAG  
TCGGACTGGCACCAATGCACTCTTGACTTCCCGAAGTACTCCAAGGACTAGACCTAA  
CCACCGGACTTATCCTCTCAACCTGACAAAAACTTGACCCCTTTGCCCTCTTACTACA  
AATTCAGACAACAACCCTACGCCTCTAATCATTATTGGCTTACTATCCACGCTCGTT  
GGTGGCTGAGGTGGTCTCAACCAAACCCAGTTACGCAAAGTCCTCGCCTACTCCTCA  
ATTGCCACCTTGGCTGAATAATGCTGATCGTTCAATTTTACCCCTCCTTGCCCTTC  
TCACCCTCCTCACGTACTTTCTATGACTTTCTCAGCATTCTAATTTTTAAAGTAAAT  
AAAGCCACCACTGTCAATGCCCTCGCAATCTCGTGAACAAAGACTCCTGCCCTCACA  
GCCCTAGCACCCCTGGTTTTACTATCCCTCGGCGGCCTTCCCCCCTTACCGGCTTCA

TACCCAAGTGATTTATTCTTCAGGAACTGACTAAGCAAGACCTTCCACACTTGCCAC  
CCTCGCCGCTTTAACTGCCCTCTTGAGTCTCTACTTCTACCTCCGTCTCTCATATGCA  
ATAACCCTCACAATATTCCCCAACAACTCATTGGCGTCACTCCCTGACGATTCTAC  
TCCCCCAATTTACGCTTCCCCTCGCCGTCTCCACTGCAGCAACCACCCTTCTCCTCC  
CACTAGCCCCCGCTGCCGTAGCACTACTGGTCACCTATGAGCCTTCTTCTAACCATC  
ATTTTCGATTGCCACCCTCCTCTCGACAGTACTTGCCCTTGTGTCTTTTGATTACCCC  
AAATTACACCAGACCACGAAAACTATCACCTTACGAGTGCGGCTTTGACCCGATA  
GGATCCGCCCCGGCTGCCTTTTTCACTGCGGTTTTTCTCATCGCCATCCTCTTTCTTCT  
ATTCGATTTAGAAATTGCTCTCCTCCTCCCTCTTCCATGAGGTGACCAACTAGCATCA  
CCTACTGACATTCACCTGAGCTACAGCTGTCTAGCCCTTCTAACCCTTGGCCTCA  
TTTACGAATGAATGCAAGGGGGTCTAGAATGGGCGGAATATGCTAAAAGTCCTAAT  
CCCAACACTTATGCTAATCCCAACAGCCTGGTTACTCAAACCCAACTGACTCTGACC  
CATGACTTTAATGTATAGCTTTTGCATCTCCTTGGTCAGCCTTTCGTGACTAAAAAAC  
CTCTCAGAAACCGGCTGATCGTCACTTAGCCTCTTTATAGCTACCGACTCCCTATCG  
ACCCCCCTCCTCGTTCTTACATGCTGATTACTCCCATAATAATTTTGGCAAGCCAGA  
AACACACAGCCTTAGAACCTCTTAGTCGCCAGCGCATGTACATCACACTTCTCGCCT  
CCTCCAGTTCTTCCCTAATCCTAGCATTTAGCGCCACCGAACTGGTAATGTTTTACGTA  
ATATTTGAAGCCACCCTTATCCCCACGCTAATCATTATCACCCGCTGAGGAAACCAA  
ACAGAACGTCTAAACGCAGGAACCTACTTTCTCTTCTATACATTAGCGGGCTCACTC  
CCCCTTCTCGTTGCTTTACTCCTACTCCAAAACACATCCGGCACCCCTATCGTTGTAA  
CCCTTCACTATACGGACCCGCTCGCTCTCGTCTTATGCAGACAACTATGATGAGCA  
GGCTGTCTTTTAGCATTCCTGGTTAAAATACCCCTCTACGGGGTCCACCTATGGCTCC  
CTAAAGCCCATGTTGAAGCTCCAATTGCAGGCTCAATAATCCTTGCAGCAGTTCTAC  
TGAAGCTAGGGGGATACGGCATGATCCGCATGATAACGATATTGGAACCTCTAACT  
AAGGAATTAAGCTACCCCTTCATTGTCTTTGCACTTTGAGGGGTAATTATAACTGGC  
TCAATTTGTCTACGCCAGACAGACCTTAAGTCCTTAATTGCCTACTCATCAGTCAGC  
CACATGGGCCTAGTGGCTGGGGGAATTCTTATTCAATCACCTGAGGCTTAACAGGA  
GCCCTCACCTCATAATTGCACACGGTCTTACTTCATCAGCCCTCTTCTGCTTGGCAA  
ACACAACTATGAACGAACCCACAGTCGAACAATGGTCCTGGCGCGAGGACTTCAA  
GTAGCCCTACCACTAATAGCCACTTGGTGGTTTATTTCTAGCTTGGCCAACCTAGCTC  
TGCCACCACTACCCAACCTCATGGGGGAGCTGATAATTATCACTTCTTTATTCAACT  
GGTCCTGGTGAACCTCTGGCATTAAACCGGTGCAGGCACTCTAATCACAGCTGGTTACT  
CCCTTTACATATTCTTAATAACTCAACGGGGGCCCTATCCCAACACATGTCATTGCACT  
TGAACCATCTCACACCCGAGAACACCTTCTTATTGCCTTCACCTTATCCCCTAATTC  
TGCTCGTACTTAAGCCCGAGCTGATCTGAGGCTGAACTGCCTATGACCCCCACACAC  
TTTGCCTTCTCCTCAGCCTTTCTTCTGGGTTTAAACAGGCCTGGCATTCCACCGGTTTC  
ACCTCCTTTCCGCTCTATTGTGCCTTGAAGGAATAATACTATCCCTATTTATTGCTCT  
TTCCCTATGAACGCTACAACCTTGACTCAACCAACTTTTCAGCATCTCCAATACTTCTG  
CTTGCATTTTTCAGCCTGCGAAGCAAGCGCCGGTCTCGCCCTATTAGTAGCCACTGCT  
CGAACCCACGGGACCGACCGATTACAAAGCCTAAATCTTCTCCAATGCTAAATGTAC  
CCCACCTCCCTAATGATTTTCATCGAGCCTGATCACAATCTTTGCATTACTAGCCTATC  
CTTTAATCACACGATCCGTCCTACACCTCGAGGCCCTCAATGAGCTACCACCCATG  
TCAAAACAGCTGTAAAAATAGCTTTCTTTGTTAGTCTGCTACCTCTGACCCTATTTCT  
TAATGAGGGGCGCAGAAACAATCGTTACTAATTGAACCTGAATAAATACTAACTCCTT  
CAATATCAACATTAGCTTGAAATTTGATTTCTACTCAATTATTTTTACACCCATTGCC  
CTCTACGTAACCTGGTCCATCCTGGAGTTCGCATCATGATACATGCACGCAGACCCA  
CACATGAACCGCTTCTTTAAATACCTCCTGACGTTTCTGATTGCCATAATCGTCCTAG  
TAACTGCAAACAATATGTTTCAACTATTTATCGGCTGGGAGGGAGTGGGGATCATAT

CGTTCTTACTTATTGGATGGTGGTTCGGACGGGCGGATGCTAACACTGCAGCGCTTC  
AAGCAGTAATTTACAACCGAGTAGGAGACATCGGACTTATCTTCGCCATGGCTTGAA  
TAGCAGCAAACCTTAACTCCTGAGAGATACAACAAATCTTTGCAACCACCAAGGAC  
ATAGACTTAACCTACCCTCTTCTCGGACTCATCATTGCAGCAACTGGCAAATCGGCT  
CAATTCGGACTTCACCCTTGACTACCCTCCGCTATGGAGGGTCCCACACCGGTCTCT  
GCCCTACTTCATTCTAGCACTATGGTCGTTGCCGGCATTTTCTGCTAGTACGAATAA  
GCCCCCTCCTGGAAAACAACCAACCGCCCTCACAACCTGCCTATGCCTCGGAGCTC  
TTACAACACTATTCACTGCAACCTGTGCCCTCACGCAAAATGATATTAATAAATCG  
TCGCATTCTCTACATCCAGCCAGCTTGGGCTTATAATGGTAACCATTGGTCTAAACC  
AACCACAACCTAGCATTTCTTCACATCTGTACACATGCCTTCTTTAAAGCCATACTGTT  
TTTATGCTCCGGATCTATTATCCACAGCCTAAATGATGAACAAGATATCCGCAAAAT  
AGGGGGCATAACCCACCTTGCACCTTTCACATCCTCTTGCCTAACTATTGGCAGCCT  
CGCCCTCACAGGAACCCCTTCTTGGCTGGCTTCTTCTCTAAAGATGCCATCATCGA  
AGCATTGAACACATCCCACCTAAACGCCTGAGCCCTAACCTTAACCTCCTAGCCAC  
CTCTTTCACAGCAATCTACAGCTTTCGAGTAGTATTTTTTGTACCCATGGGGCCACCCC  
CGATTTAGTCCCTCTCTCCGATCAACGAAAACAACCCAGCAGTAATTAACCCACTTA  
AGCGGCTAGCATGGGGAAGTATCGTTGCAGGCTTACTAATTACCTCTAATATTACAC  
CCTTAAACCCCTGTCTATATCCATGCCTCCTCTCCTTAACTAGCTGCTCTTGCAGT  
TACAATCATCGGCCTTCTTGTGCTATAGAGCTCGCCATATTAACCAACAAGCAATA  
TGAGCCAATACCCGGCACGACATACACCACTTCTCTGCCTTATTAGGCTTCTTCCCC  
GGGGTCATACACCGCCTAACCCCTGTATTGCTCTTCTTCTAGGCCAAAATATTGCT  
AACCAACAGTAGATCAGACATGATTAGAAAAAACAGGCCCAAAGCCATTGAATC  
CGCTAACCGACCTCTAGTGTCTCTACAAGTAATATTCAACGGGGGGGTGATCAAAAC  
ATATCTTCCCTCTTCCCTCCTAACACTAGCCCTTATAATCCCCATATTCATCACCTAAT  
GACTTTCGCTATATATTTAGTTTTATTTTCTCTTGTGTTGGGGTGTAGTTGCAGTTGCTT  
CTAATCCGTCCCCTTATTTTGCTGCTTTGGGTTTGGTTGTGGTAGCTGGCATGGGGTG  
TGGTATATTAGTTGGGCATGGAGGGGCCCTTTTGTCACTAGTCCTGTTCTTAATTTAC  
TTAGGCGGGATGTTAGTTGTATTTGCATATTCAGCAGCGTTAGCTGCTGAGCCGTAC  
CCAGAGAGCTGGGGTAGTTGGTTCGGTAATGGTCTACGGTTGTCTATACAGGAGGAG  
TATTATAGTTTCTGGATTGTTTTGAGGGGGGTGGTATGAATCTTCTTGGGTCTTAGCA  
GATGAGTTGGGGGAGTTTTCCGTATTTTCGAGGGGATATCGGAGGGGTAGCCTTAATA  
TACTCTTCTGGGGGGTGGTTGTTAATCACTAGTGCATGGGTATTGCTCTTAACCTTTGT  
TTGTAGTCCTTGAGTTAACCGGGGTATGAGCCGAGGGGCGTTGCGACGGTTT"/>

<sequence id="seq\_Hippoglossus\_stenolepis\_AM7491271" spec="Sequence"  
taxon="Hippoglossus\_stenolepis\_AM749127" totalcount="4"  
value="ATGATACTAAGCTTCTTTGACCAATTTATATCCCCTTCATACCTCGGCATCCC  
ACTAATTGCACTAGCGATTAGCCTGCCTTGAATTCTGTTCCCAACCCCAACAAGCCGC  
TGATTAAACAACCGCGTACTAACACTTCAAGGGTGATTTATTAGCCGCTTCACCTCG  
CAACTTCTTCTACCCCTAAACCCCGGAGGCCACAAGTGGGCAGTTCTATTACCTCG  
TTAATGTTTTCTTTTCTATCAACATGCTAGGACTCCTTCCATACACCTTCACACCAA  
CGACCCAACTCTCCCTTAATATAGGCCTCGCAGTACCCCTTTGATTAGCAACTGTCA  
TTATGGGATACGAAATCAACCAACGCATGCCCTAGGCCACCTTCTTCCAGAAGGCAC  
CCCCACTGCCCTCATCCCTGTACTTATTATCATTGAAACAATTAGCCTATTCATTGCA  
CCCCTCGCTCTCGGTGTCCGACTAACAGCAAATCTCACAGCAGGCCACCTCCTTATT  
CAGCTCATTGCAACAGCTGCCTTCGTCCTTCTTCCCCTCATACTGTTGTTGCTATCT  
TAACAACGGTGGTCTCTTCCCTCCTCACCTACTAGAAGTAGCCGTTGCCATGATTC  
AAGCTTATGTCTTTGTTCTACTCCTAAGCCTATATCTACAAGAGAACGTTTAATGCCT  
CAACTGAACCCCGCACCCCTGATTTGCAATTTTAGTTTTCTTGAATAATCTTTTAA

CTGTTATTCCCCCAAAGTTTTAGCACACACCTATCCTAATGAACCCACCTCCCAA  
GCACACAAAAACAAAACAGAGCCCTGAAACTGACCATGATACTAAGTGGCAATCAC  
ACGTTGATTTTTCTCGACCAATCACAAAGACATCGGCACCCTCTATCTCGTATTTGGT  
GCCTGAGCCGGAATAGTGGGGACAGGCCTAAGTCTGCTTATTCGGGCAGAACTAAG  
CCAACCCGGGGCTCTCCTGGGAGACGACCAAATTTATAATGTAATCGTCACCGCACA  
CGCCTTTGTAATAATCTTTTTTATAGTAATACCCATTATGATTGGGGGGTTTCGGAAAC  
TGGCTTATTCCACTAATAATTGGGGCCCCAGATATGGCGTTCCTCGAATGAATAAT  
ATGAGTTTCTGACTTCTTCCCCCTCCTTTCTCCTCCTCTTAGCCTCTTCAGGTGTTGA  
AGCCGGAGCAGGTACCGGATGAACCGTATACCCCCACTAGCTGGCAATTTAGCCC  
ACGCCGGAGCATCCGTAGACCTGACAATCTTCTCACTTCACCTTGCAGGAATTTTCAT  
CAATTCTGGGGGCAATTAACCTTTATTACTACTATCATTAACATGAAACCCACAACAG  
TCACTATGTACCAAATCCCCTTATTTGTTTGAGCCGTTCTTATTACAGCCGTACTTCT  
TCTTCTATCCCTGCCCCTTTAGCCGCAGGAATTACAATACTACTAACAGACCGCAA  
CCTTAACACGACCTTCTTTGACCCTGCCGGAGGAGGTGACCCCATCCTCTACCAGCA  
CCTATTCTGATTCTTTGGTCACCCAGAGGTATACATTCTTATTCTCCCGGGCTTCGGA  
ATAATTTCTCACATTGTTGCATACTATGCAGGTAAGAAAGAACCTTTTGGCTACATG  
GGGATAGTCTGAGCTATAATGGCCATTGGACTCCTGGGGTTTATTGTCTGGGCCCCAT  
CACATATTTACAGTCGGAATAGATGTAGATACACGAGCCTACTTTACCTCTGCCACA  
ATAATCATTGCGATTCCAACCTGGCGTAAAAGTCTTTAGCTGACTTGCAACCCTCCAT  
GGAGGAAGCATTAAATGAGAAACACCCCTTCTATGAGCCCTCGGCTTTATTTTCCTC  
TTTACAGTAGGCGGTCTCACTGGCATTGTCTTAGCTAACTCCTCTCTCGATATTGTTT  
TGCATGACACATACTATGTAGTCGCTCACTTCCACTATGTACTATCTATGGGTGCTGT  
ATTTGCAATCGTTGCCGCCTTCGTCCACTGGTTTCCATTATTTACAGGCTATACCCTT  
CACTCCACATGAACAAAAATCCACTTCGGCCTGATATTTATTGGAGTCAATCTAACA  
TTCTTCCCCAACATTTTCTGGGCCTGGCCGGAATACCCCGACGGTACTCAGACTAC  
CCAGATGCATACACCCTTTGAAACACTGTTTCATCAATCGGGTCCCTAATGTCCCTC  
GTTGCTGTAATTTTATTTTATTTCATTATTTGAGAAGCATTACAGCCAAACGAGAAG  
TCGGAGCAGTAGAACTAACTGCAACTAACATTGAATGACTTTACGGCTGCCCTCCGC  
CCTACCACACATTTGAAGAGCCCGCATTCGTACAAGTTCGTATAAACTAAATGGCAC  
ATCCCTCACAACTCGGATTTCAAGACGCAGCTTCACCCTTAATAGAAGAACTACTTC  
ACTTCCACGACCACGCCTTAATAATTGTAATTCTCATTAGCACAAATAGTACTTTATAT  
TATTGCGGCTATAGTCACAGCCAACTAACAGATAAACTTGTACTAGACTCTCAAGA  
AATTGAAATTATCTGAACAGTTCTCCCAGCTGTTATTCTTATCCTTATCGCCCTACCA  
TCCATCCGAATTTTGTACTTAATAGACGAAATTAATGACCCCCACCTGACAATTA  
GCCATTGGCCACCAGTGATACTGAAGCTACGAATACACAGACTACGAAGACCTCGG  
TTTTGACTCATAATAATCCCCACACAAGACCTGACCCCTGGACAATTCCGACTACT  
AGAAGCAGACCACCGAATAGTAATCCCGGTAGAATCCCCAATTCGCGTTTTAATCTC  
GGCTGAAGATGTCTTACATTCCCTGGGCAGTCCCCTCTCTAGGCGTAAAAGTTGACGC  
CGTACCTGGACGATTGAACCAAGCAACCTTTATTGTTAGCCGACCAGGCGTATTTTT  
CGGACAATGTTCTGAGATTTGCGGGGCTAACCATAGTTTTATACCCATTGTTGTAGA  
AGCAGTCCCCCTTGAACACTTTGAGAACTGGTCTTCACTAATAATTGAAGACGCCTA  
TGGCCCATCAAGCACACCCCTACCACATAGTCGACCCAGCCCATGACCCCTAACAG  
GGGCTATTGCTGCCCTATTGATAACATCTGGCCTTGCTATCTGATTCCACTTCCACTC  
CACAACCCTGATAACTATTGGGACAATCCTTCTCACCTTAACAATCTTCCAATGATG  
ACGGGACGTCGTACGGGAAGGCACATTTCAAGGACACCACACTCCCCCGTTCAAA  
AAGGCCTCCGATATGGTATAATTTTATTTATTACCTCAGAAGTCCTATTCTTCTTAGG  
CTTCTTCTGAGCCTTTTACCATTCAAGCCTAGCACCTACCCCTGAGCTAGGCGGGCTTC  
TGACCACCGGCAGGCATTACTCCCTTAGACCCCTTTGAAGTCCCACTTCTTAACACA



GCAGTCCTGCTTGCCTCTGGCGTAACTGTTACCTGAGCACACCACAGCATTATAGAG  
GGTAAACGAAAACAACTATTCAATCTCTTGCTCTTACAATCTTACTCGGGGGGTAC  
TTCACTTTCCTTCAAGGCCTAGAGTATCACGAAGCCCCCTTCACCATTGCAGACGGA  
GTTTACGGCGCTACATTCTTTGTTGCCACCGGCTTCCACGGACTACACGTCTTAATTG  
GCACGTCATTCTTAGCCGTTTGTCTATTACGCCAAATTCTTCACCATTTCACATCAAA  
CCACCACCTTTGGGTTTGAAGCAGCCGCATGATACTGACACTTCGTAGACGTCGTCTG  
ACTTTTCCTCTATATCTCTATTTACTGATGAGGATCTTAATGGCCAGTCTACGTAAAT  
CCCACCCTCTTCTAAAAATCGCAAACGATGCTTTAGTCGACCTCCCAGCCCCCTCTA  
ATATCTCTGTTTGATGAAACTTTGGGTCTCTTTTAGGACTCTGTTTAATTACCCAAAT  
TGCAACCGGCTTATTTCTAGCCATACACTACACATCAGACATTGCTACTGCCTTCAC  
CTCCGTAGCCACATCTGTCGAGACGTCAACTACGGCTGACTTATCCGAAGCATTCA  
TGCCAACGGCGCATCATTCTTTTTTCATTTGCCTCTACCTTCATATTGGTCGAGGTCTA  
TACTATGGCTCTTACCTCTATAAAGAAACATGAACTGTTGGGGTTATTCTCCTCCTTC  
TCGTAATAATAACAGCCTTCGTTGGATACGTCCTCCCTTGAGGACAAATGTCATTTT  
GAGGTGCAACCGTTATTACCAACCTTCTATCTGCCGTCCCCTACGTCGGAAACACCC  
TGGTCCAATGGATCTGAGGTGGTTTTTCTGTAGACAATGCTACCCTCACCCGGTTCTT  
TGCCTTCCACTTCCTCTTCCCCTTCATCATCGCTGCCGCAACGTTAATTCATCTACTCT  
TTCTTCACGAACTGGCTCAAACAACCCAACCGGGCTAAACTCAGACTCCGACAAA  
GTTCCCTTTCACCCCTACTTCACTTACAAGGACCTCTTGGCTTTGCAGTCCTTCTTAC  
TGCATTAGCATCCCTAGCCCTATTTTCCCCAAATCTCTTAGGAGACCCAGATAACTTT  
ACCCCTGCAAATCCGCTTGTTACTCCCCCACACATTAAGCCAGAGTGATACTTCCTG  
TTTGCCTATGCTATTCTCCGCTCCATTCCAAACAACTTGGAGGAGTACTTGCCCTTT  
TATTCTCAATCTTAGTTCTTATGCTCGTCCCCTTCCTTCATACCTCTAAACAACGAAG  
CCTGATATTCCGTCCCCTAACACAATTTTTGTTCTGATCTTTAGTAGCAGACGTTATG  
ATTCTAACTTGAATTGGAGGAATGCCCGTAGAACACCCCTTCGTTATCATTGGACAA  
GTAGCGTCTCTCCTTTACTTCTCCCTCTTCCTAGTCCTGATCCCAACAGCAGGTTGAC  
TAGAGAATAAAGTCCTTGGATGAAAATATGATTTCAACTCTCATTACGCATATTATC  
AACCCTACTAACCTTTATTGTACCTGTATTGCTAGCCGTAGCATTCCCTTACCCTCCTTG  
AACGAAAAGTGCTAGGCTACATACAACCTCCGAAAAGGGCCAAACATCGTAGGGCCT  
TACGGCCTCCTTCAACCTATTGCTGATGGTGTAACCTCTTTATTAAAGAACCCATTC  
GACCTTCGACCGCATCACCCGTCCTATTCTCCTGGCCCCCTATGCTCGCTCTCACACT  
AGCCCTAACCTTTGAGCCCCCATACTTTCCCGTACCCTGTCTGTTGACCTTAACCTA  
GGTATTTTATTTATTCTAGCCCTATCTAGCCTTGCAGTATATTCTATTCTGGGCTCCG  
GCTGAGCATCTAATTCAAAATATGCCCTAGTAGGGGCACTGCGGGCTGTCGCACAA  
ACAATTTCTTACGAAGTTAGCCTTGGACTCATCTTGCTAAACATTATCATCTTTACCG  
GAGGCTTCACACTTCAAACCTTTAACACAGCCCAAGAGGCCATTTGACTAGTAGTGC  
CCGCTTGACCACTGGCTGCCATATGATATATCTCCACTCTTGCCGAAACAAACCGTG  
CACCCTTCGACTTAACAGAAGGAGAGTCTGAGCTTGTCTCGGGCTTCAACGTAGAGT  
ACGCAGGCGGACCCTTCGCCTTATTCTTCTTGCCGAATATTCAAATATTCTCCTAAT  
AAATACCCTGTCCGCTACACTATTTTTAGGGGGCTCCACATTCCATCTATCCCAGA  
ATTAACCAGTATCAATATTATGACTAAAGCAGCCCTTCTGTCAATTGTCTTCCTATGA  
GTCCGAGCTTCGTACCCGCGGTTCCGTTACGACCAACTTATGCACCTCATTGAAAA  
AACTTTCTTCCACTGACTTTGGCACTAGTTATCTGACACTTGGCGCTCCCTATTGCAT  
TCGCTGGTCTCCCACCACAACTATAGATGAACCCCTACATCTTGACCACTCTTCTATT  
TGGTTTGGGCCTAGGAACAACACTCACGTTTGCAAGCTCACACTGGCTCCTCGCTTG  
AATAGGACTTGAGATTAATACACTAGCCATTATTCCCCTAATAGCCCAACATCACCA  
CCCCCGGGCAGTCGAAGCTACCACTAAGTACTTTCTCGCACAAGCCACAGCAGCCG  
CCACCCTCCTGTTTGCGAGTACTACCAACGCTTGACTCACAGGCCAATGGGACATTC

AACAGATAACACATCCCCTCCCAACAACAATGATTGTTATTGCCCTCGCACTAAAAG  
TCGGACTGGCACCAATGCACTCTTGACTTCCCGAAGTACTCCAAGGACTAGACCTAA  
CCACCGGACTTATCCTCTCAACCTGACAAAACTTGCACCCTTTGCCCTCTTACTACA  
AATTCAAACAACAACCCTACGCCTCTAATCATTATTGGCTTACTATCCACGCTCGTT  
GGTGGCTGAGGTGGTCTCAACCAAACCCAGTTACGCAAAGTCCTCGCCTACTCCTCA  
ATTGCCACCTTGGCTGAATAATGCTGATCGTTCAATTTTCACCCCTCCTTGCCCTTC  
TCACCCCTCCTCACGTACTTTCTATGACTTTCTCAGCATTCTTAATTTTTAAAGTAAAT  
AAAGCCACCACTGTCAATGCCCTCGCAATCTCGTGAACAAAGACTCCTGCCCTCACA  
GCCCTAGCACCCCTGGTTTTACTATCCCTCGGCGGCCTTCCCCCCCCTTACCGGCTTCA  
TGCCCAAGTGATTTATTCTTCAGGAAGTACTAAGCAAGACCTTCCACACTTGCCAC  
CCTCGCCGCTTTAACTGCCCTCTTGAGTCTCTACTTCTACCTCCGTCTCTCGTATGCA  
ATAACCCTCACAATATTCCCCAACAACCTCATTGGCGTCACTCCCTGACGATTCTAC  
TCCCCCAATTTACGCTTCCCCTCGCCGTCTCCACTGCAGCAACCACCCCTTCTTCTCC  
CACTAGCCCCCGCTGCCGTAGCACTACTGGTCACCTATGAGCCTTCTTCTAACCATC  
ATTTGATTGCCACCCCTCCTCTCGACAGTACTTGCCCTTGTGTCTTTTGATTACCCC  
AAATTACACCAGACCACGAAAACTATCACCTTACGAGTGCGGCTTTGACCCGATA  
GGATCCGCCCCGACTGCCTTTTTCACTGCGGTTTTTCTCATCGCCATCCTCTTTCTTCT  
ATTCGATTTAGAAATTGCTCTCCTCCTCCCTCTTCCATGAGGAGACCAACTAGCATC  
ACCACTACTGACATTCACCTGAGCTACAGCTGTCTAGCCCTTCTAACCCTTGGCCTC  
ATTTACGAATGAATGCAAGGGGGTCTAGAATGGGCGGAATATGCTAAAAGTCCTAA  
TCCAACACTTATGCTAATCCCAACAGCCTGGTTACTCAAACCCAACTGACTCTGAC  
CCATGACTTTAATGTATAGCTTTTGCATCTCCTTGGTCAGCCTTTCGTGACTAAAAAA  
CCTCTCAGAAACCGGCTGATCGTCACTTAGCCTCTTTATAGCTACCGACTCCCTATCG  
ACCCCCCTCCTCGTTCTTACATGCTGATTACTCCCCTAATAATTTTGGCAAGCCAGA  
AACACACAGCCTTAGAACCTCTTAGTCGCCAGCGCATGTACATCACTTCTCGCCT  
CCTCCAGTTCTTCTTAATCCTAGCATTTAGCGCCACCGAACTGGTAATGTTTTACGTA  
ATATTTGAAGCCACCCTTATCCCCACGCTAATCATTATCACCCGCTGAGGAAACCAA  
ACAGAACGTCTAAACGCAGGAACCTACTTTCTCTTCTATACATTAGCGGGCTCACTC  
CCCCTTCTCGTTGCTTTACTCCTACTCCAAAACACATCCGGCACCCCTATCGTTGTTAA  
CCGTTCACTACACGGACCCGCTCGCTCTCGTCTTATGCAGACAACTATGATGAGCA  
GGCTGTCTTTTAGCATTCCTGGTTAAAATACCCCTCTACGGAGTCCACCTATGGCTCC  
CTAAAGCCCATGTTGAAGCTCCAATTGCAGGCTCAATAATCCTTGCAGCAGTTCTAC  
TGAAGCTAGGGGGATACGGCATGATCCGCATGATAACGATATTGGAACCTCTAACT  
AAGGAATTAAGCTACCCCTTCATTGTCTTTGCACTTTGAGGGGTAATTATAACTGGC  
TCAATTTGTCTACGCCAGACAGACCTTAAGTCCTTAATTGCCTACTCATCAGTCAGC  
CACATGGGCCTAGTGGCTGGGGGAATTCTTATTCAATCACCCCTGAGGCTTAACAGGA  
GCCCTCACCCCTCATAATTGCACACGGTCTTACTTCATCAGCCCTCTTCTGCTTGGCAA  
ACACAACTATGAACGAACCCACAGTCGAACAATGGTCCTGGCGCGAGGGCTTCAA  
GTAGCCCTACCACTAATAGCCACTTGATGGTTTTATTCTAGCTTGGCCAACCTAGCTC  
TGCCACCACTACCCAACCTCATGGGGGAGCTGATAATTATCACTTCTTTATTCAACT  
GGTCCTGGTGAACCTCTGGCATTAAACCGGTGCAGGCACTCTAATCACAGCTGGTTACT  
CCCTTTACATATTCTTAATAACTCAACGGGGGCCCTCTCCCAACACATGTCATTGCACT  
TGAGCCATCTCACACCCGAGAACACCTTCTTATTGCCTTCACCTTATCCCCTTAATTC  
TGCTCGTACTTAAGCCCGAGCTGATCTGAGGCTGAACTGCCTATGACCCCCACACAC  
TTTGCCCTTCTCCTCAGCCTTTCTTCTGGGTTTAAACAGGCCTGGCATTCCACCGGTTTC  
ACCTCCTTTCCGCTCTATTGTGCCTTGAAGGAATAATACTATCCCTATTTATTGCTCT  
TTCCCTATGAACGCTCCAACCTTGATTCAACCAGCTTTTCAGCATCTCCAATACTTCTG  
CTTGCATTTTTCAGCCTGCGAAGCAAGCGCCGGTCTCGCCCTATTAGTAGCCACTGCT

CGAACCCACGGGACCGACCGATTACAAAGCCTAAATCTTCTCCAATGCTAAATGTAC  
CCCACCTCCCTAATGATTTTCATCGAGCCTGATCACAATCTTTGCATTACTAGCCTATC  
CTTTAATCACCACGATCCGTCCTACACCTCGAGGCCCTCAATGAGCTACCACCCATG  
TCAAAACAGCTGTAAAAATAGCTTTCTTTGTTAGTCTGCTACCTCTGACCCTATTTCT  
TAATGAGGGCGCAGAAACAATCGTTACTAATTGAACCTGAATAAATACTAACTCCTT  
CAATATCAACATTAGCTTGAAATTTGATTTCTACTCAATTATTTTTACACCCATTGCC  
CTCTACGTAACCTTGGTCCATCCTAGAGTTTCGCATCATGATACATGCACGCAGACCCA  
CACATGAACCGCTTCTTTAAATACCTCCTGACGTTTCTGATTGCCATAATCGTCCTAG  
TAACTGCAAACAATATGTTTCAACTATTTATCGGCTGGGAGGGAGTGGGGATCATAT  
CGTTCTTACTTATTGGATGGTGGTTCGGACGGGGCGGATGCTAACACTGCAGCGCTTC  
AAGCAGTAATTTACAACCGAGTAGGAGACATCGGACTTATCTTCGCCATGGCTTGAA  
TAGCAGCAAACCTAAACTCCTGAGAGATACAACAAATCTTTGCAACCACCAAGGAC  
ATAGACTTAACCTACCCTCTTCTCGGACTCATCATTGCAGCAACTGGCAAATCGGCT  
CAATTTCGGACTTCACCCTTGACTACCCTCCGCTATGGAGGGTCCCACACCGGTCTCT  
GCCCTACTTCATTCTAGCACTATGGTCGTTGCCGGCATTTTCTGCTAGTACGAATAA  
GCCCCCTCCTGGAAAACAACCAAACCGCCCTCACAACCTGCCTATGCCTCGGAGCTC  
TTACAACACTATTCACTGCAACCTGTGCCCTCACGCAAAATGATATTAATAAAAAATCG  
TCGCATTCTCTACATCCAGCCAGCTTGGGCTTATAATGGTAACCATTGGTCTAAACC  
AACCACAACCTAGCATTTCTTCACATCTGTACACATGCCTTCTTCAAGGCCATACTGTT  
TTTATGCTCCGGATCTATTATCCACAGCCTAAATGACGAACAAGATATCCGCAAAAT  
AGGGGGCATAACCCACCTTGACCTTTTACATCCTCTTGCCTAACTATTGGCAGCCT  
CGCCCTCACAGGAACCCCTTCTTGGCTGGCTTCTTCTCTAAAGATGCCATCATCGA  
AGCATTGAACACATCCCACCTAAACGCCTGAGCCCTAACCTTAACCTCCTAGCCAC  
CTCTTTCACAGCAATCTACAGCTTTCGAGTAGTATTTTTTGTACCCATGGGCCACCCC  
CGATTTAGTCCCTCTCTCCGATCAACGAAAACAACCCAGCAGTAATTAACCCACTTA  
AGCGACTAGCATGGGGAAGTATCGTTGCAGGCTTACTAATTACCTCTAATATTACAC  
CCTTAATAAACCCCTGTCATATCTATGCCGCCTCTCCTTAACCTAGCTGCTCTTGCAGT  
TACAATCATCGGCCTTCTTGTGCTATAGAGCTCGCCATATTAACCAACAAGCAATA  
TGAGCCAATACCCGGCACGACATACATCACTTCTCTGCCTTATTAGGCTTCTTCCCCG  
GGGTCATACACCGCCTAACCCCTGTATTGCTCTTCTTCTAGGCCAAAACATTGCTA  
ACCAAACAGTAGATCAGACATGATTAGAAAAAACAGGCCCCAAAGCCATTGAATCC  
GCTAACCGACCTCTAGTGTCTCTACAAGTAATATTCAACGGGGGGGTGATCAAAACA  
TATCTTCCCTCTTCTCCTAACACTAGCCCTTATAATCCCCATATTCATCACCTAATG  
ACTTTTCGCTATATATTTAGTTTTATTTTCTTGTGTTGGGGTGTAGTTGCAGTTGCTTC  
TAATCCGTCCCCTTATTTTGTGCTTTGGGTTTGGTTGTGGTAGCTGGCATGGGGTGT  
GGTATATTAGTTGGGCATGGAGGGCCCTTTTTGTCACTAGTCTGTTCTTAATTTACT  
TAGGCGGGATGTTAGTTGTATTTGCATATTCAGCAGCGTTAGCTGCTGAGCCGTACC  
CAGAGAGCTGGGGTAGTTGGTCGGTAATGGTCTACGGTTGTCTATACAGGAGGAGT  
ATTATAGTTTCTGGATTGTTTTGAGGGGGGTGGTATGAATCTTCTTGGGTCTTAGCAG  
ATGAGTTGGGGGAGTTTTCCGTATTTTCGAGGGGGATATCGGAGGGGTAGCCTTAATAT  
ACTCTTCTGGGGGGTGGTTGTTAATCACTAGTGCATGGGTATTGCTCTTAACCTTTGTT  
TGTAGTCCTTGAGTTAACCGGGGTATGAGCCGAGGGGCGTTGCGACGGTTT"/>

<sequence id="seq\_Hippoglossus\_stenolepis\_AM7491281" spec="Sequence"  
taxon="Hippoglossus\_stenolepis\_AM749128" totalcount="4"  
value="ATGATACTAAGCTTCTTTGACCAATTTATATCCCCTTCATACCTCGGCATCCC  
ACTAATTGCACTAGCGATTAGCCTGCCTTGAATTCTGTTCCCAACCCCGCAAGCCGC  
TGATTAAACAACCGCGTACTAACACTTCAAGGGTGATTTATTAGCCGCTTCACCTCG  
CAACTTCTTCTACCCCTAAACCCCGGAGGCCACAAGTGGGCAGTTCTATTACCTCG

TTAATGTTTTCTTTTCTATCAACATGCTAGGACTCCTTCCATACACCTTCACACCAA  
CGACCCAACTCTCCCTTAATATAGGCCTCGCAGTACCCCTTTGATTAGCAACTGTCA  
TTATGGGATACGAAATCAACCAACGCATGCCCTAGGCCACCTTCTTCCAGAAGGCAC  
CCCCACTGCCCTCATCCCTGTACTTATTATCATTGAAACAATTAGCCTATTCATTCTGA  
CCCCTCGCTCTCGGTGTCCGACTAACAGCAAATCTCACAGCAGGCCACCTCCTCATT  
CAACTCATTGCAACAGCTGCCTTCGTCCTTCTTCCCCTCATACCTGTTGTTGCTATCT  
TAACAACGGTGGTCTCTTCTCCTCACCTACTAGAAGTAGCCGTTGCCATGATTC  
AAGCTTATGTCTTTGTTCTACTCCTAAGCCTATATCTACAAGAGAACGTTTAATGCCT  
CAACTGAACCCCGCACCCCTGATTTGCAATTTTAGTTTTCTCTTGAATAATCTTTTTAA  
CTGTTATTCCCCCAAAGTTTTAGCACACACCTATCCTAATGAACCCACCTCCCAA  
GCACACAAAAACAAAACAGAGCCCTGAAACTGACCATGATACTAAGTGGCAATCAC  
ACGTTGATTTTTCTCGACCAATCACAAAGACATCGGCACCCTCTATCTCGTATTTGGT  
GCCTGAGCCGGAATAGTGGGGACAGGCCTAAGTCTGCTTATTCGGGCAGAACTAAG  
CCAACCCGGGGCTCTCCTGGGAGACGACCAAATTTATAATGTAATCGTCACCGCACA  
CGCCTTTGTAATAATCTTTTTTATAGTAATACCCATTATGATTGGGGGGTTTCGGAAAC  
TGGCTTATTCCACTAATAATTGGGGCCCCAGATATGGCGTTCCCTCGAATGAATAAT  
ATGAGTTTCTGACTTCTTCCCCCTCCTTCTCCTCCTCTTAGCCTCTTCAGGTGTTGA  
AGCCGGAGCAGGTACCGGATGAACCGTATACCCCCCACTAGCTGGCAATTTAGCCC  
ACGCCGGAGCATCCGTAGACCTGACAATCTTCTCACTTCACCTTGCAGGAATTTTCAT  
CAATTCTGGGGGCAATTAACCTTTATTACTACTATCATTAAACATGAAACCCACAACAG  
TCACTATGTACCAAATCCCCTTATTTGTTTGAGCCGTTCTTATTACAGCCGTACTTCT  
TCTTCTATCCCTGCCCGTTTTAGCCGCAGGAATTACAATACTACTAACAGACCGCAA  
CCTTAACACGACCTTCTTTGACCCTGCCGGAGGAGGTGACCCCATCCTCTACCAACA  
CCTATTCTGATTCTTTGGTCACCCAGAGGTATACATTCTTATTCTCCCGGGCTTCGGA  
ATAATTTCTCACATTGTTGCATACTATGCAGGTAAGAAAGAACCTTTTGGCTACATG  
GGGATAGTCTGAGCTATAATGGCCATTGGACTCCTGGGGTTCATTGTCTGGGCCCCAT  
CACATATTTACAGTCGGAATAGATGTAGACACACGAGCCTACTTTACCTCTGCCACA  
ATAATCATTGCGATTCCAACCTGGCGTAAAAGTCTTTAGCTGACTCGCAACCCTCCAT  
GGAGGAAGCATTAAATGAGAAACACCCCTTCTATGAGCCCTCGGCTTTATTTTCCTC  
TTTACAGTAGGCGGTCTCACTGGCATTGTCTTAGCTAACTCCTCTCTCGATATTGTT  
TGCATGACACATACTATGTAGTCGCTCACTTCCACTATGTACTATCTATGGGTGCTGT  
ATTTGCAATCGTTGCCGCCTTCGTCCACTGGTTTCCATTATTTACAGGCTATACCCTT  
CACTCCACATGAACAAAAATCCACTTCGGCCTGATATTTATTGGGGTCAATCTAACA  
TTCTTCCCCCAACATTTTCTGGGCCTGGCCGGAATACCCCGACGGTACTCAGACTAC  
CCAGATGCATACACCCTTTGAAACACTGTTTCATCAATCGGGTCCCTAATGTCCCTC  
GTTGCTGTAAATTTTATTTTATTTCATTATTTGAGAAGCATTACAGCCAAACGAGAAG  
TCGGAGCAGTAGAACTAACTGCAACTAACATTGAATGACTTTACGGCTGCCCTCCGC  
CCTACCACACATTTGAAGAGCCCGCATTCGTACAAGTTCGTATAAACTAAATGGCAC  
ATCCCTCACAACTCGGATTTCAAGACGCAGCTTCACCCTTAATAGAAGAATACTTC  
ACTTCCACGACCACGCCTTAATAATTGTAATTCTCATTAGCACAAATAGTACTTTATAT  
TATTGCGGCTATAGTCACAGCCAACTAACAGATAAACTTGTACTAGACTCTCAAGA  
AATTGAAATTATCTGAACAGTTCTCCCAGCTGTTATTCTTATCCTTATCGCCCTACCA  
TCCATCCGAATTTTGTACTTAATAGACGAAATTAATGACCCCCACCTGACAATTA  
GCCATTGGCCACCAGTGATACTGAAGCTACGAATACACAGACTACGAAGACCTCGG  
TTTTGACTCATAATAATCCCCACACAAGACCTGACCCCTGGACAATTCCGACTACT  
AGAAGCAGACCACCGAATAGTAATCCCGGTAGAATCCCCAATTCGCGTTTTAATCTC  
GGCTGAAGATGTCTTACATTCCCTGGGCAGTCCCCTCTCTAGGCGTAAAAGTTGACGC  
CGTACCTGGACGATTGAACCAAGCAACCTTTATTGTTAGCCGACCAGGCGTATTTTT

CGGACAATGTTCTGAGATTTGCGGGGCTAACCATAGTTTTATACCCATTGTTGTAGA  
AGCAGTCCCCCTTGAACACTTTGAGAACTGGTCTTCACTAATAATTGAAGACGCCTA  
TGGCCCATCAAGCACACCCCTACCACATAGTCGACCCCAGCCCATGACCCCTAACAG  
GGGCTATTGCTGCCCTATTGATAACATCTGGCCTTGCTATCTGATTCCACTTCCACTC  
CACAACCCTGATAACTATTGGGACAATCCTTCTCACCTTAACAATCTTCCAATGATG  
ACGGGACGTCGTACGGGAAGGCACATTTCAAGGACACCACACTCCCCCGTTCAA  
AAGGCCTCCGATATGGTATAATTTTATTTATTACCTCAGAAGTCCTATTCTTCTTAGG  
CTTCTTCTGAGCCTTTTACCATTCAAGCCTAGCACCTACCCCTGAGCTAGGCGGCTTC  
TGACCACCGGCAGGCATTACTCCCTTAGACCCCTTTGAAGTCCCACCTTCTTAACACA  
GCAGTCCTGCTTGCTTCTGGCGTAACTGTTACCTGAGCACACCACAGCATTATAGAG  
GGTAAACGAAAACAACTATTCAATCTCTTGCTCTTACAATCTTACTCGGGGGGTAC  
TTCACCTTTCCTTCAAGGCCTAGAGTATCACGAAGCCCCCTTCACCATTGCAGACGGA  
GTTTACGGCGCTACATTCTTTGTTGCCACCGGCTTCACGGACTACACGTCTTAATTG  
GCACGTCATTCTTAGCCGTTTGTCTATTACGCCAAATTCTTTCACCATTTCACATCAA  
CCACCCTTTGGGTTTGAAGCAGCCGCATGATACTGACACTTCGTAGACGTCGTCTG  
ACTTTTCCTCTATATCTCTATTTACTGATGAGGATCTTAATGGCCAGTCTACGTAAAT  
CCCACCCTCTTCTAAAAATCGCAAACGATGCTTTAGTCGACCTCCCAGCCCCCTCTA  
ATATCTCTGTTTGATGAACTTTGGGTCTCTTTTAGGACTCTGTTTAATTACCCAAAT  
TGCAACCGGCTTATTTCTAGCCATACACTACACATCAGACATTGCTACTGCCTTCAC  
CTCCGTAGCCACATCTGTCGAGACGTCAACTACGGCTGGCTTATCCGAAGCATTCA  
TGCCAACGGCGCATCATTCTTTTCATTTGCCTCTACCTTCATATTGGTCGAGGTCTA  
TACTATGGCTCTTACCTCTATAAAGAAACATGAACTGTTGGGGTTATTCTCCTCCTTC  
TCGTAATAATAACAGCCTTCGTTGGATACGTCCTCCCTTGAGGACAAATGTCGTTTT  
GAGGTGCAACCGTTATTACCAACCTTCTATCTGCCGTCCCCTACGTCGGAAACACCC  
TGGTCCAATGGATCTGAGGTGGTTTTTCTGTAGACAATGCTACCCTCACCCGGTTCTT  
TGCTTCCACTTCCTCTTCCCCTTCATCATCGCTGCCGCAACGTTAATTCATCTACTCT  
TTCTTCACGAACTGGCTCAAACAACCCAACCGGGCTAAACTCAGACTCCGACAAA  
GTTCCCTTTCACCCCTACTTCACTTACAAGGACCTCTTGGCTTTGCAGTCCTTCTTAC  
TGCATTAGCATCCCTAGCCCTATTTTCCCCAAATCTCTTAGGAGACCCAGATAACTTT  
ACCCCTGCAAATCCGCTTGTTACTCCTCCACACATTAAGCCAGAGTGATACTTCCTG  
TTTGCCTATGCTATTCTCCGCTCCATTCCAAACAACTTGGAGGAGTACTTGCCCTTT  
TATTCTCAATCTTAGTTCTTATGCTCGTCCCCTTCCTTCATACCTCTAAACAACGAAG  
CCTGATATTCCGTCCCCTAACACAATTTTTGTTCTGATCTTTAGTAGCAGACGTTATG  
ATTCTAACTTGAATTGGAGGAATGCCCCGTAGAACACCCCTTCGTTATCATTGGACAA  
GTAGCGTCTCTCCTTTACTTCTCCCTCTTCCTAGTCCTGATCCCAACAGCAGGTTGAC  
TAGAGAATAAAGTCCTTGGATGAAAATATGATTTCAACTCTCATTACGCATATTATC  
AACCCACTAACCTTTATTGTACCTGTATTGCTAGCCGTAGCATTCCCTACCCTCCTTG  
AACGAAAAGTGCTAGGCTACATACAACCTCCGAAAAGGGCCAAACATCGTAGGGCCT  
TACGGCCTCCTTCAACCTATTGCTGATGGTGTAACCTCTTTATTAAGAACCATTTC  
GACCTTCGACCGCATCACCCGTCCTATTCCTCCTGGCCCCTATGCTCGCTCTCACACT  
AGCCCTAACCTTTGAGCCCCCATACTTTCCCGTACCCTGTCGTGGACCTTAACCTA  
GGTATTTTATTTATTCTAGCCCTATCTAGCCTTGACAGTATATTCTATTCTGGGCTCCG  
GCTGAGCATCTAATTCAAAATATGCCCTAGTAGGGGCACTGCGGGCTGTCGCACAA  
ACAATTTCTTACGAAGTTAGCCTTGGACTCATCTTGCTAAACATTATCATCTTTACCG  
GAGGCTTCACACTTCAAACCTTTAACACAGCCCAAGAGGCCATTTGACTAGTAGTGC  
CCGCTTGACCACTGGCTGCCATATGATATATCTCCACTCTTGCCGAAACAAACCGTG  
CACCTTCGACTTAACAGAAGGAGAGTCTGAACTTGTCTCGGGCTTCAACGTAGAGT  
ACGCAGGCGGACCCTTCGCCTTGTTCTTCTTGGCCGAATATTCAAATATTCTCCTAAT

AAATACCCTGTCCGCTACACTATTTTTAGGGGCTCCACATTCCATCTATCCCAGA  
ATTAACCAGTATCAATATTATGACTAAAGCAGCCCTTCTGTCAATTGTCTTCCTATGA  
GTCCGAGCTTCGTACCCGCGATTCCGTTACGACCAACTTATGCACCTCATTTGAAAA  
AACTTTCTTCCACTGACTTTGGCACTAGTTATCTGACACTTGGCGCTCCCTATTGCAT  
TCGCTGGTCTCCCACCACAACCTATAGATGAACCCCTACATCTTGACCACTCTTCTATT  
TGGTTTGGGCCTAGGAACAACACTCACGTTTGCAAGCTCACACTGGCTCCTCGCTTG  
AATAGGACTTGAGATTAATACACTAGCCATTATTCCCCTAATAGCCCAACATCACCA  
CCCCGGGCAGTCGAAGCTACCACTAAGTACTTTCTCGCACAAGCCACAGCAGCCG  
CCACCCTCCTGTTTGGGAGTACTACCAACGCTTGACTCACAGGCCAATGGGACATTC  
AACAGATAACACATCCCCTCCCAACAACAATGATTGTTATTGCCCTCGCACTAAAAG  
TCGGACTGGCACCAATGCACTCTTGACTTCCCGAAGTACTCCAAGGACTAGACCTAA  
CCACCGGACTTATCCTCTCAACCTGACAAAAACTTGACCCCTTTGCCCTCTTACTACA  
AATTCAAACAACAACCCTACGCCTCTAATCATTATTGGCTTACTATCCACGCTCGTT  
GGTGGCTGAGGTGGTCTCAACCAAACCCAGTTACGCAAAGTCCTCGCCTACTCCTCA  
ATTGCCACCTTGGCTGAATAATGCTGATCGTTCAATTTTCACCCCTCCTTGCCCTTC  
TCACCCCTCCTCACGTACTTTCTATGACTTTCTCAGCATTCTTAATTTTTAAAGTAAAT  
AAAGCCACCACTGTCAATGCCCTCGCAATCTCGTGAACAAAGACTCCTGCCCTCACA  
GCCCTAGCACCCCTGGTTTTACTATCCCTCGGCGGCCTTCCCCCCCCTTACCGGCTTCA  
TACCCAAGTGATTTATTCTTCAGGAAGTACTAAGCAAGACCTTCCACACTTGCCAC  
CCTCGCCGCTTTAACTGCCCTCTTGAGTCTCTACTTCTACCTCCGTCTCTCGTATGCA  
ATAACCCTCACAATATTCCCCAACAACTCATTGGCGTCACTCCCTGACGATTCTAC  
TCCCCCAATTTACGCTTCCCCTCGCCGTCTCCACTGCAGCAACCACCCTTCTTCTCC  
CACTAGCCCCCGCTGCCGTAGCACTACTGGTCACCTATGAGCCTTCTTCTAACCATC  
ATTTGATTGCCACCCTCCTCTCGACAGTACTTGCCCTTGTGTCCTTTTGATTACCCC  
AAATTACACCAGACCACGAAAACTATCACCTTACGAGTGCGGCTTTGACCCGATA  
GGATCCGCCCCGACTGCCTTTTTCACTGCGGTTTTTCTCATCGCCATCCTCTTTCTTCT  
ATTCGATTTAGAAATTGCTCTCCTCCTCCCTCTTCCATGAGGAGACCAACTAGCATC  
ACCACTACTGACATTCACCTGAGCTACAGCTGTCCTAGCCCTTCTAACCCTTGGCCTC  
ATTTACGAATGAATGCAAGGGGGTCTAGAATGGGCGGAATATGCTAAAAGTCCTAA  
TCCAACACTTATGCTAATCCCAACAGCCTGGTTACTCAAACCCAACTGACTCTGAC  
CCATGACTTTAATGTATAGCTTTTGCATCTCCTTGGTCAGCCTTTCTGTGACTAAAAAA  
CCTCTCAGAAACCGGCTGATCGTCACTTAGCCTCTTTATAGCTACCGACTCCCTATCG  
ACCCCCCTCCTCGTTCTTACATGCTGATTACTCCCACTAATAATTTTGGCAAGCCAGA  
AACACACAGCCTTAGAACCTCTTAGTCGCCAGCGCATGTACATCACACTTCTCGCCT  
CCTCCAGTTCTTCCTAATCCTAGCATTTAGCGCCACCGAACTGGTAATGTTTTACGTA  
ATATTTGAAGCCACCCTTATCCCCACGCTAATCATTATCACCCGCTGAGGAAACCAA  
ACAGAACGTCTAAACGCAGGAACCTACTTTCTCTTCTATACATTAGCGGGCTCACTC  
CCCCTTCTCGTTGCTTTACTCCTACTCCAAAACACATCCGGCACCCCTATCGTTGTAA  
CCCTTCACTACACGGACCCGCTCGCTCTCGTCTTATGCAGACAACTATGATGAGCA  
GGCTGTCTTTTAGCATTCCTGGTTAAAATACCCCTCTACGGAGTCCACCTATGGCTCC  
CTAAAGCCCATGTTGAAGCTCCAATTGCAGGCTCAATAATCCTTGCAGCAGTTCTAC  
TGAAGCTAGGGGGATACGGCATGATCCGCATGATAACGATATTGGAACCTCTAACT  
AAGGAATTAAGCTACCCCTTCATTGTCTTTGCACTTTGAGGGGTAATTATAACTGGC  
TCAATTTGTCTACGCCAGACAGACCTTAAGTCCTTAATTGCCTACTCATCAGTCAGC  
CACATGGGCCTAGTGGCTGGGGGAATTCTTATTCAATCACCTGAGGCTTAACAGGA  
GCCCTCACCTCATAATTGCACACGGTCTTACTTCATCAGCCCTCTTCTGCTTGGCAA  
ACACAACTATGAACGAACCCACAGTCGAACAATGGTCCTGGCGCGAGGACTTCAA  
GTAGCCCTACCACTAATAGCCACTTGATGGTTTTATTCTAGCTTGGCCAACCTAGCTC

TGCCACCACTACCCAACCTCATGGGGGAGCTGATAATTATCACTTCTTTATTCAACT  
GGTCCTGGTGAACCTCTGGCATTAAACCGGTGCAGGCACTCTAATCACAGCTGGTTACT  
CCCTTTACATATTCTTAATAACTCAACGGGGGCCCTCTCCCAACACATGTCATTGCACT  
TGAGCCATCTCACACCCGAGAACACCTTCTTATTGCCTTCACCTTATCCCCTTAATTC  
TGCTCGTACTTAAGCCCGAGCTGATCTGAGGCTGAACTGCCTATGACCCCCACACAC  
TTTGCCTTCTCCTCAGCCTTTCTTCTGGGTTTAAACAGGCCTGGCATTCCACCGGTTTC  
ACCTCCTTTCCGCTCTATTGTGCCTTGAAGGAATAATACTATCCCTATTTATTGCTCT  
TTCCCTATGAACGCTCCAACCTTGATTCAACCAGCTTTTCAGCATCTCCAATACTTCTG  
CTTGCATTTTTCAGCCTGCGAAGCAAGCGCCGGTCTCGCCCTATTAGTAGCCACTGCT  
CGAACCCACGGGACCGACCGATTACAAAGCCTAAATCTTCTCCAATGCTAAATGTAC  
CCCACCTCCCTAATGATTTTCATCGAGCCTGATCACAATCTTTGCATTACTAGCCTATC  
CTTTAATCACCACGATCCGTCCTACACCTCGAGGCCCTCAATGAGCTACCACCCATG  
TCAAAACAGCTGTAAAAATAGCTTTCTTTGTTAGTCTGCTACCCCTGACCCTATTTCT  
TAATGAGGGGCGCAGAAACAATCGTTACTAATTGAACCTGAATAAATACTAACTCCTT  
CAATATCAACATTAGCTTGAAATTTGATTTCTACTCAATTATTTTTACACCCATTGCC  
CTCTACGTAACCTTGGTCCATCCTGGAGTTCGCATCATGATACATGCACGCAGACCCA  
CACATGAACCGCTTCTTTAAATACCTCCTGACGTTTCTGATTGCCATAATCGTCCTAG  
TAACTGCAAACAATATGTTTCAACTATTTATCGGCTGGGAGGGAGTGGGGATCATAT  
CGTTCTTACTTATTGGATGGTGGTTCGGACGGGCGGATGCTAACACTGCAGCGCTTC  
AAGCAGTAATTTACAACCGAGTAGGAGACATCGGACTTATCTTCGCCATGGCTTGAA  
TAGCAGCAAACCTAAACTCCTGGGAGATACAACAAATCTTTGCAACCACCAAGGAC  
ATAGACTTAACCTACCCTCTTCTCGGACTCATCATTGCAGCAACTGGCAAATCGGCT  
CAATTTCGGACTTCACCCTTGACTACCCTCCGCTATGGAGGGTCCCACACCGGTCTCT  
GCCCTACTTCATTCTAGCACTATGGTCGTTGCCGGCATTTCCTGCTAGTACGAATAA  
GCCCCCTCCTGGAAAACAACCAACCGCCCTCACAACCTGCCTATGCCTCGGAGCTC  
TTACAACACTATTCACTGCAACCTGTGCCCTCACGCAAAATGATATTAATAAAAAATCG  
TCGCATTCTCTACATCCAGCCAGCTTGGGCTTATAATGGTAACCATTGGTCTAAACC  
AACCACAACCTAGCATTTCTTCACATCTGTACACATGCCTTCTTCAAGGCCATACTGTT  
TTTATGCTCCGGATCTATTATCCACAGCCTAAATGATGAACAAGATATCCGCAAAAT  
AGGGGGCATAACCCACCTTGCACCTTTCACATCCTCTTGCCTAACTATTGGCAGCCT  
CGCCCTCACAGGAACCCCCTTCTTGGCTGGCTTCTTCTCTAAAGATGCCATCATCGA  
AGCATTGAACACATCCCACCTAAACGCCTGAGCCCTAACCTTAACCTCCTAGCCAC  
CTCTTTCACAGCAATCTACAGCTTTCGAGTAGTATTTTTTGTACCCATGGGGCCACCCC  
CGATTTAGTCCCTCTCTCCGATCAACGAAAACAACCCAGCAGTAATTAACCCACTTA  
AGCGACTAGCATGGGGAAGTATCGTTGCAGGCTTACTAATTACCTCTAATATTACAC  
CCTTAAAAACCCCTGTCATATCTATGCCTCCTCTCCTTAAACTAGCTGCTCTTGCAGT  
TACAATCATCGGCCTTCTTGTGCTATAGAGCTCGCCATATTAACCAACAAGCAATA  
TGAGCCAATAACCGGCACGACATACACCACTTCTCTGCCTTATTAGGCTTCTTCCCC  
GGGGTCATACACCGCCTAACCCCTGTATTGCTCTTCTTCTAGGCCAAAACATTGCT  
AACCAAACAGTAGATCAGACATGATTAGAAAAAACAGGCCCAAAGCCATTGAATC  
CGCTAACCGACCTCTAGTGTCTCTACAAGTAATATTCAACGGGGGGGTGATCAAAAC  
ATATCTTCCCTCTTCCTCCTAACACTAGCCCTTATAATCCCCATATTCATCACCTAAT  
GACTTTCGCTATATATTTAGTTTTATTTTCTCTTGTGTTGGGGTTAGTTGCAGTTGCTT  
CTAATCCGTCCCCTTATTTTGCTGCTTTGGGTTTGGTTGTGGTAGCTGGCATGGGGTG  
TGGTATATTAGTTGGGCATGGAGGGGCCCTTTTTGTCACTAGTCCTGTTCTTAATTTAC  
TTAGGCGGGATGTTAGTTGTATTTGCATATTCAGCAGCGTTAGCTGCTGAGCCGTAC  
CCAGAGAGCTGGGGTAGTTGGTTCGGTAATGGTCTACGGTTGTCTATACAGGAGGAG  
TATTATAGTTTCTGGGTTGTTTTGAGGGGGGTGGTATGAATCTTCTTGGGTCTTAGCA

GATGAGTTGGGGGAGTTTTCCGTGTTTCGAGGGGATATCGGAGGGGTAGCCTTAATA  
TACTCTTCTGGGGGGTGGTTGTTAATCACTAGTGCATGGGTATTGCTCTTAACCTTTGT  
TTGTAGTCCTTGAGTTAACCGGGGTATGAGCCGAGGGGCGTTGCGACGGTTT"/>

<sequence id="seq\_Hippoglossus\_stenolepis\_AM7491291" spec="Sequence"  
taxon="Hippoglossus\_stenolepis\_AM749129" totalcount="4"  
value="ATGATACTAAGCTTCTTTGACCAATTTATATCCCCTTCATACCTCGGCATCCC  
ACTAATTGCACTAGCGATTAGCCTGCCTTGAATTCTGTTCCCAACCCCGCAAGCCGC  
TGATTAAACAACCGCGTACTAACACTTCAAGGGTGATTTATTAGCCGCTTCACCTCG  
CAACTTCTTCTACCCCTAAACCCCGGAGGCCACAAGTGGGCAGTTCTATTACCTCG  
TTAATGTTTTCTTTTCTATCAACATGCTAGGACTCCTTCCATACACCTTCACACCAA  
CGACCCAACTCTCCCTTAATATAGGCCTCGCAGTACCCCTTTGATTAGCAACTGTCA  
TTATGGGATACGAAATCAACCAACGCATGCCCTAGGCCACCTTCTTCCAGAAGGCAC  
CCCCACTGCCCTCATCCCTGTACTTATTATCATTGAAACAATTAGCCTATTCATTGCA  
CCCCTCGCCCTCGGTGTCCGACTAACAGCAAATCTCACAGCAGGCCATCTCCTTATT  
CAACTCATTGCAACAGCTGCCTTCGTCCTTCTTCCCCTCATACCTGTTGTTGCTATCT  
TAACAACGGTGGTCCTCTTCTCCTCACCTACTAGAAGTAGCCGTTGCCATGATTC  
AAGCTTATGTCTTTGTTCTACTCCTAAGCCTATATCTACAAGAGAACGTTTAATGCCT  
CAACTGAACCCCGCACCTGATTTGCAATTTTAGTTTTCTTGAATAATCTTTTTAA  
CTGTTATTCCCCCAAAGTTTTAGCACACACCTATCCTAATGAACCCACCTCCCAA  
GCACACAAAAACAAAACAGAGCCCTGAAACTGACCATGATACTAAGTGGCAATCAC  
ACGTTGATTTTTCTCGACCAATCACAAAGACATCGGCACCCTCTATCTCGTATTTGGT  
GCCTGAGCCGGAATAGTGGGGACAGGCCTAAGTCTGCTTATTCGGGCAGAACTAAG  
CCAACCCGGGGCTCTCCTGGGAGACGACCAAATTTATAATGTAATCGTCACCGCACA  
CGCCTTTGTAATAATCTTTTTTATAGTAATACCCATTATGATTGGGGGGTTCGGAAAC  
TGGCTTATTCCACTAATAATTGGGGCCCCAGATATGGCGTTCCCTCGAATGAATAAT  
ATGAGTTTCTGACTTCTTCCCCCTCCTTTCTCCTCCTCTTAGCCTCTTCAGGTGTTGA  
AGCCGGAGCAGGTACCGGATGAACCGTATACCCCCCACTAGCTGGCAATTTAGCCC  
ACGCCGGAGCATCCGTAGACCTGACAATCTTCTCACTTCACCTTGCAGGAATTTTCAT  
CAATTCTGGGGGCAATTAACCTTTATTACTACTATCATTAACATGAAACCCACAACAG  
TCACTATGTACCAAATCCCCTTATTTGTTTGAGCCGTTCTTATTACAGCCGTACTTCT  
TCTTCTATCCCTGCCCCTTTAGCCGCAGGAATTACAATACTACTAACAGACCGCAA  
CCTTAACACGACCTTCTTTGACCCTGCCGGAGGAGGTGACCCCATCCTCTACCAGCA  
CCTATTCTGATTCTTTGGTCACCCAGAGGTATACATTCTTATTCTCCCGGGCTTCGGA  
ATAATTTCTCACATTGTTGCATACTATGCAGGTAAGAAAGAACCTTTTGGCTACATG  
GGGATAGTCTGAGCTATAATGGCCATTGGACTCCTGGGGTTCATTGTCTGGGCCCAT  
CACATATTTACAGTCGGAATAGATGTAGACACACGAGCCTACTTTACCTCTGCCACA  
ATAATCATTGCGATTCCAACCTGGCGTAAAAGTCTTTAGCTGACTCGCAACCCTCCAT  
GGAGGAAGCATTAAATGAGAAACACCCCTTCTATGAGCCCTCGGCTTTATTTTCCTC  
TTTACAGTAGGCGGTCTCACTGGCATTGTCTTAGCTAACTCCTCTCTCGATATTGTTT  
TGCATGACACATACTATGTAGTCGCTCACTTCCACTATGTACTATCTATGGGTGCTGT  
ATTTGCAATCGTTGCCGCCTTCGTCCACTGGTTTCCATTATTTACAGGCTATACCCTT  
CACTCCACATGAACAAAAATCCACTTCGGCCTGATATTTATTGGAGTCAATCTAACA  
TTCTTCCCCAACATTTTCTGGGCCTGGCCGGAATACCCCGACGGTACTCAGACTAC  
CCAGATGCATACACCCTTTGAAACACTGTTTCATCAATCGGGTCCCTAATGTCCCTC  
GTTGCTGTAATTTTATTTTATTCATTATTTGAGAAGCATTACAGCCAAACGAGAAG  
TCGGAGCAGTAGAACTAACTGCAACTAACATTGAATGACTTTACGGCTGCCCTCCGC  
CCTACCACACATTTGAAGAGCCCGCATTCGTACAAGTTCGTATAAACTAAATGGCAC  
ATCCCTCACAACTCGGATTTCAAGACGCAGCTTCACCCTTAATAGAAGAACTACTTC



ACTTCCACGACCACGCCTTAATAATTGTAATTCTCATTAGCACAAATAGTACTTTATAT  
TATTGCGGCTATAGTCACAGCCAACTAACAGATAAACTTGTACTAGACTCTCAAGA  
AATTGAAATTATCTGAACAGTTCTCCCAGCTGTTATTCTTATCCTTATCGCCCTACCA  
TCCATCCGAATTTTGTACTTAATAGACGAAATTAATGACCCCCACCTGACAATTA  
GCCATTGGCCACCAGTGATACTGAAGCTACGAATACACAGACTACGAAGACCTCGG  
TTTTGACTCATAATAATCCCCACACAAGACCTGACCCCTGGACAATTCCGACTACT  
AGAAGCAGACCACCGAATAGTAATCCCGGTAGAATCCCCAATTCGCGTTTTAATCTC  
GGCTGAAGATGTCTTACATTCTGGGCAGTCCCCTCTCTAGGCGTAAAAGTTGACGC  
CGTACCTGGACGATTGAACCAAGCAACCTTTATTGTTAGCCGACCAGGCGTATTTTT  
CGGACAATGTTCTGAGATTTGCGGGGCTAACCATAGTTTTATACCCATTGTTGTAGA  
AGCAGTCCCCCTTGAACACTTTGAGAACTGGTCTTCACTAATAATTGAAGACGCCTA  
TGGCCCATCAAGCACACCCATACCACATAGTCGACCCCAGCCCATGACCCCTAACA  
GGGGCTATTGCTGCCCTATTGATAACATCTGGCCTTGCTATCTGATTCCACTTCCACT  
CCACAACCCTGATAACTATTGGGACAATCCTTCTCACCTTAACAATCTTCCAATGAT  
GACGGGACGTCGTACGGGAAGGCACATTTCAAGGACACCACACTCCCCCGTTCAA  
AAAGGCCTCCGATATGGTATAATTTTATTTATTACCTCAGAAGTCCTATTCTTCTTAG  
GCTTCTTCTGAGCCTTTTACCATTCAAGCCTAGCACCTACCCCTGAGCTAGGCGGCTT  
CTGACCACCGGCAGGCATTACTCCCTTAGACCCCTTTGAAGTCCCCTTCTTAACAC  
AGCAGTCCTGCTTGCCTCTGGCGTAACTGTTACCTGAGCACACCACAGCATTATAGA  
GGGTAAACGAAAACAACTATTCAATCTCTTGCTCTTACAATCTTACTCGGGGGGTA  
CTTCACTTTCTTCAAGGCCTAGAGTATCACGAAGCCCCCTTACCATTGCAGACGG  
AGTTTACGGCGCTACATTCTTTGTTGCCACCGGCTTCCACGGACTACACGTCTTAATT  
GGCACATCATTCTTAGCCGTTTGTCTATTACGCCAAATTCTTACCATTTCACATCAA  
ACCACCCTTTGGGTTTGAAGCAGCCGCATGATACTGACACTTCGTAGACGTCGTCT  
GACTTTTCTCTATATTTCTATTTACTGATGAGGATCTTAATGGCCAGTCTACGTAAA  
TCCCACCCTCTTCTAAAAATCGCAAACGATGCTTTAGTCGACCTCCCAGCCCCCTCT  
AATATCTCTGTTTGATGAACTTTGGGTCTCTTTTAGGACTCTGTTTAATTACCCAAA  
TTGCAACCGGCTTATTTCTAGCCATACACTACACATCAGACATTGCTACTGCCTTCAC  
CTCCGTAGCCACATCTGTCGAGACGTCAACTACGGCTGGCTTATCCGAAGCATTCA  
TGCCAACGGCGCATCATTCTTTTCATTTGCCTCTACCTTCATATTGGTCGAGGTCTA  
TACTATGGCTCTTACCTCTATAAAGAAACATGAACTGTTGGGGTTATTCTCCTCCTTC  
TCGTAATAATAACAGCCTTCGTTGGATACGTCCTCCCTTGAGGACAAATGTCGTTTT  
GAGGTGCAACCGTTATTACCAACCTTCTATCTGCCGTCCCCTACGTCGGAAACACCC  
TGGTCCAATGGATCTGAGGTGGTTTTTCTGTAGACAATGCTACCCTCACCCGGTTCTT  
TGCCTTCCACTTCCTCTTCCCCTTCATCATCGCTGCCGCAACGTTAATTCATCTACTCT  
TTCTTCACGAACTGGCTCAAACAACCAACCGGGCTAACTCAGACTCCGACAAA  
GTTCCCTTTCACCCCTACTTCACTTACAAGGACCTCTTGGCTTTGCAGTCCTTCTTAC  
TGCATTAGCATCCCTAGCCCTATTTTCCCCAAATCTCTTAGGAGACCCAGATAACTTT  
ACCCCTGCAAATCCGCTTGTTACTCCCCACACATTAAGCCAGAGTGATACTTCCTG  
TTTGCCTATGCTATTCTCCGCTCCATTCCAAACAACTTGGAGGAGTACTTGCCCTTT  
TATTCTCAATCTTAGTTCTTATGCTCGTCCCCTTCCTTCATACCTCTAAACAACGAAG  
CCTGATATTCCGTCCCCTAACACAATTTTGTCTGATCTTTAGTAGCAGACGTTATG  
ATTCTAACTTGAATTGGAGGAATGCCCGTAGAACACCCCTTCGTTATCATTGGACAA  
GTAGCGTCTCTCCTTTACTTCTCCCTCTTCCTAGTCCTGATCCCAACAGCAGGTTGAC  
TAGAGAATAAAGTCCTTGGATGAAAATATGATTTCAACTCTCATTACGCATATTATC  
AACCCTACTAACCTTTATTGTACCTGTATTGCTAGCCGTAGCATTCTTACCCTCCTTG  
AACGAAAAGTGCTAGGCTACATACAACTCCGAAAAGGGCCAAACATCGTAGGGCCT  
TACGGCCTCCTTCAACCTATTGCTGATGGTGTAACCTCTTTATTAAAGAACCCATTC

GACCTTCGACCGCATCACCCGTCCTATTCTCCTGGCCCCCTATGCTCGCTCTCACACT  
AGCCCTAACCCCTTTGAGCCCCCATACCTTTCCCGTACCCTGTCTGGACCTTAACCTA  
GGTATTTTATTTATTCTAGCCCTATCTAGCCTTGCAGTATATTCTATTCTGGGCTCCG  
GCTGAGCATCTAATTCAAAATATGCCCTAGTAGGGGCACTGCGGGCTGTCGCACAA  
ACAATTTCTTACGAAGTTAGCCTTGGACTCATCTTGCTAAACATTATCATCTTTACCG  
GAGGCTTCACACTTCAAACCTTTAACACAGCCCAAGAGGCCATTTGACTAGTAGTGC  
CCGCTTGACCACTGGCTGCCATATGATATATCTCCACTCTTGCCGAAACAAACCGTG  
CACCTTCGACTTAACAGAAGGAGAGTCTGAACTTGTCTCGGGCTTCAACGTAGAGT  
ACGCAGGCGGACCCTTCGCCTTGTTCTTCTTGCCGAATATTCAAATATTCTCCTAAT  
AAATACCCTGTCCGCTACACTATTTTTAGGGGCTCCACATTCCATCTATCCCAGA  
ATTAACCAGTATCAATATTATGACTAAAGCAGCCCTTCTGTCAATTGTCTTCCTATGA  
GTCCGAGCTTCGTACCCGCGATTCCGTTACGACCAACTTATGCACCTCATTGAAAA  
AACTTTCTTCCACTGACTTTGGCACTAGTTATCTGACACTTGGCGCTCCCTATTGCAT  
TCGCTGGTCTCCACCACTATAGATGAACCCCTACATCTTGACCACTCTTCTATT  
TGGTTTGGGCCTAGGAACAACACTCACGTTTGCAAGCTCACACTGGCTCCTCGCTTG  
AATAGGACTTGAGATTAATACTAGCCATTATTCCCCTAATAGCCCAACATCACCA  
CCCCGGGCAGTCGAAGCTACCACTAAGTACTTTCTCGCACAAGCCACAGCAGCCG  
CCACCCTCCTGTTTGGCAGTACTACCAACGCTTGACTCACAGGCCAATGGGACATTC  
AACAGATAACACATCCCCTCCCAACAACAATGATTGTTATTGCCCTCGCACTAAAAG  
TCGGACTGGCACCAATGCACTCTTGACTTCCCGAAGTACTCCAAGGACTAGACCTAA  
CCACCGGACTTATCCTCTCAACCTGACAAAACTTGACCCCTTTGCCCTCTTACTACA  
AATTCAAACAACAACCCTACGCCTCTAATCATTATTGGCTTACTATCCACGCTCGTT  
GGTGGCTGAGGTGGTCTCAACCAAACCCAGTTACGCAAAGTCCTCGCCTACTCCTCA  
ATTGCCACCTTGGCTGAATAATGCTGATCGTTCAATTTTCACCCCTCCTTGCCCTTC  
TCACCCTCCTCACGTACTTTCTATGACTTTCTCAGCATTCTTAATTTTAAAGTAAAT  
AAAGCCACCACTGTCAATGCCCTCGCAATCTCGTGAACAAAGACTCCTGCCCTCACA  
GCCCTAGCACCCCTGGTTTTACTATCCCTCGGCGGCCTTCCCCCCTTACCGGCTTCA  
TACCCAAGTGATTTATTCTTCAGGAAGTACTAAGCAAGACCTTCCACACTTGCCAC  
CCTCGCCGCTTTAACTGCCCTCTTGAGTCTCTACTTCTACCTCCGTCTCTCGTATGCA  
ATAACCCTCACAATATTCCCCAACAACTCATTGGCGTCACTCCCTGACGATTCTAC  
TCCCCCAATTTACGCTTCCCCTCGCCGTCTCCACTGCAGCAACCACCTTCTTCTCC  
CACTAGCCCCCGCTGCCGTAGCACTACTGGTCACCTATGAGCCTTCTTCTAACCATC  
ATTTGATTGCCACCCTCCTCTCGACAGTACTTGCCCTTGTGTCCTTTTGATTACCCC  
AAATTACACCAGACCACGAAAACTATCACCTTACGAGTGCGGGCTTTGACCCGATA  
GGATCCGCCCCGACTGCCTTTTTTCACTGCGGTTTTTCTCATCGCCATCCTCTTTCTTCT  
ATTCGATTTAGAAATTGCTCTCCTCCTCCCTCTTCCATGAGGAGACCAACTAGCATC  
ACCACTACTGACATTCACCTGAGCTACAGCTGTCCTAGCCCTTCTAACCCTTGGCCTC  
ATTTACGAATGAATGCAAGGGGGTCTAGAATGGGCGGAATATGCTAAAAGTCCTAA  
TCCCAACACTTATGCTAATCCCAACAGCCTGGTTACTCAAACCCAACTGACTCTGAC  
CCATGACTTTAATGTATAGCTTTTGCATCTCCTTGGTCAGCCTTTTCGTGACTAAAAAA  
CCTCTCAGAAACCGGCTGATCGTCACTTAGCCTCTTTATAGCTACCGACTCCCTATCG  
ACCCCCCTCCTCGTTCTTACATGCTGATTACTCCCCTAATAATTTTGGCAAGCCAGA  
AACACACAGCCTTAGAACCTCTTAGTCGCCAGCGCATGTACATCACACTTCTCGCCT  
CCTCCAGTTCTTCCTAATCCTAGCATTTAGCGCCACCGAACTGGTAATGTTTTACGTA  
ATATTTGAAGCCACCCTTATCCCCACGCTAATCATTATCACCCGCTGAGGAAACCAA  
ACAGAACGTCTAAACGCAGGAACCTACTTTCTTCTATACATTAGCGGGCTCACTC  
CCCCTTCTCGTTGCTTTACTCCTACTCCAAAACACATCCGGCACCCCTATCGTTGTAA  
CCCTTCACTACACGGACCCGCTCGCTCTCGTCTTATGCAGACAACTATGATGAGCA

GGCTGTCTTTTAGCATTCCTGGTTAAAATACCCCTCTACGGAGTCCACCTATGGCTCC  
CTAAAGCCCATGTTGAAGCTCCAATTGCAGGCTCAATAATCCTTGCAGCAGTTCTAC  
TGAAGCTAGGGGGATACGGCATGATCCGCATGATAACGATATTGGAACCTCTAACT  
AAGGAATTAAGCTACCCCTTCATTGTCTTTGCACTTTGAGGGGTAATTATAACTGGC  
TCAATTTGTCTACGCCAGACAGACCTTAAGTCCTTAATTGCCTACTCATCAGTCAGC  
CACATGGGCCTAGTGGCTGGGGGAATTCTTATTCAATCACCTGAGGCTTAACAGGA  
GCCCTCACCTCATAATTGCACACGGTCTTACTTCATCAGCCCTCTTCTGCTTGGCAA  
ACACAACTATGAACGAACCCACAGTCGAACAATGGTCCTGGCGCGAGGACTTCAA  
GTAGCCCTACCACTAATAGCCACTTGATGGTTTATTTCTAGCTTGGCCAACCTAGCTC  
TGCCACCACTACCCAACCTCATGGGGGAGCTGATAATTATCACTTCTTTATTCAACT  
GGTCCTGGTGAACCTCTGGCATTAAACCGGTGCAGGCACTCTAATCACAGCTGGTTACT  
CCCTTTACATATTCTTAATAACTCAACGGGGGCCCTCTCCCAACACATGTCATTGCACT  
TGAGCCATCTCACACCCGAGAACACCTTCTTATCGCCTTCACCTTATCCCCTTAATTC  
TGCTCGTACTTAAGCCCGAGCTGATCTGAGGCTGAACTGCCTATGACCCCCACACAC  
TTTGCCTTCTCCTCAGCCTTTCTTCTGGGTTTAAACAGGCCTGGCATTCCACCGGTTTC  
ACCTCCTTTCCGCTCTATTGTGCCTTGAAGGAATAATACTATCCCTATTTATTGCTCT  
TTCCCTATGAACGCTCCAACCTTGATTCAACCAGCTTTTCAGCATCTCCAATACTTCTG  
CTTGCATTTTTCAGCCTGCGAAGCAAGCGCCGGTCTCGCCCTATTAGTAGCCACTGCT  
CGAACCCACGGGACCGACCGATTACAAAGCCTAAATCTTCTCCAATGCTAAATGTGC  
CCCACCTCCCTAATGATTTTCATCGAGCCTGATCACAATCTTTGCATTACTAGCCTATC  
CTTTAATCACACGATCCGTCCTACACCTCGAGGCCCTCAATGAGCTACCACCCATG  
TCAAAACAGCTGTAAAAATAGCTTTCTTTGTTAGTCTGCTACCCCTGACCCTATTTCT  
TAATGAGGGCGCAGAAACAATCGTTACTAATTGAACCTGAATAAATACTAACTCCTT  
CAATATCAACATTAGCTTGAAATTTGATTTCTACTCAATTATTTTTACACCCATTGCC  
CTCTACGTAACCTGGTCCATCCTGGAGTTTCGCATCATGATACATGCACGCAGACCCA  
CACATGAACCGCTTCTTTAAATACCTCCTGACGTTTCTGATTGCCATAATCGTCCTAG  
TAACTGCAAACAATATGTTTCAACTATTTATCGGCTGGGAGGGAGTGGGGATCATAT  
CGTTCTTACTTATTGGATGGTGGTTCGGACGGGCGGATGCTAACACTGCAGCGCTTC  
AAGCAGTAATTTACAACCGAGTAGGAGACATCGGACTTATCTTCGCCATGGCTTGAA  
TAGCAGCAAACCTAAACTCCTGAGAGATACAACAAATCTTTGCAACCACCAAGGAC  
ATAGACTTAACCTACCCTCTTCTCGGACTCATCATTGCAGCAACTGGCAAATCGGCT  
CAATTTCGGACTTCACCCTTGACTACCCTCCGCTATGGAGGGTCCCACACCGGTCTCT  
GCCCTACTTCATTCTAGCACTATGGTCGTTGCCGGCATTTCCTGCTAGTACGAATAA  
GCCCCCTCCTGGAAAACAACCAACCGCCCTCACAACCTGCCTATGCCTCGGAGCTC  
TTACAACACTATTCACTGCAACCTGTGCCCTCACGCAAAATGATATTAATAAAAAATCG  
TCGCATTCTCTACATCCAGCCAGCTTGGGCTTATAATGGTAACCATTGGTCTAAACC  
AACCACAACCTAGCATTTCTTCACATCTGTACACATGCCTTCTTCAAGGCCATACTGTT  
TTTATGCTCCGGATCTATTATCCACAGCCTAAATGATGAACAAGATATCCGCAAAAT  
AGGGGGCATAACACACCTTGCACCTTTTACATCCTCTTGCCTAACTATTGGCAGCCT  
CGCCCTCACAGGAACCCCTTCTTGGCTGGCTTCTTCTCTAAAGATGCCATCATCGA  
AGCATTGAACACATCCCACCTAAACGCCTGAGCCCTAACCTTAACCTCCTAGCCAC  
CTCTTTCACAGCAATCTACAGCTTTCGAGTAGTATTTTTTGTACCATGGGGCCACCCC  
CGATTTAGTCCCTCTCTCCGATCAACGAAAACAACCCAGCAGTAATTAACCCACTTA  
AGCGACTAGCATGGGGAAGTATCGTTGCAGGCTTACTAATTACCTCTAATATTACAC  
CCTTAAAAACCCCTGTCATATCTATGCCTCCTCTCCTTAAACTAGCTGCTCTTGCAGT  
TACAATCATCGGCCTTCTTGTGCTATAGAGCTCGCCATATTAACCAACAAGCAATA  
TGAGCCAATACCCGGCACGACATACACCACTTCTCTGCCTTATTAGGCTTCTTCCCC  
GGGGTCATACACCGCCTAACCCCTGTATTGCTCTTCTTCTAGGCCAAAACATTGCT

AACCAAACAGTAGATCAGACATGATTAGAAAAAACAGGCCCAAAGCCATTGAATC  
CGCTAACCGACCTCTAGTGTCTCTACAAGTAATATTCAACGGGGGGTGATCAAAAC  
ATATCTTCCCTCTTCCTCCTAACACTAGCCCTTATAATCCCCATATTCATCACCTAAT  
GACTTTCGCTATATATTTAGTTTTATTTTCTCTTGTGTTGGGGTTAGTTGCAGTTGCTT  
CTAATCCGTCCCCTTATTTTGCTGCTTTGGGTTTGGTTGTGGTAGCTGGCATGGGGTG  
TGGTATATTAGTTGGGCATGGAGGGGCCCTTTTGTCACTAGTCCTGTTCTTAATTTAC  
TTAGGCGGGATGTTAGTTGTATTTGCATATTCAGCAGCGTTAGCTGCTGAGCCGTAC  
CCAGAGAGCTGGGGTAGTTGGTCGGTAATGGTCTACGGTTGTCTATACAGGAGGAG  
TATTATAGTTTCTGGATTGTTTTGAGGGGGGTGGTATGAATCTTCTTGGGTCTTAGCA  
GATGAGTTGGGGGAGTTTTCCGTATTTTCGAGGGGATATCGGAGGGGTAGCCTTAATA  
TACTCTTCTGGGGGGTGGTTGTTAATCACTAGTGCATGGGTATTGCTCTTAACCTTGT  
TTGTAGTCCTTGAGTTAACCGGGGTATGAGCCGAGGGGCGTTGCGACGGTTT"/>

<sequence id="seq\_Limanda\_aspera\_KP0130941" spec="Sequence"  
taxon="Limanda\_aspera\_KP013094" totalcount="4"  
value="ATGATACTAAGCTTCTTTGATCAATTTATGTCCCCCGTATTCCTGGGCATCCC  
CCTAATTGCCCTGGCAATTACACTGCCCTGAACGCTGTTCCCAGCCCCCTGTCTTCGCT  
GACTAAATAATCGTATAGTTTCACTTCAAGGATGATTCATTAGCGGCTTCACATCTC  
AACTTCTCCTCCCCTAAACCCAGCCGGACACAAGTGAGCCATTTTATTTGCCTCAT  
TAATCTTTTCTTTTCTATTAACATGCTCGGACTCCTTCCATACACATTTACACCTAC  
AACTCAACTCTCCCTTAACCTCGGCCTCGCAGTTCCACTCTGATTGGCAACTGTCATT  
ATGGCATGCGAAACCAGCCAACAGTCGCCCTAGGCCACCTTCTTCCAGAAGGGACC  
CCCCTCTTCTTATCCCAGTACTAATTATTATCGAAACAATTAGCCTGTTTATTCGAC  
CTCTCGCTCTTGGTGTTCGACTTACAGCAAATCTTACAGCTGGCCACCTGCTCATTCA  
ACTCATTGCAACAGCTGCCTTTGTTCTTCTTCCGCTTATGCCTGTCGTTGCTATTTTAA  
CAGCAACAGTTCTTCTCCTCCTAACTCTCCTAGAAAGTTGCCGTTGCTATAATTCAAGC  
CTACGTCTTTGTTTTACTCCTAAGTCTTTACCTACAAGAAAACGTCTAATGCCTCAAC  
TGGACCCCGCACCCCTGATTTGCAATTTTGGTTTTCTCTTGAATAATCCTTTTAACTGT  
TATTCCCCCAAAAGTTTTAGCTCACACCTACCCCAATGAGCCAACCTCCCAAAGCAC  
ACAAAAACAAAACAGAGCCCTGAACTGACCATGATACTAAGTGGAATCACACGT  
TGATTTTTCTCGACCAATCACAAAGACATCGGCACCCTCTATCTCGTATTTGGTGCCT  
GAGCCGGAATAGTGGGGACAGGTCTAAGTCTGCTCATTGAGCAGAACTCAGCCAA  
CCTGGGGCTCTCCTGGGAGACGATCAAATTTATAACGTGATCGTTACCGCACACGCC  
TTTGTAAATAATCTTCTTTATAGTAATACCAATTATGATCGGAGGGTTCGGAAACTGA  
CTTATCCCCTAATGATCGGGGCCCTGATATGGCATTCCCTCGAATGAACAACATG  
AGTTTCTGACTTCTGCCTCCATCCTTTCTTCTCCTCCTAGCCTCTTCAGGCGTAGAAG  
CCGGGGCTGGAACCTGGGTGAACTGTATATCCTCCGTTAGCTGGAAATCTAGCACACG  
CTGGAGCATCCGTAGACCTAACAATCTTTTCTCTTACCTTGCCGGGATTTTCATCAAT  
CCTGGGAGCAATCAACTTTATTACCACAATCATCAACATGAAACCTACAGCAGTAAC  
TATGTACCAAATTCCACTATTCGTGTGAGCCGTAATAATTACAGCCGTTCTTCTCCTC  
CTCTCCCTTCCAGTCTTAGCCGCTGGCATCACAATGCTACTGACAGACCGCAACCTA  
AACACAACCTTTCTTTGACCCTGCCGGAGGGGGTGACCCCATCCTCTATCAACACCTA  
TTCTGATTCTTTGGCCACCCAGAGGTATATATTTTAATTCTTCCAGGCTTCGGGATAA  
TTTCTCACATTGTTGCATATTATGCAGGTAAGAAAGAACCCTTTGGCTATATAGGAA  
TAGTCTGAGCTATGATGGCTATTGGACTCCTGGGCTTCATCGTATGGGCTCATCACA  
TGTTTACAGTTGGAATAGACGTGGACACACGAGCCTACTTTACTTCTGCCACAATGA  
TTATCGCCATCCCAACTGGCGTAAAAGTCTTTAGCTGACTCGCAACCCTCCACGGAG  
GAAGCATTAAAGTGAGAAACCCCACTTCTGTGAGCCCTAGGCTTTATTTTCCTGTTCA  
CAGTAGGAGGTCTTACTGGTATTGTCTTAGCTAATTCCTCTCTCGACATCGTCCTCCA

TGACACATACTATGTAGTAGCCCACTTCCACTATGTACTATCCATGGGTGCTGTGTTT  
GCAATCGTTGCCGCCTTCGTACACTGATTCCTTACAGGCTACACCTCCACT  
CCGCATGAACAAAAATTCACCTTTGGCCTCATGTTTGTAGGTGTAAATCTCACATTCTT  
CCCCAACATTTCTTGGCCTTGCCGGAATACCTCGACGGTACTCGGACTACCCAGA  
TGCATATACCCTTTGAAATACTGTCTCATCAATCGGATCACTAATGTCCCTCGTTGCT  
GTGATTTTATTTTTGTTTATTATTTGAGAAGCATTTACAGCCAAACGAGAAGTCGGG  
GCAGTAGAACTAACTTCACTAATATCGAATGACTCTACGGCTGCCCCCACCCTAT  
CACACATTTGAGGAGCCCGCATTCGTCCAAGTTCGTATAAACTAAATGGCACATCCG  
TCACAACCTGGGGTTTCAGGACGCAGCTTCCCCCTAATAGAAGAACTACTTCACTTC  
CATGATCACGCCTTAATAATTGTTATTCTCATCAGCGCAATAGTGCTTTATATTATTG  
TGGCAATGGTCACGGCCAACTAACCGACAAGCTTGCTTTAGACTCCCAAGAAATT  
GAAGTAATCTGGACAGTTCTCCAGCTATTATCCTAATTCTCATCGCCCTCCCGTCTC  
TCCGCATTTTATACCTGATAGACGAAATTAACGACCCCCATCTAACCATCAAAGCAT  
TAGGTCACCAATGATACTGAAGCTACGAATACACAGACTACCAAGACCTTGGTTTTG  
ACTCTTATATAATCCCAACACAAGACCTGACCCCTGGGCAGTTCCGACTACTTGAAG  
CAGATCACCGAATGGTGATTCCTGTTGAATCCCCAATTCGAGTCCTTATTTAGCTG  
AAGATGTTTTACATTCCTGAGCAGTCCCTCCCTGGGCGTAAAAGTTGATGCTGTAC  
CTGGCCGATTAAACCAAGCAACCTTTATTGTTAGCCGACCTGGCGTATTCTACGGCC  
AATGCTCTGAGATTTGCGGGGCAAACCACAGTTTTATACCCGTCGTTGTAGAAGCAG  
TCCCACTTGACCACTTTGAGAACTGGTCTTCGCTAATAATTGAAGACGCCTATGGCC  
CCTCAAGCGCACCCGTACCACATAGTCGACCCTAGCCCATGACCCCTCACGGGGGCT  
ATCGCTGCCCTATTGATAACATCTGGCCTTGCTATCTGATTCCACTTCCACTCTACCA  
CCCTAATAACTATTGGAACAGTCCTTCTTATTCTAACAGTCTTCCAGTGATGACGAG  
ATGTCGTTTCGAGAAGGTACATTCCAAGGACACCATAACCCCTCCCGTTCAAAAAGGCC  
TCCGATACGGTATGATCTTATTTATTACCTCAGAAGTCCTATTTTTCTTAGGCTTCTT  
CTGGGCTTTTTATCACTCAAGCCTCGCACCTACGCCTGAACTAGGAGGTTTCTGACC  
ACCCGCAGGCATCACACCTTTAGACCCATTTGAAGTCCCGCTTCTAAATACAGCAGT  
CCTACTTGCCTCTGGCGTAACTGTTACATGGGCACATCACAGTATTATAGAAGGCGA  
ACGAAAACAAGCTATCCAATCTCTTGCTCTCACAATTTTACTCGGTGGCTACTTTACC  
TTCTTCCAAGGCCTTGAATATCACGAAGCCCCCTTACCATTGCAGACGGAGTTTAT  
GGTGCCACATTCTTTGTTGCTACCGGCTTCCACGGACTTCACGTCTTAGTGGGCTCCT  
CTTTCTTAGCCGTTTGTTTATTACGCCAAATTCTGCACCACTTTACATCCGACCACCA  
TTTTGGCTTCGAGGCAGCCGCATGATACTGACACTTTGTAGACGTCGTCTGACTCTTC  
CTCTATATCTCTATTTACTGATGAGGATCTTAATGGCCAATCTCCGTAAATCCCACCC  
CCTCCTTAAATCGCAAACGATGCTCTAGTAGACCTCCAGCCCCCGCAAACATCTC  
TGTCTGATGAACTTCGGGTCTCTTTTAGGACTCTGCTTAGTAACCCAGATCGCTACC  
GGCTTATTCTTAGCCATACACTACACATCAGATATTGCTACTGCCTTTACCTCCGTCG  
CACACATCTGCCGGGACGTCAACTACGGCTGACTTATCCGAAGCATTCATGCCAATG  
GAGCATCATTCTTTTTCATTTGCATCTACCTTCATATTGGCCGTGGTCTCTACTATGG  
TTCTTACCTCTATAAAGAAACGTGAACTATTGGTGTTGTTCTTCTACTTCTCGTAATG  
ATGACCGCCTTCGTTGGTTACGTACTTCCTTGAGGACAAATGTCCTTTTGAGGTGCA  
ACCGTCATTACCAACCTTTTATCCGCAGTCCCTACGTTGGGGGCTCCCTTGTCCAAT  
GAATCTGAGGTGGCTTTTCTGTAGATAATGCAACCCTTACCCGATTCTTTGCATTCCA  
CTTCCTTTTCCCGTTCATTATCGCAGCCGCCACAGTAATTCATCTCCTCTTCCTCCAC  
GAAACCGGTTCAAACAACCCACCGGTTTAAACTCAAACCTCCGATAAAGTCCCATTT  
CACCTTACTTCACATACAAAGACCTTTTGGCTTTGCAGTCCTTCTTACTGCCCTAGC  
TTCCCTCGCCCTCTTCTCCCCAACCTTTTAGGAGACCCGGACAACCTTACCCCTGCA  
AACCACTTGTTACACCCCCACATATCAAGCCCGAATGATATTTCTGTTTGCCTAC

GCCATTCTCCGTTCCATTCCAAACAAACTTGGAGGTGTTCTTGCCCTCTTATTCTCCA  
TCCTAGTTCTCATACTTGTCCCCTTTCTCCACACCTCCAAACAACGGAGCCTTATGTT  
CCGCCCTGTAACACAGTTTCTGTTTTGGTCTTTAGTAGCTGACGTAATAATTCTGACT  
TGAATTGGAGGAATACCCGTTGAGCACCTTTTCGTTATCATTGGCCAAGTAGCATCT  
ATTATCTACTTCTCGCTCTTCCTAGTCCTTATCCCAACAGCAGGATGAATAGAAAAC  
AAAGTCCTCGGATGAAACTATGATTTCAACCCTCATTACGCATATTATTAACCCACT  
AGCCTTTATTGTCCCCGTCTTGTTAGCCGTAGCATTCCTGACTCTCCTTGAACGAAAG  
GTGCTAGGTTATATACAACCTCCGAAAAGGTCCCAATATCGTTGGGCCTTACGGCCTC  
CTTCAACCTATTGCTGACGGCGTAAACTCTTCATTAAGGAACCCGTTTCGCCCTTCA  
ACCTCCTCACCAGTTTTATTCTTTTGTACCCATACTTGCGCTAACGCTAGCCCTTG  
CACTTTGAGCCCCCATGCCTTTTCCATACCCTGTTGTGGACCTCAACCTGGGGATTTT  
ATTTATTCTAGCCTTGTCTAGCCTTGCAGTATACTCCATCCTCGGATCAGGCTGAGCA  
TCCAATTTCGAAGTATGCATTAATAGGAGCACTACGTGCTGTTGCACAAACAATTTCT  
TACGAGGTCAGCCTCGGACTCATCTTACTTAGCATCATTATCTTTGCAGGAGGGTTT  
ACACTCCAAACCTTTAACACAGCCCAAGAGGCCATTTGACTCGTAGTGCCCGCCTGA  
CCACTGGCTGCCATATGATACATCTCCACCCTTGCCGAAACAAACCGTGCACCATTC  
GACCTGACCGAGGGGGAATCTGAACTTGTCTCAGGCTTCAACGTAGAGTACGCAGG  
TGGACCCTTCGCTTTATTCTTTTTAGCCGAATATTCAAACATCCTCCTAATAAACACA  
CTGTCCGCAACACTATTTTTGGGCGCCTCGCACATTCCAAACATCCCAGAATTAACA  
AGCATCAACTTAATAACTAAAGCCGCCCTTCTCTCAGTTGTTTTTCTCTGGGTCCGAG  
CTTCGTACCCGCGGTTCCGTTATGACCAGCTTATACACCTCATTTGAAAAAATTTTCT  
TCCACTAACGCTGGCGCTGGTTATTTGACACTTAGCGCTCCCTATTGCATTTCGCTGGC  
CTCCACCTCAGCTGTAGATGAACCCCTACATCTTGACCACCCTTCTATTTGGTTTGG  
GCCTAGGTACAACACTGACATTTGCAAGCTCCCACTGACTTCTCGCGTGAATAGGCC  
TTGAAATTAATACTAGCCATTATTCCACTAATAGCCCAACACCACCACCCTCGGG  
CGGTTGAAGCCACTACTAAATACTTCCTGGCACAAGCCACAGCAGCGGCCACCCTCC  
TGTTTGCAAGCACCACCAACGCCTGAATTACCGGACAATGAGATGTTCAACAGATA  
ACACATCCGCTCCCCACAACAATAGTTGTGATCGCCCTAGCACTAAAAATTGGACTA  
GCCCCTATACACTCCTGACTCCCCGAAGTTCTTCAGGGCCTAAGCCTCACCACAGGT  
CTTATTTTATCAACCTGACAGAAGCTTGCACCTTTTGCTCTTCTATTACAAATTCAAA  
CGACAATCCTACGCCTCTAATCATTATTGGCCTTCTCTCTGCCCTTGTAGGGGGCTGA  
GGTGGTCTCAACCAAAACACAGCTGCGCAAAGTTCTTGCCCTACTCCTCAATCGCCAC  
CTTGGTTGAATAATACTTATCCTTCAATTTTCTCCACTCCTGAGCCTCCTTGCACTGC  
TGACATATTTTCTATGACCTTTTCAGCTTTCCTCATCTTCAAAGTAAACAAGGCCACT  
ACTGTTAATGCACTCGCCATCTCTTGGGCAAAAACCTCCGGCCCTCACAGCCCTAGCA  
CCCCTTGTTTTACTTTCCCTCGGGGGCCTTCCCCCACTTACCGGCTTTATACCAAAGT  
GGTTTATTCTTCAAGAACTTACCAAACAAGATTTACCACACTAGCTACTCTCGCTGC  
ACTAACTGCCCTCTTGAGCCTCTACTTCTACCTACGTCTCTCGTATGCTATGACCCTA  
ACGATATTTCCCAATAACCTCATTGGCATGACCCCTGACGATTCTCAACTCCCCAA  
TTTACCCTTCCCCTCGCCGTTTCCACTGCGGCGACCACCCTCCTCCTGCCATTGGCAC  
CTGCTGCCGTAGCACTCCTCGTCACCTATGAGCCTTCTTCTAACCATCATTTCATCA  
CCGCCCTCCTATCAACGGTACTTGCCATTGTGTCTTTTTGACTTCCCCAAATTACGCC  
GGATTATGAAAAGCTGTCACCGTACGAGTGTGGCTTTGACCCCATTTGGTTCCGCCCCG  
ACTACCCTTCTCGATGCGATTTTTTCTCATCGCCATCCTCTTTCTTCTGTTTCGACTTAG  
AAATTGCACTTCTCCTCCCGCTCCCCTGAGGCGACCAACTAGCGTCCCCTCTACTTAC  
ATTTACCTGAGCTGCAGCAGTTCTATCGCTCCTAACCCTTGGCCTCATCTACGAATG  
AGTACAAGGAGGCCTAGAATGGGCTGAATATGCTAAAAATTCTAATTCCAACACTT  
ATGCTAATCCCAACAGCCTGACTACTTAAACCTAGCTGGCTCTGGCCCATAACTTA

TTGTATAGCTTTTGCATCTCCTTAATTAGCCTCTCGTGACTAAAAAACCTCTCGGAAA  
CCGGCTGATCCTCACTCAACCTATTTATAGCCACCGACTCTTTATCAACCCCCCTCCT  
TGTCCTGACATGTTGGCTACTTCCGCTAATAATCTTAGCAAGCCAAAAACACACGGC  
CTCAGAGCCGCTCAGTCGGCAGCGCATGTATATTTGCTTCTCGCCTCCTTCAATTTT  
TCCTGATTCTAGCATTTAGCGCCACAGAGCTGGTGATGTTTTACGTAATATTTGAAG  
CTACCCTTATCCCGACACTGATCATTATCACTCGCTGAGGGAACCAAACAGAGCGCC  
TAAATGCGGGAACCTACTTCCTGTTCTATACCCTGGCTGGCTCACTTCCTCTTCTTGT  
TGCCTTGCTGCTACTCCAAAACACATCCGGAACCTCTCTCATTATTAACGCTCCACTAC  
ACGGACCCGCTCGCTGTCCTCCTATGCAGACAAATTATGATGAGCCGGATGTCTTCT  
AGCTTTTCTAGTTAAATGCCACTTTATGGCGTTACCTCTGACTTCCCAAAGCACAT  
GTTGAAGCCCCAATTGCAGGCTCAATAATCCTTGCAGCAGTTTTACTTAAGCTAGGA  
GGCTACGGCATAATCCGTATAATAACAATACTAGAGCCTCTAACCAAAGAATTAAG  
CTACCCCTTTATTATCTTTGCACTCTGAGGCGTAATCATGACCGGCTCAATTTGCCTA  
CGACAAACGGACCTTAAGTCATTAATTGCCTACTCCTCTGTTAGTCACATGGGCCTC  
GTGGCCGGAGGGATTCTCATTCAATCACCTGAGGGCTCACGGGTGCACTTACACTT  
ATAATCGCCACGGCCTCACCTCCTCAGCCCTATTTTGCCTAGCAAATACAACTAT  
GAACGAACACACAGCCGTACAATAGTATTAGCACGAGGACTTCAAGTGGCCTTACC  
CCTAATGGCCACTTGATGATTTGTCTCCAGCCTAGCCAACCTGGCCCTGCCCCCACT  
GCCTAACCTTATGGGGGAGCTGATGATTATCACCTCCCTTTTTGACTGGTCCTGATG  
AACACTGGCACTTACAGGGTCCGGGACTCTTATTACCGCTGGCTACAGCCTCTATAT  
ATTCTTAATGACTCAACGAGGTCTCTCCCAACACATGTAATTGCACTTGAACCCTC  
ACACACCCGAGAACATCTTCTTATTGCCTTCACCTCATCCCTCTTGTTCTCCTCGTTC  
TTAAGCCCGAGCTGATCTGAGGCTGAACTGCCTATGACCCCTACACACTTTGCCTTC  
TCCTCAGCCTTTTTTCTAGGTTTAAACAGGCCTGGCATTCCACCGGTCCCACCTCCTTT  
CCGCACTATTGTGCCTTGAAGGGATGATACTGTCCCTTTTTGTTGGCCTCTCCCTGTG  
AACTCTACAACACTAGACTCAACTAACTTTTCAGCATCTCCATTACTCCTGCTTGCGTTT  
TCAGCCTGTGAAGCAAGCGCCGGGCTCGCCCTTCTAGTAGCCACTGCCCGAACCCAC  
GGAAGTACCGACTGCAAAGCCTAAACCTCCTCCAATGCTAAATGCACCCACCTCC  
CTAATGATCTCATCAAGCTTGATTACAATCTTTGCATTACTAGCCTACCCACTGGCCA  
CCACATTCCGTCTACGCCTCAGGGGCTCAATGAGCCACATCTCATGTCAAAACAG  
CTGTAAAAATAGCTTTCTTTGTTAGCCTCTTACCCCTTGCCCTGTTCTTAATGAAGG  
TGCCGAGACAATTGTTACTAACTGGGCCTGAATGAACACTAACACCTTTAACATCAA  
CATCAGCCTAAAATTTGACTTTTACTCGATTATCTTTACTCCTATTGCCCTCTACGTT  
ACTTGGTCCATTCTAGAGTTTCGCATCATGATACATACACGCTGACCCACACGTAAAC  
CGCTTTTTTCAAGTACCTTTTAAACGTTTCTTATTGCTATAATTATCCTAGTAACTGCAA  
ACAACATATTTCAACTCTTTATCGGGTGAGAGGGCGTAGGGATCATATCGTTCCCTCC  
TCATTGGATGATGGTACGGACGGGCGGATGCTAATACTGCAGCACTTCAAGCAGTA  
CTGTACAACCGGGTCGGGGACATCGGACTCATCTTCGCCATAGCTTGAATAGCAACA  
AACCTAAACTCCTGGGAAATACAACAAATCTTTGCGACCTCTAAGGGTATGGACTTA  
ACCTACCCCTCATTGGACTAATCATCGCGGCAACCGGGAAATCAGCTCAATTTGGG  
CTCCACCCTTGGCTGCCCTCAGCCATGGAAGGTCCTACACCGGTATCTGCCCTACTT  
CATTCTAGCACTATAGTCGTGGCCGGCATCTTTCTCCTGGTACGAATGAGCCCACTT  
CTGGAGAATAACCCGGCTGCCCTCACAACCTGCCTCTGTCTCGGGGGCCCTTACGACC  
CTGTTCACTGCAACCTGCGCCCTCACACAAAATGATATTAATAAAAAATCGTCGCATTT  
TCTACATCTAGTCAGCTCGGGCTCATAATGGTAACCATTTGGGTAAACCAACCTCAA  
CTAGCATTTCTACACATCTGTACACACGCCTTCTTTAAAGCCATACTATTTCTTTGCT  
CGGGGTCTATTATTCACAGCCTAAACGATGAACAGGACATCCGAAAAATAGGCGGT  
ATGCACCACCTTGCACCTTTTACATCCTCTTGCTTGACAATTGGAAGCCTCGCACTTA

CGGGAACCTCCCTTCTTAGCTGGTTTCTTCTCTAAAGATGCCATCATCGAAGCATTAA  
ACACATCCCATTAAACGCCTGAGCCCTAACCCCTAACCCCTCCTGGCCACATCTTTTA  
CAGCAATCTACAGCTTCCGCGTAATTTTCTTTGTGCCTATGGGCCACCCCCGATTAA  
TCCATTTCCCCTATTAACGAAAATAACCCCGCAGTGATTAATCCACTTAAACGCCTA  
GCATGAGGAAGTATCCTTGCAGGACTACTAATTACCTCAAATATTACACCCCTTAAA  
ACCCCGTGATGTCCATGCCTCCCCTCCTAAACTAGCTGCCCTTGCAGTTACAATT  
ATCGGCCTACTTATTGCCATAGAACTCGCTATATTAACCAACAAGCAATTTAAATCA  
ACACCTGTCTTAACGTACACAACTTCTCTAATACTAGGCTTTTTCCCCGCCATTGT  
ACACCGCCTAACCCCTAAATTAGGGGCTCGTTTTCGGCCAGGACATTGCTAACCAGAT  
AGTGGATCAAACCTGACTAGAAAAGGTAGGCCCCAAAGCCATTGTATCCTTCAACC  
AACCATTAGTCTCTACGACAAGTAATATTCACGAGGAATAATCAAGACCTATTTAC  
CCTTTTCCTTCTAACACTAGCCCTTATTGTGCAATGACCCTCGCACAAATGGCTTTTG  
TTATATATTTTATTTTATTTTCTTCGTGCTGGGGTtagTTGCAGTTGCTTCTAATCCG  
TCGCCCTACTATGCTGCTTACGGCTTAGTTGTGGTAGCCGGGATGGGGTGTAGTGTA  
TTAATTGGGCATGGGGCGCCCTTTCTATCTATAATTCTTTTCCTAATTTACTTGGGGG  
GAATGCTAGTTGTATTTGCATTTGCAGTAGCAATAGCTTCTGAGCCGCACCCAGTCG  
GCTGGAATTCTTGGGCTGTATTGGGCTACGCTTGTCTACATGGCAGCAGTAGCGTAG  
TTGCTGGGGCGCTTTGAGGGGGATGATATGAATCGTCTTGAGCTACAGTAGATGGTT  
TTGCGGAGACGGGGGTGTTTCGGGGTGACCTGGGCGGGGTAGCCATGATTTATGGTT  
CTGGGGGAGGGCTGTTAGTTATCAGTGCGGGGGTATTGCTTTTAACGCTGCTTGTAG  
TCCTTGAGTTAGCCGGCCCATGTGCCGAGGGTCATTGCGACAATAA"/>

<sequence id="seq\_Limanda\_limanda\_MN1228861" spec="Sequence"

taxon="Limanda\_limanda\_MN122886" totalcount="4"

value="ATGATACTAAGCTTCTTTGATCAATTTATGTCCCCCGTATTCCCTGGGCATTCC  
CCTAATTGCCCTGGCAATTACACTGCCCTGAACGCTGTTCCCAGCCCCCTGTCTTCGCT  
GACTAAATAATCGTATAGTTTCACTTCAAGGATGATTCATTAGCGGCTTCACATCTC  
AACTTCTTCTCCCACTAAACCCAGCCGGACACAAGTGAGCCATTTTATTTGCCTCATT  
AATCTTTTCTATTTCTATTAATATGCTCGGACTTCTTCCGTACACATTTACACCTACA  
ACTCAACTCTCCCTTAACCTCGGCCTCGCAGTTCCACTCTGACTGGCAACTGTCATTA  
TGGTATGCGAAACCAACCAACAGTCGCCCTAGGCCACCTTCTTCCAGAAGGGACCC  
CCACACTTCTTATCCAGTACTAATTATTATCGAAACAATTAGCCTGTTTATTCGACC  
TCTCGCTCTTGGTGTTTCGACTTACAGCAAATCTTACAGCTGGCCACCTGCTCATTCAA  
CTCATTGCAACAGCTGCCTTTGTTCTTCTTCCGCTTATGCCTGTCGTTGCTATTTTAAC  
AGCAACAGTTCTCTTCCTCCTAACCCCTCCTAGAAGTTGCCGTTGCTATAATTCAAGCC  
TACGTCTTTGTTTTACTCTTAAGTCTTTACCTACAAGAAAACGTCTAATGCCTCAACT  
GGACCCCGCACCCCTGATTTGCAATTTTGGTTTTTCTTCTTGAATAATCCTTTTAACTGTT  
ATTCCCCCAAAGTTTTAGCTCACACCTACCCCAATGAGCCAACCTCCCAAAGCACA  
CAAAAACAAAACAGAACCCTGAAACTGACCATGATACTAAGTGGCAATCACACGTT  
GATTTTTCTCGACCAATCACAAAGACATCGGCACCCCTCTATCTCGTATTTGGTGCCTG  
AGCCGGAATAGTGGGGACAGGTCTAAGTCTGCTCATTGCGGCAGAACTTAGCCAAC  
CTGGGGCTCTCCTGGGAGACGATCAAATTTATAACGTAATCGTTACCGCACACGCCT  
TTGTAATAATCTTCTTTATAGTAATACCAATTATGATCGGAGGGTTCGGAAACTGAC  
TTATCCCATAATGATCGGGGCCCTGATATGGCATTCCCTCGGATGAACAACATGA  
GTTTCTGACTTCTACCTCCATCGTTTCTTCTTCTCCTAGCCTCTTCAGGCGTAGAAGC  
CGGGGCTGGAACCTGGGTGAACTGTATACCCTCCGTTAGCTGGAAATCTAGCACACG  
CTGGAGCATCCGTAGACCTAACAATCTTCTCTTTCACCTTGCCGGGATTTTCATCAAT  
CCTGGGAGCAATCAACTTTATTACCACAATCATCAACATGAAACCTACGGCAGTAAC  
TATGTACCAAATCCACTATTCGTGTGAGCCGTGCTAATTACAGCCGTTCTTCTCCTC



CTCTCCCTTCCGGTCTTAGCCGCTGGCATCACAATGCTACTGACAGACCGCAACCTA  
AACACAACCTTTCTTTGACCCTGCCGGAGGGGGTGACCCCATCCTCTATCAACACCTA  
TTCTGATTCTTTGGCCACCCAGAGGTATATATTTTAATTCTTCCAGGCTTCGGAATAA  
TTTCTCACATTGTTGCATATTATGCAGGTAAGAAAGAACCGTTTGGCTACATAGGAA  
TAGTCTGAGCTATGATGGCTATTGGACTCCTGGGCTTCATCGTATGGGCTCATCACA  
TGTTTACAGTTGGAATAGACGTGGACACACGAGCCTACTTTACTTCTGCCACAATGA  
TTATCGCCATCCCAACTGGCGTAAAAGTCTTTAGCTGACTCGCAACCCTCCACGGAG  
GAAGCATTAAAGTGAGAAACCCCACTTCTGTGAGCCCTAGGCTTTATTTTCCTCTTCA  
CAGTAGGAGGTCTTACTGGTATTGTCTTAGCTAATTCCCTCTCTCGACATCGTCCTTCA  
TGACACATACTATGTAGTAGCCCACTTCCACTATGTACTTTCTATGGGTGCTGTATTT  
GCAATCGTTGCCGCCTTTGTACACTGATTCCCCCTATTTACAGGCTACACCCTCCACT  
CCGCATGAACAAAAATTCACCTTTGGCCTTATGTTTGTGGGAGTTAATCTCACATTCTT  
CCCCAGCATTCTTGGCCTTGCCGGAATACCTCGACGGTACTCGGACTACCCAGA  
TGCATACACCCTATGAAATACTGTCTCATCAATCGGATCACTAATGTCCCTCGTTGCT  
GTGATTTTATTTTTGTTTATTATTTGAGAAGCATTACAGCCAAGCGAGAAGTCGGG  
GCAGTAGAACTAACTTCAACTAATATCGAATGACTTTACGGCTGCCCCCACCCTAT  
CACACATTTGAGGAGCCCGCATTCGTCCAAGTTCGTATAAACTAAATGGCACATCCG  
TCACAACCTGGGGTTTCAGGACGCAGCTTCCCCCCTAATAGAAGAACTACTTCACTTC  
CATGATCACGCCTTAATAATTGTTATTCTCATCAGCGCAATAGTGCTTTATATTATTG  
TGGCAATGGTCACGGCCAACTAACCGACAAGCTTGTCTTAGACTCCCAAGAAATT  
GAAGTAATCTGGACAGTTCTCCAGCTATTATCCTAATTCTCATCGCCCTCCCGTCTC  
TCCGCATTTTATACCTGATAGACGAAATTAACGACCCCCATTTAACCATCAAAGCAT  
TAGGTCACCAGTGATACTGAAGCTACGAATACACAGACTACCAAGACCTTGGTTTTG  
ACTCTTATATAATCCCAACACAAGACCTGACCCCCGGGCAGTTCCGACTACTTGAAG  
CAGATCACCGAATGGTGATTCTGTAGAAATCCCCAATTCGAGTCCTTATTTACAGCTG  
AAGATGTTTTACATTCCTGAGCAGTCCCCTCCCTGGGCGTAAAAGTTGATGCTGTGC  
CTGGCCGATTAAACCAAGCAACCTTTATTGTTAGCCGACCCGGCGTATTCTACGGCC  
AATGCTCTGAGATTTGCGGGGCAAACCACAGTTTTTATACCCGTCGTTGTAGAAGCAG  
TCCCCTTGACCACTTTGAGAACTGGTCTTCGCTAATAATTGAAGACGCCTATGGCC  
CCTCAAGCGCACCCGTACCACATAGTCGACCCTAGCCCATGACCCCTCACGGGGGCT  
ATCGCTGCCCTATTGATAACATCTGGCCTTGCTATCTGATTCCACTTCCACTCTACCA  
CCCTAATAACTATTGGGACAGTCCTTCTTATTCTAACAGTCTTCCAATGATGACGAG  
ATGTCGTTTCGAGAAGGTACATTCCAAGGGCACCACACCCCTCCCGTTCAAAAAGGC  
CTCCGATATGGGATGATCTTATTTATTACCTCAGAGGTCTTATTTTCTTAGGCTTCT  
TCTGGGCTTTTTATCACTCAAGCCTCGCACCTACCCCTGACCTAGGAGGTTTCTGACC  
ACCCGCAGGCATCACACCTTTAGACCCATTTGAAGTCCCACTTCTTAATACAGCAGT  
CCTACTTGCTCTGGCGTAACTGTCACATGGGCACATCACAGTATTATAGAAGGCGA  
ACGAAAACAAGCTATCCAATCTCTTGCTCTCACAATTTTACTCGGTGGCTATTTTACC  
TTCCTCCAAGGCCTTGAATATCACGAAGCCCCCTTCACCATTGCAGATGGAGTTTAT  
GGTGCCACATTCTTTGTTGCTACCGGCTTCACGGACTTCACGTCTTAGTGGGCTCCT  
CTTTCTTAGCCGTTTGTTTATTACGCCAAATTCTACACCATTTTACATCCGACCACCA  
TTTTGGCTTCGAGGCAGCCGCGTGATACTGACACTTTGTAGACGTCGCTGACTCTTC  
CTCTATATCTCTATTTACTGATGAGGATCTTAATGGCCAATCTCCGTAAATCCCACCC  
CCTTCTTAAATCGCAAACGATGCTTTAGTAGACCTCCAGCCCCCGCAAACATCTC  
TGTCTGATGAACTTCGGGTCTCTTTTAGGACTCTGCTTAGTAACCCAGATCGCTACC  
GGCTTATTCTTAGCCATACACTACACATCAGATATTGCTACTGCCTTTACCTCGGTGCG  
CACACATCTGCCGGGACGTCAACTACGGCTGACTTATCCGAAGCATTTCATGCCAATG  
GAGCATCATTCTTTTTCATTTGCATCTACCTCCATATTGGCCGTGGTCTCTACTATGG

TTCTTACCTTTATAAGGAAACATGAACTATTGGTGTGTGCTCCTACTTCTTGTAATG  
ATGACGGCTTTCGTTGGTTACGTACTTCCTTGAGGACAAATGTCCTTTTGAGGTGCA  
ACCGTCATTACCAACCTCCTTTCCGCAGTCCCCTACGTTGGGGGCTCCCTCGTCCAAT  
GAATCTGAGGTGGCTTTTCTGTAGATAATGCAACCCTTACCCGATTCTTTGCATTCCA  
CTTCCTTTTCCCGTTCATTATCGCAGCCGCCACAGTAATTCATCTTCTCTTCCTTCACG  
AAACTGGTTCGAACAACCCACCGGTTTAAACTCAAACCTCCGATAAAGTCCCATTTC  
ACCCTTACTTCACGTACAAAGACCTTTTGGCTTTGCAGTCCTTCTTACTGCTCTGGCC  
TCCCTCGCCCTCTTCTCCCCAACCTTTTAGGAGACCCGGACAACTTTACCCCTGCAA  
ACCCACTTGTTACACCCCCACATATCAAGCCCGAATGATATTTCTGTGTTGCCTACGC  
CATTCTCCGTTCCATTCCAAACAAACTTGGAGGAGTTCTTGCCCTCTTATTCTCCATC  
CTAGTTCTCATACTTGTCCCCTTTCTCCACACCTCCAAACAACGAAGCCTTATGTTCC  
GCCCTGTAACACAGTTTCTGTTCTGGTCTTTAGTAGCTGACGTAATAATTCTGACTTG  
AATTGGAGGAATACCCGTTGAGCACCTTTTCGTTATCATTGGCCAAGTAGCATCTCT  
TATCTACTTCTCGCTTTTCCCTAGTCCTTATCCCGACAGCAGGATGAATAGAAAACAA  
AGTCCTCGGATGAAACTATGATTTCAACCCTCATTACGCATATTATTAACCCACTAG  
CCTTTATTGTCCCCGTCTTGTTAGCCGTAGCATTCTGACTCTCCTTGAACGAAAGGT  
GCTAGGTTATATACAACTCCGAAAAGGTCTAACATCGTTGGACCTTACGGCCTCCT  
TCAACCTATTGCTGACGGCGTAAACTCTTCATTAAAGAACCCGTTTCGCCCTTCGAC  
CTCCTCACCAGTTTTATTCTTTTATCACCCATACTAGCGCTAACGCTAGCCCTTGCA  
CTTTGAGCCCCCATACCTTTTCCATACCCTGTTGTGGACCTCAACCTGGGGATTTTAT  
TTATTCTAGCCTTGTCTAGCCTCGCAGTGTACTCCATCCTCGGGTCAGGCTGGGCATC  
TAATTGGAAGTATGCATTAATAGGGGCGCTACGTGCTGTTGCACAAACAATTTCTTA  
CGAGGTCAGCCTCGGACTCATCTTACTTAGCATCATTATCTTTGCAGGAGGGTTTAC  
ACTCCAAACCTTTAACACAGCCCAAGAGGCCATTTGACTCGTAGTGCCCGCCTGACC  
ACTGGCTGCCATATGATACATCTCCACCCTTGCCGAAACAAACCGTGACCCCTTCGA  
CCTGACGGAGGGGGAGTCTGAACTTGTCTCAGGCTTCAACGTAGAGTACGCAGGTG  
GACCCTTCGCTTTATTCTTTTTAGCCGAATATTCAAACATCCTCTTAATAAATACACT  
GTCCGCAACACTATTTTTGGGCGCCTCACACATTCCAAACATCCCAGAATTAACAAG  
CATCAACTTGATAACTAAGGCCGCCCTTCTCTCAGTTGTCTTTCTCTGAGTCCGAGCT  
TCGTACCCGCGGTTCCGTTATGACCAGCTTATACACCTCATTGAAAAAATTTCTTC  
CACTAACGCTGGCGCTGGTTATTTGACACTTAGCGCTCCCTATTGCATTCGCTGGCCT  
CCCACCTCAGCTGTAGATGAACCCCTACATCTTGACCACCCTTCTATTTGGTTTGGGC  
CTAGGTACAACACTGACATTTGCAAGCTCCCCTGACTTCTCGCGTGAATAGGCCTT  
GAAATTAATACTAGCCATTATTCCACTAATAGCCCAACACCACCCTCGGGCG  
GTTGAAGCCACTACTAAGTACTTCCTGGCACAAGCCACAGCAGCGGCCACCCTTCTG  
TTTGCAAGCACCACCAACGCCTGAATTACCGGACAATGGGATGTTCAACAAATAAC  
ACATCCGCTCCCCACAACAATAGTTGTGATCGCCCTAGCACTAAAAATTGGACTGGC  
TCGGATACACTCCTGGCTCCCCGAAGTTCTTCAGGGCCTAAACCTCACTACGGGTCT  
CATTTTGTGACCTGACAGAAGCTTGCACCTTTTGCTCTTCTACTACAAATTCAAACG  
ACAATCCTACGCCTCTAATCATTATTGGCCTTCTCTCTGCCCTTGTTGGCGGCTGAGG  
CGGTCTCAACCAAACCCAACTGCGCAAAGTTCTTGCCTACTCCTCAATCGCCACCT  
TGGTTGAATAATACTTATCCTTCAATTTTCACCACTCCTCAGCCTCCTTGCACTTCTG  
ACATATTTTCTATAACCTTTTCAGCTTTTCTCATCTTCAAAGTAAACAAGGCCACTAC  
TGTTAATGCACTCGCCATCTCTTGGGCAAAAACCTCCTGCCCTTACAGCCCTAGCACC  
CCTTGTTTTACTCTCCCTTGGGGGCCTTCCCCCACTTACGGGCTTTATACCAAAGTGG  
TTTATTCTTCAGGAACCTTACCAAACAAGATTTACCACACTAGCTACTCTCGCTGCACT  
AACTGCCCTCTTGAGCCTCTACTTCTACCTACGTCTCTCGTATGCTATGACCCTAACC  
ATATTTCCCAATAACCTCATTGGCATGACCCCTGACGATTCTCAACTCCCCAGTTTA

CTCTTCCCCTCGCCGTTTCCACTGCGGCAACCACCCTCCTCCTGCCATTGGCACCTGC  
TGCCGTAGCACTCCTCGTCACCTATGAGCCTTCTTCTAACCATCATTTC AATTACCGC  
CCTCCTATCAACGGTACTTGCCATTGTGTCTTTTTGACTTCCCCAAATTACGCCGGAC  
TATGAAAACTGTCAACCATACGAGTGTGGCTTTGACCCCATTTGGTTCCGCCCCGACTA  
CCCTTCTCGATGCGATTTTTTCTCATCGCCATCCTTTTTCTTCTGTTCGACTTAGAAAT  
TGCACTTCTCCTCCCCCTCCCGTGAGGCGACCAACTAGCATCCCCTCTACTTACATTT  
ACCTGAGCTGCAGCAGTTCTATCGCTCCTAACCCTCGGCCTCATCTACGAATGAGTA  
CAAGGAGGCCTAGAATGGGCTGAATATGCTAAAAATTCTAATTCCAACACTTATGCT  
AATCCCAACAGCCTGACTACTTAAACCTAGCTGGCTCTGGCCCCATAAGCTTATTGTA  
TAGCTTTTGCATCTCCTTAATCAGCCTCTCGTGACTAAAAAACCTCTCGGAAACCGG  
CTGATCCTCACTCAACCTATTTATAGCCACCGACTCTTTATCAACCCCCCTCCTCGTC  
CTGACATGTTGGCTACTTCCGCTAATAATCTTAGCAAGCCAGAAACATACTGCCTCA  
GAGCCACTCAGTCGGCAGCGCATGTATATCTCGCTTCTCGCCTCCTTCAATTTTTCT  
GATTCTAGCATTTAGCGCCACAGA ACTGGTAATGTTTTACGTAATATTTGAAGCTAC  
CCTTATCCCGACGCTGATCATTATCACTCGCTGAGGAAACCAAACAGAGCGCCTAAA  
TGCGGGAACCTACTTCCTGTTCTATACCCTGGCTGGCTCACTTCCTCTTCTTGTGTC  
TTGCTCCTACTCCAAAACACGTCCGGA ACTCTTTCATTGTTAACGCTCCACTACACG  
GACCCGCTCGCTGTCATCCTATGCGGACAAATTATGATGGGCCGGATGTCTTCTAGC  
TTTCCTAGTTAAAAATGCCACTTTATGGCGTTCACCTCTGACTCCCCAAAGCACATGTT  
GAAGCCCCAATTGCAGGCTCAATGATCCTTGCAGCGGTTTTACTTAAGCTAGGAGGC  
TATGGCATAATCCGTATAATAACAATACTAGAGCCTCTAACC AAAGAGTTAAGCTAC  
CCCTTTATTATCTTTGCACTCTGAGGCGTAATCATGACTGGCTCAATTTGCCTACGAC  
AAACGGATCTTAAGTCATTAATTGCCTACTCCTCTGTTAGTCACATGGGTCTCGTAG  
CAGGAGGAATTCTCATCCAATCGCCCTGAGGACTCACGGGTGCACTCACACTTATAA  
TCGCCCACGGTCTTACCTCCTCAGCCCTATTTTGCCTGGCAAATACAACTATGAGC  
GAACACACAGCCGCACAATAGTATTAGCACGAGGACTCCAAGTGGCTTTACCCCTA  
ATAGCCACTTGATGATTTGTTTCCAGCCTAGCTAACCTGGCCCTGCCACCACTACCC  
AACCTTATGGGGGAGCTGATAATTATCACCTCCCTTTTTGACTGGTCCTGATGAACA  
CTAGCACTTACAGGGTCCGGGACTCTTATTACCGCTGGCTACAGCCTCTATATATTCT  
TAATGACTCAACGAGGCCCTCTCCCAACACATGTAATTGCACTTGAACCCTCACACA  
CCCGAGAACATCTTCTTATTGCCTTCACCTCATCCCTCTTGTTCTCCTCGTTCTTAAGC  
CCGAGCTGATCTGAGGCTGAACTGCCTATGACCCCCACACACTTTGCCTTCTCCTCA  
GCCTTTTTTCTAGGTTTAACAGGCCTGGCATTCCACCGGTCCACCTCCTTTCCGCAT  
TATTGTGCCTTGAAGGAATGATACTGTCCCTTTTTGTTGGCCTCTCCCTGTGAACTCT  
ACA ACTAGACTCAACTAACTTTTCAGCATCTCCATTACTCCTGCTTGCATTTTCAGCC  
TGTGAAGCAAGCGCCGGGCTCGCCCTTCTAGTAGCCACTGCCCGAACCACGGAAC  
TGACCGACTGCAAAGCCTAAACCTCCTCCAATGCTAAATGCACCCACCTCCCTAAT  
GATCTCATCAAGCTTGATTACAATCTTTGCATTACTAGCCTACCCACTGGCCACCAC  
ATTCCGTCCTGCGCCTCAGGGACCTCAATGAGCCACATCTCATGTCAAGACAGCTGT  
AAAAATAGCTTTCTTTGTCAGCCTCTTACCCCTTGCCCTGTTCTTAAATGAAGGTGCC  
GAGACAATTGTTACTAACTGGGCCTGAATGAACACTAACACCTTTAACATCAACATT  
AGCCTAAAATTTCGACTTTTACTCGATTATCTTCACTCCTATTGCCCTTTACGTTACTT  
GGTCCATTCTAGAATTCGCATCATGGTACATACACGCTGACCCACACGTAAACCGCT  
TTTTCAAGTACCTTCTAACGTTTCTTATTGCTATAATTATCCTAGTA ACTGCAAACAA  
CATGTTTCAACTCTTTATCGGGTGAGAGGGCGTAGGGATCATATCGTTCCTCCTCATT  
GGGTGGTGGTACGGACGGGCAGATGCTAAATACTGCAGCACTTCAAGCAGTACTATA  
CAACCGGGTCGGAGACATCGGACTTATTTTCGCCATAGCTTGAATAGCAACAAACCT  
GAACTCCTGAGAAATACAACAAATCTTTGCGACCTCTAAGGATATGGA CTTAACCTA

CCCCCTCATTGGACTAATCATCGCAGCAACCGGGAAATCAGCTCAATTCGGGGCTCCA  
CCCTTGGCTGCCCTCAGCCATGGAAGGTCCTACACCGGTATCTGCCCTACTTCATTCT  
AGCACTATAGTCGTGGCCGGCATCTTTCTCCTGGTACGAATAAGCCCACTTCTGGAG  
AATAACCCGGTTGCCCTCACAACCTGCCTCTGTCTCGGGGGCCCTTACGACCCTGTTC  
ACTGCAACCTGCGCCCTCACACAAAATGACATTAAAAAAATCGTCGCATTTTCTACA  
TCTAGTCAGCTCGGGCTCATGATGGTAACCATTTGGTTTAAACCAACCTCAACTAGCA  
TTTCTACACATCTGTACACACGCCTTCTTTAAAGCCATACTATTTCTTTGTTTCGGGGT  
CTATTATTCATAGCCTAAACGATGAGCAGGACATCCGAAAAATAGGGGGTATACAC  
CACCTTGCACCTTTTACATCCTCTTGCTTGACAATTGGAAGCCTCGCACTTACGGGCA  
CCCCATTCTTAGCTGGTTTCTTCTCTAAAGATGCCATCATCGAAGCATTAAACACATC  
CCATTTAAACGCCTGAGCCCTAACCCTAACCCTCCTGGCCACATCTTTTACAGCAAT  
CTACAGCTTCCGGGTAATTTTCTTTGTGCCTATGGGCCACCCCCGATTTAATCCATTT  
CCCCCATTAACGAAAACAACCCCGCAGTAATTAACCCGCTTAAACGCCTAGCATGG  
GGAAGTATCCTTGCAGGACTACTAATTACCTCTAATATTACACCCCTTAAGACCCCC  
GTGATGTCTATGCCTCCCCTCCTAAAACTAGCTGCCCTTGCAGTTACAATTGTCGGCC  
TACTTATTGCCATAGAACTCGCCATATTAATAACAAGCAATTTAAATCGACACCTG  
TCTTAACGTACACAACCTTCTCTAATATGTTGGGCTTTTTCCCCGCCATTGTACACCGC  
CTAACCCCTAAATTAGGGCTCGTTCTTGGCCAAGACATTGCTAACCCAGATAGTAGAT  
CAAACCTGACTAGAGAAAGTAGGCCCCCAAAGCCATTGTATCCTTCAACCAACCATT  
AGTCTCTACAACAAGTAATATTCAACGAGGAATAATCAAGACCTATTTACCCTTTTC  
CTTTTAACACTAGCCCTTATTGTGCAATGACCCTCGCACAAATGGCTTTTGTTATATA  
TTTTGTTTTATTTTTCTTCGTGCTGGGGTTAGTTGCAGTTGCTTCTAACCCGTCGCCCT  
ATTATGCTGCTTACGGCTTAGTTGTGGTAGCCGGGATGGGGTGTAGTGTGTTAATTG  
GGCATGGGGCGCCCTTTTTATCTATAATTCTTTTCCTAATTTACTTGGGGGGAATGCT  
AGTTGTATTTGCATTTGCAGTAGCAATAGCTTCTGAGCCGCACCCAGTCGGCTGGAA  
TTCTTGGGCTGTATTGGGTTACGCTTGTTTACATGGCAGCGGTAGTGTAGTTGCTGG  
GGTGCTTTGAGGGGGATGATATGAATCGTCTTGAGCTACAGTAGATGGTTTTGTGGA  
GACGGGGGTGTTTCGGGGTGACCTGGGTGGGGTGGCCATGATTTATGGTTCCGGGG  
GAGGGCTGTTAGTTATCAGTGCGGGGGTATTGCTTTTAACGCTGCTTGTAGTCCTTG  
AGTTAGCCGGCCCATGTGCCGAGGGTCATTGCGACAATAA"/>

<sequence id="seq\_Paralichthys\_olivaceus\_AB0286641" spec="Sequence"  
taxon="Paralichthys\_olivaceus\_AB028664" totalcount="4"  
value="ATGATACTAAGCTTCTTTGATCAATTTATATCCCCCGTATACCTGGGTATTCC  
CCTTATTGCACTTGCAATTATCTTACCATGAGCATTATTCCCACCCCTCTAGTCGAT  
GAATAAACAACCGACTGCTCACACTCCAAGGCTGATTTATTAACCGTTTTACCTCCC  
AACTCCTTCTTCCACTAAACCTCGGGGGGCCACAAATGAGCGACCCTGTTTGCATCAC  
TCATATCTTCTTTTTCTATTAACATGCTTGGACTTCTCCCCTACACCTTTACACCCACA  
ACCCAGCTCTCATTAAATATGGGCCTCGCAGTCCCCTCTGACTCGCCACTGTCATT  
ATGGTATACGAAACCAACCCACACATGCATTAGGCCATCTATTGCCAGAAGGCACC  
CCTACAGCCCTGATCCCAGTTTTAATTATCATTGAAACAATTAGTCTGTTTCATTTCGCC  
CTCTTGCCCTTGGTGTCCGACTCACAGCAAACCTGACGGCAGGTCACCTCCTAATTC  
AACTTATCGCTACAGCCGCCTTTGTTCTCCTCCCCATCATACTATAATCGCGATTTT  
AACAGCAACCCTCCTCTTCTTCTTACACTCCTAGAGGTTGCAGTCGCAATAATTCA  
GGCCTATGTATTTGTCTTACTCTTAAGCCTCTACCTACAAGAAAACGTCTAATGCCC  
CAGCTTAACCCCGCACCTTGGTTTATAATCCTAGTTTTTTCTTGAATAGTGTTTTTGA  
CAATTATTCCCCCAAAGTCTTAGCCCATACCTTCCCCAATGAACCCACCCACAAA  
GCACACAAAAACAAAACAGAATCCTGAAACTGACCATGATACTAAGTGGCAATCAC  
ACGTTGATTTTTCTCGACCAATCACAAAGACATCGGCACCCTCTATCTCGTATTTGGT

GCCTGAGCCGGAATAGTGGGGACAGCCCTAAGCCTCCTCATTCGGGGCAGAACTCAG  
CCAACCTGGTGCTCTCCTAGGGGACGACCAGATTTATAACGTAATCGTTACCGCACA  
CGCCTTTGTAATAATCTTTTTTCATAGTTATACCAATTATGATTGGAGGCTTTGGCAAC  
TGACTTATCCCCCTGATAATCGGTGCCCCAGACATAGCATTCCCTCGAATAAATAAT  
ATAAGCTTCTGACTTCTACCCCCTTCATTCTTCTCTCCTGGCTTCTTCAGGTGTCTGA  
AGCTGGTGCCGGTACCGGGTGGACTGTCTACCCTCCCCTAGCTAGCAACCTCGCCCA  
TGCTGGAGCCTCAGTAGATCTAACCATCTTTTCACTACACCTTGCAGGTATTTTCATCA  
ATTCTGGGAGCTATCAACTTCATTACTACCATTATTAACATGAAACCCACAACCTGTC  
ACAATATACCAAATTTCCCCTGTTTGTCTGAGCCGTCCTAATTACGGCTGTCTGTCTGC  
TCCTCTCGCTGCCAGTTTTAGCCGCCGGTATTACAATACTGCTTACAGACCGAAACC  
TTAATACAACATTCTTTGACCCTGCAGGAGGAGGGGATCCAATCCTCTACCAACACC  
TGTTTTGATTCTTTGGCCACCCTGAAGTATATATTTTGATCCTCCCAGGCTTCGGTAT  
GATTTTCGCACATTGTTGCATACTACTCAGGGAAGAAAGAACCCTTCGGCTACATGGG  
TATGGTCTGAGCTATGATGGCTATCGGCCTTTTAGGTTTTATTGTGTGAGCCCACCAT  
ATGTTTACAGTCGGTATGGACGTAGACACACGAGCTTACTTTACATCAGCAACAATA  
ATTATTGCGATCCCAACAGGTGTAAAAGTTTTTAGCTGATTAGCCACCCTTCACGGA  
GGGAACATTAAATGAGAAACACCACTACTATGAGCCCTCGGGTTCATCTTCCTTTTC  
ACAGTAGGGGGCCTGACCGGGATCGTACTAGCCAACTCCTCCCTAGACATCGTTCTT  
CATGACACATACTATGTAGTAGCCCACTTCCACTACGTCTTTTCGATGGGGGGCCGTC  
TTTGCCATCGTTGCTGCTTTCGTCCACTGATTCCCGCTATTTACAGGCTACACACTTC  
ACTCAACATGAACAAAAGTTCACTTCGGCGTAATATTTATTGGAGTAAACTTAACAT  
TCTTCCCCCAACATTTCCCTAGGTCTAGCCGGAATGCCCCGACGCTACTCTGACTACC  
CCGATGCCTATGCTCTCTGAAATACGGTCTCCTCAATTGGATCTCTAATGTCTCTCGT  
CGCTGTAATTATGTTCCCTATTCATTATTTGAGAAGCATTCTCAGCTAAACGAGAAGT  
CCTATCAGTCCTTATAACCGCAACAAACGTTGAGTGACTCCACGGCTGCCCTCCCC  
CTACCACACATTCGAGGAACCTGCATTTCGTTTCGAGCCCCATTAAACTAGATGGCCCA  
TCCCTCACAACCTCGGATTTCAAGACGCAGCTTCACCCCTAATAGAAGAACTACTTCA  
CTTCCACGATCACGCCTTAATAATTGTAATCCTCATCAGTACAATGGTACTTTATATT  
ATTGTTGCCATAGTCACAGCGAACTTACGGACAAACTTGTTCTAGACTCCCAAGAA  
ATTGAAATCATCTGAACAGTTCTCCCAGCTATCATTCTTATTCTTATTGCCCTCCCAT  
CCCTTCGAATCTTGTACCTAATGGATGAAATCAACGACCCCCACCTCACAATCAAAG  
CCATAGGCCATCAGTGGTACTGAAGCTATGAATACACAGATTATGAGGACCTCGGC  
TTCGACTCATATATAACCCCTACACAAGACCTTACACCCGGGCAATTTTCGGCTCCTT  
GAAGCCGATCATCGGATAGTGACCCCCGTTGAGTCCCCCATCCGAGTGCTTATTTCC  
GCTGAAGACGTATTACACTCTTGAGCAATCCCCGCTTTAGGTGTAAAAGTAGATGCT  
GTACCCGGCCGACTAAATCAAACAACTTTTATTATTAGCCGCCAGGTGTGTTCTTC  
GGACAATGCTCTGAAATCTGCGGGGCTAATCACAGCTTCATACCAATCGTTGTAGAA  
GCAGTCCCCCTTCAGCACTTCGAAAACCTGGTCTTCGTTAATAATTGAAGAAGCCTAT  
GGCCCATCAAGCACACCCTTACCATATAGTTGACCCCAGCCCATGACCCCTCACGGG  
AGCTATCGCTGCACTTCTAATAACCTCCGGCCTTGCTATTTGATTCCACTTCCACTCT  
ACAACCCTAATAACACTTGGCACAATTCTTCTTATTTTAACCATCTTTCAGTGATGAC  
GCGATGTCGTTTCGAGAAGCCACATTCCAAGGCCATCACACCCACCCGTACAAAAG  
GGTTTACGATACGGGATAATCCTGTTCATTACCTCGGAAGTCCTCTTCTTTTTAGGGT  
TCTTCTGGGCATTCTATCATGCAAGCCTAGCCCCTACCCCTGAGTTGGGTGGTTTCTG  
ACCACCAGCAGGCATCACTCCTCTTGACCCATTTGAAGTCCCTTTACTTAATACAGC  
TGTTCTTCTTGCTTCCGGTGTAACAGTAACCTGAGCACATCACAGCATCATGGAGGG  
TAAACGGAAACAAGCCATTCACTCCCTTTTCTCACAATCCTTCTTGGGGGGCTACTTT  
ACGTTCTCCAAGCACTTGAATACCACGAAGCCCCCTTCACTATTGCAGATGGGGTT

TATGGCGCCACATTCTTCGTTGCCACTGGTTTCCACGGACTTCATGTTCTAATCGGCT  
CGACGTTCTTGGCCGTCTGCCTCCTACGTCAGATTCTCCACCACTTTACGGCCAATCA  
CCATTTTGGGTTTGAAGCAGCCGCATGATACTGACACTTCGTAGACGTTGTATGACT  
GTTCTTTTATATCTCTATCTACTGATGAGGATCTTAATGGCCAGCCTACGAAAATCA  
CACCCCTTTTAAAAATCGCAAATGATGCATTAGTCGATTTACCAGCCCCCTCTAAT  
ATCTCTGTCTGATGAACTTTGGGTCCCTCTTAGGACTATGTTTAATCACCCAGATTT  
TAACCGGCCTATTCTTAGCCATACACTACACCTCAGACATCGCAACTGCCTTCACTT  
CCGTGGCCCACATCTGCCGGGACGTAAACTACGGTTGATTAATCCGAAACATCCACG  
CTAACGGCGCATCATTCTTCTTTATCTGCATTTACCTCCACATCGGCCGAGGTCTATA  
CTACGGCTCTTTTCTGTATAAAGAAACATGAAATGTTGGCGTCATCCTGCTGCTTCTC  
GTAATGATGACCGCCTTTGTTGGTTACGTCCTTCCCTGAGGACAAATATCATTCTGG  
GGTGCCACTGTCATCACCAACCTACTCTCAGCCGTACCTTATGTCGGTAACACCCTA  
GTACAATGGATCTGAGGCGGATTTTCTGTAGATAATGCCACACTCACCCGGTTCTTT  
GCATTCCACTTCCTATTCCCATTTGTCATCGCAGCCGCAACCGTAATCCACCTTATTT  
TCCTACACGAACTGGCTCCAACAACCCCACTGGATTGAATTCAGACTCAGACAAA  
GTCCCCCTCCACCCATACTTCTCATATAAAGACCTCCTGGATTTGCAGCCCTCCTCAT  
TGCCCTAGCTGCCCTCGCTTTATTCTCCCCAAACCTTCTGGGCGACCCAGATAATTT  
ACCCCGCAAACCCACTTGTTACACCGCCCCATATCAAGCCCGAGTGATATTTCTC  
TTTGCATACGCCATTCTCCGATCTATTCCAAATAAACTTGGCGGAGTACTCGCCCTGT  
TGTTCTCTATTTTAATCCTCATGCTTGTCCCCATCCTCCACACATCAAAACAACGAAG  
TCTAATATTCCGACCCTTTTCGCAATTCCTATTTTGATCCCTCGTAGCAGACGTAATA  
ATTCTCACATGAATCGGGGGAATGCCCGTAGAACACCCCTTTTGTTATTATTGGACAA  
GTTGCTTCATTCTCTACTTCTTCCTTTTCTTAGTCATAATTCCAGTAACAGGCTGACT  
AGAAAATAAGATTCTCGGATGACAGTATGATTTCAACACTCATCACCCATATTATCA  
ACCCATTGGCCCTAATCGTACCCGTTCTACTAGCAGTTGCATTCCTCACCTTACTTGA  
ACGGAAAGTGCTCGGTTACATGCAACTCCGAAAAGGCCCAATATCGTCGGACCTT  
ATGGCCTTCTCCAACCTATCGCTGATGGTATTAAACTTTTTATCAAAGAACCTGTTG  
ACCTTCCACCGCATCCCCAGTCCTTTTTCTTTTAGCACCTATGCTCGCTCTCACTCTTG  
CTCTTACACTATGAGCCCCTATGCCTCTTCCATACTCCACAGTTGACCTTAACCTGGG  
GATCTTATTTGTCTCGCACTGTCAAGCCTTGCAGTTTACTCTATCCTCGGCTCAGGT  
TGAGCATCAAATTCAAATATGCCCTCGTTGGGGCACTCCGAGCCGTAGCACAGAC  
CATCTCTTATGAAGTCAGCCTAGGACTTATTTTACTTAATATCATCATCCTCACAGGG  
GGTTTCACTCTTCAGACCTTTAACACAGCCCAAGAGGCTGTCTGACTAGTTTTGCCA  
GCATGACCTCTAGCTGCAATATGGTATATTTCCACACTCGCCGAAACAAACCGGGCA  
CCCTTCGATCTCACCGAAGGAGAGTCCGAACTCGTCTCAGGCTTCAACGTCGAGTAT  
GCAGGAGGACCCTTCGCCTTATTCTTCCTAGCCGAATACTCCAACATCCTCTTGATA  
AATACCTTATCCGCTGTCTTATTCCTGGGCGCCTCACACATTCCCCTATCGCGACCC  
TGACGGCTATTAATCTAATAACCAAGGCGGCACTTCTTTCAGTTGTTTTCTTTGGGT  
GCGGGCCTCTTACCCCGGTTTCGATACGACCAGCTAATACACCTGATCTGGAAAAA  
CTTTCTCCCCCTCACCTAGCGCTGATTATTTGACACTTGGCACTTCCCACTGCACTT  
GCTGGACTTCCACCGCAACTGTAAATGAATCCTTTTATCCTAACCACCCTTCTCCTTG  
GTCTAGGTCTCGGAACTACAATTACATTTGCGAGTTCACACTGACTCTTAGCCTGAA  
TGGGCCTAGAAATCAACACACTAGCCATTATCCCCTCATAGCGCAACATCACACC  
CTCGAGCGGTTGAGGCTACTACTAAATACTTTTTAACACAAGCAACAGCCGCCGCCA  
CACTCCTGTTTGCAAGCATAACAAACGCCTGGCTCACAGGCCAGTGGGACATCCAA  
CAAATGACACACCCCTCGCCACAACCATAATTATTATGCCCTGGCATTGAAAATT  
GGTCTAGCACCAATACACTCCTGACTCCCCGAAGTTCTTCAAGGTTTGGACCTAACA  
ACCGGCCTCATCCTTTCAACTTGACAAAAGCTTGCCCCCTTTGCACTACTTATACAA

ATCCAACCTGACAACCCCAACCCCTTAATTATTTTAGGCCTCACATCTACCCTCGTGG  
GTGGGTGAGGCGGCCTCAACCAAACGCAGCTCCGTAAAATCCTTGCCTATTCATCAA  
TCGCCACCTCGGCTGAATAATACTTATCCTTCAGTTCTCACCCCTCCTCACCCTTCT  
TGCTCTCATCACCTACCTCTTATAACATCCTCAGTATTCCTAATCTTCAAAATAAACA  
AAGCCACAACCATTAATGCCCTCGCAATCTCCTGAACAAAAACGCCTATCCTAACAG  
CTCTTATCCCACTAGTCTTACTCTCCCTAGGGGGCCTTCCCCCTCTAACCGGGTTCAT  
ACCTAAATGGTTTATCCTCCAAGAACTAACAAAGCAAGACCTGCCACCCTCGCCACT  
CTAGCAGCCCTTACTGCCCTCCTCAGCTTATACTTCTATCTACGACTCTCGTACGCGA  
TAACACTCACAAATAGCCCCAAACAACCTCACCGGCACCCTCCGTGGCGATTCTCCT  
CCCCTCAACTAACCCCTTCGCTCGCAATCTCAAGCACAAACCGCCACCCTACTACTCC  
CGTAGCTCCTGCCACCCTAGCGCTCTTAACAACCTATGAGCCTTCTTATGACAATT  
ATTACAATCACTGCCCTGCTTTCTACAATTCTTGCCATTGTATCCTTCTGACTGCCGC  
AGATTCACCAGACCACGAAAAGCTTTCACCATATGAATGCGGCTTCGACCCCATGG  
GCTCTGCTCGACTTCCCTTCTCACTACGATTTTTCTCATCGCCATCCTCTTCCTCCTC  
TTCGATCTAGAAATTGCACTCCTTCTTCCACTTCCTTGAGGAGATCAGCTACCTACGC  
CCTTGCTGACATTCACCTGAGCCACAGCAGTCCTTTTTCTTCTCACCTTGGGTCTTAT  
CTATGAATGAATTCAAGGAGGCCTAGAGTGGGCTGAATATGCTAAAAATCTTAATTC  
CAACACTTATACTTATCCCAACAGCCTGGCTGGTCAAACCAAACCTGACTCTGACCAA  
CTACCTTAACCTCATAGTTTCTGCATCTCCCTAGCTAGTCTCTCATGACTTAAGAACCT  
TTCAGAACTGGCTGATCTTCACTAAACCTCTGTATAGCAACAGATGCCCTATCAAC  
ACCCCTTCTTGTCTCACATGCTGATTACTCCCCCTGATAATTTTGGCAAGTCAAAAC  
CACACGGCCTCAGAACCCATCAACCGCCAGCGCATGTATATTACCCTCCTTACCTCC  
TTCAATTCTTCTTAATCCTCGCATTTCGGCGCAACCGAAATTATCATGTTTTACGTGAT  
GTTCTGAAGCCACTCTTATCCCCACGCTCATTATTATCACACGCTGAGGTAACCAAAC  
AGAACGTCTTAACGCAGGTACCTACTTCCTATTCTACACCCTGGCAGGGTCACTCCC  
CCTGCTCGTCGCCCTACTATTGCTTCAAAATTCCGCCGGGACCCTCTCACTCCTCACC  
CTCCATTACACCGACCCACTCAATAACATCCTATGGAGACAAACTTTGATGAGCGGG  
CTGCCTCCTGGCCTTCCTAGTTAAAATACCTCTCTATGGTGTCCATTTATGACTTCCC  
AAGGCACACGTCGAAGCCCCCATTGCAGGCTCAATAATTCTTGCAGCTGTCTTCTT  
AAGCTTGGCGGTTACGGCATAATCCGAATGATAACAATGCTAGAGCCACTAACTAA  
GGAACATAAGCTACCCCTTCATCATCTTCGCACTCTGAGGTGTAGTAATAACTGGCTC  
GATTTGTCTACGACAAACTGACCTTAAATCCCTAATTGCCTACTCATCCGTCAGCCA  
CATAGGCCTGGTAGCTGGGGGGGTCTAATCCAATCACCTGAGGCCTCACAGGGTC  
CCTAATCCTGATAATCGCCACGGTCTAACCTCCTCAGCTCTCTTTTGGTTTGGCTAAC  
ACAAACTACGAGCGAACACACAGCCGGACCATGGTACTGGCACGAGGACTTCAAAT  
GGCCCTCCCCCTTATGGCAACCTGGTGATTTATTGCCAGCTTAGCCAACCTAGCACT  
TCCACCTCTTCCTAACCTTATGGGTGAACTTATAATTATTATCTCCCTATTTAACTGA  
TCCTGATGAACCCTGGCACTCACAGGAACCGGCACCCTGATCACAGCTGGCTATTCA  
CTCTATATATTCTTATAACCCAACGAGGCCCGCTCCCAACACACATTCTTGCACCTC  
GAACCATCTCACACCCGAGAACACCTGCTCATTGCCTTCACCTACTCCCTCTCATTCT  
CCTAGTGCTTAAACCCGAGCTAATTTGAGGCTGAACAGCCTATGACCCCCACACATT  
TTGCATTTTCTCTGCTTTCTTCTTGGCCTGACAGGCCTTGCAATTCACCGATTTAC  
CTCCTCTCCGCCCTACTATGCTTGGAGGGTATAATACTGTCCCTGTTTCATTGCCCTCT  
CCCTTTGGACACTTCAACTAGACTCAACCAACTTCTCAGCTTCCCCAATACTTCTCCT  
AGCATTTTCGGCCTGTGAAGCAAGTGCAGGTCTGGCCCTCCTAGTAGCTACCGCTCG  
AACACATGGTACCGACCGACTTCAAAGCCTGAACTTACTACAATGCTAAATGTCTCC  
AAACATGTTGATTATGTCTCCAGTCTCGCCATCGTGTTTACACTCCTCACTTTCCCG  
CTAGCCACATCTCTCCTTCCTTCTCCTCGAAAACCTCCAATGGGCCAACTCACACGTG

ACAATAGCTGTAAAAATAGCTTTCTTTGTAAGCCTCCTCCCGTTAGCTCTCTACCTCC  
ACGAAGGCTCAGAAACAATCATTACTATCTGAACCTGAATAAATACTAACTCATTTA  
GCATTAATATCGGCCTAAAACCTTGACTTCTACTCAATCATCTTCGTCCCCATTGCCCT  
TTACGTAACCTGGTCAATTCTAGAATTTGCCTCTTGATACATGCACGCAGACCCACA  
AATAAACCGTTTTTTTTAAATACTTACTAACATTTCTCATCGCGATAATTATTCTAGTC  
ACCGCAAACAACATGTTTCAACTATTCATCGGCTGAGAAGGTGTCGGTATTATATCC  
TTCCTTCTTATCGGCTGATGGTATGGCCGAGCAGATGCTAACGCCGCGGCACTGCAA  
GCCGTAATCTACAACCGGGTTGGAGATATCGGCCTTATCTTCGCCATAGCATGAATA  
GCACTCAACCTAAACTCCTGGGACTTAGAACAACATTTTGCAGCCTCTAAGAACATA  
GACCTATCTTTCCCACTTCTAGGCCTTATCGTCGCAGCAACTGGTAAATCAGCCCAG  
TTTGGACTTCACCCCTGACTACCCGCCGCAATAGAAGGCCCGACACCGGTATCCGCC  
CTACTTCACTCAAGCACGATAGTTGTCGCAGGAATTTTCCTACTAGTCCGAATGAGC  
CCGCTCCTGGAAAACAACCCCATAGCCCTTACAACCTGTCTATGCCTCGGAGCCCTC  
ACAACATTATTTACCGCAACTTGTGCTCTTACCCAGAACGATATCAAGAAGATTATT  
GCATTCTCCACATCTAGCCAATTAGGACTAATAATAGTTACTATTGGACTAAACCAA  
CCACAACCTTGCATTCCTCCACATCTGCACACACGCCTTCTTCAAAGCCATGCTATTCT  
TATGCTCTGGGTCTATTATTCACAGCCTAAACGACGAACAAGACATCCGGAAAATA  
GGGGGAATACATCACCTCACCCCTTCACATCTTCTTGCTTAACTATTGGCAGCCTC  
GCCCTCACGGGAACCCCTTTCCTAGCCGGCTTCTTCTCCAAAGATGCAATTATTGAA  
GCAATAAACACATCCACCTAAACGCCTGAGCCCTCGCTCTCACCCCTCCTAGCCACG  
TCTTTTACAGCAGCTTACAGCTTTCGACTGGTATTCTACGTCTCGATGGGTCAACCCC  
GATTCAACCCATCACCCCTATTAATGAAAACAACCCAGCACTTATTAACCCAATCAA  
GCGACTCGCCTGAGGAAGCATTATTGCAGGACTCCTCATTTTCTCCAACATCTCCCC  
ATTAAAAACCCCGGTTATAAGCATACCTCCAGCCCTCAAACCTAGCTGCCCTTGCAGT  
CACAATCTCAGGCCTTCTCGTCGCTATAGCAATTGTGCAATTGTAAACAAGCCATC  
TCAACCAGCACCCATCGCAACCCCCACCACTTCTCCCTAATACTAGGCTTTTACCCC  
CACATTCTACACCGCCTAGCCCCAAAACCTCGGCCTACTCCTAGGTCAGTCTATTGCC  
AGCCAAATAGTCGACCAAACCTGACTAGAGAAGACAGGACCCAAAGCAATCTCATC  
ATCCAATATCCCCCTGGCCTCCGCCACAAGCAACATTCAAAAGGGAATGATCAAAA  
CATTCCTCCTTTCTTCGTCTCTCTTGGCCCTAATAATTCTTATTTTTACTATTTAAT  
GACTTTTGTGATATGCCTAGTATTGTTTTGCCTTGTTTTAGGGTTAGTAGCGGTGCT  
TCGAACCCATCACCTTATTTTGCTGCTTTAGGGCTGGTTGTTGTTGCTGGTATGGGGT  
GTGGGGTACTGATCGGTCATGGTGGGCCCTTCTGTGCTTAGTACTATTTTAAATTA  
CTTGGGGGGGATGTTGGTTGTGTTTGCCTATTTCGGCGGCGTTGGCTGCTGAACCTTA  
CCCAGAACTTGGGGGAGTCGGCCAGTAATAGTTTACAGTGCTTTACATGGTGGGG  
GTGGTGTAGTCTCTGTATTGTTCTGAGGGGGGTGATATGAGTCTTCATGGGTGTTAG  
TGGATGAGTTGGGTGAGTTTTCGGTGTTTCGGGGTGATATTGGAGGAGTTGCTTTAA  
TATACTCGTCAGGGGGTTGAATGTTGCTTATTAGTGCGTGGGTACTTTTATTGACACT  
ATTTGTGGTGCTCGAGTTGACCGTGGGATGAGTCGAGGGGCGCTTCGGCAGTTT"/>

<sequence id="seq\_Platicthys\_stellatus\_Ps2011" spec="Sequence"  
taxon="Platicthys\_stellatus\_Ps2011" totalcount="4"  
value="ATGATACTAAGCTTCTTTGACCAATTTATGTCCCCCGTATTCCTGGGTATCCC  
ACTAATTGCACTCGCAATTACCCTGCCCTGAACGCTCTTCCCAACCCCTGTGTCCGCT  
GATTAAACAACCGCCTAATTTCACTTCAAGGGTGATTTATTAGCGGTTTTACCTCAC  
AACTTCTCCTCCCCCTAAACCCTGGAGGACACAAATGAGCGCTTCTATTTGCCTCAC  
TAATCTTTCCTTTCTCTATTAACATGCTTGGGCTTCTTCCATACACCTTCACACCTAC  
AACTCAGCTCTCACTTAACCTCGGCCTCGCAGTCCCACTCTGGCTGGCAACCGTCAT  
TATGGTATGCGAAACCAACCAACAGTTGCTTTAGGTCACCTCCTCCCCGAAGGGACT



CCCACCCTCCTGATTCCCGTACTAATTATCATCGAGACAATTAGCCTATTTATTCGAC  
CTCTCGCTCTTGGTGTTCGACTTACAGCGAACCTCACAGCAGGCCACCTGCTTATCC  
AACTCATTGCAACAGCTGCCTTTGTTCTTCTTCCCCTTATACCCGTTGTTGCTATTTTA  
ACAACAACAGTTCTTTTCCTCCTCACCTGCTAGAAGTAGCCGTTGCTATAAATCAA  
GCCTACGTCTTTGTACTACTCCTAAGTCTCTACCTACAAGAAAACGTTTAATGCCTCA  
ACTGAACCCCGCACCTGATTTGCAATTTTGGTTTTCTCTTGAATAATCCTATTAAT  
ATCATTCCCCCAAAGTCTTAGCTCATACTACCTAACCTAATGAGCCAACCTCCCAAAGC  
ACACAAAAACAAAACAGAACCTGAAACTGACCATGATACTAAGTGGCAATCACAC  
GTTGATTTTTCTCGACCAATCACAAAGACATCGGCACCCTCTATCTCGTATTTGGTGC  
CTGAGCCGGAATAGTGGGGACAGGCCTAAGTCTACTCATTGAGCAGAGCTAAGCC  
AACCTGGGGCTCTCCTGGGGGACGACCAAATTTATAACGTAATCGTCACCGCACAC  
GCCTTTGTAATAATTTTCTTTATAGTAATACCAATTATGATTGGAGGGTTTGGAAACT  
GACTTATCCCATTAATAATTGGGGCCCCCGATATGGCCTTCCCTCGAATAAATAACA  
TGAGCTTCTGACTCCTACCCCATCCTTCTGCTTCTCCTGGCCTCTTCAGGTGTTGA  
AGCCGGGGCGGGAACAGGGTGAAGTGTATATCCCCCACTAGCTGGAAACCTAGCAC  
ACGCCGGGGCATCCGTAGACCTCACAATCTTTTCCCTTCACCTTGCCGGAATTTATC  
AATTCTAGGGGCAATCAACTTTATTACCACCATTATCAACATGAAACCAACAGCAGT  
CACTATGTACCAAATCCCCTGTTTGTGGGGCCGTAATAATTACCGCCGTTCTTCTC  
CTCCTTTCCCTTCCGGTCTTAGCCGCTGGCATTACAATGCTACTAACAGACCGCAAC  
CTGAACACAACCTTCTTTGATCCTGCTGGAGGAGGTGACCCCATCCTCTACCAGCAC  
CTGTTCTGATTCTTTGGCCACCCAGAGGTATACATTTTAATTCTTCCAGGCTTCGGGA  
TAATTTCTCACATTGTTGCATACTATGCAGGTAAGAAAGAACCCTTTGGCTACATGG  
GCATGGTCTGAGCTATGATGGCTATTGGACTCCTGGGCTTCATCGTATGGGCCCATC  
ACATGTTTACAGTCGGAATAGACGTAGACACACGAGCTTACTTTACCTCAGCCACAA  
TAATTATTGCCATCCCAACCGGCGTAAAAGTCTTTAGCTGACTCGCAACCCTCCACG  
GGGGAAGCATTAAATGAGAAACCCCACTTCTATGAGCTCTAGGCTTTATTTTCTAT  
TTACAGTCGGAGGTCTTACTGGTATTGTCTTAGCTAACTCGTCTCTTGATATTGTACT  
TCATGACACATACTATGTAGTAGCCCACTTCCACTATGTCCTATCAATAGGAGCTGT  
ATTTGCAATCGTTGCCGCCTTTGTGCACTGATTCCCCCTATTTACAGGCTACACCCTC  
CACTCTACATGAACAAAAGTCCACTTTGGCCTAATGTTTGTGCGGAGTCAATTTAACA  
TTCTTCCCCCAACACTTCCTCGGTCTAGCAGGAATACCTCGACGGTACTCAGACTAC  
CCCGATGCATACACGCTTTGAAATACTGTCTCATCAATCGGGTTCGCTAATGTGCTC  
GTTGCTGTTATCTTATTTTTATTTATTATTTGAGAAGCATTACTGCCAAACGAGAAG  
TCGGGGCAGTAGAACTAACTTCAACTAATATTGAATGACTTTACGGCTGCCCTCCAC  
CCTACCACACATTTGAAGAGCCCGCATTCGTTCAAGTTCGTATAAACTAAATGGCAC  
ATCCATCACAACTGGGATTTTCAGGACGCAGCTTCCCCCCTAATAGAAGAACTACTTC  
ACTTCCATGATCACGCCTTAATAATTGTTATTCTCATCAGCACAATAGTACTGTATAT  
TATTGTGGCAATGGTCACGGCCCACTAACCGACAAGCTTGTGTTAGACTCTCAAGA  
AATTGAGGTTATCTGAACAGTTCTCCCAGCTATTATTCTTATTCTCATCGCCCTCCCA  
TCACTCCGAATTTTATACTTAATAGACGAAATTAACGACCCCCACCTGACAATTA  
GCCTTGGGGCCACCAATGGTACTGAAGCTACGAATACACAGACTACCAAGACCTCGG  
TTTTGACTCCTACATAATCCCAACTCAAGACCTAACCCCGGACAATTCCGGCTATT  
GGAAGCAGACCATCGAATGGTAATTCCTGTAGAATCTCCGATTTCGAGTTCTAATTT  
AGCTGAAGATGTCTTGCACTCCTGAGCAGTCCCTTCCCTGGGCGTAAAAGTAGACGC  
CGTACCTGGACGGTTAAACCAAGCAACCTTTATTGTTAGCCGACCCGGCGTGTCTA  
CGGCCAATGCTCCGAAATTTGCGGTGCAAACCATAGCTTTATGCCCGTCGTTGTAGA  
GGCAGTCCCCTTGACCACTTTGAGAACTGGTCTTCGCTAATAATTGAAGACGCCTA  
TGGCCCATCAAGCACACCCATACCACATAGTCGACCCTAGCCCATGACCCCTCACGG

GGGCTATTGCTGCCCTATTGATAACATCTGGCCTTGCTATCTGATTCCACTTTCACTC  
CACAACCCTAATAACTATCGGAACAGTTCTTCTTATTTTAACAGTCTTCCAATGATG  
ACGTGATGTTGTTTCGAGAAGGCACATTTCAAGGACACCACACCCCTCCCGTTCAAAA  
AGGCCTCCGATACGGAATAATCTTGTTTCATTACCTCAGAAGTTCTATTCTTCCTAGGT  
TTCTTCTGGGCCTTTTATCACTCGAGCCTGGCACCTACCCCTGACCTAGGCGGCTTCT  
GGCCACCAGCAGGGATCACCCCTTGACCCATTTGAAGTCCCACTTCTAAACACAG  
CAGTCCTACTTGCCTCTGGCGTAACTGTAACATGAGCACATCATAGCATTATAGAGG  
GAAAACGAAAACAAGCAATTCAATCTCTTGCTCTAACAATCTTACTCGGGGGTACT  
TCACCTTCCTCCAGGGCCTTGAATACCACGAAGCCCCCTTCACTATTGCAGACGGGG  
TTTATGGTGCCACATTCTTTGTTGCCACCGGCTTCCACGGACTTCACGTCTTAGTTGG  
CTCCTCCTTCTTAGCCGTCTGTCTCCTACGCCAAATTCTTCACCATTTTACATCAGAC  
CACCCTTCGGGTTTGAAGCAGCCGCATGATACTGACACTTCGTAGACGTCGTCTGA  
CTCTTCCTCTATATCTCTATTTACTGATGAGGATCTTAATGGCCAATCTCCGTAAATC  
CCACCCCTTCTTAAAATCGCAAACGATGCTTTAGTTGATCTCCCAGCCCCCTCAA  
CATCTCTGTCTGGTGAACTTTGGGTCCCTCTTGGGACTCTGTTTAGTAACCCAGATT  
GCCACCGGCTTATTCTTAGCCATACACTACACATCTGATATTGCTACTGCCTTCACCT  
CCGTTGCACACATCTGTTCGAGACGTCAACTACGGTTGACTCATCCGAAGCATTTCATG  
CCAACGGCGCATCATTCTTTTTTCATTTGCATTTACCTTCATATCGGCCGGGGTCTATA  
CTATGGCTCTTACCTTTATAAAGAAACATGAACTATTGGAGTTGTACTGCTACTTCTC  
GTTATAATGACGGCCTTCGTTGGGTACGTCCTCCCTTGAGGACAAATGTCATTCTGG  
GGTGCAACTGTCATTACCAACCTTTTATCTGCCGTCCCTTATGTTGGGGGCACACTTG  
TCCAGTGAATCTGAGGCGGCTTTTCTGTAGACAATGCCACCCTTACCCGGTTCTTTGC  
ATTCCACTTCCTTTTCCCATTTCATCATTGCGGCCGCAACAGTAATCCATCTACTCTTT  
CTCCACGAAACGGGCTCAAACAACCCACCGGACTAACTCAGACTCTGATAAAGT  
CCCCTTCCACCCCTACTTCACATACAAAGACCTCTTGGCTTTGCAGTTCTCCTTACTG  
CACTGGCTTCGCTCGCCCTATTTTCCCCCAATCTCTTAGGAGACCCGGACAACCTCAC  
GCCTGCAAACCCGCTCGTCACACCACCACACATCAAGCCAGAGTGATACTTCCTCTT  
TGCCTACGCTATTCTGCGCTCCATTCCAAACAAGCTTGGTGGAGTACTTGCTCTTTTA  
TTCTCCATCCTCGTTCTCATGCTCGTCCCCTTTCTCCACACCTCAAAACAACGAAGCC  
TCATATTTTCGCCCTGTAACACAATTCCTATTTTGGTCTTTAGTAGCCGACGTAATAAT  
TCTGACCTGAATTGGAGGGATACCCGTAGAACACCCCTTCGTTATCATCGGACAAGT  
AGCATCTCTCATCTACTTCTCCCTTTTCCCTAGTCCTAATCCCAACAGCAGGCTTAATG  
GAAAATAAAGTCCTCGGATGAAAATATGATTTCAACCCTCATTACGCATATTATTAA  
CCCACTAGCCTTTATTGTCCCGGTTTTACTAGCCGTAGCATTCCCTAACCCCTCCTTGAG  
CGAAAAGTACTAGGCTACATACTCCGAAAAGGGCCTAACATCGTTGGGCCTTA  
CGGCCTCCTTCAACCTATCGCTGACGGCCTAAAGCTATTTATTAAAGAGCCCGTTTCG  
CCCTTCCACTGCCTCGCCCGTCTTGTTCTCTGTAGCCCCCATGCTCGCGCTCACACTA  
GCCCTTACACTTTGAGCCCCCATACCTTTCCCGTATCCTGTTGTTGACCTTAACCTGG  
GCATTTTGTTTATCCTAGCACTATCTAGCCTTGCAGTTTATTCCATCCTTGGGTCAGG  
GTGGGCTTCTAATTCAAAGTATGCTCTAGTGGGGGCACTACGGGCTGTTGCCAGAC  
AATTTCTACGAAGTGAGCCTCGGACTCATCTTACTTAACATCATTATCTTTACGGG  
AGGCTTCACACTTCAGACCTTCAACACAGCCCAAGAAGCTATCTGACTGGTGGTACC  
CGCTTGACCACTGGCTGCTATGTGATACATCTCCACCCTTGCCGAGACAAACCGTGC  
ACCTTTTCGACCTGACAGAAGGGGAGTCAGAGCTTGTTTCAGGCTTCAACGTAGAGTA  
CGCCGGAGGACCCTTTGCCCTGTTCTTTTGTAGCTGAATACTCAAACATCCTCCTAATG  
AATGCTCTATCCGCAACACTTTTCTGGGCGCTTCCCACATTCCGTCCATCCCCGAAT  
TAACCAGCATCAATATCATAACCAAAGCAGCTCTTCTCTCAGTCGTCTTCCTCTGAG  
TCCGAGCCTCCTACCCGCGGTTCCGTATGACCAACTTATGCACCTCATTTGAAAAA

ACTTTCTTCCACTGACGCTAGCCCTAGTTATCTGACACTTAGCGCTCCCTATTGCATT  
TGCTGGCCTCCCACCACAGCTGTAGATGAACCCCTACATCTTGACCACCCTTCTATTT  
GGTTTGGGCCTAGGTACAACACTCACATTTGCAAGCTCGCACTGACTTCTGGCTTGA  
ATGGGCCTCGAAATTAATACTGGCCATTATTCCACTGATAGCCCAACATCACCAC  
CCACGGGCGGTAGAAGCCACTACTAAGTACTTTTTAGCACAGGCCACAGCAGCCGC  
CACCCTCCTCTTTGCTAGCACCACCAACGCCTGACTTACCGGACAATGGGACATCCA  
ACAAATAACCCACCCACTTCCCCTACTACAATAGTCGTGATTGCCCTTGCACTAAAAAT  
TGGCCTAGCACCCATGCACTCTTGACTCCCCGAGGTTCTTCAGGGCTTAGACCTCAC  
CACCGGCCTTATCCTATCGACCTGACAAAAGCTTGCAACCCTTTGCTCTATTACTCCAA  
ATTCAAACAACAACCCACACCCCTAATCATTATCGGCTTACTTTCTGCCCTTGTTGG  
GCGGGTGAGGGGGCCTTAACCAGACACAAGTGCCTAAGGTCCTTGCTACTCCTCA  
ATTGCACACCTCGGCTGAATGATACTTATCCTTCAATTTTCACCACTCCTTAGCCTCC  
TTGCTCTTCTCACGTATTTTCTATGACTTTTTTCAGCATTTCATCTTCAAAGTAAACA  
AAGCTACCACTGTTAATGCACTCGCAATCTCCTGAGCAAAAAGTCCCAGCCCTTACAG  
CCCTAGCGCCTCTTGTTTTGCTTTCCCTCGGCGGCCTTCCACCACTCACTGGGTTCAT  
ACCAAAATGATTTATCCTTCAAGAACTAACTAAACAAGACCTCCCACGCTTGCTACC  
GTTGCTGCATTAAGTGCCTTTTGAGCCTTTACTTTTACCTGCGTCTCTCATACGCAA  
TAACCCTGACAATGTTCCCTAACAACCTCGTTGGTGTGGCCCCCTGGCGATTTTACTC  
ACCTCAATTTACCCTCCCCCTCGCCGTCTCAACTGCAGCAACCACCCTTCTTTTACCA  
CTAGCCCCCTGCTGCCGTGGCACTCCTCATCACTTATGAGCCTTCTTCTTACCATCATT  
ACAATTACCGCCCTCCTCTCAACGGTACTTGCCATTGTATCCTTCTGACTCCCCCAA  
TTACACCAGATCATGAGAACTCTCACCTTACGAGTGTGGCTTTGACCCCATAGGTT  
CCGCCCCGACTACCTTTCTCGCTACGATTTTTTCTCATCGCAATCCTCTTTCTTTCT  
GACTTAGAAATTGCTCTTCTCCTCCCCCTCCCGTGGGGAGACCAGCTAGCATCCCCCT  
CTGCTTACATTTACCTGAGCTACGGCCGTCTATCCCTGCTAACCCTTGGCCTCATTT  
ACGAGTGAATGCAAGGAGGCCTAGAATGAGCTGAATATGCTAAAGATTCTCATCCC  
AACATTCATGCTAATTCCAACAGCTTGACTGCTTAAACCCAACTGGCTGTGGCCCAT  
AACTTTATTGTATAGCTTCTGCATTTCCCTTATTAGCCTCTCATGACTAAAAAACCTC  
TCAGAAACCGGCTGATCCTCACTCAACCTATTCATAGCCACCGACTCCCTGTCAACC  
CCACTTCTTGTCTCACATGCTGGCTTCTTCCGTTAATAATTTTGGCGAGCCAGAAGC  
ACACAGCTTCTGAGCCCCCTCGGCCGGCAACGCATGTACATCACTTCTCGCCTCCT  
CCAATTTTTTCTAATCTTAGCATTTAGCGCCACCGAGCTAATCATGTTTTACGTAATA  
TTTGAGGCTACTCTCATCCCTACGCTTATCATCATCACCCGCTGGGGTAACCAAACC  
GAACGCCTAAATGCAGGGACCTATTTCCCTCTTCTACACACTGGCGGGCTCCCTTCT  
CTTCTTGTGCTCCTTACTCTTACTCCAAAACACATCCGGGACTCTCTCATTACTGACAC  
TACACTACGGAGACCCGCTAGCTGTATCCTACGCAGACAACTATGGTGAGCAGG  
CTGTCTTTTAGCCTTCTGGTTAAGATGCCACTCTATGGTGTTCACCTATGGCTACCT  
AAAGCACACGTTGAAGCCCCAATTGCAGGCTCAATAATCCTTGACAGCTGTCTACTT  
AAACTAGGGGGCTACGGCATAATTGCGATAATAACAATGCTGGAACCTTTAACTAA  
GGAGTTGAGCTACCCATTCAATTGTCTTTCGCACTCTGGGGTGTAATCATGACCGGCTC  
AATTTGTCTACGCCAAACAGACCTTAAATCCCTAATTGCCTACTCATCCGTCAGCCA  
CATGGGCTTAGTTGCCGGGGGGATTCTCATTCAATCACCTGAGGTCTCACAGGAGC  
ACTTACACTTATGATTGCACATGGTCTTACCTCCTCAGCCCTCTTCTGCCTCGCAAAC  
ACAACTATGAACGAACTCACAGCCGCACAATGGTCTTGGCACGAGGACTTCAGGT  
GGCTTTACCCCTAACGGCCACTTGATGGTTTATCTCTAGCCTAGCTAACCTCGCCTTA  
CCTCCGTTGCCCAACCTCATGGGGGAACTCATAATTATTACTTCTCTTTTAACTGGT  
CCTGATGAACCTGGCATTAAACAGGCTCCGGCACTCTTATCACAGCCGGTTATAGCC  
TCTACATGTTCTTAATGACCCAACGAGGCCCTCTCCCAACACATGTAATTGCACTTG

AACCATCACACACCCGAGAACACCTTCTTATTGCCTTCATCTCATTCTCTTGTTCCT  
CTCGTGCTTAAGCCCGAGCTGATCTGAGGTTGAACTGCCTATGACCCCCACACACTT  
TGCTTCTCCTCAGCCTTTTTTCTAGGTTTAACAGGCCTGGCATTCCACCGGTTCCAC  
CTCCTCTCCGCGCTATTGTGCCTTGAAGGGATGATACTATCCCTATTTGTTGCCCTCT  
CTCTGTGAACACTTCAACTAGACTCAACTAACTTTTCGGCATCTCCCATGCTCCTCCT  
TGCATTTTCAGCCTGCGAAGCAAGCGCCGGGCTCGCCCTTCTAGTTGCGACTGCCCCG  
AACCCATGGGACCGACCGACTACAAAGCCTAAACCTCCTCCAATGCTAAATGCACC  
CCACCTCCCTAATGATCTCATCAAGCTTGGTTACAATCTTCGCATTACTAGCCTACCC  
CCTGGTCACCACAATTCGTCCAACGCCCCGGGGCCCCCAATGGGCAACATCCCATGT  
CAAAACAGCTGTAAAAATAGCTTTCTTTGTTAGCCTCTTACCCCTGGCCCTGTTTCTT  
AATGAAGGTGCCGAGACAATTGTTACTAATTGAACCTGAATAAACACAAACACCTT  
CGACATTAACATTAGCCTAAAATTTGACTTTTATTCGATTATTTTTACACCAATCGCC  
CTTTACGTCACTTGATCTATTCTAGAGTTTGCATCATGGTATATGCACGCTGACCCAC  
ACGTGAACCGCTTTTTTAAAGTACCTTCTGACATTTCTAATTGCCATGATCATTCTAGT  
AACCGCAAACAACATATTTCAACTCTTTATCGGTTGAGAAGGTGTAGGAATCATATC  
ATTCCTCCTCATCGGGTGGTGGTACGGACGGGCGGACGCTAACACTGCAGCACTCCA  
AGCAGTCCTATACAACCGTGTTGGGGATATCGGGCTTATCTTCGCCATGGCTTGAAT  
AGCAACAAACCTGAACTCCTGGGAAATGCAACAAATCTTTGCAACCTCCAAAGACA  
TGGACTTGACCTACCCCTCCTCGGACTAATCGTTGCAGCAACTGGGAAGTCGGCTC  
AGTTTGGACTCCACCCTTGGCTACCCTCAGCCATGGAGGGTCCTACACCGGTATCTG  
CCCTACTTCATTCTAGCACAATAGTTGTTGCCGGCATTTCCTGCTAGTACGAATGAG  
CCCCCTTCTGGAAAATAACCCGACTGCCCTCACAACCTGCCTTTGTCTTGGTGCCCTT  
ACGACTCTATTACAGCAACTTGTGCCCTCACCCAGAATGATATCAAAAAAATCGTC  
GCATTCTCTACATCAAGCCAGTTGGGACTTATAATGGTAACTATTGGACTAAACCAG  
CCCCAACTAGCATTCTCCACATCTGTACACACGCTTTCTTTAAAGCCATACTGTTTC  
TTTGTTCTGGGGTCTATTATCCACAGCCTAAACGACGAACAAGACATCCGAAAAATA  
GGCGGCATGCACCACCTTGCACCTTTTACATCATCTTGCCTAACAAATCGGCAGCCTC  
GCCCTCACAGGTACCCCTTCTTGGCCGGTTTCTTCTCTAAAGATGCCATCATCGAA  
GCATTAAACACATCCCACCTAAACGCCTGAGCCCTAACCTTACTCTCCTGGCCACA  
TCTTTCCTGCAATCTACAGCTTCCGGGTAGTCTTCTTTGTGCCCATGGGCCATCCCC  
GATTCAGCCCATCTCCCCAATTAACGAGAACAACCCAGCAGTAATTAACCCACTTAA  
ACGACTAGCATGAGGCAGCATCATTGCAGGACTGCTAATTACCTCAAACATTACACC  
TCTAAAAACACCTGTGATATCTATGCCTCCCCTTCTTAAACTAGCCGCCCTCGCAGTT  
ACAATCCTAGGTCTACTTGTGCTATAGAATCGCCATATTAACCAACAAGCAGTTT  
AAATCAACCCCAAGTCTTAACGTACACAATTTCTCCAACATACTAGGCTTCTTCCCTG  
CCATCGTACATCGCCTGACCCCAAAATTGGGCCTAGTCCTCGGCCAAGACATCGCCA  
ACCAAATAGTAGATCAAACCTGACTAGAGAAAGCGGGCCCAAAAGCCATTGTATCC  
TCCAACCTACCCCTGGTTTCTTCTACAAGTAATATCCAACGAGGGATAATCAAAACG  
TATCTACTCTTTTCTTTTAAACACTAGCCCTTATAATCCCCACACTCATCCCTAATG  
ACTTTTGTATATATTTAGTTTTATTTTCTCTTGTGTTGGGGTTAGTCGCAGTTGCTTC  
TAATCCGTCCCCCTACTTTGCTGCTTTGGGGTTAGTTGTGGTAGCTGGCATGGGGTGT  
GGTGTACTAGTCGGGCATGGGGGGCCATTTTGTCTTAGTTCTTTTCTAATTTACT  
TGGGCGGGATGTTAGTTGTGTTTGCATATTCAGCAGCGTTAGCTGCTGAGCCATAACC  
CCGAGAGCTGAGGTAGCTGGTCGGTAATGGTGTATGGTTGTTTATGTGGCGGGGGTA  
GTGTAGTTTCTGGGCTGTTCTGAGGCGGGTGGTATGAATCGTCATGGGTTTTAGTAG  
ATGAGCTGGCCGAATTCTCGGTATTCCGGGGTGATATTGGAGGAGTGGCCTTAATAT  
ACTCTTCTGGGGGATGGTTACTGATCATTAGTGCATGGGTGCTGCTTCTTACCCTGTT  
TGTAGTCCTTGAGTTAACCGTGGTTTGGAGCCGAGGGGCGTTGCGACGGTT"/>

<sequence id="seq\_Pleuronichthys\_cornutus\_JQ6390711" spec="Sequence"  
taxon="Pleuronichthys\_cornutus\_JQ639071" totalcount="4"  
value="ATGACACTAAGCCTATTTGACCAATTTGAATCCCCCGTACTATTTACATCCC  
TCTAATTGTACTGGCAATTGCCCTTCCATGAGTACTACTTCTGTCCCCGGACTCGAT  
GAATTAGTAACCCCTACTAGCGTTTCAAGGCTGGTTTATTAAACAATTCACCTCAC  
AAATCCTCCTTCCCCTAAATACACCTGGGCATAAGTGAGCACTTCTCTTCGCCTCCCT  
CATCTTTCTCTTTCTATTAACGTGCTTGGACTTCTTCCTTACACCTTCACACCTACTA  
CTCAACTATCCTTTAACCTAGGACTTGCAGTACCCCTATGACTAGCAACAGTAATTA  
TGGAATACGTACCCAACCGACACATGCATTAGGTCACCTTCTACCAGAAGGTACTCC  
AACTGCCTTAATTCCTGTGCTAGTCATTATCGAAACAATCAGCCTATTTATTCGCCCT  
ATTGCCCTCGGTGTTTCGGTTGACAGCAAACCTTAACAGCAGGTCACCTCCTAATTCAA  
CTTATTTCAACAGCCACTTTTGTATATACTACCAATTATACCCACTGTTGCTATTTTAA  
CCACAACACTTCTGCTTCTTCTCACGCTCCTAGAAATTGCTGTTGCTATAATTCAGGC  
CTACGTCTTCGTCTTACTCTTAAGCCTCTACCTACAAGAAAACGTCTAATGCCTCAA  
CTCAACCCCGGCCCTTGATTTTTTCATTTTAGCTGTCTTATGACTTTTATTTTTATCTCT  
CGCACCCCGAGTACTTTTAAAACACCTCTTCCCTAACAAAATAACACCCGAAGGAA  
AATTAGAACAAAATATGACCCTGAACCTGACAATGACACTAAGTGGCAATCACACG  
TTGATTCTTCTCAACCAATCACAAAGACATCGGCACCCTCTATCTTGTATTTGGTGCC  
TGAGCCGGAATAGTAGGGACAGCCCTAAGCCTGCTTATTCGAGCAGAACTAAGCCA  
ACCCGGAGCCCTCCTTGGGGACGATCAGATTTATAATGTTATCGTTACTGCACACGC  
CTTTGTAATAATCTTCTTTATAGTAATACCAATTATGATTGGAGGGTTTGGAACTG  
ACTTATTCCTCTAATGATCGGGGGCCCTGATATAGCCTTCCCCCGAATGAACAACAT  
GAGCTTCTGGCTCCTTCCCCCATCCTTCCTCCTCCTTCTTGCCTCCTCAGGTGTTGAA  
GCTGGTGCCGGCACAGGATGAACTGTATATCCCCCTCTAGCCGGTAACCTAGCGCAT  
GCAGGGGCATCCGTAGACCTCACAAATTTTCTCACTTCACCTCGCAGGAATTTCTCA  
ATTCTAGGAGCCATTAACCTTCATCACTACTATTATTAATAAAAACCTACGGCTATA  
ACTATGTACCAGATCCCACTATTTGTCTGAGCCGTACTAATTACAGCTGTCTTACTCC  
TTCTCTCTCTCCCAGTTTTAGCCGCTGGCATCACAAATGCTACTAACAGATCGAAACCT  
CAACACAACCTTTCTTTGACCCTGCTGGAGGGGGTGATCCCATTCTTTATCAACACTT  
GTTCTGATTCTTCGGTCACCCAGAAGTCTACATTCTGATTCTCCCAGGCTTCGGAATA  
ATTTACACACATTGTTGCCTACTACGCAGGCAAAAAAGAACCCTTCGGCTACATGGGG  
ATGGTCTGAGCTATAATAGCAATTGGCCTCCTTGGGTTTATCGTCTGAGCCCATCAC  
ATGTTACACAGTTGGGATGGATGTTGACACACGTGCATATTTTACATCCGCCACAATA  
ATTATTGCAATTCCAACCTGGTGTAAGTATTTAGTTGACTCGCCACACTTCATGGA  
GGGGATATTAAGTGAGAAACACCCCTACTATGAGCACTCGGTTTTATCTTCCTATTT  
ACAGTCGGAGGTCTAACTGGAATTGTATTGGCTAACTCATCACTGGACATTGTTTTA  
CACGACACATACTACGTCGTAGCCCATTTCCACTACGTCTTATCTATAGGCGCTGTCT  
TCGCTATTGTTGCTGCTTTTCGTACACTGATTCCCCCTATTTACAGGCTACACTCTTCA  
CGAAACATGAACCAAAGTTCATTTTGGCGTAATGTTTCGCAGGGGTAAACTTAACATT  
CTTCCCACAACATTTCTTAGGATTAGCCGGAATACCCCGACGATACTCGGACTACCC  
AGATGCCTTTACTCTGTGAAACACAGTTTCATCATTTGGCTCCCTAGTGTCCCTAGTT  
GCCGTAATTATGTTCTTGTTCATCATTTGAGAAGCATTTACAGCCAAACGAGAAGTT  
CAATCAGTAGAACTAACCGCAACTAATATTGAATGACTTCACGGCTGCCCCCACCT  
TATCACACATTTGAAGAACCTGCATTTGTTTCAGGTACGAATAGACTAAATGGCCCAT  
CCCCTACAACCTTGGATTTCAAGATGCAGCTTCACCACTAATAGAAGAGTTACTTCAC  
TTTCACGACCACGCCCTAATAATTGTTATTCTTATTAGCGTAATAGTACTTTACATTA  
TTGTAGCTATGGTTACAGCTCAATTTACAGATAAGCTTGTGCTCGACTCCCAAGAAA  
TCGAGATTATCTGAACAATTCTTCCAGCTATTATTCTTATTCTTATTGCTCTACCATC

CCTCCGAATTTTATACCTAATAGATGAGATTAATAGCCCCGCACCTTACAGTAAAAGC  
TTTAGGCCACCAATGATACTGAAGCTATGAATATACAGATTACGATGACCTTGGCTT  
TGACTCGTATATAATTCCCACACAAGACCTCACCTCCGGCCAATTCCGACTTTTAGA  
AGCAGACCATCGCATAGTAGTCCCCGTAGAATCCCCTGTTTCGAGTTTTAATTACCGC  
CGAAGATGTCCTTCATTCATGAGCAGTACCAGCCCTAGGCACAAAAGTCGATGCTGT  
CCCAGGACGATTAAACCAAGCAACTTTTACTATCAGCCGGCCAGGCGTATTCTTTGG  
TCAATGCTCTGAAATTTGTGGGGCTAATCACAGCTTCATGCCAATTGTTGTAGAAGC  
AGTTCCCCTAGAACACTTCGAATCCTGATCTTCATTAATAATTGAAGAAGCCTATGG  
CCCATCAAGCACACCCATTTACATAGTCGACCCCAGCCCCCTGGCCCCCTTACAGGCG  
CCATCGCTGCCCTACTAATAACGTCCGGCCTTGCTATCTGATTTCACTTCCACTCTAC  
AACCCTGATAACTTTAGGTACAATTCTTCTCATTTTAACAGCTTTCCAATGATGGCGA  
GATGTTGTTTCGAGAGGGTACCTTTCAAGGTCACCACACCCCACCAGTCCAAAAAGG  
GCTTCGGTACGGTATGATCCTCTTCATTACCTCCGAAGTTCTGTTCTTCTTGGGCTTT  
TTCTGAGCTTTTTATCACTCAAGCCTAGCACCCACCCCTGAGCTAGGCGGTTTCTGAC  
CACCAGCTGGCATTACCCCTCTGGACCCATTTGAAGTACCCCTACTCAATACAGCAG  
TCCTTCTTGCCTCAGGCGTTACAGTCACATGAGCCCACCACAGCATCATAGAAGGTC  
AACGAAAACAAGCCCTTCAATCCCTTGCACTTACAATCTTACTCGGAGGCTACTTCA  
CTTTCCTTCAAGCCCTTGAATACCACGAAGCCCCCTTTACTATTGCAGACGGGGTGT  
ATGGCGCCACATTTTTTTGTGGCTACTGGCTTTCACGGCCTCCACGTATTAATTGGCTC  
TTCATTTTTAGCTGTCTGCTTTCTCCGCCAAGCCCTCCACCATTTACATCAAACCAC  
CATTTTGGGTTTGAAGCAGCCGCATGGTACTGACACTTCGTAGACGTCGTCTGACTC  
TTCTCTACATCTCTATTTACTGATGAGGATCTTAATGGCCAGCCTACGAAAGTCCC  
ACCCCTTTTTAAAAATCGCAAACCATGCTTTAGTCGATCTCCCATCCCCCTCCAACAT  
CTCTGTTTGATGAAATTTTGGATCCCTTCTAGGACTGTGCTTAATTATTCAAATCGTA  
ACAGGCCTCTTCTTAGCTATACACTATACCTCAGATATTGCAACTGCTTTTACCTCTG  
TAGCCACATTTGCCGAGACGTCAACTACGGTTGGCTAATTCGAAATGTGCATGCCA  
ACAGCGCATATTCTTTTTTATTTGCATCTACCTTCACATTGGCCGAGGCCTCTACTA  
CGGCTCGTACCTCCAAAAGGAAACATGAAACGTTGGTGTCGTCCTTCTTCTACTCGT  
CATAATAACAGCCTTTGTTGGATACGTTCTCCCCTGAGGTCAGATGTCATTYTGAGG  
CGCAACCGTCATTACCAACCTTCTCTCTGCGGTACCCTATGTTGGTAACACGCTGGT  
CAATGAATCTGAGGCGGATTTTCTGTAGACAATGCTACTCTCACCCGATTCTTCGCA  
TTTCACTTCCTTTTTCTTTCATTATTGCAGCCGCAGCAGTAATTCACCTACTCTTCCT  
GCACGAAACAGGCTCAAACAACCCACCGGTCTTAATTCAGACTCTGATAAAATCC  
CCTTCCACCCCTACTTCTCGTATAAAGACCTCTTGGATTGCAATCCTTCTTACAGCT  
TTGGCATCCCTTGCCCTATTCTCCCCCAATCTCTTAGGAGACCCCGACAACCTTACCC  
CCGCAAACCCGCTTGTTACACCCCTCATATTAAGCCAGAATGATACTTCCTGTTTG  
CATATGCTATTCTACGCTCCATCCCCAACAAGTTGGGAGGAGTACTTGCCCTCTTGTT  
CTCCATCCTAATCCTTATGCTTGTGCCCCCTCTCCACACCTCTAAACAACGAAGTCTT  
ATATTCCGCCCCCTTCTCGCAATTCTTCTGATCCTTAGTAGCAGATGTAATGATCC  
TTACCTGAATCGGAGGAATGCCCGTTGAACACCCCTTTGTTATTATTGGACAGGTTG  
CATCATTTCTCTACTTCTTCCTATTCTTGGTACTAATCCCCCTAACAGGTTGACTGGA  
AAACAAAGCATTAGCTTGAAAATATGATTTTCGACCCTCATCACACATGTTTTTAACC  
CCCTACTATTCAATTGTTCTGTATTACTAGCCGTAGCATTCTGACCTTACTTGAACG  
GAAAGTCCTTGGCTACATACAACTCCGAAAAGGACCAAACGTCGTAGGACCCTACG  
GCCTTCTTCAACCCATCGCCGATGGCATTAACTATTTATTAAGAGCCCGTACGAC  
CCTCCACCGCTTCCCCTGTTCTTTATCCTTGCCCCCATGCTCGCACTCACCCTAGC  
TCTCGCACTTTGAGCCCCCATACCCCTTCCACACCCCATAGCTGACCTTAACCTCGGT  
ATCTTGTTTGTCTTAGCATTGTCCAGCCTTGCAGTTTATTCCATCTTAGGTTTCAGGCT

GAGCCTCAAACCTCAAATATGCACTCATCGGGGCTCTCCGGGCTGTTGCACAAACCA  
TCTCCTACGAAGTTAGCCTCGGCCTCATTTTACTCAACATTATTATTTTTTCCGGCAG  
CTTCACTTTACAAACCTTTAACACAACCCAAGAAGCCATCTGATTAATTGTCCTGC  
CTGACCTTTGGCTGCCATGTGGTATGTTTCTACCCTAGCAGAGACAAACCGAGCACC  
TTTCGACCTAACGGAAGGTGAGTCTGAACTTGTTTCCGGGTTTAACGTAGAGTATGC  
AGGTGGACCCTTCGCCTTGTTTTTCTAGCTGAATACTCCAACATCCTTCTTATGAAC  
ACCCTCTCTGCAGTACTATTCTTGGGAGCTTCTCATATCCCAACTTTTCCAGAATTAA  
CAAGTATTAATCTTATAACCAAAGCCGCTCTTCTCTCAGTAGTGTTCTTATGGGTCCG  
AGCCTCATACCCCCGATTTTCGTTACGACCAACTTATGCACCTCACCTGAAAAAGCTT  
TCTCCCTCTCACACTGGCATTAGTTATTTGACATTTAGCTCTCCCTATTGCATTTGCG  
GGCCTCCCACCACAACCTGTAGATGAATCCTTACATCTTAACCACCCTTCTATTTGGCT  
TAGGTCTTGGTACAACACTTACATTTGCAAGCTCTCACTGACTCCTTGCTTGAATAG  
GCCTTGAAATTAACACTCTCGCTATTCTTCCCCCTTAGCCCGGCACTACCACCCCCG  
AGCAGTTGAAGCTACCACTAAGTACTTCCTTACACAAGCTGCAGCAGCCGCCACCCT  
CCTTTTTGCAACTATAACCAACGCTTGACTTACAGGCCAATGAGATATTCAACAAAT  
GACTCATCCCCTCCCAACAACAATAATTATCGTTGCCCTAGCCCTAAAAATTGGCCT  
TGCACCAGTGCACCTCCTGACTACCAGAAGTTCTTCAAGGTCTCGACCTAACCACTGG  
ATTAATCCTCTCTACTTGACAGAACTTGCCCCCTTCGCCCTCCTCATACAAATTCAG  
ACAACAACCCCCACCCTCTTATTATTATGGGGTTACTTTCTACCTTGTTGGGGGTTG  
AGGTGGCCTCAATCAAACCCAGCTACGCAAGATTCTTGCTTACTCCTCAATTGCCCA  
CCTCGGCTGAATAGTTTTGATTCTCCAATTCTCACCCACCCTTACCCTCCTTACACTT  
CTTGCGTATATTCTATAACTTTATCAATATTTTTAATTTTCAAATAAATAAAGCCAC  
CACCATTAATGCCCTTGCTATCTCCTGATCTAAAACCCCAGCTCTTACGGCACTAAC  
CCCTCTCATCCTTCTCTCTCTTGGAGGCTTACCCCCTCTTACAGGTTTTATGCCGAAA  
TGACTTATCCTTCAAGAATTTACTAAACAAGACTTACCCTGCTTGCCACCCTTGCCGC  
ACTTACTGCCCTCCTTAGCCTCTACTTCTATTTACGCCTCTCCTATGCCATAACGCTC  
ACCATATTCCCCAATAACCTTGTAGGCGCAACCCCCTGACGGCTTTACAACCTCCCAA  
CTTACTCTCCCTCTCGCCACATCCACCACGGCGACTATTCTTCTCCTTCCACTAACCC  
CCGCTGCTCTAGCACTACTTACCACCTATGAACCTTCTCCTAACTATTGTTACAATTA  
CAGCCCTTCTATCTATAATCCTCATAATTGTCTCTTTTTGGCTTCCCCAAATGACACC  
TGATTATGAAAAACTTTCGCCATACGAATGCGGCTTCGACCCGGTAGGTTACAGCGC  
ACTACCTTTTTTCACTACGATTTTTTTTTAATTGCCATCCTCTTTCTTCTGTTTGACCTAG  
AAATTGCACTCCTCCTCCCCCTCCCCTGAGGAGACCAACTAGCATCACCGTTACTAA  
CGTTCTTGTGAGCTACAGGCGTCCTTTCCCTCCTAACCTTGGCCTCGTATACGAATG  
AATTCAAGGAGGCCTAGAATGGGCTGAATATGCTAATAATCTTAATCCCAACACTTA  
TATTAATCCCAACAGCCTGGTTAACTAAACCAACCTGATTATGGCCAACAACCTTTAA  
CGCATAGCTTTTGCATCTCCCTAGTTAGCTTATCGTGATTAAAAACATCTCAGAAA  
CCGGGTGATCCTCTCTCAACTCATGAATAGCCACCGACCCGCTGTCAACACCTCTGC  
TCGTTCTTACATGCTGACTACTACCCCTCATAATCCTAGCAAGCCAAAACCATACCA  
CCTCAGAGCCTGTCAACCGCCAACGCATGTATATCACACTTCTAACCTCCTCCAATT  
TTTTCTGATCCTAGCATTTAGCGCCACTGAACTAATTATGTTTTATGTTATATTTGAG  
GCCACCCTTATCCCCACTTTAATTATTATTACCCGCTGAGGAAACCAGACAGAACGT  
TTAAACGCAGGAACCTACTTCTTCTTACACACTAGCAGGCTCCCTACCCCTCCTTG  
TTGCCCTTCTCCTTCTGCAAAACACAACAGGCACTCTATCCCTACTAACCTCCACTA  
TGCAAACCCCTACAATAATGTCACACGCAGACAAACTCTGATGAGTGGGCTGCCTTC  
TAGCCTTCTAGTCAAGATACCTCTTTATGGGGTACACCTATGACTCCCTAAAGCAC  
ACGTTGAAGCCCCCATTGCAGGCTCAATAATCCTTGCAGCCGTTCTCCTTAAATTAG  
GGGGATACGGAATAATTCGCGTAATACCAACCCTAGAGCCCCTAACCAAGGAACATA

AGTTACCCCTTTATTATCTTTGCACTTTGAGGTGTAATTATAAAGTGGCTCCATTTGCC  
TCCGCCAGACCGATCTAAAATCACTAATTGCTTACTCCTCTGTAGTCACATAGGCC  
TTGTGGCTGGAGGAATCCTCATCCAGTCGCCCTGAGGCCTGACAGGTGCGCTTACCC  
TTATAATTGCCACGGCCTAACTTCCTCCGCCCTCTTTTGCCTAGCAAATACTAATTA  
TGAGCGAACCCACAGCCGAACAATGGTCCTAGCACGCGGCCTTCAAATAGCGCTTC  
CTCTGATGGCAACTTGATGATTTATTGCCAGCCTAGCTAACCTCGCTCTCCACCTCT  
ACCAATCTTATGGGAGAATAATAATTATCACTTCTTTATTTAACTGGTCTTGATGA  
ACCCTAGCACTCACAGGTGCAGGCACCCTAATTACAGCTGCTTATTCTCTCTATATA  
TTTTTAATAACCCAGCGGGGCCCCCTCCCAACACATGTTATAGCACTTAACCCCTCA  
CACTCTGAGAACACCTTCTCATCGCCTTCACCTCACTCCCTTAGTCCTATTAATACT  
CAAACCCGAATAATCTGAGGCTGAACTGCTTATGACCCCCACACATTTTGCCTTTT  
CCTCAGCCTTTATCTTAGGCCTGACAGGCCTGGCATTCCACCGGTCCCATTTACTGTC  
TGCCCTTTTATGCCTTGAAGCAATAATATTGTCCCTATTTGTTGCCCTCTCCCTGTGA  
ACACTTCAACTAGACTCCACTAATTTCTCAACATCCCCCATGCTTCTCCTCGCATTTT  
CAGCCTGTGAAGCAGGCGCTGGCCTGGCCTTACTAGTTGCTACTGCCCGCACCCACG  
GGACTGATCGCCTACAAAGCCTAACTTACTACAATGCTAAATGCAGCCCACTTCTC  
TAATGATCTCGTCAAGTTTAATCACCATTTTTATGCTGTTAAGCTACCCATTACTTAC  
CGCACTCCTTCTACCCCTCGGAGTTCGATTGGTCTACTTCCCACGTCAAAACAGC  
AGTAAAAATAGCCTTCTTTGTTAGTCTTCTCCCTCTAGCCCTCTTTTTAAATGAAGGC  
GCAGAAACAATCGTTACAAACTGAACATGAATAAACACACACTCCTTCGACATTAG  
CATCAGCCTAAAATTCGATTTTTACTCAATTATTTTTACACCTATTGCCCTCTATGTG  
ACATGATCCATCTTAGAGTTTGCATCCTGATATATACACTCTGACCCCTATATAAGC  
CGTTTCTTTAAATACCTCCTCACCTTTCTAATTGCTATAATTATCTTAGTAACCGCAA  
ACAACATATTTCAACTTTTTATCGGCTGAGAAGGCGTAGGCATTATATCGTTCCTTCT  
TATTGGGTGATGGTACGGCCGAACAGATGCAAATACTGCAGCCCTCCAAGCTGTTTT  
ATATAACCGGGTAGGAGATATCGGACTTATCTTCGCCATGGCTTGAATAGCAACGA  
ACTTAAATTCCTGGGAAATGCAGCAAGTGTTGCAAGCTCCAAAGGCATAGACCTG  
ACTTACCCCTTCTTGGGCTAATCATTGCAGCCACTGGAAAATCAGCCCAATTTGGG  
CTCCACCCTTGGCTGCCATCCGCCATAGAGGGCCCTACACCGGTGTCTGCCCTACTT  
CACTCCAGCACCATAGTCGTTGCCGGTATTTTTTTTACTGGTGCGAATGAGCCCCCTCC  
TGGAGGATAACCCCACTGCCCTGACAGTCTGCCTGTGCCTCGGAGCTTTAACCACCC  
TATTTACTGCCACATGTGCTTTAACTCAAAACGACATTAAAAAAATCGTTGCATTTT  
CCACATCAAGCCAACTAGGGTTAATAATAGTAACCATCGGCTTAAATCAACCACAA  
TTAGCATTCCTTCACATCTGCACACACGCCTTTTTTAAAGCCATACTATTCTTGTGCT  
CCGGATCTATTATCCACAGCCTAAACGACGAGCAAGACATCCGAAAAATAGGGGGT  
ATACACCACCTTACGCCCTTTACATCTTCATGTCTGACTATCGGAAGCCTCGCCCTTA  
CGGGTACACCCTTCCTAGCGGGCTTCTTTTCAAAGACGCCATTATTGAAGCACTAA  
ACACATCCCACCTAAACGCCTGAGCCCTCACCTCACTCTCCTAGCCACCTCTTTTAC  
AGCAATCTACAGCTTTCGGGTAGTATTCTTTGTCCCCATGGGTCTACCCAGATTAAAC  
CCCTTTCCCCCATTAATGAGAACAACCCGGCAGTCATCAACCCACTTAAGCGGTTAG  
CCTGGGGAAGTATTCTCGCAGGACTGCTTATTACCTCTAATATTACGCCTTTAAAGA  
CCCCAGTTATGTCAATACCCCTAACCCTTAAATTAGCCGCTCTTCTGGTCACGATCGT  
TGGCCTTCTTATTGCCCTAGAACTTGCCATATTAACCAACAAACAATTTAAAGCAAC  
ACCATTCCTTACACACACAACCTTCTCAAATATACTTGGCTTCTTCCTGCCATCGTTC  
ACCGCTTAACCCCTAAGCTAGCCCTAACTCTTGGCCAAGGTATTGCCAGTCAAATAA  
TGGACCAAACCTGATTAGAAAAAACTGGCCCTAAAGCCATCACATCCCTAAGCCTC  
CCCATAGTTACCATAACAAGCAACATCCAACAAGGCATGATTAAACATATCTTTTC  
TTTTTGTCTAACTCTCGCCCTTATAATTGCCATGCTATTTGCCTAATGACCTTTATTA



TATATTTGATTTTATTTTGTGTTTGTCTAGGTTTAGTTGCGGTTGCTTCTAACCCCTCC  
CCCTACTTTGCTGCCTTAGGGTTGGTTGTGGTGGCTGGGATGGGGTGTGGGCTACTA  
GTTGGGTGTGGAGGGCCTTTTTTATCGTTAGTGCTTTTTTTAATTTACTTGGGCGGGA  
TGTTAGTTGTGTTTGTCTATTTCAGCAGCATTGGCTGCTGAGCCATACCCCGAGAGTT  
GAGGGAATCGGGAAGTTTAACTTATGGTACTTTATGCGGGAGGGGTTGTGTAATCT  
CTGCGTTGTTTTGAGGGGGGTGGTATGAGTCTTCATGAGTGTTAGTAGATAATTTTA  
ATGAGTTTTCTGTGTTTCGTGGGGATGTGGGTGGTGTGCTTTAATATACTCTTCTGG  
GGGTTGGATATTAATTATTAGTGCGTGGGTCTTTTTTTAACTCTGTTTGTAGTTTAA  
GAATTAACCGGGGTATAAGTCGGGGGGCCCTTCGACTGTTT"/>

<sequence id="seq\_Pleuronichthys\_japonicus\_KY0386551" spec="Sequence"  
taxon="Pleuronichthys\_japonicus\_KY038655" totalcount="4"  
value="ATGACACTAAGCCTATTTGACCAATTTGAATCACCTGTACTATTTACATCCC  
TCTAATTGTACTAGCAATTGCCCTCCCATGAGTACTATTCCCTGCCCCTGGACCCGAT  
GAATTAGTAACCCCTACTAGCATTTC AAGGATGATTTGTTAAACACTTCACCTCAC  
AAATTCTTCTCCCACTAAATACACCCGGGCATAAATGAGCACTTCTCTTCGCCTCCCT  
CATCTTTTCTTCTCTATCAATGTGCTCGGGCTTCTTCCTTACACCTTTACACCTACTA  
CTCAACTATCTTTTAACTTAGGACTTGCAGTACCCCTCTGACTAGCAACAGTAATTAT  
GGGATGCGCACCCAGCCAACACACGCATTAGGACACCTCTTGCCTGAAGGCACCCC  
AACTGCTTTAATTCTGTACTCGTTATTATCGAAACAATTAGTCTGTTTATTCGCCCT  
ATTGCTCTAGGTGTCCGATTAACAGCAAACCTAACAGCAGGCCACCTCCTGATTCAA  
CTTATCTCAACAGCTACTTTCGTTCATGCTCCCGATTATGCCTACTGTTGCTATTTTTA  
CCACAACACTTCTGCTTCTTCTTACCCTCCTAGAAATTGCTGTTGCTATAATTGAGC  
TTATGTCTTTGTCTTACTCCTAAGCCTTTACCTACAAGAAAACGTCTAATGCCTCAAC  
TCAACCCCGGCCCTTGATTTTTTCATCTTAGCTGTTTTATGACTTTTATTTCTATCTCTC  
GCACCCCGAGTACTTTTAAATACCTCTTCCCTAACAAAATAACACCCGAAGGAAA  
GTTAGAACAACCATAACCCTGAACCTGACAATGACACTAAGTGGCAATCACACGT  
TGATTCTTCTCAACCAATCACAAAGACATCGGCACCCCTCTATCTTGATTTGGTGCCT  
GAGCCGGAATAGTGGGAACAGCCCTAAGTCTACTCATTCGAGCAGAACTGAGCCAA  
CCCGGAGCCCTTCTTGGGGACGATCAGATTTATAATGTTATCGTCACTGCACACGCC  
TTTGTAATAATCTTCTTTATAGTAATACCAATCATGATTGGAGGATTTGGAACTGG  
CTTATTTCCCTAATGATTGGGGCGCCTGATATAGCCTTCCCTCGAATAAAATAACATG  
AGCTTCTGGCTTCTACCACCATCTTTCCTCCTTCTCCTCGCTTCTTCAGGAGTTGAAG  
CCGGCGCCGGTACAGGGTGGACAGTGTATCCCCCTCTGGCTGGTAACCTGGCACATG  
CCGGAGCATCCGTAGACCTTACAATCTTTTCACTTCACCTCGCAGGAATTTTCGTCAA  
TTCTAGGGGCCATCAACTTCATTACTACTATTATTAATAAAAACCCACGGCTATAA  
CTATATACCAAATCCCACTATTTGTTTGAGCCGTACTAATTACAGCTGTTCTACTGCT  
TCTTTCTCTCCAGTTTTAGCCGCTGGTATCACAATGCTTCTAACGGATCGTAACCTC  
AACACAACCTTTCTTTGACCCTGCTGGAGGGGGTGATCCCATTCTTTACCAACATTTAT  
TCTGATTCTTTGGTCACCCGGAAGTGTATATTCTAATTCTCCAGGTTTCGGAATAAT  
TTCACACATTGTTGCCTATTATGCAGGCAAAAAAGAACCCTTTGGTTACATGGGGAT  
GGTCTGAGCTATAATAGCAATTGGCCTCCTTGGATTTATCGTCTGAGCCCACCACAT  
GTTTACGGTTGGCATGGATGTTGACACACGTGCATATTTTACATCCGCCACAATAAT  
TATTGCAATTTCCCACTGGTGTAAGTATTGAGTTGACTCGCTACACTTCATGGAGG  
TGATATTAAATGGGAAACACCCCTACTATGAGCACTTGGTTTTTATTTTCTATTTACA  
GTGGGAGGCCTAACTGGAATTGTTTTAGCTAATTCATCACTAGACATTGTTTTACAT  
GACACATACTATGTCGTAGCCCACTTTCACTACGTCTTATCTATGGGTGCTGTCTTCG  
CCATTGTTGCTGCTTTCGTTCACTGATTCCCCCTATTTACAGGCTATACTCTCCACGA  
AACATGAATAAGTTTCAATTTTGGCGTAATGTTTCGCAGGAGTAAATTTAACATTCTT

CCCACAACATTTCTTAGGCCTAGCCGGAATACCCCGACGATACTCAGATTACCCAGA  
TGCCTTTACTCTGTGAAACACAGTTTCATCATTTGGCTCCCTAGTATCCCTAGTTGCC  
GTAATTATGTTTTTATTTATTATTTGAGAAGCATTTACAGCCAAACGAGAAGTTCAA  
TCGGTAGAACTAACCGCAACTAATATTGAATGGCTTCACGGCTGCCCCCGCCTTAT  
CACACATTTGAAGAACCTGCATTTGTTTCAGGTACGCATAGACTAAATGGCCCATCCC  
CTACAACCTTGGATTTCAAGATGCAGCTTCACCACTAATAGAAGAATTACTTCACTTT  
CACGACCACGCCCTGATAATTGTTATTCTTATTAGCGTAATAGTACTTTACATTATTG  
TAGCCATGGTTACAGCTCAATTTACGGATAAACTTGTGCTTGACTCCCAAGAAATCG  
AAATTATCTGAACAATTCTCCCAGCTATTATTCTTATTCTTATTGCCCTACCATCTCT  
CCGAATTTTATATCTAATAGACGAAATCAACAGCCCCCACCTTACAGTAAAAGCTTT  
AGGTCACCAGTGGTACTGGAGCTATGAATACACAGACTACGATGACCTTGGCTTTGA  
CTCATACATAATCCCCACGCAAGATCTCAGCTACGGCCAATTCCGACTTTTAGAAGC  
AGACCACCGCATAGTAGTCCCTGTAGAATCCCCCGTTTCGAGTTTTAATTACCGCCGA  
AGACGTCCTTCATTTCGTGAGCAGTGCCAGCCCTAGGCACAAAAGTCGATGCTGTTCC  
GGGACGACTAAACCAAGCAACTTTTACCATTAGCCGGCCAGGCGTATTCTTTGGTCA  
ATGCTCTGAAATTTGCGGAGCCAATCACAGCTTCATGCCAATTGTTGTAGAAGCAGT  
TCCCCTTGAACACTTCGAATCCTGATCTTCATTAATAATTGAAGAAGCCTATGGCCC  
ATCAAGCACACCCATTTACATAGTCGACCCCAGCCCCTGGCCCCTTACAGGTGCCA  
TTGCTGCCCTACTAATAACGTCCGGCCTTGCTATCTGATTTCACTTCCACTCTACGAC  
CCTTATAACTTTAGGAACAATTCTTCTTATTTTAACAGCTTTCCAATGATGGCGAGAC  
GTTGTCCGAGAGGGTACCTTTCAAGGTCACCACACCCCACCAGTCCAAAAAGGGCTT  
CGATATGGTATGATCCTCTTCATTACCTCAGAAGTTCTCTTCTTCTCCTCGGCTTTTTCTG  
AGCTTTTTATCACTCAAGCCTAGCACCCACCCCTGAACTAGGCGGCTTCTGACCACC  
CGCTGGTATTACCCCTTTAGACCCCTTCGAAGTACCCCTACTCAATACAGCAGTCCTT  
CTTGCCTCAGGCGTTACAGTTACATGGGCACACCACAGCATTATAGAAGGGCAACG  
AAAACAAGCCCTTCAATCCCTCGCACTTACAATTTTACTTGGAGGCTACTTTACCTTC  
CTCCAAGCCCTCGAGTACCATGAAGCCCCCTTTACTATTGCAGACGGGGTGTATGGT  
GCCACATTTTTTTGTGGCTACTGGCTTTCACGGCCTCCATGTGTTAATTGGCTCTTCAT  
TTTTAGCTGTTTGCTTTCTCCGCCAAGCCCTTCACCATTTTACATCAAACCATCATTTT  
GGGTTTGAAGCAGCCGCATGGTATTGACATTTCTGTAGACGTCGTCTGACTTTTCCTCT  
ACATCTCCATTTACTGATGAGGATCCTAATGGCCAGCCTACGAAAGTCCCACCCCT  
TTTAAAAATCGCAAACCATGCTTTAGTCGATCTCCCATCCCCCTCCAACATCTCTGTT  
TGATGAAATTTTGGATCCCTTCTAGGACTCTGCTTAATTATCCAAATCGTAACAGGC  
CTTTTCTTAGCCATGCATTATACTTCGGATATCGCAACCGCTTTTACCTCCGTAGCCC  
ACATTTGCCGAGACGTCAACTACGGCTGATTAATTCGAAATGTTACGCCAACAGCG  
CATCATTTCTTTTTTATTTGCATCTACCTTCACATTGGCCGAGGCCTCTATTACGGCTC  
GTACCTACAAAAAGAAACATGAAACGTTGGGGTAGTTCTTCTCCTACTCGTCATGAT  
AACAGCCTTTGTTGGCTATGTCCTCCCCTGAGGTCAAATGTCATTTTGAGGTGCAAC  
CGTCATTACTAACCTTCTCTCTGCTGTACCCTACGTCGGCAACACCCTAGTTCAATGA  
ATCTGAGGGGGATTTTCTGTAGACAATGCTACTCTCACCCGATTCTTTGCATTTCACT  
TCCTTTTCCCCTTTATTATTGCAGCTGCAGCAATCATTCATTTGCTTTTCCTACACGA  
AACAGGCTCAAACAACCCACAGGCCTTAACCTCAGACTCTGACAAAATCCCCTTTCA  
TCCCTATTTTTCTGTATAAAGACCTCTTGGATTTCGCCATCCTCCTCACTGCCCTAGCAT  
CCCTTGCCCTATTCTCTCCAATCTCTTGGGCGACCCCGACAACCTTCACCCCGCAA  
ACCCACTTGTCACACCCCTCACATTAAGCCAGAATGGTATTTCTGTTTGCATATGC  
TATTCTACGCTCTATTCTAACAATTGGGAGGAGTACTTGCTCTATTGTTTTCTATC  
CTGATCCTGATACTTGTACCCCTCCTTCACACATCTAAACAACGAAGTCTAATATTCC  
GCCCTTCTCGCAATTCCTATTCTGATCCTTAGTAGCAGATGTAATGATCCTTACCTG

AATCGGGGGCATGCCCCGTTGAACACCCCTTTGTTATTATTGGACAAATCGCATCATT  
TCTCTACTTCTTCCTATTCCCTGGTATTAATCCCTTTAACAGGTTGACTGGAGAATAAA  
GCATTAGCTTGAAAATATGATTTTCGACCCTTATTACACATGTTTTTAACCCCTGCTA  
TTCATTGTTCTGTATTATTAGCCGTAGCATTCCTCACCTTACTTGAGCGTAAAGTTC  
TTGGCTACATGCAACTCCGAAAAGGACCAAATGTCGTAGGACCCTACGGCCTTCTTC  
AACCCATCGCCGACGGCATTAAGCTATTTATTAAGAGCCCGTACGACCCTCCACCG  
CTTCTCCCGTTCTCTTTATTCTTGCTCCCATGCTCGCACTCACTCTAGCTCTTGCACTT  
TGAGCCCCCATACTCTCCCACACCCTATGACTGACCTCAACCTCGGCATCTTATTTG  
TTTTAGCATTGTCCAGCCTTGCAGTTTACTCCATCTTGGGGTCAGGCTGAGCATCAA  
ACTCAAAGTATGCACTCATCGGGGCCCTCCGAGCTGTTGCACAACTATTTCTACG  
AGGTCAGCCTAGGCCTCATTTTACTTAATATTATTATTTTTTCCGGTAGCTTCACTCT  
TCAAACCTTTAACACAACCCAAGAAGCCATCTGACTAATTGTTCTGCTTGACCTTT  
AGCTGCCATGTGATATGTTTCTACCCTGGCTGAGACAAACCGGGCACCTTTTGACCT  
AACAGAGGGCGAATCTGAACTTGTTTCCGGATTTAATGTAGAGTATGCAGGCGGAC  
CCTTCGCTTTGTTTTTCTGGCTGAATACTCTAATATCCTTCTGATGAATACCCTATCT  
GCAGTATTGTTCTTGGGGGCTTCTCATATCCCGACCATGCCAGAATTGACAAGCATT  
AATCTTATAACCAAAGCCGCTCTTCTCTCAGTAGTGTTCTGTGGGTTTCGAGCCTCAT  
ACCCTCGATTTTCGTTATGACCAACTTATACACCTTACCTGAAAAAGCTTCTTCCCCT  
CACACTCGCATTAGTTATTTGACATTTGGCCCTCCCTATTGCATTTGCGGGCCTTCCA  
CCACAATTGTAGATGAATCCTTACATCTTAACCACTCTTCTATTTGGCTTAGGCCTTG  
GCACAACACTTACATTTGCAAGCTCCCCTGACTCCTTGCTTGAATGGGCCTTGAAA  
TTAATACTCTCGCTATCCTCCCCCTTATAGCCCAACACTACCACCCTCGAGCAGTTGA  
AGCCACCACTAAATATTTCTCACACAAGCTGCAGCAGCCGCTACCCTTCTTTTTGC  
AACTATAACTAACGCTTGACTTACGGGCCAATGGGATATTCAACAAATGACTCACCC  
CCTCCCAACAACAATAATTATTGTTGCTCTAGCACTAAAAATTGGCCTTGCAACAGT  
ACACTCCTGACTACCAGAAGTTCTTCAAGGCCTAGACCTCACCACTGGACTAATCCT  
CTCTACTTGGCAAAAACTTGCCCCCTTTGCTCTTCTCATGCAAATTCAAACCACAACC  
CCACCCCACTTATTATTATGGGCTTGCTTTCTACCTTGGTGGGAGGCTGAGGCGGGC  
TAAACCAAACCTCAACTACGCAAAATTCTTGCTTACTCCTCAATTGCCACCTTGCT  
GAATAGTCTTAATTCTCCAGTTCTCACCTACCCTTACCCTCCTCACACTTCTCACATA  
TATCCTATAACTCTATCAATATTTTTAGTTTTTCAAGATAAATAAAGCCACCACCTTA  
ATGCCCTTGCTATCTCCTGATCTAAAACCCAGCCCTTACAGCGCTAACCCCTCTTAT  
CCTGCTCTCTCTTGGCGGCTTACCCCTCTCACGGGCTTTATACCAAATGACTTATT  
CTTCAGGAGTTTACCAAGCAAGATTTACCTTTCTTGCCACCCTCGCCGCACTTACTGC  
TCTCCTCAGCCTCTACTTCTACTTGCGCCTCTCCTATGCCATAACACTCACCATGTTT  
CCTAATAATCTTGAGGTGCAACCCCTGGCGACTCCACAACCTCTCAGCTTACCCTC  
CCTCTCGCCACAACCTACCACAGCAACTATCCTTCTTCTTCCATTAGCCCCCGCTGCTT  
TAGCACTACTCACCACTATGAACCTTCTCCTAACTATCGTTACAATCACAGCTCTTC  
TGTCTATAATTCTCATAATTGTCTCTTTTTGGCTCCCCCAAATGACACCCGATTATGA  
AAAACTTTACCATACGAATGCGGCTTTGACCCCGTAGGTTGCGCCCGATTACCTTT  
TTCAGTGCGATTTTTTCTGATCGCCATCCTCTTTCTTCTTTGATCTAGAAATTGCTC  
TCCTTCTTCTCTCCCCTGAGGGGACCAACTAACATCGCCGTTGTAAACATTTCTGTG  
AGCCACAGGCGTCCTTTCCCTCCTGACCCTTGGCCTCGTGTACGAATGAATTCAAGG  
GGGCCTAGAGTGGGCTGAGTATGCTAATAATCTTGATCCCAACACTGATGCTAATCC  
CAACAGCTTGACTAACCAAACCAACTTGGTTATGACCAACAACCTTTAACACATAGCT  
TTTGCATCTCCTTAGTTAGCTTGTTATGATTAATAAACATCTCAGAGACCGGGTGAT  
CCTCACTCAACTCATGAATAGCTACCGACCCACTATCAACACCCCTGCTCGTTCTCA  
CATGTTGGCTGCTGCCCTTAATAATCCTAGCAAGCCAAAACCACACCCTCAGAAC

CAGTTAACCGCCAACGTATATACATCACACTTCTAACCTCCTCCAATTCTTTCTCATC  
CTAGCATTTTAGCGCGACTGAACTAATTATATTTTATGTCATGTTTGAAGCTACCTCA  
TCCCCACTTTAATTATTATTACACGCTGAGGAAACCAAACAGAGCGTTTAAACGCAG  
GCACCTACTTCCTCTTCTACACACTAGCGGGCTCATTACCCCTTCTTGTCGCCCTTCT  
CCTATTGCAAAACACAACAGGTACCTTATCACTTCTAACCCCTCCACTACGCGGACCC  
TTACAATGATGTCGCACGCAGACAACTCTGATGAGTAGGCTGCCTCCTCGCCTTCC  
TAGTTAAAATACCTCTTTATGGAGTACACCTTTGACTCCCCAAAGCACACGTTGAGG  
CCCCCATTCGAGGCTCAATAATTCTTGACGCCGTCTCCTTAAATTAGGAGGGTATG  
GAATAATTCGTGTAATACCAACCCTGGAACCCCTAACCAAGGAAGTATCCCT  
TTATTATCTTTGCACTCTGGGGTGTATTATAACTGGCTCCATTTGCCTCCGCCAAAC  
CGATCTCAAGTCACTAATTGCCTACTCATCTGTTAGTCACATAGGCCTTGTGGCAGG  
AGGAATCCTCATCCAATCACCTTGGGGCCTTACAGGTGCACTTACCCTTATAATTGC  
CCACGGCCTGACTTCCTCCGCCCTCTTCTGCCTAGCGAATACTAATTATGAACGAAC  
CCACAGCCGGACAATGGTCCTAGCACGCGGCCTTCAAATAGCACTTCCTTTAATAGC  
AACTTGATGGTTTATTGCCAGCCTAGCTAATCTAGCCCTCCACCTTTACCCAATCTT  
ATAGGAGAACTAATAATTATTACCTCTTTATTTAACTGATCTTGATGGACTCTAGCA  
CTTACAGGGGGCCGGCACCTTAATTACAGCTGCTTATTCCCTCTACATATTCCTAATAA  
CCCAGCGAGGGCCCCCTCCCAACACATATTATAGCACTTAGCCCCCTCACATACCCGAG  
AACATCTTCTCGTTGCCTTCACCTCGCCCCCTTGGCCCTATTAATTCTCAAACCCGAG  
CTGATCTGACGCTGAACTGCTTATGACCCCTACACATTTTGCCTTTTCCTCAGCCTTT  
ATTTTAGGCTTAACAGGCCTGGCATTCCACCGGTCTCATCTACTATCTGCTCTTTTAT  
GCCTTGAGGCAATAATACTATCTCTATTTGTTGCCCTTTCCTATGAACACTTCAACT  
AGATTCCACCAATTTCTCAACGTCACCCATGCTTCTACTCGCATTTTTCAGCCTGCGAG  
GCAGGTGCTGGTCTAGCCCTACTAGTTGCTACTGCCCCGACCCATGGGACCGATCGC  
CTACAAAGCCTAACTTACTACAATGCTAAATGCAGCCTACTTCTCTAATGATCTCA  
TCAAGTTTAGTTACCATTTTATGCTGTTAAGCTACCCGTTACTTACTGCACTCCTTC  
CTACTCCTCGAGGTTCCGATTGATCCACCTCTCACGTCAAAACAGCAGTAAAGATAG  
CCTTTTTTGTAGCCTTCTCCCCCTAGCCCTCTTTTTAAATGAAGGCGCGGAAACAAT  
CGTTACAAATTGGACATGAATAAATACTCACTCCTTCGATATTAGTATCAGTCTAAA  
ATTCGACTTTTACTCAATTATTTTCACACCCATCGCCCTCTATGTAACATGATCCATC  
CTAGAATTTGCATCCTGGTACATGCACTCTGACCCCTACATAAGCCGTTTCTTTAAAT  
ACCTCCTTACCTTCCTGATTGCTATAATTATTTTAGTAACCGCAAACAACATATTTCA  
ACTTTTTATTGGCTGAGAAGGCGTAGGCATTATATCGTTCCTCCTTATCGGGTGATG  
GTATGGTCGGACAGATGCCAACACTGCAGCCCTCCAAGCTGTTCTCTACAACCGGGT  
AGGGGACATCGGACTTATCTTCGCCATGGCTTGAATGGCAACAACTTAAATTTCCTG  
GGAAATACAGCAAGTGTTTCGCAAGCTCCAAGACATAGACTTGACTTACCCCTCCT  
CGGGCTAATCATTGCAGCCACCGGGAAATCAGCCCAATTTGGGCTCCACCCTTGGCT  
GCCGTCCGCCATGGAGGGCCCCACACCGGTGTCTGCCCTACTTCACTCCAGCACTAT  
GGTCGTTGCCGGTATCTTCTTACTGGTGCGAATGAGCCCTCTTCTAGAAAATAACCC  
TACCGCTCTTACAGTCTGCCTGTGCCTCGGAGCCCTAACTACCCTCTTTACCGCCACA  
TGTGCTTTAACCCAAAACGACATTAAAAAAATCGTTGCATTCTCCACATCAAGCCAA  
CTTGGGTAAATAATGGTTACCATCGGCCTAAACCAACCACAGTTAGCATTCCTTCAT  
ATTTGCACACACGCCTTTTTTAAAGCCATATTATTCTTGTGTTCCGGGTCTATTATTC  
ACAGCCTAAACGACGAGCAGGACATCCGAAAAATGGGAGGTATACATCACCTTACG  
CCCTTTACATCTTCATGCCTGACTATCGGGAGCCTCGCCCTTACAGGTACGCCTTTCC  
TAGCCGGCTTCTTCTCAAAGACGCCATTATCGAAGCACTAAACACATCCCACCTAA  
ACGCCTGAGCCCTCACCTCACTCTCCTAGCCACCTCTTTCACAGCAATCTACAGCTT  
TCGAGTAGTATTTTTTGTTCCTCATGGGTCATCCACGGTTTAACTCCTTTCCCCCATTA

ATGAAAATAACCCAGCAGTAATCAACCCACTTAAACGCTTAGCCTGGGGAAGTATT  
CTTGCAGGACTGCTTATTACCTCAAATATTACACCTCTAAAAACCCCATTTATGTCA  
ATACCCCTAACCCTTAAATTGGCTGCTCTTATGGTTACAATTGTTGGGCTTCTTATTG  
CCCTGGAACCTCGCCGCACTAACCAATAAACAAATTTAAAGCAACACCCATTCTTACAC  
ACATAACTTCTCAAATATGCTTGGCTTCTTCCCAGCTATTGTTCAACCGCTTAACCCCT  
AAGCTAGCCCTCACCTTGGCCAAGGTATTGCCAGTCAAATAATAGACCAAACCTG  
ACTAGAAAAGACGGGCCCTAAAGCCATCACATCTCTAAGCCTCCCCATGGTTACCAT  
AACAAAGCAACATCCAACAAGGCATGATTAACCATATCTTTTCTTTTATTCTAACT  
CTTGCCCTTATAGTTGCCATACTATTTGTTTAATGACCTTTATTATATATTTAATTCTA  
TTCTGTTTTGTACTAGGTTTAGTCGCGGTTGCTTCTAACCCTTCTCCTTACTTTGCTGC  
CTTAGGGTTAGTTGTGGTAGCTGGGATGGGGTGTGGAATATTAGTTGGGTGTGGAGG  
GCCCTTTTTATCGCTAGTGCTTTTTTTAATTTATTTGGGAGGGATATTAGTTGTATTTG  
CATATTCAGCAGCGTTGGCTGCTGAGCCGTACCCTGAAAGCTGAGGAAATCGGGAA  
GTTTTAACTTATGGTACTTTATGCGGGTGGGGTGTGTAAATTTCTGCGTTGTTTTGAG  
GGGGGTGGTATGAGTCGTCTGGGTGCTAGTAGATAACTTCAATGAGTTTTCTGTGT  
TCCGTGGGGATATGGGCGGTGTTGCTGTAATACTCTTCTGGGGGTGAATGTTAA  
TTATTAGTGCGTGGGTCTCTTTCTAACTCTGTTTGTGGTTCTAGAATTAACCGGGGT  
ATAAGTCGAGGGACCTCCGACTGTCT"/>

<sequence id="seq\_Pseudopleuronectes\_herzensteini\_MW7130611"  
spec="Sequence" taxon="Pseudopleuronectes\_herzensteini\_MW713061" totalcount="4"  
value="ATGATACTAAGCTTCTTTGACCAATTTATGTCCCCCGTATTCCTGGGCATCCC  
ACTAATTGCACTAGCAATTACACTGCCTTGAACGCTCTTTCCAGCCCCCGTATTCGCT  
GACTAAACAACCGCCTAATCTCGCTCCAAGGGTGATTTATTAGCGGCTTTACCTCAC  
AACTTCTTCTTCCCCTAAATCCCAGGAGGCCACAAATGAGCACTTCTATTGCGCTCGCT  
AATCTTTTCTCTTTCTATTAACATGCTTGGCCTCCTTCCGTACACATTTACACCTACC  
ACTCAACTCTCGCTTAACCTCGGCCTTGCGGTCCCACTCTGGCTGGCAACTGTCATC  
ATGGTATGCGAAACCAACCAACAATCGCCTTAGGCCACCTTCTTCCAGAAGGGACTC  
CTACCCTCCTGATCCCCGTACTAATTATTATCGAAACAATTAGCCTATTTATTTCGACC  
CCTTGCTCTGGGGGTCCGACTTACAGCTAACCTCACAGCGGGGCCACCTCCTCATCCA  
ACTCATTGCAACAGCTGCCTTCGTTCTTCTCCCGCTTATACCTGTTGTTGCTATTTTA  
ACAACAACGGTTCTCTTCCCTCCTCACTCTTCTCGAAGTTGCCGTTGCTATAATTCAAG  
CCTATGTCTTTGTCCTACTTCTAAGTCTTTACCTACAAGAAAACGTTTAATGCCTCAA  
CTGAACCCCGCACCTGATTTGCAATTTTGGTTTTCTCTTGAATAATCCTTTTAACTG  
TCATTCCCCCAAAGTTTTAGCTCACACTTACCCCAATGAGCCAACCTCCCAAAGCA  
CACAAAAACAAAACAGAACCCTGAAACTGACCATGATACTAAGTGGCAATCACACG  
TTGATTTTTCTCGACCAATCACAAAGACATCGGCACCCTCTATCTTGTATTTGGTGCC  
TGAGCCGGAATAGTGGGGACAGGCCTAAGTCTGCTCATTGAGCAGAGCTAAGCCA  
ACCTGGGGCTCTCCTGGGAGACGACCAAATTTATAACGTAATCGTCACCGCACACGC  
CTTTGTAATAATCTTCTTTATAGTAATACCAATTATGATCGGAGGGTTTCGGAACTG  
ACTTATTCCATTAATAATTGGGGCCCCCGATATGGCCTTCCCTCGAATAAATAACAT  
GAGCTTCTGACTTCTACCCCATCCTTTCTCCTTCTTCTAGCCTCTTCAGGCGTCGAA  
GCCGGGGCGGGGACAGGATGAACCGTGTACCCCCCACTAGCTGGAAATCTAGCACA  
CGCCGGAGCATCCGTAGACCTACCATTTTCTCTCTTCATCTTGCCGGAATTTCTTCA  
ATTCTAGGGGCAATCAACTTTATTACCACTATCATCAATATGAAACCAACAGCAGTC  
ACTATGTACCAAATCCCCTATTTGTCTGGGCCGTACTAATCACCGCCGTCTTCTTC  
TTCTTTCCCTACCCGTTCTGGCCGCTGGCATCACAAATGCTACTGACAGACCGCAACC  
TAAACACAACCTTCTTTGACCCTGCCGGAGGGGGTGACCCCATCCTTTACCAACACC  
TATTCTGGTTCTTTGGCCATCCAGAAGTCTACATTTTAATTCTCCAGGCTTCGGGAT

GATTTCTCACATTGTTGCATACTATGCAGGTAAGAAAGAACCCTTTGGCTACATGGG  
GATGGTCTGAGCTATAATGGCTATCGGACTCCTGGGCTTCATTGTATGGGCCCATCA  
CATGTTTCACAGTCGGAATAGATGTGGACACACGGGCCTATTTTACCTCTGCCACAAT  
AATTATTGCCATCCCAACCGGCGTAAAAGTCTTTAGCTGACTCGCAACCCTTCATGG  
AGGAAGCATTAAATGAGAAACCCCACTCCTGTGGGGCCCTAGGCTTTATTTTCCTATT  
CACAGTGGGGGGTCTTACTGGTATTGTCTTAGCTAACTCGTCTCTTGACATTGTCCTT  
CATGACACATACTATGTAGTAGCCCACTTCCATTATGTCTTATCTATGGGGGGCTGTCT  
TTGCGATCGTTGCCGCCTTCGTACACTGATTCCCACTATTTACAGGCTATACCCTCCA  
CTCCACATGAACGAAAGTCCACTTTGGCCTAATGTTTGTGGGGGTCAACCTCACATT  
CTTCCCCCAACATTTTCTGGGTCTCGCCGGAATGCCTCGACGGTATTCAGACTACCC  
GGACGCATACACCCTTTGAAATACTGTCTCATCGATCGGCTCACTAATGTCGCTCGT  
CGCTGTGATTTTATTTTGTATTATTGAGAAGCATTACGGCCAAACGAGAAGTC  
GGCGCAGTAGAACTAACTTCAACTAACATTGAATGACTTTACGGCTGCCCTCCACCC  
TACCACACATTTGAGGAGCCCGCATTCGTTCAAGTTCGTATAAACTAAATGGCACAT  
CCATCACAACTGGGATTTGAGGACGCAGCTTCCCCCCTTATAGAAGAATACTTCAC  
TTCCATGACCACGCCTTAATAATTGTTATTCTCATCAGCACCATGGTACTTTATATTA  
TTGTGGCTATGGTCACGGCCCACTAACCGATAAGCTTGTGTTAGACTCTCAAGAAA  
TTGAAGTTATCTGAACAGTTCTCCAGCTATTATTCTTATTCTCATCGCCCTCCCATC  
TCTCCGAATTTTATACTTAATAGACGAAATTAACGACCCCCACCTGACAATTAAAGC  
CTTAGGACACCAATGATACTGAAGCTACGAATACACAGACTACCAGGACCTCGGTT  
TTGACTCTTACATGGTCCCACTCAAGACCTAACCCCGGGCAATTCCGACTACTAG  
AAGCAGACCACCGAATGGTAATTCCTGTAGAATCTCCAATTCGAGTTCTTATCTCAG  
CTGAGGATGTCTTGCACTCATGAGCAGTCCCCTCCCTGGGTGTAAAAGTAGACGCCG  
TGCCTGGACGATTAAACCAGGCAACCTTTATTGTTAGCCGACCCGGCGTATTCTATG  
GCCAATGCTCTGAAATTTGCGGGGCAAACCACAGCTTTATGCCCATCGTTGTAGAGG  
CAGTACCACTTGACCACTTTGAGAAGTGGTCTTCGCTAATAATTGAAGACGCCTATG  
GCCCCTCAAGCACACCCGTACCACATAGTCGACCCGAGCCCATGACCCCTCACGGG  
GGCTATTGCTGCCCTATTGATAACATCTGGCCTTGCTATCTGATTCCACTTTCCTCC  
ACAACCCTAATAACTATTGGAACCATCCTTCTCATTCTAACAGTCTTTCAATGATGA  
CGAGACGTCGTCCGAGAAGGAACATTTCAAGGACACCACACCCCTCCCGTTCAAAA  
AGGCCTCCGATACGGAATAATCCTATTTATTACATCAGAAGTCCTATTTTTCTAGG  
CTTCTTCTGAGCCTTTTACCCTCAAGCCTAGCACCCACCCCGACCTAGGAGGCTT  
CTGACCACCGGCAGGCATCACACCTTTAGACCCATTCGAAGTCCCACTTCTAAACAC  
AGCAGTACTGCTTGCCCTCCGGCGTAACTGTCACATGGGCACATCACAGCATCATAGA  
AGGTAAACGAAAACAAGCTATTCAGTCTCTCGCTTTAACAATCTTGCTCGGAGGGTA  
TTTCACCTTCCTCCAAGGCCTTGAGTATCACGAAGCCCCCTTACCATCGCAGACGG  
GGTTTACGGTGCCACATTCTTTGTTGCCACCGGCTTCCACGGACTTCACGTCTTAGTT  
GGTTCATCTTTCTTAGCCGTTTGTCTACTACGCCAAATTCTCCACCATTTTACATCAG  
ACCACCACTTTGGATTTGAAGCAGCCGCATGATACTGACACTTCGTAGACGTCGTCT  
GACTCTTCCTCTATATCTCTATTTACTGATGAGGATCTTAATGGCCAATCTCCGTAAA  
TCCCACCCCTTCTTAAAATCGCAAACGATGCTTTAGTCGACCTCCCAGCCCCCTCC  
AACATTTCTGTCTGATGAAACTTTGGGTCTCTTTTAGGACTCTGCTTAGTAACCCAGA  
TCGCTACCGGCTTATTTTTAGCCATACACTACACATCAGATATTGCTACTGCCTTCAC  
CTCCGTTGCCCACATCTGCCGGGACGTCAACTACGGCTGACTTATCCGAAGCATTCA  
TGCCAATGGCGCATCATTCTTTTTTATTGTATCTACCTTCACATCGGTCGGGGTCTC  
TACTACGGCTCCTACCTCTACAAGGAAACATGAACTATTGGAGTCGTACTGCTACTC  
CTCGTAATGATAACCGCTTTCGTGCGATACGTTCTCCCTTGAGGACAGATGTCGTTTT  
GAGGTGCAACCGTCATTACCAACCTACTATCTGCCGTCCCTTATGTTGGGGGCACCC

TTGTTCAATGGATTTGAGGTGGTTTTTCTGTAGACAATGCCACCCTCACCCGGTTCTT  
TGCATTCCACTTCCTCTTCCCGTTCAATTATCGCAGCCGCAACAGTTATTCACCTTCTT  
TTTCTCCACGAAACTGGTTCAAACAACCCCAACGGCTTAAACTCGGACTCCGATAAA  
GTCCCATTCCACCCCTACTTCACATACAAAGACCTCTTGGCTTCGCGGTCCTTCTGAC  
TGCACTAGCCTCGCTCGCTCTGTTTTCCCCGAACCTTTTGGGAGACCCAGACAACCTT  
ACCCCCGCAAACCCCTTGTACACCCCTCACATCAAGCCAGAGTGATATTCCTC  
TTTGCCTACGCCATTCTCCGCTCCATTCCAAACAAGCTTGGTGGTGTACTTGCCCTTC  
TATTCTCCATCCTAGTTCTTATGCTCGTTCCCTTTCTCCACACATCTAAGCAACGAAG  
CTTGATGTTTCGTCCTGTGACACAATTCCTGTTCTGGTCTTTAGTAGCCGACGTAATA  
ATTCTGACTTGAATTGGAGGAATACCCGTTGAACACCCCTTCGTAATCATTGGCCAA  
GTAGCATCCCTCATCTACTTCTCCCTTTTCCTGGTCCTAATCCCTACAGCAGGCTGAA  
TGGAAAACAAAGTCCTTGGATGAAAATATGATTTCAACCCTCATTACGCATATTATT  
AACCCACTAGCCTTTATTGTACCCGTTTTGCTAGCCGTAGCATTCCCTACCCCTCCTTG  
AACGAAAAGTGCTAGGCTATATACAACCTCCGAAAAGGGCCTAACATCGTAGGGCCT  
TACGGCCTCCTTCAACCCATTGCTGACGGGGTAAACTGTTTATCAAAGAACCCGTC  
CGCCCTTCAACCGCCTCGCCTGTTCTGTTCTCGTAGCCCCCATGCTCGCACTCACCT  
TAGCCCTTACACTTTGAGCCCCCATACCTTTTCCCTACCCTGTTGTTGACCTCAACCT  
AGGTATCTTGTTTCATCCTGGCACTATCTAGCCTTGCGGTTTTATTCCATCCTCGGATCA  
GGATGAGCCTCCAATTCAAATATGCCCTGGTGGGTGCACTACGGGCTGTTGCCCAG  
ACGATTTCTTACGAGGTGAGCCTTGGACTCATTTTACTTAACATCATTATCTTTACAG  
GAGGCTTCACACTTCAGACCTTTAATACAGCCCAAGAGGCCATCTGACTGGTCGTGC  
CCGCCTGACCCCTAGCTGCCATGTGATACATTTCTACCCTTGCCGAAACAAACCGCG  
CGCCCTTCGATCTAACAGAAGGGGAATCTGAACTTGTCTCAGGCTTCAACGTAGAAT  
ATGCAGGGGGACCCCTTCGCTTTGTTCTTCTTAGCTGAATACTCCAACATTCTCCTGAT  
AAATGCCCTATCCGCAACACTATTTCTGGGCGCCTCCACATTCCGTCCATCCCAGA  
ATTAACCAGCATTAAATATTATAACGAAAGCAGCCCTTCTCTCAGTCGTCTTCCTCTG  
GGTTCGAGCCTCTTACCCACGATTCCGTTACGACCAACTCATAACCTCATTGAAA  
AAATTTCTTCCACTTACACTAGCCCTGGTTATTTGACACTTAGCGCTCCCTATCGCA  
TTCGCTGGTCTTCCACCACAACTATAAATGAACCCCTACATCTTGACCACCCTTCTAT  
TTGGTTTAGGCCTAGGTACAACACTCACATTTGCAAGCTCGCACTGACTTCTCGCTT  
GAATGGGCCTCGAAATCAATACACTGGCCATTATTCCACTAATAGCCCAACATCACC  
ACCCACGGGCAGTTGAAGCAACTACTAAATACTTCCTAGCACAAGCCACAGCGGCC  
GCCACGCTCCTGTTTGCAAGCACAACCAACGCTTGACTTACCGGCCAGTGGGATATC  
CAACAAATAACACACCCGCTCCCCACAACAATAATTGTCATTGCCCTAGCACTAAAA  
ATTGGACTIONGACCAATGCACTCTTGACTCCCCGAGGTTCTTCAGGGCCTAGATCTT  
ACCACCGGGTTAATTCTATCCACATGACAGAAGCTTGCCCCCTTTGCTCTCTTACTAC  
AAATTCAAACAACAACCCTACCCCCCTAATCATTATCGGCTTACTTTCTGCCCTTGTC  
GGTGGGTGAGGCGGCCTCAACCAAACACAACCTGCGTAAAGTCCTTGCCCTACTCCTCA  
ATTGCTCACCTTGGGTGAATAATACTGATCCTTCAATTTTCACCATTGCTGAGCCTCC  
TCGCACTCCTCACATACTTCCCATGACCTTTTCAGCATTCTCATCTTCAAAGTGAAC  
AAAGCCACCACTGTTAATGCACTCGCGATCTCCTGAGCAAAAACCCCCGCCCTCACA  
GCCCTCGCCCCCTTGTATTACTTTCCCTCGGCGGCCTTCCGCCGCTTACCGGCTTCA  
TACCCAAATGATTCATTCTCCAAGAGCTCACTAAACAAGATCTCCCACCCTCGCCAC  
AGTTGCTGCATTAACAGCCCTATTAAGCCTTTACTTCTACCTTCGTCTCTCGTATGCA  
ATAACCCTAACGATATTCCCTAATAACCTCGTTGGTGTAGCCCCCTGACGATTCTATT  
CCCCCAATTTACCCTCCCCCTAGCCGTCTCTACCACAGCAACCACCCTTCTTCTGCC  
GCTTGCCCCCTGCTGCTGTGGCACTCCTCATCACCTATGAGCCTTCTTCTAACCATCAT  
TTCAATTACCGCCCTCCTCTCAACGGTACTTGCCATTGTGTCTTTTTGACTCCCCCA

ATCACACCAGACCACGAGAACTATCACCATACGAATGTGGCTTCGACCCCATAGG  
TTCCGCCCCGATTACCTTTCTCGCTGCGATTTTTTCTCATTGCAATCCTTTTTCTTCTCT  
TCGACTTAGAAATTGCACTTCTTCTCCCCCTCCCATGAGGGGACCAACTAGCATCCC  
CTCTGCTTACATTACCTGAGCTACAGCTGTTCTATCCCTTCTAACCCCTCGGCCTCAT  
TTACGAATGAATGCAGGGAGGCCTTGAATGGGCTGAATATGCTAAAAATTCTAATC  
CCAACACTCATGCTAATCCCAACAGCCTGACTACTCAAACCTAGCTGGCTGTGGCCC  
ATAACTTTGTTATATAGCTTTTGTATCTCCCTGATTAGCCTTTCGTGATTAAAAAATC  
TCTCGGAAACCGGCTGATCCTCACTCAACCTATTTATAGCTACCGACGCCCTGTCAA  
CACCCCTCCTAGTTCTTACATGCTGGCTCCTCCCACTAATGATCTTGGCAAGCCAGA  
AACATACAGCCTCAGAACCCTGGGTCGGCAACGTATGTACATCACACTTCTCGCCT  
CCTTCAGTTTTTTCTGATTCTAGCATTTAGCGCCACTGAACTCGTAATATTCTACGTA  
ATATTTGAAGCAACCCTGATCCCCACACTTATTATTATTACCCGCTGAGGTAACCAA  
ACAGAACGCCTAAATGCAGGGACCTACTTCCTCTTCTATACACTAGCAGGTTCACTC  
CCTCTTCTTGTGTCCTGCTCTTGCTCCAAAACACATCAGGGACCCTCTCACTATTGA  
CCCTCCATTACGGGGATCCTCTAACTATCAACTTATGCAGACAAATTATGGTGAGCA  
GGCTGCCTTCTAGCCTTCTGGTTAAAATGCCACTTTACGGTGTTACCTATGACTTC  
CTAAAGCACACGTCGAAGCCCCAATTGCAGGCTCAATAATCCTTGACGACGTTCTCC  
TTAAACTAGGGGGTTACGGCATAATCCGCATGATAACAATGCTTGAGCCTCTAACTA  
AGGAACTAAGCTACCCCTTCATTGTCTTTGCACTTTGGGGTGTAATTATAACTGGTTC  
AATTTGTCTACGCCAAACAGACCTTAAATCTCTAATTGCCTATTCATCTGTAAGTCAC  
ATGGGCCTGGTAGCCGGGGGAATTCTCATCCAATCTCCTTGAGGACTCACGGGGGC  
ACTTACACTTATAATTGCTCATGGTCTGACCTCCTCAGCCCTGTTCTGCCTAGCAAAC  
ACAAACTATGAGCGGACTCACAGCCGTACAATAGTCCTGGCACGAGGGCTTCAAGT  
GGCACTACCCCTGATGGCCACTTGATGATTTATCTCCAGCCTAGCCAACCTGGCCTT  
GCCACCACTACCCAACCTTATGGGAGAACTAATGATTATTACTTCTCTTTTTAACTGA  
TCCTGGTGAACCCTAGCATTAACGGGGTCCGGCACTCTTATTACAGCCGGTTACAGC  
CTCTACATATTCTTAATAACTCAACGAGGCCCTCCCAACGCACGTAATTGCACTC  
GAACCATCACACACCCGAGAACACCTTCTTATTGCCTTCATCTTATTCTCTCATTCT  
CCTTGTGCTTAAGCCCGAGCTGATCTGAGGTTGGACTGCCTATGACCCCCACACACT  
TTGCCTTCTCCTCAGCCTTTTTTCTAGGTTTAAACAGGCCTGGCATTCCACCGGTTCCA  
CCTCCTCTCCGCCCTATTGTGCCTTGAAGGGATAATACTATCTCTATTTGTTGCCCTC  
TCCTTGTGAACACTCCAACCTAGACTCAACTAACTTTTCAGCATCTCCTATGCTCCTCC  
TTGCATTTTCAGCCTGCGAAGCAAGCGCCGGGCTCGCTCTTCTGGTCGCCACTGCCC  
GAACCCACGGAAGTGAACGACTACAAAGCCTAAATCTCCTCCAATGCTAAATGCAC  
CCCACCTCCCTAATGATCTCATCAAGCTTGGTTACAATCTTTGCATTACTAGCCTACC  
CTCTGATCACCACGATTTCGTCCACACCCCGAGGGCCTCAATGAGCAACATCTCATG  
TCAAGACAGCTGTAAAAATAGCTTTCTTTGTCAGCCTCTTACCCCTCGCCCTATTCT  
AAACGAGGGTGCCGAGACAATCGTCACTAATTGAACCTGGATAAACACTAATACCT  
TTGACATCAACATTAGCCTAAAATTTGACTTTTATTTCGATTATTTTTACACCCATCGC  
CCTCTATGTTACTTGATCCATTCTGGAATTTGCATCATGGTACATGCACGCCGATCCA  
AACGTGAACCGCTTTTTTAAGTATCTTCTGACATTTTTTAATTGCCATAATCATTCTAG  
TAACCGCAAACAACATGTTTCAACTCTTTATTGGTTGAGAAGGCGTCGGGATCATGT  
CATTCTCCTCATCGGCTGGTGATACGGACGGGGCGACGCTAACACTGCGGCACTTC  
AAGCGGTTCTGTATAACCGGGTCGGGGACATCGGACTTATCTTCGCCATAGCTTGAA  
TAGCAACAAACCTGAACTCCTGAGAAATACAACAAATTTTTGCAACTTCCAAAGAC  
ATAGACTTAACCTACCCCTCCTCGGACTAATCGTTGCAGCAACTGGGAAATCAGCT  
CAGTTTGGACTTCACCCTTGACTCCCTCCGCTATGGAGGGTCCTACACCGGTATCT  
GCCCTACTTCATTCTAGCACTATGGTCGTCGCCGGCATTTCCTGCTAGTCCGGATGA



GTCCGCTCCTGGAAAATAACCCGACTGCCCTCACAACCTGTCTTTGCCTCGGGGCTC  
TCACGACACTATTTACTGCAACTTGTGCCCTTACCCAGAATGACATTAAAAAAATCG  
TCGCATTCTCTACATCCAGCCAGCTTGGACTCATGATGGTAACCATCGGACTAAACC  
AACCTCAACTAGCATTTTCTTCACATCTGTACACATGCCTTCTTTAAAGCCATGCTATT  
TCTCTGCTCGGGGTCTATTATTCATAGCCTAAACGACGAACAAGACATCCGAAAAAT  
AGGAGGGGATACACCACCTTGCACCTTTCACCTCATCTTGTCTAACAATTGGCAGCCT  
CGCACTTACGGGAACCCCCCTTCTTAGCCGGTTTCTTCTCCAAAGATGCCATCATCGA  
AGCATTAAACACATCCCACCTAAACGCCTGAGCCCTTACCCTTACCCTCCTGGCCAC  
ATCTTTTACAGCAATCTACAGCTTCCGAGTAATTTTCTTTGTGCCCATGGGCCATCCC  
CGATTTAGCCCATCTCCCCTATTAACGAAAACAACCCAGCAGTAATTAATCCGCTCA  
AACGACTAGCATGGGGCAGTATCATCGCAGGACTACTAATCACCTCAAATATCACA  
CCCCTAAAAACACCTGTTATGTCCATGCCGCCCTTCTGAACTAGCCGCCCTGGCA  
GTTACGATCGTAGGCCTACTGGTTGCCATAGAACTTGCCATACTAACCAACAAACAA  
TTTAAATCAACCCCCCATCTTAACGTACACAACCTTCTCCAACATACTAGGCTTCTTCCC  
TGCCATTGTGCACCGCCTGACCCCTAAGTTAGGGCTCGTTCTCGGCCAAGACATTGC  
CAACCAAATAGTAGACCAAACCTGACTAGAAAAAGCAGGCCCAAAGCCATTGTAT  
CCTCCAACCTCCCCCTAGTCTCTTCTACAAGTAATATTCAGCGAGGAATAATCAAGA  
CATACCTACTCTCTTCCTTTTAACACTAGCCCTTATAATCCCAACACTCATCCCCTAA  
TGACTTTTGTATATATTTAGTTTTATTTTCTCTTGTGTTGGGGTTGGTTGCAGTTGCT  
TCTAACCCGTCCCCCTACTTTGCTGCTTTAGGGTTGGTTGTGGTAGCTGGGATGGGGT  
GTGGTATTTTAGTCGGGCACGGGGGGCCCTTTTTGTGCTTAGTTCTCTTTCTAATTTA  
CTTAGGCGGGATACTAGTTGTATTTGCATACTCAGCAGCGTTAGCTGCTGAGCCGTA  
CCCGGAAAGCTGGGGTAGCTGGTCGGTAATAGTTTACGGTTGTTTATGTGGCAGGGG  
TAGTGTAGTCTCTGCGTTGTTCTGAGGGGGGTGATATGAATCGTCTTGGGTCTTGGT  
AGATGAGTTGGCGGAGTTTTCTGTGTTCCGAGGCGATATTGGAGGGGTAGCTTTAAT  
GTACTCTTCTGGGGGGTGATTGTTAATTATTAGTGCGTGGGTGTTACTTCTTACGTTG  
TTTGTGGTCCTTGAGTTAACCGCGGTTTAAGCCGAGGGGCGTTGCGACGTTTT"/>

<sequence id="seq\_Pseudopleuronectes\_yokohamae\_KT2244851"

spec="Sequence" taxon="Pseudopleuronectes\_yokohamae\_KT224485" totalcount="4"

value="ATGATACTAAGCTTCTTTGACCAATTTATGTCCCCCGTATTCCTGGGCATCCC  
ACTAATTGCACTAGCAATTACACTGCCTTGAACACTTTTCCCAGCCCCCGTATCCGTT  
GATTAAACAACCGCCTAATCTCCCTTCAAGGCTGGTTTATTAGCGGCTTTACCTCAC  
AACTCCTTCTTCCGCTAAACCCGGGAGGCCACAAATGAGCGCTTCTATTGCCTCGC  
TAATCTTTTCTTTTTCTATTAACATGCTCGGACTCCTTCCGTACACATTTACACCTACC  
ACCAACTCTCACTCAACCTCGGGCTTGCAGTCCCACTCTGATTGGCAACTGTCATC  
ATGGTATGCGGAACCAACCAACAATTGCTTTAGGCCACCTTCTTCCAGAAGGAACTC  
CTACCCTCCTGATCCCAGTACTAATTATCATCGAAACAATTAGCCTATTTATTCGACC  
CCTTGCTCTTGGTGTCCGACTTACAGCAAACCTCACAGCAGGCCATCTCCTCATTCA  
GCTCATTGCAACAGCTGCCTTCGTCCTTCTCCCGCTTATACCTGTTGTTGCTATTTTA  
ACAACAACGGTTCTTTTCTCCTCACTCTTCTGGAAGTTGCCGTTGCTATAATTCAAG  
CCTATGTCTTTGTTCTACTTCTAAGTCTTTACCTACAAGAAAACGTTTAATGCCTCAA  
CTAAACCCCGCACCCCTGATTTGCAATTTTGGTTTTCTCTTGAATAATCCTTTTAACTG  
TCATTCCCCCAAAGTTTTAGCTCACACTTACCCTAATGAGCCAACCTCCCAAAGCA  
CACAAAAACAAAACAGAACCCTGAACTGACCATGATACTAAGTGGCAATCACACG  
TTGATTTTTCTCGACCAATCACAAAGACATCGGCACCCTCTATCTTGTATTTGGTGCC  
TGAGCCGGAATAGTGGGAACAGGCCTAAGTCTGCTCATTGAGCAGAGCTAAGCCA  
ACCCGGGGCTCTCCTGGGAGACGACCAAATTTATAACGTAATCGTCACCGCACACG  
CCTTTGTAATAATCTTCTTTATAGTAATACCAATTATGATCGGAGGGTTGCGAAACT

GACTTATTCCATTAATAATTGGGGCCCCCGATATGGCCTTCCCTCGAATAAATAACA  
TGAGCTTCTGACTTCTACCCCGTCCTTTCTCCTCCTTCTAGCCTCTTCAGGCGTTGA  
AGCTGGGGCAGGAACAGGATGAACCGTGTATCCCCCACTAGCTGGAAATCTAGCAC  
ACGCCGGAGCATCAGTAGACCTCACCATTTTCTCACTTCACCTTGCCGGAATTTTCAT  
CAATTCTAGGGGCAATCAACTTTATTACTACCATCATCAACATGAAACCAACAGCAG  
TCACTATGTACCAAATCCCACTATTTGTCTGGGCGTACTAATCACCGCCGTTCTTCT  
TCTTCTTTCCCTACCCGTCCTGGCCGCTGGCATTACAATGCTGCTGACAGACCGCAA  
CCTAAACACAACCTTCTTTGACCCTGCCGGAGGGGGTGACCCCATCCTCTACCAACA  
CCTATTCTGGTTCTTTGGTCATCCAGAAGTTTACATTTTAATTCTTCCAGGCTTCGGG  
ATGATTTCTCACATTGTTGCATATTATGCAGGTAAGAAAGAACCCTTTGGTTACATA  
GGAATAGTCTGGGCTATGATGGCTATCGGACTCCTGGGATTCATTGTATGAGCCAC  
CACATGTTTACAGTCGGAATAGATGTGGACACACGAGCCTATTTTACCTCTGCCACA  
ATAATTATTGCCATTCCAACCGGCGTAAAAGTTTTTAGCTGACTCGCAACCCTTCAT  
GGAGGAAGCATTAAATGAGAAACCCCACTCCTGTGGGCCCTAGGCTTTATTTTCCTA  
TTTACAGTGGGAGGTCTTACTGGTATTGTCTTAGCTAACTCGTCTCTTGACATTGTGC  
TTCATGACACATACTATGTAGTAGCCCACTTCCACTATGTCTTATCTATGGGGGCTGT  
ATTTGCAATCGTTGCCGCTTTTCGTACACTGATTCCCCCTATTTACAGGCTATACTCTC  
CACTCCACATGAACAAAAATTCACTTTGGCCTAATGTTTGTAGGGGTAAACCTCACA  
TTCTTCCCCCAACATTTCTGCGGTCTCGCCGGAATGCCTCGGCGATATTCAGACTACC  
CGGACGCATACACCCTTTGAAATACTGTCTCATCGATCGGCTCACTAATGTCGCTCG  
TCGCTGTGATTTTATTTTGTATTATTGAGAAGCATTACGGCCAAACGAGAAGT  
CGGGGCAGTAGAACTAACTTCACTAATATTGAATGACTTTACGGCTGCCCTCCACC  
TTACCACACATTTGAGGAGCCCGCATTTCGTTCAAGTTCGTATAAAATAAATGGCACA  
TCCATCACAACCTGGGATTTAGGACGCAGCTTCCCCCTTATAGAAGAACTACTTCA  
CTTCCATGACCACGCCTTAATAATTGTCATTCTCATCAGCACAATGGTACTTTATATC  
ATTGTGGCAATGGTCACGGCCCACTAACCGATAAGCTTGTGTTAGACTCTCAAGAA  
ATTGAAGTTATCTGAACAGTTCTCCAGCTATTATTCTTATTCTCATCGCCCTCCCGT  
CTCTCCGAATTTTATACCTAATAGACGAAATTAATGATCCTCACCTGACAATTAAAG  
CCTTAGGTCACCAATGATACTGAAGCTACGAATACACAGACTACCAAGACCTCGGTT  
TTGACTCCTACATGGTCCCAACTCAAGACCTAACCCCGGACAATTCCGACTACTAG  
AAGCAGACCACCGAATGGTAATTCCTGTAGAATCTCCAATTCGGGTCTTATCTCAG  
CTGAAGATGTCTTGCAATTCATGAGCAGTCCCCTCCCTGGGCGTAAAAGTAGACGCCG  
TACCTGGACGATTAAACCAAGCAACCTTTATTGTTAGCCGACCCGGCGTATTCTATG  
GTCAATGCTCTGAAATTTGCGGGGCAAACCACAGCTTTATGCCCGTCGTTGTAGAGG  
CAGTCCCACTTGACCACTTTGAGAAGTGGTCTTCGCTAATAATTGAAGACGCCTATG  
GCCCCTCAAGCACACCCATAACCACATAGTCGACCCGAGCCCATGACCCCTCACGGG  
GGCTATTGCTGCCCTATTGATAACATCTGGCCTTGCTATCTGATTCCACTTTCACTCC  
ACAACCCTAATAACTATTGGAACAATCCTTCTCACTCTAACAGTCTTTCAATGATGA  
CGAGACGTCGTTTCGAGAAGGGACATTTCAAGGACACCACACCCCTCCCGTTCAAAA  
AGGCCTCCGGTACGGAATAATTCTATTTATTACATCAGAAGTCCTATTCTTCCTAGG  
CTTCTTCTGAGCCTTTTACCACTCAAGCCTAGCACCCACTCCCGACCTAGGGGGCTTT  
TGACCACCAGCAGGCATCACACCTTTAGACCCCTTCGAAGTCCCGCTTCTAAACACA  
GCAGTACTGCTTGCCCTCAGGCGTAACTGTTACATGGGCACATCACAGCATCATAGAA  
GGTAAACGAAAACAAGCTATTCAATCTCTCGCCCTAACAATCTTACTCGGGGGATAC  
TTCACCTTCCTCCAAGGCCTTGAGTACCACGAAGCCCCCTTCACCATCGCAGACGGG  
GTTTACGGTGCTACATTCTTTGTTGCCACCGGCTTCACGGACTTCACGTCTTAATTG  
GGTCATCTTTCCTAGCCGTTTGTCTACTACGCCAAATTCTCCACCACTTTACATCAGA  
CCACCACTTTGGGTTTGAAGCAGCCGCATGATACTGACACTTCGTAGACGTCGTCTG

ACTCTTCCTCTATATCTCTATTTACTGATGAGGATCTTAATGGCCAATCTCCGTAAT  
CTCACCCCTTCTTAAAATCGCAAACGATGCTTTAGTCGACCTCCCAGCCCCCTCGA  
ACATTTCTGTCTGATGAACTTTGGGTCTCTTTTAGGACTCTGCCTAGTGACCCAAAT  
CGCTACCGGCTTATTTTTAGCCATACACTACACATCGGATATTGCTACTGCCTTCACC  
TCCGTTGCACACATCTGCCGGGACGTCAACTACGGCTGACTTATCCGAAGCATCCAT  
GCCAATGGCGCATCATTCTTTTTTATCTGTATCTACCTTCACATCGGCCGGGTCTCT  
ACTACGGCTCCTACCTATACAAAGAAACATGAACCATCGGGGTCGTCTGTCTGCTCC  
TTGTAATGATAACCGCTTTCGTCTGGATACGTCCTCCCTTGAGGACAAATGTCATTTTG  
AGGTGCAACCGTCATTACCAACCTACTATCTGCAGTACCTTATGTTGGAGGTACTCT  
TGTCCAGTGAATTTGAGGTGGCTTTTCTGTAGATAATGCCACCCTCACTCGGTTCTTT  
GCGTTCCACTTCCTCTTCCCTTTCATTATCGCAGCCGCAACAGTTATTCATCTTCTTTT  
TCTCCACGAACTGGTTCAAACAATCCTACCGGCCTGAACTCGGATTCCGACAAAGT  
CCCCTTCCACCCCTACTTTACGTACAAAGATCTCTTGGCTTCGCAGTTCTTCTGACTG  
CACTGGCCTCCCTCGCCCTATTTTCCCCAAATCTTTTAGGAGACCCGGACAATTTTAC  
CCCCGCAAACCCGCTTGTTACACCTCCTCACATCAAGCCAGAATGATACTTCCTCTTT  
GCTTACGCCATTCTCCGCTCCATTCCAAACAAGCTTGGGGGCGTACTTGCCCTTCTAT  
TCTCGATTCTGGTTCTTATGCTCGTTCCCTTTCTCCACACATCTAAACAACGAAGCTT  
AATGTTTCGTCTCTGTAACACAATTCCTGTTCTGATCTTTAGTAGCTGACGTAATAATT  
CTGACTTGAATTGGAGGAATACCCGTAGAACACCCTTTCGTTATCATTGGACAAGTA  
GCATCCCTCATCTACTTCTCCCTTTTCCTGGTCCTAATCCCAACAGCAGGCTGAATGG  
AAAACAAAGTCCTTGGATGAAAATATGATTTCAACCCTCATTACGCATATTATTAAT  
CCACTAGCCTTTATTGTACCCGTTTTGCTAGCCGTAGCATTCCCTTACCCTCCTTGAAC  
GAAAAGTGCTAGGCTATATACAACCTCCGAAAAGGGCCTAACATCGTAGGGCCTTAC  
GGCCTTCTTCAACCCATTGCTGACGGGGTGAACTATTTATCAAGGAACCCGTTTCGC  
CCTTCAACCGCCTCGCCTGTTCTGTTCCCTCCTAGCCCCATACTCGCACTCACCTTGG  
CCCTGACCCTTTGAGCCCCCATGCCTTTTCCCTACCCCGTTATTGACCTTAACCTGGG  
TATCTTATTCATCCTGGCACTGTCTAGTCTTGCAGTTTATTCCATCCTTGGGTCAGGA  
TGAGCATCCAATTCAAAATATGCCCTAGTGGGTGCACTACGAGCTGTTGCCCAAACG  
ATCTCTTACGAAGTGAGCCTTGGGCTCATTTTACTCAACATCATTATCTTTACAGGAG  
GCTTCACGCTTCAGACCTTTAACACAGCCCAAGAAGCCATCTGACTGGTTGTGCCTG  
CCTGACCCTAGCTGCCATGTGATACATTTCCACCCTTGCCGAAACAAACCGTGCAC  
CCTTCGACCTAACAGAGGGGGAGTCTGAACTTGTCTCAGGCTTTAACGTAGAATATG  
CAGGAGGCCCTTCGCTTTATTCTTTTTAGCTGAATACTCAAACATTCTCCTAATGAA  
TGCTCTATCCGCAACACTATTTCTGGGCGCCTCTCACATTCCGTCTATCCCAGAATTA  
ACCAGCATTAATATTATACTAAAGCAGCTCTTCTCTCAGTTGTCTTTCTCTGGGTTT  
GAGCCTCATATCCACGGTTCCGTTACGACCAACTCATAACCTCATTTGAAAAAATT  
TCCTCCCATAACACTAGCCCTGGTTATTTGACACTTAGCGCTCCCCATCGCATTTCGC  
TGGTCTTCCACCACAACCTGTAAATGAACCCCTACATCTTGACCACCCTTCTATTTGGT  
TTGGGCCTAGGTACAACACTCACATTTGCAAGCTCGCACTGACTTCTCGCTTGAATG  
GGCCTCGAAATTAATACTAGCCATTATTCCACTAATGGCTCAACATCACCACCCA  
CGAGCAGTAGAAGCAACTACTAAGTATTTCTAGCACAAAGCCACGGCAGCCGCCAC  
ACTCCTGTTTGCAAGCACAAACCAACGCTTGACTTACCGGCCAGTGGGACATCCAACA  
AATAACACACCCGTTACCCACAACAATAATTGTGATTGCCCTGGCACTAAAAATTGG  
ACTAGACCAATGCACTCTTGACTCCCCGAAGTTCTTCAGGGCCTAGACCTTACCAC  
CGGATTAATTCTGTCCACGTGACAAAAACTTGCCCCCTTTGCTCTCTTACTACAAATT  
CAAACAACAACCCACCCCGCTAATCATTATCGGTTTACTTTCTGCCCTTGTCTGGTG  
GGTGAGGTGGTCTTAACCAACACAGCTGCGTAAAATCCTGGCCTATTCCTCGATTG  
CACACCTTGGCTGAATAATACTGATCCTTCAATTTTCACCACTCCTGAGTCTCCTCGC

ACTCCTCACATATTTTCTATGACCTTTTCAGCATTCCTCATTTTCAAAGTCAACAAGG  
CCACCACTGTTAATGCACTCGCAATCTCCTGAGCAAAAACCCCTGCCCTCACAGCCC  
TCGCCCCCCTTGTTTTACTCTCCCTCGGTGGTCTTCCACCGCTTACCGGCTTCATACC  
CAAATGATTTATCCTCCAAGAGCTTACCAAACAGGATCTCCACCCCTCGCCACAATC  
GCTGCATTAAGTCCCCTGTTAAGCCTTTACTTCTACCTCCGCCTCTCGTATGCAATGA  
CCCTGACAATGTTCCCTAATAACCTCGTTGGTGTACCCCCCTGACGGTTCTACTCCCC  
CCAATTCACCCCTTCCCCTGGCCGTCTCAACCACAGCAACTACCCTTCTTCTGCCACTT  
GCCCCTGCTGCTGTGGCACTCCTCATCACCTATGAGCCTTCTTCTAACCATCATTTCA  
ATTACCGCCCTCCTCTCAACGGTACTTGCCATTGTGTCTTTTTGACTTCCTCAAATTA  
CACCAGACCACGAGAACTGTCACCATAACGAGTGTGGCTTTGACCCCATGGGTTCG  
CCCGACTACCCTTTTCACTGCGATTTTTTCTCATTGCAATCCTCTTTCTTCTATTGAC  
CTAGAAATTGCACTTCTCCTCCCCCTCCCATGAGGGGACCAACTAGCATCCCCCTCTG  
CTTACATTTATCTGAGCTACAGCTGTCCCTCTCCCTTCTAACCCTCGGCCTCATTTACG  
AATGAATGCAGGGAGGCCTAGAATGGGCTGAATATGCTAAAAATTCTAATCCCAAC  
ACTCATGCTAATTCCAACGGCCTGACTACTCAAACCTAGCTGGCTATGACCCATAAC  
TTTGTTATATAGCTTTTGCATCTCCCTGGCTAGTCTTTCATGGTTAAAAAATCTTTCA  
GAAACCGGCTGATCCTCACTCAACCTATTCATGGCCACCGACTCCCTGTCAACACCC  
CTCCTGGTTCTTACATGCTGGCTCCTCCCACTAATGATCTTAGCAAGCCAGAAGCAT  
ACAGCCTCAGAACCCTCGGTGCGCAACGTATATACATTACACTTCTCGCCTCCTTC  
AGTTTTTTCTAATCCTAGCATTTAGCGCCACTGAACTCGTAATGTTCTACGTAATATT  
TGAAGCTACCCTGATCCCCACACTTATTATCATTACCCGCTGAGGTAATCAAACAGA  
ACGCCTAAATGCGGGAACCTATTTCCCTCTTCTATACACTGGCAGGCTCGCTCCCCCTT  
CTTGTTGCTTTGCTCTTGCTCCAGAACACATCCGGAACCCTGTCACTATTAACCCTCC  
ATTACGGAGACCCTCTGACTATCAACCTATGCCGACAAGTTATGGTGAGCAGGCTGC  
CTTCTAGCCTTCCTAGTTAAATACCACTTTACGGTGTTCACCTATGACTCCCCAAAG  
CACACGTGAAGCCCCAATTGCAGGCTCAATAATCCTTGCAGCTGTTCTACTAAAC  
TAGGGGGTTACGGCATAATCCGCATAATAACAATGCTAGAGCCTCTAACTAAGGAA  
CTAAGCTACCCCTTCATTGTCTTTGCACTTTGAGGTGTAATTATAACTGGTTCAATTT  
GTCTACGCCAAACAGACCTTAAATCTCTAATTGCTTACTCATCTGTAAGCCACATGG  
GCCTGGTAGCCGGGGGAATTCTCATTCAATCGCCCTGAGGACTTACGGGAGCACTTA  
CACTTATAATTGCCCATGGTCTGACTTCCTCAGCCCTATTCTGCCTAGCAAACACAA  
ACTATGAGCGAACTCACAGCCGTACAATAGTCCTGGCACGGGGACTTCAAGTGGCA  
CTACCTCTTATAGCCACTTGATGGTTCATTTCCAGCCTGGCCAACCTGGCCTTGCCAC  
CACTACCCAACCTTATAGGAGAACTAATAATTACTTCTCTTTTTAACTGATCTTG  
ATGAACCCTGGCATTAAACAGGGTCCGGCACTCTCATTACGGCCGGTTACAGCCTCTA  
CATATTCCTAATAACACAACGAGGGCCCTCTCCAACACACGTAATTGCACTTGAACC  
ATCACACACCCGAGAACATCTTCTTATTGCCTTCATCTCATCCCTCTCATTCTCCTTA  
TGCTCAAGCCCGAGCTGATCTGAGGTTGGACTGCCTATGACCCCCACACACTTTGCC  
TTCTCCTCAGCCTTTTTTCTAGGTTTAAACAGGCCTGGCATTCCACCGGTTCCACCTCC  
TCTCCGCCCTATTGTGCCTTGAAGGGATAATACTATCCCTATTTGTTGCCCTCTCCTT  
GTGAACACTCCAAGTACTCAACTAACTTTTCAGCATCCCCCATGCTCCTCCTTGC  
ATTTTCAGCCTGTGAAGCAAGCGCCGGGCTCGCCCTTCTGGTCGCCACTGCCCGAAC  
CCACGGGACTGACCGACTACAAAGCCTAAATCTCCTCCAATGCTAAATGCACCCAC  
CTCCCTAATGATCTCATCAAGCTTGGTTACAATCTTTGCATTACTAGCCTACCCTCTG  
GCCACTACAATTCGTCCCACACCCCGAGGGCCTCAATGAGCAACATCTCACGTCAA  
ACAGCTGTAAAAATAGCCTTCTTTATCAGCCTCTTGCCCCTCGCTTTATTCCTTAACG  
AAGGCGCCGAAACAATCGTCACTAATTGAACCTGAATAAACACTAATACCTTCGAC  
ATCAACATTAGCCTAAAATTTGACTTTTATTCGATTATTTTTACACCAATTGCCCTCT

ACGTTACCTGGTCCATTCTAGAATTTGCATCATGATACATGCACGCCGATCCAAACG  
TGAACCGCTTTTTTAAGTATCTTCTGACATTTTTAATTGCCATAATTATTCTAGTAAC  
CGCAAACAACATGTTCCAACCTCTTTATCGGCTGAGAGGGTGTCTGGAATCATATCATT  
TCTCCTCATCGGATGATGATACGGACGAGCCGACGCTAACACTGCAGCACTTCAGGC  
AGTTCTATATAACCGGGTTCGGGGACATTGGACTTATCTTCGCTATGGCTTGAATGGC  
AACAAACCTGAACTCCTGAGAAATACAACAAATCTTTGCAACCTCCAAAGACATAG  
ACTTAACTTACCCCCCTCCTCGGACTAATCGTTGCAGCAACTGGGAAATCAGCTCAGT  
TTGGACTCCACCCTTGGCTACCCTCCGCTATGGAGGGTCTACACCGGTATCTGCCC  
TACTTCATTCTAGCACTATAGTCGTTGCCGGCATTTCCTGCTAGTCCGAATGAGCCC  
ACTTCTGGAAAATAACCCGACTGCTCTCACAACCTGTCTCTGCCTCGGGGCTCTTAC  
GACACTATTCAGTGAACCTTGTGCCCTTACGCAAAATGACATTAAAAAAATCGTTGC  
ATTCTCTACATCCAGCCAACTTGGCCTCATGATGGTAACTATCGGACTCAACCAACC  
CCAACCTAGCATTTCTGCACATCTGCACACATGCCTTCTTTAAAGCCATACTCTTTCTT  
TGCTCGGGGTCTATTATTCACAGCCTAAACGACGAACAAGACATCCGAAAAATAGG  
AGGAATACACCACCTTGCACCTTTCACATCATCTTGTCTAACAATTGGCAGCCTCGC  
ACTTACAGGGACCCCCCTTCTTGGCCGTTTCTTTTCTAAAGACGCCATCATCGAAGC  
ATTAAACACATCCCACCTAAACGCCTGAGCCCTAACCCCTTACCCTCCTGGCCACATC  
TTTTACAGCAATCTACAGCTTCCGAGTAATTTTCTTTGTTCCCATGGGCCACCCCCGA  
TTTAGCCCTTCTCCCCCATTAACGAAAACAACCCAGCAGTAATTAACCCGCTCAAAC  
GACTAGCATGGGGCAGTATCATTGCAGGACTACTAATTACCTCAAATATTACACCCC  
TAAAAACGCCTGTCATATCCATGCCTCCCCTCCTAAACTAGCCGCCCTTGCAGTTA  
CAATCGTAGGCCTACTTGTAGCCATGGAACCTCGCCATGCTAACCAACAAGCAATTTA  
AATCAACCCCCATCTTAACGTACACAACCTTCTCCAACATACTAGGCTTTTTTCCCTGCC  
ATTGTACATCGCCTAACCCCTAAATTAGGGCTCGTTCTCGGCCAAGACATCGCTAAT  
CAAATAGTGGACCAGACTTGGCTAGAAAAAGCAGGCCCCCAAAGCCATTGTATCCTC  
CAACCTCCCCCTGGTCTCCTCTACAAGTAATATTCAACGAGGAATAATCAAAACATA  
CCTACTCTCTTCTTTTAACACTAGCCCTTATAATCCCAACACTTATTCCCTAATGAC  
TTTTGTTATGTATTTAGTTTTATTTTCTCTTGTGTTGGGGTTGGTTGCAGTTGCTTCTA  
ACCCGTCCCCCTACTTTGCTGCTTTAGGATTGGTTGTGGTAGCTGGCATGGGGTGTG  
GTGTACTAGTCGGGCATGGGGGGCCCTTTTTGTCCCTAGTTCTATTTCTAATCTACTT  
AGGTGGGATATTAGTTGTATTTGCATACTCAGCAGCGTTAGCTGCTGAGCCGTACCC  
GGAAAGCTGGGGTAGCTGGTCGGTAATAGTTTACGGTTGTCTATGTGGCGGGGGTA  
GTGTGGTTTCTGCGTTGTTCTGAGGGGGGTGATATGAATCGTCTTGGGTCCTGGTAG  
ATGAGTTGGCGGAGTTTTCTGTGTTTCGAGGGGACATCGGAGGGGTAGCTTTAATAT  
ACTCTTCTGGGGGTTGGTTATTAATTATTAGTGCGTGGGTGTTACTTCTTACGCTGTT  
TGTGGTACTTGAGTTAACCGTGGCTTGAGCCGAGGGGCGTTGCGACAGTCT"/>

<sequence id="seq\_Pseudopleuronectes\_yokohamae\_KT8783091"

spec="Sequence" taxon="Pseudopleuronectes\_yokohamae\_KT878309" totalcount="4"

value="ATGATACTAAGCTTCTTTGACCAATTTATGTCCCCCGTATTCCTGGGCATCCC  
ACTAATTGCACTAGCAATTACACTGCCTTGAACACTTTTCCCAGCCCCCGTATCCGTT  
GATTAAACAACCGCCTAATCTCCCTTCAAGGCTGGTTTATTAGCGGCTTTACCTCAC  
AACTCCTTCTTCCGCTAAACCCGGGAGGCCACAAATGAGCGCTTCTATTGCGCTCGC  
TAATCTTTTCTTTTTCTATTAACATGCTCGGACTCCTTCCGTACACATTTACACCTACC  
ACCAACTCTCACTCAACCTCGGGCTTGCAGTCCCACTCTGATTGGCAACTGTCATC  
ATGGTATGCGGAACCAACCAACAATTGCTTTAGGCCACCTTCTTCCAGAAGGAAGCTC  
CTACCCTCCTGATCCCAGTACTAATTATCATCGAAACAATTAGCCTATTTATTCGACC  
CCTTGCTCTTGGTGTCCGACTTACAGCAAACCTCACAGCAGGCCATCTCCTCATTCA  
GCTCATTGCAACAGCTGCCTTCGTCTTCTCCCGCTTATACCTGTTGTTGCTATTTTA

ACAACAACGGTTCTTTTCCTCCTCACTCTTCTGGAAGTTGCCGTTGCTATAATTCAAG  
CCTATGTCTTTGTTCTACTTCTAAGTCTTTACCTACAAGAAAACGTTTAATGCCTCAA  
CTAAACCCCGCACCCCTGATTTGCAATTTTGGTTTTCTCTTGAATAATCCTTTTAACTG  
TCATTCCCCCAAAGTTTTAGCTCACACTTACCCTAATGAGCCAACCTCCCAAAGCA  
CACAAAAACAAAACAGAACCCTGAAACTGACCATGATACTAAGTGGCAATCACACG  
TTGATTTTTCTCGACCAATCACAAAGACATCGGCACCCTCTATCTTGTATTTGGTGCC  
TGAGCCGGAATAGTGGGAACAGGCCTAAGTCTGCTCATTGAGCAGAGCTAAGCCA  
ACCCGGGGCTCTCCTGGGAGACGACCAAATTTATAACGTAATCGTCACCGCACACG  
CCTTTGTAATAATCTTCTTTATAGTAATACCAATTATGATCGGAGGGTTCGGAAACT  
GACTTATTCCATTAATAATTGGGGCCCCCGATATGGCCTTCCCTCGAATAAATAACA  
TGAGCTTCTGACTTCTACCCCCATCCTTTCTCCTCCTTCTAGCCTCTTCAGGCGTTGA  
AGCTGGGGCAGGAACAGGATGAACCGTGTATCCCCCACTAGCTGGAAATCTAGCAC  
ACGCCGGAGCATCAGTAGACCTCACCATTTTCTCACTTCACCTTGCCGGAATTTTCAT  
CAATTCTAGGGGCAATCAACTTTATTACTACCATCATCAACATGAAACCAACAGCAG  
TCACTATGTACCAAATCCCACTATTTGTCTGGGCCGTACTAATCACCGCCGTTCTTCT  
TCTTCTTTCCCTACCCGTCTGGCCGCTGGCATTACAATGCTGCTGACAGACCGCAA  
CCTAAACACAACCTTCTTTGACCCTGCCGGAGGGGGTGACCCCATCCTCTACCAACA  
CCTATTCTGGTTCTTTGGTCATCCAGAAGTTTACATTTTAATTCTTCCAGGCTTCGGG  
ATGATTTCTCACATTGTTGCATATTATGCAGGTAAGAAAGAACCCTTTGGTTACATA  
GGAATAGTCTGGGCTATGATGGCTATCGGACTCCTGGGCTTCATTGTATGAGCCAC  
CACATGTTTACAGTCGGAATAGATGTGGACACACGAGCCTATTTTACCTCTGCCACA  
ATAATTATTGCCATTCCAACCGGCGTAAAAGTTTTTAGCTGACTCGCAACCCTTCAT  
GGAGGAAGCATTAAATGAGAAACCCCACTCCTGTGGGCCCTAGGCTTTATTTTCCTA  
TTTACAGTGGGAGGTCTTACTGGTATTGTCTTAGCTAACTCGTCTCTTGACATTGTGC  
TTCATGACACATACTATGTAGTAGCCCACTTCCACTATGTCTTATCTATGGGGGCTGT  
ATTTGCAATCGTTGCCGCTTTCGTACACTGATTCCCCCTATTTACAGGCTATACTCTC  
CACTCCACATGAACAAAAATTCACTTTGGCCTAATGTTTGTAGGGGTAAACCTCACA  
TTCTTCCCCCAACATTTCTGCGGCTCTCGCCGGAATGCCTCGGCGATATTCAGACTACC  
CGGACGCATACACCCTTTGAAATACTGTCTCATCGATCGGCTCACTAATGTCGCTCG  
TCGCTGTGATTTTATTTTGTATTATTGAGAAGCATTACGGCCAAACGAGAAGT  
CGGGGCAGTAGAACTAACTTCACTAATATTGAATGACTTTACGGCTGCCCTCCACC  
TTACCACACATTTGAGGAGCCCGCATTTCGTTCAAGTTCGTATAAAATAAATGGCACA  
TCCATCACAACCTGGGATTTCAAGACGCAGCTTCCCCCTTATAGAAGAACTACTTCA  
CTTCCATGACCACGCCTTAATAATTGTCATTCTCATCAGCACAATGGTACTTTATATC  
ATTGTGGCAATGGTCACGGCCCACTAACCGATAAGCTTGTGTTAGACTCTCAAGAA  
ATTGAAGTTATCTGAACAGTTCTCCAGCTATTATTCTTATTCTCATCGCCCTCCCGT  
CTCTCCGAATTTTATACCTAATAGACGAAATTAATGATCCTCACCTGACAATTAAAG  
CCTTAGGTCACCAATGATACTGAAGCTACGAATACACAGACTACCAAGACCTCGGT  
TTGACTCCTACATGGTCCCAACTCAAGACCTAACCCCGGACAATTCCGACTACTAG  
AAGCAGACCACCGAATGGTAATTCCTGTAGAATCTCCAATTCGGGTCTTATCTCAG  
CTGAAGATGTCTTGCATTCATGAGCAGTCCCCTCCCTGGGCGTAAAAGTAGACGCCG  
TACCTGGACGATTAAACCAAGCAACCTTTATTGTTAGCCGACCCGGCGTATTCTATG  
GTCAATGCTCTGAAATTTGCGGGGCAAACCACAGCTTTATGCCCGTCGTTGTAGAGG  
CAGTCCCACTTGACCCTTTGAGAAGTGGTCTTCGCTAATAATTGAAGACGCCTATG  
GCCCCCTCAAGCACACCCATACCACATAGTCGACCCGAGCCCATGACCCCTCACGGG  
GGCTATTGCTGCCCTATTGATAACATCTGGCCTTGCTATCTGATTCCACTTTCCTCC  
ACAACCCTAATAACTATTGGAACAATCCTTCTCACTCTAACAGTCTTTCATGATGA  
CGAGACGTCGTTTCGAGAAGGGACATTTCAAGGACACCACACCCTCCCGTTCAAAA

AGGCCTCCGATACGGAATAATTCTATTTATTACATCAGAAGTCCTATTCTTCCTAGG  
CTTCTTCTGAGCCTTTTACCCTCAAGCCTAGCACCCACTCCCGACCTAGGGGGCTTT  
TGACCACCAGCAGGCATCACACCTTTAGACCCCTTCGAAGTCCCGCTTCTAAACACA  
GCAGTACTGCTTGCCCTCAGGCGTAACTGTTACATGGGCACATCACAGCATCATAGAA  
GGTAAACGAAAACAAGCTATTCAATCTCTCGCCCTAACAACTTACTCGGGGGGATAC  
TTCACCTTCCTCCAAGGCCTTGAGTACCACGAAGCCCCCTTCACCATCGCAGACGGG  
GTTTACGGTGCTACATTCTTTGTTGCCACCGGCTTCCACGGACTTCACGTCTTAATTG  
GGTCGTCTTTCCTAGCCGTTTGTCTACTACGCCAAATTCTCCACCACTTTACATCAGA  
CCACCACTTTGGGTTTGAAGCAGCCGCATGATACTGACACTTCGTAGACGTCTGTCTG  
ACTCTTCCTCTATATCTCTATTTACTGATGAGGATCTTAATGGCCAATCTCCGTAAAT  
CTCACCCCCCTTCTTAAAATCGCAAACGATGCTTTAGTCGACCTCCCAGCCCCCTCGA  
ACATTTCTGTCTGATGAAACTTTGGGTCTCTTTTAGGACTCTGCCTAGTGACCCAAAT  
CGCTACCGGCTTATTTTTAGCCATACACTACACATCGGATATTGCTACTGCCTTCACC  
TCCGTTGCACACATCTGCCGGGACGTCAACTACGGCTGACTTATCCGAAGCATCCAT  
GCCAATGGCGCATCATTCTTTTTTATCTGTATCTACCTTCACATCGGCCGGGGTCTCT  
ACTACGGCTCCTACCTGTACAAAGAAACATGAACCATCGGAGTCGTCCTGCTGCTCC  
TTGTAATGATAACCGCTTTCGTCTGGATACGTCTCCTTGAGGACAAATGTCATTTTG  
AGGTGCAACCGTCATTACCAACCTACTATCTGCAGTACCTTATGTTGGGGGTACTCT  
TGTCCAGTGAATTTGAGGTGGCTTTTCTGTAGATAATGCCACCCTCACTCGGTTCTTT  
GCGTTCCACTTCCTCTTCCCTTTCATTATCGCAGCCGCAACAGTTATTCATCTTCTTTT  
TCTCCACGAAACTGGTTCAAACAATCCTACCGGCCTGAACTCGGATTCCGACAAAGT  
CCCCTTCCACCCCTACTTTACGTACAAAGATCTCTTGGCTTCGCAGTTCTTCTGACTG  
CACTGGCCTCCCTCGCCCTATTTTCCCCAAATCTTTTAGGAGACCCGGACAATTTTAC  
CCCCGCAAACCCGCTTGTTACACCTCCTCACATCAAGCCAGAATGATACTTCCTCTTT  
GCTTACGCCATTCTCCGCTCCATTCCAAACAAGCTTGGGGGCGTACTTGCCCTTCTAT  
TCTCGATTCTGGTTCTTATGCTCGTTCCCTTTCTCCACACATCTAAACAACGAAGCTT  
AATATTTTCGTCCTGTAAACACAATTCCTGTTCTGATCTTTAGTAGCTGACGTAATAATT  
CTGACTTGAATTGGAGGAATACCCGTAGAACACCCTTTCGTTATCATTGGACAAGTA  
GCATCCCTCATCTACTTCTCCCTTTTCTGCTCCTAATCCCAACAGCAGGCTGAATGG  
AAAACAAAGTCCTTGGATGAAAATATGATTTCAACCCTCATTACGCATATTATTAAT  
CCACTAGCCTTTATTGTACCCGTTTGTAGCCGTAGCATTCTTACCCTCCTTGAAC  
GAAAAGTGCTAGGCTATATACAACCTCCGAAAAGGGCCTAACATCGTAGGGCCTTAC  
GGCCTTCTTCAACCCATTGCTGACGGGGTGAAACTATTTATCAAGGAACCCGTTTCGC  
CCTTCAACCGCCTCGCCTGTTCTGTTCCCTCCTAGCCCCCATACTCGCACTCACCTTGG  
CTCTGACCCTTTGAGCCCCCATGCCTTTTCCCTACCCCGTTATTGACCTTAACCTGGG  
TATCTTATTCATCCTGGCACTGTCTAGTCTTGCAGTTTATTCCATCCTTGGGTCAGGA  
TGAGCATCCAATTCAAAATATGCCCTAGTGGGTGCACTACGAGCTGTTGCCCAAACG  
ATCTCTTACGAAGTGAGCCTTGGGCTCATTTTACTCAACATCATTATCTTTACAGGAG  
GCTTCACGCTTCAGACCTTTAACACAGCCCAAGAAGCCATCTGACTGGTTGTGCCTG  
CCTGACCCCTAGCTGCCATGTGATACATTTCCACCCTTGCCGAAACAAACCGTGCAC  
CCTTCGACCTAACAGAGGGGGAGTCTGAACTTGTCTCAGGCTTTAACGTAGAATATG  
CAGGAGGCCCTTCGCTTTATTCTTTTTAGCTGAATACTCAAACATTCTCCTAATGAA  
TGCTCTATCCGCAACACTATTTCTGGGCGCCTCTCACATTCCGTCTATCCCAGAATTA  
ACCAGCATTAATATTATAACTAAAGCAGCTCTTCTCTCAGTTGTCTTTCTCTGGGTTT  
GAGCCTCATATCCACGGTTCCGTTACGACCAACTCATAACCTCATTTGAAAAAATT  
TCCTCCCATAACACTAGCCCTGGTTATTTGACACTTAGCGCTCCCCATCGCATTCGC  
TGGTCTTCCACCACAACCTGTAAATGAACCCCTACATCTTGACCACCCTTCTATTTGGT  
TTGGGCCTAGGTACAACACTCACATTTGCAAGCTCGCACTGACTTCTCGCTTGAATG

GGCCTCGAAATTAATACTAGCCATTATTCCACTAATGGCTCAACATCACCACCCA  
CGAGCAGTAGAAGCAACTACTAAGTATTTCTAGCACAAGCCACGGCAGCCGCCAC  
ACTCCTGTTTGCAAGCACAACCAACGCTTGACTTACCGGCCAGTGGGACATCCAACA  
AATAACACACCCGTTACCCACAACAATAATTGTGATTGCCCTAGCACTAAAAATTGG  
ACTAGCACCAATGCACTCTTGACTCCCCGAAGTTCTTCAGGGCCTAGACCTTACCAC  
CGGATTAATTCTGTCCACGTGGCAAAAACCTTGCCCCCTTTGCTCTCTTACTACAAATT  
CAAACAACAACCCACCCCGCTAATCATTATCGGTTTACTTTCTGCCCTTGTCGGTG  
GGTGAGGTGGTCTTAACCAAACACAGCTGCGTAAAATCCTGGCCTATTCTCTGATTG  
CACACCTTGGCTGAATAATACTGATCCTTCAATTTTCACCACTCCTGAGTCTCCTCGC  
ACTCCTCACATATTTTCTATGACCTTTTCAGCATTCCTCATTTTCAAAGTCAACAAGG  
CCACCACTGTTAATGCACTCGCAATCTCCTGAGCAAAAACCCCTGCCCTCACAGCCC  
TCGCCCCCCTTGTTTTACTCTCCCTCGGTGGTCTTCCACCGCTTACCGGCTTCATACC  
CAAATGATTTATCCTCCAAGAGCTTACCAAACAGGATCTCCACCCCTCGCCACAATC  
GCTGCATTAACCTGCCCTGTTAAGCCTTTACTTCTACCTCCGCCTCTCGTATGCAATGA  
CCCTGACAATGTTCCCTAATAACCTCGTTGGTGTACCCCCCTGACGGTTCTACTCCCC  
CCAATTCACCCCTTCCCCTGGCCGTCTCAACCACAGCAACTACCCTTCTTCTGCCACTT  
GCCCCTGCTGCTGTGGCACTCCTCATCACCTATGAGCCTTCTTCTAACCATCATTTCA  
ATTACCGCCCTCCTCTCAACGGTACTTGCCATTGTGTCTTTTTGACTTCCTCAAATTA  
CACCAGACCACGAGAACTGTCACCATAACGAGTGTGGCTTTGACCCCATGGGTTCGG  
CCCGACTACCCTTTTCACTGCGATTTTTTCTCATTGCAATCCTCTTTCTTCTATTGAC  
CTAGAAATTGCACTTCTCCTCCCCCTCCCATGAGGGGACCAACTAGCATCCCCCTCTG  
CTTACATTTATCTGAGCTACAGCTGTCCTCTCCCTTCTAACCCTCGGCCTCATTTACG  
AATGAATGCAGGGAGGCCTAGAATGGGCTGAATATGCTAAAAATTCTAATCCCAAC  
ACTTATGCTAATTCCAACGGCCTGACTACTCAAACCTAGCTGGCTATGACCCATAAC  
TTTGTTATATAGCTTTTGTATCTCCCTGGCTAGTCTTTCATGGTTAAAAAATCTTTCA  
GAAACCGGCTGATCCTCACTCAACCTATTCATGGCCACCGACTCCCTGTCAACACCC  
CTCCTGGTTCTTACATGCTGGCTCCTCCCACTAATGATCTTAGCAAGCCAGAAGCAT  
ACAGCCTCAGAACCACTCGGTTCGGCAACGTATATACATTACACTTCTCGCCTCCTTC  
AGTTTTTTCTAATCCTAGCATTTAGCGCCACTGAACTCGTAATGTTCTACGTAATATT  
TGAAGCTACCCTGATCCCCACACTTATTATCATTACCCGCTGAGGTAATCAAACAGA  
ACGCCTAAATGCGGGAACCTATTTCTCTTCTATACACTGGCAGGCTCGCTCCCCCTT  
CTTGTTGCTTTGCTCTTGCTCCAGAACACATCCGGAACCCTGTCACTATTAACCCTCC  
ATTACGGAGACCCTCTGACTATCAACCTATGCCGACAAGTTATGATGAGCAGGCTGC  
CTTCTAGCCTTCCTAGTTAAAAATACCACTTTACGGTGTTACCTATGACTCCCCAAAG  
CACACGTCGAAGCCCCAATTGCAGGCTCAATAATCCTTGCAGCTGTTCTACTTAAAC  
TAGGGGGTTACGGCATAATCCGCATAATAACAATGCTAGAGCCTCTAACTAAGGAA  
CTAAGCTACCCCTTCATTGTCTTTGCACTTTGAGGTGTAATTATAACCGGTTCAATTT  
GTCTACGCCAAACAGACCTTAAATCTCTAATTGCTTACTCATCTGTAAGCCACATGG  
GCCTGGTAGCCGGGGGAATTCTCATTCAATCGCCCTGAGGACTTACGGGAGCACTTA  
CACTTATAATTGCCCATGGTCTGACTTCCTCAGCCCTATTCTGCCTAGCAAACACAA  
ACTATGAGCGAACTCACAGCCGTACAATAGTCCTGGCACGGGGACTTCAAGTGGCA  
CTACCTCTTATAGCCACCTGATGGTTCATTTCCAGCCTGGCCAACCTGGCCTTGCCAC  
CACTACCCAACCTTATAGGAGAACTAATAATTATTACTTCTCTTTTTAACTGATCTTG  
ATGAACCCTGGCATTAACAGGGTCCGGCACTCTCATTACGGCCGGTTACAGCCTCTA  
CATATTCCTAATAACACAACGAGGCCCTCTCCCAACACACGTAATTGCACTTGAACC  
ATCACACACCCGAGAACACCTTCTTATTGCCTTCATCTCATCCCTCTCATTCTCCTTG  
TGCTCAAGCCCGAGCTGATCTGAGGTTGGACTGCCTATGACCCCCACACACTTTGCC  
TTCTCCTCAGCCTTTTTTCTAGGTTTAAACAGGCCTGGCATTCCACCGGTTCCACCTCC



TCTCCGCCCTATTGTGCCTTGAAGGGATAATACTATCCCTATTTGTTGCCCTCTCCTT  
GTGAACACTCCAAC TAGACTCAACTAACTTTTCAGCATCCCCCATGCTCCTCCTTGC  
ATTTTCAGCCTGTGAAGCAAGCGCCGGGCTCGCCCTTCTGGTCGCCACTGCCCCAAC  
CCACGGAAC TGACCGACTACAAAGCCTAAATCTCCTCCAATGCTAAATGCACCCAC  
CTCCCTAATGATCTCATCAAGCTTGGTTACAATCTTTGCATTACTAGCCTACCCTCTG  
GCCACTACAATTCGTCCCACACCCCGAGGGCCTCAATGAGCAACATCTCACGTCAAA  
ACAGCTGTAAAAATAGCCTTCTTTATCAGCCTCTTGCCCCCTCGCTTTATTCCTTAACG  
AAGGCGCCGAAACAATCGTCACTAATTGAACCTGAATAAACACTAATACCTTCGAC  
ATCAACATTAGCCTAAAATTTGACTTTTATTCGATTATTTTTACACCAATTGCCCTCT  
ACGTTACCTGGTCCATTCTAGAATTTGCATCATGATACATGCACGCCGATCCAAACG  
TGAACCGCTTTTTTAAGTATCTTCTGACATTTTTTAATTGCCATAATTATTCTAGTAAC  
CGCAAACAACATGTTCCAACCTTTTATCGGCTGAGAGGGTGTCGGAATCATATCATT  
TCTCCTCATCGGATGATGATACGGACGAGCCGACGCTAACACTGCAGCCCTTCAGGC  
AGTTCTATATAACCGGGTCGGGGACATTGGACTTATCTTCGCTATGGCTTGAATGGC  
AACAAACCTGAACTCCTGAGAGATACAACAAATCTTTGCAACCTCCAAAGACATAG  
ACTTAACTTACCCCCCTCCTCGGACTAATCGTTGCAGCAACTGGGAAATCAGCTCAGT  
TTGGACTCCACCCTTGGCTACCCTCCGCTATGGAGGGTCTACACCGGTATCTGCCC  
TACTTCATTCTAGCACTATGGTCGTTGCCGGCATTTCCTGCTAGTCCGAATGAGCCC  
ACTTCTGGAAAATAACCCGACTGCTCTCACAACCTGTCTCTGCCTCGGGGCTCTTAC  
GACACTATTCACTGCAACTTGTGCCCTTACGCAAAATGACATTAAAAAATCGTTGC  
ATTCTCTACATCCAGCCAACCTTGGCCTCATGATGGTAACTATCGGACTCAACCAACC  
CCAAC TAGCATTCTGCACATCTGCACACATGCCTTCTTTAAAGCCATACTCTTTCTT  
TGCTCGGGATCTATTATTCACAGCCTAAACGACGAACAAGACATCCGAAAAATAGG  
AGGAATACACCACCTTGCACCTTTCACATCATCTTGTCTAACAATTGGCAGCCTCGC  
ACTTACAGGGACCCCCTTCTTGGCCGGTTTCTTTTCTAAAGACGCCATCATCGAAGC  
ATTAAACACATCCCACCTAAACGCCTGAGCCCTAACCTTACCCTCCTGGCCACATC  
TTTTACAGCAATCTACAGCTTCCGAGTAATTTTCTTTGTTCCCATGGGCCACCCCCGA  
TTTAGCCCTTCTCCCCCATTAACGAAAACAACCCAGCAGTAATTAACCCGCTCAAAC  
GACTAGCATGGGGCAGTATCATTGCAGGACTACTAATTACCTCAAATATTACACCCC  
TAAAAACGCCTGTCATATCCATGCCTCCCCCTCCTAAACTAGCCGCCCTTGCAGTTA  
CAATCGTAGGCCTACTTGTAGCCATGGAAC TCGCCATACTAACCAACAAGCAATTTA  
AATCAACCCCCATCTTAACGTACACAACCTTCTCCAACATACTAGGCTTTTTCCCTGCC  
ATTGTACACCGCCTAACCCCTAAATTAGGGCTCGTTCTCGGCCAAGACATCGCTAAT  
CAAATAGTGGACCAGACTTGGCTAGAAAAAGCAGGCCCCCAAAGCCATTGTATCCTC  
CAACCTCCCCCTGGTCTCCTCTACAAGTAATATTCAACGAGGAATAATCAAAACATA  
CCTACTCTCTTCCTTTTAACACTAGCCCTTATAATCCCAACACTTATTCCCTAATGAC  
TTTTGTTATGTATTTAGTTTTATTTTCTCTTGTGTTGGGGTTGGTTGCAGTTGCTTCTA  
ACCCGTCCCCCTACTTTGCTGCTTTAGGATTGGTTGTGGTAGCTGGCATGGGGTGTG  
GTGTACTAGTCGGGCATGGGGGGGCCCTTTTTGTCCTTAGTTCTATTTCTAATCTACTT  
AGGTGGGATATTAGTTGTATTTGCATACTCAGCAGCGTTAGCTGCTGAGCCGTACCC  
GGAAAGCTGGGGTAGCTGGTCGGTAATAGTTTACGGTTGTCTATGTGGCGGGGGTA  
GTGTGGTTTCTGCGTTGTTCTGAGGGGGGTGATATGAATCGTCTTGGGTCTGGTAG  
ATGAGTTGGCGGAGTTTTCTGTGTTTCGAGGGGACATCGGAGGGGTAGCTTTAATAT  
ACTCTTCTGGGGGTGGTTATTAATTATTAGTGC GTGGGTGTTACTTCTTACGCTGTT  
TGTGGTACTTGAGTTAACCGTGGCTTGAGCCGAGGGGCGTTGCGACAGTCT"/>

<sequence id="seq\_Reinhardtius\_hippoglossoides\_AM7491301"

spec="Sequence" taxon="Reinhardtius\_hippoglossoides\_AM749130" totalcount="4"

value="ATGATACTAAGCTTTTTTGACCAATTTATATCCCCAGTATACCTCGGTATTCC

GCTAATTGCACTAGCAATTACCCTCCCCTGAATTCTGTTCCCAACCCCTCAAGCCGCT  
GATTAAACAACCGTGTGCTAACACTTCAAGGATGATTTATTAGCCGCTTCACCTCAC  
AACTTCTTCTTCCCCTAAACCCCGGGGGCCACAAATGAGCAGTTTTATTACCTCATT  
AATGTTTTTCTTTTCTATTAACATACTAGGACTCCTTCCATATACCTTCACACCAACA  
ACCCAACCTCTCCCTTAATATGGGCCTCGCAGTTCCCCTCTGATTAGCAACTGTCATTA  
TGGAATGCGAAATCAACCTACACATGCCCTAGGTCACCTCCTTCCAGAAGGCACCCC  
TACTGCTCTCATCCCTGTACTCATCATCATTGAAACAATTAGCCTATTTATTCGACCC  
CTCGCTCTCGGTGTTGACTAACAGCGAATCTCACAGCAGGCCACCTCCTTATTCAA  
CTCATTGCAACAGCTGCCTTTGTCTTCTTCCGCTCATACTGTTGTTGCTATCTTAA  
CAACGGTGGTCTCTTCTTCTTACTCTGCTAGAAGTCGCGGTGCGCATGATCCAAG  
CCTATGTCTTTGTTCTACTCTTAAGCCTATATCTACAAGAGAACGTTTAATGCCTCAA  
CTGAACCCCGCACCCCTGATTTGCAATTTTAGTTTTCTCTTGAATAATCTTTTTAACTG  
TTATTCCCCCAAAGTTTTAGCACATACTTACCCCAATGAACCTACCTCCCAAAGCA  
CACAAAAACAAAACAGAACCCTGAAACTGACCATGATACTAAGTGGCAATCACACG  
TTGATTTTTCTCGACCAATCACAAAGACATCGGCACCCTCTATCTCGTATTTGGTGCC  
TGAGCCGGTATAGTGGGAACAGGCCTAAGTCTGCTTATTCGGGCAGAACTAAGCCA  
ACCTGGGGCTCTCCTTGGAGACGACCAAATTTATAACGTAATCGTCACCGCACACGC  
CTTTGTAATAATCTTTTTTATAGTAATACCCATTATGATCGGGGGTTTCGGAACTGG  
CTTATTCCACTAATAATTGGAGCCCCAGATATGGCTTTCCTTCGAATAAATAACATG  
AGTTTCTGACTTCTTCCCCCATCCTTTCTTCTCCTCTTAGCCTCTTCAGGTGTTGAAGC  
TGGGGCAGGTACGGGGTGAACCGTTTATCCACCACTAGCTGGTAATCTGGCCCCACGC  
CGGAGCATCCGTTGACCTAACAATCTTCTCACTTCACCTTGCAGGGATTTCGTCAATT  
CTGGGGGCAATTAACCTTTATTACTACCATCATCAACATGAAACCCACAACAGTTACT  
ATGTACCAAATCCCATTATTTGTTTGAGCCGTTCTAATTACCGCCGTACTTCTTCTTC  
TGTCCCTTCCCGTCTTAGCCGCAGGGATTACAATGCTACTAACAGACCGCAACCTCA  
ACACAACCTTTTTTGACCCCGCCGGAGGTGGTGACCCCATCCTCTATCAACACCTAT  
TCTGATTCTTTGGCCACCCAGAGGTATATATTCTCATTCTTCCAGGCTTCGGAATAAT  
TTCCACATTGTTGCATACTATGCAGGTAAAAAAGAACCTTTTGGTTACATAGGAAT  
AGTCTGAGCTATAATAGCCATTGGACTCCTGGGATTCAATTGTATGGGCCCATCACAT  
GTTTACAGTCGGGATAGACGTCGACACACGAGCCTACTTTACATCTGCCACAATAAT  
CATTGCAATCCCGACCGGCGTAAAAGTCTTTAGCTGACTCGCAACCCCTCCACGGGGG  
AAGCATCAAATGAGAAACACCACTTCTTTGGGGCCCTCGGCTTTATTTTCTCTTTACA  
GTAGGCGGTCTTACTGGCATTGTCTTGGCTAACTCCTCTCTTGACATTGTTCTGCATG  
ACACATACTATGTAGTAGCCCACTTCCACTATGTACTATCTATGGGTGCTGTATTTCGC  
AATCGTTGCCGCCTTCGTCCACTGATTCCCCTATTTACAGGTTATACCCCTCCACTCC  
ACATGAACAAAAATCCACTTCGGCCTGATATTTATTGGGGTCAATCTAACGTTCTTC  
CCCCAACACTTCCTGGGCCTAGCCGGAATGCCCCGACGATACTCAGACTACCCAGAC  
GCATATACCCTATGAAACACTGTCTCATCAATCGGATCCCTAATGTCGCTCGTCGCT  
GTAATCTTATTTTTGTTTATTATTTGAGAAGCATTACAGCCAAACGAGAAGTTGGG  
GCAGTAGAACTTACTGCAACTAACATCGAATGACTTTACGGCTGCCCTCCACCCTAC  
CACACATTTGAAGAGCCCGCATTCGTCCAAGTTCGAATAAACTAAATGGCACATCCC  
TCACAACCTCGGATTTCAAGACGCAGCTTCACCCTTAATAGAAGAACTACTTCACTTC  
CACGATCACGCCTTAATAATTGTAATTCTCATCAGCACGATAGTACTTTATATTATTG  
CGGCTATAGTTACAGCCAACTAACAGATAAACTTGTTCTAGATTCTCAAGAAATTG  
AAATTATCTGAACAGTTCTCCCAGCTGTTATTCTTATTCTCATCGCCCTACCATCTCT  
CCGAATTTTGTACTTAATAGACGAAATTAATGATCCCCACTTAACAATCAAAGCCAT  
GGGCCACCAGTGGTACTGAAGCTACGAATACACAGACTATGAAGACCTCGGTTTTG  
ACTCTTACATAATCCCCACACAAGACCTGACCCCTGGGCAGTTCCGACTACTTGAAG

CAGATCACCGGATAGTAATCCCGGTAGAATCCCCTATTCGCGTTCTAATCTCAGCTG  
AAGATGTATTACATTCCTGAGCAGTCCCCTCCCTGGGCGTAAAAGTTGACGCCGTAC  
CTGGACGATTAAATCAAGCAACCTTTATTGTTAGCCGGCCAGGCGTATTTTATGGTC  
AATGCTCTGAAATTTGCGGAGCAAACCATAGTTTTATACCCATCGTTGTAGAAGCAG  
TCCCCCTTGAACACTTTGAAAACCTGGTCTTCACTAATAATTGAAGACGCCTATGGCC  
CATCAAGCACACCCATAACCACATAGTCGACCCCAGTCCATGACCCCTCACGGGGGCT  
ATTGCTGCCCTATTGATAACATCTGGCCTTGCTATCTGATTTCACTTCCATTCCACAA  
CCCTTATAACTATTGGGACAGTCCTTCTCACCTTAACAATCTTCCAATGATGACGGG  
ACGTCGTACGAGAAGGCACATTTCAAGGACACCACACTCCCCCTGTTCAAATAGGC  
CTCCGATACGGAATAATCTTATTTATTACCTCAGAAGTTCTGTTCTTCTTAGGCTTCT  
TCTGAGCCTTTTACCACTCAAGCCTAGCACCTACTCCAGAACTAGGAGGCTTCTGAC  
CCCCAGCAGGCATTACCCCTTTAGACCCATTTGAAGTCCCGCTTCTTAACACAGCAG  
TCCTCCTTGCCCTCTGGTGTAACCTGTTACCTGAGCACATCACAGCATTATAGAGGGTA  
AACGGAAACAAACTATTCAATCTCTTGCCCTCACAATCTTACTCGGGGGTTACTTCA  
CTTTTCTCCAAGGCCTTGAGTATGTCGAAGCCCCCTTCACCATTGCAGACGGAGTTT  
ACGGTGCTACATTCTTTGTTGCCACCGGCTTCCACGGCCTCCACGTCTTAATCGGCAC  
CTCATTCTTAGCCGTTTGTCTGTTACGCCAAATCCTTCACCATTTTACATCAAACCAC  
CACTTTGGGTTTGAAGCAGCCGCATGATACTGACACTTCGTAGACGTCGTCTGACTT  
TTCCTCTATATCTCTATTTACTGATGAGGATCTTAATGGCCAGTCTACGTAAATCCCA  
CCCTCTTCTAAAAATCGCAAACGATGCTTTAGTTGACCTCCCAGCCCCCTCTAATATC  
TCCGTTTGGTGAAACTTTGGGTCTCTTCTAGGACTCTGTTTAGTAACCCAAATTGCTA  
CCGGCTTGTTTCTAGCCATACACTACACATCAGATATTGCTACTGCCTTCACCTCCGT  
GGCTCACATCTGCCGGGACGTCAACTACGGCTGACTTATCCGAAGCATTTCATGCCAA  
CGGCGCATCATTCTTTTTTCATTTGCATCTACCTACACATCGGCCGAGGGCTCTACTAT  
GGCTCATACCTCTATAAAGAAACATGAACTATTGGAGTCGTCCTCCTCCTCCTCGTA  
ATAATAACGGCCTTCGTCCGATACGTCCCTCCCTTGAGGACAAATGTCCTTTTGAGGT  
GCAACCGTTATTACCAACCTCCTATCCGCCGTCCCCTATGTTGGCGACACCCTAGTC  
CAATGGATTTGAGGTGGTTTTTCTGTAGACAATGCTACCCTTACCCGGTTCTTTGCCT  
TCCACTTCCTTTTCCCCTTCATCATCGCCGCCGCAACAGTAATCCATCTACTATTTCT  
TCACGAAACTGGCTCAAATAATCCCACCGGCTTAAACTCAGACTCAGACAAGGTTCC  
CTTCCACCCTTACTTCACTTACAAAGACCTCTTGGTTTTTGCAGTGCTCCTCACTGCAT  
TAGCATCCCTCGCTTTGTTTTCTCCTAATCTTTTAGGAGACCCAGATAACTTTACCCC  
CGCAAATCCACTTGTTACACCCCCACACATTAAACCAGAGTGATACTTCCTCTTTGC  
TTACGCTATTCTCCGGTCCATCCCAAACAACTTGAGAGGCGTTCTTGCCCTTTTATTT  
TCGATCTTAGTTCTCATGCTTGTCCTTTCCTTCACACCTCTAAACAACGCAGCCTAA  
TGTTTTCGCCCTCTAACGCAATTTTTGTTCTGGTCTCTGGTAGCAGACGTTATAATTCT  
AACTTGAATTGGAGGAATGCCCCGTAGAACACCCCTTCGTTATCATTGGACAAGTAGC  
ATCACTCCTTTACTTCGCCCTCTTTCTAGTCCTAATCCCAACAGCAGGTTTACTAGAG  
AATAAAGTCCTTGATGAAAATATGATTTCAACTCTCATTACCCATATTATTAACCC  
CCTAACCTTTATTGTACCTGTACTGCTAGCCGTAGCATTCTCACCCTCCTTGAACGG  
AAAGTCCTAGGCTACATACAACTCCGAAAAGGGCCTAACATCGTAGGGCCTTACGG  
CCTCCTTCAACCCATTGCTGACGGCGTAAAACCTCTTTATTAAAGAACCCGTTCCGCC  
TTCCACCGCATCCCCCGTTCTGTTCTCCTGGCCCCCTATACTCGCACTCACACTGGCC  
CTAACCTTTGAGCCCCGATGCCTTTCCCGTACCCTGTTGTGGACCTTAACCTGGGTA  
TCCTTTTTATTCTAGCACTATCTAGCCTTGCAGTATACTCTATTCTTGGGTCTGGTTG  
AGCATCCAATTCAAATAACGCTTTAGTAGGAGCACTACGAGCTGTTGCACAAACAA  
TTTCTTACGAAGTTAGCCTAGGACTCATCCTCCTTAACATCATCATCTTTACCGGAGG  
ATTTACACTTCAGACCTTTAACACAGCCCAAGAGGCCATCTGACTAGTTGTACCCGC

CTGACCCCTCGCTGCCATATGATACATCTCCACTCTTGCCGAAACAAACCGTGCACC  
CTTCGACCTAACAGAAGGGGAATCTGAACTTGTTTCAGGCTTCAACGTAGAATACGC  
AGGAGGACCCTTCGCTTTGTTCTTTTTAGCCGAATACTCAAATATCCTCCTAATAAAT  
ACCCTGTCCGCAACATTATTTTTGGGCGCCTCCCACATTCCCTCTATCCCAGAATTAA  
CTAGCATTAATATTATAACTAAAGCAGCCCTTCTCTCAATTGTTTTTCTGTGAGTCCG  
AGCTTCGTACCCGCGATTCCGTTACGACCAACTTATGCACCTCATTGAAAGAACTT  
TCTTCCACTGACTTTAGCACTAGTTATTTGACACTTAGCGCTCCCTATTGCATTCGCT  
GGTCTCCCACCACAACACTATAAATGAACCCCTACATCTTGACTACTCTTATATTTGGTT  
TGGGCCTAGGAACAACACTTACGTTTGCAAGCTCACACTGACTCCTCGCTTGAATAG  
GCCTCGAAATTAATACACTAGCCATTATTCCGCTAATAGCCCAACATCATCACCCCC  
GAGCAGTCGAAGCTACTACTAAATACTTTCTCGCACAAAGCCACAGCAGCCGCTACCC  
TCTTGTTTGCAAGTACCACCAACGCATGACTAACAGGCCAATGAGACATCCAACAA  
ATAACACACCCCCCTCCCCACAACAATAATTGTTATTGCCCTAGCACTAAAAATTGGA  
CTAGCACCAATACACTCTTGACTTCCAGAAGTACTTCAAGGACTAGACCTTACCACC  
GGACTAATCCTCTCGACTTGACAAAAACTTGACCCCTTTGCCCTATTACTACAAATT  
CAAGCAACAACCCTACGCCTCTAATCATTATTGGTTTACTATCCACCCTCGTTGGGG  
GATGAGGTGGTCTCAATCAAACCTCAATTACGTAAAGTCCTGGCCTACTCCTCGATTG  
CCCATCTTGGCTGAATAATACTAATCATTTCAGTTTTACCCCTCCTCGCCCTCCTTGC  
CCTACTCACGTATTTTCTATGACTTTTTTCAGCATTCCTAATCTTTAAAGTAAACAAGG  
CTACCACTGTCAATGCCCTCGCAATCTCATGAACAAAAACCCCTGCCCTCACAGCCC  
TAGCACCCCTAGTCTTATTGTCCCTTGGTGGCCTCCCTCCCTTACCGGCTTCATACC  
CAAATGATTTATTCTTCAAGAGCTGACTAAGCAGGACCTCCCACCCTTGCTACCCTC  
GCCGCATTAACCTGCCCTCTTAAGCCTTTACTTCTACTTGCGCCTCTCGTACGCGATAA  
CCCTGACAATGTTCCCTAACAACCTCGTCGGCGTTACCCCTGACGGTTCTATTCTCC  
CCAATTTACGTTCCCTCGCCATGTCCACTGCAGCAACCACCCTTCTTCTCCCACTA  
GCCCCTGCTGCTGTAGCACTACTCATAGCTTATGAGCCTTCTTCTAACCATCATTTCA  
ATCGCCACCCTCCTCTCAACAGTACTTGCCATTGTATCCTTTTGACTCCCCCAAATTA  
CACCAGACCATGAAAAGCTATCACCATAACGAATGCGGCTTTGACCCGATAGGCTCT  
GCCCCGACTACCTTTTTTCGCTGCGATTTTTTCTCATCGCCATCCTCTTCTCCTGTTTCA  
CTTAGAGATTGCACTCCTCCTCCCCCTTCCCTGAGGAGACCAATTAGCATCGCCACT  
ACTCACATTCACTTGAGCTACAGCTGTCTAGCGCTTCTAACCCTTGGCCTCATTTAC  
GAATGAATGCAAGGAGGCCTAGAGTGAGCTGAATATGCTAAAAATCCTAATTCCAA  
CACTTATGCTAATCCCAACAGCCTGGTTACTCAAACCCAGCTGACTCTGGCCCATAA  
CCTTGATGTATAGCTTTTGCATCTCCTTAATTAGCCTTTCATGATTGAAGAACCTCTC  
AGAAACCGGCTGATCATCACTTAACCTCTTTATAGCCACCGACTCCCTATCAACCCC  
CCTCCTCGTTCTCACATGCTGACTGCTACCACTAATGATTTTGGCAAGCCAAAAACA  
CACAGCCTCAGAGCCTCTTGGTCGCCAGCGCATGTACATTACACTTCTCGCCTCCTC  
CAGTTCTTCTGATTCTAGCATTTAGCGCCACTGAGCTGGTAATGTTTTACGTAATAT  
TTGAAGCCACCCTCATCCCCACTCTGATTATTATTACCCGCTGAGGGAACCAACAG  
AACGCCTAAATGCAGGGACCTACTTTCTTTTTTACACATTGGCAGGCTCACTACCTCT  
TCTCGTTGCTTTACTTCTTCTCCAGAACACATCCGGCACCCCTGTCGTTGTTAACCTA  
CACTATACAGACCCACTCACTCTCATCTTATGCAGACAAATTATGATGAGCAGGCTG  
TCTCTTAGCATTCCTCGTTAAAATACCTCTCTATGGGGTCCACCTGTGACTCCCTAAA  
GCCCACGTTGAAGCCCCCATTGCAGGCTCAATGATCCTTGACGCGGTTCTCTTAAAA  
CTGGGAGGATATGGCATGATCCGCATAATAACAATATTAGAGCCTCTAACTAAGGA  
GCTAAGCTACCCCTTCATTGTCTTTGCACTTTGAGGGGTAATCATAACTGGCTCAATT  
TGTCTACGACAGACAGACCTTAAGTCCCTAATTGCCTACTCATCTGTAAGTCACATG  
GGCCTGGTGGCCGGGGGAATTCTTATTTCAGTCACCCTGGGGCTTAACAGGGGCCCTT

ACCCTAATAATTGCACACGGTCTTACCTCATCAGCCCTCTTCTGCCTAGCAAACACA  
AACTATGAACGAACCCACAGTCGAACGATAGTACTAGCACGAGGGCTTCAAGTAGC  
TCTACCATTGATGGCCACTTGATGATTTATTTCTAGCTTAGCCAACCTAGCCCTTCCA  
CCACTACCTAACCTCATAGGTGAACTAATAATTATTACTTCTCTATTCAACTGATCCT  
GGTGAACCTCTAGCATTAAACCGGGGCAGGCACTCTAATTACAGCTGGTTACTCCCTTT  
ATATGTTCTTAATAACTCAACGGGGGCTCTCCCAGCACATATCATTGCGCTTGAGC  
CATCTCACACCCGAGAACACCTCCTTATTGCCTTCATCTTATCCCCTTGATTCTCCTC  
GTGCTTAAGCCCGAGCTGATCTGAGGTTGGACTGCCTATGACCCCCACACACTTTGC  
CTTCTCCTCAGCCTTTCTTCTGGGTTTAACAGGCCTGGCATTTCACCGGTTCCACCTC  
CTTTCCGCTTTATTATGTCTTGAAGGAATAATATTATCCCTATTTATTGCCCTCTCCCT  
ATGGACACTCCAACCTTGACTCAACAACTTTTCAGCATCTCCTATGCTTCTACTTGCA  
TTTTCAGCCTGCGAAGCAAGCGCCGGCCTCGCCCTGCTAGTAGCCACTGCTCGAACC  
CACGGAACCGACCGACTACAAAGCCTAAATCTTCTCCAATGCTAAATGCACCCACC  
TCCCTAATGATTTTCGTCAAGCCTGATCACAATCTTTCGATTGCTAGCCTATCCCCTAG  
TCACCACAATACGACCCACGCCCCAAGAACCTCAGTGGGCTTCTACCCATGTTAAAA  
CAGCTGTAAAAATAGCTTTCTTTGTTAGTCTGTTACCCCTGACCCTATTTCTTAACGA  
GGGTGCCGAGACAATCGTTACTAACTGAACCTGAATAAATACTAACTCCTTCGACAT  
CAACATTAGCCTAAAATTTGACTTCTACTCAATTATTTTTACCCCCATTGCCCTCTAC  
GTAACCTGGTCCATCCTAGAATTTGCATTATGATACATGCATGCAGACCCGAACATG  
AACCGCTTCTTCAAGTATCTACTGACATTTCTGATTGCCATAATCGTTCTCGTAACCG  
CAAACAATATGTTTCAACTATTCATCGGTTGAGAGGGTGTGGGGATCATATCGTTCC  
TCCTTATCGGGTGGTGGTTCGGACGGGCGGATGCTAACACTGCAGCACTTCAAGCAG  
TACTTTACAACCGGGTTGGGGACATCGGTCTTATCTTCGCCATGGCTTGAATAGCAG  
CAAACCTGAACCTCCTGGGAAATGCAACAAATCTTTGTAACCTCCAAAGACATAGAC  
TTAACTTATCCTCTCCTCGGGCTCATCATCGCAGCAACCGGCAAGTCGGCTCAATTT  
GGTCTTCACCCCTGACTACCCTCCGCTATGGAGGGTCCTACACCGGTCTCTGCCCTA  
CTTCATTCTAGCACTATAGTCGTTGCCGGCATTTCCTGCTGGTCCGAATGAGCCCCC  
TCCTGGAAAACAACCAAACCTGCCCTCACAACCTGCCTGTGCCTCGGGGGCCCTTACAA  
CACTGTTTACTGCAACCTGTGCCCTCACACAAAATGATATTAATAAAAAATCGTCGCAT  
TCTCCACATCAAGCCAGCTTGGACTTATGATGGTAACCATTGGACTAAACCAACCAC  
AACTAGCGTTTCTTCACATTTGCACACACGCTTTCTTCAAGGCCATGCTATTTTTATG  
CTCCGGATCTATTATTCATAGTCTTAATGACGAACAAGACATCCGAAAAATAGGAG  
GCATACACCACCTTGCACCTTTTACATCCTCTTGCCCTAACTATTGGCAGTCTTGCCCT  
TACAGGGACCCCTTCTTAGCTGGCTTCTTCTCTAAAGATGCTATCATCGAAGCACT  
AAACACATCCCACCTAAACGCCTGAGCCCTAACTTTAACCCCTCCTAGCCACCTCTTT  
CACAGCAATTTACAGCTTTTCGAGTAGTATTTTTTTGTGCCCATGGGTACCCCCGGTTT  
AATCCCTCTCCCCCATCAACGAAAACAACCCAGCAGTGATTAACCCACTTAAGCGAT  
TAGCATGAGGAAGCATCGTTGCAGGCTTACTAATTACTTCTAACATCACACCCCTAA  
AAACCCCTGTTATATCTATACCCCTCTCCTTAAACTAGCTGCTCTTGCAGTAACAAT  
CCTTGGCCTACTTGTTGCTATGGAACCTCGCCATGCTAACTAATAAGCAATATAAATC  
AATACCCGACACAACGTACACCACTTCTCCACCTTGTTAGGCTTCTTCCCCGGAGTA  
ATGCACCGCCTAGCCCTAAATTACTCTTCTTCTAGGCCAAAACGTTGCCAACCAA  
ACAGTAGATCAAACCTGGCTAGAAAAAATCGGCCCAAAGCCATTGAGTCCTCTAA  
CCGACCCCTGATCTCTTCTACAAGTAACATTCAGCGAGGAGTAATCAAGACATATCT  
CCCCTTTTCTCCTAACACTAGCCCTTATAATCCCACTATTCATCGCCTAATGACTTT  
TGCTATATATTTAGTTTTATTTCTCTCGTGTTAGGGTTAGTTGCAGTTGCTTCTAATC  
CATCTCCTTATTTTCGCTGCTTTGGGTTTGGTTGTAGTAGCTGGGATGGGGTGTGGTAT  
ATTAGTTGGGCATGGGGGGCCTTTTTTGTCACTAGTTTTTGTCTTAATTTACTTGGGC

GGGATGCTAGTTGTATTTGCATACTCCGCAGCGTTAGCTGCTGAGCCGTATCCGGAG  
AGCTGGGGTAGTTGGTCGGTAATGGTTTATGGTAGTTTACACAGGAGGGGTAATGTA  
GTTTCTGGGCTGTTCTGAGGGGGGTGATACGAGTCGTCTTGGGTCCTAGCAGATGAG  
TTGGCGGAGTTCTCCGTGTTTCGGGGGGATATCGGAGGTGTAGCTTTAATATATTCT  
TCTGGGGGGGTGGTTATTAATTATTAGCGCGTGGGTATTGCTTTTAACTTTGTTTGTGG  
TTCTCGAGTTGACCGGGGTATAAGTCGAGGGGCGTTGCGGCAGTTT"/>

<sequence id="seq\_Reinhardtius\_hippoglossoides\_AM7491311"

spec="Sequence" taxon="Reinhardtius\_hippoglossoides\_AM749131" totalcount="4"

value="ATGATACTAAGCTTTTTTGACCAATTTATATCCCCAGTATACCTCGGTATTCC  
GCTAATTGCACTAGCAATTACCCTCCCCTGAATTCTGTTCCCAACCCCTCAAGCCGCT  
GATTAAACAACCGTGTGCTAACACTTCAAGGATGGTTTATTAGCCGCTTCACCTCAC  
AACTTCTTCTTCCCCTAAACCCCGGGGGCCACAAATGAGCAGTTTTATTTACCTCATT  
AATGTTTTTCTTTTCTATTAACATACTAGGACTCCTTCCATATACCTTCACACCAACA  
ACCCAATCTCCCTTAATATGGGCCTCGCAGTTCCCCTCTGATTAGCAACTGTCATTA  
TGGAATGCGAAATCAACCTACACATGCCCTAGGTCACCTCCTTCCAGAAGGCACCCC  
TACTGCTCTCATCCCTGTACTCATCATCATTGAAACAATTAGCCTATTTATTCGACCC  
CTCGCTCTCGGTGTTGCTAAACAGCGAATCTCACAGCAGGCCACCTCCTTATTCAA  
CTCATTGCAACAGCTGCCTTTGTCTTCTTCCGCTCATACTGTTGTTGCTATCTTAA  
CAACGGTGGTCCTCTTCTTCTTACTCTGCTAGAAGTCGCGGTGCGCATGATCCAAG  
CCTATGTCTTTGTTCTACTCTTAAGCCTATATCTACAAGAGAACGTTTAATGCCTCAA  
CTGAACCCCGCACCTGATTTGCAATTTTAGTTTTCTTGAATAATCTTTTTAACTG  
TTATTCCCCCAAAGTTTTAGCACATACTTACCCCAATGAACCTACCTCCCAAAGCA  
CACAAAAACAAAACAGAACCCTGAAACTGACCATGATACTAAGTGGCAATCACACG  
TTGATTTTTCTCGACCAATCACAAAGACATCGGCACCCTCTATCTCGTATTTGGTGCC  
TGAGCCGGTATAGTGGGAACAGGCCTAAGTCTGCTTATTCGGGCAGAACTAAGCCA  
ACCTGGGGCTCTCCTTGGAGACGACCAAATTTATAACGTAATCGTCACCGCACACGC  
CTTTGTAATAATCTTTTTTATAGTAATACCCATTATGATCGGGGGTTTCGGAACTGG  
CTTATTCCACTAATAATTGGAGCCCCAGATATGGCTTTCCTCGAATAAATAACATG  
AGTTTCTGACTTCTTCCCCCATCCTTCTTCTCCTCTTAGCCTCTTCAGGTGTTGAAGC  
TGGGGCAGGTACGGGGTGAACCGTTTATCCACCACTAGCTGGTAATCTGGCCACGC  
CGGAGCATCCGTTGACCTAACAATCTTCTCACTTCACCTTGCAGGGATTTGTCATTT  
CTGGGGGCAATTAACCTTATTACTACCATCATCAACATGAAACCCACAACAGTTACT  
ATGTACCAAATCCCATTATTTGTTTGGAGCCGTTCTAATTACCGCCGTAATCTTCTTC  
TGTCCCTTCCCGTCTTAGCCGCAGGGATTACAATGCTACTAACAGACCGCAACCTCA  
ACACAACCTTTTTTGACCCCGCCGGAGGTGGTGACCCCATCCTCTATCAACACCTAT  
TCTGATTCTTTGGCCACCCAGAGGTATATATTCTCATTCTTCCAGGCTTCGGAATAAT  
TTCCACATTGTTGCATACTATGCAGGTAAAAAAGAACCTTTTGGTTACATAGGAAT  
AGTCTGAGCTATAATAGCCATTGGACTCCTGGGATTCATTGTATGGGCCCATCACAT  
GTTTACAGTCGGGATAGACGTCGACACACGAGCCTACTTTACATCTGCCACAATAAT  
CATTGCAATCCCGACCGGCGTAAAAGTCTTTAGCTGACTCGCAACCCCTCCACGGGGG  
AAGCATCAAATGAGAAACGCCACTTCTTTGGGCCCTCGGCTTTATTTTCTCTTTACA  
GTAGGGGGTCTTACTGGCATTGTCTTGGCTAACTCCTCTCTTGACATTGTTCTGCATG  
ACACATACTATGTAGTAGCCCACTTCCACTATGTACTATCTATGGGTGCTGTATTTCG  
AATCGTTGCCGCCTTCGTCCACTGATTCCCACTATTTACAGGTTATACCTCCACTCC  
ACATGAACAAAAATCCACTTCGGCCTGATATTTATTGGGGTCAATCTAACATTCTTC  
CCCCAACACTTCCTGGGCCTAGCCGGAATGCCCCGACGATACTCAGACTACCCAGAC  
GCATATACCCTTTGAAACACTGTCTCATCAATCGGATCCCTAATGTGCTCGTCGCT  
GTAATCTTATTTTTGTTTATTATTTGAGAAGCATTTACAGCCAAACGAGAAGTTGGG

GCAGTAGAACTTACTGCAACTAACATCGAATGACTTTACGGCTGCCCTCCACCCTAC  
CACACATTTGAAGAGCCCCGCATTCGTCCAAGTTCGAATAAACTAAATGGCACATCCC  
TCACAACTCGGATTTCAAGACGCAGCTTCACCCTTAATAGAAGAACTACTTCACTTC  
CACGATCACGCCTTAATAATTGTAATTCTCATCAGCACGATAGTACTTTATATTATTG  
CGGCTATAGTTACAGCCAACTAACAGATAAACTTGTTCTAGATTCTCAAGAAATTG  
AAATTATCTGAACAGTTCTCCCAGCTGTTATTCTTATTCTCATCGCCCTACCATCTCT  
CCGAATTTTGTACTTAATAGACGAAATTAATGATCCCCACTTAACAATCAAAGCCAT  
GGGCCACCAGTGGTACTGAAGCTACGAATACACAGACTATGAAGACCTCGGTTTTG  
ACTCTTACATAATCCCTACACAAGACCTGACCCCTGGACAGTTCCGACTACTTGAAG  
CAGATCACCGGATAGTAATCCCGGTAGAATCTCCTATTTCGCGTTCTAATCTCAGCTG  
AAGATGTATTACATTCCTGAGCAGTCCCCTCCCTGGGCGTAAAAGTTGACGCCGTAC  
CTGGACGATTAAATCAAGCAACCTTTATTGTTAGCCGGCCAGGCGTATTTTATGGTC  
AATGCTCTGAAATTTGCGGAGCGAACCATAGTTTTATACCCATCGTTGTAGAAGCAG  
TCCCCCTTGAACACTTTGAAAACCTGGTCTTCACTAATAATTGAAGACGCCTATGGCC  
CATCAAGCACACCCATACCACATAGTCGACCCCAGTCCATGACCCCTCACGGGGGCT  
ATTGCTGCCCTATTGATAACATCTGGCCTTGCTATCTGATTTCACTTCCATTCCACAA  
CCCTTATAACTATTGGGACAGTCCTTCTCACCTTAACAATCTTCCAATGATGACGGG  
ACGTCGTACGAGAAGGCACATTTCAAGGACACCACACTCCCCCTGTTCAAATAGGC  
CTCCGATACGGAATAATCTTATTTATTACCTCAGAAGTTCTGTTCTTCTTAGGCTTCT  
TCTGAGCCTTTTACCACTCAAGCCTAGCACCTACTCCAGAACTAGGAGGCTTCTGAC  
CCCCAGCAGGCATTACCCCTTTAGACCCATTTGAAGTCCCGCTTCTTAACACAGCAG  
TCCTCCTTGCCCTCTGGTGTAACCTGTTACCTGAGCACATCACAGCATTATAGAGGGTA  
AACGGAAACAACTATTCAATCTCTTGCCCTCACAATCTTACTCGGGGGTTACTTCA  
CTTTTCTCCAAGGCCTTGAGTATGTGGAAGCCCCCTTCACCATTGCAGACGGAGTTT  
ACGGTGCTACATTCTTTGTTGCCACCGGCTTCCACGGCCTCCACGTCTTAATTGGCAC  
CTCATTCTTAGCCGTTTGTCTGTTACGCCAAATCCTTCACCATTTTACATCAAACCAC  
CACTTTGGGTTTGAAGCAGCCGCATGATACTGACACTTCGTAGACGTCGTCTGACTT  
TTCTCTATATCTCTATTTACTGATGAGGATCTTAATGGCCAGTCTACGTAAATCCCA  
CCCTCTTCTAAAAATCGCAAACGATGCTTTAGTTGACCTCCCAGCCCCCTCTAATATC  
TCGTTTTGGTGAACTTTGGGTCTCTTCTAGGACTCTGTTTAGTAACCCAAATTGCTA  
CCGGCTTGTTTCTAGCCATACACTATACATCAGATATTGCTACTGCCTTCACCTCCGT  
GGCTCACATCTGCCGGGACGTCAACTACGGCTGACTTATCCGAAGCATTTCATGCCAA  
CGGCGCATCATTCTTTTTCATTTGCATCTACCTACACATCGGCCGAGGACTCTACTAT  
GGCTCATACCTCTATAAAGAAACATGAACTATTGGAGTCGTCCTCCTCCTCCTCGTA  
ATAATAACGGCCTTCGTGCGGATACGTCCCTCCCTTGAGGACAAATGTCGTTTTGAGGT  
GCAACCGTTATTACCAACCTCCTATCCGCCGTCCCCTATGTTGGCAACACCCTAGTC  
CAATGGATTTGAGGTGGTTTTTCTGTAGACAATGCTACCCTTACCCGGTTCTTTGCCT  
TCCACTTCCTTTTCCCCTTCATCATCGCCGCCGCAACAGTAATTCATCTACTATTTCTT  
CACGAACTGGCTCAAATAATCCCACCGGCTTAACTCAGACTCAGACAAGGTTC  
CTTCCACCCTTACTTCACTTACAAAGACCTCTTGGTTTTTGCAGTGCTCCTCACTGCAT  
TAGCATCCCTCGCTTTGTTTTACCTAATCTTTTAGGAGACCCAGATAACTTTACCCC  
CGCAAATCCACTTGTTACACCCCCACACATTAAACCAGAGTGATACTTCTCTTTGC  
TTACGCTATTCTCCGGTCCATCCCAAACAACTTGAGAGGCGTTCTTGCCCTTTTATTT  
TCGATCTTAGTTCTCATGCTTGTCCTTTCCTTCACACCTCTAAACAACGCAGCCTAA  
TGTTCCGCCCTCTAACGCAATTTTTGTTCTGGTCTCTGGTAGCAGACGTTATAATTCT  
AACTTGAATTGGAGGAATGCCCCGTAGAACACCCCTTCGTTATCATTGGACAAGTAGC  
ATCACTCCTTTACTTCGCCCTCTTTCTGGTCTGATCCCAACAGCAGGTTTACTAGAG  
AATAAAGTCCTTGGAATGAAAATATGATTTCAACTCTCATTACCCATATTATTAACCC

CCTAACCTTTATTGTACCTGTATTGCTAGCCGTAGCATTCCTCACCTCCTTGAACGA  
AAAGTCCTAGGCTACATACTCCGAAAAGGGCCTAACATCGTAGGGCCTTACGG  
CCTCCTTCAACCCATTGCTGACGGCGTAAACTCTTTATTAAAGAACCCGTTTCGGCC  
TTCCACCGCATCCCCGTTCTGTTCTCTGGCCCCCTATACTCGCACTCACACTGGCC  
CTGACCCTTTGAGCCCCGATGCCTTTCCCGTACCCTGTTGTGGACCTTAACCTGGGTA  
TCCTTTTTTATTCTAGCACTATCTAGCCTTGCAGTATACTCTATTCTTGGGTCTGGTTG  
AGCATCCAATTCAAAATACGCTTTAGTAGGAGCACTGCGGGCTGTTGCACAAACAA  
TTTCTTACGAAGTTAGCCTAGGACTCATCCTCCTTAACATCATCATCTTTACCGGAGG  
ATTTACACTTCAGACCTTTAACACGGCCCAAGAGGCCATCTGACTAGTTGTACCCGC  
CTGACCCCTCGCTGCCATATGATACATCTCCACTCTTGCCGAAACAAACCGTGCACC  
CTTCGACCTAACAGAGGGGGAATCTGAACTTGTTTCAGGCTTCAACGTAGAATACGC  
AGGAGGGCCCTTCGCTTTGTTCTTTTTAGCCGAATACTCAAATATCCTCCTAATAAAT  
ACTCTGTCCGCAACATTATTTTTGGGCGCCTCCCACATTCCCTCTATCCCAGAATTAA  
CTAGCATTAATATTATAACTAAAGCAGCCCTTCTCTCAATTGTTTTTCTGTGAGTCCG  
AGCTTCGTACCCGCGATTCCGTTACGACCAACTTATGCACCTCATTGAAAGAACTT  
TCTTCCACTGACTTTAGCACTAGTTATTTGACACTTAGCGCTCCCTATTGCATTCGCT  
GGTCTCCCACCACAACATAAATGAACCCCTACATCTTGACCCTCTTATATTTGGTT  
TGGGCCTAGGAACAACACTTACGTTTGCAAGCTCACACTGACTCCTCGCTTGAATAG  
GCCTCGAAATTAATACTAGCCATTATTCCACTAATAGCCCAACATCATCACCCCC  
GAGCAGTCGAAGCTACTACTAAATACTTTCTCGCACAAGCCACAGCAGCCGCTACCC  
TCTTGTTTGCAAGTACCACCAACGCATGACTAACAGGCCAATGAGACATCCAACAA  
ATAACACACCCCCCTCCCCACAACAATAATTGTTATTGCCCTAGCACTAAAAATTGGA  
CTAGCACCAATACACTCTTGACTTCCAGAAGTGCTTCAAGGACTAGACCTCACCACC  
GGACTTATCCTCTCGACTTGACAAAACTTGACCCCTTTGCCCTATTACTACAAATTC  
AAGCAACAACCCTACGCCTCTAATCATTATTGGCTTGCTATCCACCCTCGTTGGAGG  
ATGAGGTGGTCTCAATCAAACCTCAATTACGTAAAGTCCTCGCCTACTCCTCGATTGC  
CCATCTTGGCTGAATAATACTAATCATTGAGTTTTACCCCTCCTCGCCCTCCTTGCC  
CTACTCACGTATTTTCTATGACTTTTTTCAGCATTCTAATCTTTAAAGTAAACAAGGC  
TACCCTGTCAATGCCCTCGCAATCTCATGAACAAAAACCCCTGCCCTCACAGCCCT  
AGCACCCCTAGTCTTATTGTCCCTTGGTGGCCTCCCTCCCCTTACCGGCTTCATACCC  
AAATGATTTATTCTTCAAGAACTGACTAAGCAAGACCTCCCACCCTTGCTACCCTCG  
CCGCATTAACCTGCCCTCTTAAGCCTTTACTTCTACTTGCGCCTCTCGTACGCGATAAC  
CCTGACAATGTTCCCTAACAACCTCGTCGGCGTTACCCCTGACGGTTCTATTCTCCC  
CAATTTACGCTTCCCCTCGCCATGTCCACTGCAGCAACCACCCTTCTTCTCCCACTAG  
CCCCTGCTGCTGTAGCACTACTCATAGCTTATGAGCCTTCTTCTAACCATCATTTCAA  
TCGCCACCCTCCTCTCAACAGTACTTGCCATTGTATCCTTTTGACTCCCCCAAATTAC  
ACCAGACCATGAAAAGCTATCACCATACGAATGCGGCTTTGACCCGATAGGCTCTG  
CCCGACTACCTTTTTTCGCTGCGATTTTTTCTCATCGCCATCCTCTTTCTCCTGTTGAC  
TTAGAGATTGCACTCCTCCTCCCCCTTCCCTGAGGAGACCAATTAGCATCGCCACTA  
CTCACATTCACTTGAGCTACAGCTGTCCTAGCGCTTCTAACCCTTGGCCTCATTTACG  
AATGAATGCAAGGAGGCCTAGAGTGAGCTGAATATGCTAAAAATCCTAATTCCAAC  
ACTTATGCTAATCCCAACAGCCTGGTTACTCAAACCCAGCTGACTCTGGCCCATAAC  
CTTGATGTATAGCTTTTGCATCTCCTTAATTAGCCTTTCATGATTGAAGAACCCTCTCA  
GAAACCGGCTGATCATCACTTAACCTCTTTATAGCCACCGACTCCCTATCAACCCCC  
CTCCTCGTTCTCACATGCTGGCTGCTACCACTAATGATTTTGGCAAGCCAAAAACAC  
ACAGCCTCAGAGCCTCTTGGTCGCCAGCGCATGTACATTACACTTCTCGCCTCCTCC  
AGTTCTTCCTGATTCTAGCATTTAGCGCCACTGAGCTGGTAATGTTTTACGTAATATT  
TGAAGCCACCCTCATCCCCACTCTGATTATTATTACCCGCTGAGGGAACCAAACAGA



ACGCCTAAATGCAGGGACCTACTTTCTTTTTTACACATTGGCAGGCTCACTACCCCTT  
CTCGTTGCTTTACTTCTTCTCCAGAACACATCCGGCACCCCTGTCGTTGCTAACCCTAC  
ACTATACAGACCCCACTCACTCTCATCTTATGCAGACAAATTATGATGAGCAGGCTGT  
CTCTTAGCATTCCTCGTTAAAATACCTCTCTATGGAGTCCACCTGTGACTCCCTAAAG  
CCCACGTTGAAGCCCCCATTGCAGGCTCAATGATCCTTGCAGCGGTTCTCTTAAAC  
TGGGAGGATATGGCATGATCCGCATAATAACAATATTAGAGCCTCTAACTAAGGAG  
CTAAGCTACCCCTTCATTGTCTTTGCACTTTGGGGGGTAATCATAACTGGCTCAATTT  
GTCTACGACAGACAGACCTTAAGTCCCTAATTGCCTACTCATCTGTAAGTCACATGG  
GCCTAGTGGCCGGGGGAATTCTTATTCAGTCACCCTGGGGCTTAACAGGGGGCCCTTA  
CCCTAATAATTGCACACGGTCTTACCTCATCAGCCCTCTTCTGCCTAGCAAACACAA  
ACTATGAACGAACCCACAGTCGAACGATAGTACTAGCACGAGGGCTTCAAGTAGCT  
CTACCATTGATGGCCACTTGATGATTTATTTCTAGCTTAGCCAACCTAGCCCTTCCAC  
CACTACCTAACCTCATAGGTGAACATAATAATTACTTCTCTATTCAACTGATCCTG  
GTGAACTCTAGCATTAAACCGGGGCAGGCACTCTAATTACAGCTGGTTACTCCCTTTA  
TATGTTCTTAATAACTCAACGGGGACCTCTCCCAGCACATATCATTGCGCTTGAGCC  
ATCTCACACCCGAGAACACCTCCTTATTGCCTTCATCTTATCCCCTTGATTCTCCTCG  
TGCTTAAGCCCGAGCTGATCTGAGGTTGGACTGCCTATGACCCCCACACACTTTGCC  
TTCTCCTCAGCCTTTCTTCTGGGTTTAACAGGCCTGGCATTTCACCGGTTCCACCTCC  
TTTCCGCTTTATTATGTCTTGAAGGAATAATACTATCCCTATTTATTGCCCTCTCCCT  
ATGAACACTCCAACCTTGACTCAACAACTTTTCAGCATCTCCTATGCTTCTACTTGCA  
TTTTCAGCCTGCGAAGCAAGCGCCGGCCTCGCCCTGCTAGTAGCCACTGCTCGAACC  
CACGGAACCGACCGACTACAAAGCCTAAATCTTCTCCAATGCTAAATGCACCCACC  
TCCCTAATGATTTTCGTCAAGCCTGATCACAATCTTTGCATTGCTAGCCTATCCCCTAG  
TCACCACAATACGACCCACGCCCCAAGAACCTCAGTGGGCTTCTACCCATGTTAAAA  
CAGCTGTAAAAATAGCTTTCTTTGTTAGTCTGTTACCCCTGACCTATTTCTTAATGA  
GGGTGCCGAGACAATCGTTACTAACTGAACCTGAATAAATACTAACTCCTTCGACAT  
CAACATTAGCCTAAAATTTGACTTCTACTCAATTATTTTTTACCCCCATTGCCCTCTAC  
GTAACCTGGTCCATCCTAGAATTTGCATTATGATACATGCATGCAGACCCAAACATA  
AACCGCTTCTTCAAGTATCTACTGACATTTCTGATTGCCATAATCGTTCTCGTAACCG  
CAAACAATATGTTTCAACTATTCATCGGTTGAGAGGGTGTGGGGATCATATCGTTCC  
TCCTTATCGGGTGGTGGTTCGGACGGGCGGATGCTAACACTGCAGCACTTCAAGCAG  
TACTTTATAACCGAGTTGGGGACATCGGTCTTATCTTCGCCATGGCTTGAATAGCAG  
CAAACCTAAACTCCTGGGAAATGCAACAAATCTTTGTAACCTCCAAAGACATAGAC  
TTAACTTATCCTCTCCTCGGGCTCATCATCGCAGCAACCGGCAAGTCGGCTCAATTT  
GGTCTTCACCCCTGACTACCCTCCGCTATGGAGGGTCTACACCGGTCTCTGCCCTA  
CTTCATTCTAGCACTATAGTCGTTGCCGGCATTTCCTGCTGGTCCGAATGAGCCCCC  
TCCTGGAAAACAACCAAACCTGCCCTCACAACCTGCCTGTGCCTCGGGGGCCCTTACAA  
CACTGTTTACTGCAACCTGTGCCCTCACACAAAATGATATTAAAAAAATCGTCGCAT  
TCTCCACATCAAGCCAGCTTGGACTTATGATGGTAACCATCGGACTAAACCAACCAC  
AACTAGCGTTTCTTCACATTTGCACACACGCTTTCTTCAAGGCCATACTATTTTTATG  
CTCCGGATCTATTATTCATAGTCTTAATGACGAACAAGACATCCGAAAAATAGGAG  
GCATACACCACCTTGCGCCTTTTACATCCTCTTGCCCTAACTATTGGCAGTCTTGCCCT  
TACAGGGGGCCCCCTTCTTAGCTGGCTTCTTCTCTAAAGATGCTATCATCGAAGCACT  
AAACACATCCCACCTAAACGCCTGAGCCCTAACTTTAACCCCTCCTAGCCACCTCTTT  
CACAGCAATTTACAGCTTTCGAGTAGTATTTTTTGTGCCCATGGGTACCCCCGGTTT  
AATCCCTCTCCCCCATCAACGAAAATAACCCAGCAGTGATTAACCCACTTAAGCGAT  
TAGCATGAGGAAGCATCGTTGCAGGCTTACTAATTACTTCTAACATTACACCCCTAA  
AAACCCCTGTTATATCTATACCCCTCTCCTTAAACTAGCTGCTCTTGCAGTAACAAT

CCTTGGCCTACTTGTTGCTATGGAACCTCGCCATGCTAACTAATAAGCAATATAAATC  
AATACCCGACACAACGTACACCCTTCTCCACCTTGTTAGGCTTCTTCCCCGGAGTA  
ATGCACCGCCTAGCCCCTAAATTACTCTTCTTCTAGGCCAAAACGTTGCCAACCAA  
ACAGTAGATCAAACCTGGCTAGAAAAAATCGGCCCCAAAGCCATTGAGTCCTCTAA  
CCGACCCCTGATCTCTTCTACAAGTAACATTCAGCGAGGAGTAATCAAGACATATCT  
CCCCTTTTCTCCTGACACTAGCCCTTATAATCCCCTATTTCATCGCCTAATGACTTT  
TGCTATATATTTAGTTTTATTTTCTCTCGTGTTAGGGTTAGTTGCAGTTGCTTCTAATC  
CATCTCCTTATTTTCGCTGCTTTGGGTTTGGTTGTAGTAGCTGGGATGGGGTGTGGTAT  
ATTAGTTGGGCATGGGGGGCCTTTTTTGTCACTAGTTTTTGTCTTAATTTACTTGGGT  
GGGATGCTAGTTGTATTTGCATACTCCGCAGCGTTAGCTGCTGAGCCGTATCCGGAG  
AGCTGGGGTAGTTGGTCGGTAATGGTTTATGGTAGTTTATACAGGAGGGGTAATGTA  
GTTTCTGGGCTGTTCTGAGGGGGGTGATACGAGTCGTCTTGGGTCCTAGCAGATGAG  
TTGGCGGAGTTCTCCGTGTTTCGGGGGGATATCGGAGGTGTAGCCTTAATATATTCT  
TCTGGGGGGTGGTTATTAATTATTAGTGCCTGGGTATTGCTTTTAACTTTGTTTGTGG  
TTCTCGAGTTGACCGGGGTATAAGTCGAGGGGCGTTGCGGCAGTTT"/>

<sequence id="seq\_Reinhardtius\_hippoglossoides\_AM7491321"

spec="Sequence" taxon="Reinhardtius\_hippoglossoides\_AM749132" totalcount="4"

value="ATGATACTAAGCTTTTTTGACCAATTTATATCCCCAGTATACCTCGGTATTCC  
GCTAATTGCACTAGCAATTACCCTCCCCTGAATTCTGTTCCCAACCCCTCAAGCCGCT  
GATTAAACAACCGTGTGCTAACACTTCAAGGATGGTTTATTAGCCGCTTCACCTCAC  
AACTTCTTCTTCCCCTAAACCCCGGGGGGCCACAAATGAGCAGTTTTATTACCTCATT  
AATGTTTTTCTTTTCTATTAACATACTAGGACTCCTTCCATATACCTTCACACCAACA  
ACCAACTCTCCCTTAATATGGGCCTCGCAGTTCCCCTCTGATTAGCAACTGTCATTA  
TGGAATGCGAAATCAACCTACACATGCCCTAGGTCACCTCCTTCCAGAAGGCACCCC  
TACTGCTCTCATCCCTGTACTCATCATCATTGAAACAATTAGCCTATTTATTCGACCC  
CTCGCTCTCGGTGTTGACTAACAGCGAATCTCACAGCAGGCCACCTCCTTATTCAA  
CTCATTGCAACAGCTGCCTTTGTCTTCTTCCGCTCATACTGTTGTTGCTATCTTAA  
CAACGGTGGTCCTCTTCCCTTCTTACTCTGCTAGAAGTCGCGGTGCGCATGATCCAAG  
CCTATGTCTTTGTTCTACTCTTAAGCCTATATCTACAAGAGAACGTTTAATGCCTCAA  
CTGAACCCCGCACCCCTGATTTGCAATTTTAGTTTTCTCTTGAATAATCTTTTTAACTG  
TTATTCCCCCAAAGTTTTAGCACATACTTACCCCAATGAACCTACCTCCCAAAGCA  
CACAAAAACAAAACAGAACCCTGAAACTGACCATGATACTAAGTGGCAATCACACG  
TTGATTTTTCTCGACCAATCACAAAGACATCGGCACCCTCTATCTCGTATTTGGTGCC  
TGAGCCGGTATAGTGGGAACAGGCCTAAGTCTGCTTATTCGGGCAGAACTAAGCCA  
ACCTGGGGCTCTCCTTGGAGACGACCAAATTTATAACGTAATCGTCACCGCACACGC  
CTTTGTAATAATCTTTTTTATAGTAATACCCATTATGATCGGGGGTTTCGGAAACTGG  
CTTATTCCACTAATAATTGGAGCCCCAGATATGGCTTTCCCTCGAATAAATAACATG  
AGTTTCTGACTTCTTCCCCCATCCTTTCTTCTCCTCTTAGCCTCTTCAGGTGTTGAAGC  
TGGGGCAGGTACGGGGTGAACCGTTTATCCACCACTAGCTGGTAATCTGGCCACGC  
CGGAGCATCCGTTGACCTAACAATCTTCTCACTTCACCTTGCAGGGATTTCGTCAATT  
CTGGGGGCAATTAACCTTTATTACTACCATCATCAACATGAAACCCACAACAGTTACT  
ATGTACCAAATCCCATTATTTGTTTGAGCCGTTCTAATTACCGCCGTACTTCTTCTTC  
TGTCCCTTCCCGTCTTAGCCGCAGGGATTACAATGCTACTAACAGACCGCAACCTCA  
ACACAACCTTTTTTGACCCCGCCGGAGGTGGTGACCCCATCCTCTATCAACACCTAT  
TCTGATTCTTTGGCCACCCAGAGGTATATATTCTCATTCTTCCAGGCTTCGGAATAAT  
TTCCACATTGTTGCATACTATGCAGGTAAAAAAGAACCTTTTGGTTACATAGGAAT  
AGTCTGAGCTATAATAGCCATTGGACTCCTGGGATTCAATTGTATGGGCCCATCACAT  
GTTTACAGTCGGGATAGACGTGCACACAGAGCCTACTTTACATCTGCCACAATAAT

CATTGCAATCCCGACCGGCGTAAAAGTCTTTAGCTGACTCGCAACCCTCCACGGGGG  
AAGCATCAAATGAGAAACGCCACTTCTTTGGGCCCTCGGCTTTATTTTCTCTTTACA  
GTAGGGGGTCTTACTGGCATTGTCTTGGCTAACTCCTCTCTTGACATTGTTCTGCATG  
ACACATACTATGTAGTAGCCCACTTCCACTATGTACTATCTATGGGTGCTGTATTCGC  
AATCGTTGCCGCCTTCGTCCACTGATTCCCCTACTTTACAGGTTATACCCTCCACTCC  
ACATGAACAAAAATCCACTTCGGCCTGATATTTATTGGGGTCAATCTAACATTCTTC  
CCCCAACACTTCCTGGGCCTAGCCGGAATGCCCCGACGATACTCAGACTACCCAGAC  
GCATATACCCTTTGAAACACTGTCTCATCAATCGGATCCCTAATGTCGCTCGTCGCT  
GTAATCTTATTTTTGTTCATTATTTGAGAAGCATTTACAGCCAAACGAGAAGTTGGG  
GCAGTAGAACTTACTGCAACTAACATCGAATGACTTTACGGCTGCCCTCCACCCTAC  
CACACATTTGAAGAGCCCGCATTCGTCCAAGTTCGAATAAACTAAATGGCACATCCC  
TCACAACCTCGGATTTCAAGACGCAGCTTCACCCTTAATAGAAGAACTACTTCACTTC  
CACGATCACGCCTTAATAATTGTAATTCTCATCAGCACGATAGTACTTTATATTATTG  
CGGCTATAGTTACAGCCAACTAACAGATAAACTTGTTCTAGATTCTCAAGAAATTG  
AAATTATCTGAACAGTTCTCCCAGCTGTTATTCTTATTCTCATCGCCCTACCATCTCT  
CCGAATTTTGTACTTAATAGACGAAATTAATGATCCCCACTTAACAATCAAAGCCAT  
GGGCCACCAGTGGTACTGAAGCTACGAATACACAGACTATGAAGACCTCGGTTTTG  
ACTCTTACATAATCCCTACACAAGACCTGACCCCCGGACAGTTCCGACTACTTGAAG  
CAGATCACCGGATAGTAATCCCGGTAGAATCTCCTATTTCGCGTTCTAATCTCAGCTG  
AAGATGTATTACATTCCTGAGCAGTCCCCTCCCTGGGCGTAAAAGTTGACGCCGTAC  
CTGGACGATTAAATCAAGCAACCTTTATTGTTAGCCGGCCAGGCGTATTTTATGGTC  
AATGCTCTGAAATTTGCGGAGCGAACCATAGTTTTTATACCCATCGTTGTAGAAGCAG  
TCCCCCTTGAACACTTTGAAAACCTGGTCTTCACTAATAATTGAAGACGCCTATGGCC  
CATCAAGCACACCCATACCACATAGTCGACCCCAGTCCATGACCCCTCACGGGGGCT  
ATTGCTGCCCTATTGATAACATCTGGCCTTGCTATCTGATTTCACTTCCATTCCACAA  
CCCTTATACTATTGGGACAGTCCTTCTCACCTTAACAATCTTCCAATGATGACGGG  
ACGTCGTACGAGAAGGCACATTTCAAGGACACCACACTCCCCCTGTTCAAATAGGC  
CTCCGATACGGAATAATCTTATTTATTACCTCAGAAGTTCTGTTCTTCTTAGGCTTCT  
TCTGAGCCTTTTACCACTCAAGCCTAGCACCTACTCCAGAACTAGGAGGCTTCTGAC  
CCCCAGCAGGCATTACCCCTTTAGACCCATTTGAAGTCCCGCTTCTTAACACAGCAG  
TCCTCCTTGCCCTCTGGTGTAACCTGTTACCTGAGCACATCACAGCATTATAGAGGGTA  
AACGGAAACAACTATTCAATCTCTTGCCCTCACAATCTTACTCGGGGGTTACTTCA  
CTTTTCTCCAAGGCCTTGAGTATGTCGAAGCCCCCTTACCATTGCAGACGGAGTTT  
ACGGTGCTACATTCTTTGTTGCCACCGGCTTCCACGGCCTCCACGTCTTAATTGGCAC  
CTCATTCTTAGCCGTTTGTCTGTTACGCCAAATCCTTACCATTTTACATCAAACCAC  
CACTTTGGGTTTGAAGCAGCCGCATGATACTGACACTTCGTAGACGTCGTCTGACTT  
TTCCTCTATATCTCTATTTACTGATGAGGATCTTAATGGCCAGTCTACGTAAATCCCA  
CCCTCTTCTAAAAATCGCAAACGATGCTTTAGTTGACCTCCCAGCCCCCTCTAATATC  
TCCGTTTGGTGAACTTTGGGTCTCTTCTAGGACTCTGTTTAGTAACCCAAATTGCTA  
CCGGCTTGTTTCTAGCCATACACTATACATCAGATATTGCTACTGCCTTCACCTCCGT  
GGCTCACATCTGCCGGGACGTCAACTACGGCTGACTTATCCGAAGCATTATGCCAA  
CGGCGCATCATTCTTTTTCAATTTGCATCTACCTACACATCGGCCGAGGACTCTACTAT  
GGCTCATACCTCTATAAAGAAACATGAACTATTGGAGTCGTCTCTCCTCCTCCTCGTA  
ATAATAACGGCCTTCGTTCGGATACGTCCCTCCCTTGAGGACAAATGTCGTTTTGAGGT  
GCAACCGTTATTACCAACCTCCTATCCGCCGTCCCCTATGTTGGCAACACCCTAGTC  
CAATGGATTTGAGGTGGTTTTTCTGTAGACAATGCTACCCTTACCCGGTTCTTTGCCT  
TCCACTTCCTTTTCCCCTTCATCATCGCCGCCGCAACAGTAATTCATCTACTATTTCTT  
CACGAACTGGCTCAAATAATCCCACCGGCTTAACTCAGACTCAGACAAGGTTC

CTTCCACCCTTACTTCACTTACAAAGACCTCTTGGTTTTGCAGTGCTCCTCACTGCAT  
TAGCATCCCTCGCTTTGTTTTACCTAATCTTTTAGGAGACCCAGATAACTTTACCCC  
CGCAAATCCACTTGTTACACCCCCACACATTAAACCAGAGTGATACTTCCTCTTTGC  
TTACGCTATTCTCCGGTCCATCCCAAACAACTTGAGGGCGTTCTTGCCCTTTTATTT  
TCGATCTTAGTTCTCATGCTTGTCCCCTTCCTTCACACCTCTAAACAACGCAGCCTAA  
TGTTCCGCCCTCTAACGCAATTTTTGTTCTGGTCTCTGGTAGCAGACGTTATAATTCT  
AACTTGAATCGGAGGAATGCCCCGTAGAACACCCCTTCGTTATCATTGGACAAGTAGC  
ATCACTCCTTTACTTCGCCCTCTTTCTAGTCCTGATCCCAACAGCAGGTTTACTAGAG  
AATAAAGTCCTTGGAATGAAAATATGATTTCAACTCTCATTACCCATATTATTAACCC  
CCTAACCTTTATTGTACCTGTATTGCTAGCCGTAGCATTCTCACCCTCCTTGAACGG  
AAAGTCCTAGGCTACATACTCCGAAAAGGGCCTAACATCGTAGGGCCTTACGG  
CCTCCTTCAACCCATTGCTGACGGCGTAAAACTCTTTATTAAAGAACCCGTTTCGGCC  
TTCCACCGCATCCCCCGTTCTGTTCCCTCTGGCCCCCTATACTCGCACTCACACTGGCC  
CTAACCCCTTTGAGCCCCGATGCCTTTCCCGTACCCTGTTGTGGACCTTAACCTCGGTA  
TCCTTTTTATTCTAGCACTATCTAGCCTTGCAGTATACTCTATTCTTGGGTCTGGTTG  
AGCATCCAATTCAAAATACGCTTTAGTAGGAGCACTGCGGGCTGTTGCACAAACAA  
TTTCTTACGAAGTTAGCCTAGGACTCATCCTCCTTAACATCATCATCTTTACCGGAGG  
ATTTACACTTCAGACCTTTAACACGGCCCAAGAGGCCATCTGACTAGTTGTACCCGC  
CTGACCCCTCGCTGCCATATGATACATCTCCACTCTTGCCGAAACAAACCGTGCACC  
CTTCGACCTAACAGAGGGGGAATCTGAACTTGTTTCAGGCTTCAACGTAGAATACGC  
AGGAGGGGCCCTTCGCTTTGTTCTTTTTAGCCGAATACTCAAATATCCTCCTAATAAAT  
ACCCTGTCCGCAACATTATTTTTGGGGCGCCTCCCACATTCCCTCTATCCCAGAATTAA  
CTAGCATTAATATTATAACTAAAGCAGCCCTTCTCTCAATTGTTTTTCTGTGAGTCCG  
AGCTTCGTACCCGCGATTCCGTTACGACCAACTTATGCACCTCATTTGAAAGAACTT  
TCTTCCACTGACTTTAGCACTAGTTATTTGACACTTAGCGCTCCCTATTGCATTCGCT  
GGTCTCCCACCACAACATAAATGAACCCCTACATCTTGACCCTCTTATATTTGGTT  
TGGGCCTAGGAACAACACTTACGTTTGCAAGCTCACACTGACTCCTCGCTTGAATAG  
GCCTCGAAATTAATACACTAGCCATTATTCCACTAATAGCCCAACATCATCACCCCC  
GAGCAGTCGAAGCTACTACTAAATACTTTCTCGCACAAGCCACAGCAGCCGCTACCC  
TCTTGTTTGCAAGTACCACCAACGCATGACTAACAGGCCAATGAGACATCCAACAA  
ATAACACACCCCCCTCCCCACAACAATAATTGTTATTGCCCTAGCACTAAAAATTGGA  
CTAGCACCAATACACTCTTGACTTCCAGAAGTGCTTCAAGGACTAGACCTCACCACC  
GGACTTATCCTCTCGACTTGACAAAACTTGACCCCTTTGCCCTATTACTACAAATTC  
AAGCAACAACCCTACGCCTCTAATCATTATTGGCTTGCTATCCACCCTCGTTGGAGG  
ATGAGGTGGTCTCAATCAAACCTCAATTACGTAAAGTCCTCGCCTACTCCTCGATTGC  
CCATCTTGGCTGAATAATACTAATCATTACGTTTTACCCCTCCTCGCCCTCCTTGCC  
CTACTCACGTATTTTCTATGACTTTTTTCAGCATTCTTAATCTTTAAAGTAAACAAGGC  
TACCACTGTCAATGCCCTCGCAATCTCATGAACAAAAACCCCTGCCCTCACAGCCTT  
AGCACCCCTAGTCTTATTGTCCCTTGGTGGCCTCCCTCCCCTTACCGGCTTCATACCC  
AAATGATTTATTCTTCAAGAGCTGACTAAGCAAGACCTCCCACCCTTGCTACCCTCG  
CCGCATTAACCTGCCCTCTTAAGCCTTTACTTCTACTTGCGCCTCTCGTACGCGATAAC  
CCTGACAATGTTCCCTAACAACTCGTCGGCGTTACCCCTGACGGTTCTATTCTCCC  
CAATTTACGCTTCCCCTCGCCATGTCCACTGCAGCAACCACCCTTCTTCTCCCACTAG  
CCCCTGCTGCTGTAGCACTACTCATAGCTTATGAGCCTTCTTCTAACCATCATTTCAA  
TCGCCACCCTCCTCTCAACAGTACTTGCCATTGTATCCTTTTGACTCCCCCAAATTAC  
ACCAGACCATGAAAAGCTATCACCATACGAATGCGGCTTTGACCCGATAGGCTCTG  
CCCGACTACCTTTTTCGCTGCGATTTTTTCTCATCGCCATCCTCTTTCTCCTGTTGAC  
TTAGAGATTGCACTCCTCCTCCCCCTTCCCTGAGGAGACCAATTAGCATCGCCACTA

CTCACATTCACTTGAGCTACAGCTGTCCTAGCGCTTCTAACCCTTGGCCTCATTACG  
AATGAATGCAAGGAGGCCTAGAGTGAGCTGAATATGCTAAAAATCCTAATTCCAAC  
ACTTATGCTAATCCCAACAGCCTGGTACTCAAACCCAGCTGACTCTGGCCCATAAC  
CTTGATGTATAGCTTTTGCATCTCCTTAATTAGCCTTTCATGATTGAAGAACCTCTCA  
GAAACCGGCTGATCATCACTTAACCTCTTTATAGCCACCGACTCCCTATCAACCCCC  
CTCCTCGTTCTCACATGCTGACTGCTACCACTAATGATTTTGGCAAGCCAAAAACAC  
ACAGCCTCAGAGCCTCTTGGTCGCCAGCGCATGTACATTACACTTCTCGCCTCCTCC  
AGTTCTTCCTGATTCTAGCATTTAGCGCCACTGAGCTGGTAATGTTTTACGTAATATT  
TGAAGCCACCCTCATCCCCACTCTGATTATTATTACCCGCTGAGGGAACCAAACAGA  
ACGCCTAAATGCAGGGACCTACTTTCTTTTTTACACATTGGCAGGCTCACTACCCCTT  
CTCGTTGCTTTACTTCTTCTCCAGAACACATCCGGCACCCCTGTCGTTGCTAACCCCTAC  
ACTATACAGACCCACTCACTCTCATCTTATGCAGACAAATTATGATGAGCAGGCTGT  
CTCTTAGCATTCCTCGTTAAAATACCTCTCTATGGAGTCCACCTGTGACTCCCTAAAG  
CCCACGTTGAAGCCCCCATTGCAGGCTCAATGATCCTTGCAGCGGTTCTCTTAAAC  
TGGGAGGATATGGCATGATCCGCATAATAACAATATTAGAGCCTCTAACTAAGGAG  
CTAAGCTACCCCTTCATTGTCTTTGCACTTTGGGGGGTAATCATAACTGGCTCAATTT  
GTCTACGACAGACAGACCTTAAGTCCCTAATTGCCTACTCATCTGTAAGTCACATGG  
GCCTAGTGGCCGGGGGAATTCTTATTCAGTCACCCTGGGGCTTAACAGGGGGCCCTTA  
CCCTAATAATTGCACACGGTCTTACCTCATCAGCCCTCTTCTGCCTAGCAAACACAA  
ACTATGAACGAACCCACAGTCGAACGATAGTACTAGCACGAGGGCTTCAAGTAGCT  
CTACCATTGATGGCCACTTGATGATTTATTTCTAGCTTAGCCAACCTAGCCCTTCCAC  
CACTACCTAACCTCATAGGTGAACCTAATAATTATTACTTCTCTATTCAACTGATCCTG  
GTGAACCTTAGCATTAACCGGGGCAGGCACTCTAATTACAGCTGGTTACTCCCTTTA  
TATGTTCTTAATAACTCAACGGGGACCTCTCCCAGCACATATCATTGCGCTTGAGCC  
ATCTCACACCCGAGAACACCTCCTTATTGCCTTCATCTTATCCCCTTGATTCTCCTCG  
TGCTTAAGCCCGAGCTGATCTGAGGTTGGACTGCCTATGACCCCCACACACTTTGCC  
TTCTCCTCAGCCTTTCTTCTGGGTTTAACAGGCCTGGCATTTCACCGGTTCCACCTCC  
TTTCCGCTTTATTATGTCTTGAAGGAATAATACTATCCCTATTTATTGCCCTCTCCCT  
ATGAACACTCCAACCTTGACTCAACAACTTTTCAGCATCTCCTATGCTTCTACTTGCA  
TTTTCAGCCTGCGAAGCAAGCGCCGGCCTCGCCCTGCTAGTAGCCACTGCTCGAACC  
CACGGAACCGACCGACTACAAAGCCTAAATCTTCTCCAATGCTAAATGCACCCCACC  
TCCCTAATGATTTTCGTCAAGCCTGATCACAATCTTTGCATTGCTAGCCTATCCCCTAG  
TCACCACAATACGACCCACGCCCCAAGAACCTCAGTGGGCTTCTACCCATGTAAAAA  
CAGCTGTAAAAATAGCTTTCTTTGTTAGTCTGTTACCCCTGACCCTATTTCTTAATGA  
GGGTGCCGAGACAATCGTTACTAACTGAACCTGAATAAATACTAACTCCTTCGACAT  
CAACATTAGCCTAAAATTTGACTTCTACTCAATTATTTTTTACCCCCATTGCCCTCTAC  
GTAACCTGGTCCATCCTAGAATTTGCATTATGATACATGCATGCAGACCCAAACATA  
AACCGCTTCTTCAAGTATCTACTGACATTTCTGATTGCCATAATCGTTCTCGTAACCG  
CAAACAATATGTTTCAACTATTCATCGGTTGAGAGGGTGTGGGGATCATATCGTTCC  
TCCTTATCGGGTGGTGGTTCGGACGGGCGGATGCTAACACTGCAGCACTTCAAGCAG  
TACTTTATAACCGAGTTGGGGACATCGGTCTTATCTTCGCCATGGCTTGAATAGCAG  
CAAACCTAAACTCCTGGGAAATGCAACAAATCTTTGTAACCTCCAAAGACATAGAC  
TTAACTTATCCTCTCCTCGGGCTCATCATCGCAGCAACCGGCAAGTCGGCTCAATTT  
GGTCTTCACCCCTGACTACCTCCGCTATGGAGGGTCTACACCGGTCTCTGCCCTA  
CTTCATTCTAGCACTATAGTCGTTGCCGGCATTTCCTGCTGGTCCGAATGAGCCCCC  
TCCTGGAAAACAACCAAACCTGCCCTCACAACCTGCCTGTGCCTCGGGGCCCTTACAA  
CACTGTTTACTGCAACCTGTGCCCTCACACAAAATGATATTAAAAAAATCGTCGCAT  
TCTCCACATCAAGCCAGCTTGGACTTATGATGGTAACCATCGGACTAAACCAACCAC

AACTAGCGTTTCTTCACATTTGCACACACGCTTTCTTCAAGGCCATGCTATTTTTATG  
CTCCGGATCTATTATTCATAGTCTTAATGACGAACAAGACATCCGAAAAATAGGAG  
GCATACACCACCTTGCGCCTTTTACATCCTCTTGCCTAACTATTGGCAGTCTTGCCCT  
TACAGGGACCCCCTTCTTAGCTGGCTTCTTCTCTAAAGATGCTATCATCGAAGCACT  
AAACACATCCCACCTAAACGCCTGAGCCCTAACTTTAACCCCTCCTAGCCACCTCTTT  
CACAGCAATTTACAGCTTTTCGAGTAGTATTTTTTGTGCCCATGGGCCACCCCCGGTTT  
AATCCCTCTCCCCCATCAACGAAAATAACCCAGCAGTGATTAACCCACTTAAGCGAT  
TAGCATGAGGAAGCATCGTTGCAGGCTTACTAATTACTTCTAACATTACACCCCTAA  
AAACCCCTGTTATATCTATACCCCTCTCCTTAACTAGCTGCTCTTGCAGTAACAAT  
CCTTGGCCTACTTGTGCTATGGAACCTCGCCATGCTAACTAATAAGCAATATAAATC  
AATACCCGACACAACGTACACCCTTCTCCACCTTGTTAGGCTTCTTCCCCGGAGTA  
ATGCACCGCCTAGCCCCTAAATTACTCTTCTCCTAGGCCAAAACGTTGCCAACCAA  
ACAGTAGATCAAACCTGGCTAGAAAAAATCGGCCCCAAAGCCATTGAGTCCTCTAA  
CCGACCCCTGATCTCTTCTACAAGTAACATTCAGCGAGGAGTAATCAAGACATATCT  
CCCCTTTTCTCCTGACACTAGCCCTTATAATCCCCTATTTCATCGCCTAATGACTTT  
TGCTATATATTTAGTTTTATTTTCTCTCGTGTTAGGGTTAGTTGCAGTTGCTTCTAATC  
CATCTCCTTATTTTCGCTGCTTTGGGTTTGGTTGTAGTAGCTGGGATGGGGTGTGGTAT  
ATTAGTTGGGCATGGGGGGCCTTTTTTGTCACTAGTTTTTGTCTTAATTTACTTGGGT  
GGGATGCTAGTTGTATTTGCATACTCCGCAGCGTTAGCTGCTGAGCCGTATCCGGAG  
AGCTGGGGTAGTTGGTCGGTAATGGTTTATGGTAGTTTATACAGGAGGGGTAATGTA  
GTTTCTGGGCTGTTCTGAGGGGGGTGATACGAGTCGTCTTGGGTCCTAGCAGATGAG  
TTGGCGGAGTTCTCCGTGTTTCGGGGGGATATTGGAGGTGTAGCTTTAATATATTCTT  
CTGGGGGGTGGTTATTAATTATTAGTGCGTGGGTATTGCTTTTAACTTTGTTTGTGGT  
TCTCGAGTTGACCGGGGTATAAGTCGAGGGGGCGTTGCGGCAGTTT"/>

<sequence id="seq\_Reinhardtius\_hippoglossoides\_AM7491331"  
spec="Sequence" taxon="Reinhardtius\_hippoglossoides\_AM749133" totalcount="4"  
value="ATGATACTAAGCTTTTTTGACCAATTTATATCCCCAGTATACCTCGGTATTCC  
GCTAATTGCACTAGCAATTACCCTCCCCTGAATTCTGTTCCCAACCCCTCAAGCCGCT  
GATTAAACAACCGTGTGCTAACACTTCAAGGATGGTTTATTAGCCGCTTCACCTCAC  
AACTTCTTCTTCCCCTAAACCCCGGGGGCCACAAATGAGCAGTTTTATTACCTCATT  
AATGTTTTTCTTTTCTATTAACATACTAGGACTCCTTCCATATACCTTCACACCAACA  
ACCAACTCTCCCTTAATATGGGCCTCGCAGTTCCCCTCTGATTAGCAACTGTCATTA  
TGGAATGCGAAATCAACCTACACATGCCCTAGGTCACCTCCTTCCAGAAGGCACCCC  
TACTGCTCTCATCCCTGTACTCATCATCATTGAAACAATTAGCCTATTTATTCGACCC  
CTCGCTCTCGGTGTTTCGACTAACAGCGAATCTCACAGCAGGCCACCTCCTTATTCAA  
CTCATTGCAACAGCTGCCTTTGTCTTCTTCCGCTCATACTGTTGTTGCTATCTTAA  
CAACGGTGGTCCTCTTCTTCTTACTCTGCTAGAAGTCGCGGTGCGCATGATCCAAG  
CCTATGTCTTTGTTCTACTCTTAAGCCTATATCTACAAGAGAACGTTTAATGCCTCAA  
CTGAACCCCGCACCCCTGATTTGCAATTTTAGTTTTCTCTTGAATAATCTTTTTAACTG  
TTATTCCCCCAAAGTTTTAGCACATACTTACCCCAATGAACCTACCTCCCAAAGCA  
CACAAAAACAAAACAGAACCCTGAACTGACCATGATACTAAGTGGCAATCACACG  
TTGATTTTTCTCGACCAATCACAAAGACATCGGCACCCTCTATCTCGTATTTGGTGCC  
TGAGCCGGTATAGTGGGAACAGGCCTAAGTCTGCTTATTCGGGCAGAACTAAGCCA  
ACCTGGGGCTCTCCTTGGAGACGACCAAATTTATAACGTAATCGTCACCGCACACGC  
CTTTGTAATAATCTTTTTTATAGTAATACCCATTATGATCGGGGGTTTCGGAACTGG  
CTTATTCCACTAATAATTGGAGCCCCAGATATGGCTTTCCTCGAATAAATAACATG  
AGTTTCTGACTTCTTCCCCCATCCTTTCTTCTCCTCTTAGCCTCTTCAGGTGTTGAAGC  
TGGGGCAGGTACGGGGTGAACCGTTTATCCACCACTAGCTGGTAATCTGGCCCCACGC

CGGAGCATCCGTTGACCTAACAATCTTCTCACTTCACCTTGCAGGGATTTCGTCAATT  
CTGGGGGCAATTAACCTTTATTACTACCATCATCAACATGAAACCCACAACAGTTACT  
ATGTACCAAATCCCATTATTTGTTTGAGCCGTTCTAATTACCGCCGTA CTCTTCTTC  
TGTCCCTTCCCGTCTTAGCCGCAGGGATTACAATGCTACTAACAGACCGCAACCTCA  
ACACAACCTTTTTTGACCCCGCCGGAGGTGGTGACCCCATCCTCTATCAACACCTAT  
TCTGATTCTTTGGCCACCCAGAGGTATATATTCTCATTCTTCCAGGCTTCGGAATAAT  
TTCCCACATTGTTGCATACTATGCAGGTAAAAAAGAACCTTTTGGTTACATAGGAAT  
AGTCTGAGCTATAATAGCCATTGGACTCCTGGGATTCAATTGTATGGGCCCATCACAT  
GTTTACAGTCGGGATAGACGTCGACACACGAGCCTACTTTACATCTGCCACAATAAT  
CATTGCAATCCCGACCGGCGTAAAAGTCTTTAGCTGACTCGCAACCCTCCACGGGGG  
AAGCATCAAATGAGAAACGCCACTTCTTTGGGGCCCTCGGCTTTATTTTCTCTTTACA  
GTAGGGGGTCTTACTGGCATTGTCTTGGCTAACTCCTCTCTTGACATTGTTCTGCATG  
ACACATACTATGTAGTAGCCCACTTCCACTATGTACTATCTATGGGTGCTGTATTCGC  
AATCGTTGCCGCCTTCGTCCACTGATTCCCCTACTTTACAGGTTATACCCTCCACTCC  
ACATGAACAAAAATCCACTTCGGCCTGATATTTATTGGGGTCAATCTAACATTCTTC  
CCCCAACACTTCCTGGGCCTAGCCGGAATGCCCCGACGATACTCAGACTACCCAGAC  
GCATATAACCCTTTGAAACACTGTCTCATCAATCGGATCCCTAATGTCGCTCGTCGCT  
GTAATCTTATTTTTGTTTCAATTATTTGAGAAGCATTACAGCCAAACGAGAAGTTGGG  
GCAGTAGAACTTACTGCAACTAACATCGAATGACTTTACGGCTGCCCTCCACCCTAC  
CACACATTTGAAGAGCCCGCATTCGTCCAAGTTCGAATAAACTAAATGGCACATCCC  
TCACAACCTCGGATTTCAAGACGCAGCTTCACCCTTAATAGAAGAACTACTTCACTTC  
CACGATCACGCCTTAATAATTGTAATTCTCATCAGCACGATAGTACTTTATATTATTG  
CGGCTATAGTTACAGCCAACTAACAGATAAACTTGTTCTAGATTCTCAAGAAATTG  
AAATTATCTGAACAGTTCTCCCAGCTGTTATTCTTATTCTCATCGCCCTACCATCTCT  
CCGAATTTTGTACTTAATAGACGAAATTAATGATCCCCACTTAACAATCAAAGCCAT  
GGGCCACCAGTGGTACTGAAGCTACGAATACACAGACTATGAAGACCTCGGTTTTG  
ACTCTTACATAATCCCTACACAAGACCTGACCCCTGGACAGTTCCGACTACTTGAAG  
CAGATCACCGGATAGTAATCCCGGTAGAATCTCCTATTCGCGTTCTAATCTCAGCTG  
AAGATGTATTACATTCCTGAGCAGTCCCCTCCCTGGGCGTAAAAGTTGACGCCGTAC  
CTGGACGATTAAATCAAGCAACCTTTATTGTTAGCCGGCCAGGCGTATTTTATGGTC  
AATGCTCTGAAATTTGCGGAGCGAACCATAGTTTTTATACCCTATCGTTGTAGAAGCAG  
TCCCCCTTGAACACTTTGAAAACCTGGTCTTCACTAATAATTGAAGACGCCTATGGCC  
CATCAAGCACACCCATACCACATAGTCGACCCCAGTCCATGACCCCTCACGGGGGCT  
ATTGCTGCCCTATTGATAACATCTGGCCTTGCTATCTGATTTCACTTCCATTCCACAA  
CCCTTATAACTATTGGGACAGTCCTTCTCACCTTAACAATCTTCCAATGATGACGGG  
ACGTCGTACGAGAAGGCACATTTCAAGGACACCACACTCCCCCTGTTCAAATAGGC  
CTCCGATACGGAATAATCTTATTTATTACCTCAGAAGTTCTGTTCTTCTTAGGCTTCT  
TCTGAGCCTTTTACCACTCAAGCCTAGCACCTACTCCAGAACTAGGAGGCTTCTGAC  
CCCCAGCAGGCATTACCCCTTTAGACCCATTTGAAGTCCCGCTTCTTAACACAGCAG  
TCCTCCTTGCCCTCTGGTGTAACCTGTTACCTGAGCACATCACAGCATTATAGAGGGTA  
AACGGAAACAACTATTCAATCTCTTGCCCTCACAATCTTACTCGGGGGTTACTTCA  
CTTTTCTCCAAGGCCTTGAGTATGTCGAAGCCCCCTTACCATTGCAGACGGAGTTT  
ACGGTGCTACATTCTTTGTTGCCACCGGCTTCCACGGCCTCCACGTCTTAATTGGCAC  
CTCATTCTTAGCCGTTTGTCTGTTACGCCAAATCCTTACCATTTTACATCAAACCAC  
CACTTTGGGTTTGAAGCAGCCGCATGATACTGACACTTCGTAGACGTCGTCTGACTT  
TTCCTCTATATCTCTATTTACTGATGAGGATCTTAATGGCCAGTCTACGTAAATCCCA  
CCCTCTTCTAAAAATCGCAAACGATGCTTTAGTTGACCTCCCAGCCCCCTCTAATATC  
TCCGTTTGGTGAAACTTTGGGTCTCTTCTAGGACTCTGTTTAGTAACCCAAATTGCTA

CCGGCTTGTTTCTAGCCATACACTATACATCAGATATTGCTACTGCCTTCACCTCCGT  
GGCTCACATCTGCCGGGACGTCAACTACGGCTGACTTATCCGAAGCATTTCATGCCAA  
CGGCGCATCATTCTTTTTTCATTTGCATCTACCTACACATCGGGCCGAGGACTCTACTAT  
GGCTCATACCTCTATAAAGAAACATGAACTATTGGAGTCGTCCTCCTCCTCCTCGTA  
ATAATAACGGCCTTCGTCGGATACGTCCCTCCCTTGAGGACAAATGTCGTTTTGAGGT  
GCAACCGTTATTACCAACCTCCTATCCGCCGTCCTTATGTTGGCAACACCCTAGTC  
CAATGGATTTGAGGTGGTTTTTCTGTAGACAATGCTACCCTTACCCGGTTCTTTGCCT  
TCCACTTCCTTTTCCCCTTCATCATCGCCGCCGCAACAGTAATTCATCTACTATTTCTT  
CACGAAACTGGCTCAAATAATCCCACCGGCTTAAACTCAGACTCAGACAAGGTTC  
CTTCCACCCTTACTTCACTTACAAAGACCTCTTGGTTTTTGCAGTGCTCCTCACTGCAT  
TAGCATCCCTCGCTTTGTTTTTACCTAATCTTTTAGGAGACCCAGATAACTTTACCCC  
CGCAAATCCACTTGTTACACCCCCACACATTAAACCAGAGTGATACTTCCTCTTTGC  
TTACGCTATTCTCCGGTCCATCCCAAACAACTTGAGAGGCGTTCTTGCCCTTTTATTT  
TCGATCTTAGTTCTCATGCTTGTCCCCTTCCTTCACACCTCTAAACAACGCAGCCTAA  
TGTTCCGCCCTCTAACGCAATTTTTGTTCTGGTCTCTGGTAGCAGACGTTATAATTCT  
AACTTGAATTGGAGGAATGCCCCGTAGAACACCCCTTCGTTATCATTGGACAAGTAGC  
ATCACTCCTTTACTTCGCCCTCTTTCTGGTCCCTGATCCCAACAGCAGGTTTACTAGAG  
AATAAAGTCCTTGATGAAAATATGATTTCAACTCTCATTACCCATATTATTAACCC  
CCTAACCTTTATTGTACCTGTATTGCTAGCCGTAGCATTCCTCACCTCCTTGAACGA  
AAAGTCCTAGGCTACATACAACTCCGAAAAGGGCCTAACATCGTAGGGCCTTACGG  
CCTCCTTCAACCCATTGCTGACGGCGTAAACTCTTTATTAAAGAACCCGTTCCGCC  
TTCCACCGCATCCCCCGTTCTGTTCCCTCCTGGCCCCCTATACTCGCACTCACACTGGCC  
CTGACCCTTTGAGCCCCCATGCCTTTCCCGTACCCTGTTGTGGACCTTAACCTGGGTA  
TCCTTTTTATTCTAGCACTATCTAGCCTTGCAGTATACTCTATTCTTGGGTCTGGTTG  
AGCATCCAATTCAAAATACGCTTTAGTAGGAGCACTGCGGGCTGTTGCACAAACAA  
TTTCTTACGAAGTTAGCCTAGGACTCATCCTCCTTAACATCATCATCTTTACCGGAGG  
ATTTACACTTCAGACCTTTAACACGGCCCAAGAGGCCATCTGACTAGTTGTACCCGC  
CTGACCCCTCGCTGCCATATGATACATCTCCACTCTTGCCGAAACAAACCGTGCACC  
CTTCGACCTAACAGAGGGGGAATCTGAACTTGTTTCAGGCTTCAACGTAGAAATACGC  
AGGAGGGGCCCTTCGCTTTGTTCTTTTTAGCCGAATACTCAAATATCCTCCTAATAAAT  
ACTCTGTCCGCAACATTATTTTTGGGCGCCTCCCACATTCCCTCTATCCCAGAATTAA  
CTAGCATTAATATTATAACTAAAGCAGCCCTTCTCTCAATTGTTTTTCTGTGAGTCCG  
AGCTTCGTACCCGCGATTCCGTTACGACCAACTTATGCACCTCATTTGAAAGAACTT  
TCTTCCACTGACTTTAGCACTAGTTATTTGACACTTAGCGCTCCCTATTGCATTCGCT  
GGTCTCCCACCACAACCTATAAATGAACCCCTACATCTTGACCCTCTTATATTTGGTT  
TGGGCCTAGGAACAACACTTACGTTTGCAAGCTCACACTGACTCCTCGCTTGAATAG  
GCCTCGAAATTAATACACTAGCCATTATTCCACTAATAGCCCAACATCATCACCCCC  
GAGCAGTCGAAGCTACTACTAAATACTTTCTCGCACAAGCCACAGCAGCCGCTACCC  
TCTTGTTTGCAAGTACCACCAACGCATGACTAACAGGCCAATGAGACATCCAACAA  
ATAACACACCCCCCTCCCCACAACAATAATTGTTATTGCCCTAGCACTAAAAATTGGA  
CTAGCACCAATACACTCTTGACTTCCAGAAGTGCTTCAAGGACTAGACCTCACCACC  
GGACTTATCCTCTCGACTTGACAAAACTTGCAACCCTTTGCCCTATTACTACAAATTC  
AAGCAACAACCCTACGCCTCTAATCATTATTGGCTTGCTATCCACCCTCGTTGGAGG  
ATGAGGTGGTCTCAATCAAACCTCAATTACGTAAAGTCCTCGCCTACTCCTCGATTGC  
CCATCTTGGCTGAATAATACTAATCATTTCAGTTTTACCCCTCCTCGCCCTCCTTGCC  
CTACTCACGTATTTTCTATGACTTTTTTCAGCATTCCTAATCTTTAAAGTAAACAAGGC  
TACCACTGTCAATGCCCTCGCAATCTCATGAACAAAAACCCCTGCCCTCACAGCCCT  
AGCACCCCTAGTCTTATTGTCCCTTGGTGGCCTCCCTCCCCTTACCGGCTTCATACCC



AAATGATTTATTCTTCAAGAACTGACTAAGCAAGACCTCCCACCCTTGCTACCCTCG  
CCGCATTAAGTCCCTCTTAAGCCTTTACTTCTACTTGCGCCTCTCGTACGCGATAAC  
CCTGACAATGTTCCCTAACAACCTCGTCGGCGTTACCCCTGACGGTTCTATTCTCCC  
CAATTTACGCTTCCCCTCGCCATGTCCACTGCAGCAACCACCCTTCTTCTCCCACTAG  
CCCCTGCTGCTGTAGCACTACTCATAGCTTATGAGCCTTCTTCTAACCATCATTTCAA  
TCGCCACCCTCCTCTCAACAGTACTTGCCATTGTATCCTTTTGACTCCCCCAAATTAC  
ACCAGACCATGAAAAGCTATCACCATACGAATGCGGGCTTTGACCCGATAGGCTCTG  
CCCGACTACCTTTTTTCGCTGCGATTTTTTCTCATCGCCATCCTCTTTCTCCTGTTGAC  
TTAGAGATTGCACTCCTCCTCCCCCTTCCCTGAGGAGACCAATTAGCATCGCCACTA  
CTCACATTCACTTGAGCTACAGCTGTCCTAGCGCTTCTAACCCTTGGCCTCATTTACG  
AATGAATGCAAGGAGGCCTAGAGTGAGCTGAATATGCTAAAAATCCTAATTCCAAC  
ACTTATGCTAATCCCATCAGCCTGGTACTCAAACCCAGCTGACTCTGGCCCATAAC  
CTTGATGTATAGCTTTTGCATCTCCTTAATTAGCCTTTCATGATTGAAGAACCCTCTCA  
GAAACCGGCTGATCATCACTTAACCTCTTTATAGCCACCGACTCCCTATCAACCCCC  
CTCCTCGTTCTCACATGCTGGCTGCTACCACTAATGATTTTGGCAAGCCAAAAACAC  
ACAGCCTCAGAGCCTCTTGGTCGCCAGCGCATGTACATTACACTTCTCGCCTCCTCC  
AGTTCTTCCTGATTCTAGCATTTAGCGCCACTGAGCTGGTAATGTTTTACGTAATATT  
TGAAGCCACCCTCATCCCCACTCTGATTATTATTACCCGCTGAGGGAACCAAACAGA  
ACGCCTAAATGCAGGGACCTACTTTCTTTTTTACACATTGGCAGGCTCACTACCCTT  
CTCGTTGCTTTACTTCTTCTCCAGAACACATCCGGCACCCCTGTCGTTGCTAACCCTAC  
ACTATACAGACCCACTCACTCTCATCTTATGCAGACAAATTATGATGAGCAGGCTGT  
CTCTTAGCATTCCTCGTTAAAATACCTCTCTATGGAGTCCACCTGTGACTCCCTAAAG  
CCCACGTTGAAGCCCCCATTGCAGGCTCAATGATCCTTGCAGCGGTTCTCTTAAAC  
TGGGAGGGTATGGCATGATCCGCATAATAACAATATTAGAGCCTCTAACTAAGGAG  
CTAAGCTACCCCTTCATTGTCTTTGCACTTTGGGGGGTAATCATAACTGGCTCAATTT  
GTCTACGACAGACAGACCTTAAGTCCCTAATTGCCTACTCATCTGTAAGTCACATGG  
GCCTAGTGGCCGGGGGAATTCTTATTCAGTTACCCTGGGGCTTAACAGGGGGCCCTTA  
CCCTAATAATTGCACACGGTCTTACCTCATCAGCCCTCTTCTGCCTAGCAAACACAA  
ACTATGAACGAACCCACAGTCGAACGATAGTACTAGCACGAGGGCTTCAAGTAGCT  
CTACCATTGATGGCCACTTGATGATTTATTTCTAGCTTAGCCAACCTAGCCCTTCCAC  
CACTACCTAACCTCATAGGTGAACTAATAATTATTACTTCTCTATTCAACTGATCCTG  
GTGAACTCTAGCATTAACCGGGGCAGGCACTCTAATTACAGCTGGTTACTCCCTTTA  
TATGTTCTTAATAACTCAACGGGGACCTCTCCCAGCACATATCATTGCGCTTGAGCC  
ATCTCACACCCGAGAACACCTCCTTATTGCCTTCATCTTATCCCCCTTGATTCTCCTCG  
TGCTTAAGCCCGAGCTGATCTGAGGTTGGACTGCCTATGACCCCCACACACTTTGCC  
TTCTCCTCAGCCTTTCTTCTGGGTTTAACAGGCCTGGCATTTCACCGGTTCCACCTCC  
TTTCCGCTTTATTATGTCTTGAAGGAATAATACTATCCCTATTTATTGCCCTCTCCCT  
ATGAACACTCCAACCTTGACTCAACAACTTTTCAGCATCTCCTATGCTTCTACTTGCA  
TTTTTCAGCCTGCGAAGCAAGCGCCGGCCTCGCCCTGCTAGTAGCCACTGCTCGAACC  
CACGGAACCGACCGACTACAAAGCCTAAATCTTCTCCAATGCTAAATGCACCCACC  
TCCCTAATGATTTTCGTCAAGCCTGATCACAATCTTTGCATTGCTAGCCTATCCCCTAG  
TCACCACAATACGACCCACGCCCCAAGAACCTCAGTGGGCTTCTACCCATGTTAAAA  
CAGCTGTAAAAATAGCTTTCTTTGTTAGTCTGTTACCCCTGACCCTATTTCTTAATGA  
GGGTGCCGAGACAATCGTTACTAACTGAACCTGAATAAATACTAACTCCTTCGACAT  
CAACATTAGCCTAAAATTTGACTTCTACTCAATTATTTTTACCCCCATTGCCCTCTAC  
GTAACCTGGTCCATCCTAGAATTTGCATTATGATACATGCATGCAGACCCAAACATA  
AACCGCTTCTTCAAGTATCTACTGACATTTCTGATTGCCATAATCGTTCTCGTAACCG  
CAAACAATATGTTTCAACTATTCATCGGTTGAGAGGGTGTGGGGATCATATCGTTCC

TCCTTATCGGGTGGTGGTTCGGACGGGCGGATGCTAACACTGCAGCACTTCAAGCAG  
TACTTTATAACCGAGTTGGGGACATCGGTCTTATCTTCGCCATGGCTTGAATAGCAG  
CAAACCTAAACTCCTGGGAAATGCAACAAATCTTTGTAACCTCCAAAGACATAGAC  
TTAACTTATCCTCTCCTCGGGCTCATCATCGCAGCAACCGGCAAGTCGGCTCAATTT  
GGTCTTCACCCCTGACTACCCTCCGCTATGGAGGGTCTACACCGGTCTCTGCCCTA  
CTTCATTCTAGCACTATAGTCGTTGCCGGCATTTCCTGCTGGTCCGAATGAGCCCCC  
TCCTGGAAAACAACCAAACCTGCCCTCACAACCTGCCTGTGCCTCGGGGGCCCTTACAA  
CACTGTTTACTGCAACCTGTGCCCTCACACAAAATGATATTAATAAAAAATCGTCGCAT  
TCTCCACATCAAGCCAGCTTGGACTTATGATGGTAACCATCGGACTAAACCAACCAC  
AACTAGCGTTTCTTCACATTTGCACACACGCTTTCTTCAAGGCCATGCTATTTTTATG  
CTCCGGATCTATTATTCATAGTCTTAATGACGAACAAGACATCCGAAAAATAGGAG  
GCATACACCACCTTGCGCCTTTTACATCCTCTTGCCCTAACTATTGGCAGTCTTGCCCT  
TACAGGGACCCCTTCTTAGCTGGCTTCTTCTCTAAAGATGCCATCATCGAAGCACT  
AAACACATCCCACCTAAACGCCTGAGCCCTAACTTTAACCCCTCCTAGCCACCTCTTT  
CACAGCAATTTACAGCTTTTCGAGTAGTATTTTTTTGTGCCCATGGGTACCCCCGGTTT  
AATCCCTCTCCCCCATCAACGAAAATAAACCAGCAGTGATTAACCCACTTAAGCGAT  
TAGCATGAGGAAGCATCGTTGCAGGCTTACTAATTACTTCTAACATTACACCCCTAA  
AAACCCCTGTTATATCTATACCCCTCTCCTTAAACTAGCTGCTCTTGCCAGTAACAAT  
CCTTGGCCTACTTGTGCTATGGAACCTCGCCATGCTAACTAATAAGCAACATAAATC  
AATACCCGACACAACGTACACCCTTCTCCACCTTGTTAGGCTTCTTCCCCGGAGTA  
ATGCACCGCCTAGCCCTAAATTACTCTTCTTCTAGGCCAAAACGTTGCCAACCAA  
ACAGTAGATCAAACCTGGCTAGAAAAAATCGGCCCCAAAGCCATTGAGTCCTCTAA  
CCGACCCCTGATCTCTTCTACAAGTAACATTCAGCGAGGAGTAATCAAGACATATCT  
CCCCTTTTCTCCTGACACTAGCCCTTATAATCCCACTATTCATCGCCTAATGACTTT  
TGCTATATATTTAGTTTTATTTCTCTCGTGTTAGGGTTAGTTGCAGTTGCTTCTAATC  
CATCTCCTTATTTTCGCTGCTTTGGGTTTGGTTGTAGTAGCTGGGATGGGGTGTGGTAT  
ATTAGTTGGGCATGGGGGGCCTTTTTTGTCACTAGTTTTTGTCTTAATTTACTTGGGT  
GGGATGCTAGTTGTATTTGCATACTCCGCAGCGTTAGCTGCTGAGCCGTATCCGGAG  
AGCTGGGGTAGTTGGTCGGTAATGGTTTATGGTAGTTTATACAGGAGGGGTAAATGTA  
GTTTCTGGGCTGTTCTGAGGGGGGTGATACGAGTCGTCTTGGGTCCTAGCAGATGAG  
TTGGCGGAGTTCTCCGTGTTTCGGGGGGATATCGGAGGTGTAGCCTTAATATATTCT  
TCTGGGGGGTGGTTATTAATTATTAGTGCGTGGGTATTGCTTTTAACTTTGTTTGTGG  
TTCTCGAGTTGACCGGGGTATAAGTCGAGGGGGCGTTGCGGCAGTTT"/>

<sequence id="seq\_Verasper\_moseri\_EF0255061" spec="Sequence"

taxon="Verasper\_moseri\_EF025506" totalcount="4"

value="ATGATATTAAGCTTCTTTGACCAATTTATATCCCCAGTATGCCTTGGCATCCC  
ACTAATTGCACTAGCAATTAGCCTACCCTGAATTTTTTTCCCGGCCCCCAAACCGTT  
GATTAAACAACCGCGTGCTAACACTTCAAGGCTGATTTATGAGCAACTTCGCCTCAC  
AACTCCTTTTACCCTAAACCCCTGGTGGTCACAAGTGAGCAATTCTATTTACCTCACT  
AATGTTTTTTTTTCTATTAATACTGGGTCTCCTCCCATATACCTTCACACCAACA  
ACTCAACTCTCGCTTAACCTAGGCTTCGCAGTTCCCCTCTGATTAGCAACTGTCATTA  
TGGAATACGTAATCAACCAACACATGCACTGGGACACCTTCTTCCAGAAGGCACCC  
CTACTGCCCTCATTCCTGTACTTATTATCATCGAGACAATTAGCCTATTCATTGCCCC  
CCTCGCTCTCGGTGTTTCGACTCACAGCAAATCTCACAGCGGGCCACTTACTCATTCA  
ACTCATTGCAACGGCTGCCTTCGTCCTTCTTCCCCTAATACCCGTTGTTGCTATCTTA  
ACAACAGTAGTCCTCTTCCCTCCTGACTCTACTAGAAATTGCCGTTGCCATGATTCAA  
GCCTATGTCTTCGTCCTACTCCTAAGCCTCTACCTACAAGAAAACGTTTAATGCCTCA  
ACTAAACCCACACCCTGATTTGCAATTTTAGTTTTCTCTTGAATAATCTTCCTAGTT

GTAATTCCCCCAAAAATTTTAGCACACGTCTACCCTAATGAACCCACCTCCCAAAGC  
ACACAAAAATAAAACAGAACCCTGAAACTGACCATGATATTAAGTGGCAATCACAC  
GATGATTTTTCTCGACCAATCACAAAGACATCGGCACCCTCTATCTCGTATTTGGTG  
CCTGAGCCGGAATAGTGGGGACAGGCCTAAGTCTACTCATTCGAGCAGAACTAAGC  
CAACCCGGGGCTCTCTTGGGGGACGACCAAATTTATAACGTAATCGTCACCGCACAC  
GCCTTTGTAATAATCTTCTTTATAGTTATACCCATTATGATCGGAGGATTCGGGAACT  
GACTTATCCCCTTAATAATTGGAGCTCCAGACATGGCCTTCCCTCGAATGAATAACA  
TGAGCTTCTGACTTCTTCCCCCTCATTTCTTCTACTCCTAGCCTCTTCAGGTGTTGAA  
GCTGGGGCAGGAACAGGGTGGACCGTTTATCCTCCACTAGCTGGCAATTTAGCCCAC  
GCCGGGGCCTCCGTAGACCTAACAAATCTTTTCACTTCACCTTGCAGGAATTCATCA  
ATTCTGGGAGCAATTAACCTTTATTACTACTATCATCAACATAAAACCTACGACAGTA  
ACTATATACCAAATTCCATTATTTGTCTGAGCCGTACTAATTACAGCCGTTCTACTTC  
TTCTTTCCCTTCCCGTCTTAGCCGCAGGTATTACAATACTACTAACAGACCGAAACCT  
TAACACAACCTTCTTTGACCCCGCCGGAGGGGGTGACCCCATCCTCTATCAACATTT  
ATTCTGATTCTTTGGCCACCCGGAAGTATATATTCTCATTCTTCCAGGTTTCGGAATA  
ATTTCTCACATCGTAGCATACTACTCAGGTAAGAAAGAACCTTTTGGTTATATAGGA  
ATAGTCTGAGCTATGATAGCCATTGGACTCCTCGGATTTATTGTATGGGCCCATCAC  
ATGTTACAGTCGGGATAGATGTAGACACACGAGCCTATTTTACCTCTGCCACAATA  
ATCATTGCGATTCCAACCGGCGTAAAAGTCTTTAGTTGACTCGCAACCCTTCATGGA  
GGAAGCATTAATGAGAAACACCACTTCTTTGGGCTCTGGGCTTTATTTTCCTGTTTA  
CAGTAGGAGGACTTACCGGCATTGTCTTAGCTAATTCCTCTCTTGATATTGTCCTGCA  
TGACACATACTATGTGGTAGCCCACTTCCACTATGTTCTATCTATGGGGGCTGTATTT  
GCAATCGTTGCTGCCTTCGTCCACTGATTCCCATTATTTTCAGGCTATACCCTTCACT  
CTACATGAACAAAAATTCACTTCGGCCTGATGTTTATTGGGGTTAATCTAACGTTCTT  
TCCCCAACACTTCCTAGGTCTGGCCGGAATACCTCGACGGTACTCAGACTACCCAGA  
CGCTTACACCCTTTGAAATACTGTCTCATCAATCGGATCTCTAATGTCGCTCCTCGCT  
GTAATTTTATTTTATTTATTATTTGAGAAGCATTACAGCCAAACGAGAAGTTAGC  
GCAGTAGAACTAACTACAATAATTTGAATGACTTTACGGCTGCCCCCACCTTAC  
CACACATTTGAAGAGCCCGCATTTGTTCAAGTCCGAATAAGCTAAATGGCCCATCCC  
TCACAACCTTGGATTCCAAGACGCAGCTTCACCCTTAATAGAAGAACTACTTCACTTC  
CACGATCACGCCTTAATAATTGTAATTCTTATCAGCACGATAGTACTATATATTATTG  
CGGCTATAGTCACAGCGAACTTACAGATAAACTTGTTCTAGACTCCCAAGAAATTG  
AGATCATCTGAACAGTTCTCCCAGCTGTTATTCTTATCCTCATTGCCCTACCATCCGT  
CCGGATTTTATACTTAATAGACGAAATTAATGACCCTCACCTGACAATTAAAGCCTT  
AGGCCATCAGTGGTACTGAAGTTACGAGTATACAGACTACGAAGACCTCGGTTTTG  
ACTCTTACATAATTCCTACACAGGACCTTACCCCGGACAATTCCGACTTCTAGAGG  
CAGACCACCGAATAGTAATCCCCGTGGAATCTCCAATTCGTGTTCTTATTACAGCTG  
AAGATGTCCTGCATTCTGAGCAGTCCCCTCGCTGGGCGTAAAAGTCGACGCCGTGC  
CTGGTCGGTTAAACCAAGCAACCTTTATTGTCAGCCGACCAGGCGTATACTTCGGAC  
AATGCTCTGAAATCTGCGGGGCAAACCATAGTTTTATGCCCATCGTTGTAGAAGCAG  
TCCCCCTTGAGCACTTCGAAAACCTGGTCTTCCCTAATAATTGAAGATGCCTATGGCC  
CATCAAGCACACCCATACCACATAGTCGACCCACGCCATGACCCCTCACGGGGGC  
TATCGCTGCCCTATTGATAACATCTGGCCTTGCTATCTGATTTCACTTCCATTCCACT  
GTTTTAATAACTATCGGAACAATCCTACTTATTTTAACAATCTTCCAGTGATGGCGA  
GACGTCGTACGAGAGGGCACGTTTCAAGGACACCACACTCTTCCTGTTCAAAAAGG  
CCTCCGGTATGGTATAATCCTATTTATTACCTCAGAAGTTCTATTCTTCCTAGGCTTC  
TTCTGAGCCTTCTACCACTCGAGCCTAGCACCCACCCCTGAATTAGGAGGCTTTTGA  
CCACCAGCAGGCATTACACCCCTAGACCCATTTGAAGTCCCCTTCTTAATACAGCA

GTCTCCTTGCTTCTGGCGTGACTGTTACCTGAGCACATCACAGCATCATAGAGGGT  
AAACGAAAACAAGCTATCCACTCTCTTGCTCTTACAATTTTACTTGGGGGATACTTC  
ACTTTTCTTCAAGCCCTTGAATATCACGAAGCTCCCTTCACTATTGCAGACGGAGTTT  
ACGGTGCTACATTCTTTGTTGCCACTGGCTTCCACGGACTACACGTCTTAATTGGCTC  
ATCATTCTTAGCCGTTTGTGTTGTACGCCAAATTCTCCACCATTTTACATCAAACCAC  
CACTTTGGATTTGAAGCAGCCGCATGGTACTGACACTTCGTAGACGTCGTCTGACTC  
TTCTGTACATCTCTATTTACTGATGAGGATCTTAATGGCCAGCCTACGCAAATCCC  
ACCCCTTCTAAAAATCGCAAACGATGCTTTAATTGACCTCCCTGCCCCCTCTAATAT  
CTCTGTTTGATGAACTTTGGGTCTCTTCTGGGACTTTGCCTGGCTACTCAAATTGTG  
ACCGGCTTATTTTTAGCCATACACTATACGTCAGACATTGCTACTGCCTTCACCTCTA  
TTGCACATATCTGCCGGGACGTTAACTACGGTTGGCTTATCCGAAGCATTCATGCCA  
ATGGCGCATCATTCTTTTTCATTTGTATTTACCTTCATATCGGTTCGAGGTCTATATTA  
TGGCTCCTACCTCTATAAAGAAACATGAACTATCGGAGTTGTCCTGCTTCTTCTCGTA  
ATAATGACAGCTTTCGTTGGATACGTTCTCCCTTGGGGACAAATGTCGTTTTGAGGT  
GCAACCGTTATTACCAATCTTCTGTCCGCCATCCCTTATGTCGGTAACACCCCTCGTCC  
AATGAATCTGGGGTGGCTTCTCCGTAGACAATGCTACCCTCACCCGGTTCTTTGCCTT  
CCACTTCCTTTTCCCCTTTATTATCGCAGCCGCAACAGTGATCCATCTTCTCTTCCTTC  
ACGAAACTGGCTCAAACAACCCACCCGGGTAAATTCAGATTCTGACAAGGTCCCTT  
TCCACCCTTACTTCACTTACAAGGACCTCTTGGCTTTGCAATCCTTCTTGCTGCACTA  
ACATCCCTTGCCCTGTTTTCCCCAAACCTTTTAGGGGACCCAGACAACTTTACCCCTG  
CAAATCCACTTGTTACTCCCCACATATCAAGCCAGAATGATACTTCCTTTTTGCTTA  
CGCTATCCTCCGCTCCATCCCAAACAAGCTTGGAGGCGTACTTGCCCTTTTATTTTCG  
ATTTTAGTCTTAATGCTCGTCCCCCTTCTCCATACCTCTAAACAGCGAAGCCTAATAT  
TCCGCCCTCTAACACAATTCTTATTCTGGTCATTAGTAGCAGACGTTATAATTCTAAC  
TTGAATTGGAGGCATACCTGTAGAACACCCCTTCGTCATCATTGGACAAGTAGCATC  
ACTCCTTTATTTTCGCTCTCTTCCCTGGTCCTGATCCCAACAGCAGGTTGACTAGAGAAC  
AAAGTCCTCGGATGAAAATATGATTTCAACTCTCATTACGCATATTATCAACCCACT  
AACCTTTATTGTACCCGTATTGCTGGCCGTAGCATTCCTTACCCTCCTTGAACGGAAA  
GTACTAGGCTACATACAACCTCCGTAAAGGGCCAAACATCGTAGGACCTTACGGTCTC  
CTCCAACCCATTGCTGACGGCCTAAAACTCTTTATTAAAGAACCCGTTTCGACCTTCA  
ACCGCATCCCCTATCTTGTTCCCTCCTAGCCCCAATGCTCGCACTTACACTAGCCCTTA  
CCCTTTGAGCCCCCATAACCTTTCCCATACCCCGTCGTAGATCTTAACCTCGGTATTTT  
ATTTATTCTAGCACTGTCTAGCCTTGCAGTGTACTCTATTCTGGGGTCCGGCTGGGCA  
TCCAATTCAAAATATGCCTTAGTGGGAGCACTTCGGGGCCGTTGCACAAACCATTTC  
TACGAAGTCAGCCTAGGACTCATCTTACTAAATATCATTATCTTTACTGGGGGCTTC  
ACGCTCCAGACCTTTAATACAGCCCAAGAGGCCATCTGACTGGTAGTGCCTGCTTGA  
CCCCTAGCTGCCATATGATACATCTCCACTCTTGCCGAAACAAACCGTGCACCCTTC  
GACCTGACAGAGGGTGAATCCGAACCTTGTTTTAGGCTTCAACGTAGAATAACGCAGG  
CGGACCCTTCGCCCTATTCTTTTTAGCCGAATATTCCAACATCCTCCTAATAAATACT  
CTGTCCGCGACACTATTTTTGGGCGCCTCTCACATTCCATCTATCCCCGAATTAACCA  
GCATCAATATTATAACTAAAGCAGCCCTTCTATCAATCGTCTTCCTATGGGTCCGAG  
CTTCCTACCCCCGATTCCGTTATGACCAGCTCATACACCTCATCTGAAAAAACTTCCT  
CCCCCTAACTTTAGCTCTGGTTATTTGACACTTAGCGCTTCCCATCGCACTCGCTGGG  
CTCCCCCACAACCTGTAAATGAACCCCTACATCTTCGCCACCCTTCTATTTGGTTTGG  
GCTTAGGTACAACACTCACGTTTGCAAGCTCACACTGGCTCCTCGCTTGAATGGGCC  
TTGAAATTAATACTAGCCATCATCCCCCTAATAGCCCAACATCACCACCCACGAG  
CAGTTGAAGCTACTACTAAGTATTTTCTCGCACAAGCCACAGCAGCCGCCACCCTCC  
TGTTTGCGAGTACTACCAACGCTTGACTACCGGCCAATGGGATATTCAACAGATGA

CACACCCGCTCCCCACAACCTATAATTGTTATTGCCCTAGCACTAAAAATTGGACTAG  
CACCAATACACTCTTGACTTCCAGAGGTTCTTCAAGGACTAGACCTCACCCTGGAC  
TAATCCTCTCGACCTGACAAAACTTGCCCCCTTTACCCTCTTGTTGCAGATTCAAAC  
AACAAATCCTGTACCCCTAATCATTATTGGCTTGCTTTCTACCCTCGTTGGCGGCTGAG  
GTGGCCTTAACCAAACCCAATTACGTAAAATCCTTGCCATTTCCTCAATCGCTCACC  
TTGGCTGAATAGTACTGGTTCTTCAATTTTCACCCTCCTCAGTCTCCTCACCCTCCT  
CACGTACTTTCAATGACTTTTTCAACATTCTGGTCTTCAAAGTAAACAAGGCTACC  
ACTGTCAATACCCTCGCGATCTCGTGAACGAAAACCTCCCGTCCTCACAGCCCTGGCA  
CCTCTGGTTTTATTATCTCTGGGCGGCCTTCCCCCTCTTACCGGCTTCATACCCAAGT  
GACTTATTCTCCAAGAATTGACTAAGCAAGACCTCCCACACTTGCCACCCTCGCTGC  
ATTAAGTGCCCTCCTGAGTCTTTACTTCTACTTGCGTCTTTCGTACGCAATAACCCTC  
ACAATATCCCCTAACAACCTCATTGGTATTACTCCCTGACGATTCTACTCCCCCAGT  
TTACACTCCCCCTCGCCGTATCCACTGCAGCAGCCACACTTCTCCTCCCCTAGCACC  
AGCTGCCGTGGCACTACTCATCACCTATGAGCCTCCTTCTAACCATCCTTTCAATTGC  
TACTCTCCTCTCAACAGTACTTGCCATTGTATCCTTTTGACTACCCCAAATTATGCCA  
GACCATGAGAAGCTGTCACCATATGAATGCGGCTTTGACCCTATGGGCTCCGCCCCGA  
CTACCTTTTTCACTGCGATTTTTTCTCATTGCCATCCTTTTTCTTCTTCGACCTAGA  
AATTGCACTCCTCCTCCCCCTCCCCTGAGGGGACCAACTAGCATCACCCCTACTTAC  
ATTCACTTGAGCTACAGCTGTCCTAGCCCTCCTAACCCTTGCCCTCATTTATGAATGA  
GTACAAGGAGGCTTAGAATGAGCTGAATATGCTAAAAATTCTTATTCCAACACTCAT  
ACTTATTCCAACAGCCTGATTACTTAAACCCAGCCGACTCTGGCCGATTACCTTAAT  
GTATAGCTTTTGCATCTCCTTGCTTAGCCTCTCGTGACTAAAAACCTCTCAGAAACC  
GGCTGGTCGTCACTCAACCTATTTATGGCCACCGACTCCCTATCAACCCCCCTCCTCG  
TTCTTACATGCTGACTACTACCACTAATAATCTTAGCAAGTCAAAGCACACAACCT  
CAGAACCCCTAAACCGCCAACGCATATACATTACACTTCTTGCTTCTCCTCAGTTCTTC  
CTAATTCTAGCATTTAGCGCCACAGAACTAGTGATGTTCTACGTAATATTTGAGGCC  
ACCCTCATCCCCACACTAATCATTATCACCCGCTGGGGAAACCAAACAGAACGCTTA  
AATGCGGGGACCTATTTTCTCTTCTACACATTAGCAGGCTCACTTCCTCTCCTCGTTG  
CTTTACTCCTGCTTCAAAATACATCCGGCACCTTGTCTTTATTAACCCTCCATTACAC  
AAATCCCCTCGCTCTCATCTTACGCAGACAAATTATGATGAGCAGGCTGTCTTCTAG  
CATTTCTAGTTAAAATACCCCTCTATGGAGTCCACCTCTGACTTCCTAAAGCCCACGT  
TGAAGCCCCAATTGCAGGCTCAATGATCCTTGACGAGTTCCTTCTAAAACTAGGAGG  
ATACGGCATGATCCGAATAATAACAATGCTAGAACCTCTAACTAAGGAACTAAGCT  
ACCCATTCAATTGTCTTTGCACTTTGAGGGGTTATTATGACCGGCTCAATTTGCCTACG  
ACAAACGGACCTCAAATCCCTGATTGCCTACTCATCTGTAAGCCACATGGGCCTGGT  
GGCTGGAGGCATTCTTATTAGTCACCCTGAGGCTTAACGGGGGGCCCTTACCCTTAT  
AATCGCACATGGTCTTACCTCATCAGCCCTGTTCTGCCTGGCAAACACAACTATGA  
GCGAACCCATAGCCGGACGATAGTCCCTAGCACGAGGCCTTCAAGTAGCTCTACCCCT  
AATAGCCACTTGATGGTTTATTTCTAGCCTAGCCAACCTAGCTCTTCCTCCTCTGCC  
AATCTTATGGGTGAACTAATAATTACTTCCCTATTCAACTGATCCTGATGAACCC  
TAGTACTAACGGGCGGGGGCACTTTAATTACAGCTGGTTATTCCCTTTATATATTCTT  
AATAACCCAACGAGGCCCTCTCCCGACACATATTATTGCACTTGAACCCTCTCATAC  
CCGAGAACACCTTCTTATTGCCTCCACCTAGTCCCCCTAATTCTGCTCGTTCTTAAGC  
CCGAACCTGATCTGAGGTTGGACTGCCTATGACCCCCACACACTTTGCCTTCTCCTCA  
GCCTTTTTTCTAGGTTTAACAGGCCTGGCATTCCACCGGTTCCACCTCCTCTCCGCCC  
TGTTATGCCTTGAAGGAATAATGTTATCCCTGTTTATTGCTCTCTCCCTATGAACACT  
CCAACCTCGACTCAACCAACTTCTCAGCATCTCCTATGCTCCTACTTGCAATTTTCAGCC  
TGTGAGGCAAGCGCCGGCCTCGCCCTACTGGTAGCCACCGCTCGAACCCACGGAAC

CGACCGACTACAAAGCCTAAATCTTCTCCAATGCTAAATGTACCCTACCTCCCTAAT  
GATTTCTCAAGCCTAATCACAATCTTTGCACTACTGGCTTATCCTCTAGTTACTACG  
ATTCAACCTGCACCTCGAGACCCTCAATGGGCTTCTACCCATGTCAAAACAGCTGTA  
AAAATAGCCTTCTTTGTCAGCCTATTACCCCTGGCCCTCTTTCTCCATGAAGGTGCCG  
AGACAATCATTACTAATACTGAACCTGAATAAACACTAATTCCTTCAACATCACTATCA  
GCCTAAAATTTGACTTCTACTCAATTATTTTTACACCCATTGCCCTTTACGTTACTTG  
ATCCATTTTAGAATTCGCATCATGGTACATGCACGCAGACCCACAAATGAACCGCTT  
CTTTAAATACCTCCTGACATTTCTGATTGCCATGATTATCCTGGTAACTGCAAACAAC  
ATATTCCAACCTATTTATCGGTTGAGAGGGTGTGGGAATTATGTCATTTCTCCTTATCG  
GATGGTGGTTCGGACGGGCAGATGCTAACACCGCAGCGCTTCAAGCAGTACTCTAT  
AACCGTGTGGGAGATATCGGACTTATCTTCGCTATGGCTTGAATAGCAGCAAACCTA  
AACTCCTGGGAAATACAACAAGTCTTTGCAGCCTCTAAGGACATAGACTTAACCTAC  
CCTCTCCTCGGGCTAATTATCGCAGCGACTGGCAAATCAGCCCAGTTTGGACTTCAC  
CCCTGACTACCCTCCGCTATGGAGGGTCCCACACCGGTCTCTGCCCTACTTCACTCTA  
GCACCATAGTCGTTGCCGGCATTTCCTGCTAGTACGAATGAGCCCCCTTTTGGA  
ACAACCCAACAGCCCTCACAACCTGCCTCTGCCTCGGAGCCCTCACAACATTATTTA  
CCGCAACCTGTGCCCTCACACAAAATGATATCAAGAAAATCATCGCATTTTCTACAT  
CCAGCCAGCTCGGACTCATAATGGTAACCATCGGACTAAACCAACCGCAACTAGCA  
TTCCTGCACATTTGCACACACGCCTTCTTCAAAGCCATACTATTCTTGTGCTCCGGAT  
CTATTATCCACAGCCTGAATGACGAACAAGACATTCGAAAAATGGGGGGCATAACAC  
CACCTTGCGCCTTATTCATCCTCCTGCCTAACTATTGGCAGCCTCGCCCTCACAGGGA  
CCCCCTTCTTGGCTGGTTTTCTTCTCTAAAGATGCCATTATCGAAGCATTAAACACATC  
CCACCTGAACGCCTGAGCCCTCACCTTAACCCTTCTAGCTACCTCTTTCACAGCAATT  
TACAGCTTTTCGAGTAATATTCTTTGTTCCCATAGGCTACCCCCGATTCACTGCCTTTC  
CCCAATCAACGAAAACAATCCAGCAGTAATCAACCCACTTAAACGACTAGCATGAG  
GGAGCATCATTGCAGGCTTACTTATTACCTCTAACATTACACCCCTAAAAACCCCTA  
TTATGTCTATACCCCCTCTCCTTAACTAGCTGCTCTTGCAGTTACAATTGCTGGCCT  
ACTTGTGGCCATAGAACTCGCCATATTAATAATAAGCAATACAAACCGATACCCG  
GCACAATATTCACCACTTCTCCGCCTTACTAGGCTTCTTCCCCGGAGTTATGCATCGC  
CTAACCCCTGTACTAGTCTTCTTTATAGGCCAAGACGTTGCCAACCACAGTAGAT  
CAAACCTGACTAGAAAAACGGGGCCCCAAAGCCATCGAGTCCTCTAACAAACCCCT  
GGTCTCTTCTACAAGTAACATCCAACGAGGAGTAATCAAAACATATCTCCCCTCTTC  
CTTCTAACACTAGCCCTTATAATCCCAATATTTATTACCTAATGACTTTTGTTATGTA  
CTTAGTTTTATTTCTTTTGTGTTAGGGTTAGTTGCAGTTGCTTCTAATCCGTCTCCTT  
ATTTTGCTGCTTTGGGTTTGGTTGTGGTAGCTGGTATGGGATGTGGTGTACTAGTTGG  
GCATGGGGGGCCTTTTTTATCATTAGTTTTATTCTTAATTTATTTGGGCGGGATGTTA  
GTTGTATTTGCATATTCAGCAGCATTAGCTGCTGAGCCGTACCCGGAGAGCTGGGGT  
AGTTGGTCGGTACTGGTTTATGGTCGTTTACACAGGAGGGGTAATGTAGTCTCAGGG  
TTGTTTTGAGGGGGGTGGTATGAATCGTCTTGGGTTTTAGCAGACGAGCTCGCGGAG  
TTTTCCGTGTTTCGGGGGGGATATTGGAGGTGTTGCCTTAATACTCTTCTGGGGGGT  
GGTTGCTAATCATTAGTGCGTGGGTACTACTCTTAACCCTATTTGTAGTTCTTGAGTT  
AACCGGGGAATAAGTCGAGGAGCGCTGCGGCGGTTA"/>

<sequence id="seq\_Verasper\_moseri\_LC5837471" spec="Sequence"  
taxon="Verasper\_moseri\_LC583747" totalcount="4"  
value="ATGATATTAAGCTTCTTTGACCAATTTATATCCCCAGTATGCCTTGGCATCCC  
ACTAATTGCACTAGCAATTAGCCTACCCTGAATTTTTTTTCCCGGCCCCCCAAACCGTT  
GATTAAACAACCGCGTGCTAACACTTCAAGGCTGATTTATGAGCAACTTCGCCTCAC  
AACTCCTTTTACCCTAAACCCTGGTGGTCACAAGTGAGCAATTCTATTTACCTCACT

AATGTTTTTTTTTCTATTAATATACTGGGTCTCCTCCCATATACCTTCACACCAACA  
ACTCAACTCTCGCTTAACCTAGGCTTCGCAGTTCCCCTCTGATTAGCAACTGTCATTA  
TGGAATACGTAATCAACCAACACATGCACTGGGACACCTTCTTCCAGAAGGCACCC  
CTACTGCCCTCATTCCTGTACTTATTATCATCGAGACAATTAGCCTATTCATTGCCCC  
CCTCGCTCTCGGTGTTTCGACTTACAGCAAATCTCACAGCGGGCCACTTACTCATTC  
ACTCATTGCAACGGCTGCCTTCGTCCTTCTTCCCCTAATACCCGTTGTTGCTATCTTA  
ACAACAGTAGTCCTCTTCCTCCTGACTCTACTAGAAATTGCCGTTGCCATGATTCAA  
GCCTATGTCTTCGTCCTACTCCTAAGCCTCTACCTACAAGAAAACGTTTAATGCCTCA  
ACTAAACCCACACCCTGATTTGCAATTTTAGTTTTCTCTTGAATAATCTTCCTAGTT  
GTAATTCCCCCAAAAATTTTAGCACACGTCTACCCTAATGAACCCACCTCCCAAAGC  
ACACAAAAATAAAACAGAACCCTGAACTGACCATGATATTAAGTGGCAATCACAC  
GATGATTTTTCTCGACCAATCACAAAGACATCGGCACCCTCTATCTCGTATTTGGTG  
CCTGAGCCGGAATAGTGGGGACAGGCCTAAGTCTACTCATTCGAGCAGAACTAAGC  
CAACCCGGGGCTCTCTTGGGGGACGACCAAATTTATAACGTAATCGTCACCGCACAC  
GCCTTTGTAATAATCTTCTTTATAGTTATACCCATTATGATCGGAGGATTCGGGA  
ACTGACTTATCCCCTTAATAATTGGAGCTCCAGACATGGCCTTCCCTCGAATGAATAACA  
TGAGCTTCTGACTTCTTCCCCCTCATTTCTTCTACTCCTAGCCTCTTCAGGTGTTGAA  
GCTGGGGCAGGAACAGGGTGGACCGTTTATCCTCCACTAGCTGGCAATTTAGCCCAC  
GCCGGGGCCTCCGTAGACCTAACAAATCTTTTCACTTCACCTTGCAGGAATTTATCA  
ATTCTGGGAGCAATTAACCTTTATTACTACTATCATCAACATAAAACCTACGACAGTA  
ACTATATACCAAATTCCATTATTTGTCTGAGCCGTAATAATTACAGCCGTTCTACTTC  
TTCTTTCCCTTCCCGTCTTAGCCGCAGGTATTACAATACTACTAACAGACCGAAACCT  
TAACACAACCTTCTTTGACCCCGCCGGAGGGGGTGACCCCATCCTCTATCAACATTT  
ATTCTGATTCTTTGGCCACCCGGAAGTATATATTCTCATTCTTCCAGGTTTCGGAATA  
ATTTCTCACATCGTAGCATACTACTCAGGTAAGAAAGAACCTTTTGGTTATATAGGA  
ATAGTCTGAGCTATGATAGCCATTGGACTCCTCGGATTTATTGTATGGGCCCATCAC  
ATGTTACAGTCGGGATAGATGTAGACACACGAGCCTATTTTACCTCTGCCACAATA  
ATCATTGCGATTCCAACCGGCGTAAAAGTCTTTAGTTGACTCGCAACCCTTCATGGA  
GGAAGCATTAATGAGAAACACCACTTCTTTGGGCTCTGGGCTTTATTTTCCTGTTTA  
CAGTAGGAGGACTTACCGGCATTGTCTTAGCTAATTCCTCTCTTGATATTGTCCTGCA  
TGACACATACTATGTGGTAGCCACTTCCACTATGTTCTATCTATGGGGGCTGTATTT  
GCAATCGTTGCTGCCTTCGTCCACTGATTCCCATTATTTTCAGGCTATACCCTTCACT  
CTACATGAACAAAAATTCACTTCGGCCTGATGTTTATCGGGGTAAATCTAACGTTCT  
TTCCCCAACACTTCCTAGGTCTGGCCGGAATACCTCGACGGTACTCAGACTACCCAG  
ACGCTTACACCCTTTGAAATACTGTCTCATCAATCGGATCTCTAATGTGCTCCTCGC  
TGTAATTTTATTTTATTTATTATTTGAGAAGCATTTACAGCCAAACGAGAAGTTAGC  
GCAGTAGAACTAACTACAATAATTGAATGACTTTACGGCTGCCCCCACCTTAC  
CACACATTTGAAGAGCCCGCATTTGTTCAAGTCCGAATAAGCTAAATGGCCCATCCC  
TCACAACCTTGGAATCCAAGACGCAGCTTCACCCTTAATAGAAGAATACTTCACTTC  
CACGATCACGCCTTAATAATTGTAATTCTTATCAGCACGATAGTACTATATATTATTG  
CGGCTATAGTCACAGCGAACTTACAGATAAACTTGTTCTAGACTCCCAAGAAATTG  
AGATCATCTGAACAGTTCTCCAGCTGTTATTCTTATCCTCATTGCCCTACCATCCGT  
CCGGATTTTATACTTAATAGACGAAATTAATGACCCTCACCTGACAATTAAAGCCTT  
AGGCCATCAGTGGTACTGAAGTTACGAGTATACAGACTACGAAGACCTCGGTTTTG  
ACTCTTACATAATTCTTACACAGGACCTTACCCCCGACAATTCCGACTTCTAGAGG  
CAGACCACCGAATAGTAATCCCCGTGGAATCTCCAATTCGTGTTCTTATTACAGCTG  
AAGATGTCCTGCATTCTGAGCAGTCCCCTCGCTGGGCGTAAAAGTCGACGCCGTGC  
CTGGTCGGTTAAACCAAGCAACCTTTATTGTCAGCCGACCAGGCGTATACTTCGGAC

AATGCTCTGAAATCTGCGGGGCAAACCATAGTTTTATGCCCATCGTTGTAGAAGCAG  
TCCCCCTTGAGCACTTCGAAAACCTGGTCTTCCCTAATAATTGAAGATGCCTATGGCC  
CATCAAGCACACCCATACCACATAGTCGACCCCAGCCCATGACCCCTCACGGGGGC  
TATCGCTGCCCTATTGATAACATCTGGCCTTGCTATCTGATTTCACTTCCATTCCACT  
GTTTTAATAACTATCGGAACAATCCTACTTATTTTAACAATCTTCCAGTGATGGCGA  
GACGTCGTACGAGAGGGCACATTTCAAGGACACCACACTCTTCCTGTTCAAAAAGG  
CCTCCGGTATGGTATAATCCTATTTATTACCTCAGAAGTTCTATTCTTCCTAGGCTTC  
TTCTGAGCCTTCTACCACTCGAGCCTAGCACCCACCCCTGAATTAGGAGGCTTTTGA  
CCACCAGCAGGCATTACACCCCTAGACCCATTTGAAGTCCCCTTCTTAATACAGCA  
GTCCTCCTTGCTTCTGGCGTGTCTGTTACCTGATCACATCACAGCATCATAGAGTGTA  
AACGAAAACAAGCTATCCACTCTCTTGCCCTTACAATTTTACTTGGGGGATACTTCA  
CTTTTCTTCAGGCTCTTGAATATCACGAAGCTCCCTTCACTATTGCTGACGGAGTTTA  
CGGTGCTACATTCTTTGTTGCCACTGGCTTCCACGGACTACACGTCTTAATTGGCTCA  
TCATTCTTAGCCGTTTGTGTTACGCCAAATTCTCCACCATTTTACATCAAACCACC  
ACTTTGGATTTGAAGCAGCCGCATGGTACTGACACTTCGTAGACGTCGTCTGACTCT  
TCCTGTACATCTCTATTTACTGATGAGGATCTTAATGGCCAGCCTACGCAAATCCCA  
CCCCCTTCTAAAAATCGCAAACGATGCTTTAATTGACCTCCCTGCCCCCTCTAATATC  
TCTGTTTGATGAAACTTTGGGTCTCTTCTGGGACTTTGCCTGGCTACTCAAATTGTGA  
CCGGCTTATTTTTAGCCATACACTATACGTCAGACATTGCTACTGCCTTCACCTCTAT  
TGCACATATCTGCCGGGACGTTAACTACGGTTGGCTTATCCGAAGCATTATGCCAA  
TGGCGCATCATTCTTTTTCAATTTGTATTTACCTTCATATCGGTTCGAGGTCTATATTAT  
GGCTCCTACCTCTATAAAGAAACATGAACTATCGGAGTTGTCCTGCTTCTTCTCGTA  
ATAATGACAGCTTTCGTTGGATACGTTCTCCCTTGGGGACAAATGTCGTTTTGAGGT  
GCAACCGTTATTACCAATCTTCTGTCCGCCATCCCTTATGTCGGTAACACCCTCGTCC  
AATGAATCTGGGGTGGCTTCTCCGTAGACAATGCTACCCTCACCCGGTTCTTTGCCTT  
CCACTTCCTTTTCCCCCTTATTATCGCAGCCGCAACAGTGATCCATCTTCTCTTCCTTC  
ACGAAACTGGCTCAAACAACCCACCGGGTTAAATTCAGATTCTGACAAGGTCCCTT  
TCCACCCTTACTTCACTTACAAGGACCTCTTGGCTTTGCAATCCTTCTTGCTGCACTA  
ACATCCCTTGCCCTGTTTTCCCCAAACCTTTTAGGGGACCCAGACAACTTTACCCCTG  
CAAATCCACTTGTTACTCCCCCACATATCAAGCCAGAATGATACTTCCTTTTTTGCTTA  
CGCTATCCTCCGCTCCATCCCAAACAAGCTTGGAGGCGTACTTGCCCTTTTATTTTCG  
ATTTTAGTCCTAATGCTCGTCCCCCTTCTCCATACCTCTAAACAGCGAAGCCTAATAT  
TCCGCCCTCTAACACAATTCTTATTCTGGTCACTAGTAGCAGACGTTATAATTCTAAC  
TTGAATTGGAGGCATACCTGTAGAACACCCCTTCGTCATCATTGGACAAGTAGCATC  
ACTCCTTTATTTTCGCTCTCTTCCTGGTCCTGATCCCAACAGCAGGTTGACTAGAGAAC  
AAAGTCCTCGGATGAAAATATGATTTCAACTCTCATTACGCATATTATCAACCCACT  
AACCTTTATTGTACCCGTATTGCTGGCCGTAGCATTCCTTACCCTCCTTGAACGGAAA  
GTACTAGGCTACATACAACCTCCGTAAAGGGCCAAACATCGTAGGACCTTACGGTCTC  
CTCCAACCCATTGCTGACGGCCTAAAACCTTTTATTAAAGAACCCGTTTCGACCTTCA  
ACCGCATCCCCCATCTTGTTCCCTCCTAGCCCCAATGCTCGCACTTACACTAGCCCTTA  
CCCTTTGAGCCCCCATAACCTTTCCCATACCCCGTCGTAGATCTTAACCTCGGTATTTT  
ATTTATTCTAGCACTGTCTAGCCTTGACGTGTAATCTATTCTGGGGTCCGGCTGGGCA  
TCCAATTCAAAATATGCCTTAGTGGGAGCACTTCGGGGCCGTTGCACAAACCATTTCC  
TACGAAGTCAGCCTAGGACTCATCTTACTAAATATCATTATCTTTACTGGGGGCTTC  
ACGCTCCAGACCTTTAATACAGCCCAAGAGGCCATCTGACTGGTAGTGCCTGCTTGA  
CCCCTAGCTGCCATATGATACATCTCCACTCTTGCCGAAACAAACCGTGCACCCTTC  
GACCTGACAGAGGGTGAATCCGAACCTTGTTTCAGGCTTCAACGTAGAATAACGCAGG  
CGGACCCTTCGCCCTATTCTTTTTAGCCGAATATTCCAACATCCTCCTAATAAATACT



CTGTCCGCGACACTATTTTTGGGGCGCCTCTCACATTCCATCTATCCCCGAATTAACCA  
GCATCAATATTATAACTAAAGCAGCCCTTCTATCAATCGTCTTCCTATGGGTCCGAG  
CTTCCTACCCCCGATTCCGTTATGACCAGCTCATACACCTCATCTGAAAAAACTTCCT  
CCCCCTAACTTTAGCTCTGGTTATTTGACACTTAGCGCTTCCCATCGCACTCGCTGGG  
CTCCCCCCCACAACCTGTAAATGAACCCCTACATCTTCGCCACCCTTCTATTTGGTTTGG  
GCTTAGGTACAACACTCACGTTTGCAAGCTCACACTGGCTCCTCGCTTGAATGGGCC  
TTGAAATTAATACACTAGCCATCATCCCCCTAATAGCCCAACATCACCACCCACGAG  
CAGTTGAAGCTACTACTAAGTATTTTCTCGCACAAGCCACAGCAGCCGCCACCCTCC  
TGTTTGCGAGTACTACCAACGCTTGACTCACCGGCCAATGGGATATTCAACAGATGA  
CACACCCGCTCCCCACAACCTATAATTGTTATTGCCCTAGCACTAAAAATTGGACTAG  
CACCAATACACTCTTGACTTCCAGAGGTTCTTCAAGGACTAGACCTCACCCTGGAC  
TAATCCTCTCGACCTGACAAAACTTGCCCCCTTTGCCCTCTTGTTGCAGATTCAAAC  
AACAAATCCTGTGCCCCCTAATCATTATTGGCTTGCTTTCTACCCTCGTTGGCGGCTGAG  
GTGGCCTTAACCAAACCCAATTACGTAAAATCCTTGCCATTTCCTCAATCGCTCACC  
TTGGCTGAATAGTACTGGTTCTTCAATTTTCACCACTCCTCAGTCTCCTCACCCTCCT  
CACGTACTTTCAATGACTTTTTCAACATTCTGGTCTTCAAAGTAAACAAGGCTACC  
ACTGTCAATACCCTCGCGATCTCGTGAACGAAAACCTCCCGTCCTCACAGCCCTGGCA  
CCTCTGGTTTTATTATCTCTGGGGCGGCCTTCCCCCTCTTACCGGCTTCATACCCAAGT  
GACTTATTCTCCAAGAATTGACTAAGCAAGACCTCCCACACTTGCCACCCTCGCTGC  
ATTAAGTGCCCTCCTGAGTCTTTACTTCTACTTGCGTCTCTCGTACGCAATAACCCTC  
ACAATATCCCCTAACAAACCTCATTGGTATTACTCCCTGACGATTCTACTCCCCCAGT  
TTACACTCCCCCTCGCCGTATCCACTGCAGCAGCCACACTTCTCCTCCCCTAGCACC  
AGCTGCCGTGGCACTACTCATCACCTATGAGCCTCCTTCTAACCATCCTTTCAATTGC  
TACTCTCCTCTCAACAGTACTTGCCATTGTATCCTTTTGACTACCCCAAATTATGCCA  
GACCATGAGAAGCTGTCACCATATGAATGCGGCTTTGACCCTATGGGCTCCGCCCCGA  
CTACCTTTTTCACTGCGATTTTTTCTCATTGCCATCCTTTTTCTTCTCTTCGACCTAGA  
AATTGCACTCCTCCTCCCCCTCCCCTGAGGGGACCAACTAGCATCACCCCTACTTAC  
ATTCACTTGAGCTACAGCTGTCCTAGCCCTCCTAACCCTTGGCCTCATTTATGAATGA  
GTACAAGGAGGCTTAGAATGAGCTGAATATGCTAAAAATTCTTATTCCAACACTCAT  
ACTTATTCCAACAGCCTGATTACTTAAACCCAGCCGACTCTGGCCGATTACCTTAAT  
GTATAGCTTTTGATCTCCTTGCTTAGCCTCTCGTGACTAAAAAACCTCTCAGAAACC  
GGCTGGTCGTCACTCAACCTATTTATGGCCACCGACTCCCTATCAACCCCCCTCCTCG  
TTCTTACATGCTGACTACTACCACTAATAATCTTAGCAAGTCAAAAGCACACAACCT  
CAGAACCCCTAAACCGCCAACGCATATACATTACACTTCTTGCTTCCTCCAGTTCTTC  
CTAATTCTAGCATTTAGCGCCACAGAACTAGTGATGTTCTACGTAATATTTGAGGCC  
ACCCTCATCCCCACACTAATCATTATCACCCGCTGGGGGAACCAAACAGAACGCTTA  
AATGCGGGGACCTATTTTCTCTTCTACACATTAGCAGGCTCACTTCCTCTCCTCGTTG  
CTTTACTCCTGCTTCAAAATACATCCGGCACCTTGCTTTATTAACCCTCCATTACAC  
AAATCCCCTCGCTCTCATCTTACGCAGACAAATTATGATGAGCAGGCTGTCTTCTAG  
CATTTCTAGTTAAAATAACCCCTCTATGGAGTCCACCTCTGACTTCCTAAAGCCCACGT  
TGAAGCCCCAATTGCAGGCTCAATGATCCTTGACGAGTTCCTTCTAAAACTAGGAGG  
ATACGGCATGATCCGAATAATAACAATGCTAGAACCTCTAACTAAGGAACCTAAGCT  
ACCCATTCAATTGTCTTTGCACTTTGAGGGGTTATTATGACCGGCTCAATTTGCCTACG  
ACAAACGGACCTCAAATCCCTGATTGCCTACTCATCTGTAAGCCACATGGGCCTGGT  
GGCTGGAGGCATTCTTATTCAGTCACCCTGAGGCTTAACGGGGGGCCCTTACCCTTAT  
AATCGCACATGGTCTTACCTCATCAGCCCTGTTCTGCCTGGCAAACACAACTATGA  
GCGAACCCATAGCCGGACGATAGTCTAGCACGAGGCCTTCAAGTAGCTCTACCCCT  
AATAGCCACTTGATGGTTTATTTCTAGCCTAGCCAACCTAGCTCTTCCTCCTCTGCC

AATCTTATGGGTGAACTAATAATTATTACTTCCCTATTCAACTGATCCTGATGAACCC  
TAGTACTAACGGGCGGGGGCACTTTAATTACAGCTGGTTATTCCCTTTATATATTCTT  
AATAACCCAACGAGGCCCTCTCCCGACACATATTATTGCACTTGAACCCTCTCATAC  
CCGAGAACACCTTCTTATTGCCTCCACCTAGTCCCCCTAATTCTGCTCGTTCTTAAGC  
CCGAAGTGAATCTGAGGTTGGACTGCCTATGACCCCCACACACTTTGCCTTCTCCTCA  
GCCTTTTTTCTAGGTTTAAACAGGCCTGGCATTCCACCGGTTCCACCTCCTCTCCGCC  
TGTTATGCCTTGAAGGAATAATGTTATCCCTGTTTATTGCTCTCTCCCTATGAACACT  
CCAACCTGACTCAACCAACTTCTCAGCATCTCCTATGCTCCTACTTGCATTTTCAGCC  
TGTGAGGCAAGCGCCGGCCTCGCCCTACTGGTAGCCACCGCTCGAACCCACGGAAC  
CGACCGACTACAAAGCCTAAATCTTCTCCAATGCTAAATGTACCCTACCTCCCTAAT  
GATTTCTCAAGCCTAATCACAATCTTTGCACTACTGGCTTATCCTCTAGTTACTACG  
ATTCAACCTGCACCTCGAGACCCTCAATGGGCTTCTACCCATGTCAAAACAGCTGTA  
AAAATAGCCTTCTTTGTCAGCCTATTACCCCTGGCCCTCTTTCTCCATGAAGGTGCCG  
AGACAATCATTACTAACTGAACCTGAATAAAACACTAATTCCTTCAACATCACTATCA  
GCCTAAAATTTGACTTCTACTCAATTATTTTTACACCCATTGCCCTTTACGTTACTTG  
ATCCATTTTAGAATTCGCATCATGGTACATGCACGCAGACCCACAAATGAACCGCTT  
CTTTAAATACCTCCTGACATTTCTGATTGCCATGATTATCCTGGTAACTGCAAACAAC  
ATATTCCAACCTATTTATCGGTTGAGAGGGTGTGGGAATTATGTCATTTCTCCTTATCG  
GATGGTGGTTCGGACGGGCAGATGCTAACACCGCAGCGCTTCAAGCAGTACTCTAT  
AACCGTGTGGGAGATATCGGACTTATCTTCGCTATGGCTTGAATAGCAGCAAACCTA  
AACTCCTGGGAAATACAACAAGTCTTTGCAGCCTCTAAGGACATAGACTTAACTAC  
CCTCTCCTCGGGCTAATTATCGCAGCGACTGGCAAATCAGCCCAGTTTGGACTTCAC  
CCCTGACTACCCTCCGCTATGGAGGGTCCACACCGGTCTCTGCCCTACTTCACTCTA  
GCACCATAGTCGTTGCCGGCATTTCCTGCTAGTACGAATGAGCCCCCTTTTGGAAA  
ACAACCCAACAGCCCTCACAACCTTGCTCTGCCTCGGAGCCCTCACAACATTATTTA  
CCGCAACCTGTGCCCTCACACAAAATGATATCAAGAAAATCATCGCATTTTCTACAT  
CCAGCCAGCTCGGACTCATAATGGTAACCATCGGACTAAACCAACCGCAACTAGCA  
TTCCTGCACATTTGCACACACGCCTTCTTCAAAGCCATACTATTCTTGTGCTCCGGAT  
CTATTATCCACAGCCTGAATGACGAACAAGACATTCGAAAAATGGGGGGCATAACAC  
CACCTTGCGCCTTATTCATCCTCCTGCCTAACTATTGGCAGCCTCGCCCTCACAGGGA  
CCCCCTTCTTGGCTGGTTTTCTTCTCTAAAGATGCCATTATCGAAGCATTAAACACATC  
CCACCTGAACGCCTGAGCCCTCACCTTAAACCCTTCTAGCTACCTCTTTCACAGCAATT  
TACAGCTTTCGAGTAATATTCTTTGTTCCCATAGGCTACCCCCGATTCACTGCCTTTC  
CCCAATCAACGAAAACAATCCAGCAGTAATCAACCCACTTAAACGACTAGCACGAG  
GGAGCATCATTGCAGGCTTACTTATTACCTCTAACATTACACCCCTAAAAACCCCTA  
TTATGTCTATACCCCCTCTCCTTAAACTAGCTGCTCTTGCAGTTACAATTGCTGGCCT  
ACTTGTGGCCATAGAACTCGCCATATTAATAATAAGCAATACAAACCGATACCCG  
GCACAATATTCACCACTTCTCCGCCTTACTAGGCTTCTTCCCCGGAGTTATGCATCGC  
CTAACCCCTGTACTAGTCTTCTTTATAGGCCAAGACGTTGCCAACCAAACAGTAGAT  
CAAACCTGACTAGAAAAAACGGGCCCCCAAAGCCATCGAGTCCTCTAACAAACCCCT  
GGTCTCTTCTACAAGTAACATCCAACGAGGAGTAATCAAAACATATCTCCCCTCTTC  
CTTCTAACACTAGCCCTTATAATCCCAATATTTATTACCTAATGACTTTTGTATGTA  
CTTAGTTTTATTTTCTTTTGTGTTAGGGTTAGTTGCAGTTGCTTCTAATCCGTCTCCTT  
ATTTTGCTGCTTTGGGTTTGGTTGTGGTAGCTGGTATGGGATGTGGTGTACTAGTTGG  
GCATGGGGGGCCTTTTTTATCATTAGTTTTATTCTTAATTTATTTGGGCGGGATGTTA  
GTTGTATTTGCATATTCAGCAGCATTAGCTGCTGAGCCGTACCCGGAGAGCTGGGGT  
AGTTGGTCGGTACTGGTTTATGGTCGTTTACACAGGAGGGGTAATGTAGTCTCAGGG  
TTGTTTTGAGGGGGGTGGTATGAATCGTCTTGGGTTTTAGCAGACGAGCTCGCGGAG

TTTTCCGTGTTTCGGGGGGATATTGGAGGTGTTGCCTTAATATACTCTTCTGGGGGGT  
GGTTGCTAATCATTAGTGCGTGGGTACTACTCTTAACCCTATTTGTAGTTCTTGAGTT  
AACCGGGGAATAAGTCGAGGAGCGCTGCGGCGGTTA"/>

<sequence id="seq\_Verasper\_variegatus\_DQ4037971" spec="Sequence"  
taxon="Verasper\_variegatus\_DQ403797" totalcount="4"  
value="ATGGTATTAAGCTTCTTTGACCAATTTATATCCCCAGTATGCCTTGGCATCCC  
ACTAATTGCACTAGCAATTAGCCTGCCCTGAATTTTTTTCCCAGCCCCAAAAACCGT  
TGATTAAACAACCGCCTGTAAACCCTTCAAGGCTGATTTATGAGCAACTTCACCTCA  
CAACTCCTTTTACCCCTAAACCCCGGTGGTCACAAGTGAGCAATTCTGTTTACCTCA  
CTAATGTTTTTTTCTTCTATCAATATACTGGGTCTCCTTCCATACACCTTTACACCAA  
CAACTCAACTCTCCCTAAACCTAGGCTTCGCAGTGCCCTCTGATTAGCAACTGTCA  
TTATGGGATACGCAATCAACCAACACATGCACTAGGACACCTTCTTCCAGAAGGTAC  
GCCCCGCTGCCCTCATTCCCGTACTTATTATTATCGAAACAATTAGCCTATTCATTGCG  
CCCCTCGCTCTCGGTGTTGCACTTACAGCAAATCTCACGGCAGGCCACTTACTCATT  
CAACTCATTGCAACAGCTGCCTTTGTCCTTCTTCCCCTAATACCCGTTGTTGCTGTCC  
TAACAACAGTAGTCCTCTTCTCCTGACTCTGCTAGAAATCGCCGTTGCCATGATTC  
AAGCCTATGTCTTCGTCCTACTCCTAAGCCTTTACCTACAAGAAAACGTTTAATGCCT  
CAACTGAACCCCGCACCCCTGATTTGCAATTTTAGTTTTCTTGAATAATCTTCCTAG  
TTGTAATCCCCCCTAAAATTTTAGCACACATCTACCCTAATGAGCCCACCTCCCAA  
GCACACAAAAATAAAACAGAATCCTGAAACTGACCATGGTATTAAGTGGCAATCAC  
ACGTTGATTTTTCTCGACCAATCACAAAGACATCGGCACCCTCTATCTCGTATTTGGT  
GCCTGAGCCGGAATAGTGGGGACAGGCCTTAGTCTACTTATTCGAGCAGAACTAAG  
CCAACCCGGGGCTCTCTTGGGGGACGACCAGATTTATAACGTAATCGTCACCGCACA  
CGCCTTTGTAATAATCTTCTTTATAGTTATACCCATTATGATCGGAGGATTCGGAAAC  
TGACTTATTCCATTAATAATTGGAGCCCCAGACATGGCCTTCCCTCGAATGAATAAC  
ATGAGCTTCTGACTTCTTCCCCCTCATTCTTCTACTCCTAGCCTCTTCAGGTGTTGA  
AGCTGGGGCAGGAACAGGGTGAACCGTTTATCCTCCACTAGCTGGCAATTTAGCCC  
ACGCCGGGGCCTCCGTAGACCTAACAATCTTTTCACTTCACCTTGCAGGAATTTTCAT  
CAATTCTGGGAGCAATTAACCTTTATTACTACTATCATCAACATAAAACCTACGACAG  
TAACTATGTACCAAATCCCGTTATTTGTCTGAGCCGTACTAATTACAGCCGTCCTACT  
TCTTCTTTCCCTTCCCGTCTTAGCCGCAGGAATTACAATGCTACTGACGGACCGAAA  
CCTTAACACGACCTTCTTTGACCCTGCCGGAGGGGGTGACCCTATCCTCTATCAACA  
TTTATTCTGATTCTTTGGTCACCCGGAAGTATATATCCTCATTCTTCCAGGTTTCGGA  
ATAATTTCTCACATCGTAGCATACTATTCAGGTAAGAAAGAACCTTTTGGTTATATG  
GGGATGGTGTGAGCTATAATGGCCATCGGACTCCTCGGATTTATCGTATGGGCCCAT  
CACATGTTACAGTCGGTATAGATGTAGACACACGAGCCTATTTTACCTCTGCCACA  
ATAATTATTGCGATTCCAACCGGCGTAAAAGTCTTTAGTTGGCTCGCAACCCTTCAT  
GGGGGAAGCATTAAATGAGAGACACCCTTCTTTGGGCGCTGGGCTTTATTTTCCTG  
TTTACAGTAGGAGGACTAACCGGCATTGTCTTAGCTAATTCTTCTCTTGATATTGTCC  
TACATGATACATACTATGTAGTAGCTCACTTCCACTATGTTCTATCCATAGGAGCTGT  
ATTTGCAATCGTTGCTGCCTTCGTCCACTGATTCCCATTATTTTCGGGCTATACCCTT  
CACTCTACATGAACAAAAATTCACTTCGGCCTGATGTTTATTGGGGTCAATCTAACA  
TTCTTCCCCAACACTTCCTAGGTCTGGCCGGAATACCTCGACGGTACTCAGACTAC  
CCAGACGCTTACACCCTTTGAAATACTGTCTCATCAATTGGATCCCTAATGTCGCTTA  
TCGCTGTAATTTTATTTTATTTATTATTTGAGAAGCATTTACAGCCAAACGAGAAGT  
TAGCGCAGTAGAACTAACTTCAACTAATATTGAATGACTCTACGGCTGCCCCCACC  
TTATCACACATTTGAAGAACCCGCATTTGTTCAAGTTCGAATTAATAATGGCTCA  
TCCTCACAACTCGGATTTCAAGACGCAGCTTCACCCTTAATAGAAGAACTACTTCA

CTTCCACGACCACGCCTTAATAGTTGTTATTCTTATTAGCACGATAGTACTATATATT  
ATTGCCGCTATAGTCACAGCGGAACCTTACAGATAAACTTGTTCTAGACTCCCAAGAA  
ATTGAAATCATCTGAACAGTTCTCCCAGCTGTGATTCTCATTCTTATTGCCCTACCAT  
CCCTCCGAATTTTATACTTGATAGACGAAATTAATGACCCTCACTTGACAATTAAAG  
CCATCGGCCATCAATGATACTGAAGTTACGAGTACACAGACTACGAAGACCTCGGT  
TTTGACTCTTACATAATTCCTACACAGGACCTTACTCCCGGGCAATTCCGACTTCTAG  
AGACAGACCACCGAATAGTAATCCCCGTAGAATCTCCAATTCGTGTTCTTATCTCAG  
CTGAAGATGTCCTTCATTCTGAGCAGTCCCCTCACTGGGCGTAAAAGTTGACGCCG  
TGCCTGGTCGCTTAAACCAAGCGACCTTTATCGTCAGCCGACCAGGCGTATACTTCG  
GACAATGCTCTGAAATCTGCGGGGCAAACCATAGTTTCATACCCATCGTTGTAGAAG  
CAGTCCCCCTTAAGCACTTTGAAAACCTGGTCTTCCCTAATAATTGAAGATGCCTATG  
GCCCATCAAGCACACCCATACCACATAGTCGACCCCAGCCCATGACCCCTCACAGG  
GGCTATCGCTGCCTTACTGATAACATCTGGCCTTGCTATCTGATTTCACTTCCACTCC  
ACTGTCTTAATAACTATCGGAACAATCCTACTTACTTTAACAATCTTCCAATGGTGA  
CGAGACGTCGTACGAGAGGGGCACATTTACAGGGACACCACACTCTTCCTGTCCAAAA  
AGGCCTCCGATATGGTATAATCCTATTTATTACCTCAGAAGTTCTATTTTTCTAGGC  
TTTTTCTGAGCCTTCTACCACTCAAGCCTGGCACCCACCCCTGAACTAGGAGGCTTTT  
GACCACCAGCAGGCATTACACCCCTAGACCCGTTTGAAGTCCCCTTCTTAACACAG  
CAGTCCCTCCTTGCTTCTGGCGTGACTGTTACCTGAGCACATCACAGCATCATAGAGG  
GTAAACGAAAACAAGCTATTCAGGCCCTTGCTCTTACAATCTTACTTGGGGGGTACT  
TCACTTTTCTCCAAGCCCTCGAATATCACGAAGCCCCCTTCACTATTGCAGACGGGG  
TTTATGGTGCTACATTTTTTTGTTGCCACTGGCTTCCACGGACTACACGTCTTAATCGG  
CTCATATTCTTAGCCGTTTGTGTTGTTACGCCAAATTCTCCACCATTTTACATCAAAC  
CACCCTTTGGATTTGAAGCAGCCGCATGGTACTGACACTTCGTAGACGTCGTCTGA  
CTCTTCCTCTACATCTCTATTTACTGATGAGGATCTTAATGGCCAGTCTACGCAAATC  
TCACCCCTTCTAAAAATCGCAAACGATGCTTTAGTTGACCTCCCTGCCCCCTCTAAT  
ATCTCTGTTTGATGGAACCTTTGGGTCCCTTCTAGGACTTTGCTTGGTTACTCAAATTG  
TAACCGGCTTATTTCTAGCCATACATTACACATCAGACATTGCTACTGCTTTTACCTC  
CGTCGCACATATCTGCCGAGACGTTAACTACGGTTGACTCGTCCGAAGCATCCATGC  
CAACGGCGCATCATTTTTTTTCATTTGTATTTACCTTCATATCGGCCGAGGCCTATAC  
TATGGCTCCTACCTCTATAAAGAAACATGAAATATCGGAGTTGTCCTCCTCCTCCTC  
GTAATAATAACAGCTTTCGTTGGATACGTCCCTCCCTTGAGGACAAATATCGTTTTGA  
GGTGCAACCGTTATTACCAATCTTCTGTCCGCCGTCCCTTATGTCGGCAACACCCTTG  
TCCAATGAATCTGAGGTGGCTTTTCCGTAGACAATGCTACCCTCACCCGGTTCTTTGC  
ATTCCACTTCCTCTTCCCATTTATTATCGCAGCCGCAACGGTGATTCATCTTCTCTTC  
CTTCACGAAACTGGCTCAAATAACCCACCCGGGTTGACTTCAGATTCCGACAAGGTC  
CCTTTCCACCCTTACTTCACTTACAAGGACCTCTTGGCTTTGCAGTCCTTCTTGCTGC  
ACTAGCATCCCTTGCCCTGTTTTCCCCGAACCTTTTAGGAGACCCAGACAACCTTACC  
CCCGCAAATCCACTTGTTACTCCTCCACATATCAAGCCAGAATGATACTTCCTCTTTG  
CTTACGCTATCCTCCGCTCCATCCCAAACAAACTTGAGGGCGTACTTGCCCTTTTGTT  
TTCGATCTTAGTTCTAATACTCGTCCCTCTTCTACATACCTCTAAACAGCGAAGTCTC  
ATATTCCGCCCTCTAACACAATTCTTATTCTGATCATTAGTCGCAGACGTTATAATTC  
TAACTTGAATTGGGGGAATACCCGTAGAGCACCCCTTCGTCATCATTGGTCAAATAG  
CATCACTCCTTTATTTCTCACTCTTCCTTATCCTAATCCCAGCAGCAGGTTGACTGGA  
GAACAAAGTGCTCGGATGAAAATATGATTTCAACTCTCATTACGCATATTATTAATC  
CATTAACTTTATTGTACCCGTATTGCTAGCCGTAGCATTCCCTACCCTCCTTGAACG  
AAAAGTACTAGGCTACATACAACCTCCGAAAAGGACCAAACATCGTAGGGCCTTACG  
GTCTCCTCCAACCCATTGCTGACGGCGTAAAACCTTTTATTAAAGAACCCGTTTCGAC

CTTCAACCGCATCCCCCATCTTGTTCCCTAGCCCCAATGCTCGCACTTACACTAGC  
CCTTGCCCTTTGAGCCCCTATACCTTTCCCATATCCTGTTGTAGATCTTAACCTCGGT  
ATTTTATTTATTCTGGCACTATCTAGCCTCGCAGTATACTCTATTTTGGGGTCCGGCT  
GAGCATCCAATTCAAAATATGCCTTAGTTGGGGCACTTCGGGCCGTTGCACAAACCA  
TTTCCTACGAAGTCAGCCTGGGACTCATCTTACTTAATATTATTATCTTTACCGGGGG  
CTTTACACTCCAGACCTTTAACACAGCACAAAGAGGCCATCTGACTAGTACTGCCTGC  
TTGACCCCTAGCTGCCATGTGATTCATCTCCACTCTTGCCGAAACAAACCGTGCTCC  
CTTCGACCTGACAGAGGGTGAATCCGAACCTTGCTCAGGCTTCAACGTAGAGTACGC  
AGGCGGGGCCCTTCGCCCTATTCTTTCTGGCCGAGTATTCAAACATCCTCCTAATAAA  
TACTCTGTCCGCGACACTATTTTTGGGCGCCTCTCACATTCCGTCTATCCCCGAATTA  
ACCAGCATCAATATTATAACTAAAGCAGCCCTTCTATCAATCGTCTTCCTGTGGGCC  
CGAGCTTCCTACCCCCGATTCCGTTATGACCAGCTCATACACCTCATCTGAAAAAAC  
TTCTCCCACTAACTTTAGCTCTGGTTATTTGACATTTAGCGCTTCCCATCGCATTTCG  
CTGGGCTTCCCCCACAACCTGTAAATGAACCCCTACATCTTGACCACCCTTCTATTTGG  
TTTAGGCTTGGGTACAACACTCACGTTTGCAAGCTCACACTGGCTCCTCGCTTGGAT  
GGGCCTTGAGATTAATACTAGCCATCATCCCCCTAATAGCCCACCATCACCACCC  
ACGAGCAGTTGAAGCTACTACTAAATATTTCTCGCACAAAGCCACAGCAGCCGCCA  
CCCTCCTGTTTGCAGTACTACTAACGCTTGACTCACCGGCCAATGGGATGTTCAAC  
AAATGACACACCCACTTCCCACAACCTATAATTGTTATTGCCCTAGCACTAAAAATTG  
GACTAGCACCAATGCACTCTTGACTCCCGGAAGTTCTTCAAGGACTAGACCTCACCA  
CTGGACTAATCCTCTCAACCTGACAAAAACTTGCCCCCTTTACCCTTTTGTTACAAAT  
CCAGATAACAATCCTATGCCCCTAATCATTATTGGCTTACTTTCTACCCTCATTGGCG  
GCTGAGGTGGCCTCAACCAAACCCAATTACGTAAGATCCTTGCCCTATTCCTCAATCG  
CTCACCTTGGCTGAATAGTACTGATTCTTCAATTTTCACCACTCCTCAGTCTCCTCAC  
CCTCCTCACGTACTTTCCATGACTTTTTCAACATTCTTAATCTTCAAAGTAAACAAGG  
CTACCACTATCAATACCCTCGCAATCTCGTGAACAAAACTCCTGTCTCCTCACAGCCC  
TAGCACCTCTCGTCTTATTATCTCTGGGCGGCCTTCCCCCTCTAACCGGCTTCATACC  
CAAATGATTTATTCTCCAAGAATTAATAAGCAAGACCTCCCACGCTTGCCACCCTC  
ACTGCATTAACCTGCCCTCCTGAGTCTTTACTTCTACTTACGTCTCTCATACGCAATAA  
CCCTCACAAATGTTCCCTAACAACCTCATTGGTATTACTCCCTGACGATTCTACTCCCC  
CCAATCAACCCTCCCCCTCGCCGTATCCACTGCAGCAACCACACTTCTCCTCCCACT  
AGCACCAGCTGCCCTAGCACTACTCATCACCTATGAGCCTCCTTCTAACCATCCTTTC  
AATTGCTTCCCTCCTCTCAACAGTACTTGCCATTGTATCCTTTTGACTACCCCAAATT  
ATTCCAGACCATGAAAAGCTATCACCATATGAATGCGGCTTTGACCCTATGGGGTCC  
GCCCCGACTACCTTTTTCACTGCGATTTTTTCTCATTGCCATCCTTTTTCTTCTCTCGA  
CCTAGAGATTGCTCTCCTCCTCCCCCTCCCCTGAGGAGACCAACTAGCTTCACCATT  
GCTTACATTCACCTGAGCTACAGCTGTCTAGCCCTCCTAACCCCTTGGCCTCATTTAT  
GAATGAGTTCAAGGAGGCTTAGAATGGGCTGAATATGCTAAAAATTCTTATTCCAAC  
ACTTATACTTATTCCAACAGCCTGGTTGCTCAAACCCAGCCAACCTCTGACCCATTAC  
CTTAATGTATAGCTTTTGCATCTCCTTACTTAGCCTCTCGTGACTAAAAAACCTCTCA  
GAAACCGGCTGATCGTCACTCAACCTATTTATGGCCACCGACCCCCTATCAAAACCT  
CTCCTCGTTCTTACATGCTGACTGCTCCCCTAATGATCTTAGCAAGTCAGAAACAC  
ACAGCCTCAGAGCCCCTCAACCGCCAGCGCATGTACATCACGCTTCTCTCTTCTCCTCC  
AGTTCTTCCTAATTCTAGCATTTAGCGCCACAGAACTAGTAATGTTCTACGTAATATT  
TGAAGCTACCCTCATCCCCACACTAATCATTATTACCGCTGGGGAAACCAAACAGA  
ACGCTTAAATGCAGGAACCTATTTTCTTCTACACATTAGCAGGCTCACTTCCTCTC  
CTCGTTGCTTTACTTCTACTTCAAAATTCATCCGGCACCTTATCTTTATTAACCCCTCC  
ATTACACAAACCCCTCGCTCTCATCTTACGCAGACAAATTATGATGAGCAGGCTGT

CTTCTAGCATTCTTAGTTAAAATGCCCCCTCTATGGAGTCCACCTCTGACTTCCTAAGG  
CCCACGTTGAAGCCCCAATTGCAGGCTCAATAATCCTTGCAGCGGTCCTTCTAAAAC  
TAGGAGGGTACGGCATAATCCGCATAATGACAATGCTAGAACCTCTAACTAAGGAA  
CTAAGCTACCCATTCAATTGTCTTTGCACTTTGAGGGGTTATTATGACCGGCTCAATTT  
GCCTGCGACAAACGGACCTCAAATCCCTAATTGCCTACTCATCTGTAAGCCACATGG  
GTCTAGTGGCCGGGGGCATTCTTATTCAATCACCTGGGGCTTAACGGGGGGCCCTTA  
CCCTTATGATCGCACATGGTCTTACCTCATCAGCCCTCTTCTGCCTGGCAAACACAA  
ACTATGAACGAACCCATAGCCGGACGATAGTCCTAGCACGGGGCCTTCAAGTAGCT  
CTACCCCTGATAGCCACTTGATGGTTTATTTCTAGCCTGGCCAACCTGGCTCTTCCTC  
CCCTACCCAATCTCATGGGTGAACTAATAATTATCACTTCCCTGTTCAACTGATCCTG  
ATGAACCCTGGTATTAACGGGTGGGGGTACTTTAATTACAGCTGGTTATTCCCTCTA  
CATATTCTTAATAACCCAACGAGGCCCTCTCCCAACACATGTTATTGCACTTGAACC  
CTCTCATACCCGAGAACACCTTCTTATTGCCTTCACCTAGTCCCCCTAATTCTACTCG  
TTCTTAAGCCCGAACTGATCTGAGGTGGACTGCCTATGACCCCCACACACTTTGCC  
TTCTCCTCAGCCTTTTTTCTAGGTTTAACAGGCCTGGCATTCCACCGGTTCCACCTCC  
TCTCCGCCCTATTATGCCTTGAAGGAATAATATTATCCCTGTTTATTGCTCTCTCCCT  
GTGGACACTCCAGCTTGACTCAACCAACTTCTCAGCATCTCCTATGCTCCTACTTGCA  
TTTTCAGCCTGTGAAGCAAGCGCCGGCCTCGCCCTTCTGGTAGCCACCGCTCGAACC  
CACGGAACCGACCGACTACAAAGCCTAAACCTTCTACAATGCTAAATGTACTCTACC  
TCCCTCATGATTTCCCTCAAGCCTGATTACGATCTTTGCACTACTGGCTTATCCTCTCA  
TACTACGATTACGCCTGCACCTCAAAACCTCAATGAGCTTCTACCCATGTCAAAA  
CAGCTGTAAAAATAGCCTTCTTTGTTAGCCTTTTACCCCTCGCCCTCTTTCTCCATGA  
AGGTGCCGAAACAATCATTCTGACTGAACCTGAATAAAACACTAACTCCTTCAACAT  
TACTATCAGCCTAAAATTTGACTTCTACTCAATTATTTTCACACCCATTGCCCTTTAC  
GTTACTTGGTCCATTTTAGAATTCGCATCATGATATATGCATGCAGACCCACAAATG  
AACCGCTTCTTTAAATACCTCCTGACATTTCTGATTGCCATGATTATCCTAGTAACCG  
CAAACAACATATTCCAACATTTATCGGTTGGGAAGGTGTGGGAATTATATCATTTT  
TCCTTATCGGGTGGTGGTTCGGACGGGCAGATGCTAACACCGCTGCACTCCAAGCAG  
TGCTCTATAACCGTGTGGGGGATATCGGGCTTATCTTTGCTATGGCTTGAATAGCAG  
CAAACCTAAACTCCTGGGAAATACAACAAGTCTTTGCAGCCTCTAAAAACATAGAC  
TTAACCTACCCCTCCTCGGACTAATCATCGCAGCAACTGGCAAATCAGCCCAATTT  
GGACTGCACCCCTGGCTGCCCTCCGCTATGGAGGGCCCCACACCGGTCTCTGCCCTA  
CTTCACTCTAGCACCATAGTCGTTGCCGGCATTTCCTGCTAGTACGAATGAGCCCC  
CTTATGGAGAACAACCCAACAGCCCTCACAACTTGCCTATGCCTCGGAGCCCTCACA  
ACATTTTTTACC GCAACCTGTGCCCTCACACAAAATGACATTAAAAAAATCATCGCA  
TTTTCTACATCCAGCCAGCTCGGACTCATAATGGTAACCATTTGGGCTAAACCAACCA  
CAACTAGCATTCTCCACATTTGCACACACGCCTTCTTCAAAGCCATACTATTTTTAT  
GCTCCGGATCTATTATTCACAGCCTAAATGACGAACAAGACATTCGAAAAATAGGG  
GGCATAACACCACCTTGCGCCTTATTCATCCTCCTGCCTAACTATTGGCAGCCTTGCCC  
TCACAGGAACCCCTTCTTGGCTGGTTTCTTCTCTAAAGATGCCATTATCGAAGCATT  
AAACACATCTCACCTGAACGCCTGAGCCCTCACCTTAACTCTCCTAGCCACCTCTTTC  
ACAGCAATTTACAGCTTTCGAGTAATATTCTTTGTGCCTATGGGCTACCCCGATTG  
CTGCCTCTCCCCAATCAACGAAAATAACCCAGCAGTAATCAACCCACTCAAGCGCCT  
AGCATGAGGAAGCATCATTGCAGGCTTACTTATTACCTCTAACATTACACCCCTAAA  
AACCCCTATTATATCTATACCCCTCTCCTTAACTAGCTGCTCTTGCAGTTACAATT  
GCTGGCCTGCTTGTGGCCATAGAGCTCGCCGCATTAACTAGTAAACATTACGAACCA  
ATGCCCCGACACAATATTCATCACTTCTCCACCTTACTAGGCTTCTTCCCCGGGGTTAT  
GCATCGCCTAACCCCCATACTAGCCTTCTTCATAGGCCAAAACGTTGCCAACCACAAAC

AGTAGATCAAACCTGATTAGAAAAGACAGGCCCCAAAGCCATCGAATCCTCTAACA  
AACCTCTGATTTCTCTACAAGTAACATCCAACGAGGACTGATCAAAACATACCTCC  
CCTCTTCCTTCTAACGCTAGCCCTCATAGTCCCAATATTTATTACCTAATGACTTTTG  
TTATGTATTTAGTTTTATTTCTCTTGTGTTAGGGTTAGTTGCGGTTGCTTCTAATCCG  
TCTCCTTATTTGCTGCTTTAGGTTTAGTTGTGGTAGCTGGTATGGGGTGTGGTGTGC  
TAGTCGGGCATGGGGGGCCTTTTTATCATTAGTTTTATTCTTAATTTATTTGGGCGG  
GATGTTGGTTGTATTTGCATATTCAGCAGCGTTAGCTGCCGAGCCGTATCCGGAGAG  
CTGGGGTAGTTGATCGGTGCTGGTTTATGGTTATTTACATAGGAGGAGTAATGTCGT  
TTCAGGGTTGTTTTGAGGGGGGTGGTACGAATCGTCTTGGGTTTTAGCAGACGAGTT  
GGGGGAGTTTTCCGTGTTTCGGGGTGATATTGGGGGTGTTGCTTTAATACTCCTCT  
GGGGGGTGGTTGTTAATTATTAGTGCGTGGGTGCTACTTTAACTTTATTTGTAGTTC  
TTGAGCTGACCGCGGGATAAGTCGAGGAGCGTTGCGGCGGTTA"/>

<sequence id="seq\_Verasper\_variegatus\_MK2105711" spec="Sequence"  
taxon="Verasper\_variegatus\_MK210571" totalcount="4"  
value="ATGGTATTAAGCTTCTTTGACCAATTTATATCCCCAGTATGCCTTGGCATCCC  
ACTAATTGCACTAGCAATTAGCCTGCCCTGAATTTTTTTCCAGCCCCAAAAACCGT  
TGATTAAACAACCGCCTGTAAACCCTTCAAGGCTGATTTATGAGCAACTTCACCTCA  
CAACTCCTTTTACCCCTAAACCCCGGTGGTCACAAGTGAGCAATTCTGTTTACCTCA  
CTAATGTTTTTTTCTTCTATCAATATACTGGGTCTCCTTCCATACACCTTTACACCAA  
CAACTCAACTCTCCCTAAACCTAGGCTTCGCAGTGCCCCTCTGATTAGCAACTGTCA  
TTATGGGATACGCAATCAACCAACACATGCACTAGGACACCTTCTTCCAGAAGGTAC  
GCCCCGTGCCCTCATTCCCGTACTTATTATTATCGAAACAATTAGCCTATTCATTGCG  
CCCCTCGCTCTCGGTGTTTCGACTTACAGCAAATCTCACGGCAGGCCACTTACTCATT  
CAACTCATTGCAACAGCTGCCTTTGTCCTTCTTCCCCTAATACCCGTTGTTGCTGTCC  
TAACAACAGTAGTCCTCTTCTCCTGACTCTGCTAGAAATCGCCGTTGCCATGATTC  
AAGCCTATGTCTTCGTCCTACTCCTAAGCCTTTACCTACAAGAAAACGTTTAATGCCT  
CAACTGAACCCCGCACCCCTGATTTGCAATTTTAGTTTTCTCTTGAATAATCTTCCTAG  
TTGTAATCCCCCCTAAAATTTTAGCACACATCTACCCTAATGAGCCCACCTCCCAAA  
GCACACAAAAATAAAACAGAATCCTGAAACTGACCATGGTATTAAGTGGCAATCAC  
ACGTTGATTTTTCTCGACCAATCACAAAGACATCGGCACCCTCTATCTCGTATTTGGT  
GCCTGAGCCGGAATAGTGGGGACAGGCCTTAGTCTACTTATTCGAGCAGAACTAAG  
CCAACCCGGGGCTCTCTTGGGGGACGACCAGATTTATAACGTAATCGTCACCGCACA  
CGCCTTTGTAATAATCTTCTTTATAGTTATACCCATTATGATCGGAGGATTCGGAAAC  
TGACTTATTCCATTAATAATTGGAGCCCCAGACATGGCCTTCCCTCGAATGAATAAC  
ATGAGCTTCTGACTTCTTCCCCCTCATTTCTTCTACTCCTAGCCTCTTCAGGTGTTGA  
AGCTGGGGCAGGAACAGGGTGAACCGTTTATCCTCCACTAGCTGGCAATTTAGCCC  
ACGCCGGGGCCTCCGTAGACCTAACAATCTTTTCACTTCACCTTGACAGGAATTTTCA  
CAATTCTGGGAGCAATTAACCTTTATTACTACTATCATCAACATAAAACCTACGACAG  
TAACTATGTACCAAATCCCGTTATTTGTCTGAGCCGTACTAATTACAGCCGTCCTACT  
TCTTCTTTCCCTTCCCGTCTTAGCCGCAGGAATTACAATGCTACTGACGGACCGAAA  
CCTTAACACGACCTTCTTTGACCCTGCCGGAGGGGGTGACCCTATCCTCTATCAACA  
TTTATTCTGATTCTTTGGTACACCGGAAGTATATATCCTCATTCTTCCAGGTTTCGGA  
ATAATTTCTCACATCGTAGCATACTATTCAGGTAAGAAAGAACCTTTTGGTTATATG  
GGGATGGTGTGAGCTATAATGGCCATCGGACTCCTCGGATTTATCGTATGGGCCCAT  
CACATGTTACAGTCGGTATAGATGTAGACACACGAGCCTATTTTACCTCTGCCACA  
ATAATTATTGCGATTCCAACCGGCGTAAAAGTCTTTAGTTGGCTCGCAACCCTTCAT  
GGGGGAAGCATTAAATGAGAGACACCACTTCTTTGGGCGCTGGGCTTTATTTTCCTG  
TTTACAGTAGGAGGACTAACCGGCATTGTCTTAGCTAATTCTTCTCTTGATATTGTCC

TACATGATACATACTATGTAGTAGCTCACTTCCACTATGTTCTATCCATAGGAGCTGT  
ATTTGCAATCGTTGCTGCCTTCGTCCACTGATTCCCCTATTTTCGGGCTATACCCTT  
CACTCTACATGAACAAAAATTCCTTCGGCCTGATGTTTATTGGGGTCAATCTAACA  
TTCTTCCCCAACACTTCCTAGGTCTGGCCGGAATACCTCGACGGTACTCAGACTAC  
CCAGACGCTTACACCCTTTGAAATACTGTCTCATCAATTGGATCCCTAATGTGCTTA  
TCGCTGTAATTTTATTTTATTTATTATTTGAGAAGCATTACAGCCAAACGAGAAGT  
TAGCGCAGTAGAACTAACTTCAACTAATATTGAATGACTCTACGGCTGCCCCCACC  
TTATCACACATTTGAAGAACCCGCATTTGTTCAAGTTCGAATTAATAATGGCTCA  
TCCCTCACAACCTCGGATTTCAAGACGCAGCTTCACCCTTAATAGAAGAACTACTTCA  
CTTCCACGACCACGCCTTAATAGTTGTTATTCTTATTAGCACGATAGTACTATATATT  
ATTGCCGCTATAGTCACAGCGGAACCTTACAGATAAACTTGTCTAGACTCCCAAGAA  
ATTGAAATCATCTGAACAGTTCTCCAGCTGTGATTCTCATTCTTATTGCCCTACCAT  
CCCTCCGAATTTTATACTTGATAGACGAAATTAATGACCCTCACTTGACAATTAAG  
CCATCGGCCATCAATGATACTGAAGTTACGAGTACACAGACTACGAAGACCTCGGT  
TTTGACTCTTACATAATTCCTACACAGGACCTTACTCCCGGGCAATTCCGACTTCTAG  
AGACAGACCACCGAATAGTAATCCCCGTAGAATCTCCAATTCGTGTTCTTATCTCAG  
CTGAAGATGTCCTTCATTCCTGAGCAGTCCCCTCACTGGGCGTAAAAGTTGACGCCG  
TGCTTGGTTCGCTTAAACCAAGCGACCTTTATCGTCAGCCGACCAGGCGTATACTTCG  
GACAATGCTCTGAAATCTGCGGGGCAAAACCATAGTTTCATACCCATCGTTGTAGAAG  
CAGTCCCCCTTAAGCACTTTGAAAACCTGGTCTTCCCTAATAATTGAAGATGCCTATG  
GCCATCAAGCACACCCATACCACATAGTCGACCCCAGCCCATGACCCCTCACAGG  
GGCTATCGCTGCCTTACTGATAACATCTGGCCTTGCTATCTGATTTCACTTCCACTCC  
ACTGTCTTAATAACTATCGGAACAATCCTACTTACTTTAACAATCTTCCAATGGTGA  
CGAGACGTCGTACGAGAGGGCACATTTACAGGGACACCACACTCTTCCTGTCCAAAA  
AGGCCTCCGATATGGTATAATCCTATTTATTACCTCAGAAGTTCTATTTTCTAGGC  
TTTTTCTGAGCCTTCTACCACTCAAGCCTGGCACCCACCCCTGAACTAGGAGGCTTTT  
GACCACCAGCAGGCATTACACCCCTAGACCCGTTTGAAGTCCCCTTCTTAACACAG  
CAGTCCCTCCTTGCTTCTGGCGTGACTGTTACCTGAGCACATCACAGCATCATAGAGG  
GTAAACGAAAACAAGCTATTCAGGCCCTTGCTCTTACAATCTTACTTGGGGGGTACT  
TCACTTTTCTCCAAGCCCTCGAATATCACGAAGCCCCCTTCACTATTGCAGACGGGG  
TTTATGGTGCTACATTTTTTGTGTTGCCACTGGCTTCCACGGACTACACGTCTTAATCGG  
CTCATATTCTTAGCCGTTTGTGTTGTTACGCCAAATTCTCCACCATTTTACATCAAAC  
CACCACCTTGGATTTGAAGCAGCCGCATGGTACTGACACTTCGTAGACGTCGTCTGA  
CTCTTCCTCTACATCTCTATTTACTGATGAGGATCTTAATGGCCAGTCTACGCAAATC  
TCACCCCTTCTAAAAATCGCAAACGATGCTTTAGTTGACCTCCCTGCCCCCTCTAAT  
ATCTCTGTTTGATGGAACCTTTGGGTCCCTTCTAGGACTTTGCTTGGTTACTCAAATTG  
TAACCGGCTTATTTCTAGCCATACATTACACATCAGACATTGCTACTGCTTTTACCTC  
CGTCGCACATATCTGCCGAGACGTTAACTACGGTTGACTCGTCCGAAGCATCCATGC  
CAACGGCGCATCATTTTTTTTCAATTTGTATTTACCTTCATATCGGGCCGAGGCCTATAC  
TATGGCTCCTACCTCTATAAAGAAACATGAAATATCGGAGTTGTCCTCCTCCTCCTC  
GTAATAATAACAGCTTTCGTTGGATACGTCCTCCCTTGAGGACAAATATCGTTTTGA  
GGTGCAACCGTTATTACCAATCTTCTGTCCGCCGTCCTTATGTCGGCAACACCCTTG  
TCCAATGAATCTGAGGTGGCTTTTCCGTAGACAATGCTACCCTCACCCGGTTCTTTGC  
ATTCCACTTCCTCTTCCCATTTATTATCGCAGCCGCAACGGTGATTCATCTTCTCTTC  
CTTCACGAACTGGCTCAAATAACCCACCGGGTTGACTTCAGATTCCGACAAGGTC  
CCTTTCCACCCTTACTTCACTTACAAGGACCTCTTGGCTTTGCAGTCCTTCTTGCTGC  
ACTAGCATCCCTTGCCCTGTTTTCCCCGAACCTTTTAGGAGACCCAGACAACCTTACC  
CCCGCAAATCCACTTGTTACTCCTCCACATATCAAGCCAGAATGATACTTCCTCTTTG



CTTACGCTATCCTCCGCTCCATCCCAAACAAACTTGGAGGCGTACTTGCCCTTTTGT  
TTCGATCTTAGTTCTAATACTCGTCCCTCTTCTACATACCTCTAAACAGCGAAGTCTC  
ATATTCCGCCCTCTAACACAATTCTTATTCTGATCATTAGTCGCAGACGTTATAATTC  
TAACTTGAATTGGGGGAATACCCGTAGAGCACCCCTTCGTCATCATTGGTCAAATAG  
CATCACTCCTTTATTTCTCACTCTTCCTTATCCTAATCCCAGCAGCAGGTTGACTGGA  
GAACAAAGTGCTCGGATGAAAATATGATTTCAACTCTCATTACGCATATTATTAATC  
CATTAACCTTTATTGTACCCGTATTGCTAGCCGTAGCATTCCCTTACCCTCCTTGAACG  
AAAAGTACTAGGCTACATACAACTCCGAAAAGGACCAAACATCGTAGGGCCTTACG  
GTCTCCTCCAACCCATTGCTGACGGCGTAAACTCTTTATTAAAGAACCCGTTTCGAC  
CTTCAACCGCATCCCCCATCTTGTTCCCTCCTAGCCCCAATGCTCGCACTTACACTAGC  
CCTTACCCTTTGAGCCCCCTATACCTTTCCCATATCCTGTTGTAGATCTTAACCTCGGT  
ATTTTATTTATTCTGGCACTATCTAGCCTCGCAGTATACTCTATTTTGGGGTCCGGCT  
GAGCATCCAATTCAAAATATGCCTTAGTTGGGGCACTTCGGGGCCGTTGCACAAACCA  
TTTCCTACGAAGTCAGCCTGGGACTCATCTTACTTAATATTATTATCTTTACCGGGGG  
CTTTACACTCCAGACCTTTAACACAGCACAAAGAGGCCATCTGACTAGTACTGCCTGC  
TTGACCCCTAGCTGCCATGTGATTCATCTCCACTCTTGCCGAAACAAACCGTGCTCC  
CTTCGACCTGACAGAGGGTGAATCCGAACTTGTCTCAGGCTTCAACGTAGAGTACGC  
AGGCGGGGCCCTTCGCCCTATTCTTTCTGGCCGAGTATTCAAACATCCTCCTAATAAA  
TACTCTGTCCGCGACACTATTTTTGGGCGCCTCTCACATTCCGTCTATCCCCGAATTA  
ACCAGCATCAATATTATAACTAAAGCAGCCCTTCTATCAATCGTCTTCCTGTGGGCC  
CGAGCTTCCTACCCCCGATTCCGTTATGACCAGCTCATAACCTCATCTGAAAAAAC  
TTCTCCCACTAACTTTAGCTCTGGTTATTTGACATTTAGCGCTTCCCATCGCATTTCG  
CTGGGCTTCCCCCACAACCTGTAAATGAACCCCTACATCTTGACCACCCTTCTATTTGG  
TTTAGGCTTGGGTACAACACTCACGTTTGCAAGCTCACACTGGCTCCTCGCTTGGAT  
GGGCCTTGAGATTAATACACTAGCCATCATCCCCCTAATAGCCCACCATCACCACCC  
ACGAGCAGTTGAAGCTACTACTAAATATTTCCCTCGCACAAAGCCACAGCAGCCGCCA  
CCCTCCTGTTTGCAGTACTACTAACGCTTGACTCACCGGCCAATGGGATGTTCAAC  
AAATGACACACCCACTTCCCACAACCTATAATTGTTATTGCCCTAGCACTAAAAATTG  
GACTAGCACCAATGCACTCTTGACTCCCGGAAGTTCTTCAAGGACTAGACCTCACCA  
CTGGACTAATCCTCTCAACCTGACAAAAACTTGCCCCCTTTACCCTTTTGTACAAAT  
CCAGATAACAATCCTATGCCCCTAATCATTATTGGCTTACTTTCTACCCTCATTGGCG  
GCTGAGGTGGCCTCAACCAAACCCAATTACGTAAGATCCTTGCCCTATTCTCAATCG  
CTCACCTTGGCTGAATAGTACTGATTCTTCAATTTTCACCACTCCTCAGTCTCCTCAC  
TCTCCTCACGTACTTTCCATGACTTTTTCAACATTCCTAATCTTCAAAGTAAACAAGG  
CTACCACTATCAATACCCTCGCAATCTCGTGAACAAAAACTCCTGTCTCAGAGCCC  
TAGCACCTCTCGTCTTATTATCTCTGGGCGGCCCTTCCCCCTTAACCGGCTTCATACC  
CAAATGATTTATTCTCCAAGAATTAACCTAAGCAAGACCTCCCACGCTTGCCACCCTC  
ACTGCATTAACCTGCCCTCCTGAGTCTTTACTTCTACTTACGTCTCTCATACGCAATAA  
CCCTCACAAATGTTCCCTAACAACCTCATTGGTATTACTCCCTGACGATTCTACTCCCC  
CCAATCAACCCTCCCCCTCGCCGTATCCACTGCAGCAACCACACTTCTCCTCCCACT  
AGCACAGCTGCCCTAGCACTACTCATCACCTATGAGCCTCCTTCTAACCATCCTTTC  
AATTGCTTCCCTCCTCTCAACAGTACTTGCCATTGTATCCTTTTGACTACCCCAAATT  
ATTCCAGACCATGAAAAGCTATCACCATATGAATGCGGCTTTGACCCTATGGGGTCC  
GCCCCACTACCTTTTTCACTGCGATTTTTTCTCATTGCCATCCTTTTTCTTCTCTCGA  
CCTAGAGATTGCTCTCCTCCTCCCCCTCCCCTGAGGAGACCAACTAGCTTCACCATT  
GCTTACATTCACCTGAGCTACAGCTGTCTTAGCCCTCCTAACCCTTGGCCTCATTTAT  
GAATGAGTTCAAGGAGGCTTAGAATGGGCTGAATATGCTAAAAATTCTTATTCCAAC  
ACTTATACTTATTCCAACAGCCTGGTTGCTCAAACCCAGCCAACCTCTGACCCATTAC

CTTAATGTATAGCTTTTGCATCTCCTTACTTAGCCTCTCGTGACTAAAAACCTCTCA  
GAAACCGGCTGATCGTCACTCAACCTATTTATGGCCACCGACCCCCTATCAAAACCT  
CTCCTCGTTCTTACATGCTGACTGCTCCCACTAATGATCTTAGCAAGTCAGAAACAC  
ACAGCCTCAGAGCCCCCTCAACCGCCAGCGCATGTACATCACGCTTCTCTCTTCCTCC  
AGTTCTTCCTAATTCTAGCATTTAGCGCCACAGAACTAGTAATGTTCTACGTAATATT  
TGAAGCTACCCTCATCCCCACACTAATCATTATTACCCGCTGGGGAAACCAAACAGA  
ACGCTTAAATGCAGGAACCTATTTTCTCTTCTACACATTAGCAGGCTCACTTCCTCTC  
CTCGTTGCTTTACTTCTACTTCAAAATTCATCCGGCACCTTATCTTTATTAACCTCC  
ATTACACAAACCCCCCTCGCTCTCATCTTACGCAGACAAATTATGATGAGCAGGCTGT  
CTTCTAGCATTTCTAGTTAAAATGCCCTCTATGGAGTCCACCTCTGACTTCCTAAGG  
CCCACGTTGAAGCCCCAATTGCAGGCTCAATAATCCTTGCAGCGGTCCTTCTAAAC  
TAGGAGGGTACGGCATAATCCGCATAATGACAATGCTAGAACCTCTAACTAAGGAA  
CTAAGCTACCCATTCAATTGTCTTTGCACTTTGAGGGGTATTATGACCGGCTCAATTT  
GCCTGCGACAAACGGACCTCAAATCCCTAATTGCCTACTCATCTGTAAGCCACATGG  
GTCTAGTGGCCGGGGGCATTCTTATTCAATCACCTGGGGCTTAACGGGGGGCCCTTA  
CCCTTATGATCGCACATGGTCTTACCTCATCAGCCCTCTTCTGCCTGGCAAACACAA  
ACTATGAACGAACCCATAGCCGGACGATAGTCCTAGCACGGGGCCTTCAAGTAGCT  
CTACCCCTGATAGCCACTTGATGGTTTATTTCTAGCCTGGCCAACCTGGCTCTTCCTC  
CCCTACCCAATCTCATGGGTGAACTAATAATTATCACTTCCCTGTTCAACTGATCCTG  
ATGAACCCTGGTATTAACGGGTGGGGGTACTTTAATTACAGCTGGTTATTCCCTCTA  
CATATTCTTAATAACCCAACGAGGGCCCTCTCCCAACACATGTTATTGCACTTGAACC  
CTCTCATACCCGAGAACACCTTCTTATTGCCTTCACCTAGTCCCCCTAATTCTACTCG  
TTCTTAAGCCCGAACTGATCTGAGGTTGGACTGCCTATGACCCCCACACACTTTGCC  
TTCTCCTCAGCCTTTTTTCTAGGTTTAACAGGCCTGGCATTCCACCGGTTCCACCTCC  
TCTCCGCCCTATTATGCCTTGAAGGAATAAATTATCCCTGTTTATTGCTCTCTCCCT  
GTGGACACTCCAGCTTGACTCAACCAACTTCTCAGCATCTCCTATGCTCCTACTTGCA  
TTTTCAGCCTGTGAAGCAAGCGCCGGCCTCGCCCTTCTGGTAGCCACCGCTCGAACC  
CACGGAACCGACCGACTACAAAGCCTAAACCTTCTACAATGCTAAATGTACTCTACC  
TCCCTCATGATTTCTCAAGCCTGATTACGATCTTTGCACTACTGGCTTATCCTCTCA  
TACTACGATTACAGCCTGCACCTCAAAACCTCAATGAGCTTCTACCCATGTCAAAA  
CAGCTGTAAAAATAGCCTTCTTTGTTAGCCTTTTACCCCTCGCCCTCTTTCTCCATGA  
AGGTGCCGAAACAATCATTTCTGACTGAACCTGAATAAACTAACTCCTTCAACAT  
TACTATCAGCCTAAAATTTGACTTCTACTCAATTATTTTCACACCCATTGCCCTTTAC  
GTTACTTGGTCCATTTTAGAATTTCGCATCATGATATATGCATGCAGACCCACAAATG  
AACCGCTTCTTTAAATACCTCCTGACATTTCTGATTGCCATGATTATCCTAGTAACCG  
CAAACAACATATTCCAACCTATTTATCGGTTGGGAAGGTGTGGGAATTATATCATTTT  
TCCTTATCGGGTGGTGGTTCGGACGGGCAGATGCTAACACCGCTGCACTCCAAGCAG  
TGCTCTATAACCGTGTGGGGGATATCGGGCTTATCTTTGCTATGGCTTGAATAGCAG  
CAAACCTAAACTCCTGGGAAATACAACAAGTCTTTGCAGCCTCTAAAAACATAGAC  
TTAACCTACCCCCTCCTCGGACTAATCATCGCAGCAACTGGCAAATCAGCCCAATTT  
GGACTGCACCCCTGGCTGCCCTCCGCTATGGAGGGCCCCACACCGGTCTCTGCCCTA  
CTTCACTCTAGCACCATAGTCGTTGCCGGCATTTTCTGCTAGTACGAATGAGCCCC  
CTTATGGAGAACAACCCAACAGCCCTCACAACTTGCCTATGCCTCGGAGCCCTCACA  
ACATTTTTTACC GCAACCTGTGCCCTCACACAAAATGACATTAAAAAAATCATCGCA  
TTTTCTACATCCAGCCAGCTCGGACTCATAATGGTAACCATTTGGGCTAAACCAACCA  
CAACTAGCATTCCTCCACATTTGCACACACGCCTTCTCAAAGCCATACTATTTTTAT  
GCTCCGGATCTATTATTACAGCCTAAATGACGAACAAGACATTCGAAAAATAGGG  
GGCATACACCACCTTGCGCCTTATTCATCCTCCTGCCTAACTATTGGCAGCCTTGCCC

TCACAGGAACCCCCTTCTTGGCTGGTTTCTTCTCTAAAGATGCCATTATCGAAGCATT  
AAACACATCTCACCTGAACGCCTGAGCCCTCACCTTAACTCTCCTAGCCACCTCTTTC  
ACAGCAATTTACAGCTTTTCGAGTAATATTCTTTGTGCCTATGGGCTACCCCCGATTG  
CTGCCTCTCCCCAATCAACGAAAATAACCCAGCAGTAATCAACCCACTCAAGCGCCT  
AGCATGAGGAAGCATCATTGCAGGCTTACTTATTACCTCTAACATTACACCCCTAAA  
AACCCCTATTATATCTATACCCCTCTCCTTAAACTAGCTGCTCTTGCAGTTACAATT  
GCTGGCCTGCTTGTGGCCATAGAGCTCGCCGCATTAAGTAGTAAACATTACGAACCA  
ATGCCCCGACACAATATTCATCACTTCTCCACCTTACTAGGCTTCTTCCCCGGGGTTAT  
GCATCGCCTAACCCCCATACTAGCCTTCTTCATAGGCCAAAACGTTGCCAACCAAAC  
AGTAGATCAAACCTGATTAGAAAAGACAGGCCCCAAAGCCATCGAATCCTCTAACA  
AACCTCTGATTTCTCTACAAGTAACATCCAACGAGGACTGATCAAAACATACCTCC  
CCTCTTCTTCTAACGCTAGCCCTCATAGTCCCAATATTTATTACCTAATGACTTTTG  
TTATGTATTTAGTTTTATTTTCTCTTGTGTTAGGGTTAGTTGCGGTTGCTTCTAATCCG  
TCTCCTTATTTTGTGCTTTAGGTTTAGTTGTGGTAGCTGGTATGGGGTGTGGTGTGC  
TAGTCGGGCATGGGGGGCCTTTTTTATCATTAGTTTTATTCTTAATTTATTTGGGCGG  
GATGTTGGTTGTATTTGCATATTCAGCAGCGTTAGCTGCCGAGCCGTATCCGGAGAG  
CTGGGGTAGTTGATCGGTGCTGGTTTATGGTTATTTACATAGGAGGAGTAATGTCGT  
TTCAGGGTTGTTTTGAGGGGGGTGGTACGAATCGTCTTGGGTTTTAGCAGACGAGTT  
GGGGGAGTTTTCCGTGTTTCGGGGTGATATTGGGGGTGTTGCTTTAATATACTCCTCT  
GGGGGGTGGTTGTTAATTATTAGTGCGTGGGTGCTACTTTTAACTTTATTTGTAGTTC  
TTGAGCTGACCGCGGGATAAGTCGAGGAGCGTTGCGGCGGTTA"/>

</data>

<map name="Uniform" >beast.math.distributions.Uniform</map>

<map name="Exponential" >beast.math.distributions.Exponential</map>

<map name="LogNormal" >beast.math.distributions.LogNormalDistributionModel</map>

<map name="Normal" >beast.math.distributions.Normal</map>

<map name="Beta" >beast.math.distributions.Beta</map>

<map name="Gamma" >beast.math.distributions.Gamma</map>

<map name="LaplaceDistribution" >beast.math.distributions.LaplaceDistribution</map>

<map name="prior" >beast.math.distributions.Prior</map>

<map name="InverseGamma" >beast.math.distributions.InverseGamma</map>

<map name="OneOnX" >beast.math.distributions.OneOnX</map>

<run id="mcmc" spec="MCMC" chainLength="50000000" numInitializationAttempts="50">

<state id="state" spec="State" storeEvery="5000">

<tree id="Tree.t:nd4\_pos3" spec="beast.evolution.tree.Tree" name="stateNode">

<taxonset id="TaxonSet.nd4\_pos3" spec="TaxonSet">

<alignment id="nd4\_pos3" spec="FilteredAlignment" filter="7380-8754\3">

<data idref="Fl26seq-pt7-11401-123ps4"/>

</alignment>

</taxonset>

</tree>

<parameter id="clockRate.c:nd4\_pos3" spec="parameter.RealParameter"  
name="stateNode">1.0</parameter>

<tree id="Tree.t:atp6\_pos1" spec="beast.evolution.tree.Tree" name="stateNode">

<trait id="dateTrait.t:atp6\_pos1" spec="beast.evolution.tree.TraitSet" traitname="date"  
value="Cleisthenes\_herzensteini\_KT223828=0.0,Hippoglossoides\_platessoides\_MN122825=0.0  
,Hippoglossus\_hippoglossus\_AM749122=0.0,Hippoglossus\_hippoglossus\_AM749123=0.0,Hipp  
oglossus\_hippoglossus\_AM749124=0.0,Hippoglossus\_stenolepis\_AM749126=0.0,Hippoglossus  
\_stenolepis\_AM749127=0.0,Hippoglossus\_stenolepis\_AM749128=0.0,Hippoglossus\_stenolepis  
\_AM749129=0.0,Limanda\_aspera\_KP013094=0.0,Limanda\_limanda\_MN122886=0.0,Paralicht  
hys\_olivaceus\_AB028664=4.619E7,Pleuronichthys\_cornutus\_JQ639071=2.783E7,Pleuronichth  
ys\_japonicus\_KY038655=2.783E7,Pseudopleuronectes\_herzensteini\_MW713061=0.0,Pseudopl  
euronectes\_yokohamae\_KT224485=0.0,Pseudopleuronectes\_yokohamae\_KT878309=0.0,Reinh  
ardtius\_hippoglossoides\_AM749130=0.0,Reinhardtius\_hippoglossoides\_AM749131=0.0,Reinha  
rdtius\_hippoglossoides\_AM749132=0.0,Reinhardtius\_hippoglossoides\_AM749133=0.0,Veraspe  
r\_moseri\_EF025506=0.0,Verasper\_moseri\_LC583747=0.0,Verasper\_variegatus\_DQ403797=0.0  
,Verasper\_variegatus\_MK210571=0.0">

<taxa id="TaxonSet.atp6\_pos1" spec="TaxonSet">

<alignment id="atp6\_pos1" spec="FilteredAlignment" data="@Fl26seq-pt7-11401-  
123ps4" filter="1-678\3"/>

</taxa>

</trait>

<taxonset idref="TaxonSet.atp6\_pos1"/>

</tree>

<tree id="Tree.t:atp8\_pos2" spec="beast.evolution.tree.Tree" name="stateNode">

```

    <taxonset id="TaxonSet.atp8_pos2" spec="TaxonSet">
      <alignment id="atp8_pos2" spec="FilteredAlignment" data="@F126seq-pt7-11401-123ps4" filter="680-844\3"/>
    </taxonset>
  </tree>

  <parameter id="clockRate.c:atp8_pos2" spec="parameter.RealParameter"
name="stateNode">1.0</parameter>

  <tree id="Tree.t:nd4L_pos3" spec="beast.evolution.tree.Tree" name="stateNode">
    <taxonset id="TaxonSet.nd4L_pos3" spec="TaxonSet">
      <alignment id="nd4L_pos3" spec="FilteredAlignment" data="@F126seq-pt7-11401-123ps4" filter="8757-9051\3"/>
    </taxonset>
  </tree>

  <parameter id="clockRate.c:nd4L_pos3" spec="parameter.RealParameter"
name="stateNode">1.0</parameter>

  <tree id="Tree.t:coi_pos3" spec="beast.evolution.tree.Tree" name="stateNode">
    <taxonset id="TaxonSet.coi_pos3" spec="TaxonSet">
      <alignment id="coi_pos3" spec="FilteredAlignment" data="@F126seq-pt7-11401-123ps4" filter="847-2395\3"/>
    </taxonset>
  </tree>

  <parameter id="clockRate.c:coi_pos3" spec="parameter.RealParameter"
name="stateNode">1.0</parameter>

  <tree id="Tree.t:nd2_pos3" spec="beast.evolution.tree.Tree" name="stateNode">
    <taxonset id="TaxonSet.nd2_pos3" spec="TaxonSet">
      <alignment id="nd2_pos3" spec="FilteredAlignment" data="@F126seq-pt7-11401-123ps4" filter="5989-7028\3"/>
    </taxonset>
  </tree>

  <parameter id="clockRate.c:nd2_pos3" spec="parameter.RealParameter"
name="stateNode">1.0</parameter>

  <tree id="Tree.t:coiii_pos2" spec="beast.evolution.tree.Tree" name="stateNode">
    <taxonset id="TaxonSet.coiii_pos2" spec="TaxonSet">
      <alignment id="coiii_pos2" spec="FilteredAlignment" data="@F126seq-pt7-11401-123ps4" filter="3088-3871\3"/>
    </taxonset>
  </tree>

```

```

    </taxonset>

</tree>

<parameter id="clockRate.c:coiii_pos2" spec="parameter.RealParameter"
name="stateNode">1.0</parameter>

<tree id="Tree.t:nd6_pos3" spec="beast.evolution.tree.Tree" name="stateNode">

    <taxonset id="TaxonSet.nd6_pos3" spec="TaxonSet">

        <alignment id="nd6_pos3" spec="FilteredAlignment" data="@Fl26seq-pt7-11401-
123ps4" filter="10889-11401\3"/>

    </taxonset>

</tree>

<parameter id="clockRate.c:nd6_pos3" spec="parameter.RealParameter"
name="stateNode">1.0</parameter>

<tree id="Tree.t:nd1_pos3" spec="beast.evolution.tree.Tree" name="stateNode">

    <taxonset id="TaxonSet.nd1_pos3" spec="TaxonSet">

        <alignment id="nd1_pos3" spec="FilteredAlignment" data="@Fl26seq-pt7-11401-
123ps4" filter="5014-5986\3"/>

    </taxonset>

</tree>

<parameter id="clockRate.c:nd1_pos3" spec="parameter.RealParameter"
name="stateNode">1.0</parameter>

<tree id="Tree.t:coii_pos3" spec="beast.evolution.tree.Tree" name="stateNode">

    <taxonset id="TaxonSet.coii_pos3" spec="TaxonSet">

        <alignment id="coii_pos3" spec="FilteredAlignment" data="@Fl26seq-pt7-11401-
123ps4" filter="2398-3086\3"/>

    </taxonset>

</tree>

<parameter id="clockRate.c:coii_pos3" spec="parameter.RealParameter"
name="stateNode">1.0</parameter>

<tree id="Tree.t:nd2_pos2" spec="beast.evolution.tree.Tree" name="stateNode">

    <taxonset id="TaxonSet.nd2_pos2" spec="TaxonSet">

        <alignment id="nd2_pos2" spec="FilteredAlignment" data="@Fl26seq-pt7-11401-
123ps4" filter="5988-7028\3"/>

    </taxonset>

</tree>

```

```

    <parameter id="clockRate.c:nd2_pos2" spec="parameter.RealParameter"
name="stateNode">1.0</parameter>

    <tree id="Tree.t:nd4L_pos1" spec="beast.evolution.tree.Tree" name="stateNode">

        <taxonset id="TaxonSet.nd4L_pos1" spec="TaxonSet">

            <alignment id="nd4L_pos1" spec="FilteredAlignment" data="@F126seq-pt7-11401-
123ps4" filter="8755-9051\3"/>

        </taxonset>

    </tree>

    <parameter id="clockRate.c:nd4L_pos1" spec="parameter.RealParameter"
name="stateNode">1.0</parameter>

    <tree id="Tree.t:coi_pos2" spec="beast.evolution.tree.Tree" name="stateNode">

        <taxonset id="TaxonSet.coi_pos2" spec="TaxonSet">

            <alignment id="coi_pos2" spec="FilteredAlignment" data="@F126seq-pt7-11401-
123ps4" filter="846-2395\3"/>

        </taxonset>

    </tree>

    <parameter id="clockRate.c:coi_pos2" spec="parameter.RealParameter"
name="stateNode">1.0</parameter>

    <tree id="Tree.t:coii_pos2" spec="beast.evolution.tree.Tree" name="stateNode">

        <taxonset id="TaxonSet.coii_pos2" spec="TaxonSet">

            <alignment id="coii_pos2" spec="FilteredAlignment" data="@F126seq-pt7-11401-
123ps4" filter="2397-3086\3"/>

        </taxonset>

    </tree>

    <parameter id="clockRate.c:coii_pos2" spec="parameter.RealParameter"
name="stateNode">1.0</parameter>

    <tree id="Tree.t:coii_pos1" spec="beast.evolution.tree.Tree" name="stateNode">

        <taxonset id="TaxonSet.coii_pos1" spec="TaxonSet">

            <alignment id="coii_pos1" spec="FilteredAlignment" data="@F126seq-pt7-11401-
123ps4" filter="2396-3086\3"/>

        </taxonset>

    </tree>

    <parameter id="clockRate.c:coii_pos1" spec="parameter.RealParameter"
name="stateNode">1.0</parameter>

    <tree id="Tree.t:nd1_pos1" spec="beast.evolution.tree.Tree" name="stateNode">

```

```

    <taxonset id="TaxonSet.nd1_pos1" spec="TaxonSet">
        <alignment id="nd1_pos1" spec="FilteredAlignment" data="@F126seq-pt7-11401-123ps4" filter="5012-5986\3"/>
    </taxonset>
</tree>

<parameter id="clockRate.c:nd1_pos1" spec="parameter.RealParameter"
name="stateNode">1.0</parameter>

<tree id="Tree.t:nd4_pos1" spec="beast.evolution.tree.Tree" name="stateNode">

    <taxonset id="TaxonSet.nd4_pos1" spec="TaxonSet">
        <alignment id="nd4_pos1" spec="FilteredAlignment" data="@F126seq-pt7-11401-123ps4" filter="7378-8754\3"/>
    </taxonset>

</tree>

<parameter id="clockRate.c:nd4_pos1" spec="parameter.RealParameter"
name="stateNode">1.0</parameter>

<tree id="Tree.t:nd5_pos1" spec="beast.evolution.tree.Tree" name="stateNode">

    <taxonset id="TaxonSet.nd5_pos1" spec="TaxonSet">
        <alignment id="nd5_pos1" spec="FilteredAlignment" data="@F126seq-pt7-11401-123ps4" filter="9052-10886\3"/>
    </taxonset>

</tree>

<parameter id="clockRate.c:nd5_pos1" spec="parameter.RealParameter"
name="stateNode">1.0</parameter>

<tree id="Tree.t:atp6_pos2" spec="beast.evolution.tree.Tree" name="stateNode">

    <taxonset id="TaxonSet.atp6_pos2" spec="TaxonSet">
        <alignment id="atp6_pos2" spec="FilteredAlignment" data="@F126seq-pt7-11401-123ps4" filter="2-678\3"/>
    </taxonset>

</tree>

<parameter id="clockRate.c:atp6_pos2" spec="parameter.RealParameter"
name="stateNode">1.0</parameter>

<tree id="Tree.t:nd5_pos3" spec="beast.evolution.tree.Tree" name="stateNode">

    <taxonset id="TaxonSet.nd5_pos3" spec="TaxonSet">
        <alignment id="nd5_pos3" spec="FilteredAlignment" data="@F126seq-pt7-11401-123ps4" filter="9054-10886\3"/>
    </taxonset>

```



```

    </taxonset>

</tree>

<parameter id="clockRate.c:nd5_pos3" spec="parameter.RealParameter"
name="stateNode">1.0</parameter>

<tree id="Tree.t:atp6_pos3" spec="beast.evolution.tree.Tree" name="stateNode">

    <taxonset id="TaxonSet.atp6_pos3" spec="TaxonSet">

        <alignment id="atp6_pos3" spec="FilteredAlignment" data="@Fl26seq-pt7-11401-
123ps4" filter="3-678\3"/>

    </taxonset>

</tree>

<parameter id="clockRate.c:atp6_pos3" spec="parameter.RealParameter"
name="stateNode">1.0</parameter>

<tree id="Tree.t:nd3_pos1" spec="beast.evolution.tree.Tree" name="stateNode">

    <taxonset id="TaxonSet.nd3_pos1" spec="TaxonSet">

        <alignment id="nd3_pos1" spec="FilteredAlignment" data="@Fl26seq-pt7-11401-
123ps4" filter="7029-7377\3"/>

    </taxonset>

</tree>

<parameter id="clockRate.c:nd3_pos1" spec="parameter.RealParameter"
name="stateNode">1.0</parameter>

<tree id="Tree.t:nd6_pos2" spec="beast.evolution.tree.Tree" name="stateNode">

    <taxonset id="TaxonSet.nd6_pos2" spec="TaxonSet">

        <alignment id="nd6_pos2" spec="FilteredAlignment" data="@Fl26seq-pt7-11401-
123ps4" filter="10888-11401\3"/>

    </taxonset>

</tree>

<parameter id="clockRate.c:nd6_pos2" spec="parameter.RealParameter"
name="stateNode">1.0</parameter>

<tree id="Tree.t:coiii_pos1" spec="beast.evolution.tree.Tree" name="stateNode">

    <taxonset id="TaxonSet.coiii_pos1" spec="TaxonSet">

        <alignment id="coiii_pos1" spec="FilteredAlignment" data="@Fl26seq-pt7-11401-
123ps4" filter="3087-3871\3"/>

    </taxonset>

</tree>

```

```

    <parameter id="clockRate.c:coiii_pos1" spec="parameter.RealParameter"
name="stateNode">1.0</parameter>

    <tree id="Tree.t:atp8_pos1" spec="beast.evolution.tree.Tree" name="stateNode">

        <taxonset id="TaxonSet.atp8_pos1" spec="TaxonSet">

            <alignment id="atp8_pos1" spec="FilteredAlignment" data="@Fl26seq-pt7-11401-
123ps4" filter="679-844\3"/>

        </taxonset>

    </tree>

    <parameter id="clockRate.c:atp8_pos1" spec="parameter.RealParameter"
name="stateNode">1.0</parameter>

    <tree id="Tree.t:nd5_pos2" spec="beast.evolution.tree.Tree" name="stateNode">

        <taxonset id="TaxonSet.nd5_pos2" spec="TaxonSet">

            <alignment id="nd5_pos2" spec="FilteredAlignment" data="@Fl26seq-pt7-11401-
123ps4" filter="9053-10886\3"/>

        </taxonset>

    </tree>

    <parameter id="clockRate.c:nd5_pos2" spec="parameter.RealParameter"
name="stateNode">1.0</parameter>

    <tree id="Tree.t:nd3_pos3" spec="beast.evolution.tree.Tree" name="stateNode">

        <taxonset id="TaxonSet.nd3_pos3" spec="TaxonSet">

            <alignment id="nd3_pos3" spec="FilteredAlignment" data="@Fl26seq-pt7-11401-
123ps4" filter="7031-7377\3"/>

        </taxonset>

    </tree>

    <parameter id="clockRate.c:nd3_pos3" spec="parameter.RealParameter"
name="stateNode">1.0</parameter>

    <tree id="Tree.t:cytb_pos3" spec="beast.evolution.tree.Tree" name="stateNode">

        <taxonset id="TaxonSet.cytb_pos3" spec="TaxonSet">

            <alignment id="cytb_pos3" spec="FilteredAlignment" data="@Fl26seq-pt7-11401-
123ps4" filter="3874-5011\3"/>

        </taxonset>

    </tree>

    <parameter id="clockRate.c:cytb_pos3" spec="parameter.RealParameter"
name="stateNode">1.0</parameter>

    <tree id="Tree.t:cytb_pos1" spec="beast.evolution.tree.Tree" name="stateNode">

```

```

    <taxonset id="TaxonSet.cytb_pos1" spec="TaxonSet">
        <alignment id="cytb_pos1" spec="FilteredAlignment" data="@Fl26seq-pt7-11401-123ps4" filter="3872-5011\3"/>
    </taxonset>

</tree>

<parameter id="clockRate.c:cytb_pos1" spec="parameter.RealParameter"
name="stateNode">1.0</parameter>

<tree id="Tree.t:cytb_pos2" spec="beast.evolution.tree.Tree" name="stateNode">
    <taxonset id="TaxonSet.cytb_pos2" spec="TaxonSet">
        <alignment id="cytb_pos2" spec="FilteredAlignment" data="@Fl26seq-pt7-11401-123ps4" filter="3873-5011\3"/>
    </taxonset>

</tree>

<parameter id="clockRate.c:cytb_pos2" spec="parameter.RealParameter"
name="stateNode">1.0</parameter>

<tree id="Tree.t:nd3_pos2" spec="beast.evolution.tree.Tree" name="stateNode">
    <taxonset id="TaxonSet.nd3_pos2" spec="TaxonSet">
        <alignment id="nd3_pos2" spec="FilteredAlignment" data="@Fl26seq-pt7-11401-123ps4" filter="7030-7377\3"/>
    </taxonset>

</tree>

<parameter id="clockRate.c:nd3_pos2" spec="parameter.RealParameter"
name="stateNode">1.0</parameter>

<tree id="Tree.t:coi_pos1" spec="beast.evolution.tree.Tree" name="stateNode">
    <taxonset id="TaxonSet.coi_pos1" spec="TaxonSet">
        <alignment id="coi_pos1" spec="FilteredAlignment" data="@Fl26seq-pt7-11401-123ps4" filter="845-2395\3"/>
    </taxonset>

</tree>

<parameter id="clockRate.c:coi_pos1" spec="parameter.RealParameter"
name="stateNode">1.0</parameter>

<tree id="Tree.t:coiii_pos3" spec="beast.evolution.tree.Tree" name="stateNode">
    <taxonset id="TaxonSet.coiii_pos3" spec="TaxonSet">
        <alignment id="coiii_pos3" spec="FilteredAlignment" data="@Fl26seq-pt7-11401-123ps4" filter="3089-3871\3"/>
    </taxonset>

```

```

    </taxonset>

</tree>

<parameter id="clockRate.c:coiii_pos3" spec="parameter.RealParameter"
name="stateNode">1.0</parameter>

<tree id="Tree.t:nd1_pos2" spec="beast.evolution.tree.Tree" name="stateNode">

    <taxonset id="TaxonSet.nd1_pos2" spec="TaxonSet">

        <alignment id="nd1_pos2" spec="FilteredAlignment" data="@F126seq-pt7-11401-
123ps4" filter="5013-5986\3"/>

    </taxonset>

</tree>

<parameter id="clockRate.c:nd1_pos2" spec="parameter.RealParameter"
name="stateNode">1.0</parameter>

<tree id="Tree.t:nd4L_pos2" spec="beast.evolution.tree.Tree" name="stateNode">

    <taxonset id="TaxonSet.nd4L_pos2" spec="TaxonSet">

        <alignment id="nd4L_pos2" spec="FilteredAlignment" data="@F126seq-pt7-11401-
123ps4" filter="8756-9051\3"/>

    </taxonset>

</tree>

<parameter id="clockRate.c:nd4L_pos2" spec="parameter.RealParameter"
name="stateNode">1.0</parameter>

<tree id="Tree.t:atp8_pos3" spec="beast.evolution.tree.Tree" name="stateNode">

    <taxonset id="TaxonSet.atp8_pos3" spec="TaxonSet">

        <alignment id="atp8_pos3" spec="FilteredAlignment" data="@F126seq-pt7-11401-
123ps4" filter="681-844\3"/>

    </taxonset>

</tree>

<parameter id="clockRate.c:atp8_pos3" spec="parameter.RealParameter"
name="stateNode">1.0</parameter>

<tree id="Tree.t:nd4_pos2" spec="beast.evolution.tree.Tree" name="stateNode">

    <taxonset id="TaxonSet.nd4_pos2" spec="TaxonSet">

        <alignment id="nd4_pos2" spec="FilteredAlignment" data="@F126seq-pt7-11401-
123ps4" filter="7379-8754\3"/>

    </taxonset>

</tree>

```

```

    <parameter id="clockRate.c:nd4_pos2" spec="parameter.RealParameter"
name="stateNode">1.0</parameter>

    <tree id="Tree.t:nd6_pos1" spec="beast.evolution.tree.Tree" name="stateNode">

        <taxonset id="TaxonSet.nd6_pos1" spec="TaxonSet">

            <alignment id="nd6_pos1" spec="FilteredAlignment" data="@Fl26seq-pt7-11401-
123ps4" filter="10887-11301\3"/>

        </taxonset>

    </tree>

    <parameter id="clockRate.c:nd6_pos1" spec="parameter.RealParameter"
name="stateNode">1.0</parameter>

    <tree id="Tree.t:nd2_pos1" spec="beast.evolution.tree.Tree" name="stateNode">

        <taxonset id="TaxonSet.nd2_pos1" spec="TaxonSet">

            <alignment id="nd2_pos1" spec="FilteredAlignment" data="@Fl26seq-pt7-11401-
123ps4" filter="5987-7028\3"/>

        </taxonset>

    </tree>

    <parameter id="clockRate.c:nd2_pos1" spec="parameter.RealParameter"
name="stateNode">1.0</parameter>

    <tree id="Tree.t:Fl26seq-pt8-11401-123ps4" spec="beast.evolution.tree.Tree"
name="stateNode">

        <trait id="dateTrait.t:Fl26seq-pt8-11401-123ps4" spec="beast.evolution.tree.TraitSet"
traitname="date" value="">

            <taxa id="TaxonSet.Fl26seq-pt8-11401-123ps4" spec="TaxonSet">

                <alignment idref="Fl26seq-pt8-11401-123ps4"/>

            </taxa>

        </trait>

        <taxonset idref="TaxonSet.Fl26seq-pt8-11401-123ps4"/>

    </tree>

    <parameter id="clockRate.c:Fl26seq-pt8-11401-123ps4" spec="parameter.RealParameter"
name="stateNode">1.0</parameter>

    <parameter id="parameter.hyperLogNormalDistributionModel-M-Fl26sq-Par-oliv+Pleuro"
spec="parameter.RealParameter" name="stateNode">1.0</parameter>

    <parameter id="parameter.hyperLogNormalDistributionModel-S-Fl26sq-Par-oliv+Pleuro"
spec="parameter.RealParameter" lower="0.0" name="stateNode"
upper="5.0">1.25</parameter>

```

<parameter id="parameter.hyperGamma-alpha-HyperPrior.hyperLogNormalDistributionModel-M-FI26sq-Par-oliv+Pleuro" spec="parameter.RealParameter" name="stateNode">2.0</parameter>

<parameter id="parameter.hyperGamma-beta-HyperPrior.hyperLogNormalDistributionModel-M-FI26sq-Par-oliv+Pleuro" spec="parameter.RealParameter" name="stateNode">2.0</parameter>

<parameter id="parameter.hyperGamma-alpha-HyperPrior.hyperGamma-alpha-HyperPrior.hyperLogNormalDistributionModel-M-FI26sq-Par-oliv+Pleuro" spec="parameter.RealParameter" name="stateNode">2.0</parameter>

<parameter id="parameter.hyperGamma-beta-HyperPrior.hyperGamma-alpha-HyperPrior.hyperLogNormalDistributionModel-M-FI26sq-Par-oliv+Pleuro" spec="parameter.RealParameter" name="stateNode">2.0</parameter>

<parameter id="parameter.hyperGamma-alpha-HyperPrior.hyperGamma-alpha-HyperPrior.hyperGamma-alpha-HyperPrior.hyperLogNormalDistributionModel-M-FI26sq-Par-oliv+Pleuro" spec="parameter.RealParameter" name="stateNode">2.0</parameter>

<parameter id="parameter.hyperGamma-beta-HyperPrior.hyperGamma-alpha-HyperPrior.hyperGamma-alpha-HyperPrior.hyperLogNormalDistributionModel-M-FI26sq-Par-oliv+Pleuro" spec="parameter.RealParameter" name="stateNode">2.0</parameter>

<parameter id="parameter.hyperGamma-alpha-FI26sq-Par-oliv+Pleuro" spec="parameter.RealParameter" name="stateNode">2.0</parameter>

<parameter id="parameter.hyperGamma-beta-FI26sq-Par-oliv+Pleuro" spec="parameter.RealParameter" name="stateNode">2.0</parameter>

<parameter id="parameter.hyperGamma-alpha-FI26sq-Par-oliv+Pleuro1" spec="parameter.RealParameter" name="stateNode">2.0</parameter>

<parameter id="parameter.hyperGamma-beta-FI26sq-Par-oliv+Pleuro1" spec="parameter.RealParameter" name="stateNode">2.0</parameter>

<parameter id="parameter.hyperGamma-alpha-CalibratedYuleBirthRatePrior.t:nd5\_pos2" spec="parameter.RealParameter" name="stateNode">2.0</parameter>

<parameter id="parameter.hyperGamma-beta-CalibratedYuleBirthRatePrior.t:nd5\_pos2" spec="parameter.RealParameter" name="stateNode">2.0</parameter>

<parameter id="parameter.hyperGamma-alpha-UCMeanRatePrior.c:atp6\_pos1" spec="parameter.RealParameter" name="stateNode">2.0</parameter>

<parameter id="parameter.hyperGamma-beta-UCMeanRatePrior.c:atp6\_pos1" spec="parameter.RealParameter" name="stateNode">2.0</parameter>

<parameter id="ucedMean.c:atp6\_pos1" spec="parameter.RealParameter" name="stateNode">2.0</parameter>

<stateNode id="expRateCategories.c:atp6\_pos1" spec="parameter.IntegerParameter" dimension="50">1</stateNode>

<parameter id="parameter.hyperLogNormalDistributionModel-M-FI26sq-Par-oliv+Pleuro1.prior" spec="parameter.RealParameter" name="stateNode">17.65</parameter>

<parameter id="parameter.hyperLogNormalDistributionModel-S-Fl26sq-Par-oliv+Pleuro1.prior" spec="parameter.RealParameter" lower="0.0" name="stateNode" upper="5.0">0.36</parameter>

<parameter id="parameter.hyperGamma-alpha-ClockPrior.c:Fl26seq-pt8-11401-123ps4" spec="parameter.RealParameter" name="stateNode">7.85</parameter>

<parameter id="parameter.hyperGamma-beta-ClockPrior.c:Fl26seq-pt8-11401-123ps4" spec="parameter.RealParameter" name="stateNode">1.7</parameter>

<parameter id="popSize.t:Fl26seq-pt8-11401-123ps4" spec="parameter.RealParameter" name="stateNode">0.3</parameter>

<parameter id="popSize.t:atp6\_pos1" spec="parameter.RealParameter" name="stateNode">0.3</parameter>

<parameter id="popSize.t:atp6\_pos2" spec="parameter.RealParameter" name="stateNode">0.3</parameter>

<parameter id="popSize.t:atp6\_pos3" spec="parameter.RealParameter" name="stateNode">0.3</parameter>

<parameter id="popSize.t:atp8\_pos1" spec="parameter.RealParameter" name="stateNode">0.3</parameter>

<parameter id="popSize.t:atp8\_pos2" spec="parameter.RealParameter" name="stateNode">0.3</parameter>

<parameter id="popSize.t:atp8\_pos3" spec="parameter.RealParameter" name="stateNode">0.3</parameter>

<parameter id="popSize.t:coi\_pos1" spec="parameter.RealParameter" name="stateNode">0.3</parameter>

<parameter id="popSize.t:coi\_pos2" spec="parameter.RealParameter" name="stateNode">0.3</parameter>

<parameter id="popSize.t:coi\_pos3" spec="parameter.RealParameter" name="stateNode">0.3</parameter>

<parameter id="popSize.t:coii\_pos1" spec="parameter.RealParameter" name="stateNode">0.3</parameter>

<parameter id="popSize.t:coii\_pos2" spec="parameter.RealParameter" name="stateNode">0.3</parameter>

<parameter id="popSize.t:coii\_pos3" spec="parameter.RealParameter" name="stateNode">0.3</parameter>

<parameter id="popSize.t:coiii\_pos1" spec="parameter.RealParameter" name="stateNode">0.3</parameter>

<parameter id="popSize.t:coiii\_pos2" spec="parameter.RealParameter" name="stateNode">0.3</parameter>

<parameter id="popSize.t:coiii\_pos3" spec="parameter.RealParameter" name="stateNode">0.3</parameter>

<parameter id="popSize.t:cytb\_pos1" spec="parameter.RealParameter"  
name="stateNode">0.3</parameter>

<parameter id="popSize.t:cytb\_pos2" spec="parameter.RealParameter"  
name="stateNode">0.3</parameter>

<parameter id="popSize.t:cytb\_pos3" spec="parameter.RealParameter"  
name="stateNode">0.3</parameter>

<parameter id="popSize.t:nd1\_pos1" spec="parameter.RealParameter"  
name="stateNode">0.3</parameter>

<parameter id="popSize.t:nd1\_pos2" spec="parameter.RealParameter"  
name="stateNode">0.3</parameter>

<parameter id="popSize.t:nd1\_pos3" spec="parameter.RealParameter"  
name="stateNode">0.3</parameter>

<parameter id="popSize.t:nd2\_pos1" spec="parameter.RealParameter"  
name="stateNode">0.3</parameter>

<parameter id="popSize.t:nd2\_pos2" spec="parameter.RealParameter"  
name="stateNode">0.3</parameter>

<parameter id="popSize.t:nd2\_pos3" spec="parameter.RealParameter"  
name="stateNode">0.3</parameter>

<parameter id="popSize.t:nd3\_pos1" spec="parameter.RealParameter"  
name="stateNode">0.3</parameter>

<parameter id="popSize.t:nd3\_pos2" spec="parameter.RealParameter"  
name="stateNode">0.3</parameter>

<parameter id="popSize.t:nd3\_pos3" spec="parameter.RealParameter"  
name="stateNode">0.3</parameter>

<parameter id="popSize.t:nd4L\_pos1" spec="parameter.RealParameter"  
name="stateNode">0.3</parameter>

<parameter id="popSize.t:nd4L\_pos2" spec="parameter.RealParameter"  
name="stateNode">0.3</parameter>

<parameter id="popSize.t:nd4L\_pos3" spec="parameter.RealParameter"  
name="stateNode">0.3</parameter>

<parameter id="popSize.t:nd4\_pos1" spec="parameter.RealParameter"  
name="stateNode">0.3</parameter>

<parameter id="popSize.t:nd4\_pos2" spec="parameter.RealParameter"  
name="stateNode">0.3</parameter>

<parameter id="popSize.t:nd4\_pos3" spec="parameter.RealParameter"  
name="stateNode">0.3</parameter>

<parameter id="popSize.t:nd5\_pos1" spec="parameter.RealParameter"  
name="stateNode">0.3</parameter>



<parameter id="popSize.t:nd5\_pos2" spec="parameter.RealParameter"  
name="stateNode">0.3</parameter>

<parameter id="popSize.t:nd5\_pos3" spec="parameter.RealParameter"  
name="stateNode">0.3</parameter>

<parameter id="popSize.t:nd6\_pos1" spec="parameter.RealParameter"  
name="stateNode">0.3</parameter>

<parameter id="popSize.t:nd6\_pos2" spec="parameter.RealParameter"  
name="stateNode">0.3</parameter>

<parameter id="popSize.t:nd6\_pos3" spec="parameter.RealParameter"  
name="stateNode">0.3</parameter>

</state>

<init id="RandomTree.t:nd4\_pos3" spec="beast.evolution.tree.RandomTree" estimate="false"  
initial="@Tree.t:nd4\_pos3" taxa="@nd4\_pos3">

<populationModel id="ConstantPopulation0.t:nd4\_pos3" spec="ConstantPopulation">

<parameter id="randomPopSize.t:nd4\_pos3" spec="parameter.RealParameter"  
name="popSize">1.0</parameter>

</populationModel>

</init>

<init id="RandomTree.t:atp6\_pos1" spec="beast.evolution.tree.RandomTree"  
estimate="false" initial="@Tree.t:atp6\_pos1" taxa="@atp6\_pos1">

<populationModel id="ConstantPopulation0.t:atp6\_pos1" spec="ConstantPopulation">

<parameter id="randomPopSize.t:atp6\_pos1" spec="parameter.RealParameter"  
name="popSize">1.0</parameter>

</populationModel>

</init>

<init id="RandomTree.t:atp8\_pos2" spec="beast.evolution.tree.RandomTree"  
estimate="false" initial="@Tree.t:atp8\_pos2" taxa="@atp8\_pos2">

<populationModel id="ConstantPopulation0.t:atp8\_pos2" spec="ConstantPopulation">

<parameter id="randomPopSize.t:atp8\_pos2" spec="parameter.RealParameter"  
name="popSize">1.0</parameter>

</populationModel>

</init>

```

<init id="RandomTree.t:nd4L_pos3" spec="beast.evolution.tree.RandomTree"
estimate="false" initial="@Tree.t:nd4L_pos3" taxa="@nd4L_pos3">

  <populationModel id="ConstantPopulation0.t:nd4L_pos3" spec="ConstantPopulation">

    <parameter id="randomPopSize.t:nd4L_pos3" spec="parameter.RealParameter"
name="popSize">1.0</parameter>

  </populationModel>

</init>

<init id="RandomTree.t:coi_pos3" spec="beast.evolution.tree.RandomTree" estimate="false"
initial="@Tree.t:coi_pos3" taxa="@coi_pos3">

  <populationModel id="ConstantPopulation0.t:coi_pos3" spec="ConstantPopulation">

    <parameter id="randomPopSize.t:coi_pos3" spec="parameter.RealParameter"
name="popSize">1.0</parameter>

  </populationModel>

</init>

<init id="RandomTree.t:nd2_pos3" spec="beast.evolution.tree.RandomTree" estimate="false"
initial="@Tree.t:nd2_pos3" taxa="@nd2_pos3">

  <populationModel id="ConstantPopulation0.t:nd2_pos3" spec="ConstantPopulation">

    <parameter id="randomPopSize.t:nd2_pos3" spec="parameter.RealParameter"
name="popSize">1.0</parameter>

  </populationModel>

</init>

<init id="RandomTree.t:coiii_pos2" spec="beast.evolution.tree.RandomTree"
estimate="false" initial="@Tree.t:coiii_pos2" taxa="@coiii_pos2">

  <populationModel id="ConstantPopulation0.t:coiii_pos2" spec="ConstantPopulation">

    <parameter id="randomPopSize.t:coiii_pos2" spec="parameter.RealParameter"
name="popSize">1.0</parameter>

  </populationModel>

</init>

<init id="RandomTree.t:nd6_pos3" spec="beast.evolution.tree.RandomTree" estimate="false"
initial="@Tree.t:nd6_pos3" taxa="@nd6_pos3">

  <populationModel id="ConstantPopulation0.t:nd6_pos3" spec="ConstantPopulation">

```

```
    <parameter id="randomPopSize.t:nd6_pos3" spec="parameter.RealParameter"
name="popSize">1.0</parameter>
```

```
  </populationModel>
```

```
</init>
```

```
<init id="RandomTree.t:nd1_pos3" spec="beast.evolution.tree.RandomTree" estimate="false"
initial="@Tree.t:nd1_pos3" taxa="@nd1_pos3">
```

```
  <populationModel id="ConstantPopulation0.t:nd1_pos3" spec="ConstantPopulation">
```

```
    <parameter id="randomPopSize.t:nd1_pos3" spec="parameter.RealParameter"
name="popSize">1.0</parameter>
```

```
  </populationModel>
```

```
</init>
```

```
<init id="RandomTree.t:coii_pos3" spec="beast.evolution.tree.RandomTree" estimate="false"
initial="@Tree.t:coii_pos3" taxa="@coii_pos3">
```

```
  <populationModel id="ConstantPopulation0.t:coii_pos3" spec="ConstantPopulation">
```

```
    <parameter id="randomPopSize.t:coii_pos3" spec="parameter.RealParameter"
name="popSize">1.0</parameter>
```

```
  </populationModel>
```

```
</init>
```

```
<init id="RandomTree.t:nd2_pos2" spec="beast.evolution.tree.RandomTree" estimate="false"
initial="@Tree.t:nd2_pos2" taxa="@nd2_pos2">
```

```
  <populationModel id="ConstantPopulation0.t:nd2_pos2" spec="ConstantPopulation">
```

```
    <parameter id="randomPopSize.t:nd2_pos2" spec="parameter.RealParameter"
name="popSize">1.0</parameter>
```

```
  </populationModel>
```

```
</init>
```

```
<init id="RandomTree.t:nd4L_pos1" spec="beast.evolution.tree.RandomTree"
estimate="false" initial="@Tree.t:nd4L_pos1" taxa="@nd4L_pos1">
```

```
  <populationModel id="ConstantPopulation0.t:nd4L_pos1" spec="ConstantPopulation">
```

```
    <parameter id="randomPopSize.t:nd4L_pos1" spec="parameter.RealParameter"
name="popSize">1.0</parameter>
```

```
  </populationModel>
```

</init>

<init id="RandomTree.t:coi\_pos2" spec="beast.evolution.tree.RandomTree" estimate="false"  
initial="@Tree.t:coi\_pos2" taxa="@coi\_pos2">

<populationModel id="ConstantPopulation0.t:coi\_pos2" spec="ConstantPopulation">

<parameter id="randomPopSize.t:coi\_pos2" spec="parameter.RealParameter"  
name="popSize">1.0</parameter>

</populationModel>

</init>

<init id="RandomTree.t:coii\_pos2" spec="beast.evolution.tree.RandomTree" estimate="false"  
initial="@Tree.t:coii\_pos2" taxa="@coii\_pos2">

<populationModel id="ConstantPopulation0.t:coii\_pos2" spec="ConstantPopulation">

<parameter id="randomPopSize.t:coii\_pos2" spec="parameter.RealParameter"  
name="popSize">1.0</parameter>

</populationModel>

</init>

<init id="RandomTree.t:coii\_pos1" spec="beast.evolution.tree.RandomTree" estimate="false"  
initial="@Tree.t:coii\_pos1" taxa="@coii\_pos1">

<populationModel id="ConstantPopulation0.t:coii\_pos1" spec="ConstantPopulation">

<parameter id="randomPopSize.t:coii\_pos1" spec="parameter.RealParameter"  
name="popSize">1.0</parameter>

</populationModel>

</init>

<init id="RandomTree.t:nd1\_pos1" spec="beast.evolution.tree.RandomTree" estimate="false"  
initial="@Tree.t:nd1\_pos1" taxa="@nd1\_pos1">

<populationModel id="ConstantPopulation0.t:nd1\_pos1" spec="ConstantPopulation">

<parameter id="randomPopSize.t:nd1\_pos1" spec="parameter.RealParameter"  
name="popSize">1.0</parameter>

</populationModel>

</init>

```
<init id="RandomTree.t:nd4_pos1" spec="beast.evolution.tree.RandomTree" estimate="false"
initial="@Tree.t:nd4_pos1" taxa="@nd4_pos1">
```

```
<populationModel id="ConstantPopulation0.t:nd4_pos1" spec="ConstantPopulation">
```

```
<parameter id="randomPopSize.t:nd4_pos1" spec="parameter.RealParameter"
name="popSize">1.0</parameter>
```

```
</populationModel>
```

```
</init>
```

```
<init id="RandomTree.t:nd5_pos1" spec="beast.evolution.tree.RandomTree" estimate="false"
initial="@Tree.t:nd5_pos1" taxa="@nd5_pos1">
```

```
<populationModel id="ConstantPopulation0.t:nd5_pos1" spec="ConstantPopulation">
```

```
<parameter id="randomPopSize.t:nd5_pos1" spec="parameter.RealParameter"
name="popSize">1.0</parameter>
```

```
</populationModel>
```

```
</init>
```

```
<init id="RandomTree.t:atp6_pos2" spec="beast.evolution.tree.RandomTree"
estimate="false" initial="@Tree.t:atp6_pos2" taxa="@atp6_pos2">
```

```
<populationModel id="ConstantPopulation0.t:atp6_pos2" spec="ConstantPopulation">
```

```
<parameter id="randomPopSize.t:atp6_pos2" spec="parameter.RealParameter"
name="popSize">1.0</parameter>
```

```
</populationModel>
```

```
</init>
```

```
<init id="RandomTree.t:nd5_pos3" spec="beast.evolution.tree.RandomTree" estimate="false"
initial="@Tree.t:nd5_pos3" taxa="@nd5_pos3">
```

```
<populationModel id="ConstantPopulation0.t:nd5_pos3" spec="ConstantPopulation">
```

```
<parameter id="randomPopSize.t:nd5_pos3" spec="parameter.RealParameter"
name="popSize">1.0</parameter>
```

```
</populationModel>
```

```
</init>
```

```
<init id="RandomTree.t:atp6_pos3" spec="beast.evolution.tree.RandomTree"
estimate="false" initial="@Tree.t:atp6_pos3" taxa="@atp6_pos3">
```

```
<populationModel id="ConstantPopulation0.t:atp6_pos3" spec="ConstantPopulation">
```

```
    <parameter id="randomPopSize.t:atp6_pos3" spec="parameter.RealParameter"
name="popSize">1.0</parameter>
```

```
  </populationModel>
```

```
</init>
```

```
<init id="RandomTree.t:nd3_pos1" spec="beast.evolution.tree.RandomTree" estimate="false"
initial="@Tree.t:nd3_pos1" taxa="@nd3_pos1">
```

```
  <populationModel id="ConstantPopulation0.t:nd3_pos1" spec="ConstantPopulation">
```

```
    <parameter id="randomPopSize.t:nd3_pos1" spec="parameter.RealParameter"
name="popSize">1.0</parameter>
```

```
  </populationModel>
```

```
</init>
```

```
<init id="RandomTree.t:nd6_pos2" spec="beast.evolution.tree.RandomTree" estimate="false"
initial="@Tree.t:nd6_pos2" taxa="@nd6_pos2">
```

```
  <populationModel id="ConstantPopulation0.t:nd6_pos2" spec="ConstantPopulation">
```

```
    <parameter id="randomPopSize.t:nd6_pos2" spec="parameter.RealParameter"
name="popSize">1.0</parameter>
```

```
  </populationModel>
```

```
</init>
```

```
<init id="RandomTree.t:coiii_pos1" spec="beast.evolution.tree.RandomTree"
estimate="false" initial="@Tree.t:coiii_pos1" taxa="@coiii_pos1">
```

```
  <populationModel id="ConstantPopulation0.t:coiii_pos1" spec="ConstantPopulation">
```

```
    <parameter id="randomPopSize.t:coiii_pos1" spec="parameter.RealParameter"
name="popSize">1.0</parameter>
```

```
  </populationModel>
```

```
</init>
```

```
<init id="RandomTree.t:atp8_pos1" spec="beast.evolution.tree.RandomTree"
estimate="false" initial="@Tree.t:atp8_pos1" taxa="@atp8_pos1">
```

```
  <populationModel id="ConstantPopulation0.t:atp8_pos1" spec="ConstantPopulation">
```

```
    <parameter id="randomPopSize.t:atp8_pos1" spec="parameter.RealParameter"
name="popSize">1.0</parameter>
```

```
  </populationModel>
```

</init>

<init id="RandomTree.t:nd5\_pos2" spec="beast.evolution.tree.RandomTree" estimate="false"  
initial="@Tree.t:nd5\_pos2" taxa="@nd5\_pos2">

<populationModel id="ConstantPopulation0.t:nd5\_pos2" spec="ConstantPopulation">

<parameter id="randomPopSize.t:nd5\_pos2" spec="parameter.RealParameter"  
name="popSize">1.0</parameter>

</populationModel>

</init>

<init id="RandomTree.t:nd3\_pos3" spec="beast.evolution.tree.RandomTree" estimate="false"  
initial="@Tree.t:nd3\_pos3" taxa="@nd3\_pos3">

<populationModel id="ConstantPopulation0.t:nd3\_pos3" spec="ConstantPopulation">

<parameter id="randomPopSize.t:nd3\_pos3" spec="parameter.RealParameter"  
name="popSize">1.0</parameter>

</populationModel>

</init>

<init id="RandomTree.t:cytb\_pos3" spec="beast.evolution.tree.RandomTree"  
estimate="false" initial="@Tree.t:cytb\_pos3" taxa="@cytb\_pos3">

<populationModel id="ConstantPopulation0.t:cytb\_pos3" spec="ConstantPopulation">

<parameter id="randomPopSize.t:cytb\_pos3" spec="parameter.RealParameter"  
name="popSize">1.0</parameter>

</populationModel>

</init>

<init id="RandomTree.t:cytb\_pos1" spec="beast.evolution.tree.RandomTree"  
estimate="false" initial="@Tree.t:cytb\_pos1" taxa="@cytb\_pos1">

<populationModel id="ConstantPopulation0.t:cytb\_pos1" spec="ConstantPopulation">

<parameter id="randomPopSize.t:cytb\_pos1" spec="parameter.RealParameter"  
name="popSize">1.0</parameter>

</populationModel>

</init>

```

<init id="RandomTree.t:cytb_pos2" spec="beast.evolution.tree.RandomTree"
estimate="false" initial="@Tree.t:cytb_pos2" taxa="@cytb_pos2">

  <populationModel id="ConstantPopulation0.t:cytb_pos2" spec="ConstantPopulation">

    <parameter id="randomPopSize.t:cytb_pos2" spec="parameter.RealParameter"
name="popSize">1.0</parameter>

  </populationModel>

</init>

<init id="RandomTree.t:nd3_pos2" spec="beast.evolution.tree.RandomTree" estimate="false"
initial="@Tree.t:nd3_pos2" taxa="@nd3_pos2">

  <populationModel id="ConstantPopulation0.t:nd3_pos2" spec="ConstantPopulation">

    <parameter id="randomPopSize.t:nd3_pos2" spec="parameter.RealParameter"
name="popSize">1.0</parameter>

  </populationModel>

</init>

<init id="RandomTree.t:coi_pos1" spec="beast.evolution.tree.RandomTree" estimate="false"
initial="@Tree.t:coi_pos1" taxa="@coi_pos1">

  <populationModel id="ConstantPopulation0.t:coi_pos1" spec="ConstantPopulation">

    <parameter id="randomPopSize.t:coi_pos1" spec="parameter.RealParameter"
name="popSize">1.0</parameter>

  </populationModel>

</init>

<init id="RandomTree.t:coiii_pos3" spec="beast.evolution.tree.RandomTree"
estimate="false" initial="@Tree.t:coiii_pos3" taxa="@coiii_pos3">

  <populationModel id="ConstantPopulation0.t:coiii_pos3" spec="ConstantPopulation">

    <parameter id="randomPopSize.t:coiii_pos3" spec="parameter.RealParameter"
name="popSize">1.0</parameter>

  </populationModel>

</init>

<init id="RandomTree.t:nd1_pos2" spec="beast.evolution.tree.RandomTree" estimate="false"
initial="@Tree.t:nd1_pos2" taxa="@nd1_pos2">

  <populationModel id="ConstantPopulation0.t:nd1_pos2" spec="ConstantPopulation">

```



```
    <parameter id="randomPopSize.t:nd1_pos2" spec="parameter.RealParameter"
name="popSize">1.0</parameter>
```

```
  </populationModel>
```

```
</init>
```

```
<init id="RandomTree.t:nd4L_pos2" spec="beast.evolution.tree.RandomTree"
estimate="false" initial="@Tree.t:nd4L_pos2" taxa="@nd4L_pos2">
```

```
  <populationModel id="ConstantPopulation0.t:nd4L_pos2" spec="ConstantPopulation">
```

```
    <parameter id="randomPopSize.t:nd4L_pos2" spec="parameter.RealParameter"
name="popSize">1.0</parameter>
```

```
  </populationModel>
```

```
</init>
```

```
<init id="RandomTree.t:atp8_pos3" spec="beast.evolution.tree.RandomTree"
estimate="false" initial="@Tree.t:atp8_pos3" taxa="@atp8_pos3">
```

```
  <populationModel id="ConstantPopulation0.t:atp8_pos3" spec="ConstantPopulation">
```

```
    <parameter id="randomPopSize.t:atp8_pos3" spec="parameter.RealParameter"
name="popSize">1.0</parameter>
```

```
  </populationModel>
```

```
</init>
```

```
<init id="RandomTree.t:nd4_pos2" spec="beast.evolution.tree.RandomTree" estimate="false"
initial="@Tree.t:nd4_pos2" taxa="@nd4_pos2">
```

```
  <populationModel id="ConstantPopulation0.t:nd4_pos2" spec="ConstantPopulation">
```

```
    <parameter id="randomPopSize.t:nd4_pos2" spec="parameter.RealParameter"
name="popSize">1.0</parameter>
```

```
  </populationModel>
```

```
</init>
```

```
<init id="RandomTree.t:nd6_pos1" spec="beast.evolution.tree.RandomTree" estimate="false"
initial="@Tree.t:nd6_pos1" taxa="@nd6_pos1">
```

```
  <populationModel id="ConstantPopulation0.t:nd6_pos1" spec="ConstantPopulation">
```

```
    <parameter id="randomPopSize.t:nd6_pos1" spec="parameter.RealParameter"
name="popSize">1.0</parameter>
```

```
  </populationModel>
```

</init>

<init id="RandomTree.t:nd2\_pos1" spec="beast.evolution.tree.RandomTree" estimate="false"  
initial="@Tree.t:nd2\_pos1" taxa="@nd2\_pos1">

<populationModel id="ConstantPopulation0.t:nd2\_pos1" spec="ConstantPopulation">

<parameter id="randomPopSize.t:nd2\_pos1" spec="parameter.RealParameter"  
name="popSize">1.0</parameter>

</populationModel>

</init>

<init id="RandomTree.t:Fl26seq-pt8-11401-123ps4" spec="beast.evolution.tree.RandomTree"  
estimate="false" initial="@Tree.t:Fl26seq-pt8-11401-123ps4" taxa="@Fl26seq-pt8-11401-  
123ps4">

<populationModel id="ConstantPopulation0.t:Fl26seq-pt8-11401-123ps4"  
spec="ConstantPopulation">

<parameter id="randomPopSize.t:Fl26seq-pt8-11401-123ps4"  
spec="parameter.RealParameter" name="popSize">1.0</parameter>

</populationModel>

</init>

<distribution id="posterior" spec="util.CompoundDistribution">

<distribution id="prior" spec="util.CompoundDistribution">

<distribution id="CoalescentConstant.t:Fl26seq-pt8-11401-123ps4" spec="Coalescent">

<populationModel id="ConstantPopulation.t:Fl26seq-pt8-11401-123ps4"  
spec="ConstantPopulation" popSize="@popSize.t:Fl26seq-pt8-11401-123ps4"/>

<treeIntervals id="TreeIntervals.t:Fl26seq-pt8-11401-123ps4" spec="TreeIntervals"  
tree="@Tree.t:Fl26seq-pt8-11401-123ps4"/>

</distribution>

<distribution id="CoalescentConstant.t:atp6\_pos1" spec="Coalescent">

<populationModel id="ConstantPopulation.t:atp6\_pos1" spec="ConstantPopulation"  
popSize="@popSize.t:atp6\_pos1"/>

<treeIntervals id="TreeIntervals.t:atp6\_pos1" spec="TreeIntervals"  
tree="@Tree.t:atp6\_pos1"/>

</distribution>

<distribution id="CoalescentConstant.t:atp6\_pos2" spec="Coalescent">

```

        <populationModel id="ConstantPopulation.t:atp6_pos2" spec="ConstantPopulation"
popSize="@popSize.t:atp6_pos2"/>

        <treeIntervals id="TreeIntervals.t:atp6_pos2" spec="TreeIntervals"
tree="@Tree.t:atp6_pos2"/>

    </distribution>

    <distribution id="CoalescentConstant.t:atp6_pos3" spec="Coalescent">

        <populationModel id="ConstantPopulation.t:atp6_pos3" spec="ConstantPopulation"
popSize="@popSize.t:atp6_pos3"/>

        <treeIntervals id="TreeIntervals.t:atp6_pos3" spec="TreeIntervals"
tree="@Tree.t:atp6_pos3"/>

    </distribution>

    <distribution id="CoalescentConstant.t:atp8_pos1" spec="Coalescent">

        <populationModel id="ConstantPopulation.t:atp8_pos1" spec="ConstantPopulation"
popSize="@popSize.t:atp8_pos1"/>

        <treeIntervals id="TreeIntervals.t:atp8_pos1" spec="TreeIntervals"
tree="@Tree.t:atp8_pos1"/>

    </distribution>

    <distribution id="CoalescentConstant.t:atp8_pos2" spec="Coalescent">

        <populationModel id="ConstantPopulation.t:atp8_pos2" spec="ConstantPopulation"
popSize="@popSize.t:atp8_pos2"/>

        <treeIntervals id="TreeIntervals.t:atp8_pos2" spec="TreeIntervals"
tree="@Tree.t:atp8_pos2"/>

    </distribution>

    <distribution id="CoalescentConstant.t:atp8_pos3" spec="Coalescent">

        <populationModel id="ConstantPopulation.t:atp8_pos3" spec="ConstantPopulation"
popSize="@popSize.t:atp8_pos3"/>

        <treeIntervals id="TreeIntervals.t:atp8_pos3" spec="TreeIntervals"
tree="@Tree.t:atp8_pos3"/>

    </distribution>

    <distribution id="CoalescentConstant.t:coi_pos1" spec="Coalescent">

        <populationModel id="ConstantPopulation.t:coi_pos1" spec="ConstantPopulation"
popSize="@popSize.t:coi_pos1"/>

        <treeIntervals id="TreeIntervals.t:coi_pos1" spec="TreeIntervals"
tree="@Tree.t:coi_pos1"/>

    </distribution>

    <distribution id="CoalescentConstant.t:coi_pos2" spec="Coalescent">

```

```

        <populationModel id="ConstantPopulation.t:coi_pos2" spec="ConstantPopulation"
popSize="@popSize.t:coi_pos2"/>

        <treeIntervals id="TreeIntervals.t:coi_pos2" spec="TreeIntervals"
tree="@Tree.t:coi_pos2"/>

    </distribution>

    <distribution id="CoalescentConstant.t:coi_pos3" spec="Coalescent">

        <populationModel id="ConstantPopulation.t:coi_pos3" spec="ConstantPopulation"
popSize="@popSize.t:coi_pos3"/>

        <treeIntervals id="TreeIntervals.t:coi_pos3" spec="TreeIntervals"
tree="@Tree.t:coi_pos3"/>

    </distribution>

    <distribution id="CoalescentConstant.t:coii_pos1" spec="Coalescent">

        <populationModel id="ConstantPopulation.t:coii_pos1" spec="ConstantPopulation"
popSize="@popSize.t:coii_pos1"/>

        <treeIntervals id="TreeIntervals.t:coii_pos1" spec="TreeIntervals"
tree="@Tree.t:coii_pos1"/>

    </distribution>

    <distribution id="CoalescentConstant.t:coii_pos2" spec="Coalescent">

        <populationModel id="ConstantPopulation.t:coii_pos2" spec="ConstantPopulation"
popSize="@popSize.t:coii_pos2"/>

        <treeIntervals id="TreeIntervals.t:coii_pos2" spec="TreeIntervals"
tree="@Tree.t:coii_pos2"/>

    </distribution>

    <distribution id="CoalescentConstant.t:coii_pos3" spec="Coalescent">

        <populationModel id="ConstantPopulation.t:coii_pos3" spec="ConstantPopulation"
popSize="@popSize.t:coii_pos3"/>

        <treeIntervals id="TreeIntervals.t:coii_pos3" spec="TreeIntervals"
tree="@Tree.t:coii_pos3"/>

    </distribution>

    <distribution id="CoalescentConstant.t:coiii_pos1" spec="Coalescent">

        <populationModel id="ConstantPopulation.t:coiii_pos1" spec="ConstantPopulation"
popSize="@popSize.t:coiii_pos1"/>

        <treeIntervals id="TreeIntervals.t:coiii_pos1" spec="TreeIntervals"
tree="@Tree.t:coiii_pos1"/>

    </distribution>

    <distribution id="CoalescentConstant.t:coiii_pos2" spec="Coalescent">

```

```

        <populationModel id="ConstantPopulation.t:coiii_pos2" spec="ConstantPopulation"
popSize="@popSize.t:coiii_pos2"/>

        <treeIntervals id="TreeIntervals.t:coiii_pos2" spec="TreeIntervals"
tree="@Tree.t:coiii_pos2"/>

    </distribution>

    <distribution id="CoalescentConstant.t:coiii_pos3" spec="Coalescent">

        <populationModel id="ConstantPopulation.t:coiii_pos3" spec="ConstantPopulation"
popSize="@popSize.t:coiii_pos3"/>

        <treeIntervals id="TreeIntervals.t:coiii_pos3" spec="TreeIntervals"
tree="@Tree.t:coiii_pos3"/>

    </distribution>

    <distribution id="CoalescentConstant.t:cytb_pos1" spec="Coalescent">

        <populationModel id="ConstantPopulation.t:cytb_pos1" spec="ConstantPopulation"
popSize="@popSize.t:cytb_pos1"/>

        <treeIntervals id="TreeIntervals.t:cytb_pos1" spec="TreeIntervals"
tree="@Tree.t:cytb_pos1"/>

    </distribution>

    <distribution id="CoalescentConstant.t:cytb_pos2" spec="Coalescent">

        <populationModel id="ConstantPopulation.t:cytb_pos2" spec="ConstantPopulation"
popSize="@popSize.t:cytb_pos2"/>

        <treeIntervals id="TreeIntervals.t:cytb_pos2" spec="TreeIntervals"
tree="@Tree.t:cytb_pos2"/>

    </distribution>

    <distribution id="CoalescentConstant.t:cytb_pos3" spec="Coalescent">

        <populationModel id="ConstantPopulation.t:cytb_pos3" spec="ConstantPopulation"
popSize="@popSize.t:cytb_pos3"/>

        <treeIntervals id="TreeIntervals.t:cytb_pos3" spec="TreeIntervals"
tree="@Tree.t:cytb_pos3"/>

    </distribution>

    <distribution id="CoalescentConstant.t:nd1_pos1" spec="Coalescent">

        <populationModel id="ConstantPopulation.t:nd1_pos1" spec="ConstantPopulation"
popSize="@popSize.t:nd1_pos1"/>

        <treeIntervals id="TreeIntervals.t:nd1_pos1" spec="TreeIntervals"
tree="@Tree.t:nd1_pos1"/>

    </distribution>

    <distribution id="CoalescentConstant.t:nd1_pos2" spec="Coalescent">

```

```

    <populationModel id="ConstantPopulation.t:nd1_pos2" spec="ConstantPopulation"
popSize="@popSize.t:nd1_pos2"/>

    <treeIntervals id="TreeIntervals.t:nd1_pos2" spec="TreeIntervals"
tree="@Tree.t:nd1_pos2"/>

</distribution>

<distribution id="CoalescentConstant.t:nd1_pos3" spec="Coalescent">

    <populationModel id="ConstantPopulation.t:nd1_pos3" spec="ConstantPopulation"
popSize="@popSize.t:nd1_pos3"/>

    <treeIntervals id="TreeIntervals.t:nd1_pos3" spec="TreeIntervals"
tree="@Tree.t:nd1_pos3"/>

</distribution>

<distribution id="CoalescentConstant.t:nd2_pos1" spec="Coalescent">

    <populationModel id="ConstantPopulation.t:nd2_pos1" spec="ConstantPopulation"
popSize="@popSize.t:nd2_pos1"/>

    <treeIntervals id="TreeIntervals.t:nd2_pos1" spec="TreeIntervals"
tree="@Tree.t:nd2_pos1"/>

</distribution>

<distribution id="CoalescentConstant.t:nd2_pos2" spec="Coalescent">

    <populationModel id="ConstantPopulation.t:nd2_pos2" spec="ConstantPopulation"
popSize="@popSize.t:nd2_pos2"/>

    <treeIntervals id="TreeIntervals.t:nd2_pos2" spec="TreeIntervals"
tree="@Tree.t:nd2_pos2"/>

</distribution>

<distribution id="CoalescentConstant.t:nd2_pos3" spec="Coalescent">

    <populationModel id="ConstantPopulation.t:nd2_pos3" spec="ConstantPopulation"
popSize="@popSize.t:nd2_pos3"/>

    <treeIntervals id="TreeIntervals.t:nd2_pos3" spec="TreeIntervals"
tree="@Tree.t:nd2_pos3"/>

</distribution>

<distribution id="CoalescentConstant.t:nd3_pos1" spec="Coalescent">

    <populationModel id="ConstantPopulation.t:nd3_pos1" spec="ConstantPopulation"
popSize="@popSize.t:nd3_pos1"/>

    <treeIntervals id="TreeIntervals.t:nd3_pos1" spec="TreeIntervals"
tree="@Tree.t:nd3_pos1"/>

</distribution>

<distribution id="CoalescentConstant.t:nd3_pos2" spec="Coalescent">

```

```

        <populationModel id="ConstantPopulation.t:nd3_pos2" spec="ConstantPopulation"
popSize="@popSize.t:nd3_pos2"/>

        <treeIntervals id="TreeIntervals.t:nd3_pos2" spec="TreeIntervals"
tree="@Tree.t:nd3_pos2"/>

    </distribution>

    <distribution id="CoalescentConstant.t:nd3_pos3" spec="Coalescent">

        <populationModel id="ConstantPopulation.t:nd3_pos3" spec="ConstantPopulation"
popSize="@popSize.t:nd3_pos3"/>

        <treeIntervals id="TreeIntervals.t:nd3_pos3" spec="TreeIntervals"
tree="@Tree.t:nd3_pos3"/>

    </distribution>

    <distribution id="CoalescentConstant.t:nd4L_pos1" spec="Coalescent">

        <populationModel id="ConstantPopulation.t:nd4L_pos1" spec="ConstantPopulation"
popSize="@popSize.t:nd4L_pos1"/>

        <treeIntervals id="TreeIntervals.t:nd4L_pos1" spec="TreeIntervals"
tree="@Tree.t:nd4L_pos1"/>

    </distribution>

    <distribution id="CoalescentConstant.t:nd4L_pos2" spec="Coalescent">

        <populationModel id="ConstantPopulation.t:nd4L_pos2" spec="ConstantPopulation"
popSize="@popSize.t:nd4L_pos2"/>

        <treeIntervals id="TreeIntervals.t:nd4L_pos2" spec="TreeIntervals"
tree="@Tree.t:nd4L_pos2"/>

    </distribution>

    <distribution id="CoalescentConstant.t:nd4L_pos3" spec="Coalescent">

        <populationModel id="ConstantPopulation.t:nd4L_pos3" spec="ConstantPopulation"
popSize="@popSize.t:nd4L_pos3"/>

        <treeIntervals id="TreeIntervals.t:nd4L_pos3" spec="TreeIntervals"
tree="@Tree.t:nd4L_pos3"/>

    </distribution>

    <distribution id="CoalescentConstant.t:nd4_pos1" spec="Coalescent">

        <populationModel id="ConstantPopulation.t:nd4_pos1" spec="ConstantPopulation"
popSize="@popSize.t:nd4_pos1"/>

        <treeIntervals id="TreeIntervals.t:nd4_pos1" spec="TreeIntervals"
tree="@Tree.t:nd4_pos1"/>

    </distribution>

    <distribution id="CoalescentConstant.t:nd4_pos2" spec="Coalescent">

```

```

        <populationModel id="ConstantPopulation.t:nd4_pos2" spec="ConstantPopulation"
popSize="@popSize.t:nd4_pos2"/>

        <treeIntervals id="TreeIntervals.t:nd4_pos2" spec="TreeIntervals"
tree="@Tree.t:nd4_pos2"/>

    </distribution>

    <distribution id="CoalescentConstant.t:nd4_pos3" spec="Coalescent">

        <populationModel id="ConstantPopulation.t:nd4_pos3" spec="ConstantPopulation"
popSize="@popSize.t:nd4_pos3"/>

        <treeIntervals id="TreeIntervals.t:nd4_pos3" spec="TreeIntervals"
tree="@Tree.t:nd4_pos3"/>

    </distribution>

    <distribution id="CoalescentConstant.t:nd5_pos1" spec="Coalescent">

        <populationModel id="ConstantPopulation.t:nd5_pos1" spec="ConstantPopulation"
popSize="@popSize.t:nd5_pos1"/>

        <treeIntervals id="TreeIntervals.t:nd5_pos1" spec="TreeIntervals"
tree="@Tree.t:nd5_pos1"/>

    </distribution>

    <distribution id="CoalescentConstant.t:nd5_pos2" spec="Coalescent">

        <populationModel id="ConstantPopulation.t:nd5_pos2" spec="ConstantPopulation"
popSize="@popSize.t:nd5_pos2"/>

        <treeIntervals id="TreeIntervals.t:nd5_pos2" spec="TreeIntervals"
tree="@Tree.t:nd5_pos2"/>

    </distribution>

    <distribution id="CoalescentConstant.t:nd5_pos3" spec="Coalescent">

        <populationModel id="ConstantPopulation.t:nd5_pos3" spec="ConstantPopulation"
popSize="@popSize.t:nd5_pos3"/>

        <treeIntervals id="TreeIntervals.t:nd5_pos3" spec="TreeIntervals"
tree="@Tree.t:nd5_pos3"/>

    </distribution>

    <distribution id="CoalescentConstant.t:nd6_pos1" spec="Coalescent">

        <populationModel id="ConstantPopulation.t:nd6_pos1" spec="ConstantPopulation"
popSize="@popSize.t:nd6_pos1"/>

        <treeIntervals id="TreeIntervals.t:nd6_pos1" spec="TreeIntervals"
tree="@Tree.t:nd6_pos1"/>

    </distribution>

    <distribution id="CoalescentConstant.t:nd6_pos2" spec="Coalescent">

```



```

    <populationModel id="ConstantPopulation.t:nd6_pos2" spec="ConstantPopulation"
popSize="@popSize.t:nd6_pos2"/>

    <treeIntervals id="TreeIntervals.t:nd6_pos2" spec="TreeIntervals"
tree="@Tree.t:nd6_pos2"/>

</distribution>

<distribution id="CoalescentConstant.t:nd6_pos3" spec="Coalescent">

    <populationModel id="ConstantPopulation.t:nd6_pos3" spec="ConstantPopulation"
popSize="@popSize.t:nd6_pos3"/>

    <treeIntervals id="TreeIntervals.t:nd6_pos3" spec="TreeIntervals"
tree="@Tree.t:nd6_pos3"/>

</distribution>

    <prior id="ClockPrior.c:Fl26seq-pt8-11401-123ps4" name="distribution"
x="@clockRate.c:Fl26seq-pt8-11401-123ps4">

        <Normal id="Normal.40" name="distr">

            <parameter id="RealParameter.1677" spec="parameter.RealParameter"
estimate="false" name="mean">2.0</parameter>

            <parameter id="RealParameter.1678" spec="parameter.RealParameter"
estimate="false" name="sigma">1.0</parameter>

        </Normal>

    </prior>

    <prior id="ClockPrior.c:atp6_pos2" name="distribution" x="@clockRate.c:atp6_pos2">

        <Normal id="Normal.41" name="distr">

            <parameter id="RealParameter.1686" spec="parameter.RealParameter"
estimate="false" name="mean">2.0</parameter>

            <parameter id="RealParameter.1687" spec="parameter.RealParameter"
estimate="false" name="sigma">1.0</parameter>

        </Normal>

    </prior>

    <prior id="ClockPrior.c:atp6_pos3" name="distribution" x="@clockRate.c:atp6_pos3">

        <Normal id="Normal.42" name="distr">

            <parameter id="RealParameter.1688" spec="parameter.RealParameter"
estimate="false" name="mean">2.0</parameter>

            <parameter id="RealParameter.1689" spec="parameter.RealParameter"
estimate="false" name="sigma">1.0</parameter>

        </Normal>

    </prior>

```

```

<prior id="ClockPrior.c:atp8_pos1" name="distribution" x="@clockRate.c:atp8_pos1">
  <Normal id="Normal.43" name="distr">
    <parameter id="RealParameter.1693" spec="parameter.RealParameter"
estimate="false" name="mean">2.0</parameter>
    <parameter id="RealParameter.1694" spec="parameter.RealParameter"
estimate="false" name="sigma">1.0</parameter>
  </Normal>
</prior>

<prior id="ClockPrior.c:atp8_pos2" name="distribution" x="@clockRate.c:atp8_pos2">
  <Normal id="Normal.44" name="distr">
    <parameter id="RealParameter.1696" spec="parameter.RealParameter"
estimate="false" name="mean">2.0</parameter>
    <parameter id="RealParameter.1697" spec="parameter.RealParameter"
estimate="false" name="sigma">1.0</parameter>
  </Normal>
</prior>

<prior id="ClockPrior.c:atp8_pos3" name="distribution" x="@clockRate.c:atp8_pos3">
  <Normal id="Normal.45" name="distr">
    <parameter id="RealParameter.1707" spec="parameter.RealParameter"
estimate="false" name="mean">2.0</parameter>
    <parameter id="RealParameter.1716" spec="parameter.RealParameter"
estimate="false" name="sigma">1.0</parameter>
  </Normal>
</prior>

<prior id="ClockPrior.c:coi_pos1" name="distribution" x="@clockRate.c:coi_pos1">
  <Normal id="Normal.46" name="distr">
    <parameter id="RealParameter.1717" spec="parameter.RealParameter"
estimate="false" name="mean">2.0</parameter>
    <parameter id="RealParameter.1718" spec="parameter.RealParameter"
estimate="false" name="sigma">1.0</parameter>
  </Normal>
</prior>

<prior id="ClockPrior.c:coi_pos2" name="distribution" x="@clockRate.c:coi_pos2">
  <Normal id="Normal.47" name="distr">

```

```

        <parameter id="RealParameter.1719" spec="parameter.RealParameter"
estimate="false" name="mean">2.0</parameter>

        <parameter id="RealParameter.1720" spec="parameter.RealParameter"
estimate="false" name="sigma">1.0</parameter>

    </Normal>

</prior>

<prior id="ClockPrior.c:coi_pos3" name="distribution" x="@clockRate.c:coi_pos3">

    <Normal id="Normal.48" name="distr">

        <parameter id="RealParameter.1721" spec="parameter.RealParameter"
estimate="false" name="mean">2.0</parameter>

        <parameter id="RealParameter.1722" spec="parameter.RealParameter"
estimate="false" name="sigma">1.0</parameter>

    </Normal>

</prior>

<prior id="ClockPrior.c:coii_pos1" name="distribution" x="@clockRate.c:coii_pos1">

    <Normal id="Normal.49" name="distr">

        <parameter id="RealParameter.1723" spec="parameter.RealParameter"
estimate="false" name="mean">2.0</parameter>

        <parameter id="RealParameter.1724" spec="parameter.RealParameter"
estimate="false" name="sigma">1.0</parameter>

    </Normal>

</prior>

<prior id="ClockPrior.c:coii_pos2" name="distribution" x="@clockRate.c:coii_pos2">

    <Normal id="Normal.50" name="distr">

        <parameter id="RealParameter.1725" spec="parameter.RealParameter"
estimate="false" name="mean">2.0</parameter>

        <parameter id="RealParameter.1726" spec="parameter.RealParameter"
estimate="false" name="sigma">1.0</parameter>

    </Normal>

</prior>

<prior id="ClockPrior.c:coii_pos3" name="distribution" x="@clockRate.c:coii_pos3">

    <Normal id="Normal.51" name="distr">

        <parameter id="RealParameter.1727" spec="parameter.RealParameter"
estimate="false" name="mean">2.0</parameter>

```

```

        <parameter id="RealParameter.1728" spec="parameter.RealParameter"
estimate="false" name="sigma">1.0</parameter>

    </Normal>

</prior>

<prior id="ClockPrior.c:coiii_pos1" name="distribution" x="@clockRate.c:coiii_pos1">

    <Normal id="Normal.52" name="distr">

        <parameter id="RealParameter.1729" spec="parameter.RealParameter"
estimate="false" name="mean">2.0</parameter>

        <parameter id="RealParameter.1730" spec="parameter.RealParameter"
estimate="false" name="sigma">1.0</parameter>

    </Normal>

</prior>

<prior id="ClockPrior.c:coiii_pos2" name="distribution" x="@clockRate.c:coiii_pos2">

    <Normal id="Normal.53" name="distr">

        <parameter id="RealParameter.1731" spec="parameter.RealParameter"
estimate="false" name="mean">2.0</parameter>

        <parameter id="RealParameter.1732" spec="parameter.RealParameter"
estimate="false" name="sigma">1.0</parameter>

    </Normal>

</prior>

<prior id="ClockPrior.c:coiii_pos3" name="distribution" x="@clockRate.c:coiii_pos3">

    <Normal id="Normal.54" name="distr">

        <parameter id="RealParameter.1733" spec="parameter.RealParameter"
estimate="false" name="mean">2.0</parameter>

        <parameter id="RealParameter.1734" spec="parameter.RealParameter"
estimate="false" name="sigma">1.0</parameter>

    </Normal>

</prior>

<prior id="ClockPrior.c:cytb_pos1" name="distribution" x="@clockRate.c:cytb_pos1">

    <Normal id="Normal.55" name="distr">

        <parameter id="RealParameter.1735" spec="parameter.RealParameter"
estimate="false" name="mean">2.0</parameter>

        <parameter id="RealParameter.1736" spec="parameter.RealParameter"
estimate="false" name="sigma">1.0</parameter>

    </Normal>

```

```

</prior>

<prior id="ClockPrior.c:cytb_pos2" name="distribution" x="@clockRate.c:cytb_pos2">
  <Normal id="Normal.56" name="distr">
    <parameter id="RealParameter.1737" spec="parameter.RealParameter"
estimate="false" name="mean">2.0</parameter>
    <parameter id="RealParameter.1738" spec="parameter.RealParameter"
estimate="false" name="sigma">1.0</parameter>
  </Normal>
</prior>

<prior id="ClockPrior.c:cytb_pos3" name="distribution" x="@clockRate.c:cytb_pos3">
  <Normal id="Normal.57" name="distr">
    <parameter id="RealParameter.1739" spec="parameter.RealParameter"
estimate="false" name="mean">2.0</parameter>
    <parameter id="RealParameter.1740" spec="parameter.RealParameter"
estimate="false" name="sigma">1.0</parameter>
  </Normal>
</prior>

<prior id="ClockPrior.c:nd1_pos1" name="distribution" x="@clockRate.c:nd1_pos1">
  <Normal id="Normal.58" name="distr">
    <parameter id="RealParameter.1741" spec="parameter.RealParameter"
estimate="false" name="mean">2.0</parameter>
    <parameter id="RealParameter.1742" spec="parameter.RealParameter"
estimate="false" name="sigma">1.0</parameter>
  </Normal>
</prior>

<prior id="ClockPrior.c:nd1_pos2" name="distribution" x="@clockRate.c:nd1_pos2">
  <Normal id="Normal.59" name="distr">
    <parameter id="RealParameter.1743" spec="parameter.RealParameter"
estimate="false" name="mean">2.0</parameter>
    <parameter id="RealParameter.1744" spec="parameter.RealParameter"
estimate="false" name="sigma">1.0</parameter>
  </Normal>
</prior>

<prior id="ClockPrior.c:nd1_pos3" name="distribution" x="@clockRate.c:nd1_pos3">
  <Normal id="Normal.60" name="distr">

```

```

        <parameter id="RealParameter.1745" spec="parameter.RealParameter"
estimate="false" name="mean">2.0</parameter>

        <parameter id="RealParameter.1746" spec="parameter.RealParameter"
estimate="false" name="sigma">1.0</parameter>

    </Normal>

</prior>

<prior id="ClockPrior.c:nd2_pos1" name="distribution" x="@clockRate.c:nd2_pos1">

    <Normal id="Normal.61" name="distr">

        <parameter id="RealParameter.1747" spec="parameter.RealParameter"
estimate="false" name="mean">2.0</parameter>

        <parameter id="RealParameter.1748" spec="parameter.RealParameter"
estimate="false" name="sigma">1.0</parameter>

    </Normal>

</prior>

<prior id="ClockPrior.c:nd2_pos2" name="distribution" x="@clockRate.c:nd2_pos2">

    <Normal id="Normal.62" name="distr">

        <parameter id="RealParameter.1749" spec="parameter.RealParameter"
estimate="false" name="mean">2.0</parameter>

        <parameter id="RealParameter.1750" spec="parameter.RealParameter"
estimate="false" name="sigma">1.0</parameter>

    </Normal>

</prior>

<prior id="ClockPrior.c:nd2_pos3" name="distribution" x="@clockRate.c:nd2_pos3">

    <Normal id="Normal.63" name="distr">

        <parameter id="RealParameter.1751" spec="parameter.RealParameter"
estimate="false" name="mean">2.0</parameter>

        <parameter id="RealParameter.1752" spec="parameter.RealParameter"
estimate="false" name="sigma">1.0</parameter>

    </Normal>

</prior>

<prior id="ClockPrior.c:nd3_pos1" name="distribution" x="@clockRate.c:nd3_pos1">

    <Normal id="Normal.64" name="distr">

        <parameter id="RealParameter.1755" spec="parameter.RealParameter"
estimate="false" name="mean">2.0</parameter>

```

```

        <parameter id="RealParameter.1756" spec="parameter.RealParameter"
estimate="false" name="sigma">1.0</parameter>

    </Normal>

</prior>

<prior id="ClockPrior.c:nd3_pos2" name="distribution" x="@clockRate.c:nd3_pos2">

    <Normal id="Normal.65" name="distr">

        <parameter id="RealParameter.1757" spec="parameter.RealParameter"
estimate="false" name="mean">2.0</parameter>

        <parameter id="RealParameter.1758" spec="parameter.RealParameter"
estimate="false" name="sigma">1.0</parameter>

    </Normal>

</prior>

<prior id="ClockPrior.c:nd3_pos3" name="distribution" x="@clockRate.c:nd3_pos3">

    <Normal id="Normal.66" name="distr">

        <parameter id="RealParameter.1759" spec="parameter.RealParameter"
estimate="false" name="mean">2.0</parameter>

        <parameter id="RealParameter.1760" spec="parameter.RealParameter"
estimate="false" name="sigma">1.0</parameter>

    </Normal>

</prior>

<prior id="ClockPrior.c:nd4L_pos1" name="distribution"
x="@clockRate.c:nd4L_pos1">

    <Normal id="Normal.67" name="distr">

        <parameter id="RealParameter.1761" spec="parameter.RealParameter"
estimate="false" name="mean">2.0</parameter>

        <parameter id="RealParameter.1762" spec="parameter.RealParameter"
estimate="false" name="sigma">1.0</parameter>

    </Normal>

</prior>

<prior id="ClockPrior.c:nd4L_pos2" name="distribution"
x="@clockRate.c:nd4L_pos2">

    <Normal id="Normal.68" name="distr">

        <parameter id="RealParameter.1763" spec="parameter.RealParameter"
estimate="false" name="mean">2.0</parameter>

        <parameter id="RealParameter.1764" spec="parameter.RealParameter"
estimate="false" name="sigma">1.0</parameter>

```

```

    </Normal>

  </prior>

  <prior id="ClockPrior.c:nd4L_pos3" name="distribution"
x="@clockRate.c:nd4L_pos3">

    <Normal id="Normal.69" name="distr">

      <parameter id="RealParameter.1765" spec="parameter.RealParameter"
estimate="false" name="mean">2.0</parameter>

      <parameter id="RealParameter.1766" spec="parameter.RealParameter"
estimate="false" name="sigma">1.0</parameter>

    </Normal>

  </prior>

  <prior id="ClockPrior.c:nd4_pos1" name="distribution" x="@clockRate.c:nd4_pos1">

    <Normal id="Normal.70" name="distr">

      <parameter id="RealParameter.1767" spec="parameter.RealParameter"
estimate="false" name="mean">2.0</parameter>

      <parameter id="RealParameter.1768" spec="parameter.RealParameter"
estimate="false" name="sigma">1.0</parameter>

    </Normal>

  </prior>

  <prior id="ClockPrior.c:nd4_pos2" name="distribution" x="@clockRate.c:nd4_pos2">

    <Normal id="Normal.71" name="distr">

      <parameter id="RealParameter.1769" spec="parameter.RealParameter"
estimate="false" name="mean">2.0</parameter>

      <parameter id="RealParameter.1770" spec="parameter.RealParameter"
estimate="false" name="sigma">1.0</parameter>

    </Normal>

  </prior>

  <prior id="ClockPrior.c:nd4_pos3" name="distribution" x="@clockRate.c:nd4_pos3">

    <Normal id="Normal.72" name="distr">

      <parameter id="RealParameter.1771" spec="parameter.RealParameter"
estimate="false" name="mean">2.0</parameter>

      <parameter id="RealParameter.1772" spec="parameter.RealParameter"
estimate="false" name="sigma">1.0</parameter>

    </Normal>

  </prior>

```



```

<prior id="ClockPrior.c:nd5_pos1" name="distribution" x="@clockRate.c:nd5_pos1">
  <Normal id="Normal.73" name="distr">
    <parameter id="RealParameter.1773" spec="parameter.RealParameter"
estimate="false" name="mean">2.0</parameter>
    <parameter id="RealParameter.1774" spec="parameter.RealParameter"
estimate="false" name="sigma">1.0</parameter>
  </Normal>
</prior>

<prior id="ClockPrior.c:nd5_pos2" name="distribution" x="@clockRate.c:nd5_pos2">
  <Normal id="Normal.74" name="distr">
    <parameter id="RealParameter.1775" spec="parameter.RealParameter"
estimate="false" name="mean">2.0</parameter>
    <parameter id="RealParameter.1776" spec="parameter.RealParameter"
estimate="false" name="sigma">1.0</parameter>
  </Normal>
</prior>

<prior id="ClockPrior.c:nd5_pos3" name="distribution" x="@clockRate.c:nd5_pos3">
  <Normal id="Normal.75" name="distr">
    <parameter id="RealParameter.1777" spec="parameter.RealParameter"
estimate="false" name="mean">2.0</parameter>
    <parameter id="RealParameter.1778" spec="parameter.RealParameter"
estimate="false" name="sigma">1.0</parameter>
  </Normal>
</prior>

<prior id="ClockPrior.c:nd6_pos1" name="distribution" x="@clockRate.c:nd6_pos1">
  <Normal id="Normal.76" name="distr">
    <parameter id="RealParameter.1779" spec="parameter.RealParameter"
estimate="false" name="mean">2.0</parameter>
    <parameter id="RealParameter.1780" spec="parameter.RealParameter"
estimate="false" name="sigma">1.0</parameter>
  </Normal>
</prior>

<prior id="ClockPrior.c:nd6_pos2" name="distribution" x="@clockRate.c:nd6_pos2">
  <Normal id="Normal.77" name="distr">

```

```

    <parameter id="RealParameter.1781" spec="parameter.RealParameter"
estimate="false" name="mean">2.0</parameter>

    <parameter id="RealParameter.1782" spec="parameter.RealParameter"
estimate="false" name="sigma">1.0</parameter>

    </Normal>

</prior>

<prior id="ClockPrior.c:nd6_pos3" name="distribution" x="@clockRate.c:nd6_pos3">

    <Normal id="Normal.78" name="distr">

        <parameter id="RealParameter.1783" spec="parameter.RealParameter"
estimate="false" name="mean">2.0</parameter>

        <parameter id="RealParameter.1784" spec="parameter.RealParameter"
estimate="false" name="sigma">1.0</parameter>

    </Normal>

</prior>

<prior id="HyperPrior.hyperGamma-alpha-CalibratedYuleBirthRatePrior.t:nd5_pos2"
name="distribution" x="@parameter.hyperGamma-alpha-
CalibratedYuleBirthRatePrior.t:nd5_pos2">

    <LogNormal id="LogNormalDistributionModel.160" name="distr">

        <parameter id="RealParameter.1683" spec="parameter.RealParameter"
estimate="false" name="M">1.0</parameter>

        <parameter id="RealParameter.1684" spec="parameter.RealParameter"
estimate="false" lower="0.0" name="S" upper="5.0">1.25</parameter>

    </LogNormal>

</prior>

<prior id="HyperPrior.hyperGamma-alpha-ClockPrior.c:Fl26seq-pt8-11401-123ps4"
name="distribution" x="@parameter.hyperGamma-alpha-ClockPrior.c:Fl26seq-pt8-11401-
123ps4">

    <LogNormal id="LogNormalDistributionModel.161" name="distr">

        <parameter id="RealParameter.1691" spec="parameter.RealParameter"
estimate="false" name="M">1.0</parameter>

        <parameter id="RealParameter.1692" spec="parameter.RealParameter"
estimate="false" lower="0.0" name="S" upper="5.0">1.25</parameter>

    </LogNormal>

</prior>

<prior id="HyperPrior.hyperGamma-alpha-Fl26sq-Par-oliv+Pleuro" name="distribution"
x="@parameter.hyperGamma-alpha-Fl26sq-Par-oliv+Pleuro">

```

```

    <LogNormal id="LogNormalDistributionModel.162" name="distr">
      <parameter id="RealParameter.1695" spec="parameter.RealParameter"
estimate="false" name="M">1.0</parameter>

      <parameter id="RealParameter.1698" spec="parameter.RealParameter"
estimate="false" lower="0.0" name="S" upper="5.0">1.25</parameter>

    </LogNormal>

  </prior>

  <prior id="HyperPrior.hyperGamma-alpha-HyperPrior.hyperGamma-alpha-
HyperPrior.hyperGamma-alpha-HyperPrior.hyperLogNormalDistributionModel-M-Fl26sq-Par-
oliv+Pleuro" name="distribution" x="@parameter.hyperGamma-alpha-
HyperPrior.hyperGamma-alpha-HyperPrior.hyperGamma-alpha-
HyperPrior.hyperLogNormalDistributionModel-M-Fl26sq-Par-oliv+Pleuro">

    <LogNormal id="LogNormalDistributionModel.163" name="distr">

      <parameter id="RealParameter.1753" spec="parameter.RealParameter"
estimate="false" name="M">1.0</parameter>

      <parameter id="RealParameter.1754" spec="parameter.RealParameter"
estimate="false" lower="0.0" name="S" upper="5.0">1.25</parameter>

    </LogNormal>

  </prior>

  <prior id="HyperPrior.hyperGamma-alpha-HyperPrior.hyperGamma-alpha-
HyperPrior.hyperLogNormalDistributionModel-M-Fl26sq-Par-oliv+Pleuro" name="distribution"
x="@parameter.hyperGamma-alpha-HyperPrior.hyperGamma-alpha-
HyperPrior.hyperLogNormalDistributionModel-M-Fl26sq-Par-oliv+Pleuro">

    <LogNormal id="LogNormalDistributionModel.164" name="distr">

      <parameter id="RealParameter.1807" spec="parameter.RealParameter"
estimate="false" name="M">1.0</parameter>

      <parameter id="RealParameter.1808" spec="parameter.RealParameter"
estimate="false" lower="0.0" name="S" upper="5.0">1.25</parameter>

    </LogNormal>

  </prior>

  <prior id="HyperPrior.hyperGamma-alpha-
HyperPrior.hyperLogNormalDistributionModel-M-Fl26sq-Par-oliv+Pleuro" name="distribution"
x="@parameter.hyperGamma-alpha-HyperPrior.hyperLogNormalDistributionModel-M-Fl26sq-
Par-oliv+Pleuro">

    <LogNormal id="LogNormalDistributionModel.165" name="distr">

      <parameter id="RealParameter.1809" spec="parameter.RealParameter"
estimate="false" name="M">1.0</parameter>

```

```

    <parameter id="RealParameter.1810" spec="parameter.RealParameter"
estimate="false" lower="0.0" name="S" upper="5.0">1.25</parameter>

    </LogNormal>

</prior>

<prior id="HyperPrior.hyperGamma-alpha-UCMeanRatePrior.c:atp6_pos1"
name="distribution" x="@parameter.hyperGamma-alpha-UCMeanRatePrior.c:atp6_pos1">

    <LogNormal id="LogNormalDistributionModel.166" name="distr">

        <parameter id="RealParameter.1811" spec="parameter.RealParameter"
estimate="false" name="M">1.0</parameter>

        <parameter id="RealParameter.1812" spec="parameter.RealParameter"
estimate="false" lower="0.0" name="S" upper="5.0">1.25</parameter>

        </LogNormal>

    </prior>

<prior id="HyperPrior.hyperGamma-beta-CalibratedYuleBirthRatePrior.t:nd5_pos2"
name="distribution" x="@parameter.hyperGamma-beta-
CalibratedYuleBirthRatePrior.t:nd5_pos2">

    <LogNormal id="LogNormalDistributionModel.167" name="distr">

        <parameter id="RealParameter.1813" spec="parameter.RealParameter"
estimate="false" name="M">1.0</parameter>

        <parameter id="RealParameter.1814" spec="parameter.RealParameter"
estimate="false" lower="0.0" name="S" upper="5.0">1.25</parameter>

        </LogNormal>

    </prior>

<prior id="HyperPrior.hyperGamma-beta-ClockPrior.c:Fl26seq-pt8-11401-123ps4"
name="distribution" x="@parameter.hyperGamma-beta-ClockPrior.c:Fl26seq-pt8-11401-
123ps4">

    <LogNormal id="LogNormalDistributionModel.168" name="distr">

        <parameter id="RealParameter.1815" spec="parameter.RealParameter"
estimate="false" name="M">1.0</parameter>

        <parameter id="RealParameter.1816" spec="parameter.RealParameter"
estimate="false" lower="0.0" name="S" upper="5.0">1.25</parameter>

        </LogNormal>

    </prior>

<prior id="HyperPrior.hyperGamma-beta-Fl26sq-Par-oliv+Pleuro" name="distribution"
x="@parameter.hyperGamma-beta-Fl26sq-Par-oliv+Pleuro">

    <LogNormal id="LogNormalDistributionModel.169" name="distr">

```

<parameter id="RealParameter.1817" spec="parameter.RealParameter"  
estimate="false" name="M">1.0</parameter>

<parameter id="RealParameter.1818" spec="parameter.RealParameter"  
estimate="false" lower="0.0" name="S" upper="5.0">1.25</parameter>

</LogNormal>

</prior>

<prior id="HyperPrior.hyperGamma-beta-HyperPrior.hyperGamma-alpha-  
HyperPrior.hyperGamma-alpha-HyperPrior.hyperLogNormalDistributionModel-M-Fl26sq-Par-  
oliv+Pleuro" name="distribution" x="@parameter.hyperGamma-beta-HyperPrior.hyperGamma-  
alpha-HyperPrior.hyperGamma-alpha-HyperPrior.hyperLogNormalDistributionModel-M-  
Fl26sq-Par-oliv+Pleuro">

<LogNormal id="LogNormalDistributionModel.172" name="distr">

<parameter id="RealParameter.1699" spec="parameter.RealParameter"  
estimate="false" name="M">1.0</parameter>

<parameter id="RealParameter.1700" spec="parameter.RealParameter"  
estimate="false" lower="0.0" name="S" upper="5.0">1.25</parameter>

</LogNormal>

</prior>

<prior id="HyperPrior.hyperGamma-beta-HyperPrior.hyperGamma-alpha-  
HyperPrior.hyperLogNormalDistributionModel-M-Fl26sq-Par-oliv+Pleuro" name="distribution"  
x="@parameter.hyperGamma-beta-HyperPrior.hyperGamma-alpha-  
HyperPrior.hyperLogNormalDistributionModel-M-Fl26sq-Par-oliv+Pleuro">

<LogNormal id="LogNormalDistributionModel.173" name="distr">

<parameter id="RealParameter.1701" spec="parameter.RealParameter"  
estimate="false" name="M">1.0</parameter>

<parameter id="RealParameter.1702" spec="parameter.RealParameter"  
estimate="false" lower="0.0" name="S" upper="5.0">1.25</parameter>

</LogNormal>

</prior>

<prior id="HyperPrior.hyperGamma-beta-  
HyperPrior.hyperLogNormalDistributionModel-M-Fl26sq-Par-oliv+Pleuro" name="distribution"  
x="@parameter.hyperGamma-beta-HyperPrior.hyperLogNormalDistributionModel-M-Fl26sq-  
Par-oliv+Pleuro">

<LogNormal id="LogNormalDistributionModel.174" name="distr">

<parameter id="RealParameter.1703" spec="parameter.RealParameter"  
estimate="false" name="M">1.0</parameter>

<parameter id="RealParameter.1704" spec="parameter.RealParameter"  
estimate="false" lower="0.0" name="S" upper="5.0">1.25</parameter>

```

    </LogNormal>

  </prior>

  <prior id="HyperPrior.hyperGamma-beta-UCMeanRatePrior.c:atp6_pos1"
name="distribution" x="@parameter.hyperGamma-beta-UCMeanRatePrior.c:atp6_pos1">

    <LogNormal id="LogNormalDistributionModel.175" name="distr">

      <parameter id="RealParameter.1705" spec="parameter.RealParameter"
estimate="false" name="M">1.0</parameter>

      <parameter id="RealParameter.1706" spec="parameter.RealParameter"
estimate="false" lower="0.0" name="S" upper="5.0">1.25</parameter>

    </LogNormal>

  </prior>

  <prior id="HyperPrior.hyperLogNormalDistributionModel-M-Fl26sq-Par-oliv+Pleuro"
name="distribution" x="@parameter.hyperLogNormalDistributionModel-M-Fl26sq-Par-
oliv+Pleuro">

    <LogNormal id="LogNormalDistributionModel.176" name="distr">

      <parameter id="RealParameter.1708" spec="parameter.RealParameter"
estimate="false" name="M">1.0</parameter>

      <parameter id="RealParameter.1709" spec="parameter.RealParameter"
estimate="false" lower="0.0" name="S" upper="5.0">1.25</parameter>

    </LogNormal>

  </prior>

  <prior id="HyperPrior.hyperLogNormalDistributionModel-M-Fl26sq-Par-
oliv+Pleuro1.prior" name="distribution" x="@parameter.hyperLogNormalDistributionModel-
M-Fl26sq-Par-oliv+Pleuro1.prior">

    <LogNormal id="LogNormalDistributionModel.177" name="distr">

      <parameter id="RealParameter.1710" spec="parameter.RealParameter"
estimate="false" name="M">1.0</parameter>

      <parameter id="RealParameter.1711" spec="parameter.RealParameter"
estimate="false" lower="0.0" name="S" upper="5.0">1.25</parameter>

    </LogNormal>

  </prior>

  <prior id="HyperPrior.hyperLogNormalDistributionModel-S-Fl26sq-Par-oliv+Pleuro"
name="distribution" x="@parameter.hyperLogNormalDistributionModel-S-Fl26sq-Par-
oliv+Pleuro">

    <LogNormal id="LogNormalDistributionModel.178" name="distr">

      <parameter id="RealParameter.1712" spec="parameter.RealParameter"
estimate="false" name="M">1.0</parameter>

```

```

        <parameter id="RealParameter.1713" spec="parameter.RealParameter"
estimate="false" lower="0.0" name="S" upper="5.0">1.25</parameter>

    </LogNormal>

</prior>

<prior id="HyperPrior.hyperLogNormalDistributionModel-S-Fl26sq-Par-
oliv+Pleuro1.prior" name="distribution" x="@parameter.hyperLogNormalDistributionModel-S-
Fl26sq-Par-oliv+Pleuro1.prior">

    <LogNormal id="LogNormalDistributionModel.179" name="distr">

        <parameter id="RealParameter.1714" spec="parameter.RealParameter"
estimate="false" name="M">1.0</parameter>

        <parameter id="RealParameter.1715" spec="parameter.RealParameter"
estimate="false" lower="0.0" name="S" upper="5.0">1.25</parameter>

    </LogNormal>

</prior>

<prior id="PopSizePrior.t:Fl26seq-pt8-11401-123ps4" name="distribution"
x="@popSize.t:Fl26seq-pt8-11401-123ps4">

    <OneOnX id="OneOnX.157" name="distr"/>

</prior>

<prior id="PopSizePrior.t:atp6_pos1" name="distribution" x="@popSize.t:atp6_pos1">

    <OneOnX id="OneOnX.1" name="distr"/>

</prior>

<prior id="PopSizePrior.t:atp6_pos2" name="distribution" x="@popSize.t:atp6_pos2">

    <OneOnX id="OneOnX.5" name="distr"/>

</prior>

<prior id="PopSizePrior.t:atp6_pos3" name="distribution" x="@popSize.t:atp6_pos3">

    <OneOnX id="OneOnX.9" name="distr"/>

</prior>

<prior id="PopSizePrior.t:atp8_pos1" name="distribution" x="@popSize.t:atp8_pos1">

    <OneOnX id="OneOnX.13" name="distr"/>

</prior>

<prior id="PopSizePrior.t:atp8_pos2" name="distribution" x="@popSize.t:atp8_pos2">

    <OneOnX id="OneOnX.17" name="distr"/>

</prior>

<prior id="PopSizePrior.t:atp8_pos3" name="distribution" x="@popSize.t:atp8_pos3">

```

```

    <OneOnX id="OneOnX.21" name="distr"/>
</prior>
<prior id="PopSizePrior.t:coi_pos1" name="distribution" x="@popSize.t:coi_pos1">
    <OneOnX id="OneOnX.25" name="distr"/>
</prior>
<prior id="PopSizePrior.t:coi_pos2" name="distribution" x="@popSize.t:coi_pos2">
    <OneOnX id="OneOnX.29" name="distr"/>
</prior>
<prior id="PopSizePrior.t:coi_pos3" name="distribution" x="@popSize.t:coi_pos3">
    <OneOnX id="OneOnX.33" name="distr"/>
</prior>
<prior id="PopSizePrior.t:coii_pos1" name="distribution" x="@popSize.t:coii_pos1">
    <OneOnX id="OneOnX.37" name="distr"/>
</prior>
<prior id="PopSizePrior.t:coii_pos2" name="distribution" x="@popSize.t:coii_pos2">
    <OneOnX id="OneOnX.41" name="distr"/>
</prior>
<prior id="PopSizePrior.t:coii_pos3" name="distribution" x="@popSize.t:coii_pos3">
    <OneOnX id="OneOnX.45" name="distr"/>
</prior>
<prior id="PopSizePrior.t:coiii_pos1" name="distribution" x="@popSize.t:coiii_pos1">
    <OneOnX id="OneOnX.49" name="distr"/>
</prior>
<prior id="PopSizePrior.t:coiii_pos2" name="distribution" x="@popSize.t:coiii_pos2">
    <OneOnX id="OneOnX.53" name="distr"/>
</prior>
<prior id="PopSizePrior.t:coiii_pos3" name="distribution" x="@popSize.t:coiii_pos3">
    <OneOnX id="OneOnX.57" name="distr"/>
</prior>
<prior id="PopSizePrior.t:cytb_pos1" name="distribution" x="@popSize.t:cytb_pos1">
    <OneOnX id="OneOnX.61" name="distr"/>
</prior>

```



```

<prior id="PopSizePrior.t:cytb_pos2" name="distribution" x="@popSize.t:cytb_pos2">
  <OneOnX id="OneOnX.65" name="distr"/>
</prior>

<prior id="PopSizePrior.t:cytb_pos3" name="distribution" x="@popSize.t:cytb_pos3">
  <OneOnX id="OneOnX.69" name="distr"/>
</prior>

<prior id="PopSizePrior.t:nd1_pos1" name="distribution" x="@popSize.t:nd1_pos1">
  <OneOnX id="OneOnX.73" name="distr"/>
</prior>

<prior id="PopSizePrior.t:nd1_pos2" name="distribution" x="@popSize.t:nd1_pos2">
  <OneOnX id="OneOnX.77" name="distr"/>
</prior>

<prior id="PopSizePrior.t:nd1_pos3" name="distribution" x="@popSize.t:nd1_pos3">
  <OneOnX id="OneOnX.81" name="distr"/>
</prior>

<prior id="PopSizePrior.t:nd2_pos1" name="distribution" x="@popSize.t:nd2_pos1">
  <OneOnX id="OneOnX.85" name="distr"/>
</prior>

<prior id="PopSizePrior.t:nd2_pos2" name="distribution" x="@popSize.t:nd2_pos2">
  <OneOnX id="OneOnX.89" name="distr"/>
</prior>

<prior id="PopSizePrior.t:nd2_pos3" name="distribution" x="@popSize.t:nd2_pos3">
  <OneOnX id="OneOnX.93" name="distr"/>
</prior>

<prior id="PopSizePrior.t:nd3_pos1" name="distribution" x="@popSize.t:nd3_pos1">
  <OneOnX id="OneOnX.97" name="distr"/>
</prior>

<prior id="PopSizePrior.t:nd3_pos2" name="distribution" x="@popSize.t:nd3_pos2">
  <OneOnX id="OneOnX.101" name="distr"/>
</prior>

<prior id="PopSizePrior.t:nd3_pos3" name="distribution" x="@popSize.t:nd3_pos3">
  <OneOnX id="OneOnX.105" name="distr"/>

```

```

</prior>

<prior id="PopSizePrior.t:nd4L_pos1" name="distribution"
x="@popSize.t:nd4L_pos1">

  <OneOnX id="OneOnX.121" name="distr"/>

</prior>

<prior id="PopSizePrior.t:nd4L_pos2" name="distribution"
x="@popSize.t:nd4L_pos2">

  <OneOnX id="OneOnX.125" name="distr"/>

</prior>

<prior id="PopSizePrior.t:nd4L_pos3" name="distribution"
x="@popSize.t:nd4L_pos3">

  <OneOnX id="OneOnX.129" name="distr"/>

</prior>

<prior id="PopSizePrior.t:nd4_pos1" name="distribution" x="@popSize.t:nd4_pos1">

  <OneOnX id="OneOnX.109" name="distr"/>

</prior>

<prior id="PopSizePrior.t:nd4_pos2" name="distribution" x="@popSize.t:nd4_pos2">

  <OneOnX id="OneOnX.113" name="distr"/>

</prior>

<prior id="PopSizePrior.t:nd4_pos3" name="distribution" x="@popSize.t:nd4_pos3">

  <OneOnX id="OneOnX.117" name="distr"/>

</prior>

<prior id="PopSizePrior.t:nd5_pos1" name="distribution" x="@popSize.t:nd5_pos1">

  <OneOnX id="OneOnX.133" name="distr"/>

</prior>

<prior id="PopSizePrior.t:nd5_pos2" name="distribution" x="@popSize.t:nd5_pos2">

  <OneOnX id="OneOnX.137" name="distr"/>

</prior>

<prior id="PopSizePrior.t:nd5_pos3" name="distribution" x="@popSize.t:nd5_pos3">

  <OneOnX id="OneOnX.141" name="distr"/>

</prior>

<prior id="PopSizePrior.t:nd6_pos1" name="distribution" x="@popSize.t:nd6_pos1">

  <OneOnX id="OneOnX.145" name="distr"/>

```

```

</prior>

<prior id="PopSizePrior.t:nd6_pos2" name="distribution" x="@popSize.t:nd6_pos2">
  <OneOnX id="OneOnX.149" name="distr"/>
</prior>

<prior id="PopSizePrior.t:nd6_pos3" name="distribution" x="@popSize.t:nd6_pos3">
  <OneOnX id="OneOnX.153" name="distr"/>
</prior>

<prior id="UCMeanRatePrior.c:atp6_pos1" name="distribution"
x="@ucedMean.c:atp6_pos1">
  <Normal id="Normal.89" name="distr">
    <parameter id="RealParameter.1805" spec="parameter.RealParameter"
estimate="false" name="mean">0.0</parameter>
    <parameter id="RealParameter.1806" spec="parameter.RealParameter"
estimate="false" name="sigma">1.0</parameter>
  </Normal>
</prior>

<distribution id="Fl26sq-3Pleuro+Par-oliv+P.o.MRCA.prior"
spec="beast.math.distributions.MRCAPrior" monophyletic="true" tree="@Tree.t:Fl26seq-pt8-
11401-123ps4" useOriginate="true">
  <taxonset id="Fl26sq-3Pleuro+Par-oliv+P.o.MRCA" spec="TaxonSet">
    <taxon id="Cleisthenes_herzensteini_KT223828" spec="Taxon"/>
    <taxon id="Hippoglossoides_platessoides_MN122825" spec="Taxon"/>
    <taxon id="Hippoglossus_hippoglossus_AM749122" spec="Taxon"/>
    <taxon id="Hippoglossus_hippoglossus_AM749123" spec="Taxon"/>
    <taxon id="Hippoglossus_hippoglossus_AM749124" spec="Taxon"/>
    <taxon id="Hippoglossus_stenolepis_AM749126" spec="Taxon"/>
    <taxon id="Hippoglossus_stenolepis_AM749127" spec="Taxon"/>
    <taxon id="Hippoglossus_stenolepis_AM749128" spec="Taxon"/>
    <taxon id="Hippoglossus_stenolepis_AM749129" spec="Taxon"/>
    <taxon id="Limanda_aspera_KP013094" spec="Taxon"/>
    <taxon id="Limanda_limanda_MN122886" spec="Taxon"/>
    <taxon id="Platichthys_stellatus_Ps2011" spec="Taxon"/>
    <taxon id="Pseudopleuronectes_herzensteini_MW713061" spec="Taxon"/>
  </taxonset>
</distribution>

```

```

<taxon id="Pseudopleuronectes_yokohamae_KT224485" spec="Taxon"/>
<taxon id="Pseudopleuronectes_yokohamae_KT878309" spec="Taxon"/>
<taxon id="Reinhardtius_hippoglossoides_AM749130" spec="Taxon"/>
<taxon id="Reinhardtius_hippoglossoides_AM749131" spec="Taxon"/>
<taxon id="Reinhardtius_hippoglossoides_AM749132" spec="Taxon"/>
<taxon id="Reinhardtius_hippoglossoides_AM749133" spec="Taxon"/>
<taxon id="Verasper_moseri_EF025506" spec="Taxon"/>
<taxon id="Verasper_moseri_LC583747" spec="Taxon"/>
<taxon id="Verasper_variegatus_DQ403797" spec="Taxon"/>
<taxon id="Verasper_variegatus_MK210571" spec="Taxon"/>
</taxonset>

<Normal id="Normal.90" name="distr">
  <parameter id="RealParameter.1685" spec="parameter.RealParameter"
estimate="false" name="mean">46.19</parameter>
  <parameter id="RealParameter.1690" spec="parameter.RealParameter"
estimate="false" name="sigma">1.0</parameter>
</Normal>
</distribution>
</distribution>
<distribution id="likelihood" spec="util.CompoundDistribution">
  <distribution id="treeLikelihood.atp6_pos1" spec="TreeLikelihood" data="@atp6_pos1"
tree="@Tree.t:atp6_pos1" useAmbiguities="true">
    <siteModel id="SiteModel.s:atp6_pos1" spec="SiteModel"
gammaCategoryCount="4">
      <parameter id="mutationRate.s:atp6_pos1" spec="parameter.RealParameter"
estimate="false" name="mutationRate">2.0</parameter>
      <parameter id="gammaShape.s:atp6_pos1" spec="parameter.RealParameter"
estimate="false" name="shape">1.0</parameter>
      <parameter id="proportionInvariant.s:atp6_pos1" spec="parameter.RealParameter"
estimate="false" lower="0.0" name="proportionInvariant" upper="1.0">0.477</parameter>
    <substModel id="gtr.s:atp6_pos1" spec="GTR">
      <parameter id="rateAC.s:atp6_pos1" spec="parameter.RealParameter"
estimate="false" lower="0.0" name="rateAC">0.03</parameter>
      <parameter id="rateAG.s:atp6_pos1" spec="parameter.RealParameter"
estimate="false" lower="0.0" name="rateAG">0.18</parameter>
    </substModel>
  </distribution>
</distribution>

```

```

        <parameter id="rateAT.s:atp6_pos1" spec="parameter.RealParameter"
estimate="false" lower="0.0" name="rateAT">0.03</parameter>

        <parameter id="rateCG.s:atp6_pos1" spec="parameter.RealParameter"
estimate="false" lower="0.0" name="rateCG">0.02</parameter>

        <parameter id="rateCT.s:atp6_pos1" spec="parameter.RealParameter"
estimate="false" lower="0.0" name="rateCT">0.18</parameter>

        <parameter id="rateGT.s:atp6_pos1" spec="parameter.RealParameter"
estimate="false" lower="0.0" name="rateGT">0.02</parameter>

        <frequencies id="empiricalFreqs.s:atp6_pos1" spec="Frequencies"
data="@atp6_pos1"/>

    </substModel>

</siteModel>

    <branchRateModel id="ExponentialRelaxedClock.c:atp6_pos1"
spec="beast.evolution.branchratemodel.UCRelaxedClockModel"
clock.rate="@ucedMean.c:atp6_pos1" normalize="true"
rateCategories="@expRateCategories.c:atp6_pos1" tree="@Tree.t:atp6_pos1">

        <Exponential id="Exponential.c:atp6_pos1" name="distr">

            <parameter id="UCExpLambda.c:atp6_pos1" spec="parameter.RealParameter"
name="mean">1.0</parameter>

        </Exponential>

    </branchRateModel>

</distribution>

    <distribution id="treeLikelihood.atp6_pos2" spec="TreeLikelihood" data="@atp6_pos2"
tree="@Tree.t:atp6_pos2" useAmbiguities="true">

        <siteModel id="SiteModel.s:atp6_pos2" spec="SiteModel">

            <parameter id="mutationRate.s:atp6_pos2" spec="parameter.RealParameter"
estimate="false" name="mutationRate">1.0</parameter>

            <parameter id="gammaShape.s:atp6_pos2" spec="parameter.RealParameter"
estimate="false" name="shape">1.0</parameter>

            <parameter id="proportionInvariant.s:atp6_pos2" spec="parameter.RealParameter"
estimate="false" lower="0.0" name="proportionInvariant" upper="1.0">0.0</parameter>

        <substModel id="JC69.s:atp6_pos2" spec="JukesCantor"/>

    </siteModel>

    <branchRateModel id="StrictClock.c:atp6_pos2"
spec="beast.evolution.branchratemodel.StrictClockModel"
clock.rate="@clockRate.c:atp6_pos2"/>

</distribution>

```

```

    <distribution id="treeLikelihood.atp6_pos3" spec="TreeLikelihood" data="@atp6_pos3"
tree="@Tree.t:atp6_pos3" useAmbiguities="true">

        <siteModel id="SiteModel.s:atp6_pos3" spec="SiteModel">

            <parameter id="mutationRate.s:atp6_pos3" spec="parameter.RealParameter"
estimate="false" name="mutationRate">1.0</parameter>

            <parameter id="gammaShape.s:atp6_pos3" spec="parameter.RealParameter"
estimate="false" name="shape">1.0</parameter>

            <parameter id="proportionInvariant.s:atp6_pos3" spec="parameter.RealParameter"
estimate="false" lower="0.0" name="proportionInvariant" upper="1.0">0.0</parameter>

            <substModel id="JC69.s:atp6_pos3" spec="JukesCantor"/>

        </siteModel>

        <branchRateModel id="StrictClock.c:atp6_pos3"
spec="beast.evolution.branchratemodel.StrictClockModel"
clock.rate="@clockRate.c:atp6_pos3"/>

    </distribution>

    <distribution id="treeLikelihood.atp8_pos1" spec="TreeLikelihood" data="@atp8_pos1"
tree="@Tree.t:atp8_pos1" useAmbiguities="true">

        <siteModel id="SiteModel.s:atp8_pos1" spec="SiteModel">

            <parameter id="mutationRate.s:atp8_pos1" spec="parameter.RealParameter"
estimate="false" name="mutationRate">1.0</parameter>

            <parameter id="gammaShape.s:atp8_pos1" spec="parameter.RealParameter"
estimate="false" name="shape">1.0</parameter>

            <parameter id="proportionInvariant.s:atp8_pos1" spec="parameter.RealParameter"
estimate="false" lower="0.0" name="proportionInvariant" upper="1.0">0.0</parameter>

            <substModel id="JC69.s:atp8_pos1" spec="JukesCantor"/>

        </siteModel>

        <branchRateModel id="StrictClock.c:atp8_pos1"
spec="beast.evolution.branchratemodel.StrictClockModel"
clock.rate="@clockRate.c:atp8_pos1"/>

    </distribution>

    <distribution id="treeLikelihood.atp8_pos2" spec="TreeLikelihood" data="@atp8_pos2"
tree="@Tree.t:atp8_pos2" useAmbiguities="true">

        <siteModel id="SiteModel.s:atp8_pos2" spec="SiteModel">

            <parameter id="mutationRate.s:atp8_pos2" spec="parameter.RealParameter"
estimate="false" name="mutationRate">1.0</parameter>

            <parameter id="gammaShape.s:atp8_pos2" spec="parameter.RealParameter"
estimate="false" name="shape">1.0</parameter>

```

```

        <parameter id="proportionInvariant.s:atp8_pos2" spec="parameter.RealParameter"
estimate="false" lower="0.0" name="proportionInvariant" upper="1.0">0.0</parameter>

        <substModel id="JC69.s:atp8_pos2" spec="JukesCantor"/>

    </siteModel>

    <branchRateModel id="StrictClock.c:atp8_pos2"
spec="beast.evolution.branchratemodel.StrictClockModel"
clock.rate="@clockRate.c:atp8_pos2"/>

</distribution>

    <distribution id="treeLikelihood.atp8_pos3" spec="TreeLikelihood" data="@atp8_pos3"
tree="@Tree.t:atp8_pos3" useAmbiguities="true">

        <siteModel id="SiteModel.s:atp8_pos3" spec="SiteModel">

            <parameter id="mutationRate.s:atp8_pos3" spec="parameter.RealParameter"
estimate="false" name="mutationRate">1.0</parameter>

            <parameter id="gammaShape.s:atp8_pos3" spec="parameter.RealParameter"
estimate="false" name="shape">1.0</parameter>

            <parameter id="proportionInvariant.s:atp8_pos3" spec="parameter.RealParameter"
estimate="false" lower="0.0" name="proportionInvariant" upper="1.0">0.0</parameter>

            <substModel id="JC69.s:atp8_pos3" spec="JukesCantor"/>

        </siteModel>

        <branchRateModel id="StrictClock.c:atp8_pos3"
spec="beast.evolution.branchratemodel.StrictClockModel"
clock.rate="@clockRate.c:atp8_pos3"/>

    </distribution>

    <distribution id="treeLikelihood.coi_pos1" spec="TreeLikelihood" data="@coi_pos1"
tree="@Tree.t:coi_pos1" useAmbiguities="true">

        <siteModel id="SiteModel.s:coi_pos1" spec="SiteModel">

            <parameter id="mutationRate.s:coi_pos1" spec="parameter.RealParameter"
estimate="false" name="mutationRate">1.0</parameter>

            <parameter id="gammaShape.s:coi_pos1" spec="parameter.RealParameter"
estimate="false" name="shape">1.0</parameter>

            <parameter id="proportionInvariant.s:coi_pos1" spec="parameter.RealParameter"
estimate="false" lower="0.0" name="proportionInvariant" upper="1.0">0.0</parameter>

            <substModel id="JC69.s:coi_pos1" spec="JukesCantor"/>

        </siteModel>

        <branchRateModel id="StrictClock.c:coi_pos1"
spec="beast.evolution.branchratemodel.StrictClockModel"
clock.rate="@clockRate.c:coi_pos1"/>

```

```

</distribution>

<distribution id="treeLikelihood.coi_pos2" spec="TreeLikelihood" data="@coi_pos2"
tree="@Tree.t:coi_pos2" useAmbiguities="true">

  <siteModel id="SiteModel.s:coi_pos2" spec="SiteModel">

    <parameter id="mutationRate.s:coi_pos2" spec="parameter.RealParameter"
estimate="false" name="mutationRate">1.0</parameter>

    <parameter id="gammaShape.s:coi_pos2" spec="parameter.RealParameter"
estimate="false" name="shape">1.0</parameter>

    <parameter id="proportionInvariant.s:coi_pos2" spec="parameter.RealParameter"
estimate="false" lower="0.0" name="proportionInvariant" upper="1.0">0.0</parameter>

    <substModel id="JC69.s:coi_pos2" spec="JukesCantor"/>

  </siteModel>

  <branchRateModel id="StrictClock.c:coi_pos2"
spec="beast.evolution.branchratemodel.StrictClockModel"
clock.rate="@clockRate.c:coi_pos2"/>

</distribution>

<distribution id="treeLikelihood.coi_pos3" spec="TreeLikelihood" data="@coi_pos3"
tree="@Tree.t:coi_pos3" useAmbiguities="true">

  <siteModel id="SiteModel.s:coi_pos3" spec="SiteModel">

    <parameter id="mutationRate.s:coi_pos3" spec="parameter.RealParameter"
estimate="false" name="mutationRate">1.0</parameter>

    <parameter id="gammaShape.s:coi_pos3" spec="parameter.RealParameter"
estimate="false" name="shape">1.0</parameter>

    <parameter id="proportionInvariant.s:coi_pos3" spec="parameter.RealParameter"
estimate="false" lower="0.0" name="proportionInvariant" upper="1.0">0.0</parameter>

    <substModel id="JC69.s:coi_pos3" spec="JukesCantor"/>

  </siteModel>

  <branchRateModel id="StrictClock.c:coi_pos3"
spec="beast.evolution.branchratemodel.StrictClockModel"
clock.rate="@clockRate.c:coi_pos3"/>

</distribution>

<distribution id="treeLikelihood.coii_pos1" spec="TreeLikelihood" data="@coii_pos1"
tree="@Tree.t:coii_pos1" useAmbiguities="true">

  <siteModel id="SiteModel.s:coii_pos1" spec="SiteModel">

    <parameter id="mutationRate.s:coii_pos1" spec="parameter.RealParameter"
estimate="false" name="mutationRate">1.0</parameter>

```



```

    <parameter id="gammaShape.s:coii_pos1" spec="parameter.RealParameter"
estimate="false" name="shape">1.0</parameter>

    <parameter id="proportionInvariant.s:coii_pos1" spec="parameter.RealParameter"
estimate="false" lower="0.0" name="proportionInvariant" upper="1.0">0.0</parameter>

    <substModel id="JC69.s:coii_pos1" spec="JukesCantor"/>

</siteModel>

    <branchRateModel id="StrictClock.c:coii_pos1"
spec="beast.evolution.branchratemodel.StrictClockModel"
clock.rate="@clockRate.c:coii_pos1"/>

</distribution>

    <distribution id="treeLikelihood.coii_pos2" spec="TreeLikelihood" data="@coii_pos2"
tree="@Tree.t:coii_pos2" useAmbiguities="true">

    <siteModel id="SiteModel.s:coii_pos2" spec="SiteModel">

        <parameter id="mutationRate.s:coii_pos2" spec="parameter.RealParameter"
estimate="false" name="mutationRate">1.0</parameter>

        <parameter id="gammaShape.s:coii_pos2" spec="parameter.RealParameter"
estimate="false" name="shape">1.0</parameter>

        <parameter id="proportionInvariant.s:coii_pos2" spec="parameter.RealParameter"
estimate="false" lower="0.0" name="proportionInvariant" upper="1.0">0.0</parameter>

        <substModel id="JC69.s:coii_pos2" spec="JukesCantor"/>

    </siteModel>

    <branchRateModel id="StrictClock.c:coii_pos2"
spec="beast.evolution.branchratemodel.StrictClockModel"
clock.rate="@clockRate.c:coii_pos2"/>

</distribution>

    <distribution id="treeLikelihood.coii_pos3" spec="TreeLikelihood" data="@coii_pos3"
tree="@Tree.t:coii_pos3" useAmbiguities="true">

    <siteModel id="SiteModel.s:coii_pos3" spec="SiteModel">

        <parameter id="mutationRate.s:coii_pos3" spec="parameter.RealParameter"
estimate="false" name="mutationRate">1.0</parameter>

        <parameter id="gammaShape.s:coii_pos3" spec="parameter.RealParameter"
estimate="false" name="shape">1.0</parameter>

        <parameter id="proportionInvariant.s:coii_pos3" spec="parameter.RealParameter"
estimate="false" lower="0.0" name="proportionInvariant" upper="1.0">0.0</parameter>

        <substModel id="JC69.s:coii_pos3" spec="JukesCantor"/>

    </siteModel>

```

```

    <branchRateModel id="StrictClock.c:coii_pos3"
spec="beast.evolution.branchratemodel.StrictClockModel"
clock.rate="@clockRate.c:coii_pos3"/>

</distribution>

<distribution id="treeLikelihood.coiii_pos1" spec="TreeLikelihood" data="@coiii_pos1"
tree="@Tree.t:coiii_pos1" useAmbiguities="true">

    <siteModel id="SiteModel.s:coiii_pos1" spec="SiteModel">

        <parameter id="mutationRate.s:coiii_pos1" spec="parameter.RealParameter"
estimate="false" name="mutationRate">1.0</parameter>

        <parameter id="gammaShape.s:coiii_pos1" spec="parameter.RealParameter"
estimate="false" name="shape">1.0</parameter>

        <parameter id="proportionInvariant.s:coiii_pos1" spec="parameter.RealParameter"
estimate="false" lower="0.0" name="proportionInvariant" upper="1.0">0.0</parameter>

        <substModel id="JC69.s:coiii_pos1" spec="JukesCantor"/>

    </siteModel>

    <branchRateModel id="StrictClock.c:coiii_pos1"
spec="beast.evolution.branchratemodel.StrictClockModel"
clock.rate="@clockRate.c:coiii_pos1"/>

</distribution>

<distribution id="treeLikelihood.coiii_pos2" spec="TreeLikelihood" data="@coiii_pos2"
tree="@Tree.t:coiii_pos2" useAmbiguities="true">

    <siteModel id="SiteModel.s:coiii_pos2" spec="SiteModel">

        <parameter id="mutationRate.s:coiii_pos2" spec="parameter.RealParameter"
estimate="false" name="mutationRate">1.0</parameter>

        <parameter id="gammaShape.s:coiii_pos2" spec="parameter.RealParameter"
estimate="false" name="shape">1.0</parameter>

        <parameter id="proportionInvariant.s:coiii_pos2" spec="parameter.RealParameter"
estimate="false" lower="0.0" name="proportionInvariant" upper="1.0">0.0</parameter>

        <substModel id="JC69.s:coiii_pos2" spec="JukesCantor"/>

    </siteModel>

    <branchRateModel id="StrictClock.c:coiii_pos2"
spec="beast.evolution.branchratemodel.StrictClockModel"
clock.rate="@clockRate.c:coiii_pos2"/>

</distribution>

<distribution id="treeLikelihood.coiii_pos3" spec="TreeLikelihood" data="@coiii_pos3"
tree="@Tree.t:coiii_pos3" useAmbiguities="true">

    <siteModel id="SiteModel.s:coiii_pos3" spec="SiteModel">

```

```

    <parameter id="mutationRate.s:coiii_pos3" spec="parameter.RealParameter"
estimate="false" name="mutationRate">1.0</parameter>

    <parameter id="gammaShape.s:coiii_pos3" spec="parameter.RealParameter"
estimate="false" name="shape">1.0</parameter>

    <parameter id="proportionInvariant.s:coiii_pos3" spec="parameter.RealParameter"
estimate="false" lower="0.0" name="proportionInvariant" upper="1.0">0.0</parameter>

    <substModel id="JC69.s:coiii_pos3" spec="JukesCantor"/>

</siteModel>

    <branchRateModel id="StrictClock.c:coiii_pos3"
spec="beast.evolution.branchratemodel.StrictClockModel"
clock.rate="@clockRate.c:coiii_pos3"/>

</distribution>

    <distribution id="treeLikelihood.cytb_pos1" spec="TreeLikelihood" data="@cytb_pos1"
tree="@Tree.t:cytb_pos1" useAmbiguities="true">

    <siteModel id="SiteModel.s:cytb_pos1" spec="SiteModel">

        <parameter id="mutationRate.s:cytb_pos1" spec="parameter.RealParameter"
estimate="false" name="mutationRate">1.0</parameter>

        <parameter id="gammaShape.s:cytb_pos1" spec="parameter.RealParameter"
estimate="false" name="shape">1.0</parameter>

        <parameter id="proportionInvariant.s:cytb_pos1" spec="parameter.RealParameter"
estimate="false" lower="0.0" name="proportionInvariant" upper="1.0">0.0</parameter>

        <substModel id="JC69.s:cytb_pos1" spec="JukesCantor"/>

    </siteModel>

    <branchRateModel id="StrictClock.c:cytb_pos1"
spec="beast.evolution.branchratemodel.StrictClockModel"
clock.rate="@clockRate.c:cytb_pos1"/>

</distribution>

    <distribution id="treeLikelihood.cytb_pos2" spec="TreeLikelihood" data="@cytb_pos2"
tree="@Tree.t:cytb_pos2" useAmbiguities="true">

    <siteModel id="SiteModel.s:cytb_pos2" spec="SiteModel">

        <parameter id="mutationRate.s:cytb_pos2" spec="parameter.RealParameter"
estimate="false" name="mutationRate">1.0</parameter>

        <parameter id="gammaShape.s:cytb_pos2" spec="parameter.RealParameter"
estimate="false" name="shape">1.0</parameter>

        <parameter id="proportionInvariant.s:cytb_pos2" spec="parameter.RealParameter"
estimate="false" lower="0.0" name="proportionInvariant" upper="1.0">0.0</parameter>

        <substModel id="JC69.s:cytb_pos2" spec="JukesCantor"/>

```

```

</siteModel>

<branchRateModel id="StrictClock.c:cytb_pos2"
spec="beast.evolution.branchratemodel.StrictClockModel"
clock.rate="@clockRate.c:cytb_pos2"/>

</distribution>

<distribution id="treeLikelihood.cytb_pos3" spec="TreeLikelihood" data="@cytb_pos3"
tree="@Tree.t:cytb_pos3" useAmbiguities="true">

<siteModel id="SiteModel.s:cytb_pos3" spec="SiteModel">

<parameter id="mutationRate.s:cytb_pos3" spec="parameter.RealParameter"
estimate="false" name="mutationRate">1.0</parameter>

<parameter id="gammaShape.s:cytb_pos3" spec="parameter.RealParameter"
estimate="false" name="shape">1.0</parameter>

<parameter id="proportionInvariant.s:cytb_pos3" spec="parameter.RealParameter"
estimate="false" lower="0.0" name="proportionInvariant" upper="1.0">0.0</parameter>

<substModel id="JC69.s:cytb_pos3" spec="JukesCantor"/>

</siteModel>

<branchRateModel id="StrictClock.c:cytb_pos3"
spec="beast.evolution.branchratemodel.StrictClockModel"
clock.rate="@clockRate.c:cytb_pos3"/>

</distribution>

<distribution id="treeLikelihood.nd1_pos1" spec="TreeLikelihood" data="@nd1_pos1"
tree="@Tree.t:nd1_pos1" useAmbiguities="true">

<siteModel id="SiteModel.s:nd1_pos1" spec="SiteModel">

<parameter id="mutationRate.s:nd1_pos1" spec="parameter.RealParameter"
estimate="false" name="mutationRate">1.0</parameter>

<parameter id="gammaShape.s:nd1_pos1" spec="parameter.RealParameter"
estimate="false" name="shape">1.0</parameter>

<parameter id="proportionInvariant.s:nd1_pos1" spec="parameter.RealParameter"
estimate="false" lower="0.0" name="proportionInvariant" upper="1.0">0.0</parameter>

<substModel id="JC69.s:nd1_pos1" spec="JukesCantor"/>

</siteModel>

<branchRateModel id="StrictClock.c:nd1_pos1"
spec="beast.evolution.branchratemodel.StrictClockModel"
clock.rate="@clockRate.c:nd1_pos1"/>

</distribution>

<distribution id="treeLikelihood.nd1_pos2" spec="TreeLikelihood" data="@nd1_pos2"
tree="@Tree.t:nd1_pos2" useAmbiguities="true">

```

```

    <siteModel id="SiteModel.s:nd1_pos2" spec="SiteModel">
      <parameter id="mutationRate.s:nd1_pos2" spec="parameter.RealParameter"
estimate="false" name="mutationRate">1.0</parameter>
      <parameter id="gammaShape.s:nd1_pos2" spec="parameter.RealParameter"
estimate="false" name="shape">1.0</parameter>
      <parameter id="proportionInvariant.s:nd1_pos2" spec="parameter.RealParameter"
estimate="false" lower="0.0" name="proportionInvariant" upper="1.0">0.0</parameter>
      <substModel id="JC69.s:nd1_pos2" spec="JukesCantor"/>
    </siteModel>

    <branchRateModel id="StrictClock.c:nd1_pos2"
spec="beast.evolution.branchratemodel.StrictClockModel"
clock.rate="@clockRate.c:nd1_pos2"/>

  </distribution>

  <distribution id="treeLikelihood.nd1_pos3" spec="TreeLikelihood" data="@nd1_pos3"
tree="@Tree.t:nd1_pos3" useAmbiguities="true">

    <siteModel id="SiteModel.s:nd1_pos3" spec="SiteModel">
      <parameter id="mutationRate.s:nd1_pos3" spec="parameter.RealParameter"
estimate="false" name="mutationRate">1.0</parameter>
      <parameter id="gammaShape.s:nd1_pos3" spec="parameter.RealParameter"
estimate="false" name="shape">1.0</parameter>
      <parameter id="proportionInvariant.s:nd1_pos3" spec="parameter.RealParameter"
estimate="false" lower="0.0" name="proportionInvariant" upper="1.0">0.0</parameter>
      <substModel id="JC69.s:nd1_pos3" spec="JukesCantor"/>
    </siteModel>

    <branchRateModel id="StrictClock.c:nd1_pos3"
spec="beast.evolution.branchratemodel.StrictClockModel"
clock.rate="@clockRate.c:nd1_pos3"/>

  </distribution>

  <distribution id="treeLikelihood.nd2_pos1" spec="TreeLikelihood" data="@nd2_pos1"
tree="@Tree.t:nd2_pos1" useAmbiguities="true">

    <siteModel id="SiteModel.s:nd2_pos1" spec="SiteModel">
      <parameter id="mutationRate.s:nd2_pos1" spec="parameter.RealParameter"
estimate="false" name="mutationRate">1.0</parameter>
      <parameter id="gammaShape.s:nd2_pos1" spec="parameter.RealParameter"
estimate="false" name="shape">1.0</parameter>
      <parameter id="proportionInvariant.s:nd2_pos1" spec="parameter.RealParameter"
estimate="false" lower="0.0" name="proportionInvariant" upper="1.0">0.0</parameter>

```

```

    <substModel id="JC69.s:nd2_pos1" spec="JukesCantor"/>

  </siteModel>

  <branchRateModel id="StrictClock.c:nd2_pos1"
spec="beast.evolution.branchratemodel.StrictClockModel"
clock.rate="@clockRate.c:nd2_pos1"/>

</distribution>

<distribution id="treeLikelihood.nd2_pos2" spec="TreeLikelihood" data="@nd2_pos2"
tree="@Tree.t:nd2_pos2" useAmbiguities="true">

  <siteModel id="SiteModel.s:nd2_pos2" spec="SiteModel">

    <parameter id="mutationRate.s:nd2_pos2" spec="parameter.RealParameter"
estimate="false" name="mutationRate">1.0</parameter>

    <parameter id="gammaShape.s:nd2_pos2" spec="parameter.RealParameter"
estimate="false" name="shape">1.0</parameter>

    <parameter id="proportionInvariant.s:nd2_pos2" spec="parameter.RealParameter"
estimate="false" lower="0.0" name="proportionInvariant" upper="1.0">0.0</parameter>

    <substModel id="JC69.s:nd2_pos2" spec="JukesCantor"/>

  </siteModel>

  <branchRateModel id="StrictClock.c:nd2_pos2"
spec="beast.evolution.branchratemodel.StrictClockModel"
clock.rate="@clockRate.c:nd2_pos2"/>

</distribution>

<distribution id="treeLikelihood.nd2_pos3" spec="TreeLikelihood" data="@nd2_pos3"
tree="@Tree.t:nd2_pos3" useAmbiguities="true">

  <siteModel id="SiteModel.s:nd2_pos3" spec="SiteModel">

    <parameter id="mutationRate.s:nd2_pos3" spec="parameter.RealParameter"
estimate="false" name="mutationRate">1.0</parameter>

    <parameter id="gammaShape.s:nd2_pos3" spec="parameter.RealParameter"
estimate="false" name="shape">1.0</parameter>

    <parameter id="proportionInvariant.s:nd2_pos3" spec="parameter.RealParameter"
estimate="false" lower="0.0" name="proportionInvariant" upper="1.0">0.0</parameter>

    <substModel id="JC69.s:nd2_pos3" spec="JukesCantor"/>

  </siteModel>

  <branchRateModel id="StrictClock.c:nd2_pos3"
spec="beast.evolution.branchratemodel.StrictClockModel"
clock.rate="@clockRate.c:nd2_pos3"/>

</distribution>

```

```

    <distribution id="treeLikelihood.nd3_pos1" spec="TreeLikelihood" data="@nd3_pos1"
tree="@Tree.t:nd3_pos1" useAmbiguities="true">

    <siteModel id="SiteModel.s:nd3_pos1" spec="SiteModel">

        <parameter id="mutationRate.s:nd3_pos1" spec="parameter.RealParameter"
estimate="false" name="mutationRate">1.0</parameter>

        <parameter id="gammaShape.s:nd3_pos1" spec="parameter.RealParameter"
estimate="false" name="shape">1.0</parameter>

        <parameter id="proportionInvariant.s:nd3_pos1" spec="parameter.RealParameter"
estimate="false" lower="0.0" name="proportionInvariant" upper="1.0">0.0</parameter>

        <substModel id="JC69.s:nd3_pos1" spec="JukesCantor"/>

    </siteModel>

    <branchRateModel id="StrictClock.c:nd3_pos1"
spec="beast.evolution.branchratemodel.StrictClockModel"
clock.rate="@clockRate.c:nd3_pos1"/>

</distribution>

    <distribution id="treeLikelihood.nd3_pos2" spec="TreeLikelihood" data="@nd3_pos2"
tree="@Tree.t:nd3_pos2" useAmbiguities="true">

    <siteModel id="SiteModel.s:nd3_pos2" spec="SiteModel">

        <parameter id="mutationRate.s:nd3_pos2" spec="parameter.RealParameter"
estimate="false" name="mutationRate">1.0</parameter>

        <parameter id="gammaShape.s:nd3_pos2" spec="parameter.RealParameter"
estimate="false" name="shape">1.0</parameter>

        <parameter id="proportionInvariant.s:nd3_pos2" spec="parameter.RealParameter"
estimate="false" lower="0.0" name="proportionInvariant" upper="1.0">0.0</parameter>

        <substModel id="JC69.s:nd3_pos2" spec="JukesCantor"/>

    </siteModel>

    <branchRateModel id="StrictClock.c:nd3_pos2"
spec="beast.evolution.branchratemodel.StrictClockModel"
clock.rate="@clockRate.c:nd3_pos2"/>

</distribution>

    <distribution id="treeLikelihood.nd3_pos3" spec="TreeLikelihood" data="@nd3_pos3"
tree="@Tree.t:nd3_pos3" useAmbiguities="true">

    <siteModel id="SiteModel.s:nd3_pos3" spec="SiteModel">

        <parameter id="mutationRate.s:nd3_pos3" spec="parameter.RealParameter"
estimate="false" name="mutationRate">1.0</parameter>

        <parameter id="gammaShape.s:nd3_pos3" spec="parameter.RealParameter"
estimate="false" name="shape">1.0</parameter>

```

```

        <parameter id="proportionInvariant.s:nd3_pos3" spec="parameter.RealParameter"
estimate="false" lower="0.0" name="proportionInvariant" upper="1.0">0.0</parameter>

        <substModel id="JC69.s:nd3_pos3" spec="JukesCantor"/>

    </siteModel>

    <branchRateModel id="StrictClock.c:nd3_pos3"
spec="beast.evolution.branchratemodel.StrictClockModel"
clock.rate="@clockRate.c:nd3_pos3"/>

</distribution>

    <distribution id="treeLikelihood.nd4_pos1" spec="TreeLikelihood" data="@nd4_pos1"
tree="@Tree.t:nd4_pos1" useAmbiguities="true">

        <siteModel id="SiteModel.s:nd4_pos1" spec="SiteModel">

            <parameter id="mutationRate.s:nd4_pos1" spec="parameter.RealParameter"
estimate="false" name="mutationRate">1.0</parameter>

            <parameter id="gammaShape.s:nd4_pos1" spec="parameter.RealParameter"
estimate="false" name="shape">1.0</parameter>

            <parameter id="proportionInvariant.s:nd4_pos1" spec="parameter.RealParameter"
estimate="false" lower="0.0" name="proportionInvariant" upper="1.0">0.0</parameter>

            <substModel id="JC69.s:nd4_pos1" spec="JukesCantor"/>

        </siteModel>

        <branchRateModel id="StrictClock.c:nd4_pos1"
spec="beast.evolution.branchratemodel.StrictClockModel"
clock.rate="@clockRate.c:nd4_pos1"/>

    </distribution>

    <distribution id="treeLikelihood.nd4_pos2" spec="TreeLikelihood" data="@nd4_pos2"
tree="@Tree.t:nd4_pos2" useAmbiguities="true">

        <siteModel id="SiteModel.s:nd4_pos2" spec="SiteModel">

            <parameter id="mutationRate.s:nd4_pos2" spec="parameter.RealParameter"
estimate="false" name="mutationRate">1.0</parameter>

            <parameter id="gammaShape.s:nd4_pos2" spec="parameter.RealParameter"
estimate="false" name="shape">1.0</parameter>

            <parameter id="proportionInvariant.s:nd4_pos2" spec="parameter.RealParameter"
estimate="false" lower="0.0" name="proportionInvariant" upper="1.0">0.0</parameter>

            <substModel id="JC69.s:nd4_pos2" spec="JukesCantor"/>

        </siteModel>

        <branchRateModel id="StrictClock.c:nd4_pos2"
spec="beast.evolution.branchratemodel.StrictClockModel"
clock.rate="@clockRate.c:nd4_pos2"/>

```



```

</distribution>

<distribution id="treeLikelihood.nd4_pos3" spec="TreeLikelihood" data="@nd4_pos3"
tree="@Tree.t:nd4_pos3" useAmbiguities="true">

  <siteModel id="SiteModel.s:nd4_pos3" spec="SiteModel">

    <parameter id="mutationRate.s:nd4_pos3" spec="parameter.RealParameter"
estimate="false" name="mutationRate">1.0</parameter>

    <parameter id="gammaShape.s:nd4_pos3" spec="parameter.RealParameter"
estimate="false" name="shape">1.0</parameter>

    <parameter id="proportionInvariant.s:nd4_pos3" spec="parameter.RealParameter"
estimate="false" lower="0.0" name="proportionInvariant" upper="1.0">0.0</parameter>

    <substModel id="JC69.s:nd4_pos3" spec="JukesCantor"/>

  </siteModel>

  <branchRateModel id="StrictClock.c:nd4_pos3"
spec="beast.evolution.branchratemodel.StrictClockModel"
clock.rate="@clockRate.c:nd4_pos3"/>

</distribution>

<distribution id="treeLikelihood.nd4L_pos1" spec="TreeLikelihood"
data="@nd4L_pos1" tree="@Tree.t:nd4L_pos1" useAmbiguities="true">

  <siteModel id="SiteModel.s:nd4L_pos1" spec="SiteModel">

    <parameter id="mutationRate.s:nd4L_pos1" spec="parameter.RealParameter"
estimate="false" name="mutationRate">1.0</parameter>

    <parameter id="gammaShape.s:nd4L_pos1" spec="parameter.RealParameter"
estimate="false" name="shape">1.0</parameter>

    <parameter id="proportionInvariant.s:nd4L_pos1" spec="parameter.RealParameter"
estimate="false" lower="0.0" name="proportionInvariant" upper="1.0">0.0</parameter>

    <substModel id="JC69.s:nd4L_pos1" spec="JukesCantor"/>

  </siteModel>

  <branchRateModel id="StrictClock.c:nd4L_pos1"
spec="beast.evolution.branchratemodel.StrictClockModel"
clock.rate="@clockRate.c:nd4L_pos1"/>

</distribution>

<distribution id="treeLikelihood.nd4L_pos2" spec="TreeLikelihood"
data="@nd4L_pos2" tree="@Tree.t:nd4L_pos2" useAmbiguities="true">

  <siteModel id="SiteModel.s:nd4L_pos2" spec="SiteModel">

    <parameter id="mutationRate.s:nd4L_pos2" spec="parameter.RealParameter"
estimate="false" name="mutationRate">1.0</parameter>

```

```

    <parameter id="gammaShape.s:nd4L_pos2" spec="parameter.RealParameter"
estimate="false" name="shape">1.0</parameter>

    <parameter id="proportionInvariant.s:nd4L_pos2" spec="parameter.RealParameter"
estimate="false" lower="0.0" name="proportionInvariant" upper="1.0">0.0</parameter>

    <substModel id="JC69.s:nd4L_pos2" spec="JukesCantor"/>

</siteModel>

    <branchRateModel id="StrictClock.c:nd4L_pos2"
spec="beast.evolution.branchratemodel.StrictClockModel"
clock.rate="@clockRate.c:nd4L_pos2"/>

</distribution>

    <distribution id="treeLikelihood.nd4L_pos3" spec="TreeLikelihood"
data="@nd4L_pos3" tree="@Tree.t:nd4L_pos3" useAmbiguities="true">

    <siteModel id="SiteModel.s:nd4L_pos3" spec="SiteModel">

        <parameter id="mutationRate.s:nd4L_pos3" spec="parameter.RealParameter"
estimate="false" name="mutationRate">1.0</parameter>

        <parameter id="gammaShape.s:nd4L_pos3" spec="parameter.RealParameter"
estimate="false" name="shape">1.0</parameter>

        <parameter id="proportionInvariant.s:nd4L_pos3" spec="parameter.RealParameter"
estimate="false" lower="0.0" name="proportionInvariant" upper="1.0">0.0</parameter>

        <substModel id="JC69.s:nd4L_pos3" spec="JukesCantor"/>

    </siteModel>

    <branchRateModel id="StrictClock.c:nd4L_pos3"
spec="beast.evolution.branchratemodel.StrictClockModel"
clock.rate="@clockRate.c:nd4L_pos3"/>

</distribution>

    <distribution id="treeLikelihood.nd5_pos1" spec="TreeLikelihood" data="@nd5_pos1"
tree="@Tree.t:nd5_pos1" useAmbiguities="true">

    <siteModel id="SiteModel.s:nd5_pos1" spec="SiteModel">

        <parameter id="mutationRate.s:nd5_pos1" spec="parameter.RealParameter"
estimate="false" name="mutationRate">1.0</parameter>

        <parameter id="gammaShape.s:nd5_pos1" spec="parameter.RealParameter"
estimate="false" name="shape">1.0</parameter>

        <parameter id="proportionInvariant.s:nd5_pos1" spec="parameter.RealParameter"
estimate="false" lower="0.0" name="proportionInvariant" upper="1.0">0.0</parameter>

        <substModel id="JC69.s:nd5_pos1" spec="JukesCantor"/>

    </siteModel>

```

```

    <branchRateModel id="StrictClock.c:nd5_pos1"
spec="beast.evolution.branchratemodel.StrictClockModel"
clock.rate="@clockRate.c:nd5_pos1"/>

</distribution>

<distribution id="treeLikelihood.nd5_pos2" spec="TreeLikelihood" data="@nd5_pos2"
tree="@Tree.t:nd5_pos2" useAmbiguities="true">

    <siteModel id="SiteModel.s:nd5_pos2" spec="SiteModel">

        <parameter id="mutationRate.s:nd5_pos2" spec="parameter.RealParameter"
estimate="false" name="mutationRate">1.0</parameter>

        <parameter id="gammaShape.s:nd5_pos2" spec="parameter.RealParameter"
estimate="false" name="shape">1.0</parameter>

        <parameter id="proportionInvariant.s:nd5_pos2" spec="parameter.RealParameter"
estimate="false" lower="0.0" name="proportionInvariant" upper="1.0">0.0</parameter>

        <substModel id="JC69.s:nd5_pos2" spec="JukesCantor"/>

    </siteModel>

    <branchRateModel id="StrictClock.c:nd5_pos2"
spec="beast.evolution.branchratemodel.StrictClockModel"
clock.rate="@clockRate.c:nd5_pos2"/>

</distribution>

<distribution id="treeLikelihood.nd5_pos3" spec="TreeLikelihood" data="@nd5_pos3"
tree="@Tree.t:nd5_pos3" useAmbiguities="true">

    <siteModel id="SiteModel.s:nd5_pos3" spec="SiteModel">

        <parameter id="mutationRate.s:nd5_pos3" spec="parameter.RealParameter"
estimate="false" name="mutationRate">1.0</parameter>

        <parameter id="gammaShape.s:nd5_pos3" spec="parameter.RealParameter"
estimate="false" name="shape">1.0</parameter>

        <parameter id="proportionInvariant.s:nd5_pos3" spec="parameter.RealParameter"
estimate="false" lower="0.0" name="proportionInvariant" upper="1.0">0.0</parameter>

        <substModel id="JC69.s:nd5_pos3" spec="JukesCantor"/>

    </siteModel>

    <branchRateModel id="StrictClock.c:nd5_pos3"
spec="beast.evolution.branchratemodel.StrictClockModel"
clock.rate="@clockRate.c:nd5_pos3"/>

</distribution>

<distribution id="treeLikelihood.nd6_pos1" spec="TreeLikelihood" data="@nd6_pos1"
tree="@Tree.t:nd6_pos1" useAmbiguities="true">

    <siteModel id="SiteModel.s:nd6_pos1" spec="SiteModel">

```

```

    <parameter id="mutationRate.s:nd6_pos1" spec="parameter.RealParameter"
estimate="false" name="mutationRate">1.0</parameter>

    <parameter id="gammaShape.s:nd6_pos1" spec="parameter.RealParameter"
estimate="false" name="shape">1.0</parameter>

    <parameter id="proportionInvariant.s:nd6_pos1" spec="parameter.RealParameter"
estimate="false" lower="0.0" name="proportionInvariant" upper="1.0">0.0</parameter>

    <substModel id="JC69.s:nd6_pos1" spec="JukesCantor"/>

</siteModel>

    <branchRateModel id="StrictClock.c:nd6_pos1"
spec="beast.evolution.branchratemodel.StrictClockModel"
clock.rate="@clockRate.c:nd6_pos1"/>

</distribution>

    <distribution id="treeLikelihood.nd6_pos2" spec="TreeLikelihood" data="@nd6_pos2"
tree="@Tree.t:nd6_pos2" useAmbiguities="true">

    <siteModel id="SiteModel.s:nd6_pos2" spec="SiteModel">

        <parameter id="mutationRate.s:nd6_pos2" spec="parameter.RealParameter"
estimate="false" name="mutationRate">1.0</parameter>

        <parameter id="gammaShape.s:nd6_pos2" spec="parameter.RealParameter"
estimate="false" name="shape">1.0</parameter>

        <parameter id="proportionInvariant.s:nd6_pos2" spec="parameter.RealParameter"
estimate="false" lower="0.0" name="proportionInvariant" upper="1.0">0.0</parameter>

        <substModel id="JC69.s:nd6_pos2" spec="JukesCantor"/>

    </siteModel>

    <branchRateModel id="StrictClock.c:nd6_pos2"
spec="beast.evolution.branchratemodel.StrictClockModel"
clock.rate="@clockRate.c:nd6_pos2"/>

</distribution>

    <distribution id="treeLikelihood.nd6_pos3" spec="TreeLikelihood" data="@nd6_pos3"
tree="@Tree.t:nd6_pos3" useAmbiguities="true">

    <siteModel id="SiteModel.s:nd6_pos3" spec="SiteModel">

        <parameter id="mutationRate.s:nd6_pos3" spec="parameter.RealParameter"
estimate="false" name="mutationRate">1.0</parameter>

        <parameter id="gammaShape.s:nd6_pos3" spec="parameter.RealParameter"
estimate="false" name="shape">1.0</parameter>

        <parameter id="proportionInvariant.s:nd6_pos3" spec="parameter.RealParameter"
estimate="false" lower="0.0" name="proportionInvariant" upper="1.0">0.0</parameter>

        <substModel id="JC69.s:nd6_pos3" spec="JukesCantor"/>

```

```

</siteModel>

<branchRateModel id="StrictClock.c:nd6_pos3"
spec="beast.evolution.branchratemodel.StrictClockModel"
clock.rate="@clockRate.c:nd6_pos3"/>

</distribution>

<distribution id="treeLikelihood.Fl26seq-pt8-11401-123ps4" spec="TreeLikelihood"
data="@Fl26seq-pt8-11401-123ps4" tree="@Tree.t:Fl26seq-pt8-11401-123ps4"
useAmbiguities="true">

<siteModel id="SiteModel.s:Fl26seq-pt8-11401-123ps4" spec="SiteModel">

<parameter id="mutationRate.s:Fl26seq-pt8-11401-123ps4"
spec="parameter.RealParameter" estimate="false" name="mutationRate">1.0</parameter>

<parameter id="gammaShape.s:Fl26seq-pt8-11401-123ps4"
spec="parameter.RealParameter" estimate="false" name="shape">1.0</parameter>

<parameter id="proportionInvariant.s:Fl26seq-pt8-11401-123ps4"
spec="parameter.RealParameter" estimate="false" lower="0.0" name="proportionInvariant"
upper="1.0">0.0</parameter>

<substModel id="JC69.s:Fl26seq-pt8-11401-123ps4" spec="JukesCantor"/>

</siteModel>

<branchRateModel id="StrictClock.c:Fl26seq-pt8-11401-123ps4"
spec="beast.evolution.branchratemodel.StrictClockModel" clock.rate="@clockRate.c:Fl26seq-
pt8-11401-123ps4"/>

</distribution>

</distribution>

</distribution>

<operator id="StrictClockRateScaler.c:nd4_pos3" spec="ScaleOperator"
parameter="@clockRate.c:nd4_pos3" weight="3.0"/>

<operator id="treeScaler.t:nd4_pos3" spec="ScaleOperator" scaleFactor="0.5"
tree="@Tree.t:nd4_pos3" weight="3.0"/>

<operator id="treeRootScaler.t:nd4_pos3" spec="ScaleOperator" rootOnly="true"
scaleFactor="0.5" tree="@Tree.t:nd4_pos3" weight="3.0"/>

<operator id="UniformOperator.t:nd4_pos3" spec="Uniform" tree="@Tree.t:nd4_pos3"
weight="30.0"/>

```

<operator id="SubtreeSlide.t:nd4\_pos3" spec="SubtreeSlide" tree="@Tree.t:nd4\_pos3"  
weight="15.0"/>

<operator id="narrow.t:nd4\_pos3" spec="Exchange" tree="@Tree.t:nd4\_pos3"  
weight="15.0"/>

<operator id="wide.t:nd4\_pos3" spec="Exchange" isNarrow="false"  
tree="@Tree.t:nd4\_pos3" weight="3.0"/>

<operator id="WilsonBalding.t:nd4\_pos3" spec="WilsonBalding" tree="@Tree.t:nd4\_pos3"  
weight="3.0"/>

<operator id="strictClockUpDownOperator.c:nd4\_pos3" spec="UpDownOperator"  
scaleFactor="0.75" weight="3.0">

<up idref="clockRate.c:nd4\_pos3"/>

<down idref="Tree.t:nd4\_pos3"/>

</operator>

<operator id="treeScaler.t:atp6\_pos1" spec="ScaleOperator" scaleFactor="0.5"  
tree="@Tree.t:atp6\_pos1" weight="3.0"/>

<operator id="treeRootScaler.t:atp6\_pos1" spec="ScaleOperator" rootOnly="true"  
scaleFactor="0.5" tree="@Tree.t:atp6\_pos1" weight="3.0"/>

<operator id="UniformOperator.t:atp6\_pos1" spec="Uniform" tree="@Tree.t:atp6\_pos1"  
weight="30.0"/>

<operator id="SubtreeSlide.t:atp6\_pos1" spec="SubtreeSlide" tree="@Tree.t:atp6\_pos1"  
weight="15.0"/>

<operator id="narrow.t:atp6\_pos1" spec="Exchange" tree="@Tree.t:atp6\_pos1"  
weight="15.0"/>

<operator id="wide.t:atp6\_pos1" spec="Exchange" isNarrow="false"  
tree="@Tree.t:atp6\_pos1" weight="3.0"/>

<operator id="WilsonBalding.t:atp6\_pos1" spec="WilsonBalding" tree="@Tree.t:atp6\_pos1" weight="3.0"/>

<operator id="StrictClockRateScaler.c:atp8\_pos2" spec="ScaleOperator" parameter="@clockRate.c:atp8\_pos2" weight="3.0"/>

<operator id="treeScaler.t:atp8\_pos2" spec="ScaleOperator" scaleFactor="0.5" tree="@Tree.t:atp8\_pos2" weight="3.0"/>

<operator id="treeRootScaler.t:atp8\_pos2" spec="ScaleOperator" rootOnly="true" scaleFactor="0.5" tree="@Tree.t:atp8\_pos2" weight="3.0"/>

<operator id="UniformOperator.t:atp8\_pos2" spec="Uniform" tree="@Tree.t:atp8\_pos2" weight="30.0"/>

<operator id="SubtreeSlide.t:atp8\_pos2" spec="SubtreeSlide" tree="@Tree.t:atp8\_pos2" weight="15.0"/>

<operator id="narrow.t:atp8\_pos2" spec="Exchange" tree="@Tree.t:atp8\_pos2" weight="15.0"/>

<operator id="wide.t:atp8\_pos2" spec="Exchange" isNarrow="false" tree="@Tree.t:atp8\_pos2" weight="3.0"/>

<operator id="WilsonBalding.t:atp8\_pos2" spec="WilsonBalding" tree="@Tree.t:atp8\_pos2" weight="3.0"/>

<operator id="strictClockUpDownOperator.c:atp8\_pos2" spec="UpDownOperator" scaleFactor="0.75" weight="3.0">

<up idref="clockRate.c:atp8\_pos2"/>

<down idref="Tree.t:atp8\_pos2"/>

</operator>

<operator id="StrictClockRateScaler.c:nd4L\_pos3" spec="ScaleOperator" parameter="@clockRate.c:nd4L\_pos3" weight="3.0"/>

<operator id="treeScaler.t:nd4L\_pos3" spec="ScaleOperator" scaleFactor="0.5"  
tree="@Tree.t:nd4L\_pos3" weight="3.0"/>

<operator id="treeRootScaler.t:nd4L\_pos3" spec="ScaleOperator" rootOnly="true"  
scaleFactor="0.5" tree="@Tree.t:nd4L\_pos3" weight="3.0"/>

<operator id="UniformOperator.t:nd4L\_pos3" spec="Uniform" tree="@Tree.t:nd4L\_pos3"  
weight="30.0"/>

<operator id="SubtreeSlide.t:nd4L\_pos3" spec="SubtreeSlide" tree="@Tree.t:nd4L\_pos3"  
weight="15.0"/>

<operator id="narrow.t:nd4L\_pos3" spec="Exchange" tree="@Tree.t:nd4L\_pos3"  
weight="15.0"/>

<operator id="wide.t:nd4L\_pos3" spec="Exchange" isNarrow="false"  
tree="@Tree.t:nd4L\_pos3" weight="3.0"/>

<operator id="WilsonBalding.t:nd4L\_pos3" spec="WilsonBalding"  
tree="@Tree.t:nd4L\_pos3" weight="3.0"/>

<operator id="strictClockUpDownOperator.c:nd4L\_pos3" spec="UpDownOperator"  
scaleFactor="0.75" weight="3.0">

<up idref="clockRate.c:nd4L\_pos3"/>

<down idref="Tree.t:nd4L\_pos3"/>

</operator>

<operator id="StrictClockRateScaler.c:coi\_pos3" spec="ScaleOperator"  
parameter="@clockRate.c:coi\_pos3" weight="3.0"/>

<operator id="treeScaler.t:coi\_pos3" spec="ScaleOperator" scaleFactor="0.5"  
tree="@Tree.t:coi\_pos3" weight="3.0"/>

<operator id="treeRootScaler.t:coi\_pos3" spec="ScaleOperator" rootOnly="true"  
scaleFactor="0.5" tree="@Tree.t:coi\_pos3" weight="3.0"/>



```
<operator id="UniformOperator.t:coi_pos3" spec="Uniform" tree="@Tree.t:coi_pos3"
weight="30.0"/>
```

```
<operator id="SubtreeSlide.t:coi_pos3" spec="SubtreeSlide" tree="@Tree.t:coi_pos3"
weight="15.0"/>
```

```
<operator id="narrow.t:coi_pos3" spec="Exchange" tree="@Tree.t:coi_pos3"
weight="15.0"/>
```

```
<operator id="wide.t:coi_pos3" spec="Exchange" isNarrow="false" tree="@Tree.t:coi_pos3"
weight="3.0"/>
```

```
<operator id="WilsonBalding.t:coi_pos3" spec="WilsonBalding" tree="@Tree.t:coi_pos3"
weight="3.0"/>
```

```
<operator id="strictClockUpDownOperator.c:coi_pos3" spec="UpDownOperator"
scaleFactor="0.75" weight="3.0">
```

```
<up idref="clockRate.c:coi_pos3"/>
```

```
<down idref="Tree.t:coi_pos3"/>
```

```
</operator>
```

```
<operator id="StrictClockRateScaler.c:nd2_pos3" spec="ScaleOperator"
parameter="@clockRate.c:nd2_pos3" weight="3.0"/>
```

```
<operator id="treeScaler.t:nd2_pos3" spec="ScaleOperator" scaleFactor="0.5"
tree="@Tree.t:nd2_pos3" weight="3.0"/>
```

```
<operator id="treeRootScaler.t:nd2_pos3" spec="ScaleOperator" rootOnly="true"
scaleFactor="0.5" tree="@Tree.t:nd2_pos3" weight="3.0"/>
```

```
<operator id="UniformOperator.t:nd2_pos3" spec="Uniform" tree="@Tree.t:nd2_pos3"
weight="30.0"/>
```

```
<operator id="SubtreeSlide.t:nd2_pos3" spec="SubtreeSlide" tree="@Tree.t:nd2_pos3"
weight="15.0"/>
```

<operator id="narrow.t:nd2\_pos3" spec="Exchange" tree="@Tree.t:nd2\_pos3"  
weight="15.0"/>

<operator id="wide.t:nd2\_pos3" spec="Exchange" isNarrow="false"  
tree="@Tree.t:nd2\_pos3" weight="3.0"/>

<operator id="WilsonBalding.t:nd2\_pos3" spec="WilsonBalding" tree="@Tree.t:nd2\_pos3"  
weight="3.0"/>

<operator id="strictClockUpDownOperator.c:nd2\_pos3" spec="UpDownOperator"  
scaleFactor="0.75" weight="3.0">

<up idref="clockRate.c:nd2\_pos3"/>

<down idref="Tree.t:nd2\_pos3"/>

</operator>

<operator id="StrictClockRateScaler.c:coiii\_pos2" spec="ScaleOperator"  
parameter="@clockRate.c:coiii\_pos2" weight="3.0"/>

<operator id="treeScaler.t:coiii\_pos2" spec="ScaleOperator" scaleFactor="0.5"  
tree="@Tree.t:coiii\_pos2" weight="3.0"/>

<operator id="treeRootScaler.t:coiii\_pos2" spec="ScaleOperator" rootOnly="true"  
scaleFactor="0.5" tree="@Tree.t:coiii\_pos2" weight="3.0"/>

<operator id="UniformOperator.t:coiii\_pos2" spec="Uniform" tree="@Tree.t:coiii\_pos2"  
weight="30.0"/>

<operator id="SubtreeSlide.t:coiii\_pos2" spec="SubtreeSlide" tree="@Tree.t:coiii\_pos2"  
weight="15.0"/>

<operator id="narrow.t:coiii\_pos2" spec="Exchange" tree="@Tree.t:coiii\_pos2"  
weight="15.0"/>

<operator id="wide.t:coiii\_pos2" spec="Exchange" isNarrow="false"  
tree="@Tree.t:coiii\_pos2" weight="3.0"/>

<operator id="WilsonBalding.t:coiii\_pos2" spec="WilsonBalding" tree="@Tree.t:coiii\_pos2" weight="3.0"/>

<operator id="strictClockUpDownOperator.c:coiii\_pos2" spec="UpDownOperator" scaleFactor="0.75" weight="3.0">

<up idref="clockRate.c:coiii\_pos2"/>

<down idref="Tree.t:coiii\_pos2"/>

</operator>

<operator id="StrictClockRateScaler.c:nd6\_pos3" spec="ScaleOperator" parameter="@clockRate.c:nd6\_pos3" weight="3.0"/>

<operator id="treeScaler.t:nd6\_pos3" spec="ScaleOperator" scaleFactor="0.5" tree="@Tree.t:nd6\_pos3" weight="3.0"/>

<operator id="treeRootScaler.t:nd6\_pos3" spec="ScaleOperator" rootOnly="true" scaleFactor="0.5" tree="@Tree.t:nd6\_pos3" weight="3.0"/>

<operator id="UniformOperator.t:nd6\_pos3" spec="Uniform" tree="@Tree.t:nd6\_pos3" weight="30.0"/>

<operator id="SubtreeSlide.t:nd6\_pos3" spec="SubtreeSlide" tree="@Tree.t:nd6\_pos3" weight="15.0"/>

<operator id="narrow.t:nd6\_pos3" spec="Exchange" tree="@Tree.t:nd6\_pos3" weight="15.0"/>

<operator id="wide.t:nd6\_pos3" spec="Exchange" isNarrow="false" tree="@Tree.t:nd6\_pos3" weight="3.0"/>

<operator id="WilsonBalding.t:nd6\_pos3" spec="WilsonBalding" tree="@Tree.t:nd6\_pos3" weight="3.0"/>

<operator id="strictClockUpDownOperator.c:nd6\_pos3" spec="UpDownOperator" scaleFactor="0.75" weight="3.0">

<up idref="clockRate.c:nd6\_pos3"/>

```

    <down idref="Tree.t:nd6_pos3"/>

</operator>

<operator id="StrictClockRateScaler.c:nd1_pos3" spec="ScaleOperator"
parameter="@clockRate.c:nd1_pos3" weight="3.0"/>

<operator id="treeScaler.t:nd1_pos3" spec="ScaleOperator" scaleFactor="0.5"
tree="@Tree.t:nd1_pos3" weight="3.0"/>

<operator id="treeRootScaler.t:nd1_pos3" spec="ScaleOperator" rootOnly="true"
scaleFactor="0.5" tree="@Tree.t:nd1_pos3" weight="3.0"/>

<operator id="UniformOperator.t:nd1_pos3" spec="Uniform" tree="@Tree.t:nd1_pos3"
weight="30.0"/>

<operator id="SubtreeSlide.t:nd1_pos3" spec="SubtreeSlide" tree="@Tree.t:nd1_pos3"
weight="15.0"/>

<operator id="narrow.t:nd1_pos3" spec="Exchange" tree="@Tree.t:nd1_pos3"
weight="15.0"/>

<operator id="wide.t:nd1_pos3" spec="Exchange" isNarrow="false"
tree="@Tree.t:nd1_pos3" weight="3.0"/>

<operator id="WilsonBalding.t:nd1_pos3" spec="WilsonBalding" tree="@Tree.t:nd1_pos3"
weight="3.0"/>

<operator id="strictClockUpDownOperator.c:nd1_pos3" spec="UpDownOperator"
scaleFactor="0.75" weight="3.0">
    <up idref="clockRate.c:nd1_pos3"/>
    <down idref="Tree.t:nd1_pos3"/>
</operator>

<operator id="StrictClockRateScaler.c:coii_pos3" spec="ScaleOperator"
parameter="@clockRate.c:coii_pos3" weight="3.0"/>

```

```
<operator id="treeScaler.t:coii_pos3" spec="ScaleOperator" scaleFactor="0.5"
tree="@Tree.t:coii_pos3" weight="3.0"/>
```

```
<operator id="treeRootScaler.t:coii_pos3" spec="ScaleOperator" rootOnly="true"
scaleFactor="0.5" tree="@Tree.t:coii_pos3" weight="3.0"/>
```

```
<operator id="UniformOperator.t:coii_pos3" spec="Uniform" tree="@Tree.t:coii_pos3"
weight="30.0"/>
```

```
<operator id="SubtreeSlide.t:coii_pos3" spec="SubtreeSlide" tree="@Tree.t:coii_pos3"
weight="15.0"/>
```

```
<operator id="narrow.t:coii_pos3" spec="Exchange" tree="@Tree.t:coii_pos3"
weight="15.0"/>
```

```
<operator id="wide.t:coii_pos3" spec="Exchange" isNarrow="false"
tree="@Tree.t:coii_pos3" weight="3.0"/>
```

```
<operator id="WilsonBalding.t:coii_pos3" spec="WilsonBalding" tree="@Tree.t:coii_pos3"
weight="3.0"/>
```

```
<operator id="strictClockUpDownOperator.c:coii_pos3" spec="UpDownOperator"
scaleFactor="0.75" weight="3.0">
```

```
<up idref="clockRate.c:coii_pos3"/>
```

```
<down idref="Tree.t:coii_pos3"/>
```

```
</operator>
```

```
<operator id="StrictClockRateScaler.c:nd2_pos2" spec="ScaleOperator"
parameter="@clockRate.c:nd2_pos2" weight="3.0"/>
```

```
<operator id="treeScaler.t:nd2_pos2" spec="ScaleOperator" scaleFactor="0.5"
tree="@Tree.t:nd2_pos2" weight="3.0"/>
```

```
<operator id="treeRootScaler.t:nd2_pos2" spec="ScaleOperator" rootOnly="true"
scaleFactor="0.5" tree="@Tree.t:nd2_pos2" weight="3.0"/>
```

<operator id="UniformOperator.t:nd2\_pos2" spec="Uniform" tree="@Tree.t:nd2\_pos2"  
weight="30.0"/>

<operator id="SubtreeSlide.t:nd2\_pos2" spec="SubtreeSlide" tree="@Tree.t:nd2\_pos2"  
weight="15.0"/>

<operator id="narrow.t:nd2\_pos2" spec="Exchange" tree="@Tree.t:nd2\_pos2"  
weight="15.0"/>

<operator id="wide.t:nd2\_pos2" spec="Exchange" isNarrow="false"  
tree="@Tree.t:nd2\_pos2" weight="3.0"/>

<operator id="WilsonBalding.t:nd2\_pos2" spec="WilsonBalding" tree="@Tree.t:nd2\_pos2"  
weight="3.0"/>

<operator id="strictClockUpDownOperator.c:nd2\_pos2" spec="UpDownOperator"  
scaleFactor="0.75" weight="3.0">

<up idref="clockRate.c:nd2\_pos2"/>

<down idref="Tree.t:nd2\_pos2"/>

</operator>

<operator id="StrictClockRateScaler.c:nd4L\_pos1" spec="ScaleOperator"  
parameter="@clockRate.c:nd4L\_pos1" weight="3.0"/>

<operator id="treeScaler.t:nd4L\_pos1" spec="ScaleOperator" scaleFactor="0.5"  
tree="@Tree.t:nd4L\_pos1" weight="3.0"/>

<operator id="treeRootScaler.t:nd4L\_pos1" spec="ScaleOperator" rootOnly="true"  
scaleFactor="0.5" tree="@Tree.t:nd4L\_pos1" weight="3.0"/>

<operator id="UniformOperator.t:nd4L\_pos1" spec="Uniform" tree="@Tree.t:nd4L\_pos1"  
weight="30.0"/>

<operator id="SubtreeSlide.t:nd4L\_pos1" spec="SubtreeSlide" tree="@Tree.t:nd4L\_pos1"  
weight="15.0"/>

```
<operator id="narrow.t:nd4L_pos1" spec="Exchange" tree="@Tree.t:nd4L_pos1"
weight="15.0"/>
```

```
<operator id="wide.t:nd4L_pos1" spec="Exchange" isNarrow="false"
tree="@Tree.t:nd4L_pos1" weight="3.0"/>
```

```
<operator id="WilsonBalding.t:nd4L_pos1" spec="WilsonBalding"
tree="@Tree.t:nd4L_pos1" weight="3.0"/>
```

```
<operator id="strictClockUpDownOperator.c:nd4L_pos1" spec="UpDownOperator"
scaleFactor="0.75" weight="3.0">
```

```
<up idref="clockRate.c:nd4L_pos1"/>
```

```
<down idref="Tree.t:nd4L_pos1"/>
```

```
</operator>
```

```
<operator id="StrictClockRateScaler.c:coi_pos2" spec="ScaleOperator"
parameter="@clockRate.c:coi_pos2" weight="3.0"/>
```

```
<operator id="treeScaler.t:coi_pos2" spec="ScaleOperator" scaleFactor="0.5"
tree="@Tree.t:coi_pos2" weight="3.0"/>
```

```
<operator id="treeRootScaler.t:coi_pos2" spec="ScaleOperator" rootOnly="true"
scaleFactor="0.5" tree="@Tree.t:coi_pos2" weight="3.0"/>
```

```
<operator id="UniformOperator.t:coi_pos2" spec="Uniform" tree="@Tree.t:coi_pos2"
weight="30.0"/>
```

```
<operator id="SubtreeSlide.t:coi_pos2" spec="SubtreeSlide" tree="@Tree.t:coi_pos2"
weight="15.0"/>
```

```
<operator id="narrow.t:coi_pos2" spec="Exchange" tree="@Tree.t:coi_pos2"
weight="15.0"/>
```

```
<operator id="wide.t:coi_pos2" spec="Exchange" isNarrow="false" tree="@Tree.t:coi_pos2"
weight="3.0"/>
```

<operator id="WilsonBalding.t:coi\_pos2" spec="WilsonBalding" tree="@Tree.t:coi\_pos2" weight="3.0"/>

<operator id="strictClockUpDownOperator.c:coi\_pos2" spec="UpDownOperator" scaleFactor="0.75" weight="3.0">

<up idref="clockRate.c:coi\_pos2"/>

<down idref="Tree.t:coi\_pos2"/>

</operator>

<operator id="StrictClockRateScaler.c:coii\_pos2" spec="ScaleOperator" parameter="@clockRate.c:coii\_pos2" weight="3.0"/>

<operator id="treeScaler.t:coii\_pos2" spec="ScaleOperator" scaleFactor="0.5" tree="@Tree.t:coii\_pos2" weight="3.0"/>

<operator id="treeRootScaler.t:coii\_pos2" spec="ScaleOperator" rootOnly="true" scaleFactor="0.5" tree="@Tree.t:coii\_pos2" weight="3.0"/>

<operator id="UniformOperator.t:coii\_pos2" spec="Uniform" tree="@Tree.t:coii\_pos2" weight="30.0"/>

<operator id="SubtreeSlide.t:coii\_pos2" spec="SubtreeSlide" tree="@Tree.t:coii\_pos2" weight="15.0"/>

<operator id="narrow.t:coii\_pos2" spec="Exchange" tree="@Tree.t:coii\_pos2" weight="15.0"/>

<operator id="wide.t:coii\_pos2" spec="Exchange" isNarrow="false" tree="@Tree.t:coii\_pos2" weight="3.0"/>

<operator id="WilsonBalding.t:coii\_pos2" spec="WilsonBalding" tree="@Tree.t:coii\_pos2" weight="3.0"/>

<operator id="strictClockUpDownOperator.c:coii\_pos2" spec="UpDownOperator" scaleFactor="0.75" weight="3.0">



```

    <up idref="clockRate.c:coii_pos2"/>

    <down idref="Tree.t:coii_pos2"/>

</operator>

<operator id="StrictClockRateScaler.c:coii_pos1" spec="ScaleOperator"
parameter="@clockRate.c:coii_pos1" weight="3.0"/>

<operator id="treeScaler.t:coii_pos1" spec="ScaleOperator" scaleFactor="0.5"
tree="@Tree.t:coii_pos1" weight="3.0"/>

<operator id="treeRootScaler.t:coii_pos1" spec="ScaleOperator" rootOnly="true"
scaleFactor="0.5" tree="@Tree.t:coii_pos1" weight="3.0"/>

<operator id="UniformOperator.t:coii_pos1" spec="Uniform" tree="@Tree.t:coii_pos1"
weight="30.0"/>

<operator id="SubtreeSlide.t:coii_pos1" spec="SubtreeSlide" tree="@Tree.t:coii_pos1"
weight="15.0"/>

<operator id="narrow.t:coii_pos1" spec="Exchange" tree="@Tree.t:coii_pos1"
weight="15.0"/>

<operator id="wide.t:coii_pos1" spec="Exchange" isNarrow="false"
tree="@Tree.t:coii_pos1" weight="3.0"/>

<operator id="WilsonBalding.t:coii_pos1" spec="WilsonBalding" tree="@Tree.t:coii_pos1"
weight="3.0"/>

<operator id="strictClockUpDownOperator.c:coii_pos1" spec="UpDownOperator"
scaleFactor="0.75" weight="3.0">

    <up idref="clockRate.c:coii_pos1"/>

    <down idref="Tree.t:coii_pos1"/>

</operator>

```

<operator id="StrictClockRateScaler.c:nd1\_pos1" spec="ScaleOperator"  
parameter="@clockRate.c:nd1\_pos1" weight="3.0"/>

<operator id="treeScaler.t:nd1\_pos1" spec="ScaleOperator" scaleFactor="0.5"  
tree="@Tree.t:nd1\_pos1" weight="3.0"/>

<operator id="treeRootScaler.t:nd1\_pos1" spec="ScaleOperator" rootOnly="true"  
scaleFactor="0.5" tree="@Tree.t:nd1\_pos1" weight="3.0"/>

<operator id="UniformOperator.t:nd1\_pos1" spec="Uniform" tree="@Tree.t:nd1\_pos1"  
weight="30.0"/>

<operator id="SubtreeSlide.t:nd1\_pos1" spec="SubtreeSlide" tree="@Tree.t:nd1\_pos1"  
weight="15.0"/>

<operator id="narrow.t:nd1\_pos1" spec="Exchange" tree="@Tree.t:nd1\_pos1"  
weight="15.0"/>

<operator id="wide.t:nd1\_pos1" spec="Exchange" isNarrow="false"  
tree="@Tree.t:nd1\_pos1" weight="3.0"/>

<operator id="WilsonBalding.t:nd1\_pos1" spec="WilsonBalding" tree="@Tree.t:nd1\_pos1"  
weight="3.0"/>

<operator id="strictClockUpDownOperator.c:nd1\_pos1" spec="UpDownOperator"  
scaleFactor="0.75" weight="3.0">

<up idref="clockRate.c:nd1\_pos1"/>

<down idref="Tree.t:nd1\_pos1"/>

</operator>

<operator id="StrictClockRateScaler.c:nd4\_pos1" spec="ScaleOperator"  
parameter="@clockRate.c:nd4\_pos1" weight="3.0"/>

<operator id="treeScaler.t:nd4\_pos1" spec="ScaleOperator" scaleFactor="0.5"  
tree="@Tree.t:nd4\_pos1" weight="3.0"/>

```
<operator id="treeRootScaler.t:nd4_pos1" spec="ScaleOperator" rootOnly="true"
scaleFactor="0.5" tree="@Tree.t:nd4_pos1" weight="3.0"/>
```

```
<operator id="UniformOperator.t:nd4_pos1" spec="Uniform" tree="@Tree.t:nd4_pos1"
weight="30.0"/>
```

```
<operator id="SubtreeSlide.t:nd4_pos1" spec="SubtreeSlide" tree="@Tree.t:nd4_pos1"
weight="15.0"/>
```

```
<operator id="narrow.t:nd4_pos1" spec="Exchange" tree="@Tree.t:nd4_pos1"
weight="15.0"/>
```

```
<operator id="wide.t:nd4_pos1" spec="Exchange" isNarrow="false"
tree="@Tree.t:nd4_pos1" weight="3.0"/>
```

```
<operator id="WilsonBalding.t:nd4_pos1" spec="WilsonBalding" tree="@Tree.t:nd4_pos1"
weight="3.0"/>
```

```
<operator id="strictClockUpDownOperator.c:nd4_pos1" spec="UpDownOperator"
scaleFactor="0.75" weight="3.0">
```

```
<up idref="clockRate.c:nd4_pos1"/>
```

```
<down idref="Tree.t:nd4_pos1"/>
```

```
</operator>
```

```
<operator id="StrictClockRateScaler.c:nd5_pos1" spec="ScaleOperator"
parameter="@clockRate.c:nd5_pos1" weight="3.0"/>
```

```
<operator id="treeScaler.t:nd5_pos1" spec="ScaleOperator" scaleFactor="0.5"
tree="@Tree.t:nd5_pos1" weight="3.0"/>
```

```
<operator id="treeRootScaler.t:nd5_pos1" spec="ScaleOperator" rootOnly="true"
scaleFactor="0.5" tree="@Tree.t:nd5_pos1" weight="3.0"/>
```

```
<operator id="UniformOperator.t:nd5_pos1" spec="Uniform" tree="@Tree.t:nd5_pos1"
weight="30.0"/>
```

<operator id="SubtreeSlide.t:nd5\_pos1" spec="SubtreeSlide" tree="@Tree.t:nd5\_pos1"  
weight="15.0"/>

<operator id="narrow.t:nd5\_pos1" spec="Exchange" tree="@Tree.t:nd5\_pos1"  
weight="15.0"/>

<operator id="wide.t:nd5\_pos1" spec="Exchange" isNarrow="false"  
tree="@Tree.t:nd5\_pos1" weight="3.0"/>

<operator id="WilsonBalding.t:nd5\_pos1" spec="WilsonBalding" tree="@Tree.t:nd5\_pos1"  
weight="3.0"/>

<operator id="strictClockUpDownOperator.c:nd5\_pos1" spec="UpDownOperator"  
scaleFactor="0.75" weight="3.0">

<up idref="clockRate.c:nd5\_pos1"/>

<down idref="Tree.t:nd5\_pos1"/>

</operator>

<operator id="StrictClockRateScaler.c:atp6\_pos2" spec="ScaleOperator"  
parameter="@clockRate.c:atp6\_pos2" weight="3.0"/>

<operator id="treeScaler.t:atp6\_pos2" spec="ScaleOperator" scaleFactor="0.5"  
tree="@Tree.t:atp6\_pos2" weight="3.0"/>

<operator id="treeRootScaler.t:atp6\_pos2" spec="ScaleOperator" rootOnly="true"  
scaleFactor="0.5" tree="@Tree.t:atp6\_pos2" weight="3.0"/>

<operator id="UniformOperator.t:atp6\_pos2" spec="Uniform" tree="@Tree.t:atp6\_pos2"  
weight="30.0"/>

<operator id="SubtreeSlide.t:atp6\_pos2" spec="SubtreeSlide" tree="@Tree.t:atp6\_pos2"  
weight="15.0"/>

<operator id="narrow.t:atp6\_pos2" spec="Exchange" tree="@Tree.t:atp6\_pos2"  
weight="15.0"/>

```
<operator id="wide.t:atp6_pos2" spec="Exchange" isNarrow="false"  
tree="@Tree.t:atp6_pos2" weight="3.0"/>
```

```
<operator id="WilsonBalding.t:atp6_pos2" spec="WilsonBalding" tree="@Tree.t:atp6_pos2"  
weight="3.0"/>
```

```
<operator id="strictClockUpDownOperator.c:atp6_pos2" spec="UpDownOperator"  
scaleFactor="0.75" weight="3.0">
```

```
<up idref="clockRate.c:atp6_pos2"/>
```

```
<down idref="Tree.t:atp6_pos2"/>
```

```
</operator>
```

```
<operator id="StrictClockRateScaler.c:nd5_pos3" spec="ScaleOperator"  
parameter="@clockRate.c:nd5_pos3" weight="3.0"/>
```

```
<operator id="treeScaler.t:nd5_pos3" spec="ScaleOperator" scaleFactor="0.5"  
tree="@Tree.t:nd5_pos3" weight="3.0"/>
```

```
<operator id="treeRootScaler.t:nd5_pos3" spec="ScaleOperator" rootOnly="true"  
scaleFactor="0.5" tree="@Tree.t:nd5_pos3" weight="3.0"/>
```

```
<operator id="UniformOperator.t:nd5_pos3" spec="Uniform" tree="@Tree.t:nd5_pos3"  
weight="30.0"/>
```

```
<operator id="SubtreeSlide.t:nd5_pos3" spec="SubtreeSlide" tree="@Tree.t:nd5_pos3"  
weight="15.0"/>
```

```
<operator id="narrow.t:nd5_pos3" spec="Exchange" tree="@Tree.t:nd5_pos3"  
weight="15.0"/>
```

```
<operator id="wide.t:nd5_pos3" spec="Exchange" isNarrow="false"  
tree="@Tree.t:nd5_pos3" weight="3.0"/>
```

```
<operator id="WilsonBalding.t:nd5_pos3" spec="WilsonBalding" tree="@Tree.t:nd5_pos3"  
weight="3.0"/>
```

<operator id="strictClockUpDownOperator.c:nd5\_pos3" spec="UpDownOperator"  
scaleFactor="0.75" weight="3.0">

<up idref="clockRate.c:nd5\_pos3"/>

<down idref="Tree.t:nd5\_pos3"/>

</operator>

<operator id="StrictClockRateScaler.c:atp6\_pos3" spec="ScaleOperator"  
parameter="@clockRate.c:atp6\_pos3" weight="3.0"/>

<operator id="treeScaler.t:atp6\_pos3" spec="ScaleOperator" scaleFactor="0.5"  
tree="@Tree.t:atp6\_pos3" weight="3.0"/>

<operator id="treeRootScaler.t:atp6\_pos3" spec="ScaleOperator" rootOnly="true"  
scaleFactor="0.5" tree="@Tree.t:atp6\_pos3" weight="3.0"/>

<operator id="UniformOperator.t:atp6\_pos3" spec="Uniform" tree="@Tree.t:atp6\_pos3"  
weight="30.0"/>

<operator id="SubtreeSlide.t:atp6\_pos3" spec="SubtreeSlide" tree="@Tree.t:atp6\_pos3"  
weight="15.0"/>

<operator id="narrow.t:atp6\_pos3" spec="Exchange" tree="@Tree.t:atp6\_pos3"  
weight="15.0"/>

<operator id="wide.t:atp6\_pos3" spec="Exchange" isNarrow="false"  
tree="@Tree.t:atp6\_pos3" weight="3.0"/>

<operator id="WilsonBalding.t:atp6\_pos3" spec="WilsonBalding" tree="@Tree.t:atp6\_pos3"  
weight="3.0"/>

<operator id="strictClockUpDownOperator.c:atp6\_pos3" spec="UpDownOperator"  
scaleFactor="0.75" weight="3.0">

<up idref="clockRate.c:atp6\_pos3"/>

<down idref="Tree.t:atp6\_pos3"/>

</operator>

```
<operator id="StrictClockRateScaler.c:nd3_pos1" spec="ScaleOperator"
parameter="@clockRate.c:nd3_pos1" weight="3.0"/>
```

```
<operator id="treeScaler.t:nd3_pos1" spec="ScaleOperator" scaleFactor="0.5"
tree="@Tree.t:nd3_pos1" weight="3.0"/>
```

```
<operator id="treeRootScaler.t:nd3_pos1" spec="ScaleOperator" rootOnly="true"
scaleFactor="0.5" tree="@Tree.t:nd3_pos1" weight="3.0"/>
```

```
<operator id="UniformOperator.t:nd3_pos1" spec="Uniform" tree="@Tree.t:nd3_pos1"
weight="30.0"/>
```

```
<operator id="SubtreeSlide.t:nd3_pos1" spec="SubtreeSlide" tree="@Tree.t:nd3_pos1"
weight="15.0"/>
```

```
<operator id="narrow.t:nd3_pos1" spec="Exchange" tree="@Tree.t:nd3_pos1"
weight="15.0"/>
```

```
<operator id="wide.t:nd3_pos1" spec="Exchange" isNarrow="false"
tree="@Tree.t:nd3_pos1" weight="3.0"/>
```

```
<operator id="WilsonBalding.t:nd3_pos1" spec="WilsonBalding" tree="@Tree.t:nd3_pos1"
weight="3.0"/>
```

```
<operator id="strictClockUpDownOperator.c:nd3_pos1" spec="UpDownOperator"
scaleFactor="0.75" weight="3.0">
```

```
<up idref="clockRate.c:nd3_pos1"/>
```

```
<down idref="Tree.t:nd3_pos1"/>
```

```
</operator>
```

```
<operator id="StrictClockRateScaler.c:nd6_pos2" spec="ScaleOperator"
parameter="@clockRate.c:nd6_pos2" weight="3.0"/>
```

```
<operator id="treeScaler.t:nd6_pos2" spec="ScaleOperator" scaleFactor="0.5"
tree="@Tree.t:nd6_pos2" weight="3.0"/>
```

```
<operator id="treeRootScaler.t:nd6_pos2" spec="ScaleOperator" rootOnly="true"
scaleFactor="0.5" tree="@Tree.t:nd6_pos2" weight="3.0"/>
```

```
<operator id="UniformOperator.t:nd6_pos2" spec="Uniform" tree="@Tree.t:nd6_pos2"
weight="30.0"/>
```

```
<operator id="SubtreeSlide.t:nd6_pos2" spec="SubtreeSlide" tree="@Tree.t:nd6_pos2"
weight="15.0"/>
```

```
<operator id="narrow.t:nd6_pos2" spec="Exchange" tree="@Tree.t:nd6_pos2"
weight="15.0"/>
```

```
<operator id="wide.t:nd6_pos2" spec="Exchange" isNarrow="false"
tree="@Tree.t:nd6_pos2" weight="3.0"/>
```

```
<operator id="WilsonBalding.t:nd6_pos2" spec="WilsonBalding" tree="@Tree.t:nd6_pos2"
weight="3.0"/>
```

```
<operator id="strictClockUpDownOperator.c:nd6_pos2" spec="UpDownOperator"
scaleFactor="0.75" weight="3.0">
```

```
<up idref="clockRate.c:nd6_pos2"/>
```

```
<down idref="Tree.t:nd6_pos2"/>
```

```
</operator>
```

```
<operator id="StrictClockRateScaler.c:coiii_pos1" spec="ScaleOperator"
parameter="@clockRate.c:coiii_pos1" weight="3.0"/>
```

```
<operator id="treeScaler.t:coiii_pos1" spec="ScaleOperator" scaleFactor="0.5"
tree="@Tree.t:coiii_pos1" weight="3.0"/>
```

```
<operator id="treeRootScaler.t:coiii_pos1" spec="ScaleOperator" rootOnly="true"
scaleFactor="0.5" tree="@Tree.t:coiii_pos1" weight="3.0"/>
```

```
<operator id="UniformOperator.t:coiii_pos1" spec="Uniform" tree="@Tree.t:coiii_pos1"
weight="30.0"/>
```



<operator id="SubtreeSlide.t:coiii\_pos1" spec="SubtreeSlide" tree="@Tree.t:coiii\_pos1"  
weight="15.0"/>

<operator id="narrow.t:coiii\_pos1" spec="Exchange" tree="@Tree.t:coiii\_pos1"  
weight="15.0"/>

<operator id="wide.t:coiii\_pos1" spec="Exchange" isNarrow="false"  
tree="@Tree.t:coiii\_pos1" weight="3.0"/>

<operator id="WilsonBalding.t:coiii\_pos1" spec="WilsonBalding" tree="@Tree.t:coiii\_pos1"  
weight="3.0"/>

<operator id="strictClockUpDownOperator.c:coiii\_pos1" spec="UpDownOperator"  
scaleFactor="0.75" weight="3.0">

<up idref="clockRate.c:coiii\_pos1"/>

<down idref="Tree.t:coiii\_pos1"/>

</operator>

<operator id="StrictClockRateScaler.c:atp8\_pos1" spec="ScaleOperator"  
parameter="@clockRate.c:atp8\_pos1" weight="3.0"/>

<operator id="treeScaler.t:atp8\_pos1" spec="ScaleOperator" scaleFactor="0.5"  
tree="@Tree.t:atp8\_pos1" weight="3.0"/>

<operator id="treeRootScaler.t:atp8\_pos1" spec="ScaleOperator" rootOnly="true"  
scaleFactor="0.5" tree="@Tree.t:atp8\_pos1" weight="3.0"/>

<operator id="UniformOperator.t:atp8\_pos1" spec="Uniform" tree="@Tree.t:atp8\_pos1"  
weight="30.0"/>

<operator id="SubtreeSlide.t:atp8\_pos1" spec="SubtreeSlide" tree="@Tree.t:atp8\_pos1"  
weight="15.0"/>

<operator id="narrow.t:atp8\_pos1" spec="Exchange" tree="@Tree.t:atp8\_pos1"  
weight="15.0"/>

<operator id="wide.t:atp8\_pos1" spec="Exchange" isNarrow="false"  
tree="@Tree.t:atp8\_pos1" weight="3.0"/>

<operator id="WilsonBalding.t:atp8\_pos1" spec="WilsonBalding" tree="@Tree.t:atp8\_pos1"  
weight="3.0"/>

<operator id="strictClockUpDownOperator.c:atp8\_pos1" spec="UpDownOperator"  
scaleFactor="0.75" weight="3.0">

<up idref="clockRate.c:atp8\_pos1"/>

<down idref="Tree.t:atp8\_pos1"/>

</operator>

<operator id="StrictClockRateScaler.c:nd5\_pos2" spec="ScaleOperator"  
parameter="@clockRate.c:nd5\_pos2" weight="3.0"/>

<operator id="treeScaler.t:nd5\_pos2" spec="ScaleOperator" scaleFactor="0.5"  
tree="@Tree.t:nd5\_pos2" weight="3.0"/>

<operator id="treeRootScaler.t:nd5\_pos2" spec="ScaleOperator" rootOnly="true"  
scaleFactor="0.5" tree="@Tree.t:nd5\_pos2" weight="3.0"/>

<operator id="UniformOperator.t:nd5\_pos2" spec="Uniform" tree="@Tree.t:nd5\_pos2"  
weight="30.0"/>

<operator id="SubtreeSlide.t:nd5\_pos2" spec="SubtreeSlide" tree="@Tree.t:nd5\_pos2"  
weight="15.0"/>

<operator id="narrow.t:nd5\_pos2" spec="Exchange" tree="@Tree.t:nd5\_pos2"  
weight="15.0"/>

<operator id="wide.t:nd5\_pos2" spec="Exchange" isNarrow="false"  
tree="@Tree.t:nd5\_pos2" weight="3.0"/>

<operator id="WilsonBalding.t:nd5\_pos2" spec="WilsonBalding" tree="@Tree.t:nd5\_pos2"  
weight="3.0"/>

```
<operator id="strictClockUpDownOperator.c:nd5_pos2" spec="UpDownOperator"
scaleFactor="0.75" weight="3.0">
```

```
<up idref="clockRate.c:nd5_pos2"/>
```

```
<down idref="Tree.t:nd5_pos2"/>
```

```
</operator>
```

```
<operator id="StrictClockRateScaler.c:nd3_pos3" spec="ScaleOperator"
parameter="@clockRate.c:nd3_pos3" weight="3.0"/>
```

```
<operator id="treeScaler.t:nd3_pos3" spec="ScaleOperator" scaleFactor="0.5"
tree="@Tree.t:nd3_pos3" weight="3.0"/>
```

```
<operator id="treeRootScaler.t:nd3_pos3" spec="ScaleOperator" rootOnly="true"
scaleFactor="0.5" tree="@Tree.t:nd3_pos3" weight="3.0"/>
```

```
<operator id="UniformOperator.t:nd3_pos3" spec="Uniform" tree="@Tree.t:nd3_pos3"
weight="30.0"/>
```

```
<operator id="SubtreeSlide.t:nd3_pos3" spec="SubtreeSlide" tree="@Tree.t:nd3_pos3"
weight="15.0"/>
```

```
<operator id="narrow.t:nd3_pos3" spec="Exchange" tree="@Tree.t:nd3_pos3"
weight="15.0"/>
```

```
<operator id="wide.t:nd3_pos3" spec="Exchange" isNarrow="false"
tree="@Tree.t:nd3_pos3" weight="3.0"/>
```

```
<operator id="WilsonBalding.t:nd3_pos3" spec="WilsonBalding" tree="@Tree.t:nd3_pos3"
weight="3.0"/>
```

```
<operator id="strictClockUpDownOperator.c:nd3_pos3" spec="UpDownOperator"
scaleFactor="0.75" weight="3.0">
```

```
<up idref="clockRate.c:nd3_pos3"/>
```

```
<down idref="Tree.t:nd3_pos3"/>
```

</operator>

<operator id="StrictClockRateScaler.c:cytb\_pos3" spec="ScaleOperator"  
parameter="@clockRate.c:cytb\_pos3" weight="3.0"/>

<operator id="treeScaler.t:cytb\_pos3" spec="ScaleOperator" scaleFactor="0.5"  
tree="@Tree.t:cytb\_pos3" weight="3.0"/>

<operator id="treeRootScaler.t:cytb\_pos3" spec="ScaleOperator" rootOnly="true"  
scaleFactor="0.5" tree="@Tree.t:cytb\_pos3" weight="3.0"/>

<operator id="UniformOperator.t:cytb\_pos3" spec="Uniform" tree="@Tree.t:cytb\_pos3"  
weight="30.0"/>

<operator id="SubtreeSlide.t:cytb\_pos3" spec="SubtreeSlide" tree="@Tree.t:cytb\_pos3"  
weight="15.0"/>

<operator id="narrow.t:cytb\_pos3" spec="Exchange" tree="@Tree.t:cytb\_pos3"  
weight="15.0"/>

<operator id="wide.t:cytb\_pos3" spec="Exchange" isNarrow="false"  
tree="@Tree.t:cytb\_pos3" weight="3.0"/>

<operator id="WilsonBalding.t:cytb\_pos3" spec="WilsonBalding" tree="@Tree.t:cytb\_pos3"  
weight="3.0"/>

<operator id="strictClockUpDownOperator.c:cytb\_pos3" spec="UpDownOperator"  
scaleFactor="0.75" weight="3.0">

<up idref="clockRate.c:cytb\_pos3"/>

<down idref="Tree.t:cytb\_pos3"/>

</operator>

<operator id="StrictClockRateScaler.c:cytb\_pos1" spec="ScaleOperator"  
parameter="@clockRate.c:cytb\_pos1" weight="3.0"/>

```
<operator id="treeScaler.t:cytb_pos1" spec="ScaleOperator" scaleFactor="0.5"
tree="@Tree.t:cytb_pos1" weight="3.0"/>
```

```
<operator id="treeRootScaler.t:cytb_pos1" spec="ScaleOperator" rootOnly="true"
scaleFactor="0.5" tree="@Tree.t:cytb_pos1" weight="3.0"/>
```

```
<operator id="UniformOperator.t:cytb_pos1" spec="Uniform" tree="@Tree.t:cytb_pos1"
weight="30.0"/>
```

```
<operator id="SubtreeSlide.t:cytb_pos1" spec="SubtreeSlide" tree="@Tree.t:cytb_pos1"
weight="15.0"/>
```

```
<operator id="narrow.t:cytb_pos1" spec="Exchange" tree="@Tree.t:cytb_pos1"
weight="15.0"/>
```

```
<operator id="wide.t:cytb_pos1" spec="Exchange" isNarrow="false"
tree="@Tree.t:cytb_pos1" weight="3.0"/>
```

```
<operator id="WilsonBalding.t:cytb_pos1" spec="WilsonBalding" tree="@Tree.t:cytb_pos1"
weight="3.0"/>
```

```
<operator id="strictClockUpDownOperator.c:cytb_pos1" spec="UpDownOperator"
scaleFactor="0.75" weight="3.0">
```

```
<up idref="clockRate.c:cytb_pos1"/>
```

```
<down idref="Tree.t:cytb_pos1"/>
```

```
</operator>
```

```
<operator id="StrictClockRateScaler.c:cytb_pos2" spec="ScaleOperator"
parameter="@clockRate.c:cytb_pos2" weight="3.0"/>
```

```
<operator id="treeScaler.t:cytb_pos2" spec="ScaleOperator" scaleFactor="0.5"
tree="@Tree.t:cytb_pos2" weight="3.0"/>
```

```
<operator id="treeRootScaler.t:cytb_pos2" spec="ScaleOperator" rootOnly="true"
scaleFactor="0.5" tree="@Tree.t:cytb_pos2" weight="3.0"/>
```

```
<operator id="UniformOperator.t:cytb_pos2" spec="Uniform" tree="@Tree.t:cytb_pos2"
weight="30.0"/>
```

```
<operator id="SubtreeSlide.t:cytb_pos2" spec="SubtreeSlide" tree="@Tree.t:cytb_pos2"
weight="15.0"/>
```

```
<operator id="narrow.t:cytb_pos2" spec="Exchange" tree="@Tree.t:cytb_pos2"
weight="15.0"/>
```

```
<operator id="wide.t:cytb_pos2" spec="Exchange" isNarrow="false"
tree="@Tree.t:cytb_pos2" weight="3.0"/>
```

```
<operator id="WilsonBalding.t:cytb_pos2" spec="WilsonBalding" tree="@Tree.t:cytb_pos2"
weight="3.0"/>
```

```
<operator id="strictClockUpDownOperator.c:cytb_pos2" spec="UpDownOperator"
scaleFactor="0.75" weight="3.0">
```

```
<up idref="clockRate.c:cytb_pos2"/>
```

```
<down idref="Tree.t:cytb_pos2"/>
```

```
</operator>
```

```
<operator id="StrictClockRateScaler.c:nd3_pos2" spec="ScaleOperator"
parameter="@clockRate.c:nd3_pos2" weight="3.0"/>
```

```
<operator id="treeScaler.t:nd3_pos2" spec="ScaleOperator" scaleFactor="0.5"
tree="@Tree.t:nd3_pos2" weight="3.0"/>
```

```
<operator id="treeRootScaler.t:nd3_pos2" spec="ScaleOperator" rootOnly="true"
scaleFactor="0.5" tree="@Tree.t:nd3_pos2" weight="3.0"/>
```

```
<operator id="UniformOperator.t:nd3_pos2" spec="Uniform" tree="@Tree.t:nd3_pos2"
weight="30.0"/>
```

```
<operator id="SubtreeSlide.t:nd3_pos2" spec="SubtreeSlide" tree="@Tree.t:nd3_pos2"
weight="15.0"/>
```

<operator id="narrow.t:nd3\_pos2" spec="Exchange" tree="@Tree.t:nd3\_pos2"  
weight="15.0"/>

<operator id="wide.t:nd3\_pos2" spec="Exchange" isNarrow="false"  
tree="@Tree.t:nd3\_pos2" weight="3.0"/>

<operator id="WilsonBalding.t:nd3\_pos2" spec="WilsonBalding" tree="@Tree.t:nd3\_pos2"  
weight="3.0"/>

<operator id="strictClockUpDownOperator.c:nd3\_pos2" spec="UpDownOperator"  
scaleFactor="0.75" weight="3.0">

<up idref="clockRate.c:nd3\_pos2"/>

<down idref="Tree.t:nd3\_pos2"/>

</operator>

<operator id="StrictClockRateScaler.c:coi\_pos1" spec="ScaleOperator"  
parameter="@clockRate.c:coi\_pos1" weight="3.0"/>

<operator id="treeScaler.t:coi\_pos1" spec="ScaleOperator" scaleFactor="0.5"  
tree="@Tree.t:coi\_pos1" weight="3.0"/>

<operator id="treeRootScaler.t:coi\_pos1" spec="ScaleOperator" rootOnly="true"  
scaleFactor="0.5" tree="@Tree.t:coi\_pos1" weight="3.0"/>

<operator id="UniformOperator.t:coi\_pos1" spec="Uniform" tree="@Tree.t:coi\_pos1"  
weight="30.0"/>

<operator id="SubtreeSlide.t:coi\_pos1" spec="SubtreeSlide" tree="@Tree.t:coi\_pos1"  
weight="15.0"/>

<operator id="narrow.t:coi\_pos1" spec="Exchange" tree="@Tree.t:coi\_pos1"  
weight="15.0"/>

<operator id="wide.t:coi\_pos1" spec="Exchange" isNarrow="false" tree="@Tree.t:coi\_pos1"  
weight="3.0"/>

<operator id="WilsonBalding.t:coi\_pos1" spec="WilsonBalding" tree="@Tree.t:coi\_pos1" weight="3.0"/>

<operator id="strictClockUpDownOperator.c:coi\_pos1" spec="UpDownOperator" scaleFactor="0.75" weight="3.0">

<up idref="clockRate.c:coi\_pos1"/>

<down idref="Tree.t:coi\_pos1"/>

</operator>

<operator id="StrictClockRateScaler.c:coiii\_pos3" spec="ScaleOperator" parameter="@clockRate.c:coiii\_pos3" weight="3.0"/>

<operator id="treeScaler.t:coiii\_pos3" spec="ScaleOperator" scaleFactor="0.5" tree="@Tree.t:coiii\_pos3" weight="3.0"/>

<operator id="treeRootScaler.t:coiii\_pos3" spec="ScaleOperator" rootOnly="true" scaleFactor="0.5" tree="@Tree.t:coiii\_pos3" weight="3.0"/>

<operator id="UniformOperator.t:coiii\_pos3" spec="Uniform" tree="@Tree.t:coiii\_pos3" weight="30.0"/>

<operator id="SubtreeSlide.t:coiii\_pos3" spec="SubtreeSlide" tree="@Tree.t:coiii\_pos3" weight="15.0"/>

<operator id="narrow.t:coiii\_pos3" spec="Exchange" tree="@Tree.t:coiii\_pos3" weight="15.0"/>

<operator id="wide.t:coiii\_pos3" spec="Exchange" isNarrow="false" tree="@Tree.t:coiii\_pos3" weight="3.0"/>

<operator id="WilsonBalding.t:coiii\_pos3" spec="WilsonBalding" tree="@Tree.t:coiii\_pos3" weight="3.0"/>

<operator id="strictClockUpDownOperator.c:coiii\_pos3" spec="UpDownOperator" scaleFactor="0.75" weight="3.0">

<up idref="clockRate.c:coiii\_pos3"/>



```

    <down idref="Tree.t:coiii_pos3"/>

</operator>

<operator id="StrictClockRateScaler.c:nd1_pos2" spec="ScaleOperator"
parameter="@clockRate.c:nd1_pos2" weight="3.0"/>

<operator id="treeScaler.t:nd1_pos2" spec="ScaleOperator" scaleFactor="0.5"
tree="@Tree.t:nd1_pos2" weight="3.0"/>

<operator id="treeRootScaler.t:nd1_pos2" spec="ScaleOperator" rootOnly="true"
scaleFactor="0.5" tree="@Tree.t:nd1_pos2" weight="3.0"/>

<operator id="UniformOperator.t:nd1_pos2" spec="Uniform" tree="@Tree.t:nd1_pos2"
weight="30.0"/>

<operator id="SubtreeSlide.t:nd1_pos2" spec="SubtreeSlide" tree="@Tree.t:nd1_pos2"
weight="15.0"/>

<operator id="narrow.t:nd1_pos2" spec="Exchange" tree="@Tree.t:nd1_pos2"
weight="15.0"/>

<operator id="wide.t:nd1_pos2" spec="Exchange" isNarrow="false"
tree="@Tree.t:nd1_pos2" weight="3.0"/>

<operator id="WilsonBalding.t:nd1_pos2" spec="WilsonBalding" tree="@Tree.t:nd1_pos2"
weight="3.0"/>

<operator id="strictClockUpDownOperator.c:nd1_pos2" spec="UpDownOperator"
scaleFactor="0.75" weight="3.0">
    <up idref="clockRate.c:nd1_pos2"/>
    <down idref="Tree.t:nd1_pos2"/>
</operator>

<operator id="StrictClockRateScaler.c:nd4L_pos2" spec="ScaleOperator"
parameter="@clockRate.c:nd4L_pos2" weight="3.0"/>

```

```
<operator id="treeScaler.t:nd4L_pos2" spec="ScaleOperator" scaleFactor="0.5"
tree="@Tree.t:nd4L_pos2" weight="3.0"/>
```

```
<operator id="treeRootScaler.t:nd4L_pos2" spec="ScaleOperator" rootOnly="true"
scaleFactor="0.5" tree="@Tree.t:nd4L_pos2" weight="3.0"/>
```

```
<operator id="UniformOperator.t:nd4L_pos2" spec="Uniform" tree="@Tree.t:nd4L_pos2"
weight="30.0"/>
```

```
<operator id="SubtreeSlide.t:nd4L_pos2" spec="SubtreeSlide" tree="@Tree.t:nd4L_pos2"
weight="15.0"/>
```

```
<operator id="narrow.t:nd4L_pos2" spec="Exchange" tree="@Tree.t:nd4L_pos2"
weight="15.0"/>
```

```
<operator id="wide.t:nd4L_pos2" spec="Exchange" isNarrow="false"
tree="@Tree.t:nd4L_pos2" weight="3.0"/>
```

```
<operator id="WilsonBalding.t:nd4L_pos2" spec="WilsonBalding"
tree="@Tree.t:nd4L_pos2" weight="3.0"/>
```

```
<operator id="strictClockUpDownOperator.c:nd4L_pos2" spec="UpDownOperator"
scaleFactor="0.75" weight="3.0">
```

```
<up idref="clockRate.c:nd4L_pos2"/>
```

```
<down idref="Tree.t:nd4L_pos2"/>
```

```
</operator>
```

```
<operator id="StrictClockRateScaler.c:atp8_pos3" spec="ScaleOperator"
parameter="@clockRate.c:atp8_pos3" weight="3.0"/>
```

```
<operator id="treeScaler.t:atp8_pos3" spec="ScaleOperator" scaleFactor="0.5"
tree="@Tree.t:atp8_pos3" weight="3.0"/>
```

```
<operator id="treeRootScaler.t:atp8_pos3" spec="ScaleOperator" rootOnly="true"
scaleFactor="0.5" tree="@Tree.t:atp8_pos3" weight="3.0"/>
```

<operator id="UniformOperator.t:atp8\_pos3" spec="Uniform" tree="@Tree.t:atp8\_pos3" weight="30.0"/>

<operator id="SubtreeSlide.t:atp8\_pos3" spec="SubtreeSlide" tree="@Tree.t:atp8\_pos3" weight="15.0"/>

<operator id="narrow.t:atp8\_pos3" spec="Exchange" tree="@Tree.t:atp8\_pos3" weight="15.0"/>

<operator id="wide.t:atp8\_pos3" spec="Exchange" isNarrow="false" tree="@Tree.t:atp8\_pos3" weight="3.0"/>

<operator id="WilsonBalding.t:atp8\_pos3" spec="WilsonBalding" tree="@Tree.t:atp8\_pos3" weight="3.0"/>

<operator id="strictClockUpDownOperator.c:atp8\_pos3" spec="UpDownOperator" scaleFactor="0.75" weight="3.0">

<up idref="clockRate.c:atp8\_pos3"/>

<down idref="Tree.t:atp8\_pos3"/>

</operator>

<operator id="StrictClockRateScaler.c:nd4\_pos2" spec="ScaleOperator" parameter="@clockRate.c:nd4\_pos2" weight="3.0"/>

<operator id="treeScaler.t:nd4\_pos2" spec="ScaleOperator" scaleFactor="0.5" tree="@Tree.t:nd4\_pos2" weight="3.0"/>

<operator id="treeRootScaler.t:nd4\_pos2" spec="ScaleOperator" rootOnly="true" scaleFactor="0.5" tree="@Tree.t:nd4\_pos2" weight="3.0"/>

<operator id="UniformOperator.t:nd4\_pos2" spec="Uniform" tree="@Tree.t:nd4\_pos2" weight="30.0"/>

<operator id="SubtreeSlide.t:nd4\_pos2" spec="SubtreeSlide" tree="@Tree.t:nd4\_pos2" weight="15.0"/>

```
<operator id="narrow.t:nd4_pos2" spec="Exchange" tree="@Tree.t:nd4_pos2"
weight="15.0"/>
```

```
<operator id="wide.t:nd4_pos2" spec="Exchange" isNarrow="false"
tree="@Tree.t:nd4_pos2" weight="3.0"/>
```

```
<operator id="WilsonBalding.t:nd4_pos2" spec="WilsonBalding" tree="@Tree.t:nd4_pos2"
weight="3.0"/>
```

```
<operator id="strictClockUpDownOperator.c:nd4_pos2" spec="UpDownOperator"
scaleFactor="0.75" weight="3.0">
```

```
<up idref="clockRate.c:nd4_pos2"/>
```

```
<down idref="Tree.t:nd4_pos2"/>
```

```
</operator>
```

```
<operator id="StrictClockRateScaler.c:nd6_pos1" spec="ScaleOperator"
parameter="@clockRate.c:nd6_pos1" weight="3.0"/>
```

```
<operator id="treeScaler.t:nd6_pos1" spec="ScaleOperator" scaleFactor="0.5"
tree="@Tree.t:nd6_pos1" weight="3.0"/>
```

```
<operator id="treeRootScaler.t:nd6_pos1" spec="ScaleOperator" rootOnly="true"
scaleFactor="0.5" tree="@Tree.t:nd6_pos1" weight="3.0"/>
```

```
<operator id="UniformOperator.t:nd6_pos1" spec="Uniform" tree="@Tree.t:nd6_pos1"
weight="30.0"/>
```

```
<operator id="SubtreeSlide.t:nd6_pos1" spec="SubtreeSlide" tree="@Tree.t:nd6_pos1"
weight="15.0"/>
```

```
<operator id="narrow.t:nd6_pos1" spec="Exchange" tree="@Tree.t:nd6_pos1"
weight="15.0"/>
```

```
<operator id="wide.t:nd6_pos1" spec="Exchange" isNarrow="false"
tree="@Tree.t:nd6_pos1" weight="3.0"/>
```

<operator id="WilsonBalding.t:nd6\_pos1" spec="WilsonBalding" tree="@Tree.t:nd6\_pos1" weight="3.0"/>

<operator id="strictClockUpDownOperator.c:nd6\_pos1" spec="UpDownOperator" scaleFactor="0.75" weight="3.0">

<up idref="clockRate.c:nd6\_pos1"/>

<down idref="Tree.t:nd6\_pos1"/>

</operator>

<operator id="StrictClockRateScaler.c:nd2\_pos1" spec="ScaleOperator" parameter="@clockRate.c:nd2\_pos1" weight="3.0"/>

<operator id="treeScaler.t:nd2\_pos1" spec="ScaleOperator" scaleFactor="0.5" tree="@Tree.t:nd2\_pos1" weight="3.0"/>

<operator id="treeRootScaler.t:nd2\_pos1" spec="ScaleOperator" rootOnly="true" scaleFactor="0.5" tree="@Tree.t:nd2\_pos1" weight="3.0"/>

<operator id="UniformOperator.t:nd2\_pos1" spec="Uniform" tree="@Tree.t:nd2\_pos1" weight="30.0"/>

<operator id="SubtreeSlide.t:nd2\_pos1" spec="SubtreeSlide" tree="@Tree.t:nd2\_pos1" weight="15.0"/>

<operator id="narrow.t:nd2\_pos1" spec="Exchange" tree="@Tree.t:nd2\_pos1" weight="15.0"/>

<operator id="wide.t:nd2\_pos1" spec="Exchange" isNarrow="false" tree="@Tree.t:nd2\_pos1" weight="3.0"/>

<operator id="WilsonBalding.t:nd2\_pos1" spec="WilsonBalding" tree="@Tree.t:nd2\_pos1" weight="3.0"/>

<operator id="strictClockUpDownOperator.c:nd2\_pos1" spec="UpDownOperator" scaleFactor="0.75" weight="3.0">

```

    <up idref="clockRate.c:nd2_pos1"/>

    <down idref="Tree.t:nd2_pos1"/>

</operator>

<operator id="allTipDatesRandomWalker.t:atp6_pos1" spec="TipDatesRandomWalker"
tree="@Tree.t:atp6_pos1" weight="1.0" windowSize="1.0"/>

<operator id="StrictClockRateScaler.c:Fl26seq-pt8-11401-123ps4" spec="ScaleOperator"
parameter="@clockRate.c:Fl26seq-pt8-11401-123ps4" weight="3.0"/>

<operator id="treeScaler.t:Fl26seq-pt8-11401-123ps4" spec="ScaleOperator"
scaleFactor="0.5" tree="@Tree.t:Fl26seq-pt8-11401-123ps4" weight="3.0"/>

<operator id="treeRootScaler.t:Fl26seq-pt8-11401-123ps4" spec="ScaleOperator"
rootOnly="true" scaleFactor="0.5" tree="@Tree.t:Fl26seq-pt8-11401-123ps4" weight="3.0"/>

<operator id="UniformOperator.t:Fl26seq-pt8-11401-123ps4" spec="Uniform"
tree="@Tree.t:Fl26seq-pt8-11401-123ps4" weight="30.0"/>

<operator id="SubtreeSlide.t:Fl26seq-pt8-11401-123ps4" spec="SubtreeSlide"
tree="@Tree.t:Fl26seq-pt8-11401-123ps4" weight="15.0"/>

<operator id="narrow.t:Fl26seq-pt8-11401-123ps4" spec="Exchange" tree="@Tree.t:Fl26seq-
pt8-11401-123ps4" weight="15.0"/>

<operator id="wide.t:Fl26seq-pt8-11401-123ps4" spec="Exchange" isNarrow="false"
tree="@Tree.t:Fl26seq-pt8-11401-123ps4" weight="3.0"/>

<operator id="WilsonBalding.t:Fl26seq-pt8-11401-123ps4" spec="WilsonBalding"
tree="@Tree.t:Fl26seq-pt8-11401-123ps4" weight="3.0"/>

<operator id="strictClockUpDownOperator.c:Fl26seq-pt8-11401-123ps4"
spec="UpDownOperator" scaleFactor="0.75" weight="3.0">

    <up idref="clockRate.c:Fl26seq-pt8-11401-123ps4"/>

    <down idref="Tree.t:Fl26seq-pt8-11401-123ps4"/>

```

</operator>

<operator id="hyperScaler.hyperLogNormalDistributionModel-M-Fl26sq-Par-oliv+Pleuro"  
spec="ScaleOperator" parameter="@parameter.hyperLogNormalDistributionModel-M-Fl26sq-  
Par-oliv+Pleuro" scaleFactor="0.5" weight="0.1"/>

<operator id="hyperScaler.hyperLogNormalDistributionModel-S-Fl26sq-Par-oliv+Pleuro"  
spec="ScaleOperator" parameter="@parameter.hyperLogNormalDistributionModel-S-Fl26sq-  
Par-oliv+Pleuro" scaleFactor="0.5" weight="0.1"/>

<operator id="hyperScaler.hyperGamma-alpha-  
HyperPrior.hyperLogNormalDistributionModel-M-Fl26sq-Par-oliv+Pleuro"  
spec="ScaleOperator" parameter="@parameter.hyperGamma-alpha-  
HyperPrior.hyperLogNormalDistributionModel-M-Fl26sq-Par-oliv+Pleuro" scaleFactor="0.5"  
weight="0.1"/>

<operator id="hyperScaler.hyperGamma-beta-  
HyperPrior.hyperLogNormalDistributionModel-M-Fl26sq-Par-oliv+Pleuro"  
spec="ScaleOperator" parameter="@parameter.hyperGamma-beta-  
HyperPrior.hyperLogNormalDistributionModel-M-Fl26sq-Par-oliv+Pleuro" scaleFactor="0.5"  
weight="0.1"/>

<operator id="hyperScaler.hyperGamma-alpha-HyperPrior.hyperGamma-alpha-  
HyperPrior.hyperLogNormalDistributionModel-M-Fl26sq-Par-oliv+Pleuro"  
spec="ScaleOperator" parameter="@parameter.hyperGamma-alpha-HyperPrior.hyperGamma-  
alpha-HyperPrior.hyperLogNormalDistributionModel-M-Fl26sq-Par-oliv+Pleuro"  
scaleFactor="0.5" weight="0.1"/>

<operator id="hyperScaler.hyperGamma-beta-HyperPrior.hyperGamma-alpha-  
HyperPrior.hyperLogNormalDistributionModel-M-Fl26sq-Par-oliv+Pleuro"  
spec="ScaleOperator" parameter="@parameter.hyperGamma-beta-HyperPrior.hyperGamma-  
alpha-HyperPrior.hyperLogNormalDistributionModel-M-Fl26sq-Par-oliv+Pleuro"  
scaleFactor="0.5" weight="0.1"/>

<operator id="hyperScaler.hyperGamma-alpha-HyperPrior.hyperGamma-alpha-  
HyperPrior.hyperGamma-alpha-HyperPrior.hyperLogNormalDistributionModel-M-Fl26sq-Par-  
oliv+Pleuro" spec="ScaleOperator" parameter="@parameter.hyperGamma-alpha-  
HyperPrior.hyperGamma-alpha-HyperPrior.hyperGamma-alpha-  
HyperPrior.hyperLogNormalDistributionModel-M-Fl26sq-Par-oliv+Pleuro" scaleFactor="0.5"  
weight="0.1"/>

```
<operator id="hyperScaler.hyperGamma-beta-HyperPrior.hyperGamma-alpha-  
HyperPrior.hyperGamma-alpha-HyperPrior.hyperLogNormalDistributionModel-M-Fl26sq-Par-  
oliv+Pleuro" spec="ScaleOperator" parameter="@parameter.hyperGamma-beta-  
HyperPrior.hyperGamma-alpha-HyperPrior.hyperGamma-alpha-  
HyperPrior.hyperLogNormalDistributionModel-M-Fl26sq-Par-oliv+Pleuro" scaleFactor="0.5"  
weight="0.1"/>
```

```
<operator id="hyperScaler.hyperGamma-alpha-Fl26sq-Par-oliv+Pleuro"  
spec="ScaleOperator" parameter="@parameter.hyperGamma-alpha-Fl26sq-Par-oliv+Pleuro"  
scaleFactor="0.5" weight="0.1"/>
```

```
<operator id="hyperScaler.hyperGamma-beta-Fl26sq-Par-oliv+Pleuro" spec="ScaleOperator"  
parameter="@parameter.hyperGamma-beta-Fl26sq-Par-oliv+Pleuro" scaleFactor="0.5"  
weight="0.1"/>
```

```
<operator id="hyperScaler.hyperGamma-alpha-CalibratedYuleBirthRatePrior.t:nd5_pos2"  
spec="ScaleOperator" parameter="@parameter.hyperGamma-alpha-  
CalibratedYuleBirthRatePrior.t:nd5_pos2" scaleFactor="0.5" weight="0.1"/>
```

```
<operator id="hyperScaler.hyperGamma-beta-CalibratedYuleBirthRatePrior.t:nd5_pos2"  
spec="ScaleOperator" parameter="@parameter.hyperGamma-beta-  
CalibratedYuleBirthRatePrior.t:nd5_pos2" scaleFactor="0.5" weight="0.1"/>
```

```
<operator id="hyperScaler.hyperGamma-alpha-UCMeanRatePrior.c:atp6_pos1"  
spec="ScaleOperator" parameter="@parameter.hyperGamma-alpha-  
UCMeanRatePrior.c:atp6_pos1" scaleFactor="0.5" weight="0.1"/>
```

```
<operator id="hyperScaler.hyperGamma-beta-UCMeanRatePrior.c:atp6_pos1"  
spec="ScaleOperator" parameter="@parameter.hyperGamma-beta-  
UCMeanRatePrior.c:atp6_pos1" scaleFactor="0.5" weight="0.1"/>
```

```
<operator id="ucedMeanScaler.c:atp6_pos1" spec="ScaleOperator"  
parameter="@ucedMean.c:atp6_pos1" scaleFactor="0.5" weight="1.0"/>
```

```
<operator id="ExpCategoriesRandomWalk.c:atp6_pos1" spec="IntRandomWalkOperator"  
parameter="@expRateCategories.c:atp6_pos1" weight="10.0" windowSize="1"/>
```



<operator id="ExpCategoriesSwapOperator.c:atp6\_pos1" spec="SwapOperator"  
intparameter="@expRateCategories.c:atp6\_pos1" weight="10.0"/>

<operator id="ExpCategoriesUniform.c:atp6\_pos1" spec="UniformOperator"  
parameter="@expRateCategories.c:atp6\_pos1" weight="10.0"/>

<operator id="relaxedUpDownOperatorExp.c:atp6\_pos1" spec="UpDownOperator"  
scaleFactor="0.75" weight="3.0">

<up idref="ucedMean.c:atp6\_pos1"/>

<down idref="Tree.t:atp6\_pos1"/>

</operator>

<operator id="hyperScaler.hyperLogNormalDistributionModel-M-Fl26sq-Par-  
oliv+Pleuro1.prior" spec="ScaleOperator"  
parameter="@parameter.hyperLogNormalDistributionModel-M-Fl26sq-Par-oliv+Pleuro1.prior"  
scaleFactor="0.5" weight="0.1"/>

<operator id="hyperScaler.hyperLogNormalDistributionModel-S-Fl26sq-Par-  
oliv+Pleuro1.prior" spec="ScaleOperator"  
parameter="@parameter.hyperLogNormalDistributionModel-S-Fl26sq-Par-oliv+Pleuro1.prior"  
scaleFactor="0.5" weight="0.1"/>

<operator id="hyperScaler.hyperGamma-alpha-ClockPrior.c:Fl26seq-pt8-11401-123ps4"  
spec="ScaleOperator" parameter="@parameter.hyperGamma-alpha-ClockPrior.c:Fl26seq-pt8-  
11401-123ps4" scaleFactor="0.5" weight="0.1"/>

<operator id="hyperScaler.hyperGamma-beta-ClockPrior.c:Fl26seq-pt8-11401-123ps4"  
spec="ScaleOperator" parameter="@parameter.hyperGamma-beta-ClockPrior.c:Fl26seq-pt8-  
11401-123ps4" scaleFactor="0.5" weight="0.1"/>

<operator id="CoalescentConstantTreeScaler.t:Fl26seq-pt8-11401-123ps4"  
spec="ScaleOperator" scaleFactor="0.5" tree="@Tree.t:Fl26seq-pt8-11401-123ps4"  
weight="3.0"/>

<operator id="CoalescentConstantTreeRootScaler.t:Fl26seq-pt8-11401-123ps4"  
spec="ScaleOperator" rootOnly="true" scaleFactor="0.5" tree="@Tree.t:Fl26seq-pt8-11401-  
123ps4" weight="3.0"/>

<operator id="CoalescentConstantUniformOperator.t:Fl26seq-pt8-11401-123ps4"  
spec="Uniform" tree="@Tree.t:Fl26seq-pt8-11401-123ps4" weight="30.0"/>

<operator id="CoalescentConstantSubtreeSlide.t:Fl26seq-pt8-11401-123ps4"  
spec="SubtreeSlide" tree="@Tree.t:Fl26seq-pt8-11401-123ps4" weight="15.0"/>

<operator id="CoalescentConstantNarrow.t:Fl26seq-pt8-11401-123ps4" spec="Exchange"  
tree="@Tree.t:Fl26seq-pt8-11401-123ps4" weight="15.0"/>

<operator id="CoalescentConstantWide.t:Fl26seq-pt8-11401-123ps4" spec="Exchange"  
isNarrow="false" tree="@Tree.t:Fl26seq-pt8-11401-123ps4" weight="3.0"/>

<operator id="CoalescentConstantWilsonBalding.t:Fl26seq-pt8-11401-123ps4"  
spec="WilsonBalding" tree="@Tree.t:Fl26seq-pt8-11401-123ps4" weight="3.0"/>

<operator id="PopSizeScaler.t:Fl26seq-pt8-11401-123ps4" spec="ScaleOperator"  
parameter="@popSize.t:Fl26seq-pt8-11401-123ps4" weight="3.0"/>

<operator id="CoalescentConstantTreeScaler.t:atp6\_pos1" spec="ScaleOperator"  
scaleFactor="0.5" tree="@Tree.t:atp6\_pos1" weight="3.0"/>

<operator id="CoalescentConstantTreeRootScaler.t:atp6\_pos1" spec="ScaleOperator"  
rootOnly="true" scaleFactor="0.5" tree="@Tree.t:atp6\_pos1" weight="3.0"/>

<operator id="CoalescentConstantUniformOperator.t:atp6\_pos1" spec="Uniform"  
tree="@Tree.t:atp6\_pos1" weight="30.0"/>

<operator id="CoalescentConstantSubtreeSlide.t:atp6\_pos1" spec="SubtreeSlide"  
tree="@Tree.t:atp6\_pos1" weight="15.0"/>

<operator id="CoalescentConstantNarrow.t:atp6\_pos1" spec="Exchange"  
tree="@Tree.t:atp6\_pos1" weight="15.0"/>

<operator id="CoalescentConstantWide.t:atp6\_pos1" spec="Exchange" isNarrow="false"  
tree="@Tree.t:atp6\_pos1" weight="3.0"/>

<operator id="CoalescentConstantWilsonBalding.t:atp6\_pos1" spec="WilsonBalding"  
tree="@Tree.t:atp6\_pos1" weight="3.0"/>

<operator id="PopSizeScaler.t:atp6\_pos1" spec="ScaleOperator"  
parameter="@popSize.t:atp6\_pos1" weight="3.0"/>

<operator id="CoalescentConstantTreeScaler.t:atp6\_pos2" spec="ScaleOperator"  
scaleFactor="0.5" tree="@Tree.t:atp6\_pos2" weight="3.0"/>

<operator id="CoalescentConstantTreeRootScaler.t:atp6\_pos2" spec="ScaleOperator"  
rootOnly="true" scaleFactor="0.5" tree="@Tree.t:atp6\_pos2" weight="3.0"/>

<operator id="CoalescentConstantUniformOperator.t:atp6\_pos2" spec="Uniform"  
tree="@Tree.t:atp6\_pos2" weight="30.0"/>

<operator id="CoalescentConstantSubtreeSlide.t:atp6\_pos2" spec="SubtreeSlide"  
tree="@Tree.t:atp6\_pos2" weight="15.0"/>

<operator id="CoalescentConstantNarrow.t:atp6\_pos2" spec="Exchange"  
tree="@Tree.t:atp6\_pos2" weight="15.0"/>

<operator id="CoalescentConstantWide.t:atp6\_pos2" spec="Exchange" isNarrow="false"  
tree="@Tree.t:atp6\_pos2" weight="3.0"/>

<operator id="CoalescentConstantWilsonBalding.t:atp6\_pos2" spec="WilsonBalding"  
tree="@Tree.t:atp6\_pos2" weight="3.0"/>

<operator id="PopSizeScaler.t:atp6\_pos2" spec="ScaleOperator"  
parameter="@popSize.t:atp6\_pos2" weight="3.0"/>

<operator id="CoalescentConstantTreeScaler.t:atp6\_pos3" spec="ScaleOperator"  
scaleFactor="0.5" tree="@Tree.t:atp6\_pos3" weight="3.0"/>

<operator id="CoalescentConstantTreeRootScaler.t:atp6\_pos3" spec="ScaleOperator"  
rootOnly="true" scaleFactor="0.5" tree="@Tree.t:atp6\_pos3" weight="3.0"/>

<operator id="CoalescentConstantUniformOperator.t:atp6\_pos3" spec="Uniform"  
tree="@Tree.t:atp6\_pos3" weight="30.0"/>

<operator id="CoalescentConstantSubtreeSlide.t:atp6\_pos3" spec="SubtreeSlide"  
tree="@Tree.t:atp6\_pos3" weight="15.0"/>

<operator id="CoalescentConstantNarrow.t:atp6\_pos3" spec="Exchange"  
tree="@Tree.t:atp6\_pos3" weight="15.0"/>

<operator id="CoalescentConstantWide.t:atp6\_pos3" spec="Exchange" isNarrow="false"  
tree="@Tree.t:atp6\_pos3" weight="3.0"/>

<operator id="CoalescentConstantWilsonBalding.t:atp6\_pos3" spec="WilsonBalding"  
tree="@Tree.t:atp6\_pos3" weight="3.0"/>

<operator id="PopSizeScaler.t:atp6\_pos3" spec="ScaleOperator"  
parameter="@popSize.t:atp6\_pos3" weight="3.0"/>

<operator id="CoalescentConstantTreeScaler.t:atp8\_pos1" spec="ScaleOperator"  
scaleFactor="0.5" tree="@Tree.t:atp8\_pos1" weight="3.0"/>

<operator id="CoalescentConstantTreeRootScaler.t:atp8\_pos1" spec="ScaleOperator"  
rootOnly="true" scaleFactor="0.5" tree="@Tree.t:atp8\_pos1" weight="3.0"/>

<operator id="CoalescentConstantUniformOperator.t:atp8\_pos1" spec="Uniform"  
tree="@Tree.t:atp8\_pos1" weight="30.0"/>

<operator id="CoalescentConstantSubtreeSlide.t:atp8\_pos1" spec="SubtreeSlide"  
tree="@Tree.t:atp8\_pos1" weight="15.0"/>

<operator id="CoalescentConstantNarrow.t:atp8\_pos1" spec="Exchange"  
tree="@Tree.t:atp8\_pos1" weight="15.0"/>

<operator id="CoalescentConstantWide.t:atp8\_pos1" spec="Exchange" isNarrow="false"  
tree="@Tree.t:atp8\_pos1" weight="3.0"/>

<operator id="CoalescentConstantWilsonBalding.t:atp8\_pos1" spec="WilsonBalding"  
tree="@Tree.t:atp8\_pos1" weight="3.0"/>

<operator id="PopSizeScaler.t:atp8\_pos1" spec="ScaleOperator"  
parameter="@popSize.t:atp8\_pos1" weight="3.0"/>

<operator id="CoalescentConstantTreeScaler.t:atp8\_pos2" spec="ScaleOperator"  
scaleFactor="0.5" tree="@Tree.t:atp8\_pos2" weight="3.0"/>

<operator id="CoalescentConstantTreeRootScaler.t:atp8\_pos2" spec="ScaleOperator"  
rootOnly="true" scaleFactor="0.5" tree="@Tree.t:atp8\_pos2" weight="3.0"/>

<operator id="CoalescentConstantUniformOperator.t:atp8\_pos2" spec="Uniform"  
tree="@Tree.t:atp8\_pos2" weight="30.0"/>

<operator id="CoalescentConstantSubtreeSlide.t:atp8\_pos2" spec="SubtreeSlide"  
tree="@Tree.t:atp8\_pos2" weight="15.0"/>

<operator id="CoalescentConstantNarrow.t:atp8\_pos2" spec="Exchange"  
tree="@Tree.t:atp8\_pos2" weight="15.0"/>

<operator id="CoalescentConstantWide.t:atp8\_pos2" spec="Exchange" isNarrow="false"  
tree="@Tree.t:atp8\_pos2" weight="3.0"/>

<operator id="CoalescentConstantWilsonBalding.t:atp8\_pos2" spec="WilsonBalding"  
tree="@Tree.t:atp8\_pos2" weight="3.0"/>

<operator id="PopSizeScaler.t:atp8\_pos2" spec="ScaleOperator"  
parameter="@popSize.t:atp8\_pos2" weight="3.0"/>

<operator id="CoalescentConstantTreeScaler.t:atp8\_pos3" spec="ScaleOperator"  
scaleFactor="0.5" tree="@Tree.t:atp8\_pos3" weight="3.0"/>

<operator id="CoalescentConstantTreeRootScaler.t:atp8\_pos3" spec="ScaleOperator"  
rootOnly="true" scaleFactor="0.5" tree="@Tree.t:atp8\_pos3" weight="3.0"/>

<operator id="CoalescentConstantUniformOperator.t:atp8\_pos3" spec="Uniform"  
tree="@Tree.t:atp8\_pos3" weight="30.0"/>

<operator id="CoalescentConstantSubtreeSlide.t:atp8\_pos3" spec="SubtreeSlide"  
tree="@Tree.t:atp8\_pos3" weight="15.0"/>

<operator id="CoalescentConstantNarrow.t:atp8\_pos3" spec="Exchange"  
tree="@Tree.t:atp8\_pos3" weight="15.0"/>

<operator id="CoalescentConstantWide.t:atp8\_pos3" spec="Exchange" isNarrow="false"  
tree="@Tree.t:atp8\_pos3" weight="3.0"/>

<operator id="CoalescentConstantWilsonBalding.t:atp8\_pos3" spec="WilsonBalding"  
tree="@Tree.t:atp8\_pos3" weight="3.0"/>

<operator id="PopSizeScaler.t:atp8\_pos3" spec="ScaleOperator"  
parameter="@popSize.t:atp8\_pos3" weight="3.0"/>

<operator id="CoalescentConstantTreeScaler.t:coi\_pos1" spec="ScaleOperator"  
scaleFactor="0.5" tree="@Tree.t:coi\_pos1" weight="3.0"/>

<operator id="CoalescentConstantTreeRootScaler.t:coi\_pos1" spec="ScaleOperator"  
rootOnly="true" scaleFactor="0.5" tree="@Tree.t:coi\_pos1" weight="3.0"/>

<operator id="CoalescentConstantUniformOperator.t:coi\_pos1" spec="Uniform"  
tree="@Tree.t:coi\_pos1" weight="30.0"/>

<operator id="CoalescentConstantSubtreeSlide.t:coi\_pos1" spec="SubtreeSlide"  
tree="@Tree.t:coi\_pos1" weight="15.0"/>

<operator id="CoalescentConstantNarrow.t:coi\_pos1" spec="Exchange"  
tree="@Tree.t:coi\_pos1" weight="15.0"/>

<operator id="CoalescentConstantWide.t:coi\_pos1" spec="Exchange" isNarrow="false"  
tree="@Tree.t:coi\_pos1" weight="3.0"/>

<operator id="CoalescentConstantWilsonBalding.t:coi\_pos1" spec="WilsonBalding"  
tree="@Tree.t:coi\_pos1" weight="3.0"/>

<operator id="PopSizeScaler.t:coi\_pos1" spec="ScaleOperator"  
parameter="@popSize.t:coi\_pos1" weight="3.0"/>

<operator id="CoalescentConstantTreeScaler.t:coi\_pos2" spec="ScaleOperator"  
scaleFactor="0.5" tree="@Tree.t:coi\_pos2" weight="3.0"/>

<operator id="CoalescentConstantTreeRootScaler.t:coi\_pos2" spec="ScaleOperator"  
rootOnly="true" scaleFactor="0.5" tree="@Tree.t:coi\_pos2" weight="3.0"/>

<operator id="CoalescentConstantUniformOperator.t:coi\_pos2" spec="Uniform"  
tree="@Tree.t:coi\_pos2" weight="30.0"/>

<operator id="CoalescentConstantSubtreeSlide.t:coi\_pos2" spec="SubtreeSlide"  
tree="@Tree.t:coi\_pos2" weight="15.0"/>

<operator id="CoalescentConstantNarrow.t:coi\_pos2" spec="Exchange"  
tree="@Tree.t:coi\_pos2" weight="15.0"/>

<operator id="CoalescentConstantWide.t:coi\_pos2" spec="Exchange" isNarrow="false"  
tree="@Tree.t:coi\_pos2" weight="3.0"/>

<operator id="CoalescentConstantWilsonBalding.t:coi\_pos2" spec="WilsonBalding"  
tree="@Tree.t:coi\_pos2" weight="3.0"/>

<operator id="PopSizeScaler.t:coi\_pos2" spec="ScaleOperator"  
parameter="@popSize.t:coi\_pos2" weight="3.0"/>

<operator id="CoalescentConstantTreeScaler.t:coi\_pos3" spec="ScaleOperator"  
scaleFactor="0.5" tree="@Tree.t:coi\_pos3" weight="3.0"/>

<operator id="CoalescentConstantTreeRootScaler.t:coi\_pos3" spec="ScaleOperator"  
rootOnly="true" scaleFactor="0.5" tree="@Tree.t:coi\_pos3" weight="3.0"/>

<operator id="CoalescentConstantUniformOperator.t:coi\_pos3" spec="Uniform"  
tree="@Tree.t:coi\_pos3" weight="30.0"/>

<operator id="CoalescentConstantSubtreeSlide.t:coi\_pos3" spec="SubtreeSlide"  
tree="@Tree.t:coi\_pos3" weight="15.0"/>

<operator id="CoalescentConstantNarrow.t:coi\_pos3" spec="Exchange"  
tree="@Tree.t:coi\_pos3" weight="15.0"/>

<operator id="CoalescentConstantWide.t:coi\_pos3" spec="Exchange" isNarrow="false"  
tree="@Tree.t:coi\_pos3" weight="3.0"/>

<operator id="CoalescentConstantWilsonBalding.t:coi\_pos3" spec="WilsonBalding"  
tree="@Tree.t:coi\_pos3" weight="3.0"/>

<operator id="PopSizeScaler.t:coi\_pos3" spec="ScaleOperator"  
parameter="@popSize.t:coi\_pos3" weight="3.0"/>

<operator id="CoalescentConstantTreeScaler.t:coii\_pos1" spec="ScaleOperator"  
scaleFactor="0.5" tree="@Tree.t:coii\_pos1" weight="3.0"/>

<operator id="CoalescentConstantTreeRootScaler.t:coii\_pos1" spec="ScaleOperator"  
rootOnly="true" scaleFactor="0.5" tree="@Tree.t:coii\_pos1" weight="3.0"/>

<operator id="CoalescentConstantUniformOperator.t:coii\_pos1" spec="Uniform"  
tree="@Tree.t:coii\_pos1" weight="30.0"/>

<operator id="CoalescentConstantSubtreeSlide.t:coii\_pos1" spec="SubtreeSlide"  
tree="@Tree.t:coii\_pos1" weight="15.0"/>

<operator id="CoalescentConstantNarrow.t:coii\_pos1" spec="Exchange"  
tree="@Tree.t:coii\_pos1" weight="15.0"/>

<operator id="CoalescentConstantWide.t:coii\_pos1" spec="Exchange" isNarrow="false"  
tree="@Tree.t:coii\_pos1" weight="3.0"/>



```
<operator id="CoalescentConstantWilsonBalding.t:coii_pos1" spec="WilsonBalding"  
tree="@Tree.t:coii_pos1" weight="3.0"/>
```

```
<operator id="PopSizeScaler.t:coii_pos1" spec="ScaleOperator"  
parameter="@popSize.t:coii_pos1" weight="3.0"/>
```

```
<operator id="CoalescentConstantTreeScaler.t:coii_pos2" spec="ScaleOperator"  
scaleFactor="0.5" tree="@Tree.t:coii_pos2" weight="3.0"/>
```

```
<operator id="CoalescentConstantTreeRootScaler.t:coii_pos2" spec="ScaleOperator"  
rootOnly="true" scaleFactor="0.5" tree="@Tree.t:coii_pos2" weight="3.0"/>
```

```
<operator id="CoalescentConstantUniformOperator.t:coii_pos2" spec="Uniform"  
tree="@Tree.t:coii_pos2" weight="30.0"/>
```

```
<operator id="CoalescentConstantSubtreeSlide.t:coii_pos2" spec="SubtreeSlide"  
tree="@Tree.t:coii_pos2" weight="15.0"/>
```

```
<operator id="CoalescentConstantNarrow.t:coii_pos2" spec="Exchange"  
tree="@Tree.t:coii_pos2" weight="15.0"/>
```

```
<operator id="CoalescentConstantWide.t:coii_pos2" spec="Exchange" isNarrow="false"  
tree="@Tree.t:coii_pos2" weight="3.0"/>
```

```
<operator id="CoalescentConstantWilsonBalding.t:coii_pos2" spec="WilsonBalding"  
tree="@Tree.t:coii_pos2" weight="3.0"/>
```

```
<operator id="PopSizeScaler.t:coii_pos2" spec="ScaleOperator"  
parameter="@popSize.t:coii_pos2" weight="3.0"/>
```

```
<operator id="CoalescentConstantTreeScaler.t:coii_pos3" spec="ScaleOperator"  
scaleFactor="0.5" tree="@Tree.t:coii_pos3" weight="3.0"/>
```

```
<operator id="CoalescentConstantTreeRootScaler.t:coii_pos3" spec="ScaleOperator"  
rootOnly="true" scaleFactor="0.5" tree="@Tree.t:coii_pos3" weight="3.0"/>
```

<operator id="CoalescentConstantUniformOperator.t:coii\_pos3" spec="Uniform"  
tree="@Tree.t:coii\_pos3" weight="30.0"/>

<operator id="CoalescentConstantSubtreeSlide.t:coii\_pos3" spec="SubtreeSlide"  
tree="@Tree.t:coii\_pos3" weight="15.0"/>

<operator id="CoalescentConstantNarrow.t:coii\_pos3" spec="Exchange"  
tree="@Tree.t:coii\_pos3" weight="15.0"/>

<operator id="CoalescentConstantWide.t:coii\_pos3" spec="Exchange" isNarrow="false"  
tree="@Tree.t:coii\_pos3" weight="3.0"/>

<operator id="CoalescentConstantWilsonBalding.t:coii\_pos3" spec="WilsonBalding"  
tree="@Tree.t:coii\_pos3" weight="3.0"/>

<operator id="PopSizeScaler.t:coii\_pos3" spec="ScaleOperator"  
parameter="@popSize.t:coii\_pos3" weight="3.0"/>

<operator id="CoalescentConstantTreeScaler.t:coiii\_pos1" spec="ScaleOperator"  
scaleFactor="0.5" tree="@Tree.t:coiii\_pos1" weight="3.0"/>

<operator id="CoalescentConstantTreeRootScaler.t:coiii\_pos1" spec="ScaleOperator"  
rootOnly="true" scaleFactor="0.5" tree="@Tree.t:coiii\_pos1" weight="3.0"/>

<operator id="CoalescentConstantUniformOperator.t:coiii\_pos1" spec="Uniform"  
tree="@Tree.t:coiii\_pos1" weight="30.0"/>

<operator id="CoalescentConstantSubtreeSlide.t:coiii\_pos1" spec="SubtreeSlide"  
tree="@Tree.t:coiii\_pos1" weight="15.0"/>

<operator id="CoalescentConstantNarrow.t:coiii\_pos1" spec="Exchange"  
tree="@Tree.t:coiii\_pos1" weight="15.0"/>

<operator id="CoalescentConstantWide.t:coiii\_pos1" spec="Exchange" isNarrow="false"  
tree="@Tree.t:coiii\_pos1" weight="3.0"/>

<operator id="CoalescentConstantWilsonBalding.t:coiii\_pos1" spec="WilsonBalding"  
tree="@Tree.t:coiii\_pos1" weight="3.0"/>

<operator id="PopSizeScaler.t:coiii\_pos1" spec="ScaleOperator"  
parameter="@popSize.t:coiii\_pos1" weight="3.0"/>

<operator id="CoalescentConstantTreeScaler.t:coiii\_pos2" spec="ScaleOperator"  
scaleFactor="0.5" tree="@Tree.t:coiii\_pos2" weight="3.0"/>

<operator id="CoalescentConstantTreeRootScaler.t:coiii\_pos2" spec="ScaleOperator"  
rootOnly="true" scaleFactor="0.5" tree="@Tree.t:coiii\_pos2" weight="3.0"/>

<operator id="CoalescentConstantUniformOperator.t:coiii\_pos2" spec="Uniform"  
tree="@Tree.t:coiii\_pos2" weight="30.0"/>

<operator id="CoalescentConstantSubtreeSlide.t:coiii\_pos2" spec="SubtreeSlide"  
tree="@Tree.t:coiii\_pos2" weight="15.0"/>

<operator id="CoalescentConstantNarrow.t:coiii\_pos2" spec="Exchange"  
tree="@Tree.t:coiii\_pos2" weight="15.0"/>

<operator id="CoalescentConstantWide.t:coiii\_pos2" spec="Exchange" isNarrow="false"  
tree="@Tree.t:coiii\_pos2" weight="3.0"/>

<operator id="CoalescentConstantWilsonBalding.t:coiii\_pos2" spec="WilsonBalding"  
tree="@Tree.t:coiii\_pos2" weight="3.0"/>

<operator id="PopSizeScaler.t:coiii\_pos2" spec="ScaleOperator"  
parameter="@popSize.t:coiii\_pos2" weight="3.0"/>

<operator id="CoalescentConstantTreeScaler.t:coiii\_pos3" spec="ScaleOperator"  
scaleFactor="0.5" tree="@Tree.t:coiii\_pos3" weight="3.0"/>

<operator id="CoalescentConstantTreeRootScaler.t:coiii\_pos3" spec="ScaleOperator"  
rootOnly="true" scaleFactor="0.5" tree="@Tree.t:coiii\_pos3" weight="3.0"/>

<operator id="CoalescentConstantUniformOperator.t:coiii\_pos3" spec="Uniform"  
tree="@Tree.t:coiii\_pos3" weight="30.0"/>

<operator id="CoalescentConstantSubtreeSlide.t:coiii\_pos3" spec="SubtreeSlide"  
tree="@Tree.t:coiii\_pos3" weight="15.0"/>

<operator id="CoalescentConstantNarrow.t:coiii\_pos3" spec="Exchange"  
tree="@Tree.t:coiii\_pos3" weight="15.0"/>

<operator id="CoalescentConstantWide.t:coiii\_pos3" spec="Exchange" isNarrow="false"  
tree="@Tree.t:coiii\_pos3" weight="3.0"/>

<operator id="CoalescentConstantWilsonBalding.t:coiii\_pos3" spec="WilsonBalding"  
tree="@Tree.t:coiii\_pos3" weight="3.0"/>

<operator id="PopSizeScaler.t:coiii\_pos3" spec="ScaleOperator"  
parameter="@popSize.t:coiii\_pos3" weight="3.0"/>

<operator id="CoalescentConstantTreeScaler.t:cytb\_pos1" spec="ScaleOperator"  
scaleFactor="0.5" tree="@Tree.t:cytb\_pos1" weight="3.0"/>

<operator id="CoalescentConstantTreeRootScaler.t:cytb\_pos1" spec="ScaleOperator"  
rootOnly="true" scaleFactor="0.5" tree="@Tree.t:cytb\_pos1" weight="3.0"/>

<operator id="CoalescentConstantUniformOperator.t:cytb\_pos1" spec="Uniform"  
tree="@Tree.t:cytb\_pos1" weight="30.0"/>

<operator id="CoalescentConstantSubtreeSlide.t:cytb\_pos1" spec="SubtreeSlide"  
tree="@Tree.t:cytb\_pos1" weight="15.0"/>

<operator id="CoalescentConstantNarrow.t:cytb\_pos1" spec="Exchange"  
tree="@Tree.t:cytb\_pos1" weight="15.0"/>

<operator id="CoalescentConstantWide.t:cytb\_pos1" spec="Exchange" isNarrow="false"  
tree="@Tree.t:cytb\_pos1" weight="3.0"/>

<operator id="CoalescentConstantWilsonBalding.t:cytb\_pos1" spec="WilsonBalding"  
tree="@Tree.t:cytb\_pos1" weight="3.0"/>

<operator id="PopSizeScaler.t:cytb\_pos1" spec="ScaleOperator"  
parameter="@popSize.t:cytb\_pos1" weight="3.0"/>

<operator id="CoalescentConstantTreeScaler.t:cytb\_pos2" spec="ScaleOperator"  
scaleFactor="0.5" tree="@Tree.t:cytb\_pos2" weight="3.0"/>

<operator id="CoalescentConstantTreeRootScaler.t:cytb\_pos2" spec="ScaleOperator"  
rootOnly="true" scaleFactor="0.5" tree="@Tree.t:cytb\_pos2" weight="3.0"/>

<operator id="CoalescentConstantUniformOperator.t:cytb\_pos2" spec="Uniform"  
tree="@Tree.t:cytb\_pos2" weight="30.0"/>

<operator id="CoalescentConstantSubtreeSlide.t:cytb\_pos2" spec="SubtreeSlide"  
tree="@Tree.t:cytb\_pos2" weight="15.0"/>

<operator id="CoalescentConstantNarrow.t:cytb\_pos2" spec="Exchange"  
tree="@Tree.t:cytb\_pos2" weight="15.0"/>

<operator id="CoalescentConstantWide.t:cytb\_pos2" spec="Exchange" isNarrow="false"  
tree="@Tree.t:cytb\_pos2" weight="3.0"/>

<operator id="CoalescentConstantWilsonBalding.t:cytb\_pos2" spec="WilsonBalding"  
tree="@Tree.t:cytb\_pos2" weight="3.0"/>

<operator id="PopSizeScaler.t:cytb\_pos2" spec="ScaleOperator"  
parameter="@popSize.t:cytb\_pos2" weight="3.0"/>

<operator id="CoalescentConstantTreeScaler.t:cytb\_pos3" spec="ScaleOperator"  
scaleFactor="0.5" tree="@Tree.t:cytb\_pos3" weight="3.0"/>

<operator id="CoalescentConstantTreeRootScaler.t:cytb\_pos3" spec="ScaleOperator"  
rootOnly="true" scaleFactor="0.5" tree="@Tree.t:cytb\_pos3" weight="3.0"/>

<operator id="CoalescentConstantUniformOperator.t:cytb\_pos3" spec="Uniform"  
tree="@Tree.t:cytb\_pos3" weight="30.0"/>

<operator id="CoalescentConstantSubtreeSlide.t:cytb\_pos3" spec="SubtreeSlide"  
tree="@Tree.t:cytb\_pos3" weight="15.0"/>

<operator id="CoalescentConstantNarrow.t:cytb\_pos3" spec="Exchange"  
tree="@Tree.t:cytb\_pos3" weight="15.0"/>

<operator id="CoalescentConstantWide.t:cytb\_pos3" spec="Exchange" isNarrow="false"  
tree="@Tree.t:cytb\_pos3" weight="3.0"/>

<operator id="CoalescentConstantWilsonBalding.t:cytb\_pos3" spec="WilsonBalding"  
tree="@Tree.t:cytb\_pos3" weight="3.0"/>

<operator id="PopSizeScaler.t:cytb\_pos3" spec="ScaleOperator"  
parameter="@popSize.t:cytb\_pos3" weight="3.0"/>

<operator id="CoalescentConstantTreeScaler.t:nd1\_pos1" spec="ScaleOperator"  
scaleFactor="0.5" tree="@Tree.t:nd1\_pos1" weight="3.0"/>

<operator id="CoalescentConstantTreeRootScaler.t:nd1\_pos1" spec="ScaleOperator"  
rootOnly="true" scaleFactor="0.5" tree="@Tree.t:nd1\_pos1" weight="3.0"/>

<operator id="CoalescentConstantUniformOperator.t:nd1\_pos1" spec="Uniform"  
tree="@Tree.t:nd1\_pos1" weight="30.0"/>

<operator id="CoalescentConstantSubtreeSlide.t:nd1\_pos1" spec="SubtreeSlide"  
tree="@Tree.t:nd1\_pos1" weight="15.0"/>

<operator id="CoalescentConstantNarrow.t:nd1\_pos1" spec="Exchange"  
tree="@Tree.t:nd1\_pos1" weight="15.0"/>

<operator id="CoalescentConstantWide.t:nd1\_pos1" spec="Exchange" isNarrow="false"  
tree="@Tree.t:nd1\_pos1" weight="3.0"/>

```
<operator id="CoalescentConstantWilsonBalding.t:nd1_pos1" spec="WilsonBalding"  
tree="@Tree.t:nd1_pos1" weight="3.0"/>
```

```
<operator id="PopSizeScaler.t:nd1_pos1" spec="ScaleOperator"  
parameter="@popSize.t:nd1_pos1" weight="3.0"/>
```

```
<operator id="CoalescentConstantTreeScaler.t:nd1_pos2" spec="ScaleOperator"  
scaleFactor="0.5" tree="@Tree.t:nd1_pos2" weight="3.0"/>
```

```
<operator id="CoalescentConstantTreeRootScaler.t:nd1_pos2" spec="ScaleOperator"  
rootOnly="true" scaleFactor="0.5" tree="@Tree.t:nd1_pos2" weight="3.0"/>
```

```
<operator id="CoalescentConstantUniformOperator.t:nd1_pos2" spec="Uniform"  
tree="@Tree.t:nd1_pos2" weight="30.0"/>
```

```
<operator id="CoalescentConstantSubtreeSlide.t:nd1_pos2" spec="SubtreeSlide"  
tree="@Tree.t:nd1_pos2" weight="15.0"/>
```

```
<operator id="CoalescentConstantNarrow.t:nd1_pos2" spec="Exchange"  
tree="@Tree.t:nd1_pos2" weight="15.0"/>
```

```
<operator id="CoalescentConstantWide.t:nd1_pos2" spec="Exchange" isNarrow="false"  
tree="@Tree.t:nd1_pos2" weight="3.0"/>
```

```
<operator id="CoalescentConstantWilsonBalding.t:nd1_pos2" spec="WilsonBalding"  
tree="@Tree.t:nd1_pos2" weight="3.0"/>
```

```
<operator id="PopSizeScaler.t:nd1_pos2" spec="ScaleOperator"  
parameter="@popSize.t:nd1_pos2" weight="3.0"/>
```

```
<operator id="CoalescentConstantTreeScaler.t:nd1_pos3" spec="ScaleOperator"  
scaleFactor="0.5" tree="@Tree.t:nd1_pos3" weight="3.0"/>
```

```
<operator id="CoalescentConstantTreeRootScaler.t:nd1_pos3" spec="ScaleOperator"  
rootOnly="true" scaleFactor="0.5" tree="@Tree.t:nd1_pos3" weight="3.0"/>
```

<operator id="CoalescentConstantUniformOperator.t:nd1\_pos3" spec="Uniform"  
tree="@Tree.t:nd1\_pos3" weight="30.0"/>

<operator id="CoalescentConstantSubtreeSlide.t:nd1\_pos3" spec="SubtreeSlide"  
tree="@Tree.t:nd1\_pos3" weight="15.0"/>

<operator id="CoalescentConstantNarrow.t:nd1\_pos3" spec="Exchange"  
tree="@Tree.t:nd1\_pos3" weight="15.0"/>

<operator id="CoalescentConstantWide.t:nd1\_pos3" spec="Exchange" isNarrow="false"  
tree="@Tree.t:nd1\_pos3" weight="3.0"/>

<operator id="CoalescentConstantWilsonBalding.t:nd1\_pos3" spec="WilsonBalding"  
tree="@Tree.t:nd1\_pos3" weight="3.0"/>

<operator id="PopSizeScaler.t:nd1\_pos3" spec="ScaleOperator"  
parameter="@popSize.t:nd1\_pos3" weight="3.0"/>

<operator id="CoalescentConstantTreeScaler.t:nd2\_pos1" spec="ScaleOperator"  
scaleFactor="0.5" tree="@Tree.t:nd2\_pos1" weight="3.0"/>

<operator id="CoalescentConstantTreeRootScaler.t:nd2\_pos1" spec="ScaleOperator"  
rootOnly="true" scaleFactor="0.5" tree="@Tree.t:nd2\_pos1" weight="3.0"/>

<operator id="CoalescentConstantUniformOperator.t:nd2\_pos1" spec="Uniform"  
tree="@Tree.t:nd2\_pos1" weight="30.0"/>

<operator id="CoalescentConstantSubtreeSlide.t:nd2\_pos1" spec="SubtreeSlide"  
tree="@Tree.t:nd2\_pos1" weight="15.0"/>

<operator id="CoalescentConstantNarrow.t:nd2\_pos1" spec="Exchange"  
tree="@Tree.t:nd2\_pos1" weight="15.0"/>

<operator id="CoalescentConstantWide.t:nd2\_pos1" spec="Exchange" isNarrow="false"  
tree="@Tree.t:nd2\_pos1" weight="3.0"/>



```
<operator id="CoalescentConstantWilsonBalding.t:nd2_pos1" spec="WilsonBalding"  
tree="@Tree.t:nd2_pos1" weight="3.0"/>
```

```
<operator id="PopSizeScaler.t:nd2_pos1" spec="ScaleOperator"  
parameter="@popSize.t:nd2_pos1" weight="3.0"/>
```

```
<operator id="CoalescentConstantTreeScaler.t:nd2_pos2" spec="ScaleOperator"  
scaleFactor="0.5" tree="@Tree.t:nd2_pos2" weight="3.0"/>
```

```
<operator id="CoalescentConstantTreeRootScaler.t:nd2_pos2" spec="ScaleOperator"  
rootOnly="true" scaleFactor="0.5" tree="@Tree.t:nd2_pos2" weight="3.0"/>
```

```
<operator id="CoalescentConstantUniformOperator.t:nd2_pos2" spec="Uniform"  
tree="@Tree.t:nd2_pos2" weight="30.0"/>
```

```
<operator id="CoalescentConstantSubtreeSlide.t:nd2_pos2" spec="SubtreeSlide"  
tree="@Tree.t:nd2_pos2" weight="15.0"/>
```

```
<operator id="CoalescentConstantNarrow.t:nd2_pos2" spec="Exchange"  
tree="@Tree.t:nd2_pos2" weight="15.0"/>
```

```
<operator id="CoalescentConstantWide.t:nd2_pos2" spec="Exchange" isNarrow="false"  
tree="@Tree.t:nd2_pos2" weight="3.0"/>
```

```
<operator id="CoalescentConstantWilsonBalding.t:nd2_pos2" spec="WilsonBalding"  
tree="@Tree.t:nd2_pos2" weight="3.0"/>
```

```
<operator id="PopSizeScaler.t:nd2_pos2" spec="ScaleOperator"  
parameter="@popSize.t:nd2_pos2" weight="3.0"/>
```

```
<operator id="CoalescentConstantTreeScaler.t:nd2_pos3" spec="ScaleOperator"  
scaleFactor="0.5" tree="@Tree.t:nd2_pos3" weight="3.0"/>
```

```
<operator id="CoalescentConstantTreeRootScaler.t:nd2_pos3" spec="ScaleOperator"  
rootOnly="true" scaleFactor="0.5" tree="@Tree.t:nd2_pos3" weight="3.0"/>
```

<operator id="CoalescentConstantUniformOperator.t:nd2\_pos3" spec="Uniform"  
tree="@Tree.t:nd2\_pos3" weight="30.0"/>

<operator id="CoalescentConstantSubtreeSlide.t:nd2\_pos3" spec="SubtreeSlide"  
tree="@Tree.t:nd2\_pos3" weight="15.0"/>

<operator id="CoalescentConstantNarrow.t:nd2\_pos3" spec="Exchange"  
tree="@Tree.t:nd2\_pos3" weight="15.0"/>

<operator id="CoalescentConstantWide.t:nd2\_pos3" spec="Exchange" isNarrow="false"  
tree="@Tree.t:nd2\_pos3" weight="3.0"/>

<operator id="CoalescentConstantWilsonBalding.t:nd2\_pos3" spec="WilsonBalding"  
tree="@Tree.t:nd2\_pos3" weight="3.0"/>

<operator id="PopSizeScaler.t:nd2\_pos3" spec="ScaleOperator"  
parameter="@popSize.t:nd2\_pos3" weight="3.0"/>

<operator id="CoalescentConstantTreeScaler.t:nd3\_pos1" spec="ScaleOperator"  
scaleFactor="0.5" tree="@Tree.t:nd3\_pos1" weight="3.0"/>

<operator id="CoalescentConstantTreeRootScaler.t:nd3\_pos1" spec="ScaleOperator"  
rootOnly="true" scaleFactor="0.5" tree="@Tree.t:nd3\_pos1" weight="3.0"/>

<operator id="CoalescentConstantUniformOperator.t:nd3\_pos1" spec="Uniform"  
tree="@Tree.t:nd3\_pos1" weight="30.0"/>

<operator id="CoalescentConstantSubtreeSlide.t:nd3\_pos1" spec="SubtreeSlide"  
tree="@Tree.t:nd3\_pos1" weight="15.0"/>

<operator id="CoalescentConstantNarrow.t:nd3\_pos1" spec="Exchange"  
tree="@Tree.t:nd3\_pos1" weight="15.0"/>

<operator id="CoalescentConstantWide.t:nd3\_pos1" spec="Exchange" isNarrow="false"  
tree="@Tree.t:nd3\_pos1" weight="3.0"/>

```
<operator id="CoalescentConstantWilsonBalding.t:nd3_pos1" spec="WilsonBalding"  
tree="@Tree.t:nd3_pos1" weight="3.0"/>
```

```
<operator id="PopSizeScaler.t:nd3_pos1" spec="ScaleOperator"  
parameter="@popSize.t:nd3_pos1" weight="3.0"/>
```

```
<operator id="CoalescentConstantTreeScaler.t:nd3_pos2" spec="ScaleOperator"  
scaleFactor="0.5" tree="@Tree.t:nd3_pos2" weight="3.0"/>
```

```
<operator id="CoalescentConstantTreeRootScaler.t:nd3_pos2" spec="ScaleOperator"  
rootOnly="true" scaleFactor="0.5" tree="@Tree.t:nd3_pos2" weight="3.0"/>
```

```
<operator id="CoalescentConstantUniformOperator.t:nd3_pos2" spec="Uniform"  
tree="@Tree.t:nd3_pos2" weight="30.0"/>
```

```
<operator id="CoalescentConstantSubtreeSlide.t:nd3_pos2" spec="SubtreeSlide"  
tree="@Tree.t:nd3_pos2" weight="15.0"/>
```

```
<operator id="CoalescentConstantNarrow.t:nd3_pos2" spec="Exchange"  
tree="@Tree.t:nd3_pos2" weight="15.0"/>
```

```
<operator id="CoalescentConstantWide.t:nd3_pos2" spec="Exchange" isNarrow="false"  
tree="@Tree.t:nd3_pos2" weight="3.0"/>
```

```
<operator id="CoalescentConstantWilsonBalding.t:nd3_pos2" spec="WilsonBalding"  
tree="@Tree.t:nd3_pos2" weight="3.0"/>
```

```
<operator id="PopSizeScaler.t:nd3_pos2" spec="ScaleOperator"  
parameter="@popSize.t:nd3_pos2" weight="3.0"/>
```

```
<operator id="CoalescentConstantTreeScaler.t:nd3_pos3" spec="ScaleOperator"  
scaleFactor="0.5" tree="@Tree.t:nd3_pos3" weight="3.0"/>
```

```
<operator id="CoalescentConstantTreeRootScaler.t:nd3_pos3" spec="ScaleOperator"  
rootOnly="true" scaleFactor="0.5" tree="@Tree.t:nd3_pos3" weight="3.0"/>
```

<operator id="CoalescentConstantUniformOperator.t:nd3\_pos3" spec="Uniform"  
tree="@Tree.t:nd3\_pos3" weight="30.0"/>

<operator id="CoalescentConstantSubtreeSlide.t:nd3\_pos3" spec="SubtreeSlide"  
tree="@Tree.t:nd3\_pos3" weight="15.0"/>

<operator id="CoalescentConstantNarrow.t:nd3\_pos3" spec="Exchange"  
tree="@Tree.t:nd3\_pos3" weight="15.0"/>

<operator id="CoalescentConstantWide.t:nd3\_pos3" spec="Exchange" isNarrow="false"  
tree="@Tree.t:nd3\_pos3" weight="3.0"/>

<operator id="CoalescentConstantWilsonBalding.t:nd3\_pos3" spec="WilsonBalding"  
tree="@Tree.t:nd3\_pos3" weight="3.0"/>

<operator id="PopSizeScaler.t:nd3\_pos3" spec="ScaleOperator"  
parameter="@popSize.t:nd3\_pos3" weight="3.0"/>

<operator id="CoalescentConstantTreeScaler.t:nd4L\_pos1" spec="ScaleOperator"  
scaleFactor="0.5" tree="@Tree.t:nd4L\_pos1" weight="3.0"/>

<operator id="CoalescentConstantTreeRootScaler.t:nd4L\_pos1" spec="ScaleOperator"  
rootOnly="true" scaleFactor="0.5" tree="@Tree.t:nd4L\_pos1" weight="3.0"/>

<operator id="CoalescentConstantUniformOperator.t:nd4L\_pos1" spec="Uniform"  
tree="@Tree.t:nd4L\_pos1" weight="30.0"/>

<operator id="CoalescentConstantSubtreeSlide.t:nd4L\_pos1" spec="SubtreeSlide"  
tree="@Tree.t:nd4L\_pos1" weight="15.0"/>

<operator id="CoalescentConstantNarrow.t:nd4L\_pos1" spec="Exchange"  
tree="@Tree.t:nd4L\_pos1" weight="15.0"/>

<operator id="CoalescentConstantWide.t:nd4L\_pos1" spec="Exchange" isNarrow="false"  
tree="@Tree.t:nd4L\_pos1" weight="3.0"/>

```
<operator id="CoalescentConstantWilsonBalding.t:nd4L_pos1" spec="WilsonBalding"  
tree="@Tree.t:nd4L_pos1" weight="3.0"/>
```

```
<operator id="PopSizeScaler.t:nd4L_pos1" spec="ScaleOperator"  
parameter="@popSize.t:nd4L_pos1" weight="3.0"/>
```

```
<operator id="CoalescentConstantTreeScaler.t:nd4L_pos2" spec="ScaleOperator"  
scaleFactor="0.5" tree="@Tree.t:nd4L_pos2" weight="3.0"/>
```

```
<operator id="CoalescentConstantTreeRootScaler.t:nd4L_pos2" spec="ScaleOperator"  
rootOnly="true" scaleFactor="0.5" tree="@Tree.t:nd4L_pos2" weight="3.0"/>
```

```
<operator id="CoalescentConstantUniformOperator.t:nd4L_pos2" spec="Uniform"  
tree="@Tree.t:nd4L_pos2" weight="30.0"/>
```

```
<operator id="CoalescentConstantSubtreeSlide.t:nd4L_pos2" spec="SubtreeSlide"  
tree="@Tree.t:nd4L_pos2" weight="15.0"/>
```

```
<operator id="CoalescentConstantNarrow.t:nd4L_pos2" spec="Exchange"  
tree="@Tree.t:nd4L_pos2" weight="15.0"/>
```

```
<operator id="CoalescentConstantWide.t:nd4L_pos2" spec="Exchange" isNarrow="false"  
tree="@Tree.t:nd4L_pos2" weight="3.0"/>
```

```
<operator id="CoalescentConstantWilsonBalding.t:nd4L_pos2" spec="WilsonBalding"  
tree="@Tree.t:nd4L_pos2" weight="3.0"/>
```

```
<operator id="PopSizeScaler.t:nd4L_pos2" spec="ScaleOperator"  
parameter="@popSize.t:nd4L_pos2" weight="3.0"/>
```

```
<operator id="CoalescentConstantTreeScaler.t:nd4L_pos3" spec="ScaleOperator"  
scaleFactor="0.5" tree="@Tree.t:nd4L_pos3" weight="3.0"/>
```

```
<operator id="CoalescentConstantTreeRootScaler.t:nd4L_pos3" spec="ScaleOperator"  
rootOnly="true" scaleFactor="0.5" tree="@Tree.t:nd4L_pos3" weight="3.0"/>
```

<operator id="CoalescentConstantUniformOperator.t:nd4L\_pos3" spec="Uniform"  
tree="@Tree.t:nd4L\_pos3" weight="30.0"/>

<operator id="CoalescentConstantSubtreeSlide.t:nd4L\_pos3" spec="SubtreeSlide"  
tree="@Tree.t:nd4L\_pos3" weight="15.0"/>

<operator id="CoalescentConstantNarrow.t:nd4L\_pos3" spec="Exchange"  
tree="@Tree.t:nd4L\_pos3" weight="15.0"/>

<operator id="CoalescentConstantWide.t:nd4L\_pos3" spec="Exchange" isNarrow="false"  
tree="@Tree.t:nd4L\_pos3" weight="3.0"/>

<operator id="CoalescentConstantWilsonBalding.t:nd4L\_pos3" spec="WilsonBalding"  
tree="@Tree.t:nd4L\_pos3" weight="3.0"/>

<operator id="PopSizeScaler.t:nd4L\_pos3" spec="ScaleOperator"  
parameter="@popSize.t:nd4L\_pos3" weight="3.0"/>

<operator id="CoalescentConstantTreeScaler.t:nd4\_pos1" spec="ScaleOperator"  
scaleFactor="0.5" tree="@Tree.t:nd4\_pos1" weight="3.0"/>

<operator id="CoalescentConstantTreeRootScaler.t:nd4\_pos1" spec="ScaleOperator"  
rootOnly="true" scaleFactor="0.5" tree="@Tree.t:nd4\_pos1" weight="3.0"/>

<operator id="CoalescentConstantUniformOperator.t:nd4\_pos1" spec="Uniform"  
tree="@Tree.t:nd4\_pos1" weight="30.0"/>

<operator id="CoalescentConstantSubtreeSlide.t:nd4\_pos1" spec="SubtreeSlide"  
tree="@Tree.t:nd4\_pos1" weight="15.0"/>

<operator id="CoalescentConstantNarrow.t:nd4\_pos1" spec="Exchange"  
tree="@Tree.t:nd4\_pos1" weight="15.0"/>

<operator id="CoalescentConstantWide.t:nd4\_pos1" spec="Exchange" isNarrow="false"  
tree="@Tree.t:nd4\_pos1" weight="3.0"/>

<operator id="CoalescentConstantWilsonBalding.t:nd4\_pos1" spec="WilsonBalding"  
tree="@Tree.t:nd4\_pos1" weight="3.0"/>

<operator id="PopSizeScaler.t:nd4\_pos1" spec="ScaleOperator"  
parameter="@popSize.t:nd4\_pos1" weight="3.0"/>

<operator id="CoalescentConstantTreeScaler.t:nd4\_pos2" spec="ScaleOperator"  
scaleFactor="0.5" tree="@Tree.t:nd4\_pos2" weight="3.0"/>

<operator id="CoalescentConstantTreeRootScaler.t:nd4\_pos2" spec="ScaleOperator"  
rootOnly="true" scaleFactor="0.5" tree="@Tree.t:nd4\_pos2" weight="3.0"/>

<operator id="CoalescentConstantUniformOperator.t:nd4\_pos2" spec="Uniform"  
tree="@Tree.t:nd4\_pos2" weight="30.0"/>

<operator id="CoalescentConstantSubtreeSlide.t:nd4\_pos2" spec="SubtreeSlide"  
tree="@Tree.t:nd4\_pos2" weight="15.0"/>

<operator id="CoalescentConstantNarrow.t:nd4\_pos2" spec="Exchange"  
tree="@Tree.t:nd4\_pos2" weight="15.0"/>

<operator id="CoalescentConstantWide.t:nd4\_pos2" spec="Exchange" isNarrow="false"  
tree="@Tree.t:nd4\_pos2" weight="3.0"/>

<operator id="CoalescentConstantWilsonBalding.t:nd4\_pos2" spec="WilsonBalding"  
tree="@Tree.t:nd4\_pos2" weight="3.0"/>

<operator id="PopSizeScaler.t:nd4\_pos2" spec="ScaleOperator"  
parameter="@popSize.t:nd4\_pos2" weight="3.0"/>

<operator id="CoalescentConstantTreeScaler.t:nd4\_pos3" spec="ScaleOperator"  
scaleFactor="0.5" tree="@Tree.t:nd4\_pos3" weight="3.0"/>

<operator id="CoalescentConstantTreeRootScaler.t:nd4\_pos3" spec="ScaleOperator"  
rootOnly="true" scaleFactor="0.5" tree="@Tree.t:nd4\_pos3" weight="3.0"/>

<operator id="CoalescentConstantUniformOperator.t:nd4\_pos3" spec="Uniform"  
tree="@Tree.t:nd4\_pos3" weight="30.0"/>

<operator id="CoalescentConstantSubtreeSlide.t:nd4\_pos3" spec="SubtreeSlide"  
tree="@Tree.t:nd4\_pos3" weight="15.0"/>

<operator id="CoalescentConstantNarrow.t:nd4\_pos3" spec="Exchange"  
tree="@Tree.t:nd4\_pos3" weight="15.0"/>

<operator id="CoalescentConstantWide.t:nd4\_pos3" spec="Exchange" isNarrow="false"  
tree="@Tree.t:nd4\_pos3" weight="3.0"/>

<operator id="CoalescentConstantWilsonBalding.t:nd4\_pos3" spec="WilsonBalding"  
tree="@Tree.t:nd4\_pos3" weight="3.0"/>

<operator id="PopSizeScaler.t:nd4\_pos3" spec="ScaleOperator"  
parameter="@popSize.t:nd4\_pos3" weight="3.0"/>

<operator id="CoalescentConstantTreeScaler.t:nd5\_pos1" spec="ScaleOperator"  
scaleFactor="0.5" tree="@Tree.t:nd5\_pos1" weight="3.0"/>

<operator id="CoalescentConstantTreeRootScaler.t:nd5\_pos1" spec="ScaleOperator"  
rootOnly="true" scaleFactor="0.5" tree="@Tree.t:nd5\_pos1" weight="3.0"/>

<operator id="CoalescentConstantUniformOperator.t:nd5\_pos1" spec="Uniform"  
tree="@Tree.t:nd5\_pos1" weight="30.0"/>

<operator id="CoalescentConstantSubtreeSlide.t:nd5\_pos1" spec="SubtreeSlide"  
tree="@Tree.t:nd5\_pos1" weight="15.0"/>

<operator id="CoalescentConstantNarrow.t:nd5\_pos1" spec="Exchange"  
tree="@Tree.t:nd5\_pos1" weight="15.0"/>

<operator id="CoalescentConstantWide.t:nd5\_pos1" spec="Exchange" isNarrow="false"  
tree="@Tree.t:nd5\_pos1" weight="3.0"/>



<operator id="CoalescentConstantWilsonBalding.t:nd5\_pos1" spec="WilsonBalding"  
tree="@Tree.t:nd5\_pos1" weight="3.0"/>

<operator id="PopSizeScaler.t:nd5\_pos1" spec="ScaleOperator"  
parameter="@popSize.t:nd5\_pos1" weight="3.0"/>

<operator id="CoalescentConstantTreeScaler.t:nd5\_pos2" spec="ScaleOperator"  
scaleFactor="0.5" tree="@Tree.t:nd5\_pos2" weight="3.0"/>

<operator id="CoalescentConstantTreeRootScaler.t:nd5\_pos2" spec="ScaleOperator"  
rootOnly="true" scaleFactor="0.5" tree="@Tree.t:nd5\_pos2" weight="3.0"/>

<operator id="CoalescentConstantUniformOperator.t:nd5\_pos2" spec="Uniform"  
tree="@Tree.t:nd5\_pos2" weight="30.0"/>

<operator id="CoalescentConstantSubtreeSlide.t:nd5\_pos2" spec="SubtreeSlide"  
tree="@Tree.t:nd5\_pos2" weight="15.0"/>

<operator id="CoalescentConstantNarrow.t:nd5\_pos2" spec="Exchange"  
tree="@Tree.t:nd5\_pos2" weight="15.0"/>

<operator id="CoalescentConstantWide.t:nd5\_pos2" spec="Exchange" isNarrow="false"  
tree="@Tree.t:nd5\_pos2" weight="3.0"/>

<operator id="CoalescentConstantWilsonBalding.t:nd5\_pos2" spec="WilsonBalding"  
tree="@Tree.t:nd5\_pos2" weight="3.0"/>

<operator id="PopSizeScaler.t:nd5\_pos2" spec="ScaleOperator"  
parameter="@popSize.t:nd5\_pos2" weight="3.0"/>

<operator id="CoalescentConstantTreeScaler.t:nd5\_pos3" spec="ScaleOperator"  
scaleFactor="0.5" tree="@Tree.t:nd5\_pos3" weight="3.0"/>

<operator id="CoalescentConstantTreeRootScaler.t:nd5\_pos3" spec="ScaleOperator"  
rootOnly="true" scaleFactor="0.5" tree="@Tree.t:nd5\_pos3" weight="3.0"/>

<operator id="CoalescentConstantUniformOperator.t:nd5\_pos3" spec="Uniform"  
tree="@Tree.t:nd5\_pos3" weight="30.0"/>

<operator id="CoalescentConstantSubtreeSlide.t:nd5\_pos3" spec="SubtreeSlide"  
tree="@Tree.t:nd5\_pos3" weight="15.0"/>

<operator id="CoalescentConstantNarrow.t:nd5\_pos3" spec="Exchange"  
tree="@Tree.t:nd5\_pos3" weight="15.0"/>

<operator id="CoalescentConstantWide.t:nd5\_pos3" spec="Exchange" isNarrow="false"  
tree="@Tree.t:nd5\_pos3" weight="3.0"/>

<operator id="CoalescentConstantWilsonBalding.t:nd5\_pos3" spec="WilsonBalding"  
tree="@Tree.t:nd5\_pos3" weight="3.0"/>

<operator id="PopSizeScaler.t:nd5\_pos3" spec="ScaleOperator"  
parameter="@popSize.t:nd5\_pos3" weight="3.0"/>

<operator id="CoalescentConstantTreeScaler.t:nd6\_pos1" spec="ScaleOperator"  
scaleFactor="0.5" tree="@Tree.t:nd6\_pos1" weight="3.0"/>

<operator id="CoalescentConstantTreeRootScaler.t:nd6\_pos1" spec="ScaleOperator"  
rootOnly="true" scaleFactor="0.5" tree="@Tree.t:nd6\_pos1" weight="3.0"/>

<operator id="CoalescentConstantUniformOperator.t:nd6\_pos1" spec="Uniform"  
tree="@Tree.t:nd6\_pos1" weight="30.0"/>

<operator id="CoalescentConstantSubtreeSlide.t:nd6\_pos1" spec="SubtreeSlide"  
tree="@Tree.t:nd6\_pos1" weight="15.0"/>

<operator id="CoalescentConstantNarrow.t:nd6\_pos1" spec="Exchange"  
tree="@Tree.t:nd6\_pos1" weight="15.0"/>

<operator id="CoalescentConstantWide.t:nd6\_pos1" spec="Exchange" isNarrow="false"  
tree="@Tree.t:nd6\_pos1" weight="3.0"/>

```
<operator id="CoalescentConstantWilsonBalding.t:nd6_pos1" spec="WilsonBalding"  
tree="@Tree.t:nd6_pos1" weight="3.0"/>
```

```
<operator id="PopSizeScaler.t:nd6_pos1" spec="ScaleOperator"  
parameter="@popSize.t:nd6_pos1" weight="3.0"/>
```

```
<operator id="CoalescentConstantTreeScaler.t:nd6_pos2" spec="ScaleOperator"  
scaleFactor="0.5" tree="@Tree.t:nd6_pos2" weight="3.0"/>
```

```
<operator id="CoalescentConstantTreeRootScaler.t:nd6_pos2" spec="ScaleOperator"  
rootOnly="true" scaleFactor="0.5" tree="@Tree.t:nd6_pos2" weight="3.0"/>
```

```
<operator id="CoalescentConstantUniformOperator.t:nd6_pos2" spec="Uniform"  
tree="@Tree.t:nd6_pos2" weight="30.0"/>
```

```
<operator id="CoalescentConstantSubtreeSlide.t:nd6_pos2" spec="SubtreeSlide"  
tree="@Tree.t:nd6_pos2" weight="15.0"/>
```

```
<operator id="CoalescentConstantNarrow.t:nd6_pos2" spec="Exchange"  
tree="@Tree.t:nd6_pos2" weight="15.0"/>
```

```
<operator id="CoalescentConstantWide.t:nd6_pos2" spec="Exchange" isNarrow="false"  
tree="@Tree.t:nd6_pos2" weight="3.0"/>
```

```
<operator id="CoalescentConstantWilsonBalding.t:nd6_pos2" spec="WilsonBalding"  
tree="@Tree.t:nd6_pos2" weight="3.0"/>
```

```
<operator id="PopSizeScaler.t:nd6_pos2" spec="ScaleOperator"  
parameter="@popSize.t:nd6_pos2" weight="3.0"/>
```

```
<operator id="CoalescentConstantTreeScaler.t:nd6_pos3" spec="ScaleOperator"  
scaleFactor="0.5" tree="@Tree.t:nd6_pos3" weight="3.0"/>
```

```
<operator id="CoalescentConstantTreeRootScaler.t:nd6_pos3" spec="ScaleOperator"  
rootOnly="true" scaleFactor="0.5" tree="@Tree.t:nd6_pos3" weight="3.0"/>
```

```
<operator id="CoalescentConstantUniformOperator.t:nd6_pos3" spec="Uniform"
tree="@Tree.t:nd6_pos3" weight="30.0"/>
```

```
<operator id="CoalescentConstantSubtreeSlide.t:nd6_pos3" spec="SubtreeSlide"
tree="@Tree.t:nd6_pos3" weight="15.0"/>
```

```
<operator id="CoalescentConstantNarrow.t:nd6_pos3" spec="Exchange"
tree="@Tree.t:nd6_pos3" weight="15.0"/>
```

```
<operator id="CoalescentConstantWide.t:nd6_pos3" spec="Exchange" isNarrow="false"
tree="@Tree.t:nd6_pos3" weight="3.0"/>
```

```
<operator id="CoalescentConstantWilsonBalding.t:nd6_pos3" spec="WilsonBalding"
tree="@Tree.t:nd6_pos3" weight="3.0"/>
```

```
<operator id="PopSizeScaler.t:nd6_pos3" spec="ScaleOperator"
parameter="@popSize.t:nd6_pos3" weight="3.0"/>
```

```
<logger id="tracelog" spec="Logger" fileName="F126seq-pt8-11401-123ps4.log"
logEvery="1000" model="@posterior" sanitiseHeaders="true" sort="smart">
```

```
<log idref="posterior"/>
```

```
<log idref="likelihood"/>
```

```
<log idref="prior"/>
```

```
<log idref="treeLikelihood.nd4_pos3"/>
```

```
<log id="TreeHeight.t:nd4_pos3" spec="beast.evolution.tree.TreeHeightLogger"
tree="@Tree.t:nd4_pos3"/>
```

```
<log idref="clockRate.c:nd4_pos3"/>
```

```
<log idref="treeLikelihood.atp6_pos1"/>
```

```
<log id="TreeHeight.t:atp6_pos1" spec="beast.evolution.tree.TreeHeightLogger"
tree="@Tree.t:atp6_pos1"/>
```

```
<log idref="treeLikelihood.atp8_pos2"/>
```

```
<log id="TreeHeight.t:atp8_pos2" spec="beast.evolution.tree.TreeHeightLogger"
tree="@Tree.t:atp8_pos2"/>
```

```
<log idref="clockRate.c:atp8_pos2"/>
```

```
<log idref="treeLikelihood.nd4L_pos3"/>
```

```

<log id="TreeHeight.t:nd4L_pos3" spec="beast.evolution.tree.TreeHeightLogger"
tree="@Tree.t:nd4L_pos3"/>

<log idref="clockRate.c:nd4L_pos3"/>

<log idref="treeLikelihood.coi_pos3"/>

<log id="TreeHeight.t:coi_pos3" spec="beast.evolution.tree.TreeHeightLogger"
tree="@Tree.t:coi_pos3"/>

<log idref="clockRate.c:coi_pos3"/>

<log idref="treeLikelihood.nd2_pos3"/>

<log id="TreeHeight.t:nd2_pos3" spec="beast.evolution.tree.TreeHeightLogger"
tree="@Tree.t:nd2_pos3"/>

<log idref="clockRate.c:nd2_pos3"/>

<log idref="treeLikelihood.coiii_pos2"/>

<log id="TreeHeight.t:coiii_pos2" spec="beast.evolution.tree.TreeHeightLogger"
tree="@Tree.t:coiii_pos2"/>

<log idref="clockRate.c:coiii_pos2"/>

<log idref="treeLikelihood.nd6_pos3"/>

<log id="TreeHeight.t:nd6_pos3" spec="beast.evolution.tree.TreeHeightLogger"
tree="@Tree.t:nd6_pos3"/>

<log idref="clockRate.c:nd6_pos3"/>

<log idref="treeLikelihood.nd1_pos3"/>

<log id="TreeHeight.t:nd1_pos3" spec="beast.evolution.tree.TreeHeightLogger"
tree="@Tree.t:nd1_pos3"/>

<log idref="clockRate.c:nd1_pos3"/>

<log idref="treeLikelihood.coii_pos3"/>

<log id="TreeHeight.t:coii_pos3" spec="beast.evolution.tree.TreeHeightLogger"
tree="@Tree.t:coii_pos3"/>

<log idref="clockRate.c:coii_pos3"/>

<log idref="treeLikelihood.nd2_pos2"/>

<log id="TreeHeight.t:nd2_pos2" spec="beast.evolution.tree.TreeHeightLogger"
tree="@Tree.t:nd2_pos2"/>

<log idref="clockRate.c:nd2_pos2"/>

<log idref="treeLikelihood.nd4L_pos1"/>

<log id="TreeHeight.t:nd4L_pos1" spec="beast.evolution.tree.TreeHeightLogger"
tree="@Tree.t:nd4L_pos1"/>

<log idref="clockRate.c:nd4L_pos1"/>

```

```
<log idref="treeLikelihood.coi_pos2"/>

<log id="TreeHeight.t:coi_pos2" spec="beast.evolution.tree.TreeHeightLogger"
tree="@Tree.t:coi_pos2"/>

<log idref="clockRate.c:coi_pos2"/>

<log idref="treeLikelihood.coii_pos2"/>

<log id="TreeHeight.t:coii_pos2" spec="beast.evolution.tree.TreeHeightLogger"
tree="@Tree.t:coii_pos2"/>

<log idref="clockRate.c:coii_pos2"/>

<log idref="treeLikelihood.coii_pos1"/>

<log id="TreeHeight.t:coii_pos1" spec="beast.evolution.tree.TreeHeightLogger"
tree="@Tree.t:coii_pos1"/>

<log idref="clockRate.c:coii_pos1"/>

<log idref="treeLikelihood.nd1_pos1"/>

<log id="TreeHeight.t:nd1_pos1" spec="beast.evolution.tree.TreeHeightLogger"
tree="@Tree.t:nd1_pos1"/>

<log idref="clockRate.c:nd1_pos1"/>

<log idref="treeLikelihood.nd4_pos1"/>

<log id="TreeHeight.t:nd4_pos1" spec="beast.evolution.tree.TreeHeightLogger"
tree="@Tree.t:nd4_pos1"/>

<log idref="clockRate.c:nd4_pos1"/>

<log idref="treeLikelihood.nd5_pos1"/>

<log id="TreeHeight.t:nd5_pos1" spec="beast.evolution.tree.TreeHeightLogger"
tree="@Tree.t:nd5_pos1"/>

<log idref="clockRate.c:nd5_pos1"/>

<log idref="treeLikelihood.atp6_pos2"/>

<log id="TreeHeight.t:atp6_pos2" spec="beast.evolution.tree.TreeHeightLogger"
tree="@Tree.t:atp6_pos2"/>

<log idref="clockRate.c:atp6_pos2"/>

<log idref="treeLikelihood.nd5_pos3"/>

<log id="TreeHeight.t:nd5_pos3" spec="beast.evolution.tree.TreeHeightLogger"
tree="@Tree.t:nd5_pos3"/>

<log idref="clockRate.c:nd5_pos3"/>

<log idref="treeLikelihood.atp6_pos3"/>

<log id="TreeHeight.t:atp6_pos3" spec="beast.evolution.tree.TreeHeightLogger"
tree="@Tree.t:atp6_pos3"/>
```

```
<log idref="clockRate.c:atp6_pos3"/>

<log idref="treeLikelihood.nd3_pos1"/>

<log id="TreeHeight.t:nd3_pos1" spec="beast.evolution.tree.TreeHeightLogger"
tree="@Tree.t:nd3_pos1"/>

<log idref="clockRate.c:nd3_pos1"/>

<log idref="treeLikelihood.nd6_pos2"/>

<log id="TreeHeight.t:nd6_pos2" spec="beast.evolution.tree.TreeHeightLogger"
tree="@Tree.t:nd6_pos2"/>

<log idref="clockRate.c:nd6_pos2"/>

<log idref="treeLikelihood.coiii_pos1"/>

<log id="TreeHeight.t:coiii_pos1" spec="beast.evolution.tree.TreeHeightLogger"
tree="@Tree.t:coiii_pos1"/>

<log idref="clockRate.c:coiii_pos1"/>

<log idref="treeLikelihood.atp8_pos1"/>

<log id="TreeHeight.t:atp8_pos1" spec="beast.evolution.tree.TreeHeightLogger"
tree="@Tree.t:atp8_pos1"/>

<log idref="clockRate.c:atp8_pos1"/>

<log idref="treeLikelihood.nd5_pos2"/>

<log id="TreeHeight.t:nd5_pos2" spec="beast.evolution.tree.TreeHeightLogger"
tree="@Tree.t:nd5_pos2"/>

<log idref="clockRate.c:nd5_pos2"/>

<log idref="treeLikelihood.nd3_pos3"/>

<log id="TreeHeight.t:nd3_pos3" spec="beast.evolution.tree.TreeHeightLogger"
tree="@Tree.t:nd3_pos3"/>

<log idref="clockRate.c:nd3_pos3"/>

<log idref="treeLikelihood.cytb_pos3"/>

<log id="TreeHeight.t:cytb_pos3" spec="beast.evolution.tree.TreeHeightLogger"
tree="@Tree.t:cytb_pos3"/>

<log idref="clockRate.c:cytb_pos3"/>

<log idref="treeLikelihood.cytb_pos1"/>

<log id="TreeHeight.t:cytb_pos1" spec="beast.evolution.tree.TreeHeightLogger"
tree="@Tree.t:cytb_pos1"/>

<log idref="clockRate.c:cytb_pos1"/>

<log idref="treeLikelihood.cytb_pos2"/>
```

```

<log id="TreeHeight.t:cytb_pos2" spec="beast.evolution.tree.TreeHeightLogger"
tree="@Tree.t:cytb_pos2"/>

<log idref="clockRate.c:cytb_pos2"/>

<log idref="treeLikelihood.nd3_pos2"/>

<log id="TreeHeight.t:nd3_pos2" spec="beast.evolution.tree.TreeHeightLogger"
tree="@Tree.t:nd3_pos2"/>

<log idref="clockRate.c:nd3_pos2"/>

<log idref="treeLikelihood.coi_pos1"/>

<log id="TreeHeight.t:coi_pos1" spec="beast.evolution.tree.TreeHeightLogger"
tree="@Tree.t:coi_pos1"/>

<log idref="clockRate.c:coi_pos1"/>

<log idref="treeLikelihood.coiii_pos3"/>

<log id="TreeHeight.t:coiii_pos3" spec="beast.evolution.tree.TreeHeightLogger"
tree="@Tree.t:coiii_pos3"/>

<log idref="clockRate.c:coiii_pos3"/>

<log idref="treeLikelihood.nd1_pos2"/>

<log id="TreeHeight.t:nd1_pos2" spec="beast.evolution.tree.TreeHeightLogger"
tree="@Tree.t:nd1_pos2"/>

<log idref="clockRate.c:nd1_pos2"/>

<log idref="treeLikelihood.nd4L_pos2"/>

<log id="TreeHeight.t:nd4L_pos2" spec="beast.evolution.tree.TreeHeightLogger"
tree="@Tree.t:nd4L_pos2"/>

<log idref="clockRate.c:nd4L_pos2"/>

<log idref="treeLikelihood.atp8_pos3"/>

<log id="TreeHeight.t:atp8_pos3" spec="beast.evolution.tree.TreeHeightLogger"
tree="@Tree.t:atp8_pos3"/>

<log idref="clockRate.c:atp8_pos3"/>

<log idref="treeLikelihood.nd4_pos2"/>

<log id="TreeHeight.t:nd4_pos2" spec="beast.evolution.tree.TreeHeightLogger"
tree="@Tree.t:nd4_pos2"/>

<log idref="clockRate.c:nd4_pos2"/>

<log idref="treeLikelihood.nd6_pos1"/>

<log id="TreeHeight.t:nd6_pos1" spec="beast.evolution.tree.TreeHeightLogger"
tree="@Tree.t:nd6_pos1"/>

<log idref="clockRate.c:nd6_pos1"/>

```



```

<log idref="treeLikelihood.nd2_pos1"/>

<log id="TreeHeight.t:nd2_pos1" spec="beast.evolution.tree.TreeHeightLogger"
tree="@Tree.t:nd2_pos1"/>

<log idref="clockRate.c:nd2_pos1"/>

<log idref="treeLikelihood.Fl26seq-pt8-11401-123ps4"/>

<log id="TreeHeight.t:Fl26seq-pt8-11401-123ps4"
spec="beast.evolution.tree.TreeHeightLogger" tree="@Tree.t:Fl26seq-pt8-11401-123ps4"/>

<log idref="clockRate.c:Fl26seq-pt8-11401-123ps4"/>

<log idref="Fl26sq-3Pleuro+Par-oliv+P.o.MRCA.prior"/>

<log idref="parameter.hyperLogNormalDistributionModel-M-Fl26sq-Par-oliv+Pleuro"/>

<log idref="HyperPrior.hyperLogNormalDistributionModel-M-Fl26sq-Par-oliv+Pleuro"/>

<log idref="parameter.hyperLogNormalDistributionModel-S-Fl26sq-Par-oliv+Pleuro"/>

<log idref="HyperPrior.hyperLogNormalDistributionModel-S-Fl26sq-Par-oliv+Pleuro"/>

<log idref="parameter.hyperGamma-alpha-HyperPrior.hyperLogNormalDistributionModel-
M-Fl26sq-Par-oliv+Pleuro"/>

<log idref="HyperPrior.hyperGamma-alpha-
HyperPrior.hyperLogNormalDistributionModel-M-Fl26sq-Par-oliv+Pleuro"/>

<log idref="parameter.hyperGamma-beta-HyperPrior.hyperLogNormalDistributionModel-
M-Fl26sq-Par-oliv+Pleuro"/>

<log idref="HyperPrior.hyperGamma-beta-HyperPrior.hyperLogNormalDistributionModel-
M-Fl26sq-Par-oliv+Pleuro"/>

<log idref="parameter.hyperGamma-alpha-HyperPrior.hyperGamma-alpha-
HyperPrior.hyperLogNormalDistributionModel-M-Fl26sq-Par-oliv+Pleuro"/>

<log idref="HyperPrior.hyperGamma-alpha-HyperPrior.hyperGamma-alpha-
HyperPrior.hyperLogNormalDistributionModel-M-Fl26sq-Par-oliv+Pleuro"/>

<log idref="parameter.hyperGamma-beta-HyperPrior.hyperGamma-alpha-
HyperPrior.hyperLogNormalDistributionModel-M-Fl26sq-Par-oliv+Pleuro"/>

<log idref="HyperPrior.hyperGamma-beta-HyperPrior.hyperGamma-alpha-
HyperPrior.hyperLogNormalDistributionModel-M-Fl26sq-Par-oliv+Pleuro"/>

<log idref="parameter.hyperGamma-alpha-HyperPrior.hyperGamma-alpha-
HyperPrior.hyperGamma-alpha-HyperPrior.hyperLogNormalDistributionModel-M-Fl26sq-Par-
oliv+Pleuro"/>

<log idref="HyperPrior.hyperGamma-alpha-HyperPrior.hyperGamma-alpha-
HyperPrior.hyperGamma-alpha-HyperPrior.hyperLogNormalDistributionModel-M-Fl26sq-Par-
oliv+Pleuro"/>

```

<log idref="parameter.hyperGamma-beta-HyperPrior.hyperGamma-alpha-HyperPrior.hyperGamma-alpha-HyperPrior.hyperLogNormalDistributionModel-M-Fl26sq-Par-oliv+Pleuro"/>

<log idref="HyperPrior.hyperGamma-beta-HyperPrior.hyperGamma-alpha-HyperPrior.hyperGamma-alpha-HyperPrior.hyperLogNormalDistributionModel-M-Fl26sq-Par-oliv+Pleuro"/>

<log idref="parameter.hyperGamma-alpha-Fl26sq-Par-oliv+Pleuro"/>

<log idref="HyperPrior.hyperGamma-alpha-Fl26sq-Par-oliv+Pleuro"/>

<log idref="parameter.hyperGamma-beta-Fl26sq-Par-oliv+Pleuro"/>

<log idref="HyperPrior.hyperGamma-beta-Fl26sq-Par-oliv+Pleuro"/>

<log idref="parameter.hyperGamma-alpha-Fl26sq-Par-oliv+Pleuro"/>

<log idref="parameter.hyperGamma-beta-Fl26sq-Par-oliv+Pleuro"/>

<log idref="parameter.hyperGamma-alpha-CalibratedYuleBirthRatePrior.t:nd5\_pos2"/>

<log idref="HyperPrior.hyperGamma-alpha-CalibratedYuleBirthRatePrior.t:nd5\_pos2"/>

<log idref="parameter.hyperGamma-beta-CalibratedYuleBirthRatePrior.t:nd5\_pos2"/>

<log idref="HyperPrior.hyperGamma-beta-CalibratedYuleBirthRatePrior.t:nd5\_pos2"/>

<log idref="parameter.hyperGamma-alpha-UCMeanRatePrior.c:atp6\_pos1"/>

<log idref="HyperPrior.hyperGamma-alpha-UCMeanRatePrior.c:atp6\_pos1"/>

<log idref="parameter.hyperGamma-beta-UCMeanRatePrior.c:atp6\_pos1"/>

<log idref="HyperPrior.hyperGamma-beta-UCMeanRatePrior.c:atp6\_pos1"/>

<log idref="ucedMean.c:atp6\_pos1"/>

<log id="rateStat.c:atp6\_pos1" spec="beast.evolution.branchratemodel.RateStatistic" branchratemodel="@ExponentialRelaxedClock.c:atp6\_pos1" tree="@Tree.t:atp6\_pos1"/>

<log idref="parameter.hyperLogNormalDistributionModel-M-Fl26sq-Par-oliv+Pleuro1.prior"/>

<log idref="HyperPrior.hyperLogNormalDistributionModel-M-Fl26sq-Par-oliv+Pleuro1.prior"/>

<log idref="parameter.hyperLogNormalDistributionModel-S-Fl26sq-Par-oliv+Pleuro1.prior"/>

<log idref="HyperPrior.hyperLogNormalDistributionModel-S-Fl26sq-Par-oliv+Pleuro1.prior"/>

<log idref="parameter.hyperGamma-alpha-ClockPrior.c:Fl26seq-pt8-11401-123ps4"/>

<log idref="HyperPrior.hyperGamma-alpha-ClockPrior.c:Fl26seq-pt8-11401-123ps4"/>

<log idref="parameter.hyperGamma-beta-ClockPrior.c:Fl26seq-pt8-11401-123ps4"/>

<log idref="HyperPrior.hyperGamma-beta-ClockPrior.c:Fl26seq-pt8-11401-123ps4"/>

<log idref="popSize.t:Fl26seq-pt8-11401-123ps4"/>  
<log idref="CoalescentConstant.t:Fl26seq-pt8-11401-123ps4"/>  
<log idref="popSize.t:atp6\_pos1"/>  
<log idref="CoalescentConstant.t:atp6\_pos1"/>  
<log idref="popSize.t:atp6\_pos2"/>  
<log idref="CoalescentConstant.t:atp6\_pos2"/>  
<log idref="popSize.t:atp6\_pos3"/>  
<log idref="CoalescentConstant.t:atp6\_pos3"/>  
<log idref="popSize.t:atp8\_pos1"/>  
<log idref="CoalescentConstant.t:atp8\_pos1"/>  
<log idref="popSize.t:atp8\_pos2"/>  
<log idref="CoalescentConstant.t:atp8\_pos2"/>  
<log idref="popSize.t:atp8\_pos3"/>  
<log idref="CoalescentConstant.t:atp8\_pos3"/>  
<log idref="popSize.t:coi\_pos1"/>  
<log idref="CoalescentConstant.t:coi\_pos1"/>  
<log idref="popSize.t:coi\_pos2"/>  
<log idref="CoalescentConstant.t:coi\_pos2"/>  
<log idref="popSize.t:coi\_pos3"/>  
<log idref="CoalescentConstant.t:coi\_pos3"/>  
<log idref="popSize.t:coii\_pos1"/>  
<log idref="CoalescentConstant.t:coii\_pos1"/>  
<log idref="popSize.t:coii\_pos2"/>  
<log idref="CoalescentConstant.t:coii\_pos2"/>  
<log idref="popSize.t:coii\_pos3"/>  
<log idref="CoalescentConstant.t:coii\_pos3"/>  
<log idref="popSize.t:coiii\_pos1"/>  
<log idref="CoalescentConstant.t:coiii\_pos1"/>  
<log idref="popSize.t:coiii\_pos2"/>  
<log idref="CoalescentConstant.t:coiii\_pos2"/>  
<log idref="popSize.t:coiii\_pos3"/>  
<log idref="CoalescentConstant.t:coiii\_pos3"/>

<log idref="popSize.t:cytb\_pos1"/>  
<log idref="CoalescentConstant.t:cytb\_pos1"/>  
<log idref="popSize.t:cytb\_pos2"/>  
<log idref="CoalescentConstant.t:cytb\_pos2"/>  
<log idref="popSize.t:cytb\_pos3"/>  
<log idref="CoalescentConstant.t:cytb\_pos3"/>  
<log idref="popSize.t:nd1\_pos1"/>  
<log idref="CoalescentConstant.t:nd1\_pos1"/>  
<log idref="popSize.t:nd1\_pos2"/>  
<log idref="CoalescentConstant.t:nd1\_pos2"/>  
<log idref="popSize.t:nd1\_pos3"/>  
<log idref="CoalescentConstant.t:nd1\_pos3"/>  
<log idref="popSize.t:nd2\_pos1"/>  
<log idref="CoalescentConstant.t:nd2\_pos1"/>  
<log idref="popSize.t:nd2\_pos2"/>  
<log idref="CoalescentConstant.t:nd2\_pos2"/>  
<log idref="popSize.t:nd2\_pos3"/>  
<log idref="CoalescentConstant.t:nd2\_pos3"/>  
<log idref="popSize.t:nd3\_pos1"/>  
<log idref="CoalescentConstant.t:nd3\_pos1"/>  
<log idref="popSize.t:nd3\_pos2"/>  
<log idref="CoalescentConstant.t:nd3\_pos2"/>  
<log idref="popSize.t:nd3\_pos3"/>  
<log idref="CoalescentConstant.t:nd3\_pos3"/>  
<log idref="popSize.t:nd4L\_pos1"/>  
<log idref="CoalescentConstant.t:nd4L\_pos1"/>  
<log idref="popSize.t:nd4L\_pos2"/>  
<log idref="CoalescentConstant.t:nd4L\_pos2"/>  
<log idref="popSize.t:nd4L\_pos3"/>  
<log idref="CoalescentConstant.t:nd4L\_pos3"/>  
<log idref="popSize.t:nd4\_pos1"/>  
<log idref="CoalescentConstant.t:nd4\_pos1"/>

```

<log idref="popSize.t:nd4_pos2"/>
<log idref="CoalescentConstant.t:nd4_pos2"/>
<log idref="popSize.t:nd4_pos3"/>
<log idref="CoalescentConstant.t:nd4_pos3"/>
<log idref="popSize.t:nd5_pos1"/>
<log idref="CoalescentConstant.t:nd5_pos1"/>
<log idref="popSize.t:nd5_pos2"/>
<log idref="CoalescentConstant.t:nd5_pos2"/>
<log idref="popSize.t:nd5_pos3"/>
<log idref="CoalescentConstant.t:nd5_pos3"/>
<log idref="popSize.t:nd6_pos1"/>
<log idref="CoalescentConstant.t:nd6_pos1"/>
<log idref="popSize.t:nd6_pos2"/>
<log idref="CoalescentConstant.t:nd6_pos2"/>
<log idref="popSize.t:nd6_pos3"/>
<log idref="CoalescentConstant.t:nd6_pos3"/>
</logger>

```

```

<logger id="screenlog" spec="Logger" logEvery="1000">
  <log idref="posterior"/>
  <log id="ESS.0" spec="util.ESS" arg="@posterior"/>
  <log idref="likelihood"/>
  <log idref="prior"/>
</logger>

```

```

<logger id="treelog.t:nd4_pos3" spec="Logger" fileName="$(tree).trees" logEvery="1000"
mode="tree">
  <log id="TreeWithMetaDataLogger.t:nd4_pos3"
spec="beast.evolution.tree.TreeWithMetaDataLogger" tree="@Tree.t:nd4_pos3"/>
</logger>

```

```

<logger id="treelog.t:atp6_pos1" spec="Logger" fileName="$(tree).trees" logEvery="1000"
mode="tree">

```

```
<log id="TreeWithMetaDataLogger.t:atp6_pos1"
spec="beast.evolution.tree.TreeWithMetaDataLogger"
branchratemodel="@ExponentialRelaxedClock.c:atp6_pos1" tree="@Tree.t:atp6_pos1"/>

</logger>
```

```
<logger id="treelog.t:atp8_pos2" spec="Logger" fileName="$(tree).trees" logEvery="1000"
mode="tree">
```

```
<log id="TreeWithMetaDataLogger.t:atp8_pos2"
spec="beast.evolution.tree.TreeWithMetaDataLogger" tree="@Tree.t:atp8_pos2"/>

</logger>
```

```
<logger id="treelog.t:nd4L_pos3" spec="Logger" fileName="$(tree).trees" logEvery="1000"
mode="tree">
```

```
<log id="TreeWithMetaDataLogger.t:nd4L_pos3"
spec="beast.evolution.tree.TreeWithMetaDataLogger" tree="@Tree.t:nd4L_pos3"/>

</logger>
```

```
<logger id="treelog.t:coi_pos3" spec="Logger" fileName="$(tree).trees" logEvery="1000"
mode="tree">
```

```
<log id="TreeWithMetaDataLogger.t:coi_pos3"
spec="beast.evolution.tree.TreeWithMetaDataLogger" tree="@Tree.t:coi_pos3"/>

</logger>
```

```
<logger id="treelog.t:nd2_pos3" spec="Logger" fileName="$(tree).trees" logEvery="1000"
mode="tree">
```

```
<log id="TreeWithMetaDataLogger.t:nd2_pos3"
spec="beast.evolution.tree.TreeWithMetaDataLogger" tree="@Tree.t:nd2_pos3"/>

</logger>
```

```
<logger id="treelog.t:coiii_pos2" spec="Logger" fileName="$(tree).trees" logEvery="1000"
mode="tree">
```

```
<log id="TreeWithMetaDataLogger.t:coiii_pos2"
spec="beast.evolution.tree.TreeWithMetaDataLogger" tree="@Tree.t:coiii_pos2"/>

</logger>
```

```
<logger id="treelog.t:nd6_pos3" spec="Logger" fileName="$(tree).trees" logEvery="1000"
mode="tree">
```

```
<log id="TreeWithMetaDataLogger.t:nd6_pos3"
spec="beast.evolution.tree.TreeWithMetaDataLogger" tree="@Tree.t:nd6_pos3"/>

</logger>
```

```
<logger id="treelog.t:nd1_pos3" spec="Logger" fileName="$(tree).trees" logEvery="1000"
mode="tree">
```

```
<log id="TreeWithMetaDataLogger.t:nd1_pos3"
spec="beast.evolution.tree.TreeWithMetaDataLogger" tree="@Tree.t:nd1_pos3"/>

</logger>
```

```
<logger id="treelog.t:coii_pos3" spec="Logger" fileName="$(tree).trees" logEvery="1000"
mode="tree">
```

```
<log id="TreeWithMetaDataLogger.t:coii_pos3"
spec="beast.evolution.tree.TreeWithMetaDataLogger" tree="@Tree.t:coii_pos3"/>

</logger>
```

```
<logger id="treelog.t:nd2_pos2" spec="Logger" fileName="$(tree).trees" logEvery="1000"
mode="tree">
```

```
<log id="TreeWithMetaDataLogger.t:nd2_pos2"
spec="beast.evolution.tree.TreeWithMetaDataLogger" tree="@Tree.t:nd2_pos2"/>

</logger>
```

```
<logger id="treelog.t:nd4L_pos1" spec="Logger" fileName="$(tree).trees" logEvery="1000"
mode="tree">
```

```
<log id="TreeWithMetaDataLogger.t:nd4L_pos1"
spec="beast.evolution.tree.TreeWithMetaDataLogger" tree="@Tree.t:nd4L_pos1"/>

</logger>
```

```
<logger id="treelog.t:coi_pos2" spec="Logger" fileName="$(tree).trees" logEvery="1000"
mode="tree">
```

```
<log id="TreeWithMetaDataLogger.t:coi_pos2"
spec="beast.evolution.tree.TreeWithMetaDataLogger" tree="@Tree.t:coi_pos2"/>

</logger>
```

```
<logger id="treelog.t:coii_pos2" spec="Logger" fileName="$(tree).trees" logEvery="1000"
mode="tree">
```

```
<log id="TreeWithMetaDataLogger.t:coii_pos2"
spec="beast.evolution.tree.TreeWithMetaDataLogger" tree="@Tree.t:coii_pos2"/>

</logger>
```

```
<logger id="treelog.t:coii_pos1" spec="Logger" fileName="$(tree).trees" logEvery="1000"
mode="tree">
```

```
<log id="TreeWithMetaDataLogger.t:coii_pos1"
spec="beast.evolution.tree.TreeWithMetaDataLogger" tree="@Tree.t:coii_pos1"/>

</logger>
```

```
<logger id="treelog.t:nd1_pos1" spec="Logger" fileName="$(tree).trees" logEvery="1000"
mode="tree">
```

```
<log id="TreeWithMetaDataLogger.t:nd1_pos1"
spec="beast.evolution.tree.TreeWithMetaDataLogger" tree="@Tree.t:nd1_pos1"/>

</logger>
```

```
<logger id="treelog.t:nd4_pos1" spec="Logger" fileName="$(tree).trees" logEvery="1000"
mode="tree">
```

```
<log id="TreeWithMetaDataLogger.t:nd4_pos1"
spec="beast.evolution.tree.TreeWithMetaDataLogger" tree="@Tree.t:nd4_pos1"/>

</logger>
```

```
<logger id="treelog.t:nd5_pos1" spec="Logger" fileName="$(tree).trees" logEvery="1000"
mode="tree">
```

```
<log id="TreeWithMetaDataLogger.t:nd5_pos1"
spec="beast.evolution.tree.TreeWithMetaDataLogger" tree="@Tree.t:nd5_pos1"/>

</logger>
```

```
<logger id="treelog.t:atp6_pos2" spec="Logger" fileName="$(tree).trees" logEvery="1000"
mode="tree">
```

```
<log id="TreeWithMetaDataLogger.t:atp6_pos2"
spec="beast.evolution.tree.TreeWithMetaDataLogger" tree="@Tree.t:atp6_pos2"/>

</logger>
```



```
<logger id="treelog.t:nd5_pos3" spec="Logger" fileName="$(tree).trees" logEvery="1000" mode="tree">
```

```
<log id="TreeWithMetaDataLogger.t:nd5_pos3" spec="beast.evolution.tree.TreeWithMetaDataLogger" tree="@Tree.t:nd5_pos3"/>
```

```
</logger>
```

```
<logger id="treelog.t:atp6_pos3" spec="Logger" fileName="$(tree).trees" logEvery="1000" mode="tree">
```

```
<log id="TreeWithMetaDataLogger.t:atp6_pos3" spec="beast.evolution.tree.TreeWithMetaDataLogger" tree="@Tree.t:atp6_pos3"/>
```

```
</logger>
```

```
<logger id="treelog.t:nd3_pos1" spec="Logger" fileName="$(tree).trees" logEvery="1000" mode="tree">
```

```
<log id="TreeWithMetaDataLogger.t:nd3_pos1" spec="beast.evolution.tree.TreeWithMetaDataLogger" tree="@Tree.t:nd3_pos1"/>
```

```
</logger>
```

```
<logger id="treelog.t:nd6_pos2" spec="Logger" fileName="$(tree).trees" logEvery="1000" mode="tree">
```

```
<log id="TreeWithMetaDataLogger.t:nd6_pos2" spec="beast.evolution.tree.TreeWithMetaDataLogger" tree="@Tree.t:nd6_pos2"/>
```

```
</logger>
```

```
<logger id="treelog.t:coiii_pos1" spec="Logger" fileName="$(tree).trees" logEvery="1000" mode="tree">
```

```
<log id="TreeWithMetaDataLogger.t:coiii_pos1" spec="beast.evolution.tree.TreeWithMetaDataLogger" tree="@Tree.t:coiii_pos1"/>
```

```
</logger>
```

```
<logger id="treelog.t:atp8_pos1" spec="Logger" fileName="$(tree).trees" logEvery="1000" mode="tree">
```

```
<log id="TreeWithMetaDataLogger.t:atp8_pos1" spec="beast.evolution.tree.TreeWithMetaDataLogger" tree="@Tree.t:atp8_pos1"/>
```

```
</logger>
```

```
<logger id="treelog.t:nd5_pos2" spec="Logger" fileName="$(tree).trees" logEvery="1000"
mode="tree">
```

```
<log id="TreeWithMetaDataLogger.t:nd5_pos2"
spec="beast.evolution.tree.TreeWithMetaDataLogger" tree="@Tree.t:nd5_pos2"/>

</logger>
```

```
<logger id="treelog.t:nd3_pos3" spec="Logger" fileName="$(tree).trees" logEvery="1000"
mode="tree">
```

```
<log id="TreeWithMetaDataLogger.t:nd3_pos3"
spec="beast.evolution.tree.TreeWithMetaDataLogger" tree="@Tree.t:nd3_pos3"/>

</logger>
```

```
<logger id="treelog.t:cytb_pos3" spec="Logger" fileName="$(tree).trees" logEvery="1000"
mode="tree">
```

```
<log id="TreeWithMetaDataLogger.t:cytb_pos3"
spec="beast.evolution.tree.TreeWithMetaDataLogger" tree="@Tree.t:cytb_pos3"/>

</logger>
```

```
<logger id="treelog.t:cytb_pos1" spec="Logger" fileName="$(tree).trees" logEvery="1000"
mode="tree">
```

```
<log id="TreeWithMetaDataLogger.t:cytb_pos1"
spec="beast.evolution.tree.TreeWithMetaDataLogger" tree="@Tree.t:cytb_pos1"/>

</logger>
```

```
<logger id="treelog.t:cytb_pos2" spec="Logger" fileName="$(tree).trees" logEvery="1000"
mode="tree">
```

```
<log id="TreeWithMetaDataLogger.t:cytb_pos2"
spec="beast.evolution.tree.TreeWithMetaDataLogger" tree="@Tree.t:cytb_pos2"/>

</logger>
```

```
<logger id="treelog.t:nd3_pos2" spec="Logger" fileName="$(tree).trees" logEvery="1000"
mode="tree">
```

```
<log id="TreeWithMetaDataLogger.t:nd3_pos2"
spec="beast.evolution.tree.TreeWithMetaDataLogger" tree="@Tree.t:nd3_pos2"/>

</logger>
```

```
<logger id="treelog.t:coi_pos1" spec="Logger" fileName="$(tree).trees" logEvery="1000"
mode="tree">
```

```
<log id="TreeWithMetaDataLogger.t:coi_pos1"
spec="beast.evolution.tree.TreeWithMetaDataLogger" tree="@Tree.t:coi_pos1"/>
```

```
</logger>
```

```
<logger id="treelog.t:coiii_pos3" spec="Logger" fileName="$(tree).trees" logEvery="1000"
mode="tree">
```

```
<log id="TreeWithMetaDataLogger.t:coiii_pos3"
spec="beast.evolution.tree.TreeWithMetaDataLogger" tree="@Tree.t:coiii_pos3"/>
```

```
</logger>
```

```
<logger id="treelog.t:nd1_pos2" spec="Logger" fileName="$(tree).trees" logEvery="1000"
mode="tree">
```

```
<log id="TreeWithMetaDataLogger.t:nd1_pos2"
spec="beast.evolution.tree.TreeWithMetaDataLogger" tree="@Tree.t:nd1_pos2"/>
```

```
</logger>
```

```
<logger id="treelog.t:nd4L_pos2" spec="Logger" fileName="$(tree).trees" logEvery="1000"
mode="tree">
```

```
<log id="TreeWithMetaDataLogger.t:nd4L_pos2"
spec="beast.evolution.tree.TreeWithMetaDataLogger" tree="@Tree.t:nd4L_pos2"/>
```

```
</logger>
```

```
<logger id="treelog.t:atp8_pos3" spec="Logger" fileName="$(tree).trees" logEvery="1000"
mode="tree">
```

```
<log id="TreeWithMetaDataLogger.t:atp8_pos3"
spec="beast.evolution.tree.TreeWithMetaDataLogger" tree="@Tree.t:atp8_pos3"/>
```

```
</logger>
```

```
<logger id="treelog.t:nd4_pos2" spec="Logger" fileName="$(tree).trees" logEvery="1000"
mode="tree">
```

```
<log id="TreeWithMetaDataLogger.t:nd4_pos2"
spec="beast.evolution.tree.TreeWithMetaDataLogger" tree="@Tree.t:nd4_pos2"/>
```

```
</logger>
```

```
<logger id="treelog.t:nd6_pos1" spec="Logger" fileName="$(tree).trees" logEvery="1000"
mode="tree">
```

```
<log id="TreeWithMetaDataLogger.t:nd6_pos1"
spec="beast.evolution.tree.TreeWithMetaDataLogger" tree="@Tree.t:nd6_pos1"/>

</logger>
```

```
<logger id="treelog.t:nd2_pos1" spec="Logger" fileName="$(tree).trees" logEvery="1000"
mode="tree">
```

```
<log id="TreeWithMetaDataLogger.t:nd2_pos1"
spec="beast.evolution.tree.TreeWithMetaDataLogger" tree="@Tree.t:nd2_pos1"/>

</logger>
```

```
<logger id="treelog.t:Fl26seq-pt8-11401-123ps4" spec="Logger" fileName="$(tree).trees"
logEvery="1000" mode="tree">
```

```
<log id="TreeWithMetaDataLogger.t:Fl26seq-pt8-11401-123ps4"
spec="beast.evolution.tree.TreeWithMetaDataLogger" tree="@Tree.t:Fl26seq-pt8-11401-
123ps4"/>

</logger>
```

```
</run>
```

```
</beast>
```
