# Supplementary material
Source: MDPI journal article supplement (https://www.mdpi.com/1424-2818/14/10/805)
Supplement: s1 [file s1]

Table 4S. Nucleotide content of 25 mitogenome sequences of PCGs among Pleuronectidae

| Species                                      | Mean frequencies of nucleotides (%) combined for the three codon positions |      |      |      |                         |
|----------------------------------------------|----------------------------------------------------------------------------|------|------|------|-------------------------|
|                                              | T                                                                          | C    | A    | G    | Length of sequence (bp) |
| Not aligned PCG sequences                    |                                                                            |      |      |      |                         |
| <i>Cleisthenes Herzensteini</i> KT223828     | 28.5                                                                       | 30.0 | 24.6 | 16.9 | 11457                   |
| <i>Hippoglossoides platessoides</i> MN122825 | 29.0                                                                       | 29.5 | 23.9 | 17.5 | 11445                   |
| <i>Hippoglossus hippoglossus</i> AM749122    | 28.6                                                                       | 29.7 | 24.7 | 17.0 | 11444                   |
| <i>Hippoglossus hippoglossus</i> AM749123    | 28.6                                                                       | 29.7 | 24.7 | 17.0 | 11443                   |
| <i>Hippoglossus hippoglossus</i> AM749124    | 28.6                                                                       | 29.8 | 24.7 | 17.0 | 11443                   |
| <i>Hippoglossus stenolepis</i> AM749126      | 28.7                                                                       | 29.6 | 24.9 | 16.8 | 11443                   |
| <i>Hippoglossus stenolepis</i> AM749127      | 28.7                                                                       | 29.6 | 24.9 | 16.8 | 11443                   |
| <i>Hippoglossus stenolepis</i> AM749128      | 28.7                                                                       | 29.6 | 24.9 | 16.8 | 11443                   |
| <i>Hippoglossus stenolepis</i> AM749129      | 28.7                                                                       | 29.6 | 24.9 | 16.8 | 11443                   |
| <i>Limanda aspera</i> KP013094               | 29.0                                                                       | 29.5 | 24.2 | 17.4 | 11445                   |
| <i>Limanda limanda</i> MN122886              | 29.2                                                                       | 29.3 | 24.0 | 17.5 | 11445                   |
| <i>Platichthys stellatus</i> PS2011          | 28.5                                                                       | 30.0 | 24.0 | 17.5 | 11436                   |
| <i>Pleuronichthys cornutus</i> JQ639071      | 29.9                                                                       | 29.0 | 25.0 | 16.1 | 11484                   |
| <i>Pleuronichthys japonicus</i> KY038655     | 30.4                                                                       | 28.6 | 24.8 | 16.3 | 11474                   |

|                                                    |                         |                         |                         |                         |              |
|----------------------------------------------------|-------------------------|-------------------------|-------------------------|-------------------------|--------------|
| <i>Pseudopleuronectes herzensteini</i><br>MW713061 | 28.4                    | 30.1                    | 24.1                    | 17.4                    | 11438        |
| <i>Pseudopleuronectes yokohamae</i><br>KT224485    | 28.6                    | 29.7                    | 24.5                    | 17.1                    | 11437        |
| <i>Pseudopleuronectes yokohamae</i><br>KT878309    | 28.6                    | 29.8                    | 24.5                    | 17.1                    | 11436        |
| <i>Reinhardtius hippoglossoides</i><br>AM749130    | 29.0                    | 29.4                    | 24.9                    | 16.7                    | 11443        |
| <i>Reinhardtius hippoglossoides</i><br>AM749131    | 29.1                    | 29.3                    | 24.9                    | 16.7                    | 11443        |
| <i>Reinhardtius hippoglossoides</i><br>AM749132    | 29.1                    | 29.3                    | 24.9                    | 16.7                    | 11443        |
| <i>Reinhardtius hippoglossoides</i><br>AM749133    | 29.1                    | 29.3                    | 24.8                    | 16.7                    | 11443        |
| <i>Verasper moseri</i> EF025506                    | 29.1                    | 29.4                    | 24.9                    | 16.5                    | 11434        |
| <i>Verasper moseri</i> LC583747                    | 29.1                    | 29.5                    | 24.9                    | 16.5                    | 11434        |
| <i>Verasper variegatus</i> DQ403797                | 29.3                    | 29.5                    | 24.8                    | 16.4                    | 11434        |
| <i>Verasper variegatus</i> MK210571                | 29.3                    | 29.5                    | 24.8                    | 16.4                    | 11434        |
| <b>Average, n=25</b>                               | <b><u>28.9±0.08</u></b> | <b><u>29.5±0.08</u></b> | <b><u>24.6±0.08</u></b> | <b><u>16.9±0.08</u></b> | <b>11444</b> |
| <b>Aligned PCG sequences</b>                       |                         |                         |                         |                         |              |
| <i>Cleisthenes herzensteini</i> KT223828           | 28.6                    | 30.0                    | 24.6                    | 16.8                    | 11401        |
| <i>Hippoglossoides platessoides</i><br>MN122825    | 29.1                    | 29.6                    | 23.9                    | 17.5                    | 11401        |
| <i>Hippoglossus hippoglossus</i><br>AM749122       | 28.6                    | 29.8                    | 24.6                    | 17.0                    | 11401        |
| <i>Hippoglossus hippoglossus</i><br>AM749123       | 28.6                    | 29.8                    | 24.6                    | 17.0                    | 11401        |

|                                                    |      |      |      |      |       |
|----------------------------------------------------|------|------|------|------|-------|
| <i>Hippoglossus hippoglossus</i><br>AM749124       | 28.6 | 29.8 | 24.6 | 17.0 | 11401 |
| <i>Hippoglossus stenolepis</i> AM749126            | 28.7 | 29.6 | 24.9 | 16.8 | 11401 |
| <i>Hippoglossus stenolepis</i> AM749127            | 28.7 | 29.6 | 24.9 | 16.8 | 11401 |
| <i>Hippoglossus stenolepis</i> AM749128            | 28.7 | 29.6 | 24.9 | 16.8 | 11401 |
| <i>Hippoglossus stenolepis</i> AM749129            | 28.7 | 29.6 | 24.9 | 16.8 | 11401 |
| <i>Limanda aspera</i> KP013094                     | 29.1 | 29.5 | 24.1 | 17.3 | 11401 |
| <i>Limanda limanda</i> MN122886                    | 29.2 | 29.3 | 24.0 | 17.5 | 11401 |
| <i>Platichthys stellatus</i> Ps2011                | 28.5 | 30.0 | 23.9 | 17.5 | 11401 |
| <i>Pleuronichthys cornutus</i> JQ639071            | 30.0 | 29.1 | 24.9 | 16.1 | 11400 |
| <i>Pleuronichthys japonicus</i> KY038655           | 30.4 | 28.6 | 24.8 | 16.2 | 11401 |
| <i>Pseudopleuronectes herzensteini</i><br>MW713061 | 28.4 | 30.2 | 24.0 | 17.4 | 11401 |
| <i>Pseudopleuronectes yokohamae</i><br>KT224485    | 28.7 | 29.8 | 24.5 | 17.1 | 11401 |
| <i>Pseudopleuronectes yokohamae</i><br>KT878309    | 28.7 | 29.8 | 24.5 | 17.1 | 11401 |
| <i>Reinhardtius hippoglossoides</i><br>AM749130    | 29.1 | 29.4 | 24.8 | 16.7 | 11401 |
| <i>Reinhardtius hippoglossoides</i><br>AM749131    | 29.1 | 29.4 | 24.8 | 16.7 | 11401 |
| <i>Reinhardtius hippoglossoides</i><br>AM749132    | 29.1 | 29.4 | 24.8 | 16.7 | 11401 |
| <i>Reinhardtius hippoglossoides</i><br>AM749133    | 29.1 | 29.4 | 24.8 | 16.7 | 11401 |
| <i>Verasper moseri</i> EF025506                    | 29.2 | 29.4 | 24.9 | 16.5 | 11401 |
| <i>Verasper moseri</i> LC583747                    | 29.2 | 29.5 | 24.8 | 16.5 | 11401 |

|                                     |                         |                         |                         |                         |              |
|-------------------------------------|-------------------------|-------------------------|-------------------------|-------------------------|--------------|
| <i>Verasper variegatus</i> DQ403797 | 29.3                    | 29.5                    | 24.8                    | 16.4                    | 11401        |
| <i>Verasper variegatus</i> MK210571 | 29.3                    | 29.5                    | 24.8                    | 16.4                    | 11401        |
| <b>Average, n=25</b>                | <b><u>29.0±0.08</u></b> | <b><u>29.6±0.08</u></b> | <b><u>24.6±0.08</u></b> | <b><u>16.8±0.08</u></b> | <b>11401</b> |

Note. Standard errors for average frequencies and heterogeneity of nucleotide content among four nucleotide types (T, C, A, G) are estimated by ANOVA/MANOVA testing of two subsets as given in the table for unaligned and aligned sequences. Heterogeneity of nucleotide frequencies between four types of nucleotides is statistically significant in each of 2 data subsets. Wilk's Lambda=0.0054, F=801, d.f.=6;380,  $P<00001$ . Average frequencies between 4 types of nucleotides for two subsets do not differ: Wilk's Lambda=0.9981, F=0, d.f.=6;380,  $P<0.9992$ .
